# Supplementary material
Source: PubMed Central journal article supplement (PMC4070589)
Supplement: NIHMS573166-supplement-1.pdf [file NIHMS573166-supplement-1.pdf]

## Supplementary Information

### Genomic and molecular characterization of esophageal squamous cell carcinoma

De-Chen Lin<sup>1,2,8,9</sup>, Jia-Jie Hao<sup>3,8</sup>, Yasunobu Nagata<sup>4,8</sup>, Liang Xu<sup>2,8</sup>, Li Shang<sup>3</sup>, Xuan Meng<sup>2</sup>, Yusuke Sato<sup>4</sup>, Yusuke Okuno<sup>4</sup>, Ana Maria Varela<sup>2</sup>, Ling-Wen Ding<sup>2</sup>, Manoj Garg<sup>2</sup>, Li-Zhen Liu<sup>2</sup>, Henry Yang<sup>2</sup>, Dong Yin<sup>5</sup>, Zhi-Zhou Shi<sup>3</sup>, Yan-Yi Jiang<sup>3</sup>, Wen-Yue Gu<sup>3</sup>, Ting Gong<sup>3</sup>, Yu Zhang<sup>3</sup>, Xin Xu<sup>3</sup>, Ori Kalid<sup>6</sup>, Sharon Shacham<sup>6</sup>, Seishi Ogawa<sup>4</sup>, Ming-Rong Wang<sup>3,9</sup> and H. Phillip Koeffler<sup>1,2,7</sup>

<sup>1</sup>Cedars-Sinai Medical Center, Division of Hematology/Oncology, UCLA School of Medicine, Los Angeles, USA;

<sup>2</sup>Cancer Science Institute of Singapore, National University of Singapore, Singapore;

<sup>3</sup>State Key Laboratory of Molecular Oncology, Cancer Institute (Hospital), Peking Union Medical College and Chinese Academy of Medical Sciences, Beijing, China;

<sup>4</sup>Cancer Genomics Project, Graduate School of Medicine, The University of Tokyo, Tokyo, Japan

<sup>5</sup>Medical Research Center, Sun Yat-Sen Memorial Hospital, Guangzhou, China

<sup>6</sup>Karyopharm Therapeutics, Natick, MA, USA

<sup>7</sup>National University Cancer Institute, National University Hospital Singapore, Singapore

<sup>8</sup>These authors contributed equally to this work.

<sup>9</sup>Correspondence should be addressed to M-R.W. (wangmr2015@126.com) or D-C.L. (dchlin11@gmail.com).

## Supplementary Figures

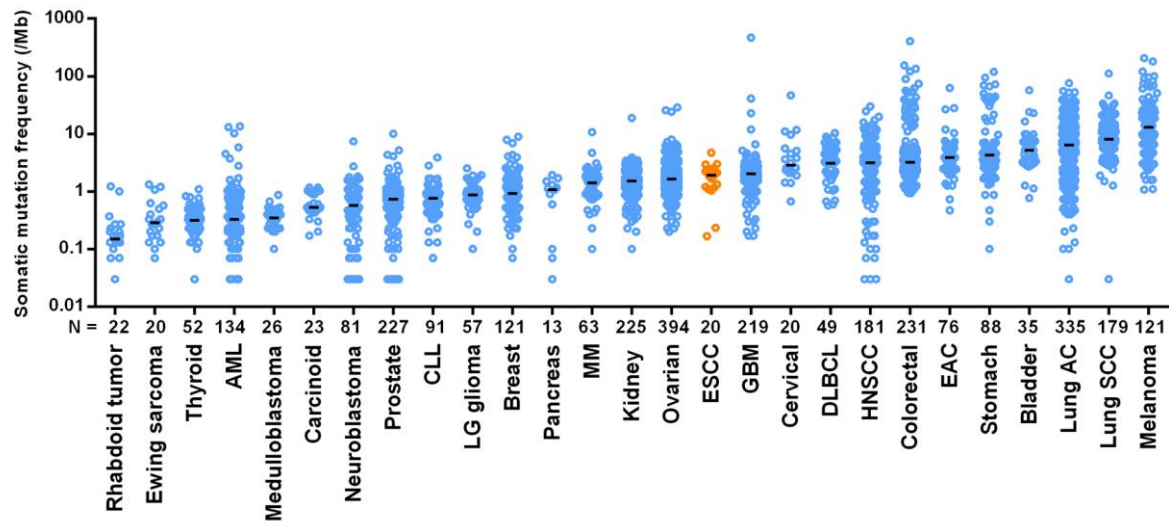

**Supplementary Figure 1. Somatic mutation frequencies detected in exomes from ESCC and other human cancers.**

Each dot represents an examined case (tumor-germline pair), and tumor types are ordered by their median somatic mutation frequencies (indicated by the black dash line). The number beneath X-axis indicates the number of examined cases of each cancer. Except ESCC, all of the other cancers were sequenced and published elsewhere, and their data were re-analyzed by Lawrence *et al*<sup>1</sup>. CLL, chronic lymphocytic leukemia; MM, multiple myeloma; GBM, glioblastoma multiforme; DLBCL, diffuse large B-cell lymphoma; HNSCC, head and neck squamous cell carcinoma; EAC, esophageal adenocarcinoma; Lung AC, lung adenocarcinoma; Lung SCC, lung squamous cell carcinoma.

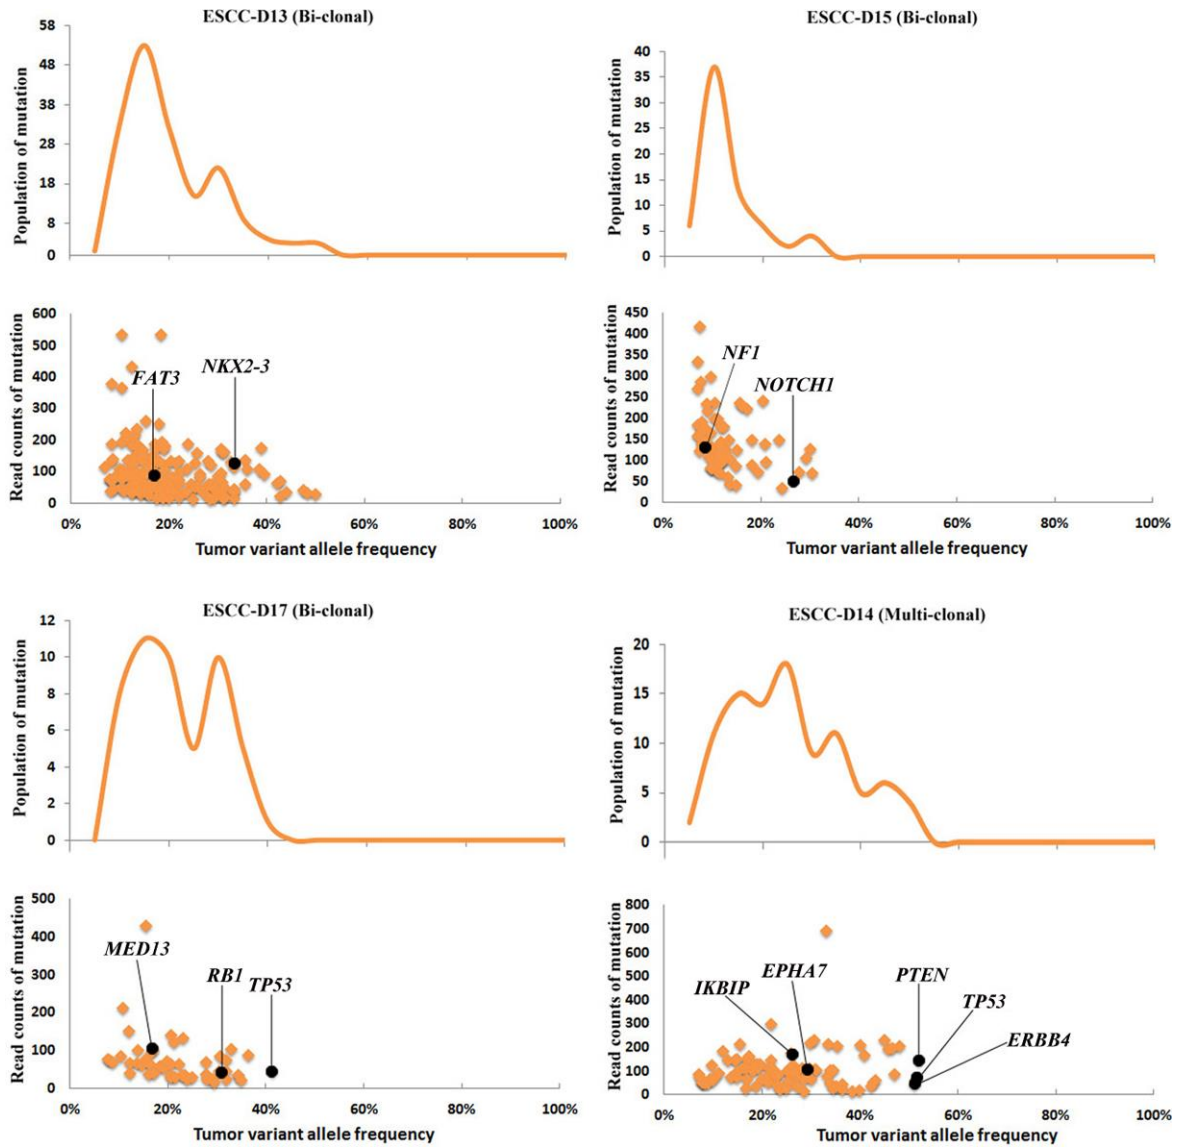

**Supplementary Figure 2. Intratumoral clonality analysis.**

Intratumoral clonality plots of four representative ESCC cases from Discovery Cohort. ESCC-D13, D15, D17 tumors were developed bi-clonally whereas ESCC-D14 tumor showed multi-clonal structure. Variant allele frequency was calculated with copy-number neutral variants, which was further used to plot intratumoral clonal architectures<sup>2-5</sup>.

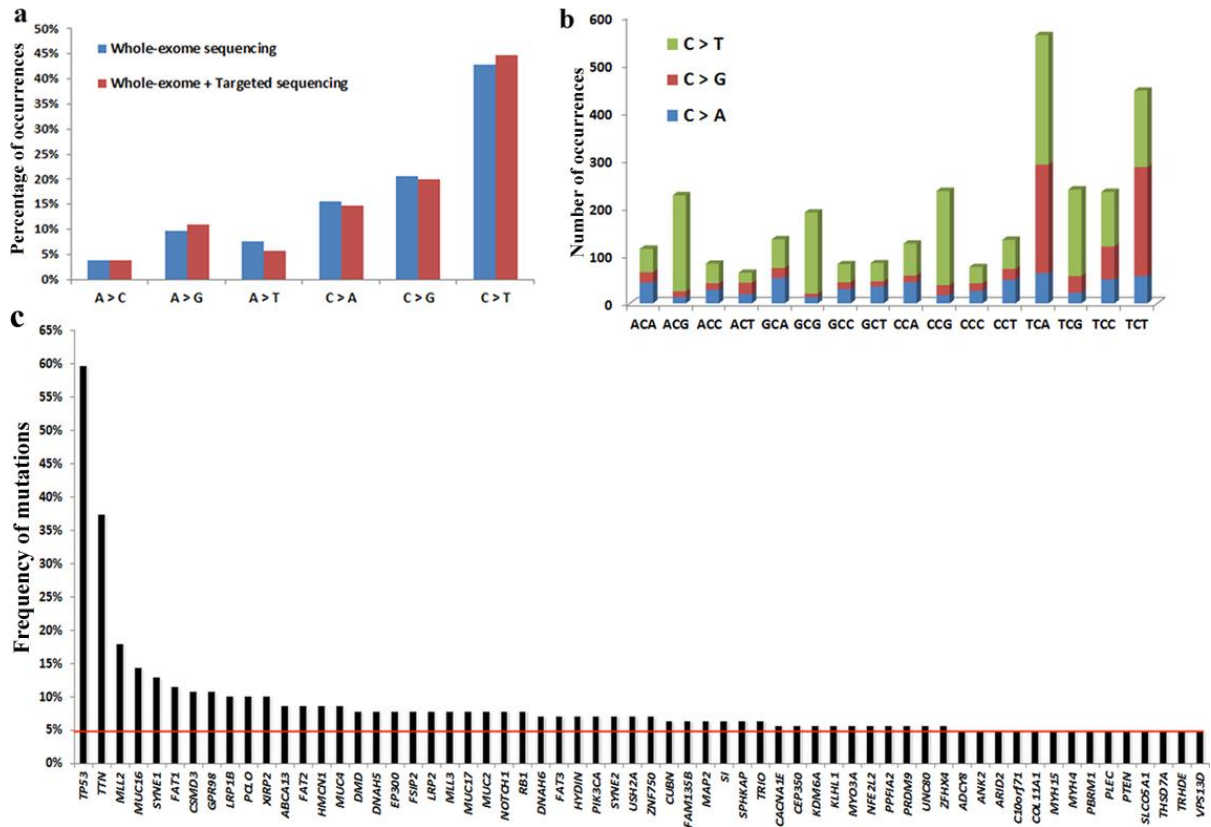

### Supplementary Figure 3. Mutation types and signatures in ESCC

(a) The occurrence of the six types of base-substitution mutations observed in ESCC. (b) The occurrence of cytosine mutations at each group of trinucleotide, which shows biases toward mutations of TCN motifs. (c) Genes mutated in over 5% ( $\geq 7$  cases) of the entire cohort.

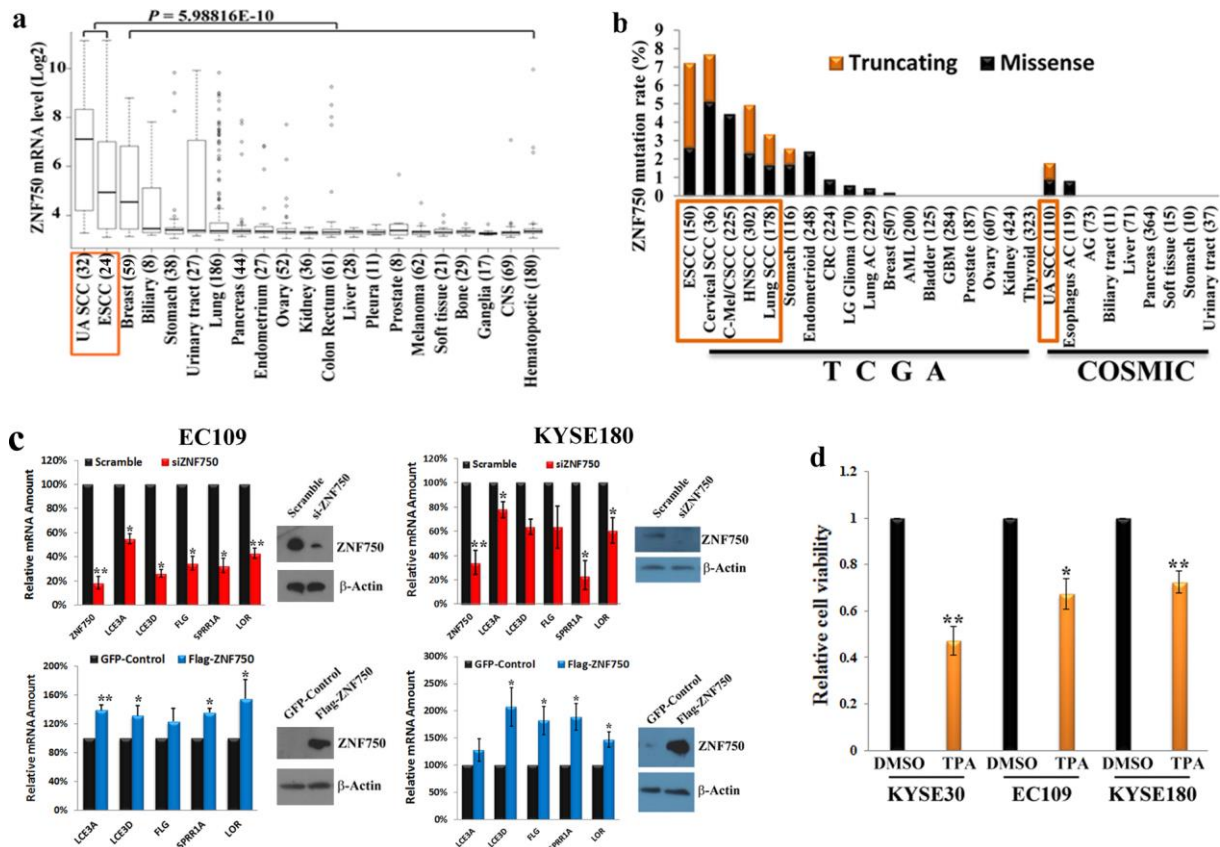

**Supplementary Figure 4. Identification of ZNF750 as a novel recessive cancer gene in ESCC.**

(a) Box plot showing relative ZNF750 mRNA levels in 1019 human cancer cell lines across 21 cancer types analyzed from CCLE database (see URL for the description of Box Plot). Number in the parentheses indicates the number of cell lines analyzed. (b) Summary of somatic mutations affecting *ZNF750* across different tumor types including mutation data reported by The Cancer Genome Atlas (TCGA, see URL) and Catalogue Of Somatic Mutations In Cancer (COSMIC, see URL). Number in the parentheses indicates the number of cases sequenced. Concerning C-Mel/CSCC, in TCGA pathological reports, several cutaneous melanoma (C-Mel) patients with ZNF750 mutations also had cutaneous squamous cell carcinoma (CSCC). UASCC, upper aerodigestive squamous cell carcinoma; HNSCC, head and neck squamous cell carcinoma; CRC, colon and rectum adenocarcinoma; LG Glioma, lower grade glioma; AML, acute myeloid leukemia; GBM, glioblastoma multiforme; AG, autonomic ganglia carcinoma. Squamous cell carcinomas were highlighted with Orange Square. (c) Upper panel, mRNA expression of indicated terminal differentiation-related genes quantified with q-PCR in EC109 and KYSE180 cells transfected with either siRNAs against ZNF750 (siZNF750) or control siRNA (Scramble), as well as (lower panel) infected with lentivirus encoding either of ZNF750 protein (Flag-ZNF750) or GFP (GFP-control). WB results showing ZNF750 protein level in indicated samples.  $\beta$ -Actin was used as a loading control. Value represent mean  $\pm$  SD. N = 5. (d) Short-term cell proliferation assay of ESCC cells treated with control medium (DMSO) or TPA (100nM) for 5 days. N = 3. \*\*,  $P < 0.01$ ; \*,  $P < 0.05$ .

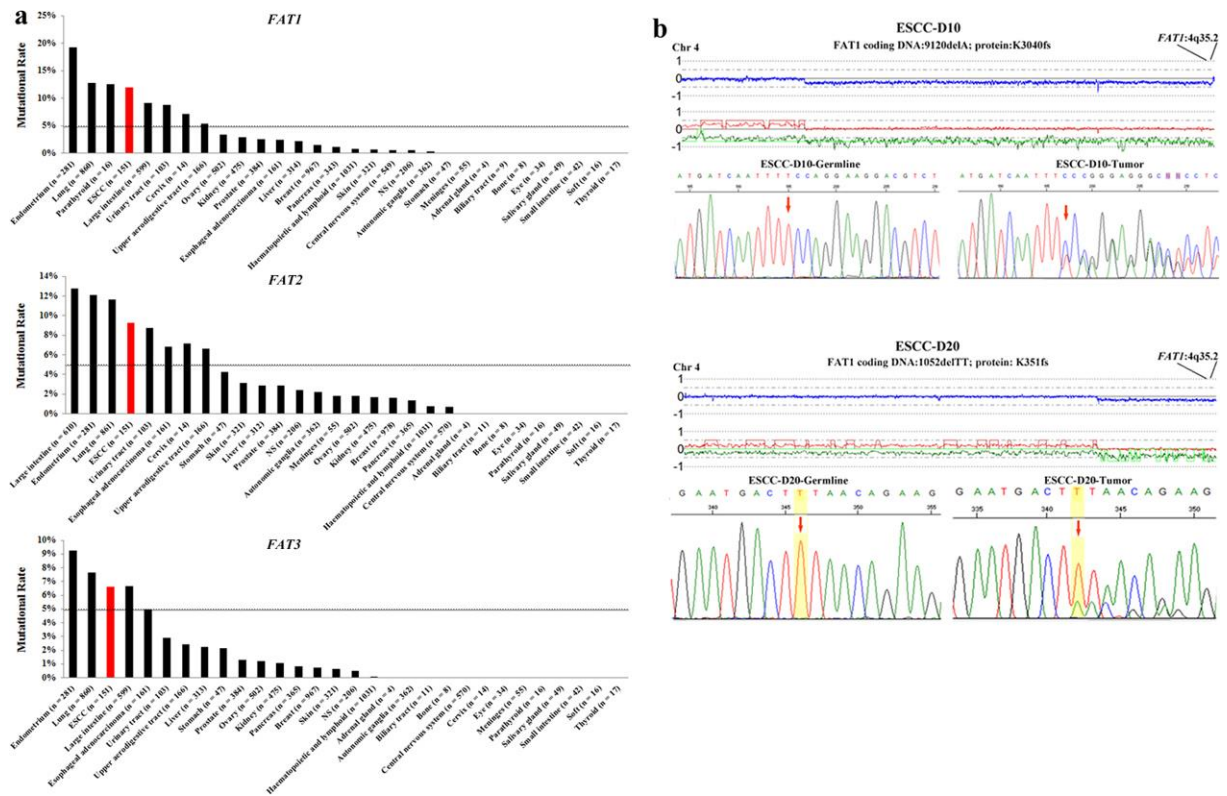

**Supplementary Figure 5. *FAT* gene mutations and loss of heterozygosity.**

(a) Summary of somatic mutations affecting *FAT1*, *FAT2* and *FAT3* across different tumor types from COSMIC. Number in the parentheses indicates the number of cases sequenced. (b) Inactivation of both alleles of *FAT1* in two ESCC cases. Upper panel, SNP-array data showing *FAT1* loss of heterozygosity in both tumors (ESCC-D10 and ESCC-D20, which were from Discovery Cohort). Blue line, total gene dosage; Green and red line, alleles-specific gene dosage. The number on the left indicates  $\log_2$  tumor/reference ratio. Lower panel, Sanger sequencing signals confirmed the somatic mutations of *FAT1* in both cases. Arrows indicate the beginning of frameshift mutation bases in tumor DNA and the corresponding bases in germline DNA.

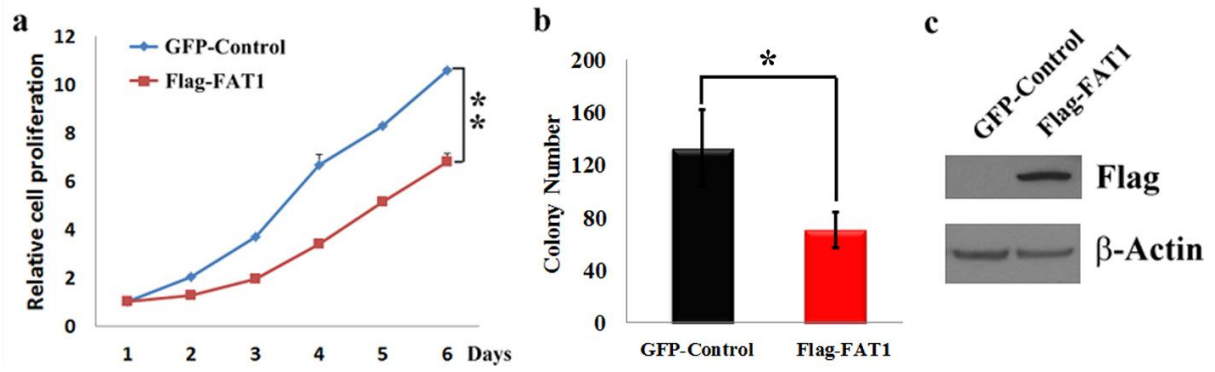

**Supplementary Figure 6. The growth-suppressive properties of FAT1 in ESCC cells.**

KYSE150 cells stably expressing either FAT1 protein (Flag-FAT1) or GFP (GFP-control) were subjected to (a) short-term cell proliferation assay or (b) soft-agar colony formation assay. (c) WB results showing FAT1 protein level.  $\beta$ -Actin was used as a loading control. Value represent mean  $\pm$  SD. N = 3. \*\*,  $P < 0.01$ . \*,  $P < 0.05$ .



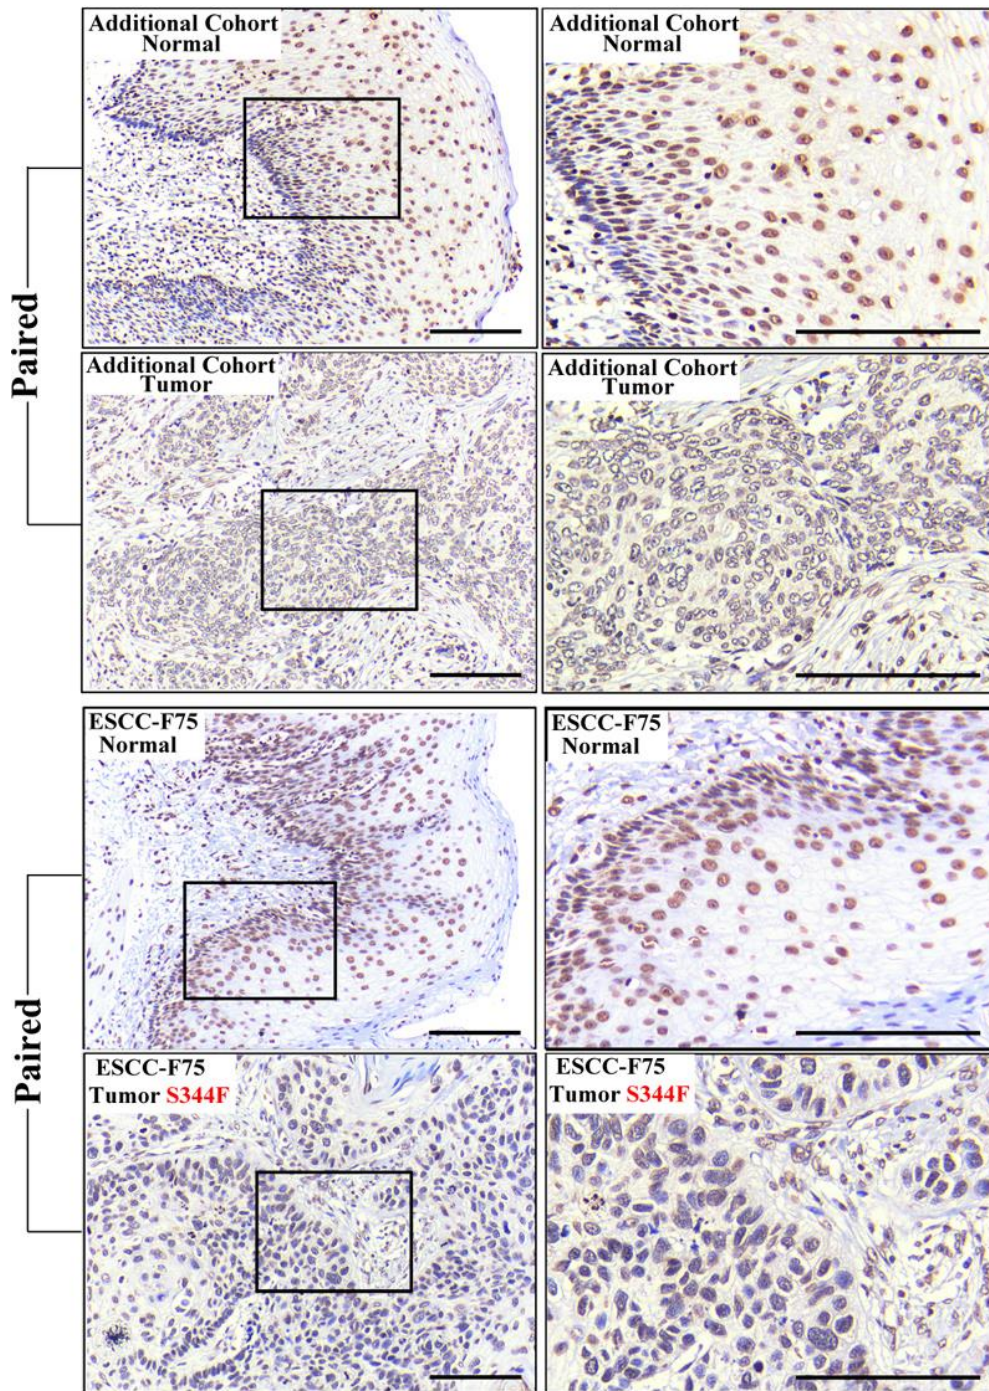

**Supplementary Figure 7. Down-regulation of FBXW7 protein expression in ESCC.**

Representative FBXW7 IHC results of one ESCC case from Additional Cohort (Upper panel) and one ESCC case from Frequency Cohort with *FBXW7* mutation. Scale bars, 200  $\mu$ m.



**Supplementary Tables**

**Supplementary Table 1a. Coverage analysis of whole exome sequencing of 20 ESCCs and matched adjacent normal tissues (Discovery cohort)**

| SAMPLE ID    | SAMPLE TYPE | BAIT_SET   | CAPTURED_REGION | MEAN_TARGET_COVERAGE | TARGET_COVERAGE >20X |
|--------------|-------------|------------|-----------------|----------------------|----------------------|
| ESCC-D1      | Germline    | SureSelect | Whole exome     | 56.706205            | 72.6%                |
| ESCC-D1      | Tumor       | SureSelect | Whole exome     | 57.04133             | 71.0%                |
| ESCC-D2      | Germline    | SureSelect | Whole exome     | 56.749937            | 72.2%                |
| ESCC-D2      | Tumor       | SureSelect | Whole exome     | 57.154523            | 70.5%                |
| ESCC-D3      | Germline    | SureSelect | Whole exome     | 57.238579            | 73.4%                |
| ESCC-D3      | Tumor       | SureSelect | Whole exome     | 56.33882             | 72.3%                |
| ESCC-D4      | Germline    | SureSelect | Whole exome     | 55.983933            | 73.3%                |
| ESCC-D4      | Tumor       | SureSelect | Whole exome     | 55.99643             | 72.1%                |
| ESCC-D5      | Germline    | SureSelect | Whole exome     | 42.24602684          | 66.7%                |
| ESCC-D5      | Tumor       | SureSelect | Whole exome     | 137.3629609          | 85.9%                |
| ESCC-D7      | Germline    | SureSelect | Whole exome     | 159.7336532          | 87.0%                |
| ESCC-D7      | Tumor       | SureSelect | Whole exome     | 133.6128996          | 86.0%                |
| ESCC-D8      | Germline    | SureSelect | Whole exome     | 97.97354477          | 82.7%                |
| ESCC-D8      | Tumor       | SureSelect | Whole exome     | 108.584109           | 83.0%                |
| ESCC-D9      | Germline    | SureSelect | Whole exome     | 111.3162738          | 84.1%                |
| ESCC-D9      | Tumor       | SureSelect | Whole exome     | 47.94066962          | 69.1%                |
| ESCC-D10     | Germline    | SureSelect | Whole exome     | 56.218775            | 73.1%                |
| ESCC-D10     | Tumor       | SureSelect | Whole exome     | 56.8741              | 72.1%                |
| ESCC-D11     | Germline    | SureSelect | Whole exome     | 56.097894            | 72.7%                |
| ESCC-D11     | Tumor       | SureSelect | Whole exome     | 55.854903            | 71.8%                |
| ESCC-D12     | Germline    | SureSelect | Whole exome     | 54.838446            | 71.4%                |
| ESCC-D12     | Tumor       | SureSelect | Whole exome     | 54.762808            | 73.4%                |
| ESCC-D13     | Germline    | SureSelect | Whole exome     | 75.745241            | 81.0%                |
| ESCC-D13     | Tumor       | SureSelect | Whole exome     | 83.696737            | 81.9%                |
| ESCC-D14     | Germline    | SureSelect | Whole exome     | 83.477825            | 82.1%                |
| ESCC-D14     | Tumor       | SureSelect | Whole exome     | 86.419245            | 82.0%                |
| ESCC-D15     | Germline    | SureSelect | Whole exome     | 74.567867            | 80.6%                |
| ESCC-D15     | Tumor       | SureSelect | Whole exome     | 88.063568            | 83.2%                |
| ESCC-D16     | Germline    | SureSelect | Whole exome     | 96.653092            | 84.4%                |
| ESCC-D16     | Tumor       | SureSelect | Whole exome     | 85.651761            | 81.6%                |
| ESCC-D17     | Germline    | SureSelect | Whole exome     | 63.75358             | 76.4%                |
| ESCC-D17     | Tumor       | SureSelect | Whole exome     | 66.82655             | 78.3%                |
| ESCC-D18     | Germline    | SureSelect | Whole exome     | 103.793577           | 85.2%                |
| ESCC-D18     | Tumor       | SureSelect | Whole exome     | 75.509443            | 79.7%                |
| ESCC-D19     | Germline    | SureSelect | Whole exome     | 75.059189            | 82.4%                |
| ESCC-D19     | Tumor       | SureSelect | Whole exome     | 77.704159            | 81.0%                |
| ESCC-D20     | Germline    | SureSelect | Whole exome     | 72.357726            | 81.8%                |
| ESCC-D20     | Tumor       | SureSelect | Whole exome     | 86.315739            | 83.6%                |
| ESCC-D21     | Germline    | SureSelect | Whole exome     | 106.822107           | 87.0%                |
| ESCC-D21     | Tumor       | SureSelect | Whole exome     | 111.150234           | 86.9%                |
| Overall Mean |             |            |                 | 78.50486152          | 78.4%                |

**Supplementary Table 1b. Coverage analysis of targeted sequencing of 119 ESCC and matched adjacent normal tissues (Frequency Cohort)**

| SAMPLE ID | SAMPLE TYPE | BAIT_SET                    | CAPTURED_SIZE (bp) | MEAN_TARGET_COVERAGE | TARGET_COVERAGE >50X | TARGET_COVERAGE >30X |
|-----------|-------------|-----------------------------|--------------------|----------------------|----------------------|----------------------|
| ESCC-1F   | Germline    | SureSelect customized beads | 5309340            | 167.94097            | 86.0%                | 5.5%                 |
| ESCC-1F   | Tumor       | SureSelect customized beads | 5309340            | 101.560193           | 75.8%                | 9.2%                 |
| ESCC-2F   | Germline    | SureSelect customized beads | 5309340            | 97.240714            | 75.7%                | 9.5%                 |
| ESCC-2F   | Tumor       | SureSelect customized beads | 5309340            | 106.850558           | 76.3%                | 8.7%                 |
| ESCC-3F   | Germline    | SureSelect customized beads | 5309340            | 122.553999           | 80.7%                | 7.5%                 |
| ESCC-3F   | Tumor       | SureSelect customized beads | 5309340            | 138.846148           | 81.6%                | 7.0%                 |
| ESCC-4F   | Germline    | SureSelect customized beads | 5309340            | 94.129661            | 74.6%                | 9.4%                 |
| ESCC-4F   | Tumor       | SureSelect customized beads | 5309340            | 107.127278           | 77.4%                | 8.8%                 |
| ESCC-5F   | Germline    | SureSelect customized beads | 5309340            | 142.613228           | 83.5%                | 6.5%                 |
| ESCC-5F   | Tumor       | SureSelect customized beads | 5309340            | 113.559782           | 77.4%                | 8.6%                 |
| ESCC-6F   | Germline    | SureSelect customized beads | 5309340            | 123.153233           | 80.9%                | 7.5%                 |
| ESCC-6F   | Tumor       | SureSelect customized beads | 5309340            | 111.149496           | 78.1%                | 8.1%                 |
| ESCC-7F   | Germline    | SureSelect customized beads | 5309340            | 81.410522            | 71.6%                | 11.1%                |
| ESCC-7F   | Tumor       | SureSelect customized beads | 5309340            | 111.013682           | 77.8%                | 8.3%                 |
| ESCC-8F   | Germline    | SureSelect customized beads | 5309340            | 131.546527           | 81.0%                | 7.2%                 |
| ESCC-8F   | Tumor       | SureSelect customized beads | 5309340            | 104.934557           | 76.7%                | 8.9%                 |
| ESCC-9F   | Germline    | SureSelect customized beads | 5309340            | 115.671711           | 78.0%                | 8.2%                 |
| ESCC-9F   | Tumor       | SureSelect customized beads | 5309340            | 97.257734            | 75.5%                | 9.5%                 |
| ESCC-10F  | Germline    | SureSelect customized beads | 5309340            | 118.272235           | 80.1%                | 7.8%                 |
| ESCC-10F  | Tumor       | SureSelect customized beads | 5309340            | 122.957051           | 80.0%                | 7.6%                 |
| ESCC-11F  | Germline    | SureSelect customized beads | 5309340            | 127.912724           | 81.5%                | 7.2%                 |
| ESCC-11F  | Tumor       | SureSelect customized beads | 5309340            | 80.640921            | 68.2%                | 12.9%                |
| ESCC-12F  | Germline    | SureSelect customized beads | 5309340            | 132.105139           | 82.8%                | 6.9%                 |
| ESCC-12F  | Tumor       | SureSelect customized beads | 5309340            | 94.261754            | 73.9%                | 9.9%                 |
| ESCC-13F  | Germline    | SureSelect customized beads | 5309340            | 96.326951            | 75.0%                | 9.5%                 |
| ESCC-13F  | Tumor       | SureSelect customized beads | 5309340            | 132.972628           | 80.7%                | 7.2%                 |
| ESCC-14F  | Germline    | SureSelect customized beads | 5309340            | 107.744628           | 77.7%                | 8.2%                 |
| ESCC-14F  | Tumor       | SureSelect customized beads | 5309340            | 108.122204           | 77.6%                | 8.6%                 |
| ESCC-15F  | Germline    | SureSelect customized beads | 5309340            | 83.707004            | 72.2%                | 10.3%                |
| ESCC-15F  | Tumor       | SureSelect customized beads | 5309340            | 120.886596           | 80.3%                | 7.4%                 |
| ESCC-16F  | Germline    | SureSelect customized beads | 5309340            | 93.027562            | 74.0%                | 9.5%                 |
| ESCC-16F  | Tumor       | SureSelect customized beads | 5309340            | 130.468624           | 80.8%                | 7.5%                 |
| ESCC-17F  | Germline    | SureSelect customized beads | 5309340            | 105.255465           | 77.3%                | 8.6%                 |
| ESCC-17F  | Tumor       | SureSelect customized beads | 5309340            | 121.059958           | 76.4%                | 8.9%                 |
| ESCC-18F  | Germline    | SureSelect customized beads | 5309340            | 114.083586           | 77.3%                | 7.8%                 |
| ESCC-18F  | Tumor       | SureSelect customized beads | 5309340            | 114.612994           | 76.1%                | 9.3%                 |
| ESCC-19F  | Germline    | SureSelect customized beads | 5309340            | 92.715752            | 74.9%                | 9.3%                 |
| ESCC-19F  | Tumor       | SureSelect customized beads | 5309340            | 120.28216            | 75.7%                | 8.9%                 |
| ESCC-20F  | Germline    | SureSelect customized beads | 5309340            | 81.846994            | 71.3%                | 10.5%                |
| ESCC-20F  | Tumor       | SureSelect customized beads | 5309340            | 114.751555           | 75.7%                | 9.4%                 |
| ESCC-21F  | Germline    | SureSelect customized beads | 5309340            | 102.833068           | 75.7%                | 8.8%                 |
| ESCC-21F  | Tumor       | SureSelect customized beads | 5309340            | 101.687521           | 73.4%                | 10.3%                |
| ESCC-22F  | Germline    | SureSelect customized beads | 5309340            | 76.281992            | 69.7%                | 11.3%                |
| ESCC-22F  | Tumor       | SureSelect customized beads | 5309340            | 117.34441            | 77.1%                | 8.8%                 |
| ESCC-23F  | Germline    | SureSelect customized beads | 5309340            | 72.807438            | 68.2%                | 11.8%                |
| ESCC-23F  | Tumor       | SureSelect customized beads | 5309340            | 109.618205           | 73.2%                | 10.4%                |
| ESCC-24F  | Germline    | SureSelect customized beads | 5309340            | 79.546737            | 69.5%                | 11.2%                |
| ESCC-24F  | Tumor       | SureSelect customized beads | 5309340            | 102.891341           | 73.6%                | 10.1%                |
| ESCC-25F  | Germline    | SureSelect customized beads | 5309340            | 173.875475           | 85.3%                | 5.7%                 |
| ESCC-25F  | Tumor       | SureSelect customized beads | 5309340            | 92.57285             | 70.4%                | 11.4%                |
| ESCC-26F  | Germline    | SureSelect customized beads | 5309340            | 128.021593           | 82.1%                | 7.0%                 |
| ESCC-26F  | Tumor       | SureSelect customized beads | 5309340            | 113.261606           | 76.9%                | 9.0%                 |
| ESCC-27F  | Germline    | SureSelect customized beads | 5309340            | 127.51906            | 81.5%                | 7.3%                 |
| ESCC-27F  | Tumor       | SureSelect customized beads | 5309340            | 83.39498             | 67.3%                | 13.2%                |

|          |          |                             |         |            |       |       |
|----------|----------|-----------------------------|---------|------------|-------|-------|
| ESCC-28F | Germline | SureSelect customized beads | 5309340 | 95.787827  | 75.7% | 9.4%  |
| ESCC-28F | Tumor    | SureSelect customized beads | 5309340 | 94.920553  | 72.0% | 11.2% |
| ESCC-29F | Germline | SureSelect customized beads | 5309340 | 106.564235 | 77.9% | 8.5%  |
| ESCC-29F | Tumor    | SureSelect customized beads | 5309340 | 140.176137 | 81.4% | 7.4%  |
| ESCC-30F | Germline | SureSelect customized beads | 5309340 | 120.022985 | 79.8% | 7.6%  |
| ESCC-30F | Tumor    | SureSelect customized beads | 5309340 | 131.355029 | 75.1% | 9.3%  |
| ESCC-31F | Germline | SureSelect customized beads | 5309340 | 165.603285 | 85.2% | 5.9%  |
| ESCC-31F | Tumor    | SureSelect customized beads | 5309340 | 184.867665 | 84.9% | 5.6%  |
| ESCC-32F | Germline | SureSelect customized beads | 5309340 | 112.180683 | 80.3% | 8.0%  |
| ESCC-32F | Tumor    | SureSelect customized beads | 5309340 | 142.636431 | 79.6% | 7.8%  |
| ESCC-33F | Germline | SureSelect customized beads | 5309340 | 69.379866  | 65.9% | 13.0% |
| ESCC-33F | Tumor    | SureSelect customized beads | 5309340 | 106.199146 | 75.7% | 9.0%  |
| ESCC-34F | Germline | SureSelect customized beads | 5309340 | 94.177054  | 75.8% | 9.1%  |
| ESCC-34F | Tumor    | SureSelect customized beads | 5309340 | 107.036814 | 78.0% | 8.3%  |
| ESCC-35F | Germline | SureSelect customized beads | 5309340 | 73.235987  | 68.0% | 11.7% |
| ESCC-35F | Tumor    | SureSelect customized beads | 5309340 | 137.161007 | 82.6% | 6.8%  |
| ESCC-36F | Germline | SureSelect customized beads | 5309340 | 115.688767 | 80.1% | 7.9%  |
| ESCC-36F | Tumor    | SureSelect customized beads | 5309340 | 133.401424 | 82.2% | 7.0%  |
| ESCC-37F | Germline | SureSelect customized beads | 5309340 | 99.426293  | 75.8% | 9.1%  |
| ESCC-37F | Tumor    | SureSelect customized beads | 5309340 | 73.16158   | 67.4% | 12.4% |
| ESCC-38F | Germline | SureSelect customized beads | 5309340 | 107.242619 | 78.5% | 8.4%  |
| ESCC-38F | Tumor    | SureSelect customized beads | 5309340 | 95.267223  | 73.7% | 10.1% |
| ESCC-39F | Germline | SureSelect customized beads | 5309340 | 138.650878 | 81.7% | 6.9%  |
| ESCC-39F | Tumor    | SureSelect customized beads | 5309340 | 95.427465  | 73.9% | 9.9%  |
| ESCC-40F | Germline | SureSelect customized beads | 5309340 | 117.724501 | 81.3% | 7.3%  |
| ESCC-40F | Tumor    | SureSelect customized beads | 5309340 | 106.695529 | 77.4% | 8.3%  |
| ESCC-41F | Germline | SureSelect customized beads | 5309340 | 137.984908 | 82.0% | 6.9%  |
| ESCC-41F | Tumor    | SureSelect customized beads | 5309340 | 123.473138 | 79.6% | 7.7%  |
| ESCC-42F | Germline | SureSelect customized beads | 5309340 | 147.408199 | 84.4% | 6.1%  |
| ESCC-42F | Tumor    | SureSelect customized beads | 5309340 | 129.503328 | 80.2% | 7.3%  |
| ESCC-43F | Germline | SureSelect customized beads | 5309340 | 114.721959 | 79.8% | 7.8%  |
| ESCC-43F | Tumor    | SureSelect customized beads | 5309340 | 126.664117 | 78.9% | 8.2%  |
| ESCC-44F | Germline | SureSelect customized beads | 5309340 | 114.210782 | 78.3% | 7.8%  |
| ESCC-44F | Tumor    | SureSelect customized beads | 5309340 | 123.614837 | 80.0% | 7.3%  |
| ESCC-45F | Germline | SureSelect customized beads | 5309340 | 138.618918 | 82.0% | 7.0%  |
| ESCC-45F | Tumor    | SureSelect customized beads | 5309340 | 111.752468 | 76.5% | 9.0%  |
| ESCC-46F | Germline | SureSelect customized beads | 5309340 | 128.620052 | 81.2% | 7.0%  |
| ESCC-46F | Tumor    | SureSelect customized beads | 5309340 | 103.942905 | 75.8% | 9.0%  |
| ESCC-47F | Germline | SureSelect customized beads | 5309340 | 140.651126 | 82.9% | 6.7%  |
| ESCC-47F | Tumor    | SureSelect customized beads | 5309340 | 126.421387 | 80.3% | 7.7%  |
| ESCC-48F | Germline | SureSelect customized beads | 5309340 | 139.977073 | 82.3% | 6.8%  |
| ESCC-48F | Tumor    | SureSelect customized beads | 5309340 | 135.157049 | 81.5% | 7.1%  |
| ESCC-49F | Germline | SureSelect customized beads | 5309340 | 116.415326 | 78.4% | 7.9%  |
| ESCC-49F | Tumor    | SureSelect customized beads | 5309340 | 122.827576 | 79.0% | 7.6%  |
| ESCC-50F | Germline | SureSelect customized beads | 5309340 | 101.986263 | 76.0% | 8.9%  |
| ESCC-50F | Tumor    | SureSelect customized beads | 5309340 | 119.675703 | 78.9% | 7.9%  |
| ESCC-51F | Germline | SureSelect customized beads | 5309340 | 76.781876  | 69.2% | 11.7% |
| ESCC-51F | Tumor    | SureSelect customized beads | 5309340 | 90.470599  | 73.6% | 10.2% |
| ESCC-52F | Germline | SureSelect customized beads | 5309340 | 102.678004 | 76.7% | 8.8%  |
| ESCC-52F | Tumor    | SureSelect customized beads | 5309340 | 111.329844 | 77.4% | 8.5%  |
| ESCC-53F | Germline | SureSelect customized beads | 5309340 | 85.519596  | 72.6% | 9.9%  |
| ESCC-53F | Tumor    | SureSelect customized beads | 5309340 | 129.720692 | 79.8% | 7.6%  |
| ESCC-54F | Germline | SureSelect customized beads | 5309340 | 90.386995  | 73.3% | 10.0% |
| ESCC-54F | Tumor    | SureSelect customized beads | 5309340 | 112.204388 | 78.1% | 8.3%  |
| ESCC-55F | Germline | SureSelect customized beads | 5309340 | 89.164374  | 74.9% | 9.6%  |
| ESCC-55F | Tumor    | SureSelect customized beads | 5309340 | 113.603352 | 79.2% | 7.7%  |
| ESCC-56F | Germline | SureSelect customized beads | 5309340 | 93.226176  | 75.4% | 9.1%  |
| ESCC-56F | Tumor    | SureSelect customized beads | 5309340 | 122.280091 | 79.8% | 7.7%  |
| ESCC-57F | Germline | SureSelect customized beads | 5309340 | 106.907203 | 77.7% | 8.2%  |

|          |          |                             |         |            |       |       |
|----------|----------|-----------------------------|---------|------------|-------|-------|
| ESCC-57F | Tumor    | SureSelect customized beads | 5309340 | 97.194811  | 75.1% | 9.4%  |
| ESCC-58F | Germline | SureSelect customized beads | 5309340 | 88.57072   | 73.6% | 10.0% |
| ESCC-58F | Tumor    | SureSelect customized beads | 5309340 | 133.378966 | 80.7% | 7.4%  |
| ESCC-59F | Germline | SureSelect customized beads | 5309340 | 104.408209 | 77.6% | 8.2%  |
| ESCC-59F | Tumor    | SureSelect customized beads | 5309340 | 120.221963 | 79.1% | 7.9%  |
| ESCC-60F | Germline | SureSelect customized beads | 5309340 | 131.601662 | 82.2% | 6.9%  |
| ESCC-60F | Tumor    | SureSelect customized beads | 5309340 | 88.309908  | 73.2% | 10.3% |
| ESCC-61F | Germline | SureSelect customized beads | 5309340 | 123.465359 | 79.8% | 7.7%  |
| ESCC-61F | Tumor    | SureSelect customized beads | 5309340 | 67.421835  | 61.1% | 14.4% |
| ESCC-62F | Germline | SureSelect customized beads | 5309340 | 118.423773 | 79.6% | 7.8%  |
| ESCC-62F | Tumor    | SureSelect customized beads | 5309340 | 82.080252  | 69.2% | 12.1% |
| ESCC-63F | Germline | SureSelect customized beads | 5309340 | 128.101383 | 81.8% | 7.3%  |
| ESCC-63F | Tumor    | SureSelect customized beads | 5309340 | 84.971902  | 69.9% | 11.1% |
| ESCC-64F | Germline | SureSelect customized beads | 5309340 | 106.751737 | 77.6% | 8.7%  |
| ESCC-64F | Tumor    | SureSelect customized beads | 5309340 | 91.07356   | 72.0% | 10.5% |
| ESCC-66F | Germline | SureSelect customized beads | 5309340 | 82.487875  | 72.3% | 11.3% |
| ESCC-66F | Tumor    | SureSelect customized beads | 5309340 | 107.01157  | 76.0% | 9.0%  |
| ESCC-67F | Germline | SureSelect customized beads | 5309340 | 83.531435  | 71.7% | 11.1% |
| ESCC-67F | Tumor    | SureSelect customized beads | 5309340 | 82.304116  | 69.4% | 12.9% |
| ESCC-68F | Germline | SureSelect customized beads | 5309340 | 117.979142 | 79.4% | 7.8%  |
| ESCC-68F | Tumor    | SureSelect customized beads | 5309340 | 112.12291  | 76.2% | 8.8%  |
| ESCC-69F | Germline | SureSelect customized beads | 5309340 | 102.663093 | 76.6% | 8.9%  |
| ESCC-69F | Tumor    | SureSelect customized beads | 5309340 | 126.606042 | 79.1% | 7.8%  |
| ESCC-70F | Germline | SureSelect customized beads | 5309340 | 96.496652  | 75.5% | 9.6%  |
| ESCC-70F | Tumor    | SureSelect customized beads | 5309340 | 91.283867  | 72.7% | 10.2% |
| ESCC-71F | Germline | SureSelect customized beads | 5309340 | 95.325325  | 75.2% | 9.6%  |
| ESCC-71F | Tumor    | SureSelect customized beads | 5309340 | 101.49578  | 73.8% | 9.6%  |
| ESCC-72F | Germline | SureSelect customized beads | 5309340 | 136.866394 | 83.0% | 6.6%  |
| ESCC-72F | Tumor    | SureSelect customized beads | 5309340 | 122.092994 | 79.2% | 8.0%  |
| ESCC-73F | Germline | SureSelect customized beads | 5309340 | 99.377064  | 76.8% | 9.1%  |
| ESCC-73F | Tumor    | SureSelect customized beads | 5309340 | 147.394666 | 82.2% | 6.7%  |
| ESCC-74F | Germline | SureSelect customized beads | 5309340 | 91.378706  | 73.5% | 10.2% |
| ESCC-74F | Tumor    | SureSelect customized beads | 5309340 | 104.764632 | 74.0% | 9.9%  |
| ESCC-75F | Germline | SureSelect customized beads | 5309340 | 88.325922  | 72.6% | 10.5% |
| ESCC-75F | Tumor    | SureSelect customized beads | 5309340 | 109.810481 | 77.6% | 8.9%  |
| ESCC-76F | Germline | SureSelect customized beads | 5309340 | 114.925583 | 79.7% | 8.0%  |
| ESCC-76F | Tumor    | SureSelect customized beads | 5309340 | 97.711636  | 74.5% | 10.1% |
| ESCC-77F | Germline | SureSelect customized beads | 5309340 | 91.97959   | 73.6% | 10.2% |
| ESCC-77F | Tumor    | SureSelect customized beads | 5309340 | 105.245055 | 71.2% | 9.8%  |
| ESCC-78F | Germline | SureSelect customized beads | 5309340 | 115.547991 | 78.9% | 8.2%  |
| ESCC-78F | Tumor    | SureSelect customized beads | 5309340 | 132.803996 | 80.7% | 7.4%  |
| ESCC-79F | Germline | SureSelect customized beads | 5309340 | 117.601421 | 80.5% | 7.9%  |
| ESCC-79F | Tumor    | SureSelect customized beads | 5309340 | 119.674674 | 77.5% | 8.9%  |
| ESCC-80F | Germline | SureSelect customized beads | 5309340 | 108.467174 | 79.2% | 8.1%  |
| ESCC-80F | Tumor    | SureSelect customized beads | 5309340 | 132.733652 | 80.7% | 7.3%  |
| ESCC-81F | Germline | SureSelect customized beads | 5309340 | 146.331066 | 83.7% | 6.5%  |
| ESCC-81F | Tumor    | SureSelect customized beads | 5309340 | 111.177156 | 76.3% | 8.8%  |
| ESCC-82F | Germline | SureSelect customized beads | 5309340 | 161.062252 | 85.0% | 5.8%  |
| ESCC-82F | Tumor    | SureSelect customized beads | 5309340 | 122.820644 | 80.9% | 7.5%  |
| ESCC-83F | Germline | SureSelect customized beads | 5309340 | 135.609606 | 81.8% | 6.8%  |
| ESCC-83F | Tumor    | SureSelect customized beads | 5309340 | 89.250516  | 70.5% | 11.2% |
| ESCC-84F | Germline | SureSelect customized beads | 5309340 | 133.46619  | 81.3% | 7.2%  |
| ESCC-84F | Tumor    | SureSelect customized beads | 5309340 | 100.363858 | 74.9% | 9.8%  |
| ESCC-85F | Germline | SureSelect customized beads | 5309340 | 106.176354 | 77.7% | 8.8%  |
| ESCC-85F | Tumor    | SureSelect customized beads | 5309340 | 120.147932 | 79.7% | 7.9%  |
| ESCC-86F | Germline | SureSelect customized beads | 5309340 | 96.062193  | 73.8% | 9.4%  |
| ESCC-86F | Tumor    | SureSelect customized beads | 5309340 | 120.42735  | 80.0% | 7.7%  |
| ESCC-87F | Germline | SureSelect customized beads | 5309340 | 116.003674 | 80.0% | 8.1%  |
| ESCC-87F | Tumor    | SureSelect customized beads | 5309340 | 109.529329 | 78.5% | 8.9%  |

|           |          |                             |         |            |       |       |
|-----------|----------|-----------------------------|---------|------------|-------|-------|
| ESCC-88F  | Germline | SureSelect customized beads | 5309340 | 116.749701 | 78.2% | 8.2%  |
| ESCC-88F  | Tumor    | SureSelect customized beads | 5309340 | 117.087478 | 79.4% | 8.0%  |
| ESCC-89F  | Germline | SureSelect customized beads | 5309340 | 108.594733 | 77.1% | 8.8%  |
| ESCC-89F  | Tumor    | SureSelect customized beads | 5309340 | 159.534779 | 82.7% | 6.4%  |
| ESCC-90F  | Germline | SureSelect customized beads | 5309340 | 86.760165  | 71.7% | 10.5% |
| ESCC-90F  | Tumor    | SureSelect customized beads | 5309340 | 112.352144 | 79.1% | 8.9%  |
| ESCC-91F  | Germline | SureSelect customized beads | 5309340 | 86.643724  | 71.9% | 10.3% |
| ESCC-91F  | Tumor    | SureSelect customized beads | 5309340 | 111.585036 | 74.1% | 8.7%  |
| ESCC-92F  | Germline | SureSelect customized beads | 5309340 | 89.103173  | 72.8% | 10.4% |
| ESCC-92F  | Tumor    | SureSelect customized beads | 5309340 | 129.727676 | 82.1% | 7.3%  |
| ESCC-93F  | Germline | SureSelect customized beads | 5309340 | 103.342959 | 77.4% | 9.0%  |
| ESCC-93F  | Tumor    | SureSelect customized beads | 5309340 | 122.056926 | 80.1% | 7.9%  |
| ESCC-94F  | Germline | SureSelect customized beads | 5309340 | 101.786876 | 76.9% | 8.9%  |
| ESCC-94F  | Tumor    | SureSelect customized beads | 5309340 | 124.191094 | 77.7% | 8.0%  |
| ESCC-95F  | Germline | SureSelect customized beads | 5309340 | 92.399367  | 74.4% | 9.9%  |
| ESCC-95F  | Tumor    | SureSelect customized beads | 5309340 | 116.263606 | 77.5% | 8.4%  |
| ESCC-96F  | Germline | SureSelect customized beads | 5309340 | 105.806922 | 77.1% | 8.7%  |
| ESCC-96F  | Tumor    | SureSelect customized beads | 5309340 | 118.000643 | 79.8% | 8.0%  |
| ESCC-97F  | Germline | SureSelect customized beads | 5309340 | 116.542169 | 79.1% | 8.1%  |
| ESCC-97F  | Tumor    | SureSelect customized beads | 5309340 | 107.650894 | 77.6% | 9.2%  |
| ESCC-98F  | Germline | SureSelect customized beads | 5309340 | 113.853063 | 79.5% | 8.0%  |
| ESCC-98F  | Tumor    | SureSelect customized beads | 5309340 | 122.25274  | 80.1% | 7.7%  |
| ESCC-99F  | Germline | SureSelect customized beads | 5309340 | 127.529761 | 82.5% | 7.0%  |
| ESCC-99F  | Tumor    | SureSelect customized beads | 5309340 | 133.698501 | 81.5% | 7.2%  |
| ESCC-100F | Germline | SureSelect customized beads | 5309340 | 125.437867 | 81.0% | 7.5%  |
| ESCC-100F | Tumor    | SureSelect customized beads | 5309340 | 94.541856  | 74.0% | 10.4% |
| ESCC-101F | Germline | SureSelect customized beads | 5309340 | 111.777896 | 78.8% | 8.5%  |
| ESCC-101F | Tumor    | SureSelect customized beads | 5309340 | 106.810196 | 77.0% | 8.9%  |
| ESCC-102F | Germline | SureSelect customized beads | 5309340 | 100.331849 | 76.8% | 9.2%  |
| ESCC-102F | Tumor    | SureSelect customized beads | 5309340 | 105.932283 | 78.2% | 8.9%  |
| ESCC-103F | Germline | SureSelect customized beads | 5309340 | 108.858557 | 78.7% | 8.3%  |
| ESCC-103F | Tumor    | SureSelect customized beads | 5309340 | 117.938066 | 79.1% | 8.2%  |
| ESCC-104F | Germline | SureSelect customized beads | 5309340 | 118.939161 | 81.0% | 7.4%  |
| ESCC-104F | Tumor    | SureSelect customized beads | 5309340 | 124.986827 | 80.1% | 7.5%  |
| ESCC-105F | Germline | SureSelect customized beads | 5309340 | 123.435274 | 81.0% | 7.3%  |
| ESCC-105F | Tumor    | SureSelect customized beads | 5309340 | 114.49298  | 78.3% | 8.6%  |
| ESCC-106F | Germline | SureSelect customized beads | 5309340 | 111.481644 | 78.3% | 8.3%  |
| ESCC-106F | Tumor    | SureSelect customized beads | 5309340 | 132.501275 | 81.2% | 7.3%  |
| ESCC-107F | Germline | SureSelect customized beads | 5309340 | 92.39373   | 77.2% | 12.5% |
| ESCC-107F | Tumor    | SureSelect customized beads | 5309340 | 86.204914  | 74.2% | 10.2% |
| ESCC-108F | Germline | SureSelect customized beads | 5309340 | 85.027477  | 74.7% | 13.9% |
| ESCC-108F | Tumor    | SureSelect customized beads | 5309340 | 84.72873   | 73.6% | 10.8% |
| ESCC-109F | Germline | SureSelect customized beads | 5309340 | 83.481489  | 71.5% | 16.3% |
| ESCC-109F | Tumor    | SureSelect customized beads | 5309340 | 69.519999  | 66.5% | 14.2% |
| ESCC-110F | Germline | SureSelect customized beads | 5309340 | 92.35733   | 78.9% | 10.7% |
| ESCC-110F | Tumor    | SureSelect customized beads | 5309340 | 92.598041  | 75.5% | 9.8%  |
| ESCC-111F | Germline | SureSelect customized beads | 5309340 | 104.358876 | 81.0% | 10.0% |
| ESCC-111F | Tumor    | SureSelect customized beads | 5309340 | 96.796975  | 76.3% | 9.6%  |
| ESCC-112F | Germline | SureSelect customized beads | 5309340 | 97.714842  | 79.9% | 10.6% |
| ESCC-112F | Tumor    | SureSelect customized beads | 5309340 | 98.776529  | 77.6% | 9.1%  |
| ESCC-113F | Germline | SureSelect customized beads | 5309340 | 99.172468  | 77.7% | 12.6% |
| ESCC-113F | Tumor    | SureSelect customized beads | 5309340 | 117.191834 | 80.2% | 7.9%  |
| ESCC-114F | Germline | SureSelect customized beads | 5309340 | 141.932835 | 88.8% | 5.3%  |
| ESCC-114F | Tumor    | SureSelect customized beads | 5309340 | 128.839733 | 82.6% | 7.2%  |
| ESCC-115F | Germline | SureSelect customized beads | 5309340 | 124.463706 | 86.1% | 7.0%  |
| ESCC-115F | Tumor    | SureSelect customized beads | 5309340 | 201.330466 | 89.1% | 4.4%  |
| ESCC-116F | Germline | SureSelect customized beads | 5309340 | 104.084617 | 83.0% | 8.9%  |
| ESCC-116F | Tumor    | SureSelect customized beads | 5309340 | 113.292167 | 80.6% | 8.0%  |
| ESCC-117F | Germline | SureSelect customized beads | 5309340 | 100.339516 | 79.3% | 11.2% |



|              |           |                             |         |             |       |       |
|--------------|-----------|-----------------------------|---------|-------------|-------|-------|
| ESCC-117F    | Tumor     | SureSelect customized beads | 5309340 | 111.371605  | 79.5% | 8.3%  |
| ESCC-118F    | Germline  | SureSelect customized beads | 5309340 | 93.809784   | 72.7% | 16.1% |
| ESCC-118F    | Tumor     | SureSelect customized beads | 5309340 | 85.350061   | 73.6% | 11.0% |
| ESCC-119F    | Germline  | SureSelect customized beads | 5309340 | 92.348711   | 78.4% | 10.7% |
| ESCC-119F    | Tumor     | SureSelect customized beads | 5309340 | 183.050516  | 88.3% | 4.9%  |
| ESCC-120F    | Germline  | SureSelect customized beads | 5309340 | 84.255192   | 73.9% | 14.3% |
| ESCC-120F    | Tumor     | SureSelect customized beads | 5309340 | 85.645182   | 72.9% | 11.3% |
| EC109        | Cell line | SureSelect customized beads | 5309340 | 108.526315  | 77.4% | 9.1%  |
| YES2         | Cell line | SureSelect customized beads | 5309340 | 120.864663  | 78.2% | 8.4%  |
| KYSE30       | Cell line | SureSelect customized beads | 5309340 | 120.740092  | 76.8% | 8.5%  |
| KYSE50       | Cell line | SureSelect customized beads | 5309340 | 107.022203  | 76.5% | 9.8%  |
| KYSE70       | Cell line | SureSelect customized beads | 5309340 | 85.8199     | 71.6% | 11.7% |
| KYSE110      | Cell line | SureSelect customized beads | 5309340 | 77.609006   | 67.5% | 12.9% |
| KYSE150      | Cell line | SureSelect customized beads | 5309340 | 86.361148   | 69.2% | 11.3% |
| KYSE180      | Cell line | SureSelect customized beads | 5309340 | 86.040281   | 67.6% | 11.7% |
| KYSE450      | Cell line | SureSelect customized beads | 5309340 | 73.670885   | 64.1% | 14.0% |
| KYSE510      | Cell line | SureSelect customized beads | 5309340 | 94.426648   | 72.7% | 10.6% |
| Overall mean |           |                             |         | 110.7219112 | 77.2% | 8.9%  |

**Supplementary Table 2a. Clinical parameters of 20 ESCC cases analyzed with whole exome sequencing (Discovery Cohort)**

| Sample ID | Gender | Age  | Pathological Type       | Primary Tumor Size | Regional Lymph nodes | Tumor Differentiation |
|-----------|--------|------|-------------------------|--------------------|----------------------|-----------------------|
| ESCC-D1   | Male   | 68   | Squamous cell carcinoma | T3                 | N0                   | Poor                  |
| ESCC-D2   | Female | 67   | Squamous cell carcinoma | T3                 | N0                   | Well                  |
| ESCC-D3   | Male   | 66   | Squamous cell carcinoma | T2                 | N0                   | Middle                |
| ESCC-D4   | Female | 61   | Squamous cell carcinoma | T2                 | N0                   | Well                  |
| ESCC-D5   | Male   | 49   | Squamous cell carcinoma | T3                 | N0                   | Well                  |
| ESCC-D7   | Female | N.D. | Squamous cell carcinoma | T2                 | N0                   | Middle                |
| ESCC-D8   | Male   | 66   | Squamous cell carcinoma | T3                 | N1                   | Middle                |
| ESCC-D9   | Male   | 34   | Squamous cell carcinoma | T3                 | N1                   | Middle                |
| ESCC-D10  | Male   | 62   | Squamous cell carcinoma | T3                 | N1                   | Poor                  |
| ESCC-D11  | Male   | 66   | Squamous cell carcinoma | T3                 | N1                   | Poor                  |
| ESCC-D12  | Male   | 57   | Squamous cell carcinoma | T2                 | N1                   | Middle                |
| ESCC-D13  | Male   | 50   | Squamous cell carcinoma | T3                 | N1                   | Middle                |
| ESCC-D14  | Male   | 58   | Squamous cell carcinoma | T3                 | N0                   | Middle                |
| ESCC-D15  | Male   | 76   | Squamous cell carcinoma | T3                 | N0                   | Well                  |
| ESCC-D16  | Male   | 55   | Squamous cell carcinoma | T3                 | N1                   | Middle                |
| ESCC-D17  | Male   | 44   | Squamous cell carcinoma | T3                 | N0                   | Middle                |
| ESCC-D18  | Male   | N.D. | Squamous cell carcinoma | T3                 | N1                   | Middle                |
| ESCC-D19  | Male   | 47   | Squamous cell carcinoma | T3                 | N1                   | Middle                |
| ESCC-D20  | Male   | 70   | Squamous cell carcinoma | T3                 | N0                   | Well                  |
| ESCC-D21  | Female | 77   | Squamous cell carcinoma | T3                 | N1                   | Poor                  |

N.D., No data available.

**Supplementary Table 2b. Clinical parameters of 119 ESCC cases analyzed with targeted sequencing (Frequency Cohort)**

| Sample ID | Gender | Age | Pathological Type       | Primary Tumor Size | Regional lymph nodes | Tumor Differentiation |
|-----------|--------|-----|-------------------------|--------------------|----------------------|-----------------------|
| ESCC-F1   | Male   | 64  | Squamous cell carcinoma | T3                 | N0                   | Middle                |
| ESCC-F2   | Male   | 69  | Squamous cell carcinoma | T3                 | N0                   | Well                  |
| ESCC-F3   | Male   | 56  | Squamous cell carcinoma | T2                 | N0                   | Middle                |
| ESCC-F4   | Female | 59  | Squamous cell carcinoma | T3                 | N1                   | Middle                |
| ESCC-F5   | Male   | 40  | Squamous cell carcinoma | T3                 | N1                   | Well                  |
| ESCC-F6   | Male   | 62  | Squamous cell carcinoma | T3                 | N1                   | Middle                |
| ESCC-F7   | Male   | 54  | Squamous cell carcinoma | T3                 | N1                   | Middle                |
| ESCC-F8   | Male   | 62  | Squamous cell carcinoma | T3                 | N1                   | Middle                |
| ESCC-F9   | Male   | 70  | Squamous cell carcinoma | T3                 | N0                   | Middle                |
| ESCC-F10  | Male   | 58  | Squamous cell carcinoma | T3                 | N0                   | Middle                |
| ESCC-F11  | Male   | 57  | Squamous cell carcinoma | T3                 | N0                   | Poor                  |
| ESCC-F12  | Male   | 80  | Squamous cell carcinoma | T3                 | N0                   | Middle                |
| ESCC-F13  | Male   | 52  | Squamous cell carcinoma | T3                 | N1                   | Middle                |
| ESCC-F14  | Female | 65  | Squamous cell carcinoma | T3                 | N1                   | Middle                |
| ESCC-F15  | Female | 76  | Squamous cell carcinoma | T3                 | N1                   | Well                  |
| ESCC-F16  | Male   | 59  | Squamous cell carcinoma | T3                 | N1                   | Poor                  |
| ESCC-F17  | Male   | 65  | Squamous cell carcinoma | T3                 | N1                   | Poor                  |
| ESCC-F18  | Female | 62  | Squamous cell carcinoma | T3                 | N1                   | Poor                  |
| ESCC-F19  | Female | 68  | Squamous cell carcinoma | T3                 | N1                   | Middle                |
| ESCC-F20  | Female | 53  | Squamous cell carcinoma | T3                 | N1                   | Middle                |
| ESCC-F21  | Male   | 59  | Squamous cell carcinoma | T3                 | N1                   | Poor                  |
| ESCC-F22  | Female | 69  | Squamous cell carcinoma | T3                 | N0                   | Well                  |
| ESCC-F23  | Female | 71  | Squamous cell carcinoma | T3                 | N1                   | Poor                  |
| ESCC-F24  | Male   | 61  | Squamous cell carcinoma | T3                 | N1                   | Middle                |
| ESCC-F25  | Male   | 60  | Squamous cell carcinoma | T3                 | N1                   | Poor                  |
| ESCC-F26  | Female | 57  | Squamous cell carcinoma | T3                 | N0                   | Middle                |
| ESCC-F27  | Male   | 71  | Squamous cell carcinoma | T3                 | N1                   | Poor                  |
| ESCC-F28  | Male   | 48  | Squamous cell carcinoma | T3                 | N0                   | Middle                |
| ESCC-F29  | Male   | 54  | Squamous cell carcinoma | T3                 | N1                   | Middle                |
| ESCC-F30  | Male   | 71  | Squamous cell carcinoma | T2                 | N0                   | Poor                  |
| ESCC-F31  | Male   | 51  | Squamous cell carcinoma | T3                 | N1                   | Middle                |
| ESCC-F32  | Male   | 65  | Squamous cell carcinoma | T3                 | N1                   | Middle                |
| ESCC-F33  | Male   | 52  | Squamous cell carcinoma | T3                 | N1                   | Middle                |
| ESCC-F34  | Female | 62  | Squamous cell carcinoma | T3                 | N0                   | Well                  |
| ESCC-F35  | Female | 63  | Squamous cell carcinoma | T3                 | N1                   | Middle                |
| ESCC-F36  | Male   | 66  | Squamous cell carcinoma | T3                 | N1                   | Middle                |
| ESCC-F37  | Male   | 61  | Squamous cell carcinoma | T3                 | N0                   | Middle                |
| ESCC-F38  | Male   | 60  | Squamous cell carcinoma | T2                 | N0                   | Poor                  |
| ESCC-F39  | Male   | 44  | Squamous cell carcinoma | T3                 | N0                   | Well                  |
| ESCC-F40  | Female | 70  | Squamous cell carcinoma | T2                 | N1                   | Middle                |
| ESCC-F41  | Male   | 66  | Squamous cell carcinoma | T3                 | N0                   | Middle                |
| ESCC-F42  | Female | 51  | Squamous cell carcinoma | T3                 | N1                   | Middle                |
| ESCC-F43  | Male   | 73  | Squamous cell carcinoma | T3                 | N1                   | Poor                  |
| ESCC-F44  | Female | 54  | Squamous cell carcinoma | T3                 | N0                   | Middle                |
| ESCC-F45  | Male   | 70  | Squamous cell carcinoma | T3                 | N1                   | Middle                |
| ESCC-F46  | Female | 73  | Squamous cell carcinoma | T2                 | N1                   | Middle                |
| ESCC-F47  | Male   | 41  | Squamous cell carcinoma | T3                 | N1                   | Middle                |
| ESCC-F48  | Male   | 66  | Squamous cell carcinoma | T3                 | N1                   | Middle                |
| ESCC-F49  | Male   | 68  | Squamous cell carcinoma | T2                 | N1                   | Middle                |
| ESCC-F50  | Male   | 57  | Squamous cell carcinoma | T3                 | N1                   | Middle                |
| ESCC-F51  | Male   | 57  | Squamous cell carcinoma | T3                 | N1                   | Middle                |
| ESCC-F52  | Male   | 67  | Squamous cell carcinoma | T2                 | N0                   | Middle                |
| ESCC-F53  | Male   | 60  | Squamous cell carcinoma | T3                 | N0                   | Poor                  |
| ESCC-F54  | Male   | 70  | Squamous cell carcinoma | T3                 | N0                   | Middle                |
| ESCC-F55  | Female | 68  | Squamous cell carcinoma | T3                 | N1                   | Poor                  |

|           |        |    |                         |      |      |        |
|-----------|--------|----|-------------------------|------|------|--------|
| ESCC-F56  | Female | 57 | Squamous cell carcinoma | T3   | N1   | Middle |
| ESCC-F57  | Female | 61 | Squamous cell carcinoma | T1   | N0   | Middle |
| ESCC-F58  | Male   | 73 | Squamous cell carcinoma | T3   | N1   | Middle |
| ESCC-F59  | Female | 60 | Squamous cell carcinoma | T3   | N1   | Middle |
| ESCC-F60  | Male   | 61 | Squamous cell carcinoma | T2   | N1   | Poor   |
| ESCC-F61  | Male   | 48 | Squamous cell carcinoma | T2   | N1   | Middle |
| ESCC-F62  | Male   | 49 | Squamous cell carcinoma | T2   | N0   | Well   |
| ESCC-F63  | Male   | 59 | Squamous cell carcinoma | T3   | N1   | Middle |
| ESCC-F64  | Male   | 57 | Squamous cell carcinoma | T3   | N0   | Middle |
| ESCC-F66  | Male   | 52 | Squamous cell carcinoma | T3   | N1   | Middle |
| ESCC-F67  | Male   | 74 | Squamous cell carcinoma | T3   | N0   | Poor   |
| ESCC-F68  | Male   | 71 | Squamous cell carcinoma | T3   | N1   | Middle |
| ESCC-F69  | Male   | 63 | Squamous cell carcinoma | T2   | N1   | Poor   |
| ESCC-F70  | Male   | 54 | Squamous cell carcinoma | T2   | N1   | Well   |
| ESCC-F71  | Male   | 59 | Squamous cell carcinoma | T3   | N1   | Poor   |
| ESCC-F72  | Female | 63 | Squamous cell carcinoma | T3   | N0   | Well   |
| ESCC-F73  | Female | 67 | Squamous cell carcinoma | T3   | N0   | Poor   |
| ESCC-F74  | Male   | 62 | Squamous cell carcinoma | T3   | N0   | Poor   |
| ESCC-F75  | Male   | 60 | Squamous cell carcinoma | T3   | N0   | Well   |
| ESCC-F76  | Male   | 75 | Squamous cell carcinoma | T3   | N1   | Poor   |
| ESCC-F77  | Male   | 65 | Squamous cell carcinoma | T3   | N1   | Poor   |
| ESCC-F78  | Male   | 49 | Squamous cell carcinoma | T3   | N0   | Middle |
| ESCC-F79  | Male   | 49 | Squamous cell carcinoma | T3   | N0   | Poor   |
| ESCC-F80  | Female | 61 | Squamous cell carcinoma | T3   | N1   | Middle |
| ESCC-F81  | Male   | 75 | Squamous cell carcinoma | T3   | N0   | Poor   |
| ESCC-F82  | Female | 54 | Squamous cell carcinoma | T3   | N1   | Middle |
| ESCC-F83  | Male   | 60 | Squamous cell carcinoma | T3   | N1   | Poor   |
| ESCC-F84  | Male   | 62 | Squamous cell carcinoma | T3   | N0   | Well   |
| ESCC-F85  | Male   | 66 | Squamous cell carcinoma | T3   | N1   | Middle |
| ESCC-F86  | Female | 65 | Squamous cell carcinoma | T3   | N1   | Well   |
| ESCC-F87  | Male   | 54 | Squamous cell carcinoma | T3   | N0   | Well   |
| ESCC-F88  | Male   | 62 | Squamous cell carcinoma | T3   | N1   | Poor   |
| ESCC-F89  | Male   | 62 | Squamous cell carcinoma | N.D. | N.D. | N.D.   |
| ESCC-F90  | Male   | 68 | Squamous cell carcinoma | T3   | N1   | Poor   |
| ESCC-F91  | Female | 66 | Squamous cell carcinoma | T3   | N1   | Poor   |
| ESCC-F92  | Male   | 52 | Squamous cell carcinoma | T3   | N1   | Middle |
| ESCC-F93  | Male   | 58 | Squamous cell carcinoma | T3   | N1   | Middle |
| ESCC-F94  | Male   | 62 | Squamous cell carcinoma | T3   | N1   | Poor   |
| ESCC-F95  | Male   | 75 | Squamous cell carcinoma | T3   | N0   | Middle |
| ESCC-F96  | Male   | 56 | Squamous cell carcinoma | T3   | N0   | Well   |
| ESCC-F97  | Male   | 59 | Squamous cell carcinoma | T3   | N0   | Well   |
| ESCC-F98  | Female | 66 | Squamous cell carcinoma | T3   | N1   | Middle |
| ESCC-F99  | Female | 74 | Squamous cell carcinoma | T3   | N0   | Middle |
| ESCC-F100 | Male   | 64 | Squamous cell carcinoma | T3   | N1   | Middle |
| ESCC-F101 | Male   | 57 | Squamous cell carcinoma | T3   | N1   | Well   |
| ESCC-F102 | Male   | 58 | Squamous cell carcinoma | T3   | N1   | Poor   |
| ESCC-F103 | Male   | 43 | Squamous cell carcinoma | T2   | N1   | Well   |
| ESCC-F104 | Female | 63 | Squamous cell carcinoma | T3   | N0   | Middle |
| ESCC-F105 | Male   | 62 | Squamous cell carcinoma | T3   | N1   | Middle |
| ESCC-F106 | Male   | 78 | Squamous cell carcinoma | T3   | N0   | Middle |
| ESCC-F107 | Female | 48 | Squamous cell carcinoma | T3   | N0   | Middle |
| ESCC-F108 | Male   | 66 | Squamous cell carcinoma | T2   | N0   | Middle |
| ESCC-F109 | Male   | 63 | Squamous cell carcinoma | T3   | N1   | Middle |
| ESCC-F110 | Male   | 60 | Squamous cell carcinoma | T3   | N0   | Middle |
| ESCC-F111 | Male   | 64 | Squamous cell carcinoma | T2   | N0   | Middle |
| ESCC-F112 | Male   | 57 | Squamous cell carcinoma | T3   | N0   | Poor   |
| ESCC-F113 | Male   | 65 | Squamous cell carcinoma | T2   | N0   | Middle |
| ESCC-F114 | Male   | 66 | Squamous cell carcinoma | T3   | N1   | Poor   |
| ESCC-F115 | Male   | 74 | Squamous cell carcinoma | T3   | N1   | Middle |

|           |      |    |                         |    |    |        |
|-----------|------|----|-------------------------|----|----|--------|
| ESCC-F116 | Male | 54 | Squamous cell carcinoma | T3 | N1 | Middle |
| ESCC-F117 | Male | 61 | Squamous cell carcinoma | T1 | N0 | Middle |
| ESCC-F118 | Male | 57 | Squamous cell carcinoma | T3 | N0 | Poor   |
| ESCC-F119 | Male | 68 | Squamous cell carcinoma | T3 | N1 | Middle |
| ESCC-F120 | Male | 59 | Squamous cell carcinoma | T3 | N1 | Middle |

N.D., No data available.



**Supplementary Table 2c. Clinical parameters of 172 ESCC cases analyzed with immunohistochemistry (Additional Cohort)**

| Sample ID  | Gender | Age  | Pathological Type       | Tumor Differentiation | Primary Tumor Size | Regional lymph nodes |
|------------|--------|------|-------------------------|-----------------------|--------------------|----------------------|
| ESCC-AC-1  | Female | 65   | Squamous cell carcinoma | Middle                | T3                 | N0                   |
| ESCC-AC-2  | Female | 60   | Squamous cell carcinoma | Middle                | T3                 | N0                   |
| ESCC-AC-3  | Female | 64   | Squamous cell carcinoma | Middle                | T3                 | N0                   |
| ESCC-AC-4  | Female | 67   | Squamous cell carcinoma | Middle                | T2                 | N1                   |
| ESCC-AC-5  | Female | 63   | Squamous cell carcinoma | Middle                | T3                 | N0                   |
| ESCC-AC-6  | Female | 68   | Squamous cell carcinoma | Middle                | T2                 | N.D.                 |
| ESCC-AC-7  | Female | 56   | Squamous cell carcinoma | Middle                | T3                 | N1                   |
| ESCC-AC-8  | Female | 78   | Squamous cell carcinoma | Middle                | T2                 | N0                   |
| ESCC-AC-9  | Female | 61   | Squamous cell carcinoma | Middle                | T3                 | N1                   |
| ESCC-AC-10 | Male   | 60   | Squamous cell carcinoma | Middle                | T3                 | N1                   |
| ESCC-AC-11 | Male   | 53   | Squamous cell carcinoma | Middle                | T2                 | N0                   |
| ESCC-AC-12 | Male   | 60   | Squamous cell carcinoma | Middle                | T3                 | N1                   |
| ESCC-AC-13 | Male   | 75   | Squamous cell carcinoma | Middle                | T3                 | N1                   |
| ESCC-AC-14 | Male   | 62   | Squamous cell carcinoma | Middle                | T3                 | N1                   |
| ESCC-AC-15 | Male   | 38   | Squamous cell carcinoma | Middle                | T3                 | N0                   |
| ESCC-AC-16 | Male   | 73   | Squamous cell carcinoma | Middle                | T2                 | N0                   |
| ESCC-AC-17 | Male   | 63   | Squamous cell carcinoma | Middle                | T3                 | N1                   |
| ESCC-AC-18 | Male   | 60   | Squamous cell carcinoma | Middle                | T1                 | N0                   |
| ESCC-AC-19 | Male   | 74   | Squamous cell carcinoma | Middle                | T2                 | N0                   |
| ESCC-AC-20 | Male   | 66   | Squamous cell carcinoma | Middle                | T2                 | N0                   |
| ESCC-AC-21 | Male   | 74   | Squamous cell carcinoma | Middle                | T2                 | N0                   |
| ESCC-AC-22 | Male   | 41   | Squamous cell carcinoma | Middle                | T3                 | N1                   |
| ESCC-AC-23 | Male   | 57   | Squamous cell carcinoma | Middle                | T3                 | N0                   |
| ESCC-AC-24 | Male   | 55   | Squamous cell carcinoma | Middle                | T2                 | N1                   |
| ESCC-AC-25 | Male   | 43   | Squamous cell carcinoma | Middle                | T2                 | N0                   |
| ESCC-AC-26 | Male   | 74   | Squamous cell carcinoma | Middle                | T2                 | N0                   |
| ESCC-AC-27 | Female | 62   | Squamous cell carcinoma | Poor                  | T3                 | N1                   |
| ESCC-AC-28 | Female | 60   | Squamous cell carcinoma | Poor                  | T2                 | N1                   |
| ESCC-AC-29 | Male   | 67   | Squamous cell carcinoma | Poor                  | T3                 | N1                   |
| ESCC-AC-30 | Male   | 51   | Squamous cell carcinoma | Poor                  | T2                 | N1                   |
| ESCC-AC-31 | Male   | 62   | Squamous cell carcinoma | Poor                  | T2                 | N1                   |
| ESCC-AC-32 | Male   | 77   | Squamous cell carcinoma | Poor                  | T3                 | N1                   |
| ESCC-AC-33 | Male   | 56   | Squamous cell carcinoma | Poor                  | T3                 | N.D.                 |
| ESCC-AC-34 | Female | 59   | Squamous cell carcinoma | Well                  | T3                 | N0                   |
| ESCC-AC-35 | Female | 51   | Squamous cell carcinoma | Well                  | T3                 | N0                   |
| ESCC-AC-36 | Female | 61   | Squamous cell carcinoma | Well                  | T2                 | N0                   |
| ESCC-AC-37 | Female | 57   | Squamous cell carcinoma | Well                  | T3                 | N1                   |
| ESCC-AC-38 | Female | 60   | Squamous cell carcinoma | Well                  | T2                 | N0                   |
| ESCC-AC-39 | Female | 64   | Squamous cell carcinoma | Well                  | T3                 | N.D.                 |
| ESCC-AC-40 | Female | 54   | Squamous cell carcinoma | Well                  | T2                 | N0                   |
| ESCC-AC-41 | Female | 67   | Squamous cell carcinoma | Well                  | T2                 | N1                   |
| ESCC-AC-42 | Female | 62   | Squamous cell carcinoma | Well                  | T2                 | N0                   |
| ESCC-AC-43 | Male   | 63   | Squamous cell carcinoma | Well                  | T3                 | N0                   |
| ESCC-AC-44 | Male   | 70   | Squamous cell carcinoma | Well                  | T2                 | N1                   |
| ESCC-AC-45 | Male   | 64   | Squamous cell carcinoma | Well                  | T2                 | N1                   |
| ESCC-AC-46 | Male   | 64   | Squamous cell carcinoma | Well                  | T3                 | N0                   |
| ESCC-AC-47 | Male   | 50   | Squamous cell carcinoma | Well                  | T2                 | N0                   |
| ESCC-AC-48 | Male   | 71   | Squamous cell carcinoma | Well                  | T2                 | N0                   |
| ESCC-AC-49 | N.D.   | N.D. | Squamous cell carcinoma | N.D.                  | N.D.               | N.D.                 |
| ESCC-AC-50 | Male   | 43   | Squamous cell carcinoma | Well                  | T2                 | N0                   |
| ESCC-AC-51 | Male   | 62   | Squamous cell carcinoma | Well                  | T2                 | N0                   |
| ESCC-AC-52 | Male   | 71   | Squamous cell carcinoma | Well                  | T2                 | N0                   |
| ESCC-AC-53 | Male   | 50   | Squamous cell carcinoma | Well                  | T2                 | N0                   |
| ESCC-AC-54 | Male   | 64   | Squamous cell carcinoma | Well                  | T2                 | N0                   |
| ESCC-AC-55 | Male   | 65   | Squamous cell carcinoma | Well                  | T2                 | N0                   |

|             |        |    |                         |        |    |    |
|-------------|--------|----|-------------------------|--------|----|----|
| ESCC-AC-56  | Male   | 60 | Squamous cell carcinoma | Well   | T2 | N0 |
| ESCC-AC-57  | Male   | 60 | Squamous cell carcinoma | Well   | T2 | N0 |
| ESCC-AC-58  | Male   | 66 | Squamous cell carcinoma | Well   | T2 | N0 |
| ESCC-AC-59  | Male   | 62 | Squamous cell carcinoma | Well   | T2 | N0 |
| ESCC-AC-60  | Male   | 70 | Squamous cell carcinoma | Well   | T2 | N0 |
| ESCC-AC-61  | Male   | 64 | Squamous cell carcinoma | Well   | T2 | N0 |
| ESCC-AC-62  | Male   | 85 | Squamous cell carcinoma | Well   | T2 | N0 |
| ESCC-AC-63  | Male   | 61 | Squamous cell carcinoma | Well   | T2 | N0 |
| ESCC-AC-64  | Male   | 56 | Squamous cell carcinoma | Well   | T2 | N0 |
| ESCC-AC-65  | Male   | 65 | Squamous cell carcinoma | Well   | T2 | N0 |
| ESCC-AC-66  | Male   | 59 | Squamous cell carcinoma | Well   | T2 | N0 |
| ESCC-AC-67  | Male   | 59 | Squamous cell carcinoma | Well   | T2 | N0 |
| ESCC-AC-68  | Male   | 52 | Squamous cell carcinoma | Well   | T2 | N0 |
| ESCC-AC-69  | Male   | 46 | Squamous cell carcinoma | Well   | T2 | N0 |
| ESCC-AC-70  | Male   | 64 | Squamous cell carcinoma | Well   | T2 | N0 |
| ESCC-AC-71  | Female | 54 | Squamous cell carcinoma | Well   | T2 | N0 |
| ESCC-AC-72  | Female | 57 | Squamous cell carcinoma | Well   | T2 | N0 |
| ESCC-AC-73  | Female | 69 | Squamous cell carcinoma | Well   | T2 | N0 |
| ESCC-AC-74  | Female | 61 | Squamous cell carcinoma | Well   | T2 | N0 |
| ESCC-AC-75  | Female | 64 | Squamous cell carcinoma | Well   | T2 | N0 |
| ESCC-AC-76  | Female | 55 | Squamous cell carcinoma | Well   | T2 | N0 |
| ESCC-AC-77  | Female | 68 | Squamous cell carcinoma | Well   | T2 | N0 |
| ESCC-AC-78  | Female | 68 | Squamous cell carcinoma | Well   | T2 | N0 |
| ESCC-AC-79  | Female | 64 | Squamous cell carcinoma | Well   | T2 | N0 |
| ESCC-AC-80  | Female | 60 | Squamous cell carcinoma | Well   | T2 | N0 |
| ESCC-AC-81  | Female | 48 | Squamous cell carcinoma | Well   | T1 | N0 |
| ESCC-AC-82  | Male   | 51 | Squamous cell carcinoma | Well   | T2 | N1 |
| ESCC-AC-83  | Male   | 72 | Squamous cell carcinoma | Well   | T2 | N1 |
| ESCC-AC-84  | Male   | 38 | Squamous cell carcinoma | Well   | T2 | N1 |
| ESCC-AC-85  | Male   | 74 | Squamous cell carcinoma | Well   | T2 | N1 |
| ESCC-AC-86  | Male   | 72 | Squamous cell carcinoma | Well   | T2 | N1 |
| ESCC-AC-87  | Male   | 73 | Squamous cell carcinoma | Well   | T2 | N1 |
| ESCC-AC-88  | Male   | 71 | Squamous cell carcinoma | Well   | T2 | N1 |
| ESCC-AC-89  | Male   | 60 | Squamous cell carcinoma | Well   | T2 | N1 |
| ESCC-AC-90  | Male   | 62 | Squamous cell carcinoma | Well   | T2 | N1 |
| ESCC-AC-91  | Female | 68 | Squamous cell carcinoma | Well   | T2 | N1 |
| ESCC-AC-92  | Female | 77 | Squamous cell carcinoma | Well   | T2 | N1 |
| ESCC-AC-93  | Male   | 46 | Squamous cell carcinoma | Middle | T2 | N0 |
| ESCC-AC-94  | Male   | 50 | Squamous cell carcinoma | Middle | T2 | N0 |
| ESCC-AC-95  | Male   | 58 | Squamous cell carcinoma | Middle | T2 | N0 |
| ESCC-AC-96  | Male   | 58 | Squamous cell carcinoma | Middle | T2 | N0 |
| ESCC-AC-97  | Male   | 50 | Squamous cell carcinoma | Middle | T2 | N0 |
| ESCC-AC-98  | Male   | 69 | Squamous cell carcinoma | Middle | T2 | N0 |
| ESCC-AC-99  | Male   | 49 | Squamous cell carcinoma | Middle | T2 | N0 |
| ESCC-AC-100 | Male   | 64 | Squamous cell carcinoma | Middle | T2 | N0 |
| ESCC-AC-101 | Male   | 39 | Squamous cell carcinoma | Middle | T2 | N0 |
| ESCC-AC-102 | Male   | 65 | Squamous cell carcinoma | Middle | T2 | N0 |
| ESCC-AC-103 | Male   | 57 | Squamous cell carcinoma | Middle | T2 | N0 |
| ESCC-AC-104 | Male   | 48 | Squamous cell carcinoma | Middle | T2 | N0 |
| ESCC-AC-105 | Male   | 58 | Squamous cell carcinoma | Middle | T2 | N0 |
| ESCC-AC-106 | Male   | 76 | Squamous cell carcinoma | Middle | T2 | N0 |
| ESCC-AC-107 | Male   | 60 | Squamous cell carcinoma | Middle | T2 | N0 |
| ESCC-AC-108 | Male   | 41 | Squamous cell carcinoma | Middle | T2 | N0 |
| ESCC-AC-109 | Male   | 57 | Squamous cell carcinoma | Middle | T2 | N0 |
| ESCC-AC-110 | Male   | 69 | Squamous cell carcinoma | Middle | T2 | N0 |
| ESCC-AC-111 | Male   | 56 | Squamous cell carcinoma | Middle | T2 | N0 |
| ESCC-AC-112 | Male   | 57 | Squamous cell carcinoma | Middle | T2 | N0 |
| ESCC-AC-113 | Male   | 53 | Squamous cell carcinoma | Middle | T2 | N0 |
| ESCC-AC-114 | Male   | 56 | Squamous cell carcinoma | Middle | T2 | N0 |

|             |        |    |                         |        |    |    |
|-------------|--------|----|-------------------------|--------|----|----|
| ESCC-AC-115 | Male   | 70 | Squamous cell carcinoma | Middle | T2 | NO |
| ESCC-AC-116 | Male   | 63 | Squamous cell carcinoma | Middle | T2 | NO |
| ESCC-AC-117 | Male   | 58 | Squamous cell carcinoma | Middle | T2 | NO |
| ESCC-AC-118 | Male   | 64 | Squamous cell carcinoma | Middle | T2 | NO |
| ESCC-AC-119 | Male   | 62 | Squamous cell carcinoma | Middle | T2 | NO |
| ESCC-AC-120 | Female | 76 | Squamous cell carcinoma | Middle | T2 | NO |
| ESCC-AC-121 | Female | 43 | Squamous cell carcinoma | Middle | T2 | NO |
| ESCC-AC-122 | Female | 72 | Squamous cell carcinoma | Middle | T2 | NO |
| ESCC-AC-123 | Female | 45 | Squamous cell carcinoma | Middle | T2 | NO |
| ESCC-AC-124 | Female | 74 | Squamous cell carcinoma | Middle | T2 | NO |
| ESCC-AC-125 | Female | 73 | Squamous cell carcinoma | Middle | T2 | NO |
| ESCC-AC-126 | Female | 61 | Squamous cell carcinoma | Middle | T2 | NO |
| ESCC-AC-127 | Female | 63 | Squamous cell carcinoma | Middle | T2 | NO |
| ESCC-AC-128 | Female | 69 | Squamous cell carcinoma | Middle | T2 | NO |
| ESCC-AC-129 | Female | 52 | Squamous cell carcinoma | Middle | T2 | NO |
| ESCC-AC-130 | Female | 57 | Squamous cell carcinoma | Middle | T2 | NO |
| ESCC-AC-131 | Male   | 77 | Squamous cell carcinoma | Middle | T1 | NO |
| ESCC-AC-132 | Male   | 65 | Squamous cell carcinoma | Middle | T1 | NO |
| ESCC-AC-133 | Female | 60 | Squamous cell carcinoma | Middle | T1 | NO |
| ESCC-AC-134 | Female | 63 | Squamous cell carcinoma | Middle | T1 | NO |
| ESCC-AC-135 | Female | 66 | Squamous cell carcinoma | Middle | T1 | NO |
| ESCC-AC-136 | Male   | 58 | Squamous cell carcinoma | Middle | T2 | N1 |
| ESCC-AC-137 | Male   | 68 | Squamous cell carcinoma | Middle | T2 | N1 |
| ESCC-AC-138 | Male   | 55 | Squamous cell carcinoma | Middle | T2 | N1 |
| ESCC-AC-139 | Male   | 46 | Squamous cell carcinoma | Middle | T2 | N1 |
| ESCC-AC-140 | Male   | 63 | Squamous cell carcinoma | Middle | T2 | N1 |
| ESCC-AC-141 | Male   | 50 | Squamous cell carcinoma | Middle | T2 | N1 |
| ESCC-AC-142 | Male   | 60 | Squamous cell carcinoma | Middle | T2 | N1 |
| ESCC-AC-143 | Male   | 58 | Squamous cell carcinoma | Middle | T2 | N1 |
| ESCC-AC-144 | Male   | 65 | Squamous cell carcinoma | Middle | T2 | N1 |
| ESCC-AC-145 | Male   | 54 | Squamous cell carcinoma | Middle | T2 | N1 |
| ESCC-AC-146 | Male   | 47 | Squamous cell carcinoma | Middle | T2 | N1 |
| ESCC-AC-147 | Male   | 64 | Squamous cell carcinoma | Middle | T2 | N1 |
| ESCC-AC-148 | Male   | 58 | Squamous cell carcinoma | Middle | T2 | N1 |
| ESCC-AC-149 | Male   | 71 | Squamous cell carcinoma | Middle | T2 | N1 |
| ESCC-AC-150 | Male   | 45 | Squamous cell carcinoma | Middle | T2 | N1 |
| ESCC-AC-151 | Female | 63 | Squamous cell carcinoma | Middle | T2 | N1 |
| ESCC-AC-152 | Female | 75 | Squamous cell carcinoma | Middle | T2 | N1 |
| ESCC-AC-153 | Female | 60 | Squamous cell carcinoma | Middle | T2 | N1 |
| ESCC-AC-154 | Female | 68 | Squamous cell carcinoma | Middle | T2 | N1 |
| ESCC-AC-155 | Female | 55 | Squamous cell carcinoma | Middle | T2 | N1 |
| ESCC-AC-156 | Female | 60 | Squamous cell carcinoma | Middle | T2 | N1 |
| ESCC-AC-157 | Female | 68 | Squamous cell carcinoma | Middle | T2 | N1 |
| ESCC-AC-158 | Female | 60 | Squamous cell carcinoma | Middle | T2 | N1 |
| ESCC-AC-159 | Female | 71 | Squamous cell carcinoma | Middle | T2 | N1 |
| ESCC-AC-160 | Male   | 57 | Squamous cell carcinoma | Middle | T1 | N1 |
| ESCC-AC-161 | Male   | 58 | Squamous cell carcinoma | Poor   | T2 | NO |
| ESCC-AC-162 | Male   | 60 | Squamous cell carcinoma | Poor   | T2 | NO |
| ESCC-AC-163 | Male   | 58 | Squamous cell carcinoma | Poor   | T2 | NO |
| ESCC-AC-164 | Female | 56 | Squamous cell carcinoma | Poor   | T2 | NO |
| ESCC-AC-165 | Female | 61 | Squamous cell carcinoma | Poor   | T2 | NO |
| ESCC-AC-166 | Male   | 57 | Squamous cell carcinoma | Poor   | T1 | NO |
| ESCC-AC-167 | Male   | 79 | Squamous cell carcinoma | Poor   | T2 | N1 |
| ESCC-AC-168 | Male   | 58 | Squamous cell carcinoma | Poor   | T2 | N1 |
| ESCC-AC-169 | Male   | 58 | Squamous cell carcinoma | Poor   | T2 | N1 |
| ESCC-AC-170 | Female | 59 | Squamous cell carcinoma | Poor   | T2 | N1 |
| ESCC-AC-171 | Female | 64 | Squamous cell carcinoma | Poor   | T2 | N1 |
| ESCC-AC-172 | Male   | 73 | Squamous cell carcinoma | Poor   | T1 | N1 |

N.D., No data available.

**Supplementary Table 3. Summary of somatic mutations in Discovery Cohort**

| Patient ID | Mutation location | Gene Name                                     | Mutation type       | Amino Acid Change             | Cosmic V58 Match Position | Chr   | Start position | End position | Germline allele | Tumor allele |
|------------|-------------------|-----------------------------------------------|---------------------|-------------------------------|---------------------------|-------|----------------|--------------|-----------------|--------------|
| ESCC-D1    | exonic            | <i>DNAH10</i>                                 | nonsynonymous SNV   | NM_207437:c.G1795A:p.D599N    |                           | chr12 | 124281365      | 124281365    | G               | A            |
| ESCC-D1    | exonic            | <i>DNAH10</i>                                 | nonsynonymous SNV   | NM_207437:c.G1689C:p.K563N    |                           | chr12 | 124281259      | 124281259    | G               | C            |
| ESCC-D1    | exonic            | <i>DNAH10</i>                                 | nonsynonymous SNV   | NM_207437:c.G1669C:p.E557Q    |                           | chr12 | 124281239      | 124281239    | G               | C            |
| ESCC-D1    | exonic            | <i>DNAH10</i>                                 | nonsynonymous SNV   | NM_207437:c.G6060T:p.K2020N   |                           | chr12 | 124337875      | 124337875    | G               | T            |
| ESCC-D1    | exonic            | <i>WDR87</i>                                  | nonsynonymous SNV   | NM_031951:c.T7672A:p.S2558T   |                           | chr19 | 38376522       | 38376522     | A               | T            |
| ESCC-D1    | exonic            | <i>DNAH10</i>                                 | nonsynonymous SNV   | NM_207437:c.G5714A:p.R1905Q   |                           | chr12 | 124333395      | 124333395    | G               | A            |
| ESCC-D1    | exonic            | <i>TMEM232</i>                                | nonsynonymous SNV   | NM_001039763:c.C761A:p.S254Y  |                           | chr5  | 109960975      | 109960975    | G               | T            |
| ESCC-D1    | exonic            | <i>LRR1M3</i>                                 | nonsynonymous SNV   | NM_178011:c.T964C:p.S322P     |                           | chr10 | 68687638       | 68687638     | T               | C            |
| ESCC-D1    | exonic            | <i>ZNF221</i>                                 | nonsynonymous SNV   | NM_013359:c.G653C:p.R218T     |                           | chr19 | 44470307       | 44470307     | G               | C            |
| ESCC-D1    | exonic            | <i>GRAM3</i>                                  | nonsynonymous SNV   | NM_000840:c.A139G:p.I47V      |                           | chr7  | 86394600       | 86394600     | A               | G            |
| ESCC-D1    | splicing          | <i>USH2A(NM_206933:exon49:c.9372-1G&gt;T)</i> |                     |                               |                           | chr1  | 215990538      | 215990538    | C               | A            |
| ESCC-D1    | exonic            | <i>AMOTL1</i>                                 | nonsynonymous SNV   | NM_130847:c.C2387T:p.S796F    |                           | chr11 | 94599232       | 94599232     | C               | T            |
| ESCC-D1    | exonic            | <i>SLC25A2</i>                                | nonsynonymous SNV   | NM_031947:c.G514A:p.G172R     |                           | chr5  | 140682919      | 140682919    | C               | T            |
| ESCC-D1    | exonic            | <i>BC19</i>                                   | nonsynonymous SNV   | NM_004326:c.C1412G:p.A471G    |                           | chr1  | 147091373      | 147091373    | C               | G            |
| ESCC-D1    | exonic            | <i>PPP1R10</i>                                | nonsynonymous SNV   | NM_002714:c.C34T:p.L12F       |                           | chr6  | 30577688       | 30577688     | G               | A            |
| ESCC-D1    | exonic;splicing   | <i>POLQ;POLQ</i>                              | nonsynonymous SNV   | NM_199420:c.G252T:p.S841I     |                           | chr3  | 121212325      | 121212325    | C               | A            |
| ESCC-D1    | exonic            | <i>SLC05A1</i>                                | stopgain SNV        | NM_001146008:c.C811T:p.Q271X  |                           | chr8  | 70744098       | 70744098     | G               | A            |
| ESCC-D1    | exonic            | <i>ANKIB1</i>                                 | nonsynonymous SNV   | NM_019004:c.G3197C:p.G1066A   |                           | chr7  | 92028190       | 92028190     | G               | C            |
| ESCC-D1    | exonic            | <i>NFIB</i>                                   | nonsynonymous SNV   | NM_001190737:c.C461T:p.S154F  |                           | chr9  | 14307089       | 14307089     | G               | A            |
| ESCC-D1    | exonic            | <i>KIF13A</i>                                 | nonsynonymous SNV   | NM_001105566:c.C443T:p.S148F  |                           | chr6  | 17855719       | 17855719     | G               | A            |
| ESCC-D1    | exonic            | <i>NABP2</i>                                  | nonsynonymous SNV   | NM_018177:c.A2882G:p.Q961R    |                           | chr4  | 40122613       | 40122613     | A               | G            |
| ESCC-D1    | exonic            | <i>RASGRP3</i>                                | nonsynonymous SNV   | NM_015376:c.C1646T:p.A549V    |                           | chr2  | 33783347       | 33783347     | C               | T            |
| ESCC-D1    | exonic            | <i>MAFK11</i>                                 | nonsynonymous SNV   | NM_002751:c.G874C:p.D292H     |                           | chr22 | 50703891       | 50703891     | C               | G            |
| ESCC-D1    | exonic            | <i>ZNF714</i>                                 | nonsynonymous SNV   | NM_182515:c.T304A:p.Y102N     |                           | chr19 | 21299774       | 21299774     | T               | A            |
| ESCC-D1    | exonic            | <i>CLCN4</i>                                  | nonsynonymous SNV   | NM_001830:c.C77T:p.T26M       |                           | chrX  | 10153149       | 10153149     | C               | T            |
| ESCC-D1    | exonic            | <i>LRRC4C</i>                                 | nonsynonymous SNV   | NM_020929:c.T635A:p.I212N     |                           | chr11 | 40137208       | 40137208     | A               | T            |
| ESCC-D1    | exonic            | <i>CTLA4</i>                                  | nonsynonymous SNV   | NM_001037631:c.C151G:p.R51G   |                           | chr2  | 204735350      | 204735350    | C               | G            |
| ESCC-D1    | exonic            | <i>ORSK3</i>                                  | nonsynonymous SNV   | NM_001005516:c.T394C:p.Y132H  |                           | chr3  | 98109903       | 98109903     | T               | C            |
| ESCC-D1    | exonic            | <i>NBPF14</i>                                 | nonsynonymous SNV   | NM_015383:c.T1940C:p.V67A     |                           | chr1  | 148009367      | 148009367    | A               | G            |
| ESCC-D1    | exonic;splicing   | <i>PCDH9;PCDH9</i>                            | nonsynonymous SNV   | NM_020403:c.C3038T:p.S1013L   |                           | chr13 | 67205542       | 67205542     | G               | A            |
| ESCC-D1    | exonic            | <i>JARID2</i>                                 | nonsynonymous SNV   | NM_004973:c.G2914A:p.G972S    |                           | chr6  | 15511594       | 15511594     | G               | A            |
| ESCC-D1    | exonic            | <i>KANSL1L</i>                                | nonsynonymous SNV   | NM_152519:c.G1120C:p.D374H    |                           | chr2  | 210993865      | 210993865    | C               | G            |
| ESCC-D1    | exonic            | <i>ZNF480</i>                                 | nonsynonymous SNV   | NM_144684:c.T5G:p.L2R         |                           | chr2  | 210993865      | 210993865    | C               | T            |
| ESCC-D1    | exonic            | <i>KRT33A</i>                                 | nonsynonymous SNV   | NM_004138:c.G689A:p.S230N     |                           | chr17 | 39503374       | 39503374     | C               | T            |
| ESCC-D1    | exonic            | <i>MYBPC1</i>                                 | nonsynonymous SNV   | NM_002465:c.C158A:p.A53D      |                           | chr12 | 102021562      | 102021562    | C               | A            |
| ESCC-D1    | exonic            | <i>EPAS1</i>                                  | nonsynonymous SNV   | NM_001430:c.C376A:p.L126I     |                           | chr2  | 46583869       | 46583869     | C               | A            |
| ESCC-D1    | exonic            | <i>PKM2</i>                                   | nonsynonymous SNV   | NM_002654                     |                           | chr15 | 72501131       | 72501131     | C               | T            |
| ESCC-D1    | splicing          | <i>COL11A1</i>                                | splicing            | NM_001854                     |                           | chr1  | 103412403      | 103412403    | A               | T            |
| ESCC-D2    | exonic            | <i>CRNKL1</i>                                 | nonsynonymous SNV   | NM_016652:c.G1973A:p.R658K    |                           | chr20 | 20020308       | 20020308     | C               | T            |
| ESCC-D2    | exonic            | <i>DDX42</i>                                  | nonsynonymous SNV   | NM_203499:c.C1544T:p.A515V    |                           | chr17 | 61889437       | 61889437     | C               | T            |
| ESCC-D2    | exonic            | <i>CMYA5</i>                                  | nonsynonymous SNV   | NM_153610:c.T9950C:p.V3317A   |                           | chr5  | 79034538       | 79034538     | T               | C            |
| ESCC-D2    | exonic            | <i>BDP1</i>                                   | stopgain SNV        | NM_018429:c.G3826T:p.E1276X   |                           | chr5  | 70806745       | 70806745     | G               | T            |
| ESCC-D2    | exonic            | <i>GOT1L1</i>                                 | frameshift deletion | NM_152413:c.I243delA:p.T415fs |                           | chr8  | 37791834       | 37791834     | T               | -            |
| ESCC-D2    | exonic            | <i>TLR7</i>                                   | nonsynonymous SNV   | NM_016562:c.C3056T:p.P1019L   |                           | chrX  | 12906683       | 12906683     | C               | T            |
| ESCC-D2    | exonic            | <i>ZMYM1</i>                                  | nonsynonymous SNV   | NM_024772:c.C2311T:p.L771F    |                           | chr1  | 35579742       | 35579742     | C               | T            |
| ESCC-D2    | exonic            | <i>CNNM2</i>                                  | nonsynonymous SNV   | NM_017649:c.G500T:p.R167L     |                           | chr10 | 104678737      | 104678737    | G               | T            |
| ESCC-D2    | exonic            | <i>C7</i>                                     | nonsynonymous SNV   | NM_000587:c.G1144A:p.A382T    |                           | chr5  | 40955539       | 40955539     | G               | A            |
| ESCC-D2    | exonic            | <i>L3MBTL3</i>                                | nonsynonymous SNV   | NM_001007102:c.G1889A:p.R630K |                           | chr6  | 130442101      | 130442101    | G               | A            |
| ESCC-D2    | exonic            | <i>DNAH5</i>                                  | nonsynonymous SNV   | NM_001369:c.G4025T:p.C1342F   |                           | chr5  | 13867911       | 13867911     | C               | A            |
| ESCC-D2    | exonic            | <i>FAM5C</i>                                  | nonsynonymous SNV   | NM_199051:c.C416T:p.A139V     |                           | chr1  | 190250701      | 190250701    | G               | A            |

|         |        |                |                         |                                         |  |       |           |           |     |     |
|---------|--------|----------------|-------------------------|-----------------------------------------|--|-------|-----------|-----------|-----|-----|
| ESCC-D2 | exonic | <i>SPAST</i>   | nonsynonymous SNV       | NM_199436:c.G928C:p.D310H               |  | chr2  | 32341207  | 32341207  | G   | C   |
| ESCC-D2 | exonic | <i>ANKRD12</i> | nonsynonymous SNV       | NM_001083625:c.C1177A:p.Q393K           |  | chr18 | 9254511   | 9254511   | C   | A   |
| ESCC-D2 | exonic | <i>CNTN5</i>   | nonsynonymous SNV       | NM_175566:c.C2264G:p.S755C              |  | chr11 | 100169994 | 100169994 | C   | G   |
| ESCC-D2 | exonic | <i>FEZ1</i>    | nonsynonymous SNV       | NM_005103:c.G202C:p.E68Q                |  | chr11 | 125359472 | 125359472 | C   | G   |
| ESCC-D2 | exonic | <i>PIK3CG</i>  | nonsynonymous SNV       | NM_002649:c.A3097G:p.M1033V             |  | chr7  | 106545620 | 106545620 | A   | G   |
| ESCC-D2 | exonic | <i>MUC16</i>   | nonsynonymous SNV       | NM_024690:c.T2641I:c.L8804S             |  | chr19 | 9061035   | 9061035   | A   | G   |
| ESCC-D2 | exonic | <i>MRPL40</i>  | nonframeshift insertion | NM_003776:c.232_233insCTA:p.A78delinsAT |  | chr22 | 19422353  | 19422353  | -   | CTA |
| ESCC-D2 | exonic | <i>ABCB1</i>   | nonsynonymous SNV       | NM_000927:c.A955G:p.T319A               |  | chr7  | 87183121  | 87183121  | T   | C   |
| ESCC-D2 | exonic | <i>TOX4</i>    | nonsynonymous SNV       | NM_014828:c.C1000G:p.P334A              |  | chr14 | 21960775  | 21960775  | C   | G   |
| ESCC-D2 | exonic | <i>FAXC</i>    | nonsynonymous SNV       | NM_032511:c.C764T:p.S255F               |  | chr6  | 99771379  | 99771379  | G   | A   |
| ESCC-D2 | exonic | <i>FAR2</i>    | nonsynonymous SNV       | NM_018099:c.C787T:p.R263W               |  | chr12 | 29463979  | 29463979  | C   | T   |
| ESCC-D2 | exonic | <i>ARL13A</i>  | nonsynonymous SNV       | NM_001012990:c.C844G:p.Q282E            |  | chrX  | 100243466 | 100243466 | C   | G   |
| ESCC-D2 | exonic | <i>MLPH</i>    | nonsynonymous SNV       | NM_001042467:c.C382T:p.R128C            |  | chr2  | 238419681 | 238419681 | C   | T   |
| ESCC-D2 | exonic | <i>THSD7A</i>  | nonsynonymous SNV       | NM_015204:c.G1913T:p.S638I              |  | chr7  | 11521519  | 11521519  | C   | A   |
| ESCC-D2 | exonic | <i>USP26</i>   | nonsynonymous SNV       | NM_031907:c.C554T:p.S185L               |  | chrX  | 132161695 | 132161695 | G   | A   |
| ESCC-D2 | exonic | <i>FBXO28</i>  | nonsynonymous SNV       | NM_001136115:c.G527A:p.R176H            |  | chr1  | 224345064 | 224345064 | G   | A   |
| ESCC-D2 | exonic | <i>LRRCL5</i>  | nonsynonymous SNV       | NM_130830:c.G1576A:p.D526N              |  | chr3  | 194080197 | 194080197 | C   | T   |
| ESCC-D2 | exonic | <i>CEP350</i>  | nonsynonymous SNV       | NM_014810:c.C716T:p.S239P               |  | chr1  | 179966008 | 179966008 | C   | T   |
| ESCC-D2 | exonic | <i>NBEA</i>    | nonsynonymous SNV       | NM_015678:c.G6031C:p.A2011P             |  | chr13 | 35926312  | 35926312  | G   | C   |
| ESCC-D2 | exonic | <i>USP18</i>   | nonsynonymous SNV       | NM_017414:c.C188T:p.T63I                |  | chr22 | 18642969  | 18642969  | C   | T   |
| ESCC-D2 | exonic | <i>APOA4</i>   | nonsynonymous SNV       | NM_000482:c.G553A:p.E185K               |  | chr11 | 116692221 | 116692221 | C   | T   |
| ESCC-D2 | exonic | <i>DNAH8</i>   | nonsynonymous SNV       | NM_001206927:c.C337T:p.R113C            |  | chr6  | 38690922  | 38690922  | C   | T   |
| ESCC-D2 | exonic | <i>FAM184A</i> | nonsynonymous SNV       | NM_024581:c.A283G:p.L159E               |  | chr6  | 119345855 | 119345855 | T   | C   |
| ESCC-D2 | exonic | <i>MC2R</i>    | nonsynonymous SNV       | NM_000529:c.C476T:p.T159M               |  | chr18 | 13885042  | 13885042  | G   | A   |
| ESCC-D2 | exonic | <i>DHRS1</i>   | nonsynonymous SNV       | NM_001136050:c.A819T:p.Q273H            |  | chr14 | 24760188  | 24760188  | T   | A   |
| ESCC-D2 | exonic | <i>KIF4A</i>   | stopgain SNV            | NM_012310:c.A1999T:p.K667X              |  | chrX  | 69596025  | 69596025  | A   | T   |
| ESCC-D2 | exonic | <i>BPIFC</i>   | nonsynonymous SNV       | NM_174932:c.G313T:p.A105S               |  | chr22 | 32843260  | 32843260  | C   | A   |
| ESCC-D2 | exonic | <i>SI</i>      | nonsynonymous SNV       | NM_001041:c.T884C:p.F295S               |  | chr3  | 164781253 | 164781253 | A   | G   |
| ESCC-D2 | exonic | <i>CAP1</i>    | stopgain SNV            | NM_001105530:c.C326G:p.S109X            |  | chr1  | 40529930  | 40529930  | C   | G   |
| ESCC-D2 | exonic | <i>ZNF560</i>  | nonsynonymous SNV       | NM_152476:c.A866G:p.D289G               |  | chr19 | 9578757   | 9578757   | T   | C   |
| ESCC-D2 | exonic | <i>ACADL</i>   | stopgain SNV            | NM_001608:c.G754T:p.G252X               |  | chr2  | 211070370 | 211070370 | C   | A   |
| ESCC-D2 | exonic | <i>MTMR4</i>   | nonsynonymous SNV       | NM_004687:c.C944T:p.T315M               |  | chr17 | 56584151  | 56584151  | G   | A   |
| ESCC-D2 | exonic | <i>HELZ</i>    | stopgain SNV            | NM_014877:c.C3124T:p.Q1042X             |  | chr17 | 65132144  | 65132144  | G   | A   |
| ESCC-D2 | exonic | <i>NSMCE2</i>  | nonsynonymous SNV       | NM_173685:c.C142G:p.L48V                |  | chr8  | 126114714 | 126114714 | C   | G   |
| ESCC-D2 | exonic | <i>EFEMP1</i>  | nonsynonymous SNV       | NM_001039349:c.G886A:p.D296N            |  | chr2  | 56102195  | 56102195  | C   | T   |
| ESCC-D2 | exonic | <i>PCDHA10</i> | nonsynonymous SNV       | NM_018901:c.A1205G:p.N402S              |  | chr5  | 140236838 | 140236838 | A   | G   |
| ESCC-D2 | exonic | <i>DPCR1</i>   | stopgain SNV            | NM_080870:c.G1168T:p.E390X              |  | chr6  | 30917409  | 30917409  | G   | T   |
| ESCC-D2 | exonic | <i>KLHL1</i>   | nonsynonymous SNV       | NM_020866:c.G1994C:p.R665P              |  | chr13 | 70293522  | 70293522  | C   | G   |
| ESCC-D2 | exonic | <i>MLL2</i>    | stopgain SNV            | NM_003482:c.G9289T:p.E3097X             |  | chr12 | 49431850  | 49431850  | C   | A   |
| ESCC-D2 | exonic | <i>GRIN3A</i>  | nonsynonymous SNV       | NM_133445:c.T1131G:p.H377Q              |  | chr9  | 104449051 | 104449051 | A   | C   |
| ESCC-D2 | exonic | <i>ZNF831</i>  | nonsynonymous SNV       | NM_178457:c.A3886G:p.N1296D             |  | chr20 | 57781970  | 57781970  | A   | G   |
| ESCC-D2 | exonic | <i>FAM122B</i> | nonsynonymous SNV       | NM_001166599:c.A429C:p.R143S            |  | chrX  | 133921513 | 133921513 | T   | G   |
| ESCC-D2 | exonic | <i>RICTOR</i>  | stopgain SNV            | NM_152756:c.C553T:p.R185X               |  | chr5  | 38991081  | 38991081  | G   | A   |
| ESCC-D2 | exonic | <i>ZNF34</i>   | nonsynonymous SNV       | NM_030580:c.A717T:p.K239N               |  | chr8  | 145999617 | 145999617 | T   | A   |
| ESCC-D2 | exonic | <i>IL1F10</i>  | nonsynonymous SNV       | NM_032556:c.G333T:p.R111S               |  | chr2  | 113832815 | 113832815 | G   | T   |
| ESCC-D2 | exonic | <i>OSCP1</i>   | nonsynonymous SNV       | NM_145047:c.C386T:p.S129F               |  | chr1  | 36898072  | 36898072  | G   | A   |
| ESCC-D2 | exonic | <i>ERAL1</i>   | nonframeshift deletion  | NM_005702:c.914_916del:p.305_306del     |  | chr17 | 27185796  | 27185798  | TCT | -   |
| ESCC-D2 | exonic | <i>UNC93A</i>  | nonsynonymous SNV       | NM_001143947:c.C52G:p.L18V              |  | chr6  | 167705029 | 167705029 | C   | G   |
| ESCC-D2 | exonic | <i>WDR26</i>   | nonsynonymous SNV       | NM_001115113:c.G1754A:p.R585H           |  | chr1  | 224581688 | 224581688 | C   | T   |
| ESCC-D2 | exonic | <i>PAM</i>     | nonsynonymous SNV       | NM_138821:c.G1840C:p.E614Q              |  | chr5  | 102343307 | 102343307 | G   | C   |
| ESCC-D2 | exonic | <i>SMG5</i>    | nonsynonymous SNV       | NM_015327:c.G1352A:p.R451H              |  | chr1  | 156236075 | 156236075 | C   | T   |
| ESCC-D2 | exonic | <i>PHTF1</i>   | stopgain SNV            | NM_006608:c.C496T:p.R166X               |  | chr1  | 114267508 | 114267508 | G   | A   |
| ESCC-D2 | exonic | <i>BPIL2</i>   | nonsynonymous SNV       | NM_174932                               |  | chr22 | 32843260  | 32843260  | C   | A   |
| ESCC-D2 | exonic | <i>NRAP</i>    | nonsynonymous SNV       | NM_006175                               |  | chr10 | 115409812 | 115409812 | G   | C   |



|         |                 |                                                                                                                 |                      |                                    |                            |       |           |           |   |   |
|---------|-----------------|-----------------------------------------------------------------------------------------------------------------|----------------------|------------------------------------|----------------------------|-------|-----------|-----------|---|---|
| ESCC-D2 | exonic          | <i>TP53</i>                                                                                                     | nonsynonymous SNV    | NM_000546                          |                            | chr17 | 7578406   | 7578406   | C | T |
| ESCC-D2 | exonic          | <i>DIAPH3</i>                                                                                                   | nonsynonymous SNV    | NM_001042517                       |                            | chr13 | 60566708  | 60566708  | T | A |
| ESCC-D2 | exonic          | <i>VPS13D</i>                                                                                                   | nonsynonymous SNV    | NM_015378                          |                            | chr1  | 12336375  | 12336375  | C | G |
| ESCC-D2 | exonic          | <i>OR10J5</i>                                                                                                   | nonsynonymous SNV    | NM_001004469                       |                            | chr1  | 159505272 | 159505272 | A | C |
| ESCC-D2 | exonic          | <i>TNRC6C</i>                                                                                                   | stopgain SNV         | NM_001142640                       |                            | chr17 | 76046401  | 76046401  | C | T |
| ESCC-D2 | exonic          | <i>RALY</i>                                                                                                     | nonsynonymous SNV    | NM_007367                          |                            | chr20 | 32660077  | 32660077  | G | A |
| ESCC-D2 | exonic          | <i>THPO</i>                                                                                                     | nonsynonymous SNV    | NM_000460                          |                            | chr3  | 184090515 | 184090515 | G | A |
| ESCC-D3 | exonic          | <i>XIRP2</i>                                                                                                    | nonsynonymous SNV    | NM_001199144:c.G8332T;p.A2778S     |                            | chr2  | 168106900 | 168106900 | G | T |
| ESCC-D3 | exonic          | <i>WDR64</i>                                                                                                    | nonsynonymous SNV    | NM_144625:c.C223T;p.R75C           |                            | chr1  | 241823909 | 241823909 | C | T |
| ESCC-D3 | splicing        | <i>TP53(NM_001126117:exon5:c.523+1G&gt;A,NM_001126112:exon9:c.919+1G&gt;A,NM_001126116:exon5:c.523+1G&gt;A)</i> |                      |                                    | 753566;905938;907276;90812 | chr17 | 7577018   | 7577018   | C | T |
| ESCC-D3 | exonic          | <i>NFATC3</i>                                                                                                   | nonsynonymous SNV    | NM_004555:c.G2954T;p.G985V         |                            | chr16 | 68225526  | 68225526  | G | T |
| ESCC-D3 | exonic          | <i>THSD7A</i>                                                                                                   | nonsynonymous SNV    | NM_015204:c.G4471C;p.V1491L        |                            | chr7  | 11422184  | 11422184  | C | G |
| ESCC-D3 | exonic          | <i>TAA8</i>                                                                                                     | stopgain SNV         | NM_053278:c.C453A;p.C151X          |                            | chr6  | 132874284 | 132874284 | C | A |
| ESCC-D3 | exonic          | <i>SLC9A4</i>                                                                                                   | nonsynonymous SNV    | NM_001011552:c.A1713G;p.I571M      |                            | chr2  | 103130702 | 103130702 | A | G |
| ESCC-D3 | exonic          | <i>NRM</i>                                                                                                      | nonsynonymous SNV    | NM_007243:c.G125A;p.G42D           |                            | chr6  | 30658627  | 30658627  | C | T |
| ESCC-D3 | exonic          | <i>PRDM2</i>                                                                                                    | nonsynonymous SNV    | NM_001007257:c.A1414G;p.T472A      |                            | chr1  | 14106307  | 14106307  | A | G |
| ESCC-D3 | exonic          | <i>OR6Q1</i>                                                                                                    | nonsynonymous SNV    | NM_001005186:c.G124A;p.V42M        |                            | chr11 | 57798548  | 57798548  | G | A |
| ESCC-D3 | exonic          | <i>PGBD2</i>                                                                                                    | nonsynonymous SNV    | NM_001017434:c.C883T;p.R295C       |                            | chr1  | 249212419 | 249212419 | C | T |
| ESCC-D3 | exonic          | <i>HNRNPUL1</i>                                                                                                 | nonsynonymous SNV    | NM_007040:c.C2155T;p.P719S         |                            | chr19 | 41810059  | 41810059  | C | T |
| ESCC-D3 | exonic          | <i>ZNF540</i>                                                                                                   | nonsynonymous SNV    | NM_001172226:c.A770G;p.H257R       |                            | chr19 | 38103047  | 38103047  | A | G |
| ESCC-D3 | exonic          | <i>FAM111B</i>                                                                                                  | nonsynonymous SNV    | NM_001142704:c.T158A;p.F53Y        |                            | chr11 | 58891818  | 58891818  | T | A |
| ESCC-D3 | exonic          | <i>SMO</i>                                                                                                      | nonsynonymous SNV    | NM_005631:c.G1604T;p.W535L         | 913798;913799;913812;91383 | chr7  | 128850341 | 128850341 | G | T |
| ESCC-D3 | exonic          | <i>NFE2L2</i>                                                                                                   | nonsynonymous SNV    | NM_001145412:c.T62C;p.F21S         |                            | chr2  | 178098935 | 178098935 | A | G |
| ESCC-D3 | exonic          | <i>MCM6</i>                                                                                                     | nonsynonymous SNV    | NM_005915:c.G2312C;p.R771T         |                            | chr2  | 136602152 | 136602152 | C | G |
| ESCC-D3 | exonic          | <i>KDR</i>                                                                                                      | nonsynonymous SNV    | NM_002253:c.G1996T;p.A666S         |                            | chr4  | 55968667  | 55968667  | C | A |
| ESCC-D3 | exonic          | <i>PDZD2</i>                                                                                                    | nonsynonymous SNV    | NM_178140:c.C3680G;p.T1227S        |                            | chr5  | 32077710  | 32077710  | C | G |
| ESCC-D3 | exonic          | <i>C10orf118</i>                                                                                                | nonsynonymous SNV    | NM_018017:c.A742G;p.M248V          |                            | chr10 | 115917330 | 115917330 | T | C |
| ESCC-D3 | exonic          | <i>NAA35</i>                                                                                                    | stopgain SNV         | NM_024635:c.C574T;p.R192X          |                            | chr9  | 88589939  | 88589939  | C | T |
| ESCC-D3 | exonic          | <i>TDRKH</i>                                                                                                    | nonsynonymous SNV    | NM_001083963:c.G115A;p.E39K        |                            | chr1  | 151755384 | 151755384 | C | T |
| ESCC-D3 | exonic          | <i>FAM160A1</i>                                                                                                 | nonsynonymous SNV    | NM_001109977:c.G574A;p.A192T       |                            | chr4  | 152499070 | 152499070 | G | A |
| ESCC-D3 | splicing        | <i>BAI3(NM_001704:exon11:c.1929+1G&gt;A)</i>                                                                    |                      |                                    |                            | chr6  | 69703855  | 69703855  | G | A |
| ESCC-D3 | exonic          | <i>EGFR</i>                                                                                                     | nonsynonymous SNV    | NM_005228:c.A2560C;p.T854P         | 1162653;1206733            | chr7  | 55259502  | 55259502  | A | C |
| ESCC-D3 | exonic          | <i>ERBB4</i>                                                                                                    | nonsynonymous SNV    | NM_001042599:c.G2468C;p.W823S      |                            | chr2  | 212426647 | 212426647 | C | G |
| ESCC-D3 | exonic          | <i>TRPC3</i>                                                                                                    | nonsynonymous SNV    | NM_003305:c.G1358T;p.C453F         |                            | chr4  | 122831524 | 122831524 | C | A |
| ESCC-D3 | exonic          | <i>ACVR1B</i>                                                                                                   | nonsynonymous SNV    | NM_004302:c.A509T;p.E170V          |                            | chr12 | 52370288  | 52370288  | A | T |
| ESCC-D3 | exonic          | <i>ANKRD28</i>                                                                                                  | nonsynonymous SNV    | NM_001195099:c.C61T;p.R21S         |                            | chr3  | 15776944  | 15776944  | G | A |
| ESCC-D3 | exonic          | <i>RASSF2</i>                                                                                                   | nonsynonymous SNV    | NM_170774:c.A101G;p.Y34C           |                            | chr20 | 4778690   | 4778690   | T | C |
| ESCC-D3 | splicing        | <i>LAMA2(NM_001079823:exon2:c.283+1G&gt;A,NM_000426:exon2:c.283+1G&gt;A)</i>                                    |                      |                                    |                            | chr6  | 129371234 | 129371234 | G | A |
| ESCC-D3 | exonic          | <i>DNAH5</i>                                                                                                    | stopgain SNV         | NM_001369:c.C11725T;p.R3909X       |                            | chr5  | 13735276  | 13735276  | G | A |
| ESCC-D3 | exonic          | <i>ACDA</i>                                                                                                     | nonsynonymous SNV    | NM_020661:c.G232A;p.V78I           |                            | chr12 | 8758006   | 8758006   | C | T |
| ESCC-D3 | exonic          | <i>C9orf78</i>                                                                                                  | nonsynonymous SNV    | NM_016520:c.G861T;p.R287S          |                            | chr9  | 132590449 | 132590449 | C | A |
| ESCC-D3 | exonic          | <i>ZNF34</i>                                                                                                    | nonsynonymous SNV    | NM_030580:c.A717T;p.K239N          |                            | chr8  | 145999617 | 145999617 | T | A |
| ESCC-D3 | exonic          | <i>PAXIP1</i>                                                                                                   | nonsynonymous SNV    | NM_007349:c.A2350G;p.R784G         |                            | chr7  | 154752687 | 154752687 | T | C |
| ESCC-D4 | exonic          | <i>ELAC2</i>                                                                                                    | nonsynonymous SNV    | NM_001165962:c.C1730T;p.S577F      |                            | chr17 | 12898338  | 12898338  | G | A |
| ESCC-D4 | exonic;splicing | <i>TIN.TTN</i>                                                                                                  | nonsynonymous SNV    | NM_133378:c.G23875A;p.E7959K       |                            | chr2  | 179577042 | 179577042 | C | T |
| ESCC-D4 | exonic          | <i>LRP2BP</i>                                                                                                   | nonsynonymous SNV    | NM_018409:c.G170A;p.G57E           |                            | chr4  | 186298109 | 186298109 | C | T |
| ESCC-D4 | exonic          | <i>JQUB</i>                                                                                                     | nonsynonymous SNV    | NM_178827:c.T171A;p.Y571N          |                            | chr7  | 123104934 | 123104934 | A | T |
| ESCC-D4 | exonic          | <i>ALG10</i>                                                                                                    | nonsynonymous SNV    | NM_032834:c.C998T;p.S333F          |                            | chr12 | 34179426  | 34179426  | C | T |
| ESCC-D4 | exonic          | <i>HTR2C</i>                                                                                                    | frameshift insertion | NM_000868:c.1263_1264insC;p.E421fs |                            | chrX  | 114141864 | 114141864 | - | C |
| ESCC-D4 | exonic          | <i>MAPK14</i>                                                                                                   | nonsynonymous SNV    | NM_001315:c.C554T;p.T185I          |                            | chr6  | 36043683  | 36043683  | C | T |
| ESCC-D4 | exonic          | <i>HEPHLI</i>                                                                                                   | nonsynonymous SNV    | NM_001098672:c.G1273C;p.G425R      |                            | chr11 | 93806231  | 93806231  | G | C |
| ESCC-D4 | exonic          | <i>CC2D2B</i>                                                                                                   | nonsynonymous SNV    | NM_001001732:c.A14G;p.K5R          |                            | chr10 | 97763998  | 97763998  | A | G |
| ESCC-D4 | exonic          | <i>MAP3K13</i>                                                                                                  | nonsynonymous SNV    | NM_001242317:c.G691A;p.E231K       |                            | chr3  | 185181371 | 185181371 | G | A |
| ESCC-D4 | exonic          | <i>GJA9</i>                                                                                                     | nonsynonymous SNV    | NM_030772:c.G814C;p.A272P          |                            | chr1  | 39340957  | 39340957  | C | G |

|         |          |                                                                                   |                     |                                 |                            |       |           |           |   |   |
|---------|----------|-----------------------------------------------------------------------------------|---------------------|---------------------------------|----------------------------|-------|-----------|-----------|---|---|
| ESCC-D4 | exonic   | <i>CHEK2</i>                                                                      | nonsynonymous SNV   | NM_007194:c.A935C;p.K312T       |                            | chr22 | 29095899  | 29095899  | T | G |
| ESCC-D4 | exonic   | <i>FAM48B2</i>                                                                    | nonsynonymous SNV   | NM_001136233:c.G591C;p.E197D    |                            | chrX  | 24330842  | 24330842  | C | G |
| ESCC-D4 | exonic   | <i>CENPI</i>                                                                      | nonsynonymous SNV   | NM_006733:c.T872C;p.M291T       |                            | chrX  | 100382221 | 100382221 | T | C |
| ESCC-D4 | exonic   | <i>LRRC2</i>                                                                      | nonsynonymous SNV   | NM_024512:c.C32G;p.S11C         |                            | chr3  | 46593050  | 46593050  | G | C |
| ESCC-D4 | exonic   | <i>CTNND1</i>                                                                     | stopgain SNV        | NM_001085469:c.C2123G;p.S708X   |                            | chr11 | 57577589  | 57577589  | C | G |
| ESCC-D4 | exonic   | <i>FAM5C</i>                                                                      | nonsynonymous SNV   | NM_199051:c.C151T;p.T504M       |                            | chr1  | 190067938 | 190067938 | G | A |
| ESCC-D4 | exonic   | <i>ITFG3</i>                                                                      | nonsynonymous SNV   | NM_032039:c.C266A;p.A89D        |                            | chr16 | 304678    | 304678    | C | A |
| ESCC-D4 | exonic   | <i>KLHL2</i>                                                                      | nonsynonymous SNV   | NM_001161522:c.G1271C;p.S424T   |                            | chr4  | 166235244 | 166235244 | G | C |
| ESCC-D4 | exonic   | <i>RG521</i>                                                                      | nonsynonymous SNV   | NM_001039152:c.G393C;p.E131D    |                            | chr1  | 192335188 | 192335188 | G | C |
| ESCC-D4 | exonic   | <i>MYCBP2</i>                                                                     | nonsynonymous SNV   | NM_015057:c.G11683A;p.E3895K    |                            | chr13 | 77651324  | 77651324  | C | T |
| ESCC-D4 | exonic   | <i>CTDSP2</i>                                                                     | nonsynonymous SNV   | NM_016396:c.C352G;p.Q118E       |                            | chr15 | 44778775  | 44778775  | C | G |
| ESCC-D4 | exonic   | <i>TBC1D4</i>                                                                     | nonsynonymous SNV   | NM_014832:c.C3269T;p.T1090I     |                            | chr13 | 75869037  | 75869037  | G | A |
| ESCC-D4 | exonic   | <i>TTI1</i>                                                                       | nonsynonymous SNV   | NM_014657:c.G2596A;p.V866M      |                            | chr20 | 36631086  | 36631086  | C | T |
| ESCC-D4 | exonic   | <i>ANKRD11</i>                                                                    | nonsynonymous SNV   | NM_001256183:c.G2198A;p.R733Q   |                            | chr16 | 89350752  | 89350752  | C | T |
| ESCC-D4 | splicing | <i>WNK3(NM_020922:exon22:c.4629-1G&gt;-C.NM_001002838:exon22:c.4488-1G&gt;-C)</i> |                     |                                 |                            | chrX  | 54259454  | 54259454  | C | G |
| ESCC-D4 | exonic   | <i>LRAT</i>                                                                       | nonsynonymous SNV   | NM_004744:c.C492G;p.F164L       |                            | chr4  | 155665970 | 155665970 | C | G |
| ESCC-D4 | exonic   | <i>RAPGEF5</i>                                                                    | nonsynonymous SNV   | NM_012294:c.C1615G;p.L539V      |                            | chr7  | 22184774  | 22184774  | G | C |
| ESCC-D4 | exonic   | <i>F8</i>                                                                         | nonsynonymous SNV   | NM_000132:c.G1985C;p.G662A      |                            | chrX  | 154176101 | 154176101 | C | G |
| ESCC-D4 | exonic   | <i>ZNF182</i>                                                                     | nonsynonymous SNV   | NM_001007088:c.A622G;p.I208V    |                            | chrX  | 47836807  | 47836807  | T | C |
| ESCC-D4 | exonic   | <i>HIRIP3</i>                                                                     | nonsynonymous SNV   | NM_003609:c.G834C;p.Q278H       |                            | chr16 | 30005632  | 30005632  | C | G |
| ESCC-D4 | exonic   | <i>SH3YL1</i>                                                                     | nonsynonymous SNV   | NM_001159597:c.G634A;p.E212K    |                            | chr2  | 231091    | 231091    | C | T |
| ESCC-D4 | exonic   | <i>PTPRZ1</i>                                                                     | nonsynonymous SNV   | NM_001206838:c.C955G;p.Q319E    |                            | chr7  | 121636462 | 121636462 | C | G |
| ESCC-D4 | exonic   | <i>SPHKAP</i>                                                                     | nonsynonymous SNV   | NM_001142644:c.G1937T;p.R646I   |                            | chr2  | 228883633 | 228883633 | C | A |
| ESCC-D4 | exonic   | <i>DDX18</i>                                                                      | nonsynonymous SNV   | NM_006773:c.G1460A;p.R487K      |                            | chr2  | 118583114 | 118583114 | G | A |
| ESCC-D4 | exonic   | <i>RNF213</i>                                                                     | nonsynonymous SNV   | NM_001256071:c.G13715A;p.R4572Q |                            | chr17 | 78354705  | 78354705  | G | A |
| ESCC-D4 | exonic   | <i>DNAH7</i>                                                                      | nonsynonymous SNV   | NM_018897:c.A6484G;p.Y2283C     |                            | chr2  | 196729531 | 196729531 | T | C |
| ESCC-D4 | exonic   | <i>PDE11A</i>                                                                     | nonsynonymous SNV   | NM_001077358:c.G187A;p.E63K     |                            | chr2  | 178762826 | 178762826 | C | T |
| ESCC-D4 | exonic   | <i>TEX13B</i>                                                                     | nonsynonymous SNV   | NM_031273:c.G896C;p.R299T       |                            | chrX  | 107224353 | 107224353 | C | G |
| ESCC-D4 | exonic   | <i>ABI3</i>                                                                       | nonsynonymous SNV   | NM_001135186:c.G358A;p.A120T    |                            | chr17 | 47295191  | 47295191  | G | A |
| ESCC-D4 | exonic   | <i>HRH2</i>                                                                       | nonsynonymous SNV   | NM_022304:c.G97A;p.V33I         |                            | chr5  | 175110333 | 175110333 | G | A |
| ESCC-D4 | exonic   | <i>VPS13D</i>                                                                     | nonsynonymous SNV   | NM_015378:c.C6680T;p.S2227F     |                            | chr1  | 12371540  | 12371540  | C | T |
| ESCC-D4 | exonic   | <i>SF3A1</i>                                                                      | nonsynonymous SNV   | NM_001005409:c.G526C;p.D176H    |                            | chr22 | 30738799  | 30738799  | C | G |
| ESCC-D4 | exonic   | <i>SERPINA10</i>                                                                  | nonsynonymous SNV   | NM_001100607:c.G336C;p.L112F    |                            | chr14 | 94756595  | 94756595  | C | G |
| ESCC-D4 | exonic   | <i>REBP</i>                                                                       | stopgain SNV        | NM_002910:c.G1103A;p.W368X      |                            | chrX  | 153201004 | 153201004 | C | T |
| ESCC-D4 | exonic   | <i>LGR6</i>                                                                       | nonsynonymous SNV   | NM_001017404:c.C2095A;p.L699I   |                            | chr1  | 202287943 | 202287943 | C | A |
| ESCC-D4 | exonic   | <i>METTL18</i>                                                                    | nonsynonymous SNV   | NM_033418:c.A548G;p.K183R       |                            | chr1  | 169762289 | 169762289 | T | C |
| ESCC-D4 | exonic   | <i>DDX46</i>                                                                      | nonsynonymous SNV   | NM_014829:c.G2752A;p.E918K      |                            | chr5  | 134153327 | 134153327 | G | A |
| ESCC-D4 | exonic   | <i>XRCC5</i>                                                                      | nonsynonymous SNV   | NM_021141:c.G1882A;p.E628K      |                            | chr2  | 217054995 | 217054995 | G | A |
| ESCC-D4 | exonic   | <i>YSK4</i>                                                                       | nonsynonymous SNV   | NM_025052:c.G1325A;p.S442N      |                            | chr2  | 135745117 | 135745117 | C | T |
| ESCC-D4 | exonic   | <i>FAM179B</i>                                                                    | nonsynonymous SNV   | NM_015091:c.C3209A;p.S1070Y     |                            | chr14 | 45481249  | 45481249  | C | A |
| ESCC-D4 | exonic   | <i>OR2W5</i>                                                                      | nonsynonymous SNV   | NM_001004698:c.G907A;p.E303K    |                            | chr1  | 247655336 | 247655336 | G | A |
| ESCC-D4 | exonic   | <i>CPNE4</i>                                                                      | nonsynonymous SNV   | NM_130808:c.C524G;p.S175C       |                            | chr3  | 131404786 | 131404786 | G | C |
| ESCC-D4 | exonic   | <i>C6</i>                                                                         | nonsynonymous SNV   | NM_000065:c.G214A;p.E72K        |                            | chr5  | 41201746  | 41201746  | C | T |
| ESCC-D4 | exonic   | <i>MYT1L</i>                                                                      | nonsynonymous SNV   | NM_015025:c.G1193A;p.S398N      |                            | chr2  | 1926348   | 1926348   | C | T |
| ESCC-D4 | exonic   | <i>DROSHA</i>                                                                     | nonsynonymous SNV   | NM_013235:c.C835T;p.R279C       |                            | chr5  | 31526205  | 31526205  | G | A |
| ESCC-D4 | exonic   | <i>ZCCHC5</i>                                                                     | nonsynonymous SNV   | NM_152694:c.T1102A;p.S368T      |                            | chrX  | 77912816  | 77912816  | A | T |
| ESCC-D4 | exonic   | <i>LRP1</i>                                                                       | nonsynonymous SNV   | NM_002332:c.A4667G;p.N1556S     |                            | chr12 | 57572733  | 57572733  | A | G |
| ESCC-D4 | splicing | <i>MYO3A(NM_017433:exon30:c.3399-1G&gt;T)</i>                                     |                     |                                 |                            | chr10 | 26462591  | 26462591  | G | T |
| ESCC-D4 | exonic   | <i>EIF3A</i>                                                                      | stopgain SNV        | NM_003750:c.C3785G;p.S1262X     |                            | chr10 | 120796765 | 120796765 | G | C |
| ESCC-D4 | exonic   | <i>C18orf34</i>                                                                   | frameshift deletion | NM_001105528:c.874delA;p.M292fs |                            | chr18 | 30913143  | 30913143  | T | - |
| ESCC-D4 | exonic   | <i>TP53BP1</i>                                                                    | nonsynonymous SNV   | NM_001141979:c.G380A;p.G127E    |                            | chr15 | 43773212  | 43773212  | C | T |
| ESCC-D4 | exonic   | <i>TP53</i>                                                                       | nonsynonymous SNV   | NM_001126115:c.T304C;p.Y102H    | 905938;907050;907276;90926 | chr17 | 7577581   | 7577581   | A | G |
| ESCC-D4 | exonic   | <i>POLR3A</i>                                                                     | nonsynonymous SNV   | NM_007055:c.C3131T;p.P1044L     |                            | chr10 | 79745039  | 79745039  | G | A |
| ESCC-D4 | exonic   | <i>NELL1</i>                                                                      | nonsynonymous SNV   | NM_201551:c.G2067T;p.E689D      |                            | chr11 | 21594781  | 21594781  | G | T |

|         |          |                                                                                                                                                  |                     |                                          |         |       |           |           |    |   |
|---------|----------|--------------------------------------------------------------------------------------------------------------------------------------------------|---------------------|------------------------------------------|---------|-------|-----------|-----------|----|---|
| ESCC-D4 | exonic   | <i>CDK5RAP2</i>                                                                                                                                  | nonsynonymous SNV   | NM_001011649:c.C1755G;p.N585K            |         | chr9  | 123234129 | 123234129 | G  | C |
| ESCC-D4 | exonic   | <i>SLFN13</i>                                                                                                                                    | nonsynonymous SNV   | NM_144682:c.C2020T;p.R674C               |         | chr17 | 33768288  | 33768288  | G  | A |
| ESCC-D4 | splicing | <i>SORBS2(NM_003603:exon10:c.473-1G&gt;A,NM_001145675:exon4:c.92-1G&gt;A,NM_001145672:exon9:c.542-1G&gt;A,NM_001145671:exon10:c.593-1G&gt;A)</i> |                     |                                          |         | chr4  | 186572983 | 186572983 | C  | T |
| ESCC-D4 | exonic   | <i>SORBS2</i>                                                                                                                                    | nonsynonymous SNV   | NM_001145675:c.G97A;p.D33N               |         | chr4  | 186572977 | 186572977 | C  | T |
| ESCC-D4 | exonic   | <i>SULF2</i>                                                                                                                                     | nonsynonymous SNV   | NM_001161841:c.T2132C;p.L711P            |         | chr20 | 46292292  | 46292292  | A  | G |
| ESCC-D4 | exonic   | <i>IMP3</i>                                                                                                                                      | stopgain SNV        | NM_018285:c.C373T;p.Q125X                |         | chr15 | 75932137  | 75932137  | G  | A |
| ESCC-D4 | exonic   | <i>SORBS2</i>                                                                                                                                    | nonsynonymous SNV   | NM_001145674:c.G138C;p.K46N              |         | chr4  | 186570764 | 186570764 | C  | G |
| ESCC-D4 | exonic   | <i>PRPF40B</i>                                                                                                                                   | nonsynonymous SNV   | NM_001031698:c.G1825A;p.E609K            |         | chr12 | 50036024  | 50036024  | G  | A |
| ESCC-D4 | exonic   | <i>C9orf170</i>                                                                                                                                  | nonsynonymous SNV   | NM_001001709:c.G283A;p.D95N              |         | chr9  | 89771602  | 89771602  | G  | A |
| ESCC-D4 | exonic   | <i>PML</i>                                                                                                                                       | nonsynonymous SNV   | NM_033249:c.C1750G;p.L584V               |         | chr15 | 74335513  | 74335513  | C  | G |
| ESCC-D4 | exonic   | <i>SPECC1</i>                                                                                                                                    | nonsynonymous SNV   | NM_001033554:c.G447T;p.E149D             |         | chr17 | 20108052  | 20108052  | G  | T |
| ESCC-D4 | exonic   | <i>RAI1</i>                                                                                                                                      | nonsynonymous SNV   | NM_030665:c.C3919T;p.R1307W              |         | chr17 | 17700181  | 17700181  | C  | T |
| ESCC-D4 | exonic   | <i>ANGPTL6</i>                                                                                                                                   | nonsynonymous SNV   | NM_031917:c.A674G;p.E225G                |         | chr19 | 10205523  | 10205523  | T  | C |
| ESCC-D4 | exonic   | <i>ARID2</i>                                                                                                                                     | nonsynonymous SNV   | NM_152641:c.C2390T;p.P797L               |         | chr12 | 46244296  | 46244296  | C  | T |
| ESCC-D4 | exonic   | <i>MUC4</i>                                                                                                                                      | stopgain SNV        | NM_018406:c.C12599A;p.S4200X             |         | chr3  | 195505852 | 195505852 | G  | T |
| ESCC-D4 | exonic   | <i>TRAK2</i>                                                                                                                                     | nonsynonymous SNV   | NM_015049:c.C2596G;p.Q866E               |         | chr2  | 202245415 | 202245415 | G  | C |
| ESCC-D4 | exonic   | <i>SORBS2</i>                                                                                                                                    | nonsynonymous SNV   | NM_001145675:c.G94A;p.D32N               |         | chr4  | 186572980 | 186572980 | C  | T |
| ESCC-D4 | exonic   | <i>ABCB4</i>                                                                                                                                     | nonsynonymous SNV   | NM_000443:c.C2144G;p.T715R               |         | chr7  | 87053289  | 87053289  | G  | C |
| ESCC-D4 | exonic   | <i>ZNF391</i>                                                                                                                                    | nonsynonymous SNV   | NM_001076781:c.G552C;p.Q184H             |         | chr6  | 27368701  | 27368701  | G  | C |
| ESCC-D4 | exonic   | <i>FGD2</i>                                                                                                                                      | nonsynonymous SNV   | NM_173558:c.G1691T;p.R564L               | 1473088 | chr6  | 36995290  | 36995290  | G  | T |
| ESCC-D4 | exonic   | <i>CHIT1</i>                                                                                                                                     | nonsynonymous SNV   | NM_001256125:c.G554A;p.G185E             |         | chr1  | 203192287 | 203192287 | C  | T |
| ESCC-D4 | exonic   | <i>HYDIN</i>                                                                                                                                     | nonsynonymous SNV   | NM_032821                                |         | chr16 | 70955042  | 70955042  | C  | G |
| ESCC-D4 | exonic   | <i>N4BP3</i>                                                                                                                                     | nonsynonymous SNV   | NM_015111                                |         | chr5  | 177546904 | 177546904 | G  | T |
| ESCC-D4 | exonic   | <i>EDARADD</i>                                                                                                                                   | nonsynonymous SNV   | NM_080738                                |         | chr1  | 236645718 | 236645718 | G  | C |
| ESCC-D4 | splicing | <i>RPS6KA6</i>                                                                                                                                   | splicing            | NM_014496                                |         | chrX  | 83362734  | 83362734  | C  | A |
| ESCC-D4 | exonic   | <i>SPEN</i>                                                                                                                                      | nonsynonymous SNV   | NM_015001                                |         | chr1  | 16259987  | 16259987  | G  | C |
| ESCC-D4 | exonic   | <i>SPECC1</i>                                                                                                                                    | nonsynonymous SNV   | NM_001033554:c.A446T;p.E149V             |         | chr17 | 20108051  | 20108051  | A  | T |
| ESCC-D5 | exonic   | <i>GPR98</i>                                                                                                                                     | nonsynonymous SNV   | NM_032119:c.G10796A;p.G3599D             |         | chr5  | 90041434  | 90041434  | G  | A |
| ESCC-D5 | exonic   | <i>ZNF167</i>                                                                                                                                    | nonsynonymous SNV   | NM_018651:c.A491G;p.E164G                |         | chr3  | 44607046  | 44607046  | A  | G |
| ESCC-D5 | exonic   | <i>TG</i>                                                                                                                                        | nonsynonymous SNV   | NM_003235:c.T1373A;p.L458H               |         | chr8  | 133898990 | 133898990 | T  | A |
| ESCC-D5 | exonic   | <i>NALCN</i>                                                                                                                                     | nonsynonymous SNV   | NM_052867:c.A1493C;p.K498T               |         | chr13 | 101881877 | 101881877 | T  | G |
| ESCC-D5 | exonic   | <i>PTPRD</i>                                                                                                                                     | stopgain SNV        | NM_001040712:c.C82T;p.R28X               |         | chr9  | 8636827   | 8636827   | G  | A |
| ESCC-D5 | exonic   | <i>ABCA8</i>                                                                                                                                     | stopgain SNV        | NM_007168:c.G1998A;p.W666X               |         | chr17 | 66913522  | 66913522  | C  | T |
| ESCC-D5 | exonic   | <i>CSN1S1</i>                                                                                                                                    | nonsynonymous SNV   | NM_001025104:c.C76T;p.R26C               |         | chr4  | 70799954  | 70799954  | C  | T |
| ESCC-D5 | exonic   | <i>RHBDD2</i>                                                                                                                                    | nonsynonymous SNV   | NM_001040456:c.G259A;p.A87T              |         | chr7  | 75511227  | 75511227  | G  | A |
| ESCC-D5 | exonic   | <i>DNAH7</i>                                                                                                                                     | nonsynonymous SNV   | NM_018897:c.A7517G;p.E2506G              |         | chr2  | 196726660 | 196726660 | T  | C |
| ESCC-D5 | exonic   | <i>HLA-DOA</i>                                                                                                                                   | nonsynonymous SNV   | NM_002119:c.T508A;p.L170M                |         | chr6  | 32975193  | 32975193  | A  | T |
| ESCC-D5 | exonic   | <i>NFXL1</i>                                                                                                                                     | nonsynonymous SNV   | NM_152995:c.C1676G;p.T559S               |         | chr4  | 47887663  | 47887663  | G  | C |
| ESCC-D5 | exonic   | <i>YME1L1</i>                                                                                                                                    | nonsynonymous SNV   | NM_001253866:c.A237T;p.E79D              |         | chr10 | 27434451  | 27434451  | T  | A |
| ESCC-D5 | splicing | <i>ARPP21(NM_016300:exon18:c.2032+1G&gt;C)</i>                                                                                                   |                     |                                          |         | chr3  | 35785458  | 35785458  | G  | C |
| ESCC-D5 | exonic   | <i>TNRC6C</i>                                                                                                                                    | nonsynonymous SNV   | NM_001142640:c.G2083A;p.G695R            |         | chr17 | 76047226  | 76047226  | G  | A |
| ESCC-D5 | exonic   | <i>MAP2</i>                                                                                                                                      | nonsynonymous SNV   | NM_002374:c.G825T;p.K275N                |         | chr2  | 210557719 | 210557719 | G  | T |
| ESCC-D5 | exonic   | <i>SPAG9</i>                                                                                                                                     | stopgain SNV        | NM_001251971:c.C553T;p.Q185X             |         | chr17 | 49097587  | 49097587  | G  | A |
| ESCC-D5 | exonic   | <i>ARMC1</i>                                                                                                                                     | nonsynonymous SNV   | NM_018120:c.G557T;p.R186L                |         | chr8  | 66517682  | 66517682  | C  | A |
| ESCC-D5 | exonic   | <i>DDX4</i>                                                                                                                                      | frameshift deletion | NM_001166534:c.1041_1042del;p.347_348del |         | chr5  | 55094272  | 55094273  | AA | - |
| ESCC-D5 | exonic   | <i>RNF139</i>                                                                                                                                    | nonsynonymous SNV   | NM_007218:c.G1616A;p.R539H               |         | chr8  | 125499506 | 125499506 | G  | A |
| ESCC-D5 | exonic   | <i>IKZF2</i>                                                                                                                                     | nonsynonymous SNV   | NM_016260:c.A122C;p.T408P                |         | chr2  | 213872443 | 213872443 | T  | G |
| ESCC-D5 | exonic   | <i>TBL1Y</i>                                                                                                                                     | nonsynonymous SNV   | NM_134258:c.C71T;p.S24L                  |         | chrY  | 6911033   | 6911033   | C  | T |
| ESCC-D5 | exonic   | <i>ZNF629</i>                                                                                                                                    | nonsynonymous SNV   | NM_001080417:c.G420T;p.Q140H             |         | chr16 | 30795229  | 30795229  | C  | A |
| ESCC-D5 | exonic   | <i>TEX2</i>                                                                                                                                      | nonsynonymous SNV   | NM_018469:c.G1880A;p.R627Q               |         | chr17 | 62271215  | 62271215  | C  | T |
| ESCC-D5 | exonic   | <i>PCDH5</i>                                                                                                                                     | nonsynonymous SNV   | NM_015669:c.C1955T;p.S652L               |         | chr5  | 140516971 | 140516971 | C  | T |
| ESCC-D5 | exonic   | <i>DIP2B</i>                                                                                                                                     | nonsynonymous SNV   | NM_173602:c.G3193A;p.G1065S              |         | chr12 | 51117011  | 51117011  | G  | A |
| ESCC-D5 | exonic   | <i>CACNA1E</i>                                                                                                                                   | nonsynonymous SNV   | NM_001205294:c.C3715T;p.R1239W           |         | chr1  | 181721319 | 181721319 | C  | T |
| ESCC-D5 | exonic   | <i>CD200R1</i>                                                                                                                                   | nonsynonymous SNV   | NM_138940:c.G359A;p.R120H                |         | chr3  | 112648129 | 112648129 | C  | T |

|         |        |                 |                      |                                        |                            |       |           |           |    |   |
|---------|--------|-----------------|----------------------|----------------------------------------|----------------------------|-------|-----------|-----------|----|---|
| ESCC-D5 | exonic | <i>GOLGB1</i>   | nonsynonymous SNV    | NM_001256486:c.C727T;p.L243F           |                            | chr3  | 121438537 | 121438537 | G  | A |
| ESCC-D5 | exonic | <i>ZNF583</i>   | nonsynonymous SNV    | NM_001159860:c.C224T;p.P75L            |                            | chr19 | 56925801  | 56925801  | C  | T |
| ESCC-D5 | exonic | <i>MYH6</i>     | nonsynonymous SNV    | NM_002471:c.C2716T;p.R906C             |                            | chr14 | 23863087  | 23863087  | G  | A |
| ESCC-D5 | exonic | <i>TP53</i>     | nonsynonymous SNV    | NM_001126115:c.G428A;p.C143Y           | 687596;753566;905938;90687 | chr17 | 7577114   | 7577114   | C  | T |
| ESCC-D5 | exonic | <i>CEACAM18</i> | nonsynonymous SNV    | NM_001080405:c.G836A;p.R279H           |                            | chr19 | 51984899  | 51984899  | G  | A |
| ESCC-D5 | exonic | <i>HDAC9</i>    | nonsynonymous SNV    | NM_058176:c.A2110G;p.T704A             |                            | chr7  | 18801855  | 18801855  | A  | G |
| ESCC-D5 | exonic | <i>CLIC5</i>    | nonsynonymous SNV    | NM_001114086:c.C1216T;p.R406C          |                            | chr6  | 45870842  | 45870842  | G  | A |
| ESCC-D5 | exonic | <i>EXOC1</i>    | nonsynonymous SNV    | NM_001024924:c.C1033T;p.R345W          |                            | chr4  | 56738083  | 56738083  | C  | T |
| ESCC-D5 | exonic | <i>ZFH4</i>     | nonsynonymous SNV    | NM_024721:c.C9527G;p.S3176C            |                            | chr8  | 77775477  | 77775477  | C  | G |
| ESCC-D5 | exonic | <i>SEPT2</i>    | nonsynonymous SNV    | NM_004404:c.C114G;p.F38L               |                            | chr2  | 242265512 | 242265512 | C  | G |
| ESCC-D5 | exonic | <i>SLC43A2</i>  | nonsynonymous SNV    | NM_152346:c.C1240T;p.R414W             |                            | chr17 | 1486608   | 1486608   | G  | A |
| ESCC-D5 | exonic | <i>FLNC</i>     | nonsynonymous SNV    | NM_001127487:c.T1403G;p.V468G          |                            | chr7  | 128478849 | 128478849 | T  | G |
| ESCC-D5 | exonic | <i>HIRA</i>     | nonsynonymous SNV    | NM_003325:c.G451A;p.V151M              |                            | chr22 | 19385557  | 19385557  | C  | T |
| ESCC-D5 | exonic | <i>CBX4</i>     | nonsynonymous SNV    | NM_003655:c.A982T;p.R328W              |                            | chr17 | 77808459  | 77808459  | T  | A |
| ESCC-D5 | exonic | <i>GPRIN3</i>   | nonsynonymous SNV    | NM_198281:c.C1676T;p.A559V             |                            | chr4  | 90169586  | 90169586  | G  | A |
| ESCC-D5 | exonic | <i>A2M</i>      | nonsynonymous SNV    | NM_000014:c.C1282T;p.R428C             |                            | chr12 | 9254255   | 9254255   | G  | A |
| ESCC-D5 | exonic | <i>STAM</i>     | nonsynonymous SNV    | NM_003473:c.A659G;p.D220G              |                            | chr10 | 17737171  | 17737171  | A  | G |
| ESCC-D5 | exonic | <i>HCN2</i>     | nonsynonymous SNV    | NM_001194:c.A1099G;p.I367V             |                            | chr19 | 605103    | 605103    | A  | G |
| ESCC-D5 | exonic | <i>TAF1L</i>    | frameshift insertion | NM_153809:c.1995_1996insA;p.K665fs     |                            | chr9  | 32633583  | 32633583  | -  | T |
| ESCC-D5 | exonic | <i>KIAA1804</i> | stopgain SNV         | NM_032435:c.C2278T;p.R760X             |                            | chr1  | 233515030 | 233515030 | C  | T |
| ESCC-D5 | exonic | <i>TMEM119</i>  | nonsynonymous SNV    | NM_181724:c.G700A;p.E234K              |                            | chr12 | 108985460 | 108985460 | C  | T |
| ESCC-D5 | exonic | <i>TTN</i>      | nonsynonymous SNV    | NM_003319:c.G2122T;p.A708S             |                            | chr2  | 179650685 | 179650685 | C  | A |
| ESCC-D5 | exonic | <i>CCDC33</i>   | nonsynonymous SNV    | NM_025055:c.A98C;p.K33T                |                            | chr15 | 74536402  | 74536402  | A  | C |
| ESCC-D5 | exonic | <i>CCDC33</i>   | nonsynonymous SNV    | NM_025055:c.G99T;p.K33N                |                            | chr15 | 74536403  | 74536403  | G  | T |
| ESCC-D5 | exonic | <i>ANKRD36</i>  | nonsynonymous SNV    | NM_001164315:c.C643A;p.L215I           |                            | chr2  | 97790246  | 97790246  | C  | A |
| ESCC-D5 | exonic | <i>CDC20</i>    | nonsynonymous SNV    | NM_001255:c.A490C;p.T164P              |                            | chr1  | 43825702  | 43825702  | A  | C |
| ESCC-D5 | exonic | <i>FTO</i>      | nonsynonymous SNV    | NM_001080432:c.C932T;p.A311V           |                            | chr16 | 53907734  | 53907734  | C  | T |
| ESCC-D5 | exonic | <i>PCHDB15</i>  | nonsynonymous SNV    | NM_018935:c.A2009C;p.Y670S             |                            | chr5  | 140627155 | 140627155 | A  | C |
| ESCC-D7 | exonic | <i>TTN</i>      | nonsynonymous SNV    | NM_003319:c.C51094T;p.P17032S          |                            | chr2  | 179432570 | 179432570 | G  | A |
| ESCC-D7 | exonic | <i>TECTA</i>    | nonsynonymous SNV    | NM_005422:c.G1421A;p.R474H             |                            | chr11 | 120996228 | 120996228 | G  | A |
| ESCC-D7 | exonic | <i>PPF1A2</i>   | nonsynonymous SNV    | NM_001220479:c.A669T;p.Q223H           |                            | chr12 | 81746924  | 81746924  | T  | A |
| ESCC-D7 | exonic | <i>FAT3</i>     | nonsynonymous SNV    | NM_001008781:c.G1706T;p.G569V          |                            | chr11 | 92086984  | 92086984  | G  | T |
| ESCC-D7 | exonic | <i>MRPL20</i>   | nonsynonymous SNV    | NM_017971:c.C142G;p.R48G               |                            | chr1  | 1342345   | 1342345   | G  | C |
| ESCC-D7 | exonic | <i>SNIP2</i>    | nonsynonymous SNV    | NM_006750:c.T836C;p.I279T              |                            | chr16 | 69293994  | 69293994  | T  | C |
| ESCC-D7 | exonic | <i>FSIP2</i>    | nonsynonymous SNV    | NM_173651:c.T6859A;p.C2287S            |                            | chr2  | 186658455 | 186658455 | T  | A |
| ESCC-D7 | exonic | <i>MAP3K15</i>  | nonsynonymous SNV    | NM_001001671:c.C1625G;p.P542R          |                            | chrX  | 19431548  | 19431548  | G  | C |
| ESCC-D7 | exonic | <i>MYO16</i>    | nonsynonymous SNV    | NM_001198950:c.T2867A;p.M956K          |                            | chr13 | 109699334 | 109699334 | T  | A |
| ESCC-D7 | exonic | <i>PRRC2C</i>   | nonsynonymous SNV    | NM_015172:c.C7295T;p.P2432L            |                            | chr1  | 171548995 | 171548995 | C  | T |
| ESCC-D7 | exonic | <i>CDH12</i>    | nonsynonymous SNV    | NM_004061:c.G1969A;p.V657I             |                            | chr5  | 21752262  | 21752262  | C  | T |
| ESCC-D7 | exonic | <i>ZC3H6</i>    | nonsynonymous SNV    | NM_198581:c.G484A;p.E162K              |                            | chr2  | 113067609 | 113067609 | G  | A |
| ESCC-D7 | exonic | <i>UFL1</i>     | nonsynonymous SNV    | NM_015323:c.C1919G;p.S640C             |                            | chr6  | 96999733  | 96999733  | C  | G |
| ESCC-D7 | exonic | <i>SLCO1C1</i>  | nonsynonymous SNV    | NM_001145944:c.A1576T;p.S526C          |                            | chr12 | 20903740  | 20903740  | A  | T |
| ESCC-D7 | exonic | <i>NOTCH1</i>   | frameshift deletion  | NM_017617:c.G161_161del;p.2054_2054del |                            | chr9  | 139393369 | 139393370 | TT | - |
| ESCC-D7 | exonic | <i>GRIA2</i>    | nonsynonymous SNV    | NM_000826:c.G1744A;p.E582K             |                            | chr4  | 158257799 | 158257799 | G  | A |
| ESCC-D7 | exonic | <i>NEK10</i>    | stopgain SNV         | NM_199347:c.C1093T;p.R365X             |                            | chr3  | 27343262  | 27343262  | G  | A |
| ESCC-D7 | exonic | <i>TTN</i>      | nonsynonymous SNV    | NM_003319:c.C22000T;p.H7334Y           |                            | chr2  | 179478929 | 179478929 | G  | A |
| ESCC-D7 | exonic | <i>ZNF429</i>   | nonsynonymous SNV    | NM_001001415:c.A1184C;p.E395A          |                            | chr19 | 21720039  | 21720039  | A  | C |
| ESCC-D7 | exonic | <i>ZNF24</i>    | nonsynonymous SNV    | NM_006965:c.C137G;p.P46R               |                            | chr18 | 32920478  | 32920478  | G  | C |
| ESCC-D7 | exonic | <i>LRRTM4</i>   | nonsynonymous SNV    | NM_001134745:c.C1426A;p.Q476K          |                            | chr2  | 77745569  | 77745569  | G  | T |
| ESCC-D7 | exonic | <i>NAV1</i>     | nonsynonymous SNV    | NM_001167738:c.G2881A;p.E961K          |                            | chr1  | 201777855 | 201777855 | G  | A |
| ESCC-D7 | exonic | <i>NUP210</i>   | stopgain SNV         | NM_024923:c.C3319T;p.Q1107X            |                            | chr3  | 13381506  | 13381506  | G  | A |
| ESCC-D7 | exonic | <i>CLCN4</i>    | nonsynonymous SNV    | NM_001830:c.A2182T;p.T728S             |                            | chrX  | 10188907  | 10188907  | A  | T |
| ESCC-D7 | exonic | <i>UBE2O</i>    | nonsynonymous SNV    | NM_022066:c.C2888T;p.A963V             |                            | chr17 | 74391864  | 74391864  | G  | A |
| ESCC-D7 | exonic | <i>RLN1</i>     | stopgain SNV         | NM_006911:c.C484T;p.R162X              |                            | chr9  | 5335325   | 5335325   | G  | A |

|         |                 |                      |                      |                                     |                            |       |           |           |   |   |
|---------|-----------------|----------------------|----------------------|-------------------------------------|----------------------------|-------|-----------|-----------|---|---|
| ESCC-D7 | exonic          | <i>CRLF3</i>         | nonsynonymous SNV    | NM_015986:c.C957A:p.F319L           |                            | chr17 | 29119460  | 29119460  | G | T |
| ESCC-D7 | exonic          | <i>FN1</i>           | nonsynonymous SNV    | NM_002026:c.C1169T:p.S390L          |                            | chr2  | 216288916 | 216288916 | G | A |
| ESCC-D7 | exonic          | <i>NPAS4</i>         | nonsynonymous SNV    | NM_178864:c.G484A:p.A162T           |                            | chr11 | 66190198  | 66190198  | G | A |
| ESCC-D7 | exonic          | <i>TP53</i>          | nonsynonymous SNV    | NM_001126115:c.C241T:p.R141C        | 684062;687505;687562;68799 | chr17 | 7577121   | 7577121   | G | A |
| ESCC-D7 | exonic          | <i>TRIM60</i>        | nonsynonymous SNV    | NM_152620:c.G1342A:p.V448I          |                            | chr4  | 165962566 | 165962566 | G | A |
| ESCC-D7 | exonic;splicing | <i>SECISBP2L;SEC</i> | nonsynonymous SNV    | NM_014701:c.T1115G:p.V372G          |                            | chr15 | 49309746  | 49309746  | A | C |
| ESCC-D7 | exonic          | <i>GPHN</i>          | nonsynonymous SNV    | NM_001024218:c.A2074G:p.T692A       |                            | chr14 | 67646388  | 67646388  | A | G |
| ESCC-D7 | exonic          | <i>COL22A1</i>       | nonsynonymous SNV    | NM_152888:c.G2284T:p.G762C          |                            | chr8  | 139734296 | 139734296 | C | A |
| ESCC-D7 | exonic          | <i>ORM2</i>          | nonsynonymous SNV    | NM_001004688:c.A177T:p.Q6L          | 1474850                    | chr1  | 248343304 | 248343304 | A | T |
| ESCC-D7 | exonic          | <i>RGNEF</i>         | nonsynonymous SNV    | NM_001244364:c.G1732T:p.D578Y       |                            | chr5  | 73168928  | 73168928  | G | T |
| ESCC-D7 | exonic          | <i>ADD1</i>          | nonsynonymous SNV    | NM_001119:c.C562G:p.L188V           |                            | chr4  | 2895791   | 2895791   | C | G |
| ESCC-D7 | exonic          | <i>TRIM37</i>        | nonsynonymous SNV    | NM_001005207:c.G1096A:p.D366N       |                            | chr17 | 57134339  | 57134339  | C | T |
| ESCC-D7 | exonic          | <i>USP31</i>         | nonsynonymous SNV    | NM_020718:c.C2020T:p.H674Y          |                            | chr16 | 23091423  | 23091423  | G | A |
| ESCC-D7 | exonic          | <i>ZNF835</i>        | nonsynonymous SNV    | NM_001005850:c.C1514A:p.P505Q       |                            | chr19 | 57175053  | 57175053  | G | T |
| ESCC-D7 | exonic          | <i>PLA2G7</i>        | frameshift insertion | NM_001168357:c.949_950insT;p.L317fs |                            | chr6  | 46675819  | 46675819  | - | A |
| ESCC-D7 | exonic          | <i>PROX1</i>         | nonsynonymous SNV    | NM_002763:c.G793A:p.D265N           |                            | chr1  | 214170671 | 214170671 | G | A |
| ESCC-D7 | exonic          | <i>XIRP2</i>         | nonsynonymous SNV    | NM_001199144:c.G3610C:p.E1204Q      |                            | chr2  | 168102178 | 168102178 | G | C |
| ESCC-D7 | exonic          | <i>PCDH11X</i>       | nonsynonymous SNV    | NM_001168360:c.G1417C:p.V473L       |                            | chrX  | 91132656  | 91132656  | G | C |
| ESCC-D7 | exonic          | <i>ACOT12</i>        | nonsynonymous SNV    | NM_130767:c.C703T:p.R244C           |                            | chr5  | 80641747  | 80641747  | G | A |
| ESCC-D7 | exonic          | <i>TSR1</i>          | nonsynonymous SNV    | NM_018128:c.C247T:p.H83Y            |                            | chr17 | 2238979   | 2238979   | G | A |
| ESCC-D7 | exonic          | <i>TAX1BP1</i>       | nonsynonymous SNV    | NM_001206902:c.C478G:p.H160D        |                            | chr7  | 27827133  | 27827133  | C | G |
| ESCC-D7 | exonic          | <i>TRIP10</i>        | nonsynonymous SNV    | NM_004240:c.C1306G:p.P436A          |                            | chr19 | 6750381   | 6750381   | C | G |
| ESCC-D7 | exonic          | <i>PTPN22</i>        | nonsynonymous SNV    | NM_012411:c.G1051T:p.G351W          |                            | chr1  | 114380806 | 114380806 | C | A |
| ESCC-D7 | exonic          | <i>OTOA</i>          | nonsynonymous SNV    | NM_001161683:c.A629G:p.N210S        |                            | chr16 | 21712234  | 21712234  | A | G |
| ESCC-D7 | exonic          | <i>FAM75D4</i>       | nonsynonymous SNV    | NM_001145197:c.C2641T:p.H881Y       |                            | chr9  | 84547717  | 84547717  | C | T |
| ESCC-D7 | exonic          | <i>TXNDC16</i>       | nonsynonymous SNV    | NM_001160047:c.G1087C:p.D363H       |                            | chr14 | 52955087  | 52955087  | C | G |
| ESCC-D7 | exonic          | <i>NFAT5</i>         | nonsynonymous SNV    | NM_006599:c.C4204G:p.Q1402E         |                            | chr16 | 69727986  | 69727986  | C | G |
| ESCC-D7 | exonic          | <i>MAST4</i>         | stopgain SNV         | NM_015183:c.C3641G:p.S1214X         |                            | chr5  | 66459215  | 66459215  | C | G |
| ESCC-D7 | exonic          | <i>FAM47A</i>        | nonsynonymous SNV    | NM_203408:c.G1805T:p.R602I          |                            | chrX  | 34148591  | 34148591  | C | A |
| ESCC-D7 | exonic          | <i>UF1C</i>          | nonsynonymous SNV    | NM_016406:c.G220A:p.D74N            |                            | chr1  | 161127072 | 161127072 | G | A |
| ESCC-D7 | exonic          | <i>MLXIP</i>         | nonsynonymous SNV    | NM_014938:c.G1095C:p.E365D          |                            | chr12 | 122617897 | 122617897 | G | C |
| ESCC-D7 | exonic          | <i>TNFRSF12A</i>     | nonsynonymous SNV    | NM_016639:c.G308A:p.R103Q           |                            | chr16 | 3071664   | 3071664   | G | A |
| ESCC-D7 | exonic          | <i>IGSF10</i>        | stopgain SNV         | NM_178822:c.C3296A:p.S1099X         |                            | chr3  | 151164473 | 151164473 | G | T |
| ESCC-D7 | exonic          | <i>ZNF98</i>         | nonsynonymous SNV    | NM_001098626:c.C1493T:p.A498V       |                            | chr19 | 22574544  | 22574544  | G | A |
| ESCC-D7 | exonic          | <i>SHANK1</i>        | nonsynonymous SNV    | NM_016148:c.G61A:p.E21K             |                            | chr19 | 51220116  | 51220116  | C | T |
| ESCC-D7 | exonic          | <i>COL4A4</i>        | nonsynonymous SNV    | NM_000092:c.C4363A:p.P1455T         |                            | chr2  | 227875188 | 227875188 | G | T |
| ESCC-D7 | exonic          | <i>TTBK2</i>         | nonsynonymous SNV    | NM_173500:c.G3557A:p.G1186E         |                            | chr15 | 43038171  | 43038171  | C | T |
| ESCC-D7 | exonic          | <i>ZNF98</i>         | nonsynonymous SNV    | NM_001098626:c.G1486T:p.G496C       |                            | chr19 | 22574551  | 22574551  | C | A |
| ESCC-D7 | exonic          | <i>EMILIN2</i>       | nonsynonymous SNV    | NM_032048:c.T1727C:p.V576A          |                            | chr18 | 2891852   | 2891852   | T | C |
| ESCC-D7 | exonic          | <i>HUWE1</i>         | nonsynonymous SNV    | NM_031407:c.G94A:p.E32K             |                            | chrX  | 53675205  | 53675205  | C | T |
| ESCC-D7 | exonic          | <i>UBE2Q1</i>        | nonsynonymous SNV    | NM_017582:c.G764A:p.R255Q           |                            | chr1  | 154525262 | 154525262 | C | T |
| ESCC-D8 | exonic          | <i>GARNL3</i>        | nonsynonymous SNV    | NM_032293:c.C1822T:p.R608W          |                            | chr9  | 130117638 | 130117638 | C | T |
| ESCC-D8 | exonic;splicing | <i>SLC22A23;SLC2</i> | nonsynonymous SNV    | NM_015482:c.T757A:p.W253R           |                            | chr6  | 3415987   | 3415987   | A | T |
| ESCC-D8 | exonic          | <i>ADAM2</i>         | nonsynonymous SNV    | NM_001464:c.G221T:p.S74I            |                            | chr8  | 39682384  | 39682384  | C | A |
| ESCC-D8 | exonic          | <i>CNOT6L</i>        | stopgain SNV         | NM_144571:c.C538T:p.R180X           |                            | chr4  | 78669491  | 78669491  | G | A |
| ESCC-D8 | exonic          | <i>SMO</i>           | frameshift deletion  | NM_005631:c.1217delC;p.A406fs       |                            | chr7  | 128846381 | 128846381 | C | - |
| ESCC-D8 | exonic          | <i>EV2</i>           | nonsynonymous SNV    | NM_001166136:c.C116T:p.S39F         |                            | chr4  | 5696156   | 5696156   | G | A |
| ESCC-D8 | exonic          | <i>SAMD9L</i>        | nonsynonymous SNV    | NM_152703:c.G1076A:p.R359Q          |                            | chr7  | 92764209  | 92764209  | C | T |
| ESCC-D8 | exonic          | <i>SKA2</i>          | nonsynonymous SNV    | NM_182620:c.C203A:p.A68D            |                            | chr17 | 57196774  | 57196774  | G | T |
| ESCC-D8 | exonic          | <i>INTS9</i>         | frameshift deletion  | NM_001145159:c.1859delA;p.E620fs    |                            | chr8  | 28625718  | 28625718  | T | - |
| ESCC-D8 | exonic          | <i>TAF1L</i>         | nonsynonymous SNV    | NM_153809:c.A1387G:p.N463D          |                            | chr9  | 32634191  | 32634191  | T | C |
| ESCC-D8 | exonic          | <i>TP53</i>          | stopgain SNV         | NM_001126115:c.C241T:p.R81X         | 687983;905938;905971;90700 | chr17 | 7578212   | 7578212   | G | A |
| ESCC-D8 | exonic          | <i>ZNF189</i>        | nonsynonymous SNV    | NM_003452:c.G913C:p.E305Q           |                            | chr9  | 104170963 | 104170963 | G | C |
| ESCC-D8 | exonic          | <i>TNKS</i>          | stopgain SNV         | NM_003747:c.C1552T:p.Q518X          |                            | chr8  | 9565976   | 9565976   | C | T |

|         |                 |                                                                                                                                                  |                     |                                |  |       |           |           |   |   |
|---------|-----------------|--------------------------------------------------------------------------------------------------------------------------------------------------|---------------------|--------------------------------|--|-------|-----------|-----------|---|---|
| ESCC-D8 | exonic          | <i>PPFIA2</i>                                                                                                                                    | nonsynonymous SNV   | NM_001220478:c.G937C;p.E313Q   |  | chr12 | 81768445  | 81768445  | C | G |
| ESCC-D8 | exonic          | <i>TTC21B</i>                                                                                                                                    | nonsynonymous SNV   | NM_024753:c.C533G;p.T178S      |  | chr2  | 166799748 | 166799748 | G | C |
| ESCC-D8 | exonic          | <i>RSP1</i>                                                                                                                                      | nonsynonymous SNV   | NM_016578:c.G313A;p.E105K      |  | chr11 | 77458140  | 77458140  | C | T |
| ESCC-D8 | exonic          | <i>UZAF1</i>                                                                                                                                     | nonsynonymous SNV   | NM_001025203:c.C443T;p.T148M   |  | chr21 | 44514804  | 44514804  | G | A |
| ESCC-D8 | exonic/splicing | <i>LRP1B-LRP1B</i>                                                                                                                               | nonsynonymous SNV   | NM_018557:c.A593C;p.E198A      |  | chr2  | 141987009 | 141987009 | T | G |
| ESCC-D8 | exonic          | <i>APIB1</i>                                                                                                                                     | nonsynonymous SNV   | NM_001127:c.G108A;p.A362T      |  | chr22 | 29747231  | 29747231  | C | T |
| ESCC-D8 | exonic          | <i>PTCHD4</i>                                                                                                                                    | nonsynonymous SNV   | NM_001013732:c.C1076A;p.T359K  |  | chr6  | 47847504  | 47847504  | G | T |
| ESCC-D8 | exonic          | <i>ZNF99</i>                                                                                                                                     | nonsynonymous SNV   | NM_001080409:c.C823G;p.H275D   |  | chr19 | 22941888  | 22941888  | G | C |
| ESCC-D8 | exonic          | <i>DMXL1</i>                                                                                                                                     | nonsynonymous SNV   | NM_005509:c.A4536T;p.L1512F    |  | chr5  | 118486058 | 118486058 | A | T |
| ESCC-D8 | exonic          | <i>HHLI2</i>                                                                                                                                     | nonsynonymous SNV   | NM_024746:c.G1357C;p.V453L     |  | chr1  | 222713445 | 222713445 | C | G |
| ESCC-D8 | exonic          | <i>KIF14</i>                                                                                                                                     | nonsynonymous SNV   | NM_014875:c.C4870T;p.R1624C    |  | chr1  | 200522593 | 200522593 | G | A |
| ESCC-D8 | exonic          | <i>ABHD13</i>                                                                                                                                    | nonsynonymous SNV   | NM_032859:c.G572C;p.G191A      |  | chr13 | 108882138 | 108882138 | G | C |
| ESCC-D8 | exonic          | <i>WDR92</i>                                                                                                                                     | nonsynonymous SNV   | NM_138458:c.T1007G;p.L336R     |  | chr2  | 68358437  | 68358437  | A | C |
| ESCC-D8 | exonic          | <i>NCOA2</i>                                                                                                                                     | nonsynonymous SNV   | NM_006540:c.G2570C;p.G857A     |  | chr8  | 71060543  | 71060543  | C | G |
| ESCC-D8 | exonic          | <i>HIST1H2BG</i>                                                                                                                                 | nonsynonymous SNV   | NM_003518:c.G214C;p.E72Q       |  | chr6  | 26216658  | 26216658  | C | G |
| ESCC-D8 | exonic          | <i>DISCAM1</i>                                                                                                                                   | nonsynonymous SNV   | NM_020693:c.G3418A;p.E1140K    |  | chr11 | 117335685 | 117335685 | C | T |
| ESCC-D8 | exonic          | <i>BCAT1</i>                                                                                                                                     | nonsynonymous SNV   | NM_001178091:c.G60C;p.E20D     |  | chr12 | 25054766  | 25054766  | C | G |
| ESCC-D8 | splicing        | <i>BCL7B(NM_001707:exon5:c.436+1G&gt;A)</i>                                                                                                      |                     |                                |  | chr7  | 72954211  | 72954211  | C | T |
| ESCC-D8 | exonic          | <i>OXR1</i>                                                                                                                                      | nonsynonymous SNV   | NM_181354:c.G493C;p.D165H      |  | chr8  | 107696576 | 107696576 | G | C |
| ESCC-D8 | exonic          | <i>MKI67</i>                                                                                                                                     | nonsynonymous SNV   | NM_001145966:c.C4357A;p.P1453T |  | chr10 | 129904667 | 129904667 | G | T |
| ESCC-D8 | exonic          | <i>DCAF1</i>                                                                                                                                     | nonsynonymous SNV   | NM_001163484:c.A854G;p.N285S   |  | chr14 | 24588773  | 24588773  | A | G |
| ESCC-D8 | exonic          | <i>ADCY8</i>                                                                                                                                     | nonsynonymous SNV   | NM_001115:c.A1091C;p.E364A     |  | chr8  | 132002658 | 132002658 | T | G |
| ESCC-D8 | exonic          | <i>SPAG1</i>                                                                                                                                     | nonsynonymous SNV   | NM_003114:c.G2278A;p.E760K     |  | chr8  | 101251630 | 101251630 | G | A |
| ESCC-D8 | exonic          | <i>FNIP1</i>                                                                                                                                     | nonsynonymous SNV   | NM_001008738:c.G2491A;p.D831N  |  | chr5  | 131007562 | 131007562 | C | T |
| ESCC-D8 | exonic          | <i>CEP350</i>                                                                                                                                    | nonsynonymous SNV   | NM_014810:c.G5555A;p.R1852H    |  | chr1  | 180034395 | 180034395 | G | A |
| ESCC-D8 | exonic          | <i>COL12A1</i>                                                                                                                                   | nonsynonymous SNV   | NM_004370:c.G2148T;p.E716D     |  | chr6  | 75890671  | 75890671  | C | A |
| ESCC-D8 | exonic          | <i>MTHFR</i>                                                                                                                                     | nonsynonymous SNV   | NM_005957:c.G1034A;p.R345H     |  | chr1  | 11854918  | 11854918  | C | T |
| ESCC-D8 | exonic          | <i>WDR70</i>                                                                                                                                     | nonsynonymous SNV   | NM_018034:c.C434T;p.P145L      |  | chr5  | 37396614  | 37396614  | C | T |
| ESCC-D8 | exonic          | <i>ORC5</i>                                                                                                                                      | nonsynonymous SNV   | NM_002553:c.G1226C;p.C409S     |  | chr7  | 103777264 | 103777264 | C | G |
| ESCC-D8 | exonic          | <i>CASP8AP2</i>                                                                                                                                  | nonsynonymous SNV   | NM_001137667:c.C464G;p.T155R   |  | chr6  | 90571892  | 90571892  | C | G |
| ESCC-D8 | exonic          | <i>DSPP</i>                                                                                                                                      | nonsynonymous SNV   | NM_014208:c.A961C;p.K321Q      |  | chr4  | 88534299  | 88534299  | A | C |
| ESCC-D8 | exonic          | <i>LDOLIL</i>                                                                                                                                    | nonsynonymous SNV   | NM_032287:c.C709T;p.R237W      |  | chr22 | 44892728  | 44892728  | G | A |
| ESCC-D8 | exonic          | <i>AMIGO2</i>                                                                                                                                    | stopgain SNV        | NM_181847:c.C901T;p.Q301X      |  | chr12 | 47471885  | 47471885  | G | A |
| ESCC-D8 | exonic          | <i>SCN11A</i>                                                                                                                                    | nonsynonymous SNV   | NM_014139:c.C2178A;p.S726R     |  | chr3  | 38938561  | 38938561  | G | T |
| ESCC-D8 | exonic          | <i>TTN</i>                                                                                                                                       | nonsynonymous SNV   | NM_133379:c.G15653A;p.R5218Q   |  | chr2  | 179611474 | 179611474 | C | T |
| ESCC-D8 | exonic          | <i>TNF</i>                                                                                                                                       | nonsynonymous SNV   | NM_000594:c.C85G;p.R29G        |  | chr6  | 31543603  | 31543603  | C | G |
| ESCC-D8 | exonic          | <i>HSPBAP1</i>                                                                                                                                   | nonsynonymous SNV   | NM_024610:c.G1432T;p.V478L     |  | chr3  | 122459227 | 122459227 | C | A |
| ESCC-D8 | exonic          | <i>SHAH3</i>                                                                                                                                     | nonsynonymous SNV   | NM_198849:c.C194T;p.P65L       |  | chr13 | 46358134  | 46358134  | G | A |
| ESCC-D8 | exonic          | <i>AKAP6</i>                                                                                                                                     | nonsynonymous SNV   | NM_004274:c.C4267T;p.P1423S    |  | chr14 | 33291286  | 33291286  | C | T |
| ESCC-D8 | splicing        | <i>SLCO1C1(NM_001145946:exon8:c.677-1G&gt;A,NM_001145945:exon7:c.530-1G&gt;A,NM_017435:exon7:c.677-1G&gt;A,NM_001145944:exon5:c.323-1G&gt;A)</i> |                     |                                |  | chr12 | 20870065  | 20870065  | G | A |
| ESCC-D8 | exonic          | <i>PXN</i>                                                                                                                                       | nonsynonymous SNV   | NM_001243756:c.G1480A;p.A494T  |  | chr12 | 120651716 | 120651716 | C | T |
| ESCC-D8 | exonic          | <i>SPEF2</i>                                                                                                                                     | frameshift deletion | NM_024867:c.2649delA;p.A883fs  |  | chr5  | 35705894  | 35705894  | A | - |
| ESCC-D8 | exonic          | <i>4-Mar</i>                                                                                                                                     | stopgain SNV        | NM_020814:c.C1201T;p.R401X     |  | chr2  | 217124067 | 217124067 | G | A |
| ESCC-D8 | exonic          | <i>C5ARI</i>                                                                                                                                     | unknown             | UNKNOWN                        |  | chr19 | 47823638  | 47823638  | G | A |
| ESCC-D8 | exonic          | <i>ABCA7</i>                                                                                                                                     | nonsynonymous SNV   | NM_019112:c.G5323T;p.D1775Y    |  | chr19 | 1058862   | 1058862   | G | T |
| ESCC-D8 | exonic          | <i>SPTB</i>                                                                                                                                      | nonsynonymous SNV   | NM_000347:c.C733A;p.L245M      |  | chr14 | 65268033  | 65268033  | G | T |
| ESCC-D8 | exonic          | <i>GTF3C4</i>                                                                                                                                    | nonsynonymous SNV   | NM_012204:c.C478A;p.P160T      |  | chr9  | 135553484 | 135553484 | C | A |
| ESCC-D8 | exonic          | <i>FAM135B</i>                                                                                                                                   | nonsynonymous SNV   | NM_015912:c.A133T;p.S45C       |  | chr8  | 139323108 | 139323108 | T | A |
| ESCC-D8 | exonic          | <i>KCNQ2</i>                                                                                                                                     | stopgain SNV        | NM_004518:c.C1624T;p.Q542X     |  | chr20 | 62044858  | 62044858  | G | A |
| ESCC-D8 | exonic          | <i>KIAA1109</i>                                                                                                                                  | nonsynonymous SNV   | NM_015312:c.C11540T;p.A3847V   |  | chr4  | 123254858 | 123254858 | C | T |
| ESCC-D8 | exonic          | <i>HCLS1</i>                                                                                                                                     | nonsynonymous SNV   | NM_005335:c.G759T;p.E253D      |  | chr3  | 121353198 | 121353198 | C | A |
| ESCC-D8 | splicing        | <i>CAMSAP3(NM_001080429:exon16:c.3293+1G&gt;C,NM_020902:exon14:c.3212+1G&gt;C)</i>                                                               |                     |                                |  | chr19 | 7681509   | 7681509   | G | C |
| ESCC-D8 | exonic          | <i>SYNJ1</i>                                                                                                                                     | nonsynonymous SNV   | NM_001160306:c.G2359A;p.D787N  |  | chr21 | 34030113  | 34030113  | C | T |
| ESCC-D8 | exonic          | <i>PTGIS</i>                                                                                                                                     | nonsynonymous SNV   | NM_000961:c.C1109A;p.A370E     |  | chr20 | 48129714  | 48129714  | G | T |



|          |                 |                      |                        |                                     |                            |       |           |           |     |   |
|----------|-----------------|----------------------|------------------------|-------------------------------------|----------------------------|-------|-----------|-----------|-----|---|
| ESCC-D8  | exonic;splicing | <i>RALGDS;RALGD</i>  | nonsynonymous SNV      | NM_001042368:c.C1505T;p.T502M       |                            | chr9  | 135979651 | 135979651 | G   | A |
| ESCC-D8  | exonic          | <i>ZNF365</i>        | nonsynonymous SNV      | NM_199452:c.G398C;p.S133T           |                            | chr10 | 64416162  | 64416162  | G   | C |
| ESCC-D8  | exonic          | <i>NLRP1</i>         | nonsynonymous SNV      | NM_033007:c.G3762T;p.L1254F         |                            | chr17 | 5421139   | 5421139   | C   | A |
| ESCC-D8  | exonic          | <i>MCCC2</i>         | nonsynonymous SNV      | NM_022132:c.C730A;p.P244T           |                            | chr5  | 70922572  | 70922572  | C   | A |
| ESCC-D8  | exonic          | <i>TRAP1</i>         | nonsynonymous SNV      | NM_005879:c.A808C;p.K270Q           |                            | chr3  | 49877281  | 49877281  | T   | G |
| ESCC-D8  | exonic          | <i>KCND3</i>         | nonsynonymous SNV      | NM_004980:c.G10A;p.G4R              |                            | chr1  | 112525339 | 112525339 | C   | T |
| ESCC-D8  | exonic          | <i>SEC14L5</i>       | nonsynonymous SNV      | NM_014692:c.G1558A;p.G520R          |                            | chr16 | 5057473   | 5057473   | G   | A |
| ESCC-D8  | exonic          | <i>SLC35G5</i>       | nonsynonymous SNV      | NM_054028:c.C569T;p.T190I           |                            | chr8  | 11189184  | 11189184  | C   | T |
| ESCC-D8  | exonic          | <i>GPR88</i>         | frameshift insertion   | NM_022049:c.372_373insA;p.L124fs    |                            | chr1  | 101004894 | 101004894 | -   | A |
| ESCC-D8  | exonic          | <i>TOLLIP</i>        | nonsynonymous SNV      | NM_019009:c.G619A;p.A207T           |                            | chr11 | 1298475   | 1298475   | C   | T |
| ESCC-D8  | exonic          | <i>DDAH2</i>         | nonsynonymous SNV      | NM_013974:c.G305A;p.G102E           |                            | chr6  | 31696515  | 31696515  | C   | T |
| ESCC-D9  | exonic          | <i>RB1</i>           | stopgain SNV           | NM_000321:c.C751T;p.R251X           | 687562;808300;808452;90684 | chr13 | 48936983  | 48936983  | C   | T |
| ESCC-D9  | exonic          | <i>CLTC</i>          | nonsynonymous SNV      | NM_004859:c.G1042C;p.A348P          |                            | chr17 | 57737824  | 57737824  | G   | C |
| ESCC-D9  | exonic          | <i>ZNF836</i>        | nonsynonymous SNV      | NM_001102657:c.A1320T;p.K440N       |                            | chr19 | 52659616  | 52659616  | T   | A |
| ESCC-D9  | exonic          | <i>DNAH6</i>         | nonsynonymous SNV      | NM_001370:c.C10981T;p.R3661C        |                            | chr2  | 85012761  | 85012761  | C   | T |
| ESCC-D9  | exonic          | <i>SLTM</i>          | nonsynonymous SNV      | NM_001013843:c.A1240G;p.M414V       |                            | chr15 | 59186715  | 59186715  | T   | C |
| ESCC-D9  | exonic          | <i>TP53</i>          | stopgain SNV           | NM_001126115:c.C520T;p.R174X        | 749714;749727;753566;90593 | chr17 | 7577022   | 7577022   | G   | A |
| ESCC-D9  | exonic          | <i>C9orf103</i>      | nonsynonymous SNV      | NM_001190727:c.T173C;p.F58S         |                            | chr9  | 86256498  | 86256498  | T   | C |
| ESCC-D9  | exonic;splicing | <i>CETP;CETP</i>     | nonsynonymous SNV      | NM_000078:c.T140A;p.D469E           |                            | chr16 | 57017323  | 57017323  | T   | A |
| ESCC-D9  | exonic          | <i>PHKB</i>          | nonsynonymous SNV      | NM_000293:c.A193T;p.S65C            |                            | chr16 | 47533693  | 47533693  | A   | T |
| ESCC-D9  | exonic          | <i>HIST2H2BF</i>     | unknown                | UNKNOWN                             |                            | chr1  | 149399121 | 149399121 | G   | A |
| ESCC-D9  | exonic          | <i>ENPP1</i>         | stopgain SNV           | NM_006208:c.C396A;p.C132X           |                            | chr6  | 132171212 | 132171212 | C   | A |
| ESCC-D9  | exonic          | <i>HEG1</i>          | nonsynonymous SNV      | NM_020733:c.G1420A;p.A474T          |                            | chr3  | 124738274 | 124738274 | C   | T |
| ESCC-D9  | exonic          | <i>ENPP3</i>         | nonsynonymous SNV      | NM_005021:c.T1465C;p.F489L          |                            | chr6  | 132039864 | 132039864 | T   | C |
| ESCC-D9  | exonic          | <i>PRKD1</i>         | nonsynonymous SNV      | NM_002742:c.G286A;p.G96R            |                            | chr14 | 30194859  | 30194859  | C   | T |
| ESCC-D9  | exonic          | <i>MYOG</i>          | nonsynonymous SNV      | NM_002479:c.G222C;p.K74N            |                            | chr1  | 203054868 | 203054868 | C   | G |
| ESCC-D9  | exonic          | <i>RIMS2</i>         | nonsynonymous SNV      | NM_014677:c.G10A;p.E4K              |                            | chr8  | 104831745 | 104831745 | G   | A |
| ESCC-D9  | exonic          | <i>LGI1</i>          | nonsynonymous SNV      | NM_005097:c.C1187T;p.T396M          |                            | chr10 | 95557073  | 95557073  | C   | T |
| ESCC-D9  | exonic          | <i>SHANK2</i>        | nonsynonymous SNV      | NM_133266:c.G2383C;p.E795Q          |                            | chr11 | 70332251  | 70332251  | C   | G |
| ESCC-D9  | exonic          | <i>FBXL18</i>        | nonsynonymous SNV      | NM_024963:c.C2037G;p.I679M          |                            | chr7  | 5521526   | 5521526   | G   | C |
| ESCC-D9  | exonic          | <i>PLXDC1</i>        | nonsynonymous SNV      | NM_020405:c.G772C;p.D258H           |                            | chr17 | 37262146  | 37262146  | C   | G |
| ESCC-D9  | exonic          | <i>TNIK</i>          | nonsynonymous SNV      | NM_001161561:c.G1403A;p.R468K       |                            | chr3  | 170856098 | 170856098 | C   | T |
| ESCC-D9  | exonic          | <i>NAV3</i>          | nonsynonymous SNV      | NM_014903:c.C5531T;p.P1844L         |                            | chr12 | 78574730  | 78574730  | C   | T |
| ESCC-D9  | exonic          | <i>OBSCN</i>         | nonsynonymous SNV      | NM_001098623:c.T16820C;p.V5607A     |                            | chr1  | 228525664 | 228525664 | T   | C |
| ESCC-D9  | exonic          | <i>LAMB4</i>         | nonsynonymous SNV      | NM_007356:c.G1668T;p.E556D          |                            | chr7  | 107732104 | 107732104 | C   | A |
| ESCC-D9  | exonic          | <i>NCOR2</i>         | nonsynonymous SNV      | NM_001077261:c.C2236A;p.Q746K       |                            | chr12 | 124857085 | 124857085 | G   | T |
| ESCC-D9  | exonic          | <i>PTPN22</i>        | nonsynonymous SNV      | NM_012411:c.G1904A;p.R635H          | 948638                     | chr1  | 114372636 | 114372636 | C   | T |
| ESCC-D9  | exonic          | <i>COL11A1</i>       | nonsynonymous SNV      | NM_080630:c.G4870C;p.E1624Q         |                            | chr1  | 103345295 | 103345295 | C   | G |
| ESCC-D9  | exonic          | <i>FGT-TNNI3K.T</i>  | stopgain SNV           | NM_015978:c.C2475A;p.C825X          |                            | chr1  | 75009633  | 75009633  | C   | A |
| ESCC-D9  | exonic          | <i>TARSL2</i>        | frameshift deletion    | NM_152334:c.1838delC;p.P613fs       |                            | chr15 | 102211902 | 102211902 | G   | - |
| ESCC-D9  | exonic          | <i>FAM169A</i>       | nonsynonymous SNV      | NM_015566:c.G1447C;p.V483L          |                            | chr5  | 74078773  | 74078773  | C   | G |
| ESCC-D9  | exonic          | <i>GPR37L1</i>       | nonsynonymous SNV      | NM_004767:c.C16T;p.P6S              |                            | chr1  | 202092107 | 202092107 | C   | T |
| ESCC-D9  | exonic          | <i>MYO18B</i>        | nonsynonymous SNV      | NM_032608:c.A4655T;p.E1552V         |                            | chr22 | 26291234  | 26291234  | A   | T |
| ESCC-D9  | exonic          | <i>PCSK4</i>         | nonsynonymous SNV      | NM_017573:c.C1024T;p.L342F          |                            | chr19 | 1486896   | 1486896   | G   | A |
| ESCC-D9  | exonic          | <i>KCNJ12;KCNJ18</i> | nonsynonymous SNV      | NM_001194958:c.G1208T;p.G403V       |                            | chr17 | 21319862  | 21319862  | G   | T |
| ESCC-D9  | exonic          | <i>FADS3</i>         | nonframeshift deletion | NM_021727:c.969_971del;p.323_324del |                            | chr11 | 61644350  | 61644352  | AAG | - |
| ESCC-D9  | exonic          | <i>MCF2</i>          | frameshift insertion   | NM_001171877:c.664_665insA;p.L222fs |                            | chrX  | 138701772 | 138701772 | -   | T |
| ESCC-D9  | exonic          | <i>ANKMY1</i>        | nonsynonymous SNV      | NM_017844:c.C1996T;p.R666C          |                            | chr2  | 241420465 | 241420465 | G   | A |
| ESCC-D9  | exonic          | <i>ANKMY1</i>        | nonsynonymous SNV      | NM_017844:c.T1994C;p.V665A          |                            | chr2  | 241420467 | 241420467 | A   | G |
| ESCC-D9  | exonic          | <i>SELO</i>          | unknown                | UNKNOWN                             |                            | chr22 | 50646980  | 50646980  | G   | A |
| ESCC-D9  | exonic          | <i>MED1</i>          | stopgain SNV           | NM_004774:c.C3523T;p.Q1175X         |                            | chr17 | 37564951  | 37564951  | G   | A |
| ESCC-D9  | exonic          | <i>ZNF750</i>        | nonsynonymous SNV      | NM_024702:c.T163G;p.L55V            |                            | chr17 | 80790168  | 80790168  | A   | C |
| ESCC-D10 | exonic          | <i>OR2L3</i>         | nonsynonymous SNV      | NM_001004687:c.T86A;p.L29H          |                            | chr1  | 248224069 | 248224069 | T   | A |
| ESCC-D10 | exonic          | <i>FAT1</i>          | frameshift deletion    | NM_005245:c.9120delA;p.K3040fs      |                            | chr4  | 187535454 | 187535454 | T   | - |

|          |          |                                                |                        |                                     |                            |       |           |           |     |   |
|----------|----------|------------------------------------------------|------------------------|-------------------------------------|----------------------------|-------|-----------|-----------|-----|---|
| ESCC-D10 | exonic   | <i>CEP192</i>                                  | nonsynonymous SNV      | NM_032142:c.A7183G;p.N2395D         |                            | chr18 | 13114144  | 13114144  | A   | G |
| ESCC-D10 | exonic   | <i>ZNF750</i>                                  | stopgain SNV           | NM_024702:c.C906A;p.Y302X           |                            | chr17 | 80789425  | 80789425  | G   | T |
| ESCC-D10 | exonic   | <i>PPP1R12B</i>                                | nonsynonymous SNV      | NM_001167857:c.G1111A;p.A371T       |                            | chr1  | 202400717 | 202400717 | G   | A |
| ESCC-D10 | exonic   | <i>AHNAK2</i>                                  | nonsynonymous SNV      | NM_138420:c.G2145T;p.Q715H          |                            | chr14 | 105419643 | 105419643 | C   | A |
| ESCC-D10 | exonic   | <i>ZNF761</i>                                  | stopgain SNV           | NM_001008401:c.C179G;p.S60X         |                            | chr19 | 53957940  | 53957940  | C   | G |
| ESCC-D10 | exonic   | <i>TPTE</i>                                    | nonsynonymous SNV      | NM_199260:c.T1150A;p.Y384N          |                            | chr21 | 10916382  | 10916382  | A   | T |
| ESCC-D10 | exonic   | <i>XPO5</i>                                    | nonsynonymous SNV      | NM_020750:c.C1099G;p.L367V          |                            | chr6  | 43528037  | 43528037  | G   | C |
| ESCC-D10 | exonic   | <i>PHF3</i>                                    | nonsynonymous SNV      | NM_015153:c.G2275A;p.E759K          |                            | chr6  | 64401712  | 64401712  | G   | A |
| ESCC-D10 | exonic   | <i>DHX32</i>                                   | nonsynonymous SNV      | NM_018180:c.G1004C;p.R335T          |                            | chr10 | 127542618 | 127542618 | C   | G |
| ESCC-D10 | exonic   | <i>PCDHB1</i>                                  | nonsynonymous SNV      | NM_013340:c.C1802T;p.S601F          |                            | chr5  | 140432857 | 140432857 | C   | T |
| ESCC-D10 | exonic   | <i>FAM190A</i>                                 | stopgain SNV           | NM_001145065:c.C22T;p.R8X           |                            | chr4  | 91229457  | 91229457  | C   | T |
| ESCC-D10 | splicing | <i>NOTCH1(NM_017617:exon34:c.6180-1G&gt;A)</i> |                        |                                     |                            | chr9  | 139393350 | 139393350 | C   | T |
| ESCC-D10 | exonic   | <i>IPO4</i>                                    | nonsynonymous SNV      | NM_024658:c.G1918A;p.D640N          |                            | chr14 | 24653056  | 24653056  | C   | T |
| ESCC-D10 | exonic   | <i>TIPARP</i>                                  | nonsynonymous SNV      | NM_001184717:c.C239G;p.T80R         |                            | chr3  | 156395725 | 156395725 | C   | G |
| ESCC-D10 | exonic   | <i>MYH4</i>                                    | nonsynonymous SNV      | NM_017533:c.G5575A;p.E1859K         |                            | chr17 | 10348013  | 10348013  | C   | T |
| ESCC-D10 | exonic   | <i>KNTC1</i>                                   | nonsynonymous SNV      | NM_014708:c.G5053C;p.E1685Q         |                            | chr12 | 123087742 | 123087742 | G   | C |
| ESCC-D10 | exonic   | <i>ABCC11</i>                                  | nonsynonymous SNV      | NM_033226:c.C734A;p.P245T           |                            | chr16 | 48173171  | 48173171  | G   | T |
| ESCC-D10 | exonic   | <i>ZNF211</i>                                  | nonsynonymous SNV      | NM_198855:c.G1247A;p.R416Q          | 1475033                    | chr19 | 58153101  | 58153101  | G   | A |
| ESCC-D10 | exonic   | <i>ATXN7</i>                                   | nonsynonymous SNV      | NM_001128149:c.C1168A;p.V390M       |                            | chr3  | 63976456  | 63976456  | G   | A |
| ESCC-D10 | exonic   | <i>CYP7B1</i>                                  | nonsynonymous SNV      | NM_004820:c.C1474G;p.Q492E          |                            | chr8  | 65509246  | 65509246  | G   | C |
| ESCC-D10 | exonic   | <i>NPHS2</i>                                   | nonsynonymous SNV      | NM_014625:c.C299T;p.A100V           |                            | chr1  | 179533904 | 179533904 | G   | A |
| ESCC-D10 | exonic   | <i>FZD6</i>                                    | nonsynonymous SNV      | NM_001164615:c.A1631G;p.Y544C       |                            | chr8  | 104341972 | 104341972 | A   | G |
| ESCC-D10 | exonic   | <i>BAI1</i>                                    | nonsynonymous SNV      | NM_001702:c.G1870A;p.A624T          |                            | chr8  | 143562656 | 143562656 | G   | A |
| ESCC-D10 | exonic   | <i>GULP1</i>                                   | nonsynonymous SNV      | NM_001252668:c.G85T;p.A29S          |                            | chr2  | 189348214 | 189348214 | G   | T |
| ESCC-D10 | exonic   | <i>KYNU</i>                                    | nonframeshift deletion | NM_003937:c.945_947del;p.315_316del |                            | chr2  | 143787238 | 143787240 | GAT | - |
| ESCC-D10 | exonic   | <i>PRR5L</i>                                   | nonsynonymous SNV      | NM_001160169:c.G187A;p.V63I         |                            | chr11 | 36424870  | 36424870  | G   | A |
| ESCC-D10 | exonic   | <i>FAM47A</i>                                  | nonsynonymous SNV      | NM_203408:c.C1552T;p.R518C          |                            | chrX  | 34148844  | 34148844  | G   | A |
| ESCC-D10 | exonic   | <i>HERPUD2</i>                                 | nonsynonymous SNV      | NM_022373:c.A155G;p.K52R            |                            | chr7  | 35712881  | 35712881  | T   | C |
| ESCC-D10 | exonic   | <i>KL</i>                                      | nonsynonymous SNV      | NM_004795:c.C1300A;p.L434I          |                            | chr13 | 33628384  | 33628384  | C   | A |
| ESCC-D10 | exonic   | <i>JFT172</i>                                  | nonsynonymous SNV      | NM_015662:c.C406T;p.R136C           |                            | chr2  | 27706523  | 27706523  | G   | A |
| ESCC-D10 | exonic   | <i>PTPRK</i>                                   | nonsynonymous SNV      | NM_001135648:c.G1986A;p.M662I       |                            | chr6  | 128388835 | 128388835 | C   | T |
| ESCC-D10 | exonic   | <i>NFE2L2</i>                                  | nonsynonymous SNV      | NM_001145412:c.G168A;p.E63Q         | 1560557;1571464;1571465;15 | chr2  | 178098810 | 178098810 | C   | G |
| ESCC-D10 | exonic   | <i>FMOD</i>                                    | nonsynonymous SNV      | NM_002023:c.C820T;p.R274W           |                            | chr1  | 203316579 | 203316579 | G   | A |
| ESCC-D10 | exonic   | <i>PPM1J</i>                                   | nonsynonymous SNV      | NM_005167:c.C509T;p.S170L           |                            | chr1  | 113255586 | 113255586 | G   | A |
| ESCC-D10 | exonic   | <i>NRG3</i>                                    | nonsynonymous SNV      | NM_001010848:c.A1281T;p.Q427H       |                            | chr10 | 84718828  | 84718828  | A   | T |
| ESCC-D10 | exonic   | <i>SI</i>                                      | stopgain SNV           | NM_001041:c.G4004A;p.W1335X         |                            | chr3  | 164730826 | 164730826 | C   | T |
| ESCC-D10 | exonic   | <i>ABCB5</i>                                   | nonsynonymous SNV      | NM_178559:c.C406T;p.H136Y           |                            | chr7  | 20721161  | 20721161  | C   | T |
| ESCC-D10 | exonic   | <i>DMD</i>                                     | nonsynonymous SNV      | NM_004014:c.A138T;p.L46F            |                            | chrX  | 31525463  | 31525463  | T   | A |
| ESCC-D10 | exonic   | <i>RANBP17</i>                                 | nonsynonymous SNV      | NM_022897:c.A745T;p.T249S           |                            | chr5  | 170338123 | 170338123 | A   | T |
| ESCC-D10 | exonic   | <i>MLL2</i>                                    | nonsynonymous SNV      | NM_003482:c.G15224A;p.G5075E        |                            | chr12 | 49420525  | 49420525  | C   | T |
| ESCC-D10 | exonic   | <i>SIGLEC10</i>                                | nonsynonymous SNV      | NM_001171157:c.C578T;p.T193M        |                            | chr19 | 51920048  | 51920048  | G   | A |
| ESCC-D10 | exonic   | <i>ZNF337</i>                                  | nonsynonymous SNV      | NM_015655:c.G1480A;p.G494R          |                            | chr20 | 25656444  | 25656444  | C   | T |
| ESCC-D10 | exonic   | <i>LPPR4</i>                                   | stopgain SNV           | NM_001166252:c.A1387T;p.R463X       |                            | chr1  | 99771835  | 99771835  | A   | T |
| ESCC-D10 | exonic   | <i>EP300</i>                                   | stopgain SNV           | NM_001429:c.C3549A;p.C1183X         |                            | chr22 | 41554463  | 41554463  | C   | A |
| ESCC-D10 | exonic   | <i>MAGEC3</i>                                  | nonsynonymous SNV      | NM_177456:c.T679G;p.F227V           |                            | chrX  | 140985117 | 140985117 | T   | G |
| ESCC-D10 | exonic   | <i>DNAH5</i>                                   | frameshift deletion    | NM_001369:c.13458delT;p.F4486fs     |                            | chr5  | 13701426  | 13701426  | A   | - |
| ESCC-D10 | exonic   | <i>OCA2</i>                                    | nonsynonymous SNV      | NM_000275:c.C629T;p.S210L           |                            | chr15 | 28267664  | 28267664  | G   | A |
| ESCC-D10 | exonic   | <i>NMBR</i>                                    | nonsynonymous SNV      | NM_002511:c.G289A;p.V97I            |                            | chr6  | 142409507 | 142409507 | C   | T |
| ESCC-D10 | exonic   | <i>BCA9</i>                                    | nonsynonymous SNV      | NM_080283:c.G4447A;p.E1483K         | 1542864                    | chr17 | 66980249  | 66980249  | C   | T |
| ESCC-D10 | exonic   | <i>ZBTB22</i>                                  | nonsynonymous SNV      | NM_001145338:c.C581T;p.S194F        |                            | chr6  | 33284113  | 33284113  | G   | A |
| ESCC-D10 | exonic   | <i>SZT2</i>                                    | nonsynonymous SNV      | NM_015284:c.G6385T;p.D2129Y         |                            | chr1  | 43904417  | 43904417  | G   | T |
| ESCC-D10 | exonic   | <i>PLAG1</i>                                   | nonsynonymous SNV      | NM_001114635:c.C773T;p.S258L        |                            | chr8  | 57079286  | 57079286  | G   | A |
| ESCC-D10 | exonic   | <i>LRR1Q3</i>                                  | frameshift insertion   | NM_001105659:c.733_734insA;p.Q245fs |                            | chr1  | 74575212  | 74575212  | -   | T |
| ESCC-D10 | exonic   | <i>TTC28</i>                                   | nonsynonymous SNV      | NM_001145418:c.G7309A;p.E2437K      |                            | chr22 | 28378346  | 28378346  | C   | T |



|          |                 |                  |                        |                                   |                         |       |           |           |     |   |
|----------|-----------------|------------------|------------------------|-----------------------------------|-------------------------|-------|-----------|-----------|-----|---|
| ESCC-D10 | exonic          | <i>BAI3</i>      | nonsynonymous SNV      | NM_001704:c.T4333A:p.F1445I       |                         | chr6  | 70092780  | 70092780  | T   | A |
| ESCC-D10 | exonic          | <i>HSP4</i>      | nonsynonymous SNV      | NM_001040667:c.C1424T:p.T475I     |                         | chr16 | 67203633  | 67203633  | C   | T |
| ESCC-D10 | exonic          | <i>NNMT</i>      | nonsynonymous SNV      | NM_006169:c.C52T:p.R18W           |                         | chr11 | 114167330 | 114167330 | C   | T |
| ESCC-D10 | exonic          | <i>SEC14L3</i>   | nonsynonymous SNV      | NM_174975:c.C388T:p.R130C         |                         | chr22 | 30864530  | 30864530  | G   | A |
| ESCC-D10 | exonic          | <i>IMP2</i>      | nonsynonymous SNV      | NM_016247:c.G3399T:p.R1133S       |                         | chr3  | 100949824 | 100949824 | C   | A |
| ESCC-D10 | exonic          | <i>ADAM18</i>    | nonsynonymous SNV      | NM_014237:c.A1163C:p.Q388P        |                         | chr8  | 39505979  | 39505979  | A   | C |
| ESCC-D10 | exonic          | <i>VCAN</i>      | nonsynonymous SNV      | NM_001164097:c.C2924G:p.A975G     |                         | chr5  | 82834707  | 82834707  | C   | G |
| ESCC-D11 | exonic          | <i>NBEA</i>      | nonsynonymous SNV      | NM_015678:c.C4217T:p.A1406V       |                         | chr13 | 35738630  | 35738630  | C   | T |
| ESCC-D11 | exonic          | <i>ADAMTS17</i>  | nonsynonymous SNV      | NM_139057:c.A2228G:p.Y743C        |                         | chr15 | 100594169 | 100594169 | T   | C |
| ESCC-D11 | exonic          | <i>LILRB1</i>    | nonsynonymous SNV      | NM_001081637:c.G124T:p.G42W       |                         | chr19 | 55143004  | 55143004  | G   | T |
| ESCC-D11 | exonic          | <i>KIAA1429</i>  | nonsynonymous SNV      | NM_015496:c.G1293T:p.L431F        |                         | chr8  | 95539179  | 95539179  | C   | A |
| ESCC-D11 | exonic          | <i>HLF</i>       | nonsynonymous SNV      | NM_002126:c.C332T:p.P111L         |                         | chr17 | 53345328  | 53345328  | C   | T |
| ESCC-D11 | exonic          | <i>SLCIA2</i>    | nonsynonymous SNV      | NM_004171:c.G118A:p.R373H         |                         | chr11 | 35308472  | 35308472  | C   | T |
| ESCC-D11 | exonic          | <i>KIAA1429</i>  | nonsynonymous SNV      | NM_015496:c.G1294T:p.V432L        |                         | chr8  | 95539178  | 95539178  | C   | A |
| ESCC-D11 | exonic          | <i>EIF2C1</i>    | nonsynonymous SNV      | NM_012199:c.T1088C:p.I363T        |                         | chr1  | 36367142  | 36367142  | T   | C |
| ESCC-D11 | exonic          | <i>FZD3</i>      | nonsynonymous SNV      | NM_145866:c.G548C:p.R183P         |                         | chr8  | 28384825  | 28384825  | G   | C |
| ESCC-D11 | exonic          | <i>KCNT2</i>     | nonsynonymous SNV      | NM_198503:c.C187T:p.R63C          |                         | chr1  | 196459056 | 196459056 | G   | A |
| ESCC-D11 | exonic          | <i>RAB40A</i>    | nonsynonymous SNV      | NM_080879:c.T739C:p.S247P         |                         | chrX  | 102754946 | 102754946 | A   | G |
| ESCC-D11 | exonic          | <i>HIST2H2AC</i> | nonframeshift deletion | NM_003517:c.269_271del:p.90_91del |                         | chr1  | 149858793 | 149858795 | ACG | - |
| ESCC-D11 | exonic:splicing | <i>REER;REER</i> | nonsynonymous SNV      | NM_001042682:c.G2824A:p.G942S     |                         | chr1  | 8416160   | 8416160   | C   | T |
| ESCC-D11 | exonic          | <i>SLC05A1</i>   | nonsynonymous SNV      | NM_001146008:c.C1057A:p.L353I     |                         | chr8  | 70667860  | 70667860  | G   | T |
| ESCC-D11 | exonic          | <i>KDM6A</i>     | nonsynonymous SNV      | NM_021140:c.A3467C:p.N1156T       | 724870;749715;946354    | chrX  | 44945143  | 44945143  | A   | C |
| ESCC-D11 | exonic          | <i>ZNF518A</i>   | unknown                | UNKNOWN                           |                         | chr10 | 97918856  | 97918856  | A   | - |
| ESCC-D11 | exonic          | <i>HARS</i>      | nonsynonymous SNV      | NM_002109:c.C1084T:p.R362C        |                         | chr5  | 140056349 | 140056349 | G   | A |
| ESCC-D11 | exonic          | <i>ZBBX</i>      | nonsynonymous SNV      | NM_001199202:c.A1938T:p.E646D     |                         | chr3  | 167000138 | 167000138 | T   | A |
| ESCC-D11 | exonic          | <i>Cl6orf70</i>  | nonsynonymous SNV      | NM_025187:c.G875A:p.G292E         |                         | chr16 | 67174493  | 67174493  | G   | A |
| ESCC-D11 | exonic          | <i>WEE1</i>      | nonsynonymous SNV      | NM_001143976:c.G1274A:p.R425H     |                         | chr11 | 9610124   | 9610124   | G   | A |
| ESCC-D11 | exonic          | <i>ORS1F2</i>    | nonsynonymous SNV      | NM_001004753:c.G654C:p.L218F      |                         | chr11 | 4843269   | 4843269   | G   | C |
| ESCC-D11 | exonic          | <i>PLXNA4</i>    | nonsynonymous SNV      | NM_001105543:c.G733A:p.V245I      |                         | chr7  | 132192720 | 132192720 | C   | T |
| ESCC-D11 | exonic          | <i>PYROXD2</i>   | nonsynonymous SNV      | NM_032709:c.G822C:p.E274D         |                         | chr10 | 100152804 | 100152804 | C   | G |
| ESCC-D11 | exonic          | <i>DNAH5</i>     | nonsynonymous SNV      | NM_001369:c.G10195A:p.V3399I      |                         | chr5  | 13762917  | 13762917  | C   | T |
| ESCC-D11 | exonic          | <i>SIN3A</i>     | nonsynonymous SNV      | NM_001145357:c.G1298A:p.G433E     |                         | chr15 | 75702196  | 75702196  | C   | T |
| ESCC-D11 | exonic          | <i>PHF17</i>     | nonsynonymous SNV      | NM_199320:c.A2440T:p.S814C        |                         | chr4  | 129793328 | 129793328 | A   | T |
| ESCC-D11 | exonic          | <i>LAMA4</i>     | nonsynonymous SNV      | NM_001105206:c.C5344T:p.R1782C    |                         | chr6  | 112430768 | 112430768 | G   | A |
| ESCC-D11 | exonic          | <i>PRAMEF2</i>   | nonsynonymous SNV      | NM_023014:c.T83C:p.M28T           |                         | chr1  | 12918947  | 12918947  | T   | C |
| ESCC-D11 | exonic          | <i>ZNF626</i>    | nonsynonymous SNV      | NM_001076675:c.G1502A:p.R501K     |                         | chr19 | 20807181  | 20807181  | C   | T |
| ESCC-D11 | exonic          | <i>SLC26A7</i>   | nonsynonymous SNV      | NM_052832:c.C438G:p.H146Q         |                         | chr8  | 92307892  | 92307892  | C   | G |
| ESCC-D11 | exonic          | <i>CPLX3</i>     | nonsynonymous SNV      | NM_001030005:c.C301A:p.L101M      |                         | chr15 | 75122519  | 75122519  | C   | A |
| ESCC-D11 | exonic          | <i>TRAPPC8</i>   | nonsynonymous SNV      | NM_014939:c.T3697C:p.C1233R       |                         | chr18 | 29429567  | 29429567  | A   | G |
| ESCC-D12 | exonic          | <i>CEP78</i>     | nonsynonymous SNV      | NM_001098802:c.C1113A:p.H371Q     |                         | chr9  | 80866864  | 80866864  | C   | A |
| ESCC-D12 | exonic          | <i>OMA1</i>      | nonsynonymous SNV      | NM_145243:c.T623C:p.V208A         |                         | chr1  | 59002291  | 59002291  | A   | G |
| ESCC-D12 | exonic          | <i>PTCH1</i>     | nonsynonymous SNV      | NM_000264:c.C3155T:p.T1052M       | 1184183;1512985;1513021 | chr9  | 98220308  | 98220308  | G   | A |
| ESCC-D12 | exonic          | <i>TET1</i>      | nonsynonymous SNV      | NM_030625:c.A4226G:p.N1409S       |                         | chr10 | 70406712  | 70406712  | A   | G |
| ESCC-D12 | exonic          | <i>MICA</i>      | nonsynonymous SNV      | NM_000247:c.G862A:p.G288R         |                         | chr6  | 31379972  | 31379972  | G   | A |
| ESCC-D12 | exonic          | <i>CD33</i>      | nonsynonymous SNV      | NM_001082618:c.A211G:p.I71V       |                         | chr19 | 51729232  | 51729232  | A   | G |
| ESCC-D12 | exonic          | <i>MAP3K9</i>    | nonsynonymous SNV      | NM_033141:c.A1456G:p.I486V        |                         | chr14 | 71209179  | 71209179  | T   | C |
| ESCC-D13 | exonic          | <i>GBP7</i>      | stopgain SNV           | NM_207398:c.C1772G:p.S591X        |                         | chr1  | 89597977  | 89597977  | G   | C |
| ESCC-D13 | exonic          | <i>UNC80</i>     | nonsynonymous SNV      | NM_032504:c.C1817T:p.P60L         |                         | chr2  | 210683840 | 210683840 | C   | T |
| ESCC-D13 | exonic          | <i>SLC9A3R1</i>  | nonsynonymous SNV      | NM_004252:c.G1050C:p.K350N        |                         | chr17 | 72764768  | 72764768  | G   | C |
| ESCC-D13 | exonic          | <i>ZFHX3</i>     | nonsynonymous SNV      | NM_001164766:c.C4085G:p.S1362C    |                         | chr16 | 72829754  | 72829754  | G   | C |
| ESCC-D13 | exonic          | <i>KCNG1</i>     | nonsynonymous SNV      | NM_002237:c.C294G:p.F98L          |                         | chr20 | 49626582  | 49626582  | G   | C |
| ESCC-D13 | exonic          | <i>FMN1</i>      | nonsynonymous SNV      | NM_001103184:c.G875C:p.G292A      |                         | chr15 | 33359211  | 33359211  | C   | G |
| ESCC-D13 | exonic          | <i>PASD1</i>     | nonsynonymous SNV      | NM_173493:c.G255C:p.E85D          |                         | chrX  | 150789449 | 150789449 | G   | C |
| ESCC-D13 | exonic          | <i>PCDH10</i>    | nonsynonymous SNV      | NM_020815:c.C395G:p.S132C         |                         | chr4  | 134071690 | 134071690 | C   | G |

|          |          |                                            |                     |                                            |       |           |           |    |   |
|----------|----------|--------------------------------------------|---------------------|--------------------------------------------|-------|-----------|-----------|----|---|
| ESCC-D13 | exonic   | <i>CHST11</i>                              | nonsynonymous SNV   | NM_001173982:c.C1016T;p.S339L              | chr12 | 105151553 | 105151553 | C  | T |
| ESCC-D13 | exonic   | <i>NKX2-3</i>                              | nonsynonymous SNV   | NM_145285:c.G61A;p.E21K                    | chr10 | 101292949 | 101292949 | G  | A |
| ESCC-D13 | exonic   | <i>TESK1</i>                               | nonsynonymous SNV   | NM_006285:c.C1388T;p.S463L                 | chr9  | 35609246  | 35609246  | C  | T |
| ESCC-D13 | exonic   | <i>ERP44</i>                               | nonsynonymous SNV   | NM_015051:c.G354A;p.M118I                  | chr9  | 102784441 | 102784441 | C  | T |
| ESCC-D13 | exonic   | <i>NEFM</i>                                | nonsynonymous SNV   | NM_001105541:c.G19C;p.E7Q                  | chr8  | 24773184  | 24773184  | G  | C |
| ESCC-D13 | exonic   | <i>ERCC2</i>                               | stopgain SNV        | NM_001130867:c.C149G;p.S50X                | chr19 | 45872213  | 45872213  | G  | C |
| ESCC-D13 | splicing | <i>TNN(NM_022093:exon5:c.1049-1G&gt;A)</i> |                     |                                            | chr1  | 175052885 | 175052885 | G  | A |
| ESCC-D13 | exonic   | <i>UBN1</i>                                | nonsynonymous SNV   | NM_016936:c.G1552A;p.E518K                 | chr16 | 4920966   | 4920966   | G  | A |
| ESCC-D13 | exonic   | <i>PRSS46</i>                              | nonsynonymous SNV   | NM_001205271:c.C416T;p.S139L               | chr3  | 46775230  | 46775230  | G  | A |
| ESCC-D13 | exonic   | <i>PLOD1</i>                               | nonsynonymous SNV   | NM_000302:c.A1351G;p.L451V                 | chr1  | 12024723  | 12024723  | A  | G |
| ESCC-D13 | exonic   | <i>GCFC2</i>                               | nonsynonymous SNV   | NM_001201335:c.G301A;p.D101N               | chr2  | 75933742  | 75933742  | C  | T |
| ESCC-D13 | exonic   | <i>C5orf44</i>                             | nonsynonymous SNV   | NM_001093755:c.G439A;p.A147T               | chr5  | 64946647  | 64946647  | G  | A |
| ESCC-D13 | exonic   | <i>SLC4A10</i>                             | nonsynonymous SNV   | NM_022058:c.G1564A;p.G522R                 | chr2  | 162761322 | 162761322 | G  | A |
| ESCC-D13 | exonic   | <i>PUS3</i>                                | nonsynonymous SNV   | NM_031307:c.C464T;p.A155V                  | chr11 | 125765599 | 125765599 | G  | A |
| ESCC-D13 | exonic   | <i>FBXL2</i>                               | nonsynonymous SNV   | NM_001171713:c.G670A;p.D224N               | chr3  | 33419619  | 33419619  | G  | A |
| ESCC-D13 | exonic   | <i>C1orf65</i>                             | nonsynonymous SNV   | NM_152610:c.C1516G;p.L506V                 | chr1  | 223568333 | 223568333 | C  | G |
| ESCC-D13 | exonic   | <i>ADAMTS12</i>                            | nonsynonymous SNV   | NM_030955:c.T3899G;p.L1300R                | chr5  | 33576232  | 33576232  | A  | C |
| ESCC-D13 | exonic   | <i>CDH13</i>                               | nonsynonymous SNV   | NM_001220491:c.T550A;p.C184S               | chr16 | 83214541  | 83214541  | T  | A |
| ESCC-D13 | exonic   | <i>SLCSA4</i>                              | nonsynonymous SNV   | NM_014227:c.G1520C;p.G507A                 | chr22 | 32620399  | 32620399  | C  | G |
| ESCC-D13 | exonic   | <i>LAMA3</i>                               | nonsynonymous SNV   | NM_001127717:c.A485G;p.N162S               | chr18 | 21327944  | 21327944  | A  | G |
| ESCC-D13 | exonic   | <i>MEF2C</i>                               | nonsynonymous SNV   | NM_001193348:c.G1139T;p.R380L              | chr5  | 88018536  | 88018536  | C  | A |
| ESCC-D13 | exonic   | <i>C17orf104</i>                           | nonsynonymous SNV   | NM_001145080:c.G165C;p.L55F                | chr17 | 42734590  | 42734590  | G  | C |
| ESCC-D13 | exonic   | <i>KBTD12</i>                              | nonsynonymous SNV   | NM_207335:c.G640C;p.V214L                  | chr3  | 127642544 | 127642544 | G  | C |
| ESCC-D13 | exonic   | <i>TST</i>                                 | nonsynonymous SNV   | NM_003312:c.G517C;p.E173Q                  | chr22 | 37414257  | 37414257  | C  | G |
| ESCC-D13 | exonic   | <i>FAN1</i>                                | nonsynonymous SNV   | NM_014967:c.G1796C;p.R599T                 | chr15 | 31206279  | 31206279  | G  | C |
| ESCC-D13 | exonic   | <i>BRF1</i>                                | stopgain SNV        | NM_001242788:c.G523T;p.E175X               | chr14 | 105707692 | 105707692 | C  | A |
| ESCC-D13 | exonic   | <i>PITPNM3</i>                             | nonsynonymous SNV   | NM_001165966:c.C1798G;p.H600D              | chr17 | 6368076   | 6368076   | G  | C |
| ESCC-D13 | exonic   | <i>SYNE1</i>                               | nonsynonymous SNV   | NM_033071:c.C6112G;p.H2038D                | chr6  | 152734626 | 152734626 | G  | C |
| ESCC-D13 | exonic   | <i>HECTD1</i>                              | nonsynonymous SNV   | NM_015382:c.G7351C;p.D2451H                | chr14 | 31574637  | 31574637  | C  | G |
| ESCC-D13 | exonic   | <i>UTP15</i>                               | nonsynonymous SNV   | NM_032175:c.C530T;p.P177L                  | chr5  | 72865483  | 72865483  | C  | T |
| ESCC-D13 | exonic   | <i>HERC6</i>                               | nonsynonymous SNV   | NM_001165136:c.A518T;p.Q173L               | chr4  | 89311885  | 89311885  | A  | T |
| ESCC-D13 | exonic   | <i>GOLM1</i>                               | nonsynonymous SNV   | NM_016548:c.G1190A;p.R397Q                 | chr9  | 88642748  | 88642748  | C  | T |
| ESCC-D13 | exonic   | <i>DISP2</i>                               | nonsynonymous SNV   | NM_033510:c.G3985C;p.E1329Q                | chr15 | 40662298  | 40662298  | G  | C |
| ESCC-D13 | exonic   | <i>ATP10D</i>                              | nonsynonymous SNV   | NM_020453:c.G1042A;p.E348K                 | chr4  | 47538480  | 47538480  | G  | A |
| ESCC-D13 | exonic   | <i>FAT3</i>                                | nonsynonymous SNV   | NM_001008781:c.T893A;p.L298N               | chr11 | 92086171  | 92086171  | T  | A |
| ESCC-D13 | exonic   | <i>LTBP3</i>                               | nonsynonymous SNV   | NM_001130144:c.A3050G;p.Y1017C             | chr11 | 65308013  | 65308013  | T  | C |
| ESCC-D13 | exonic   | <i>SUV39H2</i>                             | nonsynonymous SNV   | NM_024670:c.G916C;p.E306Q                  | chr10 | 14943231  | 14943231  | G  | C |
| ESCC-D13 | exonic   | <i>DMXL2</i>                               | nonsynonymous SNV   | NM_001174116:c.C2011T;p.H671Y              | chr15 | 51828666  | 51828666  | G  | A |
| ESCC-D13 | exonic   | <i>ZFAT</i>                                | nonsynonymous SNV   | NM_001174157:c.C1356A;p.D452E              | chr8  | 135614420 | 135614420 | G  | T |
| ESCC-D13 | exonic   | <i>GC</i>                                  | nonsynonymous SNV   | NM_000583:c.G1135A;p.E379K                 | chr4  | 72620724  | 72620724  | C  | T |
| ESCC-D13 | exonic   | <i>APCDD1</i>                              | nonsynonymous SNV   | NM_153000:c.C1294T;p.R432W                 | chr18 | 10487784  | 10487784  | C  | T |
| ESCC-D13 | exonic   | <i>AP2B1</i>                               | nonsynonymous SNV   | NM_001030006:c.G1366A;p.A456T              | chr17 | 33966708  | 33966708  | G  | A |
| ESCC-D13 | exonic   | <i>AHR</i>                                 | nonsynonymous SNV   | NM_001621:c.G1474C;p.E492Q                 | chr7  | 17378923  | 17378923  | G  | C |
| ESCC-D13 | exonic   | <i>LTBP3</i>                               | frameshift deletion | NM_001130144:c.3053_3054del;p.1018_1018del | chr11 | 65308009  | 65308010  | CT | - |
| ESCC-D13 | exonic   | <i>SERPINB4</i>                            | nonsynonymous SNV   | NM_002974:c.T1080A;p.N360K                 | chr18 | 61305046  | 61305046  | A  | T |
| ESCC-D13 | exonic   | <i>MERTK</i>                               | nonsynonymous SNV   | NM_006343:c.A2459G;p.K820R                 | chr2  | 112779944 | 112779944 | A  | G |
| ESCC-D13 | exonic   | <i>SEMA3A</i>                              | nonsynonymous SNV   | NM_006080:c.A1697G;p.H566R                 | chr7  | 83606468  | 83606468  | T  | C |
| ESCC-D13 | exonic   | <i>FOXC1</i>                               | nonsynonymous SNV   | NM_001453:c.C771G;p.I257M                  | chr6  | 1611451   | 1611451   | C  | G |
| ESCC-D13 | exonic   | <i>SERPINB4</i>                            | nonsynonymous SNV   | NM_002974:c.A1079C;p.N360T                 | chr18 | 61305047  | 61305047  | T  | G |
| ESCC-D13 | exonic   | <i>SYNE2</i>                               | nonsynonymous SNV   | NM_015180:c.C2275G;p.Q759E                 | chr14 | 64453297  | 64453297  | C  | G |
| ESCC-D13 | exonic   | <i>DNAI1</i>                               | nonsynonymous SNV   | NM_012144:c.T1172C;p.I391T                 | chr9  | 34506733  | 34506733  | T  | C |
| ESCC-D13 | exonic   | <i>ZFH3</i>                                | nonsynonymous SNV   | NM_001164766:c.C7165G;p.L2389V             | chr16 | 72822268  | 72822268  | G  | C |
| ESCC-D13 | exonic   | <i>CDK11B</i>                              | nonsynonymous SNV   | NM_033487:c.C1160G;p.T387S                 | chr1  | 1571833   | 1571833   | G  | C |
| ESCC-D13 | exonic   | <i>BAZ1B</i>                               | nonsynonymous SNV   | NM_032408:c.C4015T;p.R1339W                | chr7  | 72857134  | 72857134  | G  | A |

|          |          |                  |                      |                                       |                            |       |           |           |   |   |
|----------|----------|------------------|----------------------|---------------------------------------|----------------------------|-------|-----------|-----------|---|---|
| ESCC-D13 | exonic   | <i>CWF19L2</i>   | nonsynonymous SNV    | NM_152434:c.G2243C:p.G748A            |                            | chr11 | 107207399 | 107207399 | C | G |
| ESCC-D13 | exonic   | <i>PTK7</i>      | frameshift deletion  | NM_002821:c.18delA:p.G6fs             |                            | chr6  | 43044244  | 43044244  | A | - |
| ESCC-D13 | exonic   | <i>MED13</i>     | nonsynonymous SNV    | NM_005121:c.G16T:p.V6L                |                            | chr17 | 60142551  | 60142551  | C | A |
| ESCC-D13 | exonic   | <i>NAV3</i>      | nonsynonymous SNV    | NM_014903:c.G3904A:p.G1302S           |                            | chr12 | 78515874  | 78515874  | G | A |
| ESCC-D14 | exonic   | <i>WIPF1</i>     | nonsynonymous SNV    | NM_001077269:c.C1031T:p.S344F         |                            | chr2  | 175436502 | 175436502 | G | A |
| ESCC-D14 | exonic   | <i>Cl2orf12</i>  | nonsynonymous SNV    | NM_152638:c.G990C:p.E330D             |                            | chr12 | 91347530  | 91347530  | C | G |
| ESCC-D14 | exonic   | <i>KRTAP15-1</i> | nonsynonymous SNV    | NM_181623:c.C172A:p.P58T              |                            | chr21 | 31812817  | 31812817  | C | A |
| ESCC-D14 | exonic   | <i>OR4D6</i>     | nonsynonymous SNV    | NM_001004708:c.G373A:p.A125T          |                            | chr11 | 59224806  | 59224806  | G | A |
| ESCC-D14 | exonic   | <i>TTN</i>       | nonsynonymous SNV    | NM_003319:c.G21691T:p.D7231Y          |                            | chr2  | 179479355 | 179479355 | C | A |
| ESCC-D14 | exonic   | <i>PTEEN</i>     | nonsynonymous SNV    | NM_000314:c.G256A:p.A86T              | 687563;713885;724838;75356 | chr10 | 89692772  | 89692772  | G | A |
| ESCC-D14 | exonic   | <i>TTN</i>       | nonsynonymous SNV    | NM_003319:c.T21674C:p.I7225T          |                            | chr2  | 179479372 | 179479372 | A | G |
| ESCC-D14 | exonic   | <i>PRDM9</i>     | nonsynonymous SNV    | NM_020227:c.G5T:p.S2I                 |                            | chr5  | 23509147  | 23509147  | G | T |
| ESCC-D14 | exonic   | <i>KIF5B</i>     | nonsynonymous SNV    | NM_004521:c.C511T:p.R171C             |                            | chr10 | 32326523  | 32326523  | G | A |
| ESCC-D14 | exonic   | <i>OR4F15</i>    | nonsynonymous SNV    | NM_001001674:c.G12C:p.M4I             |                            | chr15 | 102358401 | 102358401 | G | C |
| ESCC-D14 | exonic   | <i>POLD2</i>     | nonsynonymous SNV    | NM_001127218:c.A1060T:p.T354S         |                            | chr7  | 44155452  | 44155452  | G | A |
| ESCC-D14 | exonic   | <i>TAF1L</i>     | nonsynonymous SNV    | NM_153809:c.G1113A:p.M371I            |                            | chr9  | 32634465  | 32634465  | C | T |
| ESCC-D14 | exonic   | <i>CBBL</i>      | nonsynonymous SNV    | NM_170662:c.C1760T:p.P587L            |                            | chr3  | 105421137 | 105421137 | G | A |
| ESCC-D14 | exonic   | <i>C9orf43</i>   | nonsynonymous SNV    | NM_152786:c.G335A:p.R112K             |                            | chr9  | 116181435 | 116181435 | G | A |
| ESCC-D14 | exonic   | <i>PLCH2</i>     | nonsynonymous SNV    | NM_014638:c.C3706T:p.P1236S           |                            | chr1  | 2436107   | 2436107   | C | T |
| ESCC-D14 | exonic   | <i>NCKIPSD</i>   | nonsynonymous SNV    | NM_016453:c.G1801T:p.V601L            |                            | chr3  | 48716161  | 48716161  | C | A |
| ESCC-D14 | exonic   | <i>Cl7orf57</i>  | frameshift insertion | NM_001195192:c.1060_1061insA:p.E354fs |                            | chr17 | 45452308  | 45452308  | - | A |
| ESCC-D14 | exonic   | <i>TATDN1</i>    | nonsynonymous SNV    | NM_001146160:c.A140T:p.K47M           |                            | chr8  | 125528193 | 125528193 | T | A |
| ESCC-D14 | exonic   | <i>TP53</i>      | nonsynonymous SNV    | NM_001126115:c.G73T:p.V25F            | 713878;724834;749721;75358 | chr17 | 7578461   | 7578461   | C | A |
| ESCC-D14 | exonic   | <i>IKBIP</i>     | nonsynonymous SNV    | NM_153687:c.C457G:p.Q153E             |                            | chr12 | 99020385  | 99020385  | G | C |
| ESCC-D14 | exonic   | <i>EPHA7</i>     | nonsynonymous SNV    | NM_004440:c.G744C:p.M248I             |                            | chr6  | 94120307  | 94120307  | C | G |
| ESCC-D14 | exonic   | <i>FMN2</i>      | nonsynonymous SNV    | NM_020066:c.G2881A:p.G961R            |                            | chr1  | 240370993 | 240370993 | G | A |
| ESCC-D14 | exonic   | <i>MLL4</i>      | nonsynonymous SNV    | NM_001207008:c.G2518A:p.D840N         |                            | chr6  | 168317790 | 168317790 | G | A |
| ESCC-D14 | exonic   | <i>MAB21L2</i>   | stopgain SNV         | NM_006439:c.C750A:p.C250X             |                            | chr4  | 151504931 | 151504931 | C | A |
| ESCC-D14 | exonic   | <i>TTN</i>       | nonsynonymous SNV    | NM_003319:c.C67523A:p.A22508D         |                            | chr2  | 179411437 | 179411437 | G | T |
| ESCC-D14 | exonic   | <i>ZNF134</i>    | nonsynonymous SNV    | NM_003435:c.G1189C:p.E397Q            |                            | chr19 | 58132676  | 58132676  | G | C |
| ESCC-D14 | splicing | <i>PABPC3</i>    |                      |                                       |                            | chr13 | 25670277  | 25670277  | C | T |
| ESCC-D14 | exonic   | <i>ITGA7</i>     | nonsynonymous SNV    | NM_001144996:c.C3262T:p.P1088S        |                            | chr12 | 56079006  | 56079006  | G | A |
| ESCC-D14 | exonic   | <i>LTN1</i>      | nonsynonymous SNV    | NM_015565:c.G631A:p.A211T             |                            | chr21 | 30357096  | 30357096  | C | T |
| ESCC-D14 | exonic   | <i>ERBB4</i>     | nonsynonymous SNV    | NM_001042599:c.C3206A:p.T1069N        |                            | chr2  | 212251805 | 212251805 | G | T |
| ESCC-D14 | exonic   | <i>PCDHGB1</i>   | nonsynonymous SNV    | NM_018922:c.G1549A:p.D517N            |                            | chr5  | 140731376 | 140731376 | G | A |
| ESCC-D14 | exonic   | <i>RBL2</i>      | nonsynonymous SNV    | NM_005611:c.G1618A:p.V540I            |                            | chr16 | 53498195  | 53498195  | G | A |
| ESCC-D14 | exonic   | <i>KIAA0754</i>  | nonsynonymous SNV    | NM_015038:c.T383A:p.V128D             |                            | chr1  | 39876320  | 39876320  | T | A |
| ESCC-D14 | exonic   | <i>GDPD4</i>     | nonsynonymous SNV    | NM_182833:c.C896T:p.S299L             |                            | chr11 | 76956516  | 76956516  | G | A |
| ESCC-D14 | exonic   | <i>GCCL</i>      | nonsynonymous SNV    | NM_001197115:c.T414G:p.N138K          |                            | chr6  | 53385608  | 53385608  | A | C |
| ESCC-D14 | exonic   | <i>CUBN</i>      | nonsynonymous SNV    | NM_001081:c.C5522T:p.T1841M           |                            | chr10 | 16982057  | 16982057  | G | A |
| ESCC-D14 | exonic   | <i>KLHL24</i>    | nonsynonymous SNV    | NM_017644:c.G179A:p.R60H              |                            | chr3  | 183368323 | 183368323 | G | A |
| ESCC-D14 | exonic   | <i>ZC3H7B</i>    | nonsynonymous SNV    | NM_017590:c.G1325A:p.R442H            |                            | chr22 | 41739446  | 41739446  | G | A |
| ESCC-D14 | exonic   | <i>HIST1H4A</i>  | nonsynonymous SNV    | NM_003538:c.G205C:p.D69H              |                            | chr6  | 26022111  | 26022111  | G | C |
| ESCC-D14 | exonic   | <i>TRIO</i>      | nonsynonymous SNV    | NM_007118:c.G3221T:p.C1074F           |                            | chr5  | 14374342  | 14374342  | G | T |
| ESCC-D14 | exonic   | <i>NEU4</i>      | nonsynonymous SNV    | NM_001167599:c.G931T:p.V311L          |                            | chr2  | 242757811 | 242757811 | G | T |
| ESCC-D14 | exonic   | <i>ZNF835</i>    | stopgain SNV         | NM_001005850:c.C540A:p.Y180X          |                            | chr19 | 57176027  | 57176027  | G | T |
| ESCC-D14 | exonic   | <i>XIRP2</i>     | nonsynonymous SNV    | NM_001199144:c.C1432A:p.H478N         |                            | chr2  | 168100000 | 168100000 | C | A |
| ESCC-D14 | exonic   | <i>PCDHA4</i>    | nonsynonymous SNV    | NM_018907:c.C2075T:p.A692V            |                            | chr5  | 140188847 | 140188847 | C | T |
| ESCC-D14 | exonic   | <i>SCN7A</i>     | nonsynonymous SNV    | NM_002976:c.T575A:p.V192D             |                            | chr2  | 167327214 | 167327214 | A | T |
| ESCC-D14 | exonic   | <i>PLEC</i>      | nonsynonymous SNV    | NM_201378:c.G10319A:p.G3440D          |                            | chr8  | 144993628 | 144993628 | C | T |
| ESCC-D14 | exonic   | <i>MLX</i>       | nonsynonymous SNV    | NM_170607:c.G170T:p.C57F              |                            | chr17 | 40719312  | 40719312  | G | T |
| ESCC-D14 | exonic   | <i>LCT</i>       | nonsynonymous SNV    | NM_002299:c.G3853T:p.D1285Y           |                            | chr2  | 136566064 | 136566064 | C | A |
| ESCC-D14 | exonic   | <i>LRP2</i>      | nonsynonymous SNV    | NM_004525:c.G12062T:p.C4021F          |                            | chr2  | 170012873 | 170012873 | C | A |
| ESCC-D14 | exonic   | <i>RASL10B</i>   | nonsynonymous SNV    | NM_033315:c.G466A:p.V156M             |                            | chr17 | 34068178  | 34068178  | G | A |

|          |          |                                               |                        |                                       |         |       |           |           |     |   |
|----------|----------|-----------------------------------------------|------------------------|---------------------------------------|---------|-------|-----------|-----------|-----|---|
| ESCC-D14 | exonic   | <i>CTSO</i>                                   | nonsynonymous SNV      | NM_001334:c.C191G;p.T64S              |         | chr4  | 156864361 | 156864361 | G   | C |
| ESCC-D14 | exonic   | <i>SPANXN2</i>                                | nonsynonymous SNV      | NM_001009615:c.C421A;p.L141M          |         | chrX  | 142795257 | 142795257 | G   | T |
| ESCC-D14 | exonic   | <i>RUNDC3B</i>                                | nonsynonymous SNV      | NM_001134405:c.G305A;p.R102Q          |         | chr7  | 87329803  | 87329803  | G   | A |
| ESCC-D14 | splicing | <i>LRRK2(NM_198578:exon25:c.3348-1G&gt;C)</i> |                        |                                       |         | chr12 | 40692910  | 40692910  | G   | C |
| ESCC-D14 | exonic   | <i>A2M</i>                                    | nonsynonymous SNV      | NM_000014:c.C2340G;p.I780M            |         | chr12 | 9243926   | 9243926   | G   | C |
| ESCC-D14 | exonic   | <i>ANG</i>                                    | nonsynonymous SNV      | NM_001097577:c.C169T;p.R57W           |         | chr14 | 21161892  | 21161892  | C   | T |
| ESCC-D14 | exonic   | <i>ANKRD33</i>                                | nonsynonymous SNV      | NM_182608:c.G292T;p.A98S              |         | chr12 | 52282498  | 52282498  | G   | T |
| ESCC-D14 | exonic   | <i>ERMN</i>                                   | stopgain SNV           | NM_020711:c.C487T;p.R163X             |         | chr2  | 158178151 | 158178151 | G   | A |
| ESCC-D14 | exonic   | <i>OR4L1</i>                                  | nonsynonymous SNV      | NM_001004717:c.T248C;p.I83T           | 1560560 | chr14 | 20528451  | 20528451  | T   | C |
| ESCC-D14 | exonic   | <i>TDRD3</i>                                  | nonsynonymous SNV      | NM_001146070:c.A1219G;p.N407D         |         | chr13 | 61102578  | 61102578  | A   | G |
| ESCC-D14 | exonic   | <i>PLEKHD1</i>                                | nonsynonymous SNV      | NM_001161498:c.C1450T;p.R484W         |         | chr14 | 69995065  | 69995065  | C   | T |
| ESCC-D14 | exonic   | <i>RALGAPB</i>                                | nonframeshift deletion | NM_020336:c.2066_2068del;p.689_690del |         | chr20 | 37159825  | 37159827  | TTG | - |
| ESCC-D14 | exonic   | <i>HEG1</i>                                   | stopgain SNV           | NM_020733:c.C3911G;p.S1304X           |         | chr3  | 124692660 | 124692660 | G   | C |
| ESCC-D14 | exonic   | <i>ANGPTL1</i>                                | nonsynonymous SNV      | NM_004673:c.T733A;p.Y245N             |         | chr1  | 178834179 | 178834179 | A   | T |
| ESCC-D14 | exonic   | <i>VASH1</i>                                  | nonsynonymous SNV      | NM_014909:c.G746A;p.R249H             |         | chr14 | 77242450  | 77242450  | G   | A |
| ESCC-D14 | exonic   | <i>RHAG</i>                                   | nonsynonymous SNV      | NM_000324:c.G3A;p.M1I                 |         | chr6  | 49604523  | 49604523  | C   | T |
| ESCC-D14 | exonic   | <i>TDRD3</i>                                  | nonsynonymous SNV      | NM_001146070:c.T1218A;p.D406E         |         | chr13 | 61102577  | 61102577  | T   | A |
| ESCC-D14 | exonic   | <i>OAF</i>                                    | nonsynonymous SNV      | NM_178507:c.C109T;p.R37W              |         | chr11 | 120082096 | 120082096 | C   | T |
| ESCC-D14 | exonic   | <i>DSP</i>                                    | nonsynonymous SNV      | NM_004415:c.C5125G;p.L1709V           |         | chr6  | 7581548   | 7581548   | C   | G |
| ESCC-D14 | exonic   | <i>LIN7B</i>                                  | nonsynonymous SNV      | NM_022165:c.C524T;p.P175L             |         | chr19 | 49621197  | 49621197  | C   | T |
| ESCC-D14 | exonic   | <i>MAP2D1</i>                                 | stopgain SNV           | NM_018067:c.C1129T;p.R377X            |         | chr1  | 36642078  | 36642078  | C   | T |
| ESCC-D14 | exonic   | <i>CYP2J2</i>                                 | nonsynonymous SNV      | NM_000775:c.C255A;p.D85E              |         | chr1  | 60381728  | 60381728  | G   | T |
| ESCC-D14 | exonic   | <i>GA7</i>                                    | nonsynonymous SNV      | NM_001014435:c.G142A;p.D48N           |         | chr16 | 66884515  | 66884515  | G   | A |
| ESCC-D14 | exonic   | <i>NACA</i>                                   | nonsynonymous SNV      | NM_001113203:c.C2066T;p.P689L         |         | chr12 | 57109789  | 57109789  | G   | A |
| ESCC-D14 | exonic   | <i>OR4L1</i>                                  | nonsynonymous SNV      | NM_001004717:c.G250A;p.D84N           |         | chr14 | 20528453  | 20528453  | G   | A |
| ESCC-D14 | exonic   | <i>RAI1</i>                                   | nonsynonymous SNV      | NM_030665:c.G840C;p.Q280H             |         | chr17 | 17697102  | 17697102  | G   | C |
| ESCC-D14 | exonic   | <i>ABCA3</i>                                  | nonsynonymous SNV      | NM_001089:c.G4571A;p.S1524N           |         | chr16 | 2328436   | 2328436   | C   | T |
| ESCC-D14 | exonic   | <i>OR4L1</i>                                  | frameshift insertion   | NM_001004717:c.247_248insCp.I83fs     |         | chr14 | 20528450  | 20528450  | -   | C |
| ESCC-D14 | exonic   | <i>PLIN1</i>                                  | nonsynonymous SNV      | NM_001145311:c.G1348A;p.A450T         |         | chr15 | 90209035  | 90209035  | C   | T |
| ESCC-D14 | exonic   | <i>UNC13D</i>                                 | nonsynonymous SNV      | NM_199242:c.G3194A;p.R1065Q           |         | chr17 | 73824125  | 73824125  | C   | T |
| ESCC-D15 | exonic   | <i>TMEM106A</i>                               | nonsynonymous SNV      | NM_145041:c.A532T;p.N178Y             |         | chr17 | 41368570  | 41368570  | A   | T |
| ESCC-D15 | exonic   | <i>FBN1</i>                                   | nonsynonymous SNV      | NM_000138:c.A169G;p.N57D              |         | chr15 | 48905285  | 48905285  | T   | C |
| ESCC-D15 | exonic   | <i>TEX2</i>                                   | nonsynonymous SNV      | NM_018469:c.A2138T;p.E713V            |         | chr17 | 62270957  | 62270957  | T   | A |
| ESCC-D15 | exonic   | <i>TEX2</i>                                   | stopgain SNV           | NM_018469:c.G2137T;p.E713X            |         | chr17 | 62270958  | 62270958  | C   | A |
| ESCC-D15 | exonic   | <i>MC1R</i>                                   | nonsynonymous SNV      | NM_002386:c.G556A;p.V186M             |         | chr16 | 89986222  | 89986222  | G   | A |
| ESCC-D15 | exonic   | <i>SCN11A</i>                                 | nonsynonymous SNV      | NM_014139:c.G4959C;p.L1653F           |         | chr3  | 38888602  | 38888602  | C   | G |
| ESCC-D15 | exonic   | <i>TTI1</i>                                   | nonsynonymous SNV      | NM_014657:c.G2530T;p.D844Y            |         | chr20 | 36631152  | 36631152  | C   | A |
| ESCC-D15 | exonic   | <i>ANKHD1,ANKH1</i>                           | nonsynonymous SNV      | NM_017747:c.C6028G;p.Q2010E           |         | chr5  | 139908559 | 139908559 | C   | G |
| ESCC-D15 | exonic   | <i>KIAA1432</i>                               | nonsynonymous SNV      | NM_001135920:c.C1489T;p.R497W         |         | chr9  | 5753236   | 5753236   | C   | T |
| ESCC-D15 | exonic   | <i>OR2A12</i>                                 | nonsynonymous SNV      | NM_001004135:c.G905C;p.R302T          |         | chr7  | 143793105 | 143793105 | G   | C |
| ESCC-D15 | exonic   | <i>MUC17</i>                                  | nonsynonymous SNV      | NM_001040105:c.G547C;p.D183H          |         | chr7  | 100675244 | 100675244 | G   | C |
| ESCC-D15 | exonic   | <i>ADRA2A</i>                                 | nonsynonymous SNV      | NM_000681:c.C745T;p.R249W             |         | chr10 | 112838499 | 112838499 | C   | T |
| ESCC-D15 | exonic   | <i>MICAL2</i>                                 | nonsynonymous SNV      | NM_014632:c.G2561A;p.R854K            |         | chr11 | 12264222  | 12264222  | G   | A |
| ESCC-D15 | exonic   | <i>MYRIP</i>                                  | nonsynonymous SNV      | NM_015460:c.A227C;p.N76T              |         | chr3  | 40085657  | 40085657  | A   | C |
| ESCC-D15 | exonic   | <i>CXorf66</i>                                | nonsynonymous SNV      | NM_001013403:c.T307C;p.S103P          |         | chrX  | 139038834 | 139038834 | A   | G |
| ESCC-D15 | exonic   | <i>COL22A1</i>                                | nonsynonymous SNV      | NM_152888:c.G1525A;p.A509T            |         | chr8  | 139815147 | 139815147 | C   | T |
| ESCC-D15 | exonic   | <i>MAB2L1L1</i>                               | stopgain SNV           | NM_005584:c.C934T;p.Q312X             |         | chr13 | 36049342  | 36049342  | G   | A |
| ESCC-D15 | exonic   | <i>ZC3H6</i>                                  | nonsynonymous SNV      | NM_198581:c.G2830A;p.E944K            |         | chr2  | 113089325 | 113089325 | G   | A |
| ESCC-D15 | exonic   | <i>MYH15</i>                                  | nonsynonymous SNV      | NM_014981:c.G2869A;p.D957N            |         | chr3  | 108159954 | 108159954 | C   | T |
| ESCC-D15 | exonic   | <i>MUC5B</i>                                  | stopgain SNV           | NM_002458:c.G3790T;p.E1264X           |         | chr11 | 1261425   | 1261425   | G   | T |
| ESCC-D15 | exonic   | <i>LRP1B</i>                                  | nonsynonymous SNV      | NM_018557:c.G10539C;p.Q3513H          |         | chr2  | 141135848 | 141135848 | C   | G |
| ESCC-D15 | exonic   | <i>PDHA2</i>                                  | nonsynonymous SNV      | NM_005390:c.G286A;p.E96K              |         | chr4  | 96761587  | 96761587  | G   | A |
| ESCC-D15 | exonic   | <i>CSK</i>                                    | nonsynonymous SNV      | NM_004383:c.G340A;p.G114R             |         | chr15 | 75091710  | 75091710  | G   | A |
| ESCC-D15 | exonic   | <i>ZNF207</i>                                 | nonsynonymous SNV      | NM_001032293:c.C944T;p.A315V          |         | chr17 | 30694906  | 30694906  | C   | T |

|          |          |                                              |                      |                                    |       |           |           |   |   |
|----------|----------|----------------------------------------------|----------------------|------------------------------------|-------|-----------|-----------|---|---|
| ESCC-D15 | exonic   | <i>C3</i>                                    | nonsynonymous SNV    | NM_000064:c.C262T;p.A876V          | chr19 | 6697524   | 6697524   | G | A |
| ESCC-D15 | exonic   | <i>TRIM33</i>                                | nonsynonymous SNV    | NM_015906:c.G2738T;p.C913F         | chr1  | 114948062 | 114948062 | C | A |
| ESCC-D15 | exonic   | <i>CLEC4F</i>                                | nonsynonymous SNV    | NM_173535:c.G1562A;p.S521N         | chr2  | 71036967  | 71036967  | C | T |
| ESCC-D15 | exonic   | <i>EAPP</i>                                  | frameshift insertion | NM_018453:c.375_376insA;p.K125fs   | chr14 | 34998659  | 34998659  | - | T |
| ESCC-D15 | exonic   | <i>GPR37</i>                                 | nonsynonymous SNV    | NM_005302:c.G1225T;p.G409W         | chr7  | 124387196 | 124387196 | C | A |
| ESCC-D15 | exonic   | <i>MKI67</i>                                 | nonsynonymous SNV    | NM_001145966:c.T7960A;p.C2654S     | chr10 | 129901064 | 129901064 | A | T |
| ESCC-D15 | exonic   | <i>HIST1H1C</i>                              | nonsynonymous SNV    | NM_005319:c.G220C;p.E74Q           | chr6  | 26056437  | 26056437  | C | G |
| ESCC-D15 | exonic   | <i>TATDN2</i>                                | frameshift insertion | NM_014760:c.1604_1605insT;p.S535fs | chr3  | 10312470  | 10312470  | - | T |
| ESCC-D15 | exonic   | <i>NF1</i>                                   | nonsynonymous SNV    | NM_000267:c.C7144G;p.P2382A        | chr17 | 29676155  | 29676155  | C | G |
| ESCC-D15 | exonic   | <i>SIPA1L2</i>                               | nonsynonymous SNV    | NM_020808:c.G1861C;p.E621Q         | chr1  | 232619658 | 232619658 | C | G |
| ESCC-D15 | exonic   | <i>DPCK1</i>                                 | nonsynonymous SNV    | NM_080870:c.A2909T;p.N970I         | chr6  | 30919150  | 30919150  | A | T |
| ESCC-D15 | exonic   | <i>KIAA1009</i>                              | nonsynonymous SNV    | NM_014895:c.G1585C;p.E529Q         | chr6  | 84894983  | 84894983  | C | G |
| ESCC-D15 | exonic   | <i>DNAH6</i>                                 | nonsynonymous SNV    | NM_001370:c.G529A;p.E177K          | chr2  | 84756157  | 84756157  | G | A |
| ESCC-D15 | exonic   | <i>OR10W1</i>                                | nonsynonymous SNV    | NM_207374:c.G878A;p.G293E          | chr11 | 58034453  | 58034453  | C | T |
| ESCC-D15 | exonic   | <i>KLHD7A</i>                                | nonsynonymous SNV    | NM_152375:c.C1672T;p.R558C         | chr1  | 18809147  | 18809147  | C | T |
| ESCC-D15 | exonic   | <i>COLEC12</i>                               | nonsynonymous SNV    | NM_130386:c.G2114A;p.G705E         | chr18 | 321757    | 321757    | C | T |
| ESCC-D15 | exonic   | <i>HMCN1</i>                                 | nonsynonymous SNV    | NM_031935:c.C10394A;p.P3465H       | chr1  | 186064474 | 186064474 | C | A |
| ESCC-D15 | exonic   | <i>FTCHD3</i>                                | nonsynonymous SNV    | NM_001034842:c.A1691C;p.K564I      | chr10 | 27687836  | 27687836  | T | G |
| ESCC-D15 | exonic   | <i>ACAN</i>                                  | nonsynonymous SNV    | NM_001135:c.G6428A;p.R2143K        | chr15 | 89402244  | 89402244  | G | A |
| ESCC-D15 | exonic   | <i>FBXO46</i>                                | nonsynonymous SNV    | NM_001080469:c.C276G;p.I92M        | chr19 | 46216478  | 46216478  | G | C |
| ESCC-D15 | exonic   | <i>TRIM34,TRIM6-5</i>                        | nonsynonymous SNV    | NM_001003827:c.C1241G;p.S414C      | chr11 | 5664713   | 5664713   | C | G |
| ESCC-D15 | exonic   | <i>NPR1</i>                                  | nonsynonymous SNV    | NM_000906:c.G2588A;p.R863H         | chr1  | 153661687 | 153661687 | G | A |
| ESCC-D15 | exonic   | <i>PPP4R1</i>                                | nonsynonymous SNV    | NM_001042388:c.G806A;p.R269Q       | chr18 | 9583227   | 9583227   | C | T |
| ESCC-D15 | exonic   | <i>TRPM6</i>                                 | nonsynonymous SNV    | NM_001177310:c.G2374T;p.V792L      | chr9  | 77411659  | 77411659  | C | A |
| ESCC-D15 | exonic   | <i>ZNF643</i>                                | nonsynonymous SNV    | NM_023070:c.C298T;p.R100W          | chr1  | 40922701  | 40922701  | C | T |
| ESCC-D15 | exonic   | <i>NEURL4</i>                                | nonsynonymous SNV    | NM_001005408:c.A2877T;p.E959D      | chr17 | 7225095   | 7225095   | T | A |
| ESCC-D15 | exonic   | <i>CGN</i>                                   | nonsynonymous SNV    | NM_020770:c.A3091G;p.K101E         | chr1  | 151508268 | 151508268 | A | G |
| ESCC-D15 | exonic   | <i>NOTCH1</i>                                | stopgain SNV         | NM_017617:c.C5287T;p.Q1763X        | chr9  | 139396821 | 139396821 | G | A |
| ESCC-D15 | exonic   | <i>KRTAP10-1</i>                             | nonsynonymous SNV    | NM_198691:c.G788T;p.C263F          | chr21 | 45959246  | 45959246  | C | A |
| ESCC-D15 | exonic   | <i>HIST1H2AG</i>                             | stopgain SNV         | NM_021064:c.C337T;p.Q113X          | chr6  | 27101187  | 27101187  | C | T |
| ESCC-D15 | exonic   | <i>PPP1R7</i>                                | nonsynonymous SNV    | NM_002712:c.G55C;p.D19H            | chr2  | 242092893 | 242092893 | G | C |
| ESCC-D15 | exonic   | <i>CACNA2D1</i>                              | nonsynonymous SNV    | NM_000722:c.A401G;p.E134G          | chr7  | 81746485  | 81746485  | T | C |
| ESCC-D15 | exonic   | <i>C14orf43</i>                              | nonsynonymous SNV    | NM_001043318:c.T2488G;p.S830A      | chr14 | 74192061  | 74192061  | A | C |
| ESCC-D15 | splicing | <i>MUC2(NM_002457:exon21:c.2775+1G&gt;T)</i> |                      |                                    | chr11 | 1085855   | 1085855   | G | T |
| ESCC-D15 | exonic   | <i>CHD2</i>                                  | nonsynonymous SNV    | NM_001042572:c.A11G;p.N4S          | chr15 | 93444478  | 93444478  | A | G |
| ESCC-D16 | exonic   | <i>USP24</i>                                 | nonsynonymous SNV    | NM_015306:c.G3688C;p.E1230Q        | chr1  | 55591379  | 55591379  | C | G |
| ESCC-D16 | exonic   | <i>ZNF750</i>                                | stopgain SNV         | NM_024702:c.906delC;p.Y302X        | chr17 | 80789425  | 80789425  | G | - |
| ESCC-D16 | exonic   | <i>IPO9</i>                                  | nonsynonymous SNV    | NM_018085:c.A2120G;p.N707S         | chr1  | 201838833 | 201838833 | A | G |
| ESCC-D16 | exonic   | <i>FILP1L</i>                                | nonsynonymous SNV    | NM_014890:c.A1531T;p.N511Y         | chr3  | 99568269  | 99568269  | T | A |
| ESCC-D16 | splicing | <i>SHCBP1(NM_024745:exon5:c.596+2T&gt;A)</i> |                      |                                    | chr16 | 46649856  | 46649856  | A | T |
| ESCC-D16 | exonic   | <i>TFAP2B</i>                                | nonsynonymous SNV    | NM_003221:c.G1237A;p.A413T         | chr6  | 50810959  | 50810959  | G | A |
| ESCC-D16 | exonic   | <i>ZFP42</i>                                 | stopgain SNV         | NM_174900:c.C574T;p.Q192X          | chr4  | 188924535 | 188924535 | C | T |
| ESCC-D16 | exonic   | <i>MRC2</i>                                  | nonsynonymous SNV    | NM_006039:c.C26A;p.A9E             | chr17 | 60705189  | 60705189  | C | A |
| ESCC-D16 | exonic   | <i>BAZ1A</i>                                 | nonsynonymous SNV    | NM_182648:c.G3491A;p.R1164Q        | chr14 | 35234102  | 35234102  | C | T |
| ESCC-D16 | exonic   | <i>ZFP82</i>                                 | nonsynonymous SNV    | NM_133466:c.C544T;p.R182C          | chr19 | 36884698  | 36884698  | G | A |
| ESCC-D16 | exonic   | <i>ANK1</i>                                  | nonsynonymous SNV    | NM_000037:c.G5245C;p.E1749Q        | chr8  | 41525934  | 41525934  | C | G |
| ESCC-D16 | exonic   | <i>USP29</i>                                 | nonsynonymous SNV    | NM_020903:c.G1891A;p.E631K         | chr19 | 57641934  | 57641934  | G | A |
| ESCC-D16 | exonic   | <i>ATRNL1</i>                                | nonsynonymous SNV    | NM_207303:c.C4096T;p.R1366W        | chr10 | 117704246 | 117704246 | C | T |
| ESCC-D16 | exonic   | <i>TSPAN10</i>                               | unknown              | UNKNOWN                            | chr17 | 79615057  | 79615057  | G | A |
| ESCC-D16 | exonic   | <i>PDE11A</i>                                | nonsynonymous SNV    | NM_001077196:c.G43C;p.E15Q         | chr2  | 178705103 | 178705103 | C | G |
| ESCC-D16 | exonic   | <i>ZNF185</i>                                | nonsynonymous SNV    | NM_001178115:c.G28C;p.G10R         | chrX  | 152110280 | 152110280 | G | C |
| ESCC-D16 | exonic   | <i>C11orf48</i>                              | nonsynonymous SNV    | NM_024099:c.G271C;p.E91Q           | chr11 | 62437155  | 62437155  | C | G |
| ESCC-D16 | exonic   | <i>RBM25</i>                                 | nonsynonymous SNV    | NM_021239:c.G1792A;p.E598K         | chr14 | 73577638  | 73577638  | G | A |
| ESCC-D16 | exonic   | <i>ATP11B</i>                                | nonsynonymous SNV    | NM_014616:c.G3171C;p.Q1057H        | chr3  | 182616413 | 182616413 | G | C |

|          |                 |                                                                                               |                      |                                      |                            |       |           |           |    |   |
|----------|-----------------|-----------------------------------------------------------------------------------------------|----------------------|--------------------------------------|----------------------------|-------|-----------|-----------|----|---|
| ESCC-D16 | exonic          | <i>GPR39</i>                                                                                  | nonsynonymous SNV    | NM_001508:c.C962T;p.A321V            |                            | chr2  | 133402779 | 133402779 | C  | T |
| ESCC-D16 | exonic          | <i>RQCD1</i>                                                                                  | stopgain SNV         | NM_005444:c.C273A;p.C91X             |                            | chr2  | 219447762 | 219447762 | C  | A |
| ESCC-D16 | exonic          | <i>COBL</i>                                                                                   | stopgain SNV         | NM_015198:c.C283T;p.Q95X             |                            | chr7  | 51261249  | 51261249  | G  | A |
| ESCC-D16 | exonic          | <i>PLA2G7</i>                                                                                 | nonsynonymous SNV    | NM_001168357:c.C697T;p.L233F         |                            | chr6  | 46678362  | 46678362  | G  | A |
| ESCC-D16 | exonic;splicing | <i>MGAM;MGAM</i>                                                                              | nonsynonymous SNV    | NM_004668:c.A3950C;p.D1317A          |                            | chr7  | 141759657 | 141759657 | A  | C |
| ESCC-D16 | exonic          | <i>SEMA3A</i>                                                                                 | nonsynonymous SNV    | NM_006080:c.G787T;p.A260S            |                            | chr7  | 83643557  | 83643557  | C  | A |
| ESCC-D16 | exonic          | <i>DLA</i>                                                                                    | nonsynonymous SNV    | NM_019074:c.G1337A;p.R446H           |                            | chr15 | 41228522  | 41228522  | G  | A |
| ESCC-D16 | exonic          | <i>RG52</i>                                                                                   | nonsynonymous SNV    | NM_002923:c.C210G;p.I70M             |                            | chr1  | 192779395 | 192779395 | C  | G |
| ESCC-D16 | exonic          | <i>C8orf45</i>                                                                                | stopgain SNV         | NM_001136160:c.C220T;p.Q74X          |                            | chr8  | 67786686  | 67786686  | C  | T |
| ESCC-D16 | exonic          | <i>NEDD4</i>                                                                                  | nonsynonymous SNV    | NM_006154:c.C241T;p.H81Y             |                            | chr15 | 56216894  | 56216894  | G  | A |
| ESCC-D16 | exonic          | <i>TACR2</i>                                                                                  | nonsynonymous SNV    | NM_001057:c.C294G;p.I98M             |                            | chr10 | 71175786  | 71175786  | G  | C |
| ESCC-D16 | exonic          | <i>SLCO1A2</i>                                                                                | nonsynonymous SNV    | NM_021094:c.T482C;p.V161A            |                            | chr12 | 21457468  | 21457468  | A  | G |
| ESCC-D16 | exonic          | <i>FAM196B</i>                                                                                | nonsynonymous SNV    | NM_001129891:c.G1217A;p.R406Q        |                            | chr5  | 169309686 | 169309686 | C  | T |
| ESCC-D16 | exonic          | <i>CACNA1E</i>                                                                                | nonsynonymous SNV    | NM_000721:c.G94T;p.A32S              |                            | chr1  | 181452974 | 181452974 | G  | T |
| ESCC-D16 | exonic          | <i>TRIM10</i>                                                                                 | nonsynonymous SNV    | NM_006778:c.G1349C;p.R450P           |                            | chr6  | 30121843  | 30121843  | C  | G |
| ESCC-D16 | exonic          | <i>RG521</i>                                                                                  | nonsynonymous SNV    | NM_001039152:c.G190A;p.D64N          |                            | chr1  | 192321278 | 192321278 | G  | A |
| ESCC-D16 | exonic          | <i>APLN</i>                                                                                   | nonsynonymous SNV    | NM_005161:c.G442A;p.V148M            |                            | chr11 | 57004037  | 57004037  | C  | T |
| ESCC-D16 | exonic          | <i>CDH10</i>                                                                                  | nonsynonymous SNV    | NM_006727:c.G1822A;p.G608S           |                            | chr5  | 24491739  | 24491739  | C  | T |
| ESCC-D16 | exonic          | <i>PRIMA1</i>                                                                                 | nonsynonymous SNV    | NM_178013:c.C74T;p.P25L              |                            | chr14 | 94253991  | 94253991  | G  | A |
| ESCC-D16 | exonic          | <i>DDX1</i>                                                                                   | nonsynonymous SNV    | NM_004939:c.G1798A;p.E600K           |                            | chr2  | 15768800  | 15768800  | G  | A |
| ESCC-D16 | exonic          | <i>BANF1</i>                                                                                  | nonsynonymous SNV    | NM_001143985:c.G211A;p.A71T          |                            | chr11 | 65771184  | 65771184  | G  | A |
| ESCC-D16 | exonic;splicing | <i>C8orf45;C8orf45</i>                                                                        | frameshift deletion  | NM_001136160:c.223_224del;p.75_75del |                            | chr8  | 67786689  | 67786690  | TC | - |
| ESCC-D16 | exonic          | <i>C1orf106</i>                                                                               | nonsynonymous SNV    | NM_001142569:c.G649C;p.E217Q         |                            | chr1  | 200877932 | 200877932 | G  | C |
| ESCC-D16 | exonic          | <i>SHROOM3</i>                                                                                | nonsynonymous SNV    | NM_020859:c.G3007A;p.A1003T          |                            | chr4  | 77662333  | 77662333  | G  | A |
| ESCC-D16 | exonic          | <i>ZNF717</i>                                                                                 | nonsynonymous SNV    | NM_001128223:c.C2662T;p.H888Y        |                            | chr3  | 75786112  | 75786112  | G  | A |
| ESCC-D16 | exonic          | <i>RP1</i>                                                                                    | nonsynonymous SNV    | NM_006269:c.T1211C;p.L404S           |                            | chr8  | 55537653  | 55537653  | T  | C |
| ESCC-D16 | exonic          | <i>KPNA1</i>                                                                                  | nonsynonymous SNV    | NM_002264:c.T1075G;p.C359G           |                            | chr3  | 122156064 | 122156064 | A  | C |
| ESCC-D16 | exonic          | <i>CDH10</i>                                                                                  | nonsynonymous SNV    | NM_006727:c.C220A;p.T735N            |                            | chr5  | 24487935  | 24487935  | G  | T |
| ESCC-D16 | exonic          | <i>CEP164</i>                                                                                 | nonsynonymous SNV    | NM_014956:c.C445G;p.P149A            |                            | chr11 | 117232602 | 117232602 | C  | G |
| ESCC-D16 | exonic          | <i>C16orf62</i>                                                                               | nonsynonymous SNV    | NM_020314:c.A418G;p.K140E            |                            | chr16 | 19580779  | 19580779  | A  | G |
| ESCC-D16 | exonic          | <i>MTOR</i>                                                                                   | nonsynonymous SNV    | NM_004958:c.G375T;p.M125I            |                            | chr1  | 11317119  | 11317119  | C  | A |
| ESCC-D16 | exonic          | <i>SYNM</i>                                                                                   | unknown              | UNKNOWN                              |                            | chr15 | 99673140  | 99673140  | G  | A |
| ESCC-D16 | exonic          | <i>MUC2</i>                                                                                   | nonsynonymous SNV    | NM_002457:c.C4679T;p.T1560M          |                            | chr11 | 1092860   | 1092860   | C  | T |
| ESCC-D16 | exonic          | <i>SLC4A3</i>                                                                                 | nonsynonymous SNV    | NM_005070:c.T3332G;p.F1111C          |                            | chr2  | 220505206 | 220505206 | T  | G |
| ESCC-D16 | exonic          | <i>EIF3H</i>                                                                                  | nonsynonymous SNV    | NM_003756:c.G595C;p.E199Q            |                            | chr8  | 117668207 | 117668207 | C  | G |
| ESCC-D16 | exonic          | <i>GLEC6A</i>                                                                                 | nonsynonymous SNV    | NM_001007033:c.G590C;p.R197T         |                            | chr12 | 8630020   | 8630020   | G  | C |
| ESCC-D16 | splicing        | <i>CDRT4(NM_001204477:exon4:c.28+2T&gt;A);FAM18B2-CDRT4(NM_001204478:exon7:c.537+2T&gt;A)</i> |                      |                                      |                            | chr17 | 15343523  | 15343523  | A  | T |
| ESCC-D16 | splicing        | <i>CREB3L1(NM_052854:exon11:c.1523+2T&gt;G)</i>                                               |                      |                                      |                            | chr11 | 46342081  | 46342081  | T  | G |
| ESCC-D16 | exonic          | <i>ORS11</i>                                                                                  | nonsynonymous SNV    | NM_001005245:c.C158G;p.S53C          |                            | chr1  | 11317119  | 11317119  | C  | A |
| ESCC-D16 | exonic          | <i>MUC6</i>                                                                                   | nonsynonymous SNV    | NM_005961:c.C5912T;p.P1971L          |                            | chr11 | 1016889   | 1016889   | G  | A |
| ESCC-D16 | exonic          | <i>RCN2</i>                                                                                   | nonsynonymous SNV    | NM_002902:c.C597A;p.D199E            |                            | chr15 | 77239797  | 77239797  | C  | A |
| ESCC-D17 | exonic          | <i>BIRC3</i>                                                                                  | nonsynonymous SNV    | NM_001165:c.T2A;p.M1K                |                            | chr11 | 102195242 | 102195242 | T  | A |
| ESCC-D17 | exonic          | <i>OR4D11</i>                                                                                 | nonsynonymous SNV    | NM_001004706:c.C184A;p.L62M          |                            | chr11 | 59271232  | 59271232  | C  | A |
| ESCC-D17 | exonic          | <i>CTNNA3</i>                                                                                 | stopgain SNV         | NM_001127384:c.C889T;p.R297X         | 1474872                    | chr10 | 68940233  | 68940233  | G  | A |
| ESCC-D17 | exonic          | <i>CACNA1B</i>                                                                                | nonsynonymous SNV    | NM_000718:c.C6473T;p.P2158L          |                            | chr9  | 141015317 | 141015317 | C  | T |
| ESCC-D17 | exonic          | <i>LINS</i>                                                                                   | nonsynonymous SNV    | NM_001040616:c.A1655T;p.Y552F        |                            | chr15 | 101110062 | 101110062 | T  | A |
| ESCC-D17 | exonic          | <i>ASTN2</i>                                                                                  | nonsynonymous SNV    | NM_014010:c.C910T;p.R304W            |                            | chr9  | 119976742 | 119976742 | G  | A |
| ESCC-D17 | exonic          | <i>MYO9A</i>                                                                                  | frameshift insertion | NM_006901:c.4783_4784insA;p.P1595fs  |                            | chr15 | 72190061  | 72190061  | -  | T |
| ESCC-D17 | exonic          | <i>TP53</i>                                                                                   | stopgain SNV         | NM_001126115:c.C628T;p.R210X         | 753614;905938;905984;90727 | chr17 | 7574003   | 7574003   | G  | A |
| ESCC-D17 | exonic          | <i>DGKB</i>                                                                                   | nonsynonymous SNV    | NM_004080:c.G1685C;p.W562S           |                            | chr7  | 14613925  | 14613925  | C  | G |
| ESCC-D17 | exonic          | <i>BCORL1</i>                                                                                 | frameshift insertion | NM_021946:c.4673_4674insT;p.D1558fs  |                            | chrX  | 129184746 | 129184746 | -  | T |
| ESCC-D17 | exonic          | <i>MED13</i>                                                                                  | nonsynonymous SNV    | NM_005121:c.A3689G;p.N1230S          | 1560555                    | chr17 | 60059675  | 60059675  | T  | C |
| ESCC-D17 | exonic          | <i>WHAMM</i>                                                                                  | nonsynonymous SNV    | NM_001080435:c.C1883T;p.T628I        |                            | chr15 | 83499592  | 83499592  | C  | T |
| ESCC-D17 | exonic          | <i>DMRT2</i>                                                                                  | nonsynonymous SNV    | NM_181872:c.G1609A;p.V537M           |                            | chr9  | 1057196   | 1057196   | G  | A |



|          |                 |                                                 |                        |                                        |                            |       |           |           |     |   |
|----------|-----------------|-------------------------------------------------|------------------------|----------------------------------------|----------------------------|-------|-----------|-----------|-----|---|
| ESCC-D17 | exonic          | <i>HTRA1</i>                                    | nonframeshift deletion | NM_002775:c.1135_1137del;p.379_379del  |                            | chr10 | 124269626 | 124269628 | AAG | - |
| ESCC-D17 | exonic          | <i>MCOLN1</i>                                   | nonsynonymous SNV      | NM_020533:c.C89T;p.P30L                |                            | chr19 | 7589904   | 7589904   | C   | T |
| ESCC-D17 | exonic          | <i>FASTKD1</i>                                  | nonsynonymous SNV      | NM_024622:c.G953C;p.G318A              |                            | chr2  | 170416915 | 170416915 | C   | G |
| ESCC-D17 | exonic          | <i>DMD</i>                                      | nonsynonymous SNV      | NM_004011:c.A227G;p.D759V              |                            | chrX  | 32235172  | 32235172  | T   | A |
| ESCC-D17 | exonic          | <i>ZNF180</i>                                   | nonsynonymous SNV      | NM_013256:c.G1829T;p.C610F             |                            | chr19 | 44980869  | 44980869  | C   | A |
| ESCC-D17 | exonic          | <i>DMD</i>                                      | nonsynonymous SNV      | NM_004011:c.T227A;p.F758L              |                            | chrX  | 32235174  | 32235174  | A   | T |
| ESCC-D17 | exonic          | <i>AGMAT</i>                                    | nonsynonymous SNV      | NM_024758:c.T1016C;p.L339P             |                            | chr1  | 15900189  | 15900189  | A   | G |
| ESCC-D17 | exonic          | <i>TMEM39B</i>                                  | nonsynonymous SNV      | NM_018056:c.C258G;p.F86L               |                            | chr1  | 32541330  | 32541330  | C   | G |
| ESCC-D17 | exonic          | <i>EPHB1</i>                                    | nonsynonymous SNV      | NM_004441:c.C2336A;p.T779N             |                            | chr3  | 134920521 | 134920521 | C   | A |
| ESCC-D17 | exonic          | <i>CHD1L</i>                                    | nonframeshift deletion | NM_001256338:c.581_583del;p.194_195del |                            | chr1  | 146743865 | 146743867 | GAG | - |
| ESCC-D17 | exonic;splicing | <i>NSFL1C;NSFL1C</i>                            | nonsynonymous SNV      | NM_016143:c.C446T;p.P149L              |                            | chr20 | 1434949   | 1434949   | G   | A |
| ESCC-D17 | exonic          | <i>FASTKD1</i>                                  | nonsynonymous SNV      | NM_024622:c.G2509C;p.E837Q             |                            | chr2  | 170386370 | 170386370 | C   | G |
| ESCC-D17 | exonic          | <i>RBI</i>                                      | nonsynonymous SNV      | NM_000321:c.A1664C;p.H555P             | 687562:906844:907072:90812 | chr13 | 48955548  | 48955548  | A   | C |
| ESCC-D17 | splicing        | <i>WFDC10B</i>                                  |                        |                                        |                            | chr20 | 44314694  | 44314694  | G   | C |
| ESCC-D17 | exonic          | <i>ANK2</i>                                     | nonsynonymous SNV      | NM_001148:c.G1411T;p.A471S             |                            | chr4  | 114186077 | 114186077 | G   | T |
| ESCC-D17 | exonic          | <i>SNX31</i>                                    | nonsynonymous SNV      | NM_152628:c.G59A;p.R20H                |                            | chr8  | 101661684 | 101661684 | C   | T |
| ESCC-D17 | exonic          | <i>RTKN</i>                                     | nonsynonymous SNV      | NM_001015055:c.G777T;p.L259F           |                            | chr2  | 74656048  | 74656048  | C   | A |
| ESCC-D17 | exonic          | <i>SEMA4C</i>                                   | nonsynonymous SNV      | NM_017789:c.C1631T;p.S544L             |                            | chr2  | 97527357  | 97527357  | G   | A |
| ESCC-D17 | exonic          | <i>NISCH</i>                                    | nonsynonymous SNV      | NM_007184:c.G3089A;p.G1030D            |                            | chr3  | 52522597  | 52522597  | G   | A |
| ESCC-D17 | exonic          | <i>PLXNA4</i>                                   | nonsynonymous SNV      | NM_020911:c.G1587T;p.W529C             |                            | chr7  | 131925842 | 131925842 | C   | A |
| ESCC-D17 | exonic          | <i>PDZRN3</i>                                   | nonsynonymous SNV      | NM_015009:c.T244A;p.C82S               |                            | chr3  | 73673733  | 73673733  | A   | T |
| ESCC-D17 | exonic          | <i>ADRBK2</i>                                   | nonsynonymous SNV      | NM_005160:c.T1895C;p.L632S             |                            | chr22 | 26117354  | 26117354  | T   | C |
| ESCC-D17 | exonic          | <i>FAM208B</i>                                  | nonsynonymous SNV      | NM_017782:c.T4588C;p.S1530P            |                            | chr10 | 5789972   | 5789972   | T   | C |
| ESCC-D17 | exonic          | <i>BICD2</i>                                    | nonsynonymous SNV      | NM_001003800:c.C50A;p.A17E             |                            | chr9  | 95526977  | 95526977  | G   | T |
| ESCC-D17 | exonic          | <i>KIF11</i>                                    | frameshift deletion    | NM_004523:c.1762_1763del;p.588_588del  |                            | chr10 | 94393439  | 94393440  | TC  | - |
| ESCC-D17 | exonic          | <i>ALG10B</i>                                   | nonsynonymous SNV      | NM_001013620:c.C1042A;p.L348I          |                            | chr12 | 38714635  | 38714635  | C   | A |
| ESCC-D17 | exonic          | <i>ZFYVE26</i>                                  | nonsynonymous SNV      | NM_015346:c.G4504A;p.A1502T            |                            | chr14 | 68248115  | 68248115  | C   | T |
| ESCC-D17 | exonic          | <i>APBA1</i>                                    | nonsynonymous SNV      | NM_001163:c.G1679A;p.R560H             |                            | chr9  | 72071272  | 72071272  | C   | T |
| ESCC-D17 | exonic          | <i>SNX8</i>                                     | nonsynonymous SNV      | NM_013321:c.C839T;p.T280M              |                            | chr7  | 2302941   | 2302941   | G   | A |
| ESCC-D18 | exonic          | <i>DQX1</i>                                     | nonsynonymous SNV      | NM_133637:c.T1700G;p.L567R             |                            | chr2  | 74746789  | 74746789  | A   | C |
| ESCC-D18 | exonic          | <i>OBSCN</i>                                    | nonsynonymous SNV      | NM_001098623:c.G20072T;p.S6691I        |                            | chr1  | 228557747 | 228557747 | G   | T |
| ESCC-D18 | exonic          | <i>SALL3</i>                                    | nonsynonymous SNV      | NM_171999:c.C1484T;p.S495L             |                            | chr18 | 76753475  | 76753475  | C   | T |
| ESCC-D18 | splicing        | <i>FAM194A(NM_152394:exon10:c.1041-1G&gt;T)</i> |                        |                                        |                            | chr3  | 150398326 | 150398326 | C   | A |
| ESCC-D18 | exonic          | <i>CCR2</i>                                     | nonsynonymous SNV      | NM_001123041:c.G730A;p.V244I           |                            | chr3  | 46399748  | 46399748  | G   | A |
| ESCC-D18 | exonic          | <i>CYP27C1</i>                                  | nonsynonymous SNV      | NM_001001665:c.G623A;p.R208Q           |                            | chr2  | 127953007 | 127953007 | C   | T |
| ESCC-D18 | exonic          | <i>VANGL2</i>                                   | nonsynonymous SNV      | NM_020335:c.A1192T;p.M398L             |                            | chr1  | 160393960 | 160393960 | A   | T |
| ESCC-D18 | exonic          | <i>MCM3AP</i>                                   | nonsynonymous SNV      | NM_003906:c.G5798C;p.R1933T            |                            | chr21 | 47655327  | 47655327  | C   | G |
| ESCC-D18 | exonic          | <i>CDHR1</i>                                    | nonsynonymous SNV      | NM_033100:c.T2512G;p.S838A             |                            | chr10 | 85974309  | 85974309  | T   | G |
| ESCC-D18 | exonic          | <i>ARHGAP29</i>                                 | nonsynonymous SNV      | NM_004815:c.T2782G;p.F928V             |                            | chr1  | 94643422  | 94643422  | A   | C |
| ESCC-D18 | exonic          | <i>LRR61</i>                                    | nonsynonymous SNV      | NM_023942:c.C403T;p.R135W              |                            | chr7  | 150034353 | 150034353 | C   | T |
| ESCC-D18 | exonic          | <i>DKK2</i>                                     | nonsynonymous SNV      | NM_014421:c.A526G;p.K176E              |                            | chr4  | 107845705 | 107845705 | T   | C |
| ESCC-D18 | splicing        | <i>TMED8(NM_213601:exon4:c.198-1G&gt;A)</i>     |                        |                                        |                            | chr14 | 77812822  | 77812822  | C   | T |
| ESCC-D18 | exonic          | <i>ASTN1</i>                                    | nonsynonymous SNV      | NM_004319:c.C3394T;p.R1132W            |                            | chr1  | 176845742 | 176845742 | G   | A |
| ESCC-D18 | exonic          | <i>TFEC</i>                                     | nonsynonymous SNV      | NM_001244583:c.G443A;p.R148Q           |                            | chr7  | 115581966 | 115581966 | C   | T |
| ESCC-D18 | exonic          | <i>GATAD2B</i>                                  | nonsynonymous SNV      | NM_020699:c.C28T;p.R10C                |                            | chr1  | 153800796 | 153800796 | G   | A |
| ESCC-D18 | exonic          | <i>PPM1N</i>                                    | nonsynonymous SNV      | NM_001080401:c.C127G;p.R43G            |                            | chr19 | 46001857  | 46001857  | C   | G |
| ESCC-D18 | exonic          | <i>TP53</i>                                     | stopgain SNV           | NM_001126115:c.G214T;p.E72X            |                            | chr17 | 7578239   | 7578239   | C   | A |
| ESCC-D18 | exonic          | <i>FSIP2</i>                                    | nonsynonymous SNV      | NM_173651:c.C143T;p.A48V               |                            | chr2  | 186603497 | 186603497 | C   | T |
| ESCC-D18 | exonic          | <i>MKRN3</i>                                    | nonsynonymous SNV      | NM_005664:c.C403T;p.P135S              |                            | chr15 | 23811332  | 23811332  | C   | T |
| ESCC-D18 | exonic          | <i>CYL2</i>                                     | nonsynonymous SNV      | NM_001340:c.A65G;p.E22G                |                            | chr9  | 105765430 | 105765430 | A   | G |
| ESCC-D18 | exonic          | <i>CLCN6</i>                                    | nonsynonymous SNV      | NM_001286:c.A2351G;p.D784G             |                            | chr1  | 11898447  | 11898447  | A   | G |
| ESCC-D18 | exonic          | <i>ATF6</i>                                     | nonsynonymous SNV      | NM_007348:c.G1211A;p.R404K             |                            | chr1  | 161816262 | 161816262 | G   | A |
| ESCC-D18 | exonic          | <i>PCLO</i>                                     | nonsynonymous SNV      | NM_014510:c.G7834C;p.D2612H            |                            | chr7  | 82582435  | 82582435  | C   | G |
| ESCC-D18 | exonic          | <i>DNAH6</i>                                    | nonsynonymous SNV      | NM_001370:c.C6529A;p.Q2177K            |                            | chr2  | 84899525  | 84899525  | C   | A |

|          |          |                                                                                |                        |                                          |       |           |           |     |   |
|----------|----------|--------------------------------------------------------------------------------|------------------------|------------------------------------------|-------|-----------|-----------|-----|---|
| ESCC-D18 | exonic   | <i>MATN4</i>                                                                   | nonsynonymous SNV      | NM_030592:c.T1120G;p.F374V               | chr20 | 43926870  | 43926870  | A   | C |
| ESCC-D18 | exonic   | <i>WDR66</i>                                                                   | nonsynonymous SNV      | NM_144668:c.C3248G;p.T1083R              | chr12 | 122439415 | 122439415 | C   | G |
| ESCC-D18 | exonic   | <i>CKAR</i>                                                                    | nonsynonymous SNV      | NM_000730:c.C1033T;p.R345C               | chr4  | 26483514  | 26483514  | G   | A |
| ESCC-D18 | exonic   | <i>DCAF4L2</i>                                                                 | nonsynonymous SNV      | NM_152418:c.C197T;p.P66L                 | chr8  | 88886003  | 88886003  | G   | A |
| ESCC-D18 | exonic   | <i>EPPK1</i>                                                                   | nonsynonymous SNV      | NM_031308:c.G6716A;p.R2239H              | chr8  | 144940706 | 144940706 | C   | T |
| ESCC-D18 | exonic   | <i>BCAT1</i>                                                                   | nonsynonymous SNV      | NM_001178092:c.C281T;p.S94L              | chr12 | 25031510  | 25031510  | G   | A |
| ESCC-D18 | exonic   | <i>ASPH</i>                                                                    | nonsynonymous SNV      | NM_001164754:c.G805T;p.V269L             | chr8  | 62550533  | 62550533  | C   | A |
| ESCC-D18 | exonic   | <i>ATP8B3</i>                                                                  | nonsynonymous SNV      | NM_001178002:c.C3634T;p.R1212C           | chr19 | 1783185   | 1783185   | G   | A |
| ESCC-D18 | exonic   | <i>CEACAM18</i>                                                                | nonframeshift deletion | NM_001080405:c.1077_1079del;p.359_360del | chr19 | 51986491  | 51986493  | GGA | - |
| ESCC-D18 | splicing | <i>ROBO2(NM_002942:exon8:c.1060-1G&gt;A;NM_001128929:exon7:c.1001-1G&gt;A)</i> |                        |                                          | chr3  | 77599968  | 77599968  | G   | A |
| ESCC-D18 | exonic   | <i>FBN2</i>                                                                    | nonsynonymous SNV      | NM_001999:c.G4552C;p.D1518H              | chr5  | 127654613 | 127654613 | C   | G |
| ESCC-D18 | exonic   | <i>C22orf25</i>                                                                | nonsynonymous SNV      | NM_152906:c.G156A;p.M52I                 | chr22 | 20039998  | 20039998  | G   | A |
| ESCC-D18 | exonic   | <i>C5orf42</i>                                                                 | stopgain SNV           | NM_023073:c.C5839T;p.Q1947X              | chr5  | 37177784  | 37177784  | G   | A |
| ESCC-D18 | exonic   | <i>MAPI5</i>                                                                   | nonsynonymous SNV      | NM_018174:c.C2096T;p.S699L               | chr19 | 17838289  | 17838289  | C   | T |
| ESCC-D18 | exonic   | <i>RP1L1</i>                                                                   | nonsynonymous SNV      | NM_178857:c.G3935A;p.G1312E              | chr8  | 10467673  | 10467673  | C   | T |
| ESCC-D18 | exonic   | <i>ATG7</i>                                                                    | nonsynonymous SNV      | NM_001144912:c.G695C;p.R232P             | chr3  | 11374490  | 11374490  | G   | C |
| ESCC-D18 | exonic   | <i>KPNB1</i>                                                                   | nonsynonymous SNV      | NM_002265:c.G2333C;p.G778A               | chr17 | 45755759  | 45755759  | G   | C |
| ESCC-D18 | exonic   | <i>ZNF107</i>                                                                  | nonsynonymous SNV      | NM_001013746:c.G1579A;p.E527K            | chr7  | 64168261  | 64168261  | G   | A |
| ESCC-D18 | exonic   | <i>UHRF1</i>                                                                   | unknown                | UNKNOWN                                  | chr19 | 4960731   | 4960731   | G   | T |
| ESCC-D18 | exonic   | <i>MRPL28</i>                                                                  | nonsynonymous SNV      | NM_006428:c.G244A;p.G82S                 | chr16 | 419975    | 419975    | C   | T |
| ESCC-D18 | exonic   | <i>SCD5</i>                                                                    | nonsynonymous SNV      | NM_001037582:c.G955A;p.E319K             | chr4  | 83552518  | 83552518  | C   | T |
| ESCC-D18 | exonic   | <i>HOXB2</i>                                                                   | nonsynonymous SNV      | NM_002145:c.A170G;p.Q57R                 | chr17 | 46622104  | 46622104  | T   | C |
| ESCC-D18 | exonic   | <i>GPR112</i>                                                                  | nonsynonymous SNV      | NM_153834:c.G8521T;p.V2841F              | chrX  | 135482221 | 135482221 | G   | T |
| ESCC-D18 | exonic   | <i>FND1</i>                                                                    | nonsynonymous SNV      | NM_032532:c.A4429G;p.T1477A              | chr6  | 159660797 | 159660797 | A   | G |
| ESCC-D18 | exonic   | <i>SLC2A7</i>                                                                  | nonsynonymous SNV      | NM_207420:c.C143G;p.P48R                 | chr1  | 9085042   | 9085042   | G   | C |
| ESCC-D18 | exonic   | <i>SEC22B</i>                                                                  | unknown                | UNKNOWN                                  | chr1  | 145115815 | 145115815 | A   | C |
| ESCC-D18 | exonic   | <i>TMEM184A</i>                                                                | nonsynonymous SNV      | NM_001097620:c.C1166G;p.P389R            | chr7  | 1586664   | 1586664   | G   | C |
| ESCC-D18 | exonic   | <i>NDOR1</i>                                                                   | nonsynonymous SNV      | NM_001144026:c.G236A;p.R79Q              | chr9  | 140106976 | 140106976 | G   | A |
| ESCC-D18 | exonic   | <i>TP53</i>                                                                    | frameshift deletion    | NM_001126115:c.290delG;p.C97fs           | chr17 | 7577595   | 7577595   | C   | - |
| ESCC-D18 | exonic   | <i>ZNF717</i>                                                                  | stopgain SNV           | NM_001128223:c.A2518T;p.K840X            | chr3  | 75786256  | 75786256  | T   | A |
| ESCC-D18 | exonic   | <i>TP53</i>                                                                    | nonsynonymous SNV      | NM_001126115:c.T289A;p.C97S              | chr17 | 7577596   | 7577596   | A   | T |
| ESCC-D18 | exonic   | <i>MUC6</i>                                                                    | nonsynonymous SNV      | NM_005961:c.A6219C;p.Q2073H              | chr11 | 1016582   | 1016582   | A   | G |
| ESCC-D18 | exonic   | <i>GSTM1</i>                                                                   | nonsynonymous SNV      | NM_000561:c.C4A;p.P2T                    | chr1  | 110230499 | 110230499 | C   | A |
| ESCC-D18 | exonic   | <i>ABCD1</i>                                                                   | nonsynonymous SNV      | NM_000033:c.G254A;p.R85Q                 | chrX  | 152990975 | 152990975 | G   | A |
| ESCC-D18 | exonic   | <i>OR6X1</i>                                                                   | stopgain SNV           | NM_001005188:c.T191A;p.L64X              | chr11 | 123625036 | 123625036 | A   | T |
| ESCC-D18 | exonic   | <i>HAND2</i>                                                                   | nonsynonymous SNV      | NM_021973:c.G50A;p.G17D                  | chr4  | 174450391 | 174450391 | C   | T |
| ESCC-D18 | exonic   | <i>C8orf45</i>                                                                 | stopgain SNV           | NM_001136160:c.C1368A;p.C456X            | chr8  | 67808493  | 67808493  | C   | A |
| ESCC-D18 | exonic   | <i>THSD4</i>                                                                   | nonsynonymous SNV      | NM_024817:c.C2829A;p.D943E               | chr15 | 72063462  | 72063462  | C   | A |
| ESCC-D18 | exonic   | <i>RRM2</i>                                                                    | nonsynonymous SNV      | NM_001034:c.A227C;p.N76T                 | chr2  | 10263566  | 10263566  | A   | C |
| ESCC-D18 | exonic   | <i>CCDC137</i>                                                                 | stopgain SNV           | NM_199287:c.C674A;p.S225X                | chr17 | 79639538  | 79639538  | C   | A |
| ESCC-D18 | exonic   | <i>BCO2</i>                                                                    | nonsynonymous SNV      | NM_001256400:c.C5T;p.A2V                 | chr11 | 112064223 | 112064223 | C   | T |
| ESCC-D18 | exonic   | <i>ASPN</i>                                                                    | nonsynonymous SNV      | NM_001193335:c.T117A;p.D39E              | chr9  | 95237063  | 95237063  | A   | T |
| ESCC-D18 | splicing | <i>COL24A1(NM_152890:exon4:c.1491+1G&gt;A)</i>                                 |                        |                                          | chr1  | 86590527  | 86590527  | C   | T |
| ESCC-D18 | exonic   | <i>XPO1</i>                                                                    | nonsynonymous SNV      | NM_003400:c.A1871G;p.D624G               | chr2  | 61719186  | 61719186  | T   | C |
| ESCC-D19 | exonic   | <i>GPR98</i>                                                                   | nonsynonymous SNV      | NM_032119:c.G17693T;p.R5898L             | chr5  | 90151656  | 90151656  | G   | T |
| ESCC-D19 | exonic   | <i>SNTG2</i>                                                                   | stopgain SNV           | NM_018968:c.A487T;p.K163X                | chr2  | 1161309   | 1161309   | A   | T |
| ESCC-D19 | exonic   | <i>AFF2</i>                                                                    | nonsynonymous SNV      | NM_001170628:c.A2735G;p.K912R            | chrX  | 148069085 | 148069085 | A   | G |
| ESCC-D19 | exonic   | <i>BTRC</i>                                                                    | nonsynonymous SNV      | NM_003939:c.G770C;p.R257T                | chr10 | 103292089 | 103292089 | T   | C |
| ESCC-D19 | exonic   | <i>NUDT2</i>                                                                   | nonsynonymous SNV      | NM_001244390:c.T293G;p.V98G              | chr9  | 34343287  | 34343287  | T   | G |
| ESCC-D20 | exonic   | <i>SON</i>                                                                     | nonsynonymous SNV      | NM_032195:c.G3159C;p.M1053I              | chr21 | 34924696  | 34924696  | G   | C |
| ESCC-D20 | exonic   | <i>KIF13A</i>                                                                  | nonsynonymous SNV      | NM_001105566:c.G1315C;p.G439R            | chr6  | 17831418  | 17831418  | C   | G |
| ESCC-D20 | exonic   | <i>FAM205A</i>                                                                 | nonsynonymous SNV      | NM_001141917:c.C509T;p.P170L             | chr9  | 34726728  | 34726728  | G   | A |
| ESCC-D20 | exonic   | <i>CTSK</i>                                                                    | nonsynonymous SNV      | NM_000396:c.G77T;p.W26L                  | chr1  | 150779205 | 150779205 | C   | A |
| ESCC-D20 | exonic   | <i>DNAH9</i>                                                                   | nonsynonymous SNV      | NM_001372:c.G10630A;p.E3544K             | chr17 | 11784554  | 11784554  | G   | A |



|          |                 |                                      |                        |                                             |       |           |           |     |   |
|----------|-----------------|--------------------------------------|------------------------|---------------------------------------------|-------|-----------|-----------|-----|---|
| ESCC-D20 | exonic          | LAMA3                                | stopgain SNV           | NM_001127717:c.C315A;p.C105X                | chr18 | 21293904  | 21293904  | C   | A |
| ESCC-D20 | exonic          | PIPSK1B                              | nonsynonymous SNV      | NM_003558:c.C323T;p.S108F                   | chr9  | 71503901  | 71503901  | C   | T |
| ESCC-D20 | exonic          | FNIP1                                | nonsynonymous SNV      | NM_001008738:c.G788A;p.R263H                | chr5  | 131042146 | 131042146 | C   | T |
| ESCC-D20 | exonic          | TIN                                  | nonsynonymous SNV      | NM_003319:c.G7906A;p.E26336K                | chr2  | 179395141 | 179395141 | C   | T |
| ESCC-D20 | exonic          | MFP3K15                              | nonsynonymous SNV      | NM_001001671:c.G1295C;p.S432T               | chrX  | 19443793  | 19443793  | C   | G |
| ESCC-D20 | exonic          | SLCO1C1                              | nonsynonymous SNV      | NM_001145944:c.C219G;p.F73L                 | chr12 | 20868116  | 20868116  | C   | G |
| ESCC-D20 | exonic          | IL19                                 | nonsynonymous SNV      | NM_153758:c.G417C;p.L139F                   | chr1  | 207013287 | 207013287 | G   | C |
| ESCC-D20 | exonic          | PTP22                                | nonsynonymous SNV      | NM_012411:c.C1576T;p.H526Y                  | chr1  | 114380281 | 114380281 | G   | A |
| ESCC-D20 | exonic          | CCT8L2                               | nonsynonymous SNV      | NM_014406:c.A899T;p.D300V                   | chr22 | 17072542  | 17072542  | T   | A |
| ESCC-D20 | exonic          | LPIN2                                | nonsynonymous SNV      | NM_014646:c.G470A;p.R157Q                   | chr18 | 2951173   | 2951173   | C   | T |
| ESCC-D20 | exonic          | BBS12                                | stopgain SNV           | NM_152618:c.G214T;p.E72X                    | chr4  | 123663261 | 123663261 | G   | T |
| ESCC-D20 | exonic          | PNMAL1                               | nonsynonymous SNV      | NM_001103149:c.C998G;p.S333C                | chr19 | 46973295  | 46973295  | G   | C |
| ESCC-D20 | exonic          | CWC27                                | nonsynonymous SNV      | NM_005869:c.C244A;p.P82T                    | chr5  | 64077852  | 64077852  | C   | A |
| ESCC-D20 | exonic          | FAT1                                 | frameshift deletion    | NM_005245:c.1052_1053del;p.251_351del       | chr4  | 187629929 | 187629930 | TT  | - |
| ESCC-D20 | exonic          | CEP95                                | nonsynonymous SNV      | NM_138363:c.G1911C;p.K637N                  | chr17 | 62529303  | 62529303  | G   | C |
| ESCC-D20 | exonic          | ZC3H11A                              | nonsynonymous SNV      | NM_014827:c.G669C;p.K223N                   | chr1  | 203799300 | 203799300 | G   | C |
| ESCC-D20 | splicing        | SELENBP1(NM_003944:exon6:c.481+2T>C) |                        |                                             | chr1  | 151340673 | 151340673 | A   | G |
| ESCC-D20 | exonic          | PLSCR2                               | nonsynonymous SNV      | NM_001199979:c.C743G;p.S248C                | chr3  | 146167102 | 146167102 | G   | C |
| ESCC-D20 | exonic          | PIK3CA                               | nonsynonymous SNV      | NM_002645:c.C3523G;p.L1175V                 | chr11 | 17132000  | 17132000  | G   | C |
| ESCC-D20 | exonic          | ZNF749                               | nonsynonymous SNV      | NM_001023561:c.C2267A;p.S756Y               | chr19 | 57956783  | 57956783  | C   | A |
| ESCC-D20 | exonic          | PCDH20                               | nonsynonymous SNV      | NM_022843:c.C2205G;p.I732M                  | chr13 | 61986027  | 61986027  | G   | C |
| ESCC-D20 | exonic          | TBC1D1                               | nonsynonymous SNV      | NM_001253912:c.G64C;p.G22R                  | chr4  | 37903780  | 37903780  | G   | C |
| ESCC-D20 | exonic          | STR3                                 | nonsynonymous SNV      | NM_001083893:c.G795A;p.M265I                | chr14 | 31405752  | 31405752  | C   | T |
| ESCC-D20 | exonic          | ABCA13                               | nonsynonymous SNV      | NM_152701:c.G3907C;p.D1303H                 | chr7  | 48313170  | 48313170  | G   | C |
| ESCC-D20 | exonic          | LYZ                                  | nonsynonymous SNV      | NM_000239:c.C355A;p.R119S                   | chr12 | 69746053  | 69746053  | C   | A |
| ESCC-D20 | exonic          | MYH8                                 | nonsynonymous SNV      | NM_002472:c.C2585G;p.T862S                  | chr17 | 10307750  | 10307750  | G   | C |
| ESCC-D20 | exonic          | EPT1                                 | unknown                | UNKNOWN                                     | chr2  | 26611969  | 26611971  | TAA | - |
| ESCC-D20 | exonic          | C18orf63                             | nonsynonymous SNV      | NM_001174123:c.C1199T;p.S400F               | chr18 | 72020701  | 72020701  | C   | T |
| ESCC-D20 | exonic          | COPS2                                | nonsynonymous SNV      | NM_001143887:c.C1032G;p.I344M               | chr15 | 49422950  | 49422950  | G   | C |
| ESCC-D20 | exonic          | NMD3                                 | frameshift insertion   | NM_015938:c.1475_1476insT;p.D492fs          | chr3  | 160968661 | 160968661 | -   | T |
| ESCC-D20 | exonic          | PCSK5                                | nonsynonymous SNV      | NM_001190482:c.G5413C;p.D1805H              | chr9  | 78973668  | 78973668  | G   | C |
| ESCC-D20 | exonic          | PLXNA1                               | nonframeshift deletion | NM_032242:c.828_830del;p.276_277del         | chr3  | 126708264 | 126708266 | CTT | - |
| ESCC-D20 | exonic          | GRHL1                                | stopgain SNV           | NM_198182:c.C1606T;p.R536X                  | chr2  | 10136458  | 10136458  | C   | T |
| ESCC-D20 | exonic          | FLT1                                 | nonsynonymous SNV      | NM_001160030:c.C2071G;p.Q691E               | chr13 | 28959067  | 28959067  | G   | C |
| ESCC-D20 | exonic          | TTC18                                | nonsynonymous SNV      | NM_145170:c.C2990G;p.S997C                  | chr10 | 75034246  | 75034246  | G   | C |
| ESCC-D20 | exonic          | GPR98                                | nonsynonymous SNV      | NM_032119:c.G790A;p.E2664K                  | chr5  | 89992798  | 89992798  | G   | A |
| ESCC-D20 | exonic          | ZNF554                               | nonsynonymous SNV      | NM_001102651:c.C1052G;p.P351R               | chr19 | 2834285   | 2834285   | C   | G |
| ESCC-D20 | exonic          | PAPLN                                | nonsynonymous SNV      | NM_173462:c.A623G;p.N208S                   | chr14 | 73718405  | 73718405  | A   | G |
| ESCC-D20 | exonic          | PTPN13                               | nonsynonymous SNV      | NM_006264:c.C3041G;p.S1014C                 | chr4  | 87672013  | 87672013  | C   | G |
| ESCC-D20 | exonic          | TMEM2                                | nonsynonymous SNV      | NM_001135820:c.C1534A;p.H512N               | chr9  | 74345671  | 74345671  | G   | T |
| ESCC-D20 | exonic          | CREBZF                               | nonsynonymous SNV      | NM_001039618:c.C966G;p.D322E                | chr11 | 85374954  | 85374954  | G   | C |
| ESCC-D20 | exonic          | MUC5B                                | nonsynonymous SNV      | NM_002458:c.G13033A;p.V4345M                | chr11 | 1271143   | 1271143   | G   | A |
| ESCC-D20 | exonic          | MAGEC1                               | nonsynonymous SNV      | NM_005462:c.C2165T;p.S722F                  | chrX  | 140995355 | 140995355 | C   | T |
| ESCC-D20 | exonic          | IQGAP1                               | nonsynonymous SNV      | NM_003870:c.A3119G;p.Q1040R                 | chr15 | 91020911  | 91020911  | A   | G |
| ESCC-D20 | exonic          | DNMT1                                | nonframeshift deletion | NM_001379:c.2999_3001del;p.1000_1001del     | chr19 | 10254509  | 10254511  | AGA | - |
| ESCC-D20 | exonic          | OR8B8                                | nonsynonymous SNV      | NM_012378:c.T304C;p.F102L                   | chr11 | 124310678 | 124310678 | A   | G |
| ESCC-D20 | exonic          | OR52E2                               | nonsynonymous SNV      | NM_001005164:c.A953T;p.E318V                | chr11 | 5079905   | 5079905   | T   | A |
| ESCC-D20 | exonic          | FAM91A1                              | nonsynonymous SNV      | NM_144963:c.G94A;p.E32K                     | chr8  | 124786341 | 124786341 | G   | A |
| ESCC-D20 | exonic          | TIN                                  | frameshift deletion    | NM_003319:c.58420_58421del;p.19474_19474del | chr2  | 179425243 | 179425244 | CT  | - |
| ESCC-D20 | exonic          | SCN5A                                | nonsynonymous SNV      | NM_000335:c.G1492T;p.D498Y                  | chr3  | 38646246  | 38646246  | C   | A |
| ESCC-D20 | exonic:splicing | PAX3:PAX3                            | nonsynonymous SNV      | NM_181460:c.C1204T;p.L402F                  | chr2  | 223066131 | 223066131 | G   | A |
| ESCC-D20 | exonic          | MYT1L                                | nonsynonymous SNV      | NM_015025:c.C2399T;p.A800V                  | chr2  | 1893128   | 1893128   | G   | A |
| ESCC-D20 | exonic          | SCN5A                                | nonsynonymous SNV      | NM_000335:c.A1493T;p.D498V                  | chr3  | 38646245  | 38646245  | T   | A |
| ESCC-D20 | exonic          | PDE6C                                | nonsynonymous SNV      | NM_006204:c.G205T;p.V69L                    | chr10 | 95372687  | 95372687  | G   | T |

|          |                 |                                            |                        |                                        |  |       |           |           |      |   |
|----------|-----------------|--------------------------------------------|------------------------|----------------------------------------|--|-------|-----------|-----------|------|---|
| ESCC-D20 | exonic          | <i>CSTF2T</i>                              | nonframeshift deletion | NM_015235:c.292_294del:p.98_98del      |  | chr10 | 53459016  | 53459018  | CTT  | - |
| ESCC-D20 | exonic          | <i>KLHL20</i>                              | nonframeshift deletion | NM_014458:c.1374_1376del:p.458_459del  |  | chr1  | 173743522 | 173743524 | AGG  | - |
| ESCC-D20 | exonic          | <i>ZNF160</i>                              | nonsynonymous SNV      | NM_033288:c.A848G:p.K283R              |  | chr19 | 53572939  | 53572939  | T    | C |
| ESCC-D20 | exonic          | <i>ENOX2</i>                               | nonsynonymous SNV      | NM_006375:c.G1178A:p.R393H             |  | chrX  | 129771336 | 129771336 | C    | T |
| ESCC-D20 | exonic          | <i>ADCY10</i>                              | nonsynonymous SNV      | NM_001167749:c.T524G:p.F175C           |  | chr1  | 167852712 | 167852712 | A    | C |
| ESCC-D20 | exonic          | <i>UNC79</i>                               | nonsynonymous SNV      | NM_020818:c.C1267G:p.L423V             |  | chr14 | 94038282  | 94038282  | C    | G |
| ESCC-D20 | splicing        | <i>FRG1(NM_004477:exon5:c.432+1G&gt;C)</i> |                        |                                        |  | chr4  | 190876307 | 190876307 | G    | C |
| ESCC-D20 | exonic          | <i>CCDC93</i>                              | nonsynonymous SNV      | NM_019044:c.G1758A:p.M586I             |  | chr2  | 118688697 | 118688697 | C    | T |
| ESCC-D20 | exonic          | <i>ZBBX</i>                                | nonframeshift deletion | NM_001199201:c.453_455del:p.151_152del |  | chr3  | 167068281 | 167068283 | TCT  | - |
| ESCC-D20 | exonic          | <i>PPFIA1</i>                              | nonsynonymous SNV      | NM_003626:c.A1066G:p.M356V             |  | chr11 | 70176414  | 70176414  | A    | G |
| ESCC-D20 | exonic          | <i>AKAP9</i>                               | nonsynonymous SNV      | NM_005751:c.G1031T:p.G3438V            |  | chr7  | 91726586  | 91726586  | G    | T |
| ESCC-D20 | exonic          | <i>IFLTD1</i>                              | nonsynonymous SNV      | NM_001145727:c.G647A:p.R216Q           |  | chr12 | 25672909  | 25672909  | C    | T |
| ESCC-D20 | exonic          | <i>ZNF165</i>                              | nonsynonymous SNV      | NM_003447:c.G607C:p.E203Q              |  | chr6  | 28056397  | 28056397  | G    | C |
| ESCC-D20 | exonic          | <i>PIGK</i>                                | stopgain SNV           | NM_005482:c.T276A:p.C92X               |  | chr1  | 77635044  | 77635044  | A    | T |
| ESCC-D20 | exonic          | <i>RNF216</i>                              | frameshift deletion    | NM_207111:c.1820_1821del:p.607_607del  |  | chr7  | 5754696   | 5754697   | AA   | - |
| ESCC-D20 | exonic          | <i>C2orf55</i>                             | nonsynonymous SNV      | NM_207362:c.G35A:p.R12Q                |  | chr2  | 99463229  | 99463229  | C    | T |
| ESCC-D20 | exonic;splicing | <i>EMR3;EMR3</i>                           | stopgain SNV           | NM_032571:c.C1483T:p.R495X             |  | chr19 | 14748918  | 14748918  | G    | A |
| ESCC-D20 | exonic          | <i>PITRM1</i>                              | nonsynonymous SNV      | NM_001242309:c.G928A:p.E310K           |  | chr10 | 3201218   | 3201218   | C    | T |
| ESCC-D20 | exonic          | <i>SLCA1</i>                               | stopgain SNV           | NM_001112801:c.G2755T:p.E919X          |  | chr2  | 40342521  | 40342521  | C    | A |
| ESCC-D20 | exonic          | <i>TMEM104</i>                             | nonsynonymous SNV      | NM_017728:c.C1481G:p.T494S             |  | chr17 | 72832816  | 72832816  | C    | G |
| ESCC-D20 | exonic          | <i>CSMD3</i>                               | nonsynonymous SNV      | NM_052900:c.G9706A:p.E3236K            |  | chr8  | 113259258 | 113259258 | C    | T |
| ESCC-D20 | exonic          | <i>OR4D6</i>                               | nonsynonymous SNV      | NM_001004708:c.C850A:p.P284T           |  | chr11 | 59225283  | 59225283  | C    | A |
| ESCC-D20 | exonic          | <i>SENP3</i>                               | nonsynonymous SNV      | NM_015670:c.C1508T:p.A503V             |  | chr17 | 7474027   | 7474027   | C    | T |
| ESCC-D20 | exonic          | <i>FTSJ3</i>                               | nonsynonymous SNV      | NM_017647:c.C90G:p.F30L                |  | chr17 | 61904010  | 61904010  | G    | C |
| ESCC-D20 | exonic          | <i>PDE3B</i>                               | nonframeshift deletion | NM_000922:c.1992_1994del:p.664_665del  |  | chr11 | 14853221  | 14853223  | AGA  | - |
| ESCC-D20 | exonic          | <i>MARCH5</i>                              | frameshift deletion    | NM_017824:c.403_404del:p.135_135del    |  | chr10 | 94109139  | 94109140  | GA   | - |
| ESCC-D20 | exonic          | <i>ORF1</i>                                | nonsynonymous SNV      | NM_012360:c.C93A:p.F31L                |  | chr16 | 3254339   | 3254339   | C    | A |
| ESCC-D20 | exonic          | <i>CCNB1IP1</i>                            | nonsynonymous SNV      | NM_182849:c.G688C:p.D230H              |  | chr14 | 20779855  | 20779855  | C    | G |
| ESCC-D20 | exonic          | <i>C10orf71</i>                            | nonsynonymous SNV      | NM_001135196:c.C3128A:p.P1043H         |  | chr10 | 50533718  | 50533718  | C    | A |
| ESCC-D20 | exonic          | <i>GNAO1</i>                               | nonsynonymous SNV      | NM_020988:c.G694C:p.D232H              |  | chr16 | 56370743  | 56370743  | G    | C |
| ESCC-D20 | exonic          | <i>RNF175</i>                              | nonsynonymous SNV      | NM_173662:c.G521C:p.R174T              |  | chr4  | 154641445 | 154641445 | C    | G |
| ESCC-D20 | exonic          | <i>NLGN1</i>                               | nonsynonymous SNV      | NM_014932:c.C242G:p.L81R               |  | chr3  | 173322630 | 173322630 | T    | G |
| ESCC-D20 | exonic          | <i>ADH4</i>                                | nonsynonymous SNV      | NM_000670:c.G226A:p.E76K               |  | chr4  | 100062728 | 100062728 | C    | T |
| ESCC-D20 | exonic          | <i>TMEM177</i>                             | nonsynonymous SNV      | NM_001105198:c.C667G:p.L223V           |  | chr2  | 120439096 | 120439096 | C    | G |
| ESCC-D20 | exonic          | <i>SMTNL2</i>                              | nonsynonymous SNV      | NM_001114974:c.T357C:p.V186A           |  | chr17 | 4496293   | 4496293   | T    | C |
| ESCC-D20 | exonic          | <i>PCDHA2</i>                              | nonsynonymous SNV      | NM_018905:c.G199T:p.A67S               |  | chr5  | 140174748 | 140174748 | C    | T |
| ESCC-D20 | exonic          | <i>SMARCA1</i>                             | nonframeshift deletion | NM_003069:c.169_171del:p.57_57del      |  | chrX  | 128657177 | 128657179 | CTT  | - |
| ESCC-D20 | exonic          | <i>CDH23</i>                               | nonsynonymous SNV      | NM_001171933:c.G2617C:p.D873H          |  | chr10 | 73571729  | 73571729  | G    | C |
| ESCC-D20 | exonic          | <i>DDX5</i>                                | frameshift deletion    | NM_004396:c.440_441del:p.147_147del    |  | chr17 | 62500099  | 62500102  | ACAG | - |
| ESCC-D20 | exonic          | <i>IL16</i>                                | nonsynonymous SNV      | NM_004513:c.C683G:p.P228R              |  | chr15 | 81592453  | 81592453  | C    | G |
| ESCC-D20 | exonic          | <i>DDX42</i>                               | frameshift deletion    | NM_203499:c.641_642del:p.214_214del    |  | chr17 | 61882450  | 61882451  | AA   | - |
| ESCC-D20 | exonic          | <i>OR2B2</i>                               | nonsynonymous SNV      | NM_033057:c.C768G:p.I256M              |  | chr6  | 27879330  | 27879330  | G    | C |
| ESCC-D20 | exonic          | <i>PLEC</i>                                | nonsynonymous SNV      | NM_201378:c.C391G:p.Q131E              |  | chr8  | 145011149 | 145011149 | G    | C |
| ESCC-D20 | exonic          | <i>RNF213</i>                              | nonsynonymous SNV      | NM_001256071:c.A1382T:p.E461V          |  | chr17 | 78265537  | 78265537  | A    | T |
| ESCC-D20 | exonic          | <i>KLHL3</i>                               | nonsynonymous SNV      | NM_017415:c.C1733T:p.A578V             |  | chr5  | 136961444 | 136961444 | G    | A |
| ESCC-D20 | exonic          | <i>HIFOO</i>                               | nonsynonymous SNV      | NM_153833:c.G961T:p.A321S              |  | chr3  | 129270103 | 129270103 | G    | T |
| ESCC-D20 | exonic          | <i>ARHGAP31</i>                            | nonsynonymous SNV      | NM_020754:c.C3964T:p.L1322F            |  | chr3  | 119134740 | 119134740 | C    | T |
| ESCC-D20 | exonic          | <i>HHAT</i>                                | nonsynonymous SNV      | NM_001170564:c.G768C:p.W256C           |  | chr1  | 210761377 | 210761377 | G    | C |
| ESCC-D20 | exonic          | <i>CRB1</i>                                | nonsynonymous SNV      | NM_001193640:c.C3681G:p.D1227E         |  | chr1  | 197446805 | 197446805 | C    | G |
| ESCC-D20 | exonic          | <i>TRHDE</i>                               | nonsynonymous SNV      | NM_013381:c.T598C:p.F200L              |  | chr12 | 72667156  | 72667156  | T    | C |
| ESCC-D20 | exonic          | <i>HUWE1</i>                               | nonsynonymous SNV      | NM_031407:c.G9144T:p.Q3048H            |  | chrX  | 53578103  | 53578103  | C    | A |
| ESCC-D20 | exonic          | <i>SLCA8</i>                               | nonsynonymous SNV      | NM_001039960:c.A653G:p.K218R           |  | chr12 | 51851213  | 51851213  | A    | G |
| ESCC-D20 | exonic          | <i>PJA1</i>                                | stopgain SNV           | NM_001032396:c.G1014A:p.W338X          |  | chrX  | 68381903  | 68381903  | C    | T |
| ESCC-D20 | exonic          | <i>JPP</i>                                 | nonsynonymous SNV      | NM_001145349:c.G250A:p.E84K            |  | chr1  | 46211834  | 46211834  | C    | T |

|          |        |                  |                         |                                             |                            |       |           |           |      |     |
|----------|--------|------------------|-------------------------|---------------------------------------------|----------------------------|-------|-----------|-----------|------|-----|
| ESCC-D20 | exonic | <i>ENTPD4</i>    | nonsynonymous SNV       | NM_001128930:c.G1382T;p.R461L               |                            | chr8  | 23292959  | 23292959  | C    | A   |
| ESCC-D20 | exonic | <i>STK38</i>     | nonframeshift deletion  | NM_007271:c.655_657del;p.219_219del         |                            | chr6  | 36483127  | 36483129  | AAG  | -   |
| ESCC-D20 | exonic | <i>VSIG8</i>     | nonsynonymous SNV       | NM_001013661:c.A679C;p.K227Q                |                            | chr1  | 159826407 | 159826407 | T    | G   |
| ESCC-D20 | exonic | <i>SLC26A8</i>   | nonsynonymous SNV       | NM_138718:c.T1835A;p.L612Q                  |                            | chr6  | 35923011  | 35923011  | A    | T   |
| ESCC-D20 | exonic | <i>DDX1</i>      | frameshift deletion     | NM_004939:c.834_837del;p.278_279del         |                            | chr2  | 15747315  | 15747318  | ACAA | -   |
| ESCC-D20 | exonic | <i>PWIL3</i>     | nonsynonymous SNV       | NM_001008496:c.A65G;p.E22G                  |                            | chr22 | 25158402  | 25158402  | T    | C   |
| ESCC-D20 | exonic | <i>GIMAP4</i>    | nonsynonymous SNV       | NM_018326:c.T362C;p.V121A                   |                            | chr7  | 150269520 | 150269520 | T    | C   |
| ESCC-D20 | exonic | <i>THOC1</i>     | nonsynonymous SNV       | NM_005131:c.G99T;p.L33F                     |                            | chr18 | 265486    | 265486    | C    | A   |
| ESCC-D20 | exonic | <i>ZNF229</i>    | nonsynonymous SNV       | NM_014518:c.C880G;p.Q294E                   |                            | chr19 | 44934076  | 44934076  | G    | C   |
| ESCC-D20 | exonic | <i>RARGAP1L</i>  | stopgain SNV            | NM_014857:c.C1821A;p.C607X                  |                            | chr1  | 174606623 | 174606623 | C    | A   |
| ESCC-D20 | exonic | <i>NCKAP1</i>    | nonsynonymous SNV       | NM_013436:c.T3095C;p.L1032S                 |                            | chr2  | 183792930 | 183792930 | A    | G   |
| ESCC-D20 | exonic | <i>ZNF500</i>    | nonsynonymous SNV       | NM_021646:c.C701T;p.S234F                   |                            | chr16 | 4810552   | 4810552   | G    | A   |
| ESCC-D20 | exonic | <i>ARHGFE17</i>  | frameshift deletion     | NM_014786:c.1844delC;p.A615fs               |                            | chr11 | 73021527  | 73021527  | C    | -   |
| ESCC-D20 | exonic | <i>RPLP0</i>     | frameshift deletion     | NM_001002:c.244_245del;p.82_82del           |                            | chr12 | 120636994 | 120636995 | AT   | -   |
| ESCC-D20 | exonic | <i>ARHGAP31</i>  | frameshift insertion    | NM_020754:c.3961_3962insT;p.L1321fs         |                            | chr3  | 119134737 | 119134737 | -    | T   |
| ESCC-D20 | exonic | <i>URB1</i>      | nonsynonymous SNV       | NM_014825:c.G5814C;p.Q1938H                 |                            | chr21 | 33690207  | 33690207  | C    | G   |
| ESCC-D20 | exonic | <i>NUFIP2</i>    | frameshift deletion     | NM_020772:c.1925_1926del;p.642_642del       |                            | chr17 | 27613086  | 27613087  | TC   | -   |
| ESCC-D20 | exonic | <i>PGM2L1</i>    | nonsynonymous SNV       | NM_173582:c.G1099C;p.D367H                  |                            | chr11 | 74056633  | 74056633  | C    | G   |
| ESCC-D20 | exonic | <i>ZFP62</i>     | stopgain SNV            | NM_001172638:c.G2260T;p.E754X               |                            | chr5  | 180276235 | 180276235 | C    | A   |
| ESCC-D20 | exonic | <i>LAMB2</i>     | nonsynonymous SNV       | NM_002292:c.C1992G;p.I664M                  |                            | chr3  | 49165917  | 49165917  | G    | C   |
| ESCC-D20 | exonic | <i>RAP1B</i>     | nonsynonymous SNV       | NM_001010942:c.G5T;p.R2L                    |                            | chr12 | 69042509  | 69042509  | G    | T   |
| ESCC-D20 | exonic | <i>EPHB6</i>     | nonsynonymous SNV       | NM_004445:c.G1193C;p.R398P                  |                            | chr7  | 142563805 | 142563805 | G    | C   |
| ESCC-D20 | exonic | <i>B3GAT2</i>    | nonsynonymous SNV       | NM_080742:c.C935A;p.P312Q                   |                            | chr6  | 71571403  | 71571403  | G    | T   |
| ESCC-D20 | exonic | <i>HAPLN1</i>    | nonframeshift deletion  | NM_001884:c.18_20del;p.6_7del               |                            | chr5  | 82969323  | 82969325  | AGA  | -   |
| ESCC-D20 | exonic | <i>NFE2L3</i>    | nonsynonymous SNV       | NM_004289:c.C780G;p.F260L                   |                            | chr7  | 26223350  | 26223350  | C    | G   |
| ESCC-D20 | exonic | <i>KDM6A</i>     | nonframeshift insertion | NM_021140:c.3726_3727insCCA;p.G1242delinsGP |                            | chrX  | 44949165  | 44949165  | -    | CCA |
| ESCC-D20 | exonic | <i>ME3</i>       | nonsynonymous SNV       | NM_001014811:c.G421A;p.V141M                |                            | chr11 | 86267641  | 86267641  | C    | T   |
| ESCC-D20 | exonic | <i>PCDH10</i>    | nonframeshift deletion  | NM_020815:c.2228_2230del;p.743_744del       |                            | chr4  | 134073523 | 134073525 | AGA  | -   |
| ESCC-D20 | exonic | <i>MTERFD1</i>   | frameshift deletion     | NM_015942:c.466_467del;p.156_156del         |                            | chr8  | 97269210  | 97269211  | AG   | -   |
| ESCC-D20 | exonic | <i>TEK4</i>      | nonsynonymous SNV       | NM_144705:c.A1226G;p.N409S                  |                            | chr2  | 95542432  | 95542432  | A    | G   |
| ESCC-D20 | exonic | <i>PLEKHA3</i>   | nonsynonymous SNV       | NM_019099:c.T466G;p.S156A                   |                            | chr2  | 179360238 | 179360238 | T    | G   |
| ESCC-D20 | exonic | <i>ALPK3</i>     | nonsynonymous SNV       | NM_020778:c.C558T;p.L1863F                  |                            | chr15 | 85411550  | 85411550  | C    | T   |
| ESCC-D20 | exonic | <i>SSFA2</i>     | nonsynonymous SNV       | NM_001130445:c.G1504T;p.A502S               |                            | chr2  | 182778589 | 182778589 | G    | T   |
| ESCC-D20 | exonic | <i>VRK3</i>      | nonsynonymous SNV       | NM_001025778:c.C231G;p.S77R                 |                            | chr19 | 50510992  | 50510992  | G    | C   |
| ESCC-D20 | exonic | <i>TBRG1</i>     | nonframeshift deletion  | NM_032811:c.216_218del;p.72_73del           |                            | chr11 | 124494892 | 124494894 | AAG  | -   |
| ESCC-D21 | exonic | <i>JAGN1</i>     | stopgain SNV            | NM_032492:c.C217T;p.Q73X                    |                            | chr3  | 9934726   | 9934726   | C    | T   |
| ESCC-D21 | exonic | <i>RCOR3</i>     | nonsynonymous SNV       | NM_018254:c.C1469T;p.S490L                  |                            | chr1  | 211487091 | 211487091 | C    | T   |
| ESCC-D21 | exonic | <i>PKN3</i>      | nonsynonymous SNV       | NM_013355:c.G2486A;p.R829H                  |                            | chr9  | 131482701 | 131482701 | G    | A   |
| ESCC-D21 | exonic | <i>C9orf84</i>   | stopgain SNV            | NM_001080551:c.C2068T;p.Q690X               |                            | chr9  | 114476763 | 114476763 | G    | A   |
| ESCC-D21 | exonic | <i>RBM12B</i>    | nonsynonymous SNV       | NM_203390:c.A149T;p.D50V                    |                            | chr8  | 94748490  | 94748490  | T    | A   |
| ESCC-D21 | exonic | <i>ADCY8</i>     | nonsynonymous SNV       | NM_001115:c.G2128A;p.E710K                  |                            | chr8  | 131880174 | 131880174 | C    | T   |
| ESCC-D21 | exonic | <i>KLHDC7A</i>   | nonsynonymous SNV       | NM_152375:c.C272G;p.A91G                    |                            | chr1  | 18807747  | 18807747  | C    | G   |
| ESCC-D21 | exonic | <i>CLN8</i>      | nonsynonymous SNV       | NM_018941:c.G349A;p.E117K                   |                            | chr8  | 1719569   | 1719569   | G    | A   |
| ESCC-D21 | exonic | <i>NBEA</i>      | nonsynonymous SNV       | NM_001204197:c.C1073T;p.S358F               |                            | chr13 | 36220472  | 36220472  | C    | T   |
| ESCC-D21 | exonic | <i>GPBAR1</i>    | nonsynonymous SNV       | NM_001077191:c.C373T;p.R125W                |                            | chr2  | 219127820 | 219127820 | C    | T   |
| ESCC-D21 | exonic | <i>LOC643802</i> | nonsynonymous SNV       | NM_001207030:c.G19C;p.E7Q                   |                            | chr16 | 53404883  | 53404883  | C    | G   |
| ESCC-D21 | exonic | <i>SEC62</i>     | nonsynonymous SNV       | NM_003262:c.C830T;p.S277F                   |                            | chr3  | 169710481 | 169710481 | C    | T   |
| ESCC-D21 | exonic | <i>LBX1</i>      | nonsynonymous SNV       | NM_006562:c.G532A;p.A178T                   |                            | chr10 | 102987341 | 102987341 | C    | T   |
| ESCC-D21 | exonic | <i>GPR124</i>    | nonsynonymous SNV       | NM_032777:c.A2074G;p.T692A                  |                            | chr8  | 37695272  | 37695272  | A    | G   |
| ESCC-D21 | exonic | <i>MAGEC1</i>    | nonsynonymous SNV       | NM_005462:c.G3283A;p.V1095I                 |                            | chrX  | 140996473 | 140996473 | G    | A   |
| ESCC-D21 | exonic | <i>ANKRD50</i>   | nonsynonymous SNV       | NM_001167882:c.C2647G;p.Q883E               |                            | chr4  | 125591248 | 125591248 | G    | C   |
| ESCC-D21 | exonic | <i>HPS5</i>      | nonsynonymous SNV       | NM_007216:c.C2008T;p.L670F                  |                            | chr11 | 18313079  | 18313079  | G    | A   |
| ESCC-D21 | exonic | <i>TP53</i>      | stopgain SNV            | NM_001126115:c.C97T;p.Q33X                  | 724855;905938;907276;90970 | chr17 | 7578437   | 7578437   | G    | A   |
| ESCC-D21 | exonic | <i>SLC39A13</i>  | nonsynonymous SNV       | NM_001128225:c.C931T;p.P311S                |                            | chr11 | 47436601  | 47436601  | C    | T   |

|          |                 |                                              |                     |                                          |         |       |           |           |    |   |
|----------|-----------------|----------------------------------------------|---------------------|------------------------------------------|---------|-------|-----------|-----------|----|---|
| ESCC-D21 | exonic          | <i>MLLT10</i>                                | stopgain SNV        | NM_001195626:c.1969T:p.Q657X             |         | chr10 | 22015263  | 22015263  | C  | T |
| ESCC-D21 | exonic          | <i>TIPARP</i>                                | nonsynonymous SNV   | NM_001184717:c.G1622A:p.G541E            |         | chr3  | 156422568 | 156422568 | G  | A |
| ESCC-D21 | exonic:splicing | <i>OBSCN;OBSCN</i>                           | nonsynonymous SNV   | NM_001098623:c.C18937T:p.R6313W          |         | chr1  | 228552777 | 228552777 | C  | T |
| ESCC-D21 | exonic          | <i>GK2</i>                                   | nonsynonymous SNV   | NM_033214:c.C761G:p.S254C                |         | chr4  | 80328594  | 80328594  | G  | C |
| ESCC-D21 | exonic          | <i>TIPARP</i>                                | nonsynonymous SNV   | NM_001184717:c.G1597A:p.G533R            |         | chr3  | 156422543 | 156422543 | G  | A |
| ESCC-D21 | exonic          | <i>TIPARP</i>                                | nonsynonymous SNV   | NM_001184717:c.G1598A:p.G533E            |         | chr3  | 156422544 | 156422544 | G  | A |
| ESCC-D21 | exonic          | <i>SYNE1</i>                                 | nonsynonymous SNV   | NM_033071:c.G22213A:p.E7405K             |         | chr6  | 152534815 | 152534815 | C  | T |
| ESCC-D21 | exonic          | <i>NLRCA</i>                                 | nonsynonymous SNV   | NM_001199138:c.G723C:p.Q241H             | 1280820 | chr2  | 32476210  | 32476210  | C  | G |
| ESCC-D21 | exonic          | <i>VCFIP1</i>                                | nonsynonymous SNV   | NM_025054:c.G692C:p.R231P                |         | chr8  | 67578502  | 67578502  | C  | G |
| ESCC-D21 | exonic          | <i>ZC3H14</i>                                | nonsynonymous SNV   | NM_001160103:c.C724T:p.H242Y             |         | chr14 | 89039214  | 89039214  | C  | T |
| ESCC-D21 | exonic          | <i>GABRG2</i>                                | nonsynonymous SNV   | NM_000816:c.T656C:p.V219A                | 1604868 | chr5  | 161530919 | 161530919 | T  | C |
| ESCC-D21 | exonic          | <i>FAT2</i>                                  | nonsynonymous SNV   | NM_001447:c.C8066A:p.P2689Q              |         | chr5  | 150922622 | 150922622 | G  | T |
| ESCC-D21 | exonic          | <i>ADAMTSL4</i>                              | nonsynonymous SNV   | NM_019032:c.G1957A:p.A653T               |         | chr1  | 150529721 | 150529721 | G  | A |
| ESCC-D21 | exonic          | <i>MGAT9C</i>                                | nonsynonymous SNV   | NM_013244:c.C1260A:p.S420R               |         | chr12 | 86373244  | 86373244  | G  | T |
| ESCC-D21 | exonic          | <i>KIAA0947</i>                              | nonsynonymous SNV   | NM_015325:c.G4671C:p.K1557N              |         | chr5  | 5464118   | 5464118   | G  | C |
| ESCC-D21 | exonic          | <i>PAMR1</i>                                 | nonsynonymous SNV   | NM_001001991:c.T358A:p.W120R             |         | chr11 | 35513614  | 35513614  | A  | T |
| ESCC-D21 | exonic          | <i>VPS13B</i>                                | stopgain SNV        | NM_015243:c.C1550G:p.S517X               |         | chr8  | 100147948 | 100147948 | C  | G |
| ESCC-D21 | exonic          | <i>PAN2</i>                                  | stopgain SNV        | NM_001127460:c.G3547T:p.E1183X           |         | chr12 | 56712048  | 56712048  | C  | A |
| ESCC-D21 | exonic          | <i>PTGER1</i>                                | nonsynonymous SNV   | NM_000955:c.C825G:p.F275L                |         | chr19 | 14584308  | 14584308  | G  | C |
| ESCC-D21 | exonic          | <i>APOA5</i>                                 | nonsynonymous SNV   | NM_001166598:c.C697T:p.R233W             |         | chr11 | 116661248 | 116661248 | G  | A |
| ESCC-D21 | exonic          | <i>SCG2</i>                                  | nonsynonymous SNV   | NM_003469:c.C1641G:p.I547M               |         | chr2  | 224462360 | 224462360 | G  | C |
| ESCC-D21 | exonic          | <i>TEAD4</i>                                 | stopgain SNV        | NM_201443:c.C157T:p.Q53X                 |         | chr12 | 3128297   | 3128297   | C  | T |
| ESCC-D21 | exonic          | <i>GRAM1</i>                                 | nonsynonymous SNV   | NM_000838:c.G2384A:p.C795Y               |         | chr6  | 146720559 | 146720559 | G  | A |
| ESCC-D21 | exonic          | <i>JTGAL</i>                                 | stopgain SNV        | NM_001114380:c.C1027T:p.R343X            |         | chr16 | 30505595  | 30505595  | C  | T |
| ESCC-D21 | exonic          | <i>ZNF799</i>                                | frameshift deletion | NM_001080821:c.1094_1095del:p.365_365del |         | chr19 | 12502117  | 12502118  | AT | - |
| ESCC-D21 | exonic          | <i>FSIP2</i>                                 | stopgain SNV        | NM_173651:c.C15239G:p.S5080X             |         | chr2  | 186669005 | 186669005 | C  | G |
| ESCC-D21 | exonic          | <i>ANAPC5</i>                                | nonsynonymous SNV   | NM_001137559:c.C1345T:p.H449Y            |         | chr12 | 121756368 | 121756368 | G  | A |
| ESCC-D21 | exonic          | <i>OR7A10</i>                                | nonsynonymous SNV   | NM_001005190:c.G142T:p.A48S              |         | chr19 | 14952548  | 14952548  | C  | A |
| ESCC-D21 | exonic          | <i>GBX2</i>                                  | nonsynonymous SNV   | NM_001485:c.G893A:p.R298Q                |         | chr2  | 237074711 | 237074711 | C  | T |
| ESCC-D21 | exonic          | <i>ATAD2</i>                                 | nonsynonymous SNV   | NM_014109:c.A3414T:p.R1138S              |         | chr8  | 124346182 | 124346182 | T  | A |
| ESCC-D21 | exonic          | <i>TPR</i>                                   | nonsynonymous SNV   | NM_003292:c.G5620A:p.E1874K              |         | chr1  | 186300698 | 186300698 | C  | T |
| ESCC-D21 | exonic          | <i>LRRN2</i>                                 | nonsynonymous SNV   | NM_201630:c.G326A:p.R109Q                |         | chr1  | 204588795 | 204588795 | C  | T |
| ESCC-D21 | exonic          | <i>TLL12</i>                                 | nonsynonymous SNV   | NM_015140:c.G525C:p.Q175H                |         | chr22 | 43576769  | 43576769  | C  | G |
| ESCC-D21 | exonic          | <i>GRIK2</i>                                 | nonsynonymous SNV   | NM_001166247:c.C2305A:p.P769T            |         | chr6  | 102483435 | 102483435 | C  | A |
| ESCC-D21 | exonic          | <i>MGAT5</i>                                 | nonsynonymous SNV   | NM_002410:c.T1107G:p.H369Q               |         | chr2  | 135102630 | 135102630 | T  | G |
| ESCC-D21 | exonic          | <i>FCHSD2</i>                                | stopgain SNV        | NM_014824:c.C4T:p.Q2X                    |         | chr11 | 72852919  | 72852919  | G  | A |
| ESCC-D21 | exonic          | <i>ZDHHC22</i>                               | nonsynonymous SNV   | NM_174976:c.C703G:p.Q235E                |         | chr14 | 77600115  | 77600115  | G  | C |
| ESCC-D21 | exonic          | <i>EFEMP2</i>                                | nonsynonymous SNV   | NM_016938:c.G1228C:p.E410Q               |         | chr11 | 65634493  | 65634493  | C  | G |
| ESCC-D21 | exonic          | <i>ZSCAN18</i>                               | nonsynonymous SNV   | NM_001145544:c.C624G:p.D208E             |         | chr19 | 58596553  | 58596553  | G  | C |
| ESCC-D21 | exonic          | <i>SNX32</i>                                 | nonsynonymous SNV   | NM_152760:c.C1039T:p.R347C               |         | chr11 | 65620227  | 65620227  | C  | T |
| ESCC-D21 | exonic          | <i>HTR1B</i>                                 | nonsynonymous SNV   | NM_000863:c.C626T:p.T209M                |         | chr6  | 78172495  | 78172495  | G  | A |
| ESCC-D21 | exonic          | <i>FAM55A</i>                                | nonsynonymous SNV   | NM_152315:c.G451A:p.D151N                |         | chr11 | 114398580 | 114398580 | C  | T |
| ESCC-D21 | exonic          | <i>CTC1</i>                                  | nonsynonymous SNV   | NM_025099:c.G1187A:p.R396Q               |         | chr17 | 8139168   | 8139168   | C  | T |
| ESCC-D21 | exonic          | <i>WWC3</i>                                  | nonsynonymous SNV   | NM_015691:c.G2118C:p.Q706H               |         | chrX  | 10096039  | 10096039  | G  | C |
| ESCC-D21 | exonic          | <i>ZNF215</i>                                | stopgain SNV        | NM_013250:c.C740A:p.S247X                |         | chr11 | 6976948   | 6976948   | C  | A |
| ESCC-D21 | splicing        | <i>BAP1(NM_004656:exon15:c.1730-1G&gt;A)</i> |                     |                                          |         | chr3  | 52437315  | 52437315  | C  | T |
| ESCC-D21 | exonic          | <i>SPTLC2</i>                                | nonsynonymous SNV   | NM_004863:c.G661C:p.E221Q                |         | chr14 | 78036822  | 78036822  | C  | G |
| ESCC-D21 | exonic          | <i>CXCR1</i>                                 | nonsynonymous SNV   | NM_000634:c.G352A:p.E118K                |         | chr2  | 219029583 | 219029583 | C  | T |
| ESCC-D21 | exonic          | <i>QRS1</i>                                  | nonsynonymous SNV   | NM_018292:c.G253A:p.E85K                 |         | chr6  | 107088766 | 107088766 | G  | A |
| ESCC-D21 | exonic          | <i>SRCAP</i>                                 | nonsynonymous SNV   | NM_006662:c.C9248A:p.G3083E              |         | chr16 | 30750609  | 30750609  | G  | A |
| ESCC-D21 | exonic          | <i>PRRC2A</i>                                | stopgain SNV        | NM_004638:c.C5566T:p.Q1856X              |         | chr6  | 31603768  | 31603768  | C  | T |
| ESCC-D21 | exonic          | <i>RPS6KA6</i>                               | nonsynonymous SNV   | NM_014496:c.C1831A:p.L611I               |         | chrX  | 83352802  | 83352802  | G  | T |
| ESCC-D21 | exonic:splicing | <i>VWC2L;VWC2L</i>                           | nonsynonymous SNV   | NM_001080500:c.G521A:p.G174D             |         | chr2  | 215440396 | 215440396 | G  | A |
| ESCC-D21 | exonic          | <i>RG520</i>                                 | nonsynonymous SNV   | NM_003702:c.G586C:p.E196Q                |         | chr8  | 54870878  | 54870878  | G  | C |

|          |        |               |                     |                                |  |       |           |           |   |   |
|----------|--------|---------------|---------------------|--------------------------------|--|-------|-----------|-----------|---|---|
| ESCC-D21 | exonic | <i>RECQL</i>  | stopgain SNV        | NM_002907:c.C286T;p.Q96X       |  | chr12 | 21643241  | 21643241  | G | A |
| ESCC-D21 | exonic | <i>CCDC50</i> | nonsynonymous SNV   | NM_178335:c.A764G;p.E255G      |  | chr3  | 191093166 | 191093166 | A | G |
| ESCC-D21 | exonic | <i>MCC</i>    | nonsynonymous SNV   | NM_002387:c.G773A;p.R258Q      |  | chr5  | 112437491 | 112437491 | C | T |
| ESCC-D21 | exonic | <i>FZD10</i>  | nonsynonymous SNV   | NM_007197:c.G1634A;p.R545K     |  | chr12 | 130649121 | 130649121 | G | A |
| ESCC-D21 | exonic | <i>TACC2</i>  | nonsynonymous SNV   | NM_206862:c.G3745C;p.E1249Q    |  | chr10 | 123845760 | 123845760 | G | C |
| ESCC-D21 | exonic | <i>KCNH4</i>  | nonsynonymous SNV   | NM_012285:c.G355C;p.E119Q      |  | chr17 | 40330451  | 40330451  | C | G |
| ESCC-D21 | exonic | <i>EPHA4</i>  | nonsynonymous SNV   | NM_004438:c.G180A;p.M60I       |  | chr2  | 222429094 | 222429094 | C | T |
| ESCC-D21 | exonic | <i>MMRN1</i>  | nonsynonymous SNV   | NM_007351:c.A3349C;p.I1117L    |  | chr4  | 90874231  | 90874231  | A | C |
| ESCC-D21 | exonic | <i>CA2</i>    | nonsynonymous SNV   | NM_000067:c.G709A;p.E237K      |  | chr8  | 86392944  | 86392944  | G | A |
| ESCC-D21 | exonic | <i>UNC80</i>  | nonsynonymous SNV   | NM_032504:c.G4591T;p.D1531Y    |  | chr2  | 210777290 | 210777290 | G | T |
| ESCC-D21 | exonic | <i>KDM2B</i>  | nonsynonymous SNV   | NM_001005366:c.T3019C;p.Y1007H |  | chr12 | 121880018 | 121880018 | A | G |
| ESCC-D21 | exonic | <i>SMYD4</i>  | nonsynonymous SNV   | NM_052928:c.G2054A;p.R685H     |  | chr17 | 1686737   | 1686737   | C | T |
| ESCC-D21 | exonic | <i>OTOGL</i>  | nonsynonymous SNV   | NM_173591:c.G5110C;p.E1704Q    |  | chr12 | 80735814  | 80735814  | G | C |
| ESCC-D21 | exonic | <i>SBK2</i>   | nonsynonymous SNV   | NM_001101401:c.G706A;p.E236K   |  | chr19 | 56041441  | 56041441  | C | T |
| ESCC-D21 | exonic | <i>XRN2</i>   | nonsynonymous SNV   | NM_012255:c.G2284A;p.E762K     |  | chr20 | 21346087  | 21346087  | G | A |
| ESCC-D21 | exonic | <i>SRD5A2</i> | unknown             | UNKNOWN                        |  | chr2  | 31805880  | 31805880  | A | G |
| ESCC-D21 | exonic | <i>MLL2</i>   | frameshift deletion | NM_003482:c.5485delA;p.I1829fs |  | chr12 | 49437194  | 49437194  | T | - |
| ESCC-D21 | exonic | <i>DHX33</i>  | nonsynonymous SNV   | NM_020162:c.C316G;p.Q106E      |  | chr17 | 5366983   | 5366983   | G | C |
| ESCC-D21 | exonic | <i>TIPARP</i> | stoploss SNV        | NM_001184717:c.G1973C;p.X658S  |  | chr3  | 156422919 | 156422919 | G | C |
| ESCC-D21 | exonic | <i>MED13L</i> | nonsynonymous SNV   | NM_015335:c.G4211C;p.W1404S    |  | chr12 | 116424198 | 116424198 | C | G |

| Color types                                                                                            | Number       |
|--------------------------------------------------------------------------------------------------------|--------------|
| Validated as a true call by Sanger sequencing                                                          | 337          |
| Germline SNP                                                                                           | 7            |
| Validated as a false call by Sanger sequencing                                                         | 18           |
| <b>Total Sanger events</b>                                                                             | <b>362</b>   |
| <b>True positive rate</b>                                                                              | <b>93.1%</b> |
| PCR failure due to: high GC content; difficulty in designing primers; poor signal of Sanger sequencing | 82           |

**Supplementary Table 4. FKPM value determined by RNA-seq of all the mutated genes in 4 ESCCs from Discovery cohort**

| Patient ID | Gene    | FKPM value | Detectable transcripts |
|------------|---------|------------|------------------------|
| ESCC-D1    | NFIB    | 47         | Yes                    |
| ESCC-D1    | ANKIB1  | 24         | Yes                    |
| ESCC-D1    | CTLA4   | 23         | Yes                    |
| ESCC-D1    | AMOTL1  | 20         | Yes                    |
| ESCC-D1    | NBPF14  | 18         | Yes                    |
| ESCC-D1    | MLL3    | 14         | Yes                    |
| ESCC-D1    | FRG1    | 10         | Yes                    |
| ESCC-D1    | KIF13A  | 8          | Yes                    |
| ESCC-D1    | N4BP2   | 8          | Yes                    |
| ESCC-D1    | EPAS1   | 6          | Yes                    |
| ESCC-D1    | BCL9    | 5          | Yes                    |
| ESCC-D1    | PPP1R10 | 5          | Yes                    |
| ESCC-D1    | POLQ    | 4          | Yes                    |
| ESCC-D1    | ZNF480  | 4          | Yes                    |
| ESCC-D1    | JARID2  | 4          | Yes                    |
| ESCC-D1    | CEP89   | 3          | Yes                    |
| ESCC-D1    | MYBPC1  | 3          | Yes                    |
| ESCC-D1    | ZNF714  | 2          | Yes                    |
| ESCC-D1    | RASGRP3 | 1          | Yes                    |
| ESCC-D1    | MAPK11  | 1          | Yes                    |
| ESCC-D1    | ZNF221  | 1          | Yes                    |
| ESCC-D1    | DNAH10  | 0          | No                     |
| ESCC-D1    | SLCO5A1 | 0          | No                     |
| ESCC-D1    | TMEM232 | 0          | No                     |
| ESCC-D1    | CLCN4   | 0          | No                     |
| ESCC-D1    | GRM3    | 0          | No                     |
| ESCC-D1    | USH2A   | 0          | No                     |
| ESCC-D1    | SLC25A2 | 0          | No                     |
| ESCC-D1    | PCDH9   | 0          | No                     |
| ESCC-D1    | LRRC4C  | 0          | No                     |
| ESCC-D1    | WDR87   | 0          | No                     |
| ESCC-D1    | OR5K3   | 0          | No                     |
| ESCC-D1    | KANSL1L | 0          | No                     |
| ESCC-D1    | LRRTM3  | NA         | No                     |
| ESCC-D1    | KRT33A  | NA         | No                     |
| ESCC-D2    | CAP1    | 86         | Yes                    |
| ESCC-D2    | MRPL40  | 56         | Yes                    |
| ESCC-D2    | DDX42   | 39         | Yes                    |
| ESCC-D2    | WDR26   | 27         | Yes                    |
| ESCC-D2    | PAM     | 26         | Yes                    |
| ESCC-D2    | FAM122B | 26         | Yes                    |
| ESCC-D2    | DHRS1   | 24         | Yes                    |
| ESCC-D2    | ANKRD12 | 20         | Yes                    |
| ESCC-D2    | TOX4    | 18         | Yes                    |
| ESCC-D2    | CRNKL1  | 18         | Yes                    |
| ESCC-D2    | ERAL1   | 16         | Yes                    |
| ESCC-D2    | NSMCE2  | 16         | Yes                    |
| ESCC-D2    | RICTOR  | 14         | Yes                    |
| ESCC-D2    | EFEMP1  | 14         | Yes                    |
| ESCC-D2    | SPAST   | 12         | Yes                    |
| ESCC-D2    | FBXO28  | 12         | Yes                    |
| ESCC-D2    | FEZ1    | 10         | Yes                    |
| ESCC-D2    | MTMR4   | 9          | Yes                    |
| ESCC-D2    | ZMYM1   | 9          | Yes                    |
| ESCC-D2    | BDP1    | 9          | Yes                    |
| ESCC-D2    | KIF4A   | 8          | Yes                    |
| ESCC-D2    | USP18   | 8          | Yes                    |
| ESCC-D2    | HELZ    | 7          | Yes                    |
| ESCC-D2    | CEP350  | 7          | Yes                    |
| ESCC-D2    | SMG5    | 7          | Yes                    |
| ESCC-D2    | MLL2    | 3          | Yes                    |
| ESCC-D2    | OSCP1   | 3          | Yes                    |
| ESCC-D2    | L3MBTL3 | 2          | Yes                    |
| ESCC-D2    | PHTF1   | 2          | Yes                    |
| ESCC-D2    | LRRC15  | 2          | Yes                    |
| ESCC-D2    | ZNF34   | 2          | Yes                    |

|         |           |     |     |
|---------|-----------|-----|-----|
| ESCC-D2 | ILIF10    | 2   | Yes |
| ESCC-D2 | MUC16     | 1   | Yes |
| ESCC-D2 | CNNM2     | 1   | Yes |
| ESCC-D2 | DNAH5     | 0   | No  |
| ESCC-D2 | FAM5C     | 0   | No  |
| ESCC-D2 | FAR2      | 0   | No  |
| ESCC-D2 | ABCB1     | 0   | No  |
| ESCC-D2 | NBEA      | 0   | No  |
| ESCC-D2 | PIK3CG    | 0   | No  |
| ESCC-D2 | TLR7      | 0   | No  |
| ESCC-D2 | FAM184A   | 0   | No  |
| ESCC-D2 | UNC93A    | 0   | No  |
| ESCC-D2 | CMYA5     | 0   | No  |
| ESCC-D2 | ARL13A    | 0   | No  |
| ESCC-D2 | THSD7A    | 0   | No  |
| ESCC-D2 | DPCR1     | 0   | No  |
| ESCC-D2 | SI        | 0   | No  |
| ESCC-D2 | MLPH      | 0   | No  |
| ESCC-D2 | GRIN3A    | 0   | No  |
| ESCC-D2 | DNAH8     | 0   | No  |
| ESCC-D2 | CNTN5     | 0   | No  |
| ESCC-D2 | ZNF831    | 0   | No  |
| ESCC-D2 | PCDHA10   | 0   | No  |
| ESCC-D2 | C7        | 0   | No  |
| ESCC-D2 | FAXC      | 0   | No  |
| ESCC-D2 | APOA4     | 0   | No  |
| ESCC-D2 | BPIFC     | 0   | No  |
| ESCC-D2 | KLHL1     | 0   | No  |
| ESCC-D2 | GOT1L1    | 0   | No  |
| ESCC-D2 | USP26     | 0   | No  |
| ESCC-D2 | MC2R      | 0   | No  |
| ESCC-D2 | ZNF560    | 0   | No  |
| ESCC-D2 | ACADL     | 0   | No  |
| ESCC-D3 | NFE2L2    | 231 | Yes |
| ESCC-D3 | PRDM2     | 20  | Yes |
| ESCC-D3 | HNRNPUL1  | 18  | Yes |
| ESCC-D3 | C10orf118 | 16  | Yes |
| ESCC-D3 | EGFR      | 16  | Yes |
| ESCC-D3 | C9orf78   | 15  | Yes |
| ESCC-D3 | ANKRD28   | 12  | Yes |
| ESCC-D3 | NAA35     | 11  | Yes |
| ESCC-D3 | TP53      | 11  | Yes |
| ESCC-D3 | NFATC3    | 11  | Yes |
| ESCC-D3 | PDZD2     | 10  | Yes |
| ESCC-D3 | MCM6      | 8   | Yes |
| ESCC-D3 | ACVR1B    | 7   | Yes |
| ESCC-D3 | FAM160A1  | 6   | Yes |
| ESCC-D3 | RASSF2    | 5   | Yes |
| ESCC-D3 | PAXIP1    | 5   | Yes |
| ESCC-D3 | PGBD2     | 4   | Yes |
| ESCC-D3 | ZNF540    | 3   | Yes |
| ESCC-D3 | KDR       | 3   | Yes |
| ESCC-D3 | SMO       | 3   | Yes |
| ESCC-D3 | FAM111B   | 3   | Yes |
| ESCC-D3 | LAMA2     | 3   | Yes |
| ESCC-D3 | NRM       | 2   | Yes |
| ESCC-D3 | ZNF34     | 2   | Yes |
| ESCC-D3 | TDRKH     | 2   | Yes |
| ESCC-D3 | SLC9A4    | 1   | Yes |
| ESCC-D3 | THSD7A    | 1   | Yes |
| ESCC-D3 | BAI3      | 0   | No  |
| ESCC-D3 | DNAH5     | 0   | No  |
| ESCC-D3 | TRPC3     | 0   | No  |
| ESCC-D3 | WDR64     | 0   | No  |
| ESCC-D3 | ERBB4     | 0   | No  |
| ESCC-D3 | AICDA     | 0   | No  |
| ESCC-D3 | XIRP2     | 0   | No  |
| ESCC-D3 | TAAR8     | 0   | No  |
| ESCC-D3 | OR6Q1     | 0   | No  |
| ESCC-D4 | HEPHL1    | 139 | Yes |
| ESCC-D4 | CTNND1    | 102 | Yes |

|         |           |    |     |
|---------|-----------|----|-----|
| ESCC-D4 | XRCC5     | 58 | Yes |
| ESCC-D4 | EIF3A     | 46 | Yes |
| ESCC-D4 | PTPRZ1    | 32 | Yes |
| ESCC-D4 | MAPK14    | 32 | Yes |
| ESCC-D4 | MAP3K13   | 31 | Yes |
| ESCC-D4 | DDX18     | 28 | Yes |
| ESCC-D4 | KLHL2     | 28 | Yes |
| ESCC-D4 | SH3YL1    | 27 | Yes |
| ESCC-D4 | RNF213    | 22 | Yes |
| ESCC-D4 | FRG1      | 22 | Yes |
| ESCC-D4 | IMP3      | 20 | Yes |
| ESCC-D4 | MUC4      | 14 | Yes |
| ESCC-D4 | DDX46     | 13 | Yes |
| ESCC-D4 | CTDSPL2   | 10 | Yes |
| ESCC-D4 | RAPGEF5   | 10 | Yes |
| ESCC-D4 | SORBS2    | 10 | Yes |
| ESCC-D4 | TRAK2     | 10 | Yes |
| ESCC-D4 | PML       | 9  | Yes |
| ESCC-D4 | MYCBP2    | 9  | Yes |
| ESCC-D4 | SF3A1     | 9  | Yes |
| ESCC-D4 | TP53BP1   | 9  | Yes |
| ESCC-D4 | TBC1D4    | 8  | Yes |
| ESCC-D4 | VPS13D    | 8  | Yes |
| ESCC-D4 | CHEK2     | 7  | Yes |
| ESCC-D4 | ARID2     | 7  | Yes |
| ESCC-D4 | TP53      | 7  | Yes |
| ESCC-D4 | ANKRD11   | 7  | Yes |
| ESCC-D4 | SULF2     | 6  | Yes |
| ESCC-D4 | ELAC2     | 6  | Yes |
| ESCC-D4 | DROSHA    | 5  | Yes |
| ESCC-D4 | POLR3A    | 5  | Yes |
| ESCC-D4 | PRPF40B   | 5  | Yes |
| ESCC-D4 | METTL18   | 5  | Yes |
| ESCC-D4 | FAM179B   | 4  | Yes |
| ESCC-D4 | TTI1      | 4  | Yes |
| ESCC-D4 | LRP1      | 4  | Yes |
| ESCC-D4 | ITFG3     | 4  | Yes |
| ESCC-D4 | CDK5RAP2  | 4  | Yes |
| ESCC-D4 | SPECC1    | 4  | Yes |
| ESCC-D4 | ANGPTL6   | 3  | Yes |
| ESCC-D4 | SLFN13    | 3  | Yes |
| ESCC-D4 | CHIT1     | 3  | Yes |
| ESCC-D4 | ABI3      | 3  | Yes |
| ESCC-D4 | ZNF182    | 3  | Yes |
| ESCC-D4 | HIRIP3    | 3  | Yes |
| ESCC-D4 | ALG10     | 2  | Yes |
| ESCC-D4 | FGD2      | 2  | Yes |
| ESCC-D4 | GJA9      | 1  | Yes |
| ESCC-D4 | CENPI     | 1  | Yes |
| ESCC-D4 | RAI1      | 1  | Yes |
| ESCC-D4 | F8        | 1  | Yes |
| ESCC-D4 | ZNF391    | 1  | Yes |
| ESCC-D4 | HTR2C     | 0  | No  |
| ESCC-D4 | CC2D2B    | 0  | No  |
| ESCC-D4 | RENBP     | 0  | No  |
| ESCC-D4 | LRP2BP    | 0  | No  |
| ESCC-D4 | YSK4      | 0  | No  |
| ESCC-D4 | TEX13B    | 0  | No  |
| ESCC-D4 | LGR6      | 0  | No  |
| ESCC-D4 | ABCB4     | 0  | No  |
| ESCC-D4 | TTN       | 0  | No  |
| ESCC-D4 | IQUB      | 0  | No  |
| ESCC-D4 | MYO3A     | 0  | No  |
| ESCC-D4 | DNAH7     | 0  | No  |
| ESCC-D4 | LRRC2     | 0  | No  |
| ESCC-D4 | WNK3      | 0  | No  |
| ESCC-D4 | C18orf34  | 0  | No  |
| ESCC-D4 | HRH2      | 0  | No  |
| ESCC-D4 | FAM5C     | 0  | No  |
| ESCC-D4 | SERPINA10 | 0  | No  |
| ESCC-D4 | SPHKAP    | 0  | No  |



|         |          |   |    |
|---------|----------|---|----|
| ESCC-D4 | OR2W5    | 0 | No |
| ESCC-D4 | FAM48B2  | 0 | No |
| ESCC-D4 | RG821    | 0 | No |
| ESCC-D4 | LRAT     | 0 | No |
| ESCC-D4 | PDE11A   | 0 | No |
| ESCC-D4 | CPNE4    | 0 | No |
| ESCC-D4 | C6       | 0 | No |
| ESCC-D4 | MYT1L    | 0 | No |
| ESCC-D4 | ZCCHC5   | 0 | No |
| ESCC-D4 | NELL1    | 0 | No |
| ESCC-D4 | C9orf170 | 0 | No |

Expression data of each gene was converted by using "FKPM (fragments per kilobase of exon model per million mapped reads)".

**Supplementary Table 5. Genes for targeted capture in Frequency Cohort study**

| Gene symbol | Discovery Cohort | COSMIC | Agrawal et al. <sup>6</sup> |
|-------------|------------------|--------|-----------------------------|
| ALK         |                  | yes    | yes                         |
| ABCA9       | yes              |        | yes                         |
| ABCC12      | yes              |        | yes                         |
| ADAMTS12    | yes              |        | yes                         |
| ALPK3       | yes              |        | yes                         |
| ANK2        | yes              |        | yes                         |
| ATP10D      | yes              |        | yes                         |
| BAI3        | yes              |        | yes                         |
| BDP1        | yes              |        | yes                         |
| CACNA1B     | yes              |        | yes                         |
| CEP350      | yes              |        | yes                         |
| CEP78       | yes              |        | yes                         |
| COL12A1     | yes              |        | yes                         |
| CREBZF      | yes              |        | yes                         |
| CSMD3       | yes              |        | yes                         |
| DCAF4L2     | yes              |        | yes                         |
| DNAH7       | yes              |        | yes                         |
| DROSHA      | yes              |        | yes                         |
| ELAC2       | yes              |        | yes                         |
| EPHB1       | yes              |        | yes                         |
| FAM135B     | yes              |        | yes                         |
| FAM196B     | yes              |        | yes                         |
| FAT1        | yes              |        | yes                         |
| FAT2        | yes              |        | yes                         |
| FLT1        | yes              |        | yes                         |
| FMN2        | yes              |        | yes                         |
| GOLGB1      | yes              |        | yes                         |
| GPR37       | yes              |        | yes                         |
| GPR39       | yes              |        | yes                         |
| GPR98       | yes              |        | yes                         |
| GPR98       | yes              |        | yes                         |
| GRIN3A      | yes              |        | yes                         |
| IGSF10      | yes              |        | yes                         |
| IMP2        | yes              |        | yes                         |
| KDMA6A      | yes              |        | yes                         |
| KIAA0947    | yes              |        | yes                         |
| KIF14       | yes              |        | yes                         |
| LPIN2       | yes              |        | yes                         |
| LRP1        | yes              |        | yes                         |
| LRR1Q3      | yes              |        | yes                         |
| LRRK2       | yes              |        | yes                         |
| MAB21L1     | yes              |        | yes                         |
| MCF2        | yes              |        | yes                         |
| MICA        | yes              |        | yes                         |
| MLL2        | yes              |        | yes                         |
| MUC16       | yes              |        | yes                         |
| MUC2        | yes              |        | yes                         |
| MUC5B       | yes              |        | yes                         |
| MYCBP2      | yes              |        | yes                         |
| MYH8        | yes              |        | yes                         |
| NCOR2       | yes              |        | yes                         |
| NFE2L2      | yes              |        | yes                         |
| NOTCH1      | yes              |        | yes                         |
| NRG3        | yes              |        | yes                         |
| NRXN1       | yes              |        | yes                         |
| OAF         | yes              |        | yes                         |
| OBSCN       | yes              |        | yes                         |
| PAPLN       | yes              |        | yes                         |
| PCDH9       | yes              |        | yes                         |
| PCDHB5      | yes              |        | yes                         |
| PCLO        | yes              |        | yes                         |
| PLXNA1      | yes              |        | yes                         |
| PPM1N       | yes              |        | yes                         |
| PRDM9       | yes              |        | yes                         |
| PRRC2A      | yes              |        | yes                         |
| PTPRD       | yes              |        | yes                         |
| RICTOR      | yes              |        | yes                         |
| RIMS2       | yes              |        | yes                         |
| SCD5        | yes              |        | yes                         |
| SECISBP2L   | yes              |        | yes                         |
| SELENBP1    | yes              |        | yes                         |
| SHANK1      | yes              |        | yes                         |
| SLC25A2     | yes              |        | yes                         |
| SLTM        | yes              |        | yes                         |
| SPAG9       | yes              |        | yes                         |
| SPTB        | yes              |        | yes                         |
| SRCAP       | yes              |        | yes                         |
| TACC2       | yes              |        | yes                         |
| TAF1L       | yes              |        | yes                         |
| TBC1D1      | yes              |        | yes                         |
| TEI1        | yes              |        | yes                         |
| THSD7A      | yes              |        | yes                         |
| TMEM106A    | yes              |        | yes                         |

| Gene symbol | Discovery Cohort | COSMIC | Agrawal et al. <sup>6</sup> |
|-------------|------------------|--------|-----------------------------|
| GC          | yes              |        | no                          |
| GCFC2       | yes              |        | no                          |
| GCLC        | yes              |        | no                          |
| GDDP4       | yes              |        | no                          |
| Gene        | yes              |        | no                          |
| GIMAP4      | yes              |        | no                          |
| GJA9        | yes              |        | no                          |
| GK2         | yes              |        | no                          |
| GNAO1       | yes              |        | no                          |
| GOLM1       | yes              |        | no                          |
| GOT1L1      | yes              |        | no                          |
| GPBAR1      | yes              |        | no                          |
| GPHN        | yes              |        | no                          |
| GPR112      | yes              |        | no                          |
| GPR124      | yes              |        | no                          |
| GPR37L1     | yes              |        | no                          |
| GPR88       | yes              |        | no                          |
| GPRIN3      | yes              |        | no                          |
| GRHL1       | yes              |        | no                          |
| GRIA2       | yes              |        | no                          |
| GRIK2       | yes              |        | no                          |
| GRM1        | yes              |        | no                          |
| GRM3        | yes              |        | no                          |
| GSTM1       | yes              |        | no                          |
| GTF3C4      | yes              |        | no                          |
| GULP1       | yes              |        | no                          |
| H1FOO       | yes              |        | no                          |
| HAND2       | yes              |        | no                          |
| HAPLN1      | yes              |        | no                          |
| HARS        | yes              |        | no                          |
| HCL51       | yes              |        | no                          |
| HCN2        | yes              |        | no                          |
| HDAC9       | yes              |        | no                          |
| HECTD1      | yes              |        | no                          |
| HEG1        | yes              |        | no                          |
| HELZ        | yes              |        | no                          |
| HEPHL1      | yes              |        | no                          |
| HERC6       | yes              |        | no                          |
| HERPUD2     | yes              |        | no                          |
| HHAT        | yes              |        | no                          |
| HHPL2       | yes              |        | no                          |
| HIRA        | yes              |        | no                          |
| HIRIP3      | yes              |        | no                          |
| HIST1H1C    | yes              |        | no                          |
| HIST1H2AG   | yes              |        | no                          |
| HIST1H2BG   | yes              |        | no                          |
| HIST1H4A    | yes              |        | no                          |
| HIST2H2AC   | yes              |        | no                          |
| HIST2H2BF   | yes              |        | no                          |
| HLA-DOA     | yes              |        | no                          |
| HLF         | yes              |        | no                          |
| HMCN1       | yes              |        | no                          |
| HNRNPUL1    | yes              |        | no                          |
| HOXB2       | yes              |        | no                          |
| HPS5        | yes              |        | no                          |
| HRH2        | yes              |        | no                          |
| HSF4        | yes              |        | no                          |
| HSPBAP1     | yes              |        | no                          |
| HTR1B       | yes              |        | no                          |
| HTR2C       | yes              |        | no                          |
| HTRA1       | yes              |        | no                          |
| HUWE1       | yes              |        | no                          |
| HYDIN       | yes              |        | no                          |
| IFLTD1      | yes              |        | no                          |
| IFT172      | yes              |        | no                          |
| IKBIP       | yes              |        | no                          |
| IKZF2       | yes              |        | no                          |
| IL16        | yes              |        | no                          |
| IL19        | yes              |        | no                          |
| IL1F10      | yes              |        | no                          |
| IMP3        | yes              |        | no                          |
| INTS9       | yes              |        | no                          |
| IPO4        | yes              |        | no                          |
| IPO9        | yes              |        | no                          |
| IPP         | yes              |        | no                          |
| IQGAP1      | yes              |        | no                          |
| IQUB        | yes              |        | no                          |
| ITFG3       | yes              |        | no                          |
| ITGA7       | yes              |        | no                          |
| ITGAL       | yes              |        | no                          |
| JAGN1       | yes              |        | no                          |
| JARID2      | yes              |        | no                          |
| KANSL1L     | yes              |        | no                          |

| Gene symbol | Discovery Cohort | COSMIC | Agrawal et al. <sup>6</sup> |
|-------------|------------------|--------|-----------------------------|
| SCN7A       | yes              |        | no                          |
| SEC14L3     | yes              |        | no                          |
| SEC14L5     | yes              |        | no                          |
| SEC22B      | yes              |        | no                          |
| SEC62       | yes              |        | no                          |
| SELO        | yes              |        | no                          |
| SEMA3A      | yes              |        | no                          |
| SEMA4C      | yes              |        | no                          |
| SENP3       | yes              |        | no                          |
| SEPT2       | yes              |        | no                          |
| SERPINA10   | yes              |        | no                          |
| SERPINB4    | yes              |        | no                          |
| SF3A1       | yes              |        | no                          |
| SH3YL1      | yes              |        | no                          |
| SHANK2      | yes              |        | no                          |
| SHCBP1      | yes              |        | no                          |
| SHROOM3     | yes              |        | no                          |
| SI          | yes              |        | no                          |
| SIAH3       | yes              |        | no                          |
| SIGLEC10    | yes              |        | no                          |
| SIN3A       | yes              |        | no                          |
| SIPALL2     | yes              |        | no                          |
| SKA2        | yes              |        | no                          |
| SLC1A2      | yes              |        | no                          |
| SLC22A23    | yes              |        | no                          |
| SLC26A7     | yes              |        | no                          |
| SLC26A8     | yes              |        | no                          |
| SLC2A7      | yes              |        | no                          |
| SLC39A13    | yes              |        | no                          |
| SLC43A2     | yes              |        | no                          |
| SLC4A10     | yes              |        | no                          |
| SLC4A3      | yes              |        | no                          |
| SLC4A8      | yes              |        | no                          |
| SLC5A4      | yes              |        | no                          |
| SLC8A1      | yes              |        | no                          |
| SLC9A3R1    | yes              |        | no                          |
| SLC9A4      | yes              |        | no                          |
| SLCO1A2     | yes              |        | no                          |
| SLCO1C1     | yes              |        | no                          |
| SLCO5A1     | yes              |        | no                          |
| SLFN13      | yes              |        | no                          |
| SMARCA1     | yes              |        | no                          |
| SMG5        | yes              |        | no                          |
| SMO         | yes              |        | no                          |
| SMTNL2      | yes              |        | no                          |
| SMYD4       | yes              |        | no                          |
| SNTB2       | yes              |        | no                          |
| SNX31       | yes              |        | no                          |
| SNX32       | yes              |        | no                          |
| SON         | yes              |        | no                          |
| SORBS2      | yes              |        | no                          |
| SPAG1       | yes              |        | no                          |
| SPANXN2     | yes              |        | no                          |
| SPAST       | yes              |        | no                          |
| SPECC1      | yes              |        | no                          |
| SPEF2       | yes              |        | no                          |
| SPEN        | yes              |        | no                          |
| SPHKAP      | yes              |        | no                          |
| SPTLC2      | yes              |        | no                          |
| SRD5A2      | yes              |        | no                          |
| SSFA2       | yes              |        | no                          |
| STAM        | yes              |        | no                          |
| STK38       | yes              |        | no                          |
| STRN3       | yes              |        | no                          |
| SULF2       | yes              |        | no                          |
| SUV39H2     | yes              |        | no                          |
| SYNE1       | yes              |        | no                          |
| SYNE2       | yes              |        | no                          |
| SYN11       | yes              |        | no                          |
| SYNM        | yes              |        | no                          |
| SZT2        | yes              |        | no                          |
| TAAR8       | yes              |        | no                          |
| TACR2       | yes              |        | no                          |
| TARSL2      | yes              |        | no                          |
| TATDN1      | yes              |        | no                          |
| TATDN2      | yes              |        | no                          |
| TAX1BP1     | yes              |        | no                          |
| TBC1D4      | yes              |        | no                          |
| TBL1Y       | yes              |        | no                          |
| TBRG1       | yes              |        | no                          |
| TDRD3       | yes              |        | no                          |
| TDRKH       | yes              |        | no                          |
| TEAD4       | yes              |        | no                          |

|          |     |  |     |
|----------|-----|--|-----|
| TMEM184A | yes |  | yes |
| TNN3K    | yes |  | yes |
| TOLLIP   | yes |  | yes |
| TP53     | yes |  | yes |
| TTC18    | yes |  | yes |
| TIN      | yes |  | yes |
| VPS13B   | yes |  | yes |
| WDR87    | yes |  | yes |
| XIRP2    | yes |  | yes |
| ZFAT     | yes |  | yes |
| ZFP42    | yes |  | yes |
| ZFP62    | yes |  | yes |
| ZNF107   | yes |  | yes |
| ZNF211   | yes |  | yes |
| ZNF717   | yes |  | yes |
| ZNF750   | yes |  | yes |
| A2M      | yes |  | no  |
| ABCA13   | yes |  | no  |
| ABCA3    | yes |  | no  |
| ABCA7    | yes |  | no  |
| ABCA8    | yes |  | no  |
| ABCB1    | yes |  | no  |
| ABCB4    | yes |  | no  |
| ABCB5    | yes |  | no  |
| ABCD1    | yes |  | no  |
| ABHD13   | yes |  | no  |
| ABI3     | yes |  | no  |
| ACADL    | yes |  | no  |
| ACOT12   | yes |  | no  |
| ACVR1B   | yes |  | no  |
| ADAM18   | yes |  | no  |
| ADAM2    | yes |  | no  |
| ADAMTS17 | yes |  | no  |
| ADAMTSL4 | yes |  | no  |
| ADCY10   | yes |  | no  |
| ADCY8    | yes |  | no  |
| ADD1     | yes |  | no  |
| ADH4     | yes |  | no  |
| ADRA2A   | yes |  | no  |
| ADRBK2   | yes |  | no  |
| AGMAT    | yes |  | no  |
| AHNAK2   | yes |  | no  |
| AHR      | yes |  | no  |
| AICDA    | yes |  | no  |
| AKAP6    | yes |  | no  |
| AKAP9    | yes |  | no  |
| ALG10    | yes |  | no  |
| AMIGO2   | yes |  | no  |
| AMOTL1   | yes |  | no  |
| ANAPC5   | yes |  | no  |
| ANG      | yes |  | no  |
| ANGPTL1  | yes |  | no  |
| ANGPTL6  | yes |  | no  |
| ANK1     | yes |  | no  |
| ANKHD1   | yes |  | no  |
| ANKIB1   | yes |  | no  |
| ANKMY1   | yes |  | no  |
| ANKRD11  | yes |  | no  |
| ANKRD12  | yes |  | no  |
| ANKRD28  | yes |  | no  |
| ANKRD33  | yes |  | no  |
| ANKRD50  | yes |  | no  |
| AP1B1    | yes |  | no  |
| AP2B1    | yes |  | no  |
| APCDD1   | yes |  | no  |
| APLNR    | yes |  | no  |
| APOA4    | yes |  | no  |
| APOA5    | yes |  | no  |
| ARHGAP29 | yes |  | no  |
| ARHGAP31 | yes |  | no  |
| ARHGEF17 | yes |  | no  |
| ARID2    | yes |  | no  |
| ARL13A   | yes |  | no  |
| ARMC1    | yes |  | no  |
| ARPP21   | yes |  | no  |
| ASPH     | yes |  | no  |
| ASPN     | yes |  | no  |
| ASTN1    | yes |  | no  |
| ASTN2    | yes |  | no  |
| ATAD2    | yes |  | no  |
| ATF6     | yes |  | no  |
| ATG7     | yes |  | no  |
| ATP11B   | yes |  | no  |
| ATP8B3   | yes |  | no  |
| ATRNL1   | yes |  | no  |
| ATXN7    | yes |  | no  |
| B3GAT2   | yes |  | no  |

|           |     |  |    |
|-----------|-----|--|----|
| KBTBD12   | yes |  | no |
| KCND3     | yes |  | no |
| KCNG1     | yes |  | no |
| KCNH4     | yes |  | no |
| KCNJ12    | yes |  | no |
| KCNQ2     | yes |  | no |
| KCNT2     | yes |  | no |
| KDM2B     | yes |  | no |
| KDR       | yes |  | no |
| KIAA0754  | yes |  | no |
| KIAA1009  | yes |  | no |
| KIAA1109  | yes |  | no |
| KIAA1429  | yes |  | no |
| KIAA1432  | yes |  | no |
| KIAA1804  | yes |  | no |
| KIF11     | yes |  | no |
| KIF13A    | yes |  | no |
| KIF4A     | yes |  | no |
| KIF5B     | yes |  | no |
| KL        | yes |  | no |
| KLHDC7A   | yes |  | no |
| KLHL1     | yes |  | no |
| KLHL2     | yes |  | no |
| KLHL20    | yes |  | no |
| KLHL24    | yes |  | no |
| KLHL3     | yes |  | no |
| KNTC1     | yes |  | no |
| KPNA1     | yes |  | no |
| KPNB1     | yes |  | no |
| KRT33A    | yes |  | no |
| KRTAP10-1 | yes |  | no |
| KRTAP15-1 | yes |  | no |
| KYNU      | yes |  | no |
| L3MBTL3   | yes |  | no |
| LAMA2     | yes |  | no |
| LAMA3     | yes |  | no |
| LAMA4     | yes |  | no |
| LAMB2     | yes |  | no |
| LAMB4     | yes |  | no |
| LBX1      | yes |  | no |
| LCT       | yes |  | no |
| LDOC1L    | yes |  | no |
| LGII      | yes |  | no |
| LGR6      | yes |  | no |
| LILRB1    | yes |  | no |
| LIN7B     | yes |  | no |
| LINS      | yes |  | no |
| LOC643802 | yes |  | no |
| LPPR4     | yes |  | no |
| LRAT      | yes |  | no |
| LRP1B     | yes |  | no |
| LRP2      | yes |  | no |
| LRP2BP    | yes |  | no |
| LRRC15    | yes |  | no |
| LRRC2     | yes |  | no |
| LRRC4C    | yes |  | no |
| LRRC61    | yes |  | no |
| LRRN2     | yes |  | no |
| LRRTM3    | yes |  | no |
| LRRTM4    | yes |  | no |
| LTBP3     | yes |  | no |
| LTN1      | yes |  | no |
| LYZ       | yes |  | no |
| MAB21L2   | yes |  | no |
| MAGEC1    | yes |  | no |
| MAGEC3    | yes |  | no |
| MAP1S     | yes |  | no |
| MAP2      | yes |  | no |
| MAP3K13   | yes |  | no |
| MAP3K15   | yes |  | no |
| MAP7D1    | yes |  | no |
| MAPK11    | yes |  | no |
| MAPK14    | yes |  | no |
| MARCH4    | yes |  | no |
| MARCH5    | yes |  | no |
| MAST4     | yes |  | no |
| MATN4     | yes |  | no |
| MC1R      | yes |  | no |
| MC2R      | yes |  | no |
| MCC       | yes |  | no |
| MCCC2     | yes |  | no |
| MCM3AP    | yes |  | no |
| MCM6      | yes |  | no |
| MCOLN1    | yes |  | no |
| ME3       | yes |  | no |
| MED1      | yes |  | no |
| MED13     | yes |  | no |

|           |     |  |    |
|-----------|-----|--|----|
| TECTA     | yes |  | no |
| TEKT4     | yes |  | no |
| TESK1     | yes |  | no |
| TEX13B    | yes |  | no |
| TEX2      | yes |  | no |
| TFAP2B    | yes |  | no |
| TFEC      | yes |  | no |
| TG        | yes |  | no |
| THOC1     | yes |  | no |
| THPO      | yes |  | no |
| THSD4     | yes |  | no |
| TIPARP    | yes |  | no |
| TLR7      | yes |  | no |
| TMED8     | yes |  | no |
| TMEM104   | yes |  | no |
| TMEM119   | yes |  | no |
| TMEM177   | yes |  | no |
| TMEM2     | yes |  | no |
| TMEM232   | yes |  | no |
| TMEM39B   | yes |  | no |
| TNF       | yes |  | no |
| TNFRSF12A | yes |  | no |
| TNIK      | yes |  | no |
| TNKS      | yes |  | no |
| TNN       | yes |  | no |
| TNRC6C    | yes |  | no |
| TOX4      | yes |  | no |
| TP53BP1   | yes |  | no |
| TPR       | yes |  | no |
| TPT       | yes |  | no |
| TRAIP     | yes |  | no |
| TRAK2     | yes |  | no |
| TRAPPC8   | yes |  | no |
| TRHDE     | yes |  | no |
| TRIM10    | yes |  | no |
| TRIM33    | yes |  | no |
| TRIM34    | yes |  | no |
| TRIM37    | yes |  | no |
| TRIM60    | yes |  | no |
| TRIO      | yes |  | no |
| TRIP10    | yes |  | no |
| TRPC3     | yes |  | no |
| TRPM6     | yes |  | no |
| TSPAN10   | yes |  | no |
| TSRI      | yes |  | no |
| TS1       | yes |  | no |
| TTBK2     | yes |  | no |
| TTC21B    | yes |  | no |
| TTC28     | yes |  | no |
| TTI1      | yes |  | no |
| TTLL12    | yes |  | no |
| U2AF1     | yes |  | no |
| UBE2O     | yes |  | no |
| UBE2Q1    | yes |  | no |
| UBN1      | yes |  | no |
| UFC1      | yes |  | no |
| UFL1      | yes |  | no |
| UHRF1     | yes |  | no |
| UNC13D    | yes |  | no |
| UNC79     | yes |  | no |
| UNC80     | yes |  | no |
| UNC93A    | yes |  | no |
| URB1      | yes |  | no |
| USH2A     | yes |  | no |
| USP18     | yes |  | no |
| USP24     | yes |  | no |
| USP26     | yes |  | no |
| USP29     | yes |  | no |
| USP31     | yes |  | no |
| UTP15     | yes |  | no |
| VANGL2    | yes |  | no |
| VASH1     | yes |  | no |
| VCAN      | yes |  | no |
| VCFIP1    | yes |  | no |
| VPS13D    | yes |  | no |
| VRK3      | yes |  | no |
| VSIG8     | yes |  | no |
| VWC2L     | yes |  | no |
| WDR26     | yes |  | no |
| WDR64     | yes |  | no |
| WDR66     | yes |  | no |
| WDR70     | yes |  | no |
| WDR92     | yes |  | no |
| WEE1      | yes |  | no |
| WFDC10B   | yes |  | no |
| WHAMM     | yes |  | no |
| WIPF1     | yes |  | no |

|           |     |  |    |
|-----------|-----|--|----|
| BAI1      | yes |  | no |
| BANF1     | yes |  | no |
| BAP1      | yes |  | no |
| BAZ1A     | yes |  | no |
| BBS12     | yes |  | no |
| BCAT1     | yes |  | no |
| BCL7B     | yes |  | no |
| BCL9      | yes |  | no |
| BCO2      | yes |  | no |
| BCORL1    | yes |  | no |
| BICD2     | yes |  | no |
| BIRC3     | yes |  | no |
| BP1FC     | yes |  | no |
| BPIL2     | yes |  | no |
| BRF1      | yes |  | no |
| C10orf118 | yes |  | no |
| C10orf71  | yes |  | no |
| C11orf48  | yes |  | no |
| C12orf12  | yes |  | no |
| C14orf43  | yes |  | no |
| C16orf62  | yes |  | no |
| C16orf70  | yes |  | no |
| C17orf104 | yes |  | no |
| C17orf57  | yes |  | no |
| C18orf34  | yes |  | no |
| C18orf63  | yes |  | no |
| C1orf106  | yes |  | no |
| C1orf65   | yes |  | no |
| C22orf25  | yes |  | no |
| C2orf55   | yes |  | no |
| C3        | yes |  | no |
| C5AR1     | yes |  | no |
| C5orf42   | yes |  | no |
| C5orf44   | yes |  | no |
| C6        | yes |  | no |
| C7        | yes |  | no |
| C8orf45   | yes |  | no |
| C9orf103  | yes |  | no |
| C9orf170  | yes |  | no |
| C9orf43   | yes |  | no |
| C9orf78   | yes |  | no |
| C9orf84   | yes |  | no |
| CA2       | yes |  | no |
| CA7       | yes |  | no |
| CACNA1E   | yes |  | no |
| CACNA2D1  | yes |  | no |
| CAMSPAP3  | yes |  | no |
| CAP1      | yes |  | no |
| CASP8AP2  | yes |  | no |
| CBLB      | yes |  | no |
| CBX4      | yes |  | no |
| CC2D2B    | yes |  | no |
| CCDC137   | yes |  | no |
| CCDC33    | yes |  | no |
| CCDC50    | yes |  | no |
| CCDC93    | yes |  | no |
| CCKAR     | yes |  | no |
| CCNB1IP1  | yes |  | no |
| CCR2      | yes |  | no |
| CCT8L2    | yes |  | no |
| CD200R1   | yes |  | no |
| CDH10     | yes |  | no |
| CDH12     | yes |  | no |
| CDH13     | yes |  | no |
| CDH23     | yes |  | no |
| CDHR1     | yes |  | no |
| CDK11B    | yes |  | no |
| CDK5RAP2  | yes |  | no |
| CDRT4     | yes |  | no |
| CEACAM18  | yes |  | no |
| CENPI     | yes |  | no |
| CEP164    | yes |  | no |
| CEP192    | yes |  | no |
| CEP95     | yes |  | no |
| CETP      | yes |  | no |
| CGN       | yes |  | no |
| CHD1L     | yes |  | no |
| CHD2      | yes |  | no |
| CHEK2     | yes |  | no |
| CHIT1     | yes |  | no |
| CHST11    | yes |  | no |
| CLCN4     | yes |  | no |
| CLCN6     | yes |  | no |
| CLEC4F    | yes |  | no |
| CLEC6A    | yes |  | no |
| CLIC5     | yes |  | no |
| CLN8      | yes |  | no |

|         |     |  |    |
|---------|-----|--|----|
| MED13L  | yes |  | no |
| MEF2C   | yes |  | no |
| MERTK   | yes |  | no |
| METTL18 | yes |  | no |
| MGAM    | yes |  | no |
| MGAT4C  | yes |  | no |
| MGAT5   | yes |  | no |
| MICAL2  | yes |  | no |
| MKI67   | yes |  | no |
| MKRN3   | yes |  | no |
| MLLT10  | yes |  | no |
| MLLT4   | yes |  | no |
| MLPH    | yes |  | no |
| MLX     | yes |  | no |
| MLXIP   | yes |  | no |
| MMRN1   | yes |  | no |
| MRC2    | yes |  | no |
| MRPL20  | yes |  | no |
| MRPL28  | yes |  | no |
| MRPL40  | yes |  | no |
| MTERFD1 | yes |  | no |
| MTHFR   | yes |  | no |
| MTMR4   | yes |  | no |
| MTOR    | yes |  | no |
| MUC17   | yes |  | no |
| MUC4    | yes |  | no |
| MUC6    | yes |  | no |
| MYBPC1  | yes |  | no |
| MYH15   | yes |  | no |
| MYH4    | yes |  | no |
| MYH6    | yes |  | no |
| MYO16   | yes |  | no |
| MYO18B  | yes |  | no |
| MYO3A   | yes |  | no |
| MYO9A   | yes |  | no |
| MYOG    | yes |  | no |
| MYRIP   | yes |  | no |
| MYT1L   | yes |  | no |
| N4BP2   | yes |  | no |
| N4BP3   | yes |  | no |
| NAA35   | yes |  | no |
| NACA    | yes |  | no |
| NALCN   | yes |  | no |
| NAV1    | yes |  | no |
| NAV3    | yes |  | no |
| NBEA    | yes |  | no |
| NBPF14  | yes |  | no |
| NCKAP1  | yes |  | no |
| NCKIPSD | yes |  | no |
| NCOA2   | yes |  | no |
| NDOR1   | yes |  | no |
| NEDD4   | yes |  | no |
| NEFM    | yes |  | no |
| NEK10   | yes |  | no |
| NELL1   | yes |  | no |
| NEU4    | yes |  | no |
| NEURL4  | yes |  | no |
| NF1     | yes |  | no |
| NFAT5   | yes |  | no |
| NFATC3  | yes |  | no |
| NFE2L3  | yes |  | no |
| NFIB    | yes |  | no |
| NFXL1   | yes |  | no |
| NISCH   | yes |  | no |
| NKX2-3  | yes |  | no |
| NLGN1   | yes |  | no |
| NLRCA   | yes |  | no |
| NLRP1   | yes |  | no |
| NMBR    | yes |  | no |
| NMD3    | yes |  | no |
| NNMT    | yes |  | no |
| NPAS4   | yes |  | no |
| NPHS2   | yes |  | no |
| NPR1    | yes |  | no |
| NRAP    | yes |  | no |
| NRM     | yes |  | no |
| NSFL1C  | yes |  | no |
| NSMCE2  | yes |  | no |
| NUFIP2  | yes |  | no |
| NUP210  | yes |  | no |
| OCA2    | yes |  | no |
| OR10J5  | yes |  | no |
| OR1F1   | yes |  | no |
| OR2A12  | yes |  | no |
| OR2B2   | yes |  | no |
| OR2L3   | yes |  | no |
| OR2M2   | yes |  | no |

|         |     |     |     |
|---------|-----|-----|-----|
| WNK3    | yes |     | no  |
| WWC3    | yes |     | no  |
| XPO1    | yes |     | no  |
| XPO5    | yes |     | no  |
| XRCC5   | yes |     | no  |
| XRN2    | yes |     | no  |
| YME1L1  | yes |     | no  |
| YSK4    | yes |     | no  |
| ZBBX    | yes |     | no  |
| ZBTB22  | yes |     | no  |
| ZC3H11A | yes |     | no  |
| ZC3H14  | yes |     | no  |
| ZC3H6   | yes |     | no  |
| ZC3H7B  | yes |     | no  |
| ZCCHC5  | yes |     | no  |
| ZDHHC22 | yes |     | no  |
| ZFHX3   | yes |     | no  |
| ZFHX4   | yes |     | no  |
| ZFP82   | yes |     | no  |
| ZMYM1   | yes |     | no  |
| ZNF134  | yes |     | no  |
| ZNF160  | yes |     | no  |
| ZNF165  | yes |     | no  |
| ZNF167  | yes |     | no  |
| ZNF180  | yes |     | no  |
| ZNF182  | yes |     | no  |
| ZNF185  | yes |     | no  |
| ZNF189  | yes |     | no  |
| ZNF207  | yes |     | no  |
| ZNF215  | yes |     | no  |
| ZNF221  | yes |     | no  |
| ZNF229  | yes |     | no  |
| ZNF24   | yes |     | no  |
| ZNF337  | yes |     | no  |
| ZNF34   | yes |     | no  |
| ZNF365  | yes |     | no  |
| ZNF391  | yes |     | no  |
| ZNF429  | yes |     | no  |
| ZNF518A | yes |     | no  |
| ZNF540  | yes |     | no  |
| ZNF554  | yes |     | no  |
| ZNF560  | yes |     | no  |
| ZNF583  | yes |     | no  |
| ZNF626  | yes |     | no  |
| ZNF629  | yes |     | no  |
| ZNF643  | yes |     | no  |
| ZNF714  | yes |     | no  |
| ZNF749  | yes |     | no  |
| ZNF761  | yes |     | no  |
| ZNF799  | yes |     | no  |
| ZNF831  | yes |     | no  |
| ZNF835  | yes |     | no  |
| ZNF836  | yes |     | no  |
| ZNF98   | yes |     | no  |
| ZNF99   | yes |     | no  |
| ZSCAN18 | yes |     | no  |
| MAP3K4  | yes |     | no  |
| ATAD2   | yes |     | no  |
| ATAD2   | yes |     | no  |
| MAP3K4  | yes |     | no  |
| OMA1    | yes |     | no  |
| PTCH1   | yes |     | no  |
| CD33    | yes |     | no  |
| MAP3K9  | yes |     | no  |
| SNTG2   | yes |     | no  |
| AFF2    | yes |     | no  |
| BTRC    | yes |     | no  |
| NUDT2   | yes |     | no  |
| BRCA1   | no  | yes | yes |
| BRCA2   | no  | yes | yes |
| CREBBP  | no  | yes | yes |
| DNM2    | no  | yes | yes |
| FBXW7   | no  | yes | yes |
| FGFR3   | no  | yes | yes |
| GNAS    | no  | yes | yes |
| GOPC    | no  | yes | yes |
| MLL3    | no  | yes | yes |
| ABL1    | no  | yes | no  |
| AKT1    | no  | yes | no  |
| AKT2    | no  | yes | no  |
| APC     | no  | yes | no  |
| ARID1A  | no  | yes | no  |
| ASXL1   | no  | yes | no  |
| ATM     | no  | yes | no  |
| ATRX    | no  | yes | no  |
| BCL6    | no  | yes | no  |
| BHD     | no  | yes | no  |

|         |     |  |    |
|---------|-----|--|----|
| CLTC    | yes |  | no |
| CMYA5   | yes |  | no |
| CNNM2   | yes |  | no |
| CNOT6L  | yes |  | no |
| CNTN5   | yes |  | no |
| COBL    | yes |  | no |
| COL11A1 | yes |  | no |
| COL22A1 | yes |  | no |
| COL24A1 | yes |  | no |
| COL4A4  | yes |  | no |
| COLEC12 | yes |  | no |
| COPS2   | yes |  | no |
| CPLX3   | yes |  | no |
| CPNE4   | yes |  | no |
| CRB1    | yes |  | no |
| CRLF3   | yes |  | no |
| CRNKL1  | yes |  | no |
| CSK     | yes |  | no |
| CSN1S1  | yes |  | no |
| CSTF2T  | yes |  | no |
| CTC1    | yes |  | no |
| CTDSPL2 | yes |  | no |
| CTLA4   | yes |  | no |
| CTNNA3  | yes |  | no |
| CTNND1  | yes |  | no |
| CTSK    | yes |  | no |
| CTSO    | yes |  | no |
| CUBN    | yes |  | no |
| CWC27   | yes |  | no |
| CWF19L2 | yes |  | no |
| CXCR1   | yes |  | no |
| CXorf66 | yes |  | no |
| CYL2    | yes |  | no |
| CYP27C1 | yes |  | no |
| CYP2J2  | yes |  | no |
| CYP7B1  | yes |  | no |
| DCAF11  | yes |  | no |
| DDAH2   | yes |  | no |
| DDX1    | yes |  | no |
| DDX18   | yes |  | no |
| DDX4    | yes |  | no |
| DDX42   | yes |  | no |
| DDX46   | yes |  | no |
| DDX5    | yes |  | no |
| DGKB    | yes |  | no |
| DHR51   | yes |  | no |
| DHX32   | yes |  | no |
| DHX33   | yes |  | no |
| DIAPH3  | yes |  | no |
| DIP2B   | yes |  | no |
| DISP2   | yes |  | no |
| DKK2    | yes |  | no |
| DLA     | yes |  | no |
| DMD     | yes |  | no |
| DMRT2   | yes |  | no |
| DMXL1   | yes |  | no |
| DMXL2   | yes |  | no |
| DNAH10  | yes |  | no |
| DNAH5   | yes |  | no |
| DNAH6   | yes |  | no |
| DNAH8   | yes |  | no |
| DNAH9   | yes |  | no |
| DNAI1   | yes |  | no |
| DNMT1   | yes |  | no |
| DPCR1   | yes |  | no |
| DQX1    | yes |  | no |
| DSCAML1 | yes |  | no |
| DSP     | yes |  | no |
| DSPP    | yes |  | no |
| EAPP    | yes |  | no |
| EDARADD | yes |  | no |
| EFEMP1  | yes |  | no |
| EFEMP2  | yes |  | no |
| EGFR    | yes |  | no |
| EIF2C1  | yes |  | no |
| EIF3A   | yes |  | no |
| EIF3H   | yes |  | no |
| EMILIN2 | yes |  | no |
| EMR3    | yes |  | no |
| ENOX2   | yes |  | no |
| ENPP1   | yes |  | no |
| ENPP3   | yes |  | no |
| ENTPD4  | yes |  | no |
| EP300   | yes |  | no |
| EPAS1   | yes |  | no |
| EPHA4   | yes |  | no |
| EPHA7   | yes |  | no |

|          |     |  |    |
|----------|-----|--|----|
| OR2W5    | yes |  | no |
| OR4D11   | yes |  | no |
| OR4D6    | yes |  | no |
| OR4F15   | yes |  | no |
| OR4L1    | yes |  | no |
| OR51F2   | yes |  | no |
| OR52E2   | yes |  | no |
| OR5K3    | yes |  | no |
| OR6Q1    | yes |  | no |
| OR6X1    | yes |  | no |
| OR7A10   | yes |  | no |
| OR8B8    | yes |  | no |
| ORC5     | yes |  | no |
| OSCP1    | yes |  | no |
| OTOA     | yes |  | no |
| OTOGL    | yes |  | no |
| OXR1     | yes |  | no |
| PABPC3   | yes |  | no |
| PAM      | yes |  | no |
| PAMR1    | yes |  | no |
| PAN2     | yes |  | no |
| PASD1    | yes |  | no |
| PCDH10   | yes |  | no |
| PCDH11X  | yes |  | no |
| PCDH20   | yes |  | no |
| PCDHA10  | yes |  | no |
| PCDHA2   | yes |  | no |
| PCDHA4   | yes |  | no |
| PCDHB1   | yes |  | no |
| PCDHGB1  | yes |  | no |
| PCSK4    | yes |  | no |
| PCSK5    | yes |  | no |
| PDE11A   | yes |  | no |
| PDE3B    | yes |  | no |
| PDE6C    | yes |  | no |
| PDHA2    | yes |  | no |
| PDZD2    | yes |  | no |
| PDZRN3   | yes |  | no |
| PGBD2    | yes |  | no |
| PGM2L1   | yes |  | no |
| PHF17    | yes |  | no |
| PHF3     | yes |  | no |
| PHKB     | yes |  | no |
| PHTF1    | yes |  | no |
| PIGK     | yes |  | no |
| PIK3C2A  | yes |  | no |
| PIK3CG   | yes |  | no |
| PIP5K1B  | yes |  | no |
| PITPNM3  | yes |  | no |
| PITRM1   | yes |  | no |
| PIWIL3   | yes |  | no |
| PJA1     | yes |  | no |
| PKM2     | yes |  | no |
| PKN3     | yes |  | no |
| PLA2G7   | yes |  | no |
| PLAG1    | yes |  | no |
| PLCH2    | yes |  | no |
| PLEC     | yes |  | no |
| PLEKHD1  | yes |  | no |
| PLIN1    | yes |  | no |
| PLOD1    | yes |  | no |
| PLSCR2   | yes |  | no |
| PLXDC1   | yes |  | no |
| PLXNA4   | yes |  | no |
| PML      | yes |  | no |
| PNMAL1   | yes |  | no |
| POLD2    | yes |  | no |
| POLQ     | yes |  | no |
| POLR3A   | yes |  | no |
| PPFIA1   | yes |  | no |
| PPFIA2   | yes |  | no |
| PPMIJ    | yes |  | no |
| PPP1R10  | yes |  | no |
| PPP1R12B | yes |  | no |
| PPP1R7   | yes |  | no |
| PPP4R1   | yes |  | no |
| PRAMEF2  | yes |  | no |
| PRDM2    | yes |  | no |
| PRIMA1   | yes |  | no |
| PRKD1    | yes |  | no |
| PROX1    | yes |  | no |
| PRPF40B  | yes |  | no |
| PRR5L    | yes |  | no |
| PRRC2C   | yes |  | no |
| PRSS46   | yes |  | no |
| PTCHD4   | yes |  | no |
| PTEN     | yes |  | no |

|             |    |     |    |
|-------------|----|-----|----|
| BLM         | no | yes | no |
| BMPRIA      | no | yes | no |
| BRAF        | no | yes | no |
| BRIP1       | no | yes | no |
| BUB1B       | no | yes | no |
| CARD11      | no | yes | no |
| CBL         | no | yes | no |
| CBLC        | no | yes | no |
| CCNE1       | no | yes | no |
| CD79A       | no | yes | no |
| CD79B       | no | yes | no |
| CDH1        | no | yes | no |
| CDK12       | no | yes | no |
| CDK4        | no | yes | no |
| CDKN2A      | no | yes | no |
| CDKN2a(p14) | no | yes | no |
| CDKN2C      | no | yes | no |
| CEBPA       | no | yes | no |
| CIC         | no | yes | no |
| COPEB       | no | yes | no |
| CRLF2       | no | yes | no |
| CTNNB1      | no | yes | no |
| CYLD        | no | yes | no |
| DAXX        | no | yes | no |
| DDB2        | no | yes | no |
| DICER1      | no | yes | no |
| DNMT3A      | no | yes | no |
| ECT2L       | no | yes | no |
| ERBB2       | no | yes | no |
| ERCC3       | no | yes | no |
| ERCC4       | no | yes | no |
| ERCC5       | no | yes | no |
| EXT1        | no | yes | no |
| EXT2        | no | yes | no |
| EZH2        | no | yes | no |
| FAM46C      | no | yes | no |
| FANCA       | no | yes | no |
| FANCC       | no | yes | no |
| FANCD2      | no | yes | no |
| FANCE       | no | yes | no |
| FANCF       | no | yes | no |
| FANCG       | no | yes | no |
| FBXO1       | no | yes | no |
| FGFR2       | no | yes | no |
| FH          | no | yes | no |
| FLT3        | no | yes | no |
| FOXO2       | no | yes | no |
| FUBP1       | no | yes | no |
| GATA1       | no | yes | no |
| GATA2       | no | yes | no |
| GATA3       | no | yes | no |
| GNAI1       | no | yes | no |
| GNAQ        | no | yes | no |
| GPC3        | no | yes | no |
| GRAF        | no | yes | no |
| H3F3A       | no | yes | no |
| HRAS        | no | yes | no |
| HRPT2       | no | yes | no |
| IDH1        | no | yes | no |
| IDH2        | no | yes | no |
| IKZF1       | no | yes | no |
| IL6ST       | no | yes | no |
| IL7R        | no | yes | no |
| JAK1        | no | yes | no |
| JAK2        | no | yes | no |
| JAK3        | no | yes | no |
| JUN         | no | yes | no |
| KDM5C       | no | yes | no |
| KIAA1549    | no | yes | no |
| KIT         | no | yes | no |
| KRAS        | no | yes | no |
| LMO1        | no | yes | no |
| MADH4       | no | yes | no |
| MAP2K4      | no | yes | no |
| MDM2        | no | yes | no |
| MDM4        | no | yes | no |
| MED12       | no | yes | no |
| MEN1        | no | yes | no |
| MET         | no | yes | no |
| MITF        | no | yes | no |
| MLH1        | no | yes | no |
| MLL         | no | yes | no |
| MPL         | no | yes | no |
| MSH2        | no | yes | no |
| MSH6        | no | yes | no |
| MUTYH       | no | yes | no |
| MYC         | no | yes | no |

|                 |     |  |    |
|-----------------|-----|--|----|
| <i>EPHB6</i>    | yes |  | no |
| <i>EPPK1</i>    | yes |  | no |
| <i>EP71</i>     | yes |  | no |
| <i>ERAL1</i>    | yes |  | no |
| <i>ERBB4</i>    | yes |  | no |
| <i>ERCC2</i>    | yes |  | no |
| <i>ERMN</i>     | yes |  | no |
| <i>ERP44</i>    | yes |  | no |
| <i>EVC2</i>     | yes |  | no |
| <i>EXOC1</i>    | yes |  | no |
| <i>F8</i>       | yes |  | no |
| <i>FADS3</i>    | yes |  | no |
| <i>FAM111B</i>  | yes |  | no |
| <i>FAM122B</i>  | yes |  | no |
| <i>FAM160A1</i> | yes |  | no |
| <i>FAM169A</i>  | yes |  | no |
| <i>FAM179B</i>  | yes |  | no |
| <i>FAM184A</i>  | yes |  | no |
| <i>FAM194A</i>  | yes |  | no |
| <i>FAM205A</i>  | yes |  | no |
| <i>FAM208B</i>  | yes |  | no |
| <i>FAM47A</i>   | yes |  | no |
| <i>FAM48B2</i>  | yes |  | no |
| <i>FAM55A</i>   | yes |  | no |
| <i>FAM5C</i>    | yes |  | no |
| <i>FAM75D4</i>  | yes |  | no |
| <i>FAM91A1</i>  | yes |  | no |
| <i>FANI</i>     | yes |  | no |
| <i>FAR2</i>     | yes |  | no |
| <i>FASTKD1</i>  | yes |  | no |
| <i>FAT3</i>     | yes |  | no |
| <i>FAXC</i>     | yes |  | no |
| <i>FBN1</i>     | yes |  | no |
| <i>FBN2</i>     | yes |  | no |
| <i>FBXL18</i>   | yes |  | no |
| <i>FBXL2</i>    | yes |  | no |
| <i>FBXO28</i>   | yes |  | no |
| <i>FBXO46</i>   | yes |  | no |
| <i>FCHSD2</i>   | yes |  | no |
| <i>FEZ1</i>     | yes |  | no |
| <i>FGD2</i>     | yes |  | no |
| <i>FILIP1L</i>  | yes |  | no |
| <i>FLNC</i>     | yes |  | no |
| <i>FMN1</i>     | yes |  | no |
| <i>FMOD</i>     | yes |  | no |
| <i>FN1</i>      | yes |  | no |
| <i>FNDL1</i>    | yes |  | no |
| <i>FNIP1</i>    | yes |  | no |
| <i>FOXC1</i>    | yes |  | no |
| <i>FSIP2</i>    | yes |  | no |
| <i>FTS3</i>     | yes |  | no |
| <i>FZD10</i>    | yes |  | no |
| <i>FZD3</i>     | yes |  | no |
| <i>FZD6</i>     | yes |  | no |
| <i>GABRG2</i>   | yes |  | no |
| <i>GARNL3</i>   | yes |  | no |
| <i>GATAD2B</i>  | yes |  | no |
| <i>GBP7</i>     | yes |  | no |
| <i>GBX2</i>     | yes |  | no |

|                 |     |  |    |
|-----------------|-----|--|----|
| <i>PTGER1</i>   | yes |  | no |
| <i>PTGIS</i>    | yes |  | no |
| <i>PTK7</i>     | yes |  | no |
| <i>PTPN13</i>   | yes |  | no |
| <i>PTPN22</i>   | yes |  | no |
| <i>PTPRK</i>    | yes |  | no |
| <i>PTPRZ1</i>   | yes |  | no |
| <i>PUS3</i>     | yes |  | no |
| <i>PXN</i>      | yes |  | no |
| <i>PYROXD2</i>  | yes |  | no |
| <i>QSL1</i>     | yes |  | no |
| <i>RAB40A</i>   | yes |  | no |
| <i>RABGAP1L</i> | yes |  | no |
| <i>RAI1</i>     | yes |  | no |
| <i>RALGAPB</i>  | yes |  | no |
| <i>RALGDS</i>   | yes |  | no |
| <i>RALY</i>     | yes |  | no |
| <i>RANBP17</i>  | yes |  | no |
| <i>RAP1B</i>    | yes |  | no |
| <i>RAPGEF5</i>  | yes |  | no |
| <i>RASGRP3</i>  | yes |  | no |
| <i>RASL10B</i>  | yes |  | no |
| <i>RASSF2</i>   | yes |  | no |
| <i>RB1</i>      | yes |  | no |
| <i>RBL2</i>     | yes |  | no |
| <i>RBM12B</i>   | yes |  | no |
| <i>RBM25</i>    | yes |  | no |
| <i>RCOR3</i>    | yes |  | no |
| <i>RECQL</i>    | yes |  | no |
| <i>RENPB</i>    | yes |  | no |
| <i>RERE</i>     | yes |  | no |
| <i>RGNEF</i>    | yes |  | no |
| <i>RGS2</i>     | yes |  | no |
| <i>RGS20</i>    | yes |  | no |
| <i>RGS21</i>    | yes |  | no |
| <i>RHAG</i>     | yes |  | no |
| <i>RHBDD2</i>   | yes |  | no |
| <i>RLN1</i>     | yes |  | no |
| <i>RNF139</i>   | yes |  | no |
| <i>RNF175</i>   | yes |  | no |
| <i>RNF213</i>   | yes |  | no |
| <i>RNF216</i>   | yes |  | no |
| <i>ROBO2</i>    | yes |  | no |
| <i>RP1</i>      | yes |  | no |
| <i>RP1L1</i>    | yes |  | no |
| <i>RPLP0</i>    | yes |  | no |
| <i>RPS6KA6</i>  | yes |  | no |
| <i>RQCD1</i>    | yes |  | no |
| <i>RKM2</i>     | yes |  | no |
| <i>RSF1</i>     | yes |  | no |
| <i>RTKN</i>     | yes |  | no |
| <i>RUNDC3B</i>  | yes |  | no |
| <i>SALL3</i>    | yes |  | no |
| <i>SAMD9L</i>   | yes |  | no |
| <i>SBK2</i>     | yes |  | no |
| <i>SCG2</i>     | yes |  | no |
| <i>SCN11A</i>   | yes |  | no |
| <i>SCN5A</i>    | yes |  | no |

|                 |    |     |     |
|-----------------|----|-----|-----|
| <i>MYCL1</i>    | no | yes | no  |
| <i>MYCN</i>     | no | yes | no  |
| <i>MYD88</i>    | no | yes | no  |
| <i>NBS1</i>     | no | yes | no  |
| <i>NF2</i>      | no | yes | no  |
| <i>NKX2-1</i>   | no | yes | no  |
| <i>NOTCH2</i>   | no | yes | no  |
| <i>NPM1</i>     | no | yes | no  |
| <i>NRAS</i>     | no | yes | no  |
| <i>PALB2</i>    | no | yes | no  |
| <i>PAX5</i>     | no | yes | no  |
| <i>PBRM1</i>    | no | yes | no  |
| <i>PDGFRA</i>   | no | yes | no  |
| <i>PHF6</i>     | no | yes | no  |
| <i>PHOX2B</i>   | no | yes | no  |
| <i>PIK3CA</i>   | no | yes | no  |
| <i>PIK3R1</i>   | no | yes | no  |
| <i>PMS1</i>     | no | yes | no  |
| <i>PMS2</i>     | no | yes | no  |
| <i>PPP2R1A</i>  | no | yes | no  |
| <i>PRDM1</i>    | no | yes | no  |
| <i>PRF1</i>     | no | yes | no  |
| <i>PRKARIA</i>  | no | yes | no  |
| <i>PTCH</i>     | no | yes | no  |
| <i>PTPN11</i>   | no | yes | no  |
| <i>RECQL4</i>   | no | yes | no  |
| <i>REL</i>      | no | yes | no  |
| <i>RET</i>      | no | yes | no  |
| <i>SBDS</i>     | no | yes | no  |
| <i>SDH5</i>     | no | yes | no  |
| <i>SDHB</i>     | no | yes | no  |
| <i>SDHC</i>     | no | yes | no  |
| <i>SDHD</i>     | no | yes | no  |
| <i>SETD2</i>    | no | yes | no  |
| <i>SF3B1</i>    | no | yes | no  |
| <i>SMARCA4</i>  | no | yes | no  |
| <i>SMARCB1</i>  | no | yes | no  |
| <i>SOCS1</i>    | no | yes | no  |
| <i>SOX2</i>     | no | yes | no  |
| <i>SRSF2</i>    | no | yes | no  |
| <i>STK11</i>    | no | yes | no  |
| <i>SUFU</i>     | no | yes | no  |
| <i>TCF1</i>     | no | yes | no  |
| <i>TET2</i>     | no | yes | no  |
| <i>TNFAIP3</i>  | no | yes | no  |
| <i>TNFRSF14</i> | no | yes | no  |
| <i>TNFRSF6</i>  | no | yes | no  |
| <i>TSC1</i>     | no | yes | no  |
| <i>TSC2</i>     | no | yes | no  |
| <i>TSHR</i>     | no | yes | no  |
| <i>VHL</i>      | no | yes | no  |
| <i>WAS</i>      | no | yes | no  |
| <i>WRN</i>      | no | yes | no  |
| <i>WT1</i>      | no | yes | no  |
| <i>WTX</i>      | no | yes | no  |
| <i>XPA</i>      | no | yes | no  |
| <i>XPC</i>      | no | yes | no  |
| <i>ZRSR2</i>    | no | yes | no  |
| <i>BCOR</i>     | no | yes | yes |

**Supplementary Table 6. Summary of somatic mutations in Frequency Cohort**

| Patient ID | Mutation location | Gene Name                                                                                                  | Mutation type        | Amino Acid Change               | Cosmic V58 Match Position      | Chr   | Start position | End position | Germline allele | Tumor allele |
|------------|-------------------|------------------------------------------------------------------------------------------------------------|----------------------|---------------------------------|--------------------------------|-------|----------------|--------------|-----------------|--------------|
| ESCC-F1    | exonic            | <i>RERE</i>                                                                                                | nonsynonymous SNV    | NM_001042682:c.C438A;p.D146E    |                                | chr1  | 8421467        | 8421467      | G               | T            |
| ESCC-F1    | exonic            | <i>KLHDC7A</i>                                                                                             | stopgain SNV         | NL_152375:c.G1309T;p.E437X      |                                | chr1  | 18808784       | 18808784     | G               | T            |
| ESCC-F1    | exonic            | <i>HMCN1</i>                                                                                               | nonsynonymous SNV    | NM_031935:c.G15283A;p.G5095R    |                                | chr1  | 186134269      | 186134269    | G               | A            |
| ESCC-F1    | exonic            | <i>HPS5</i>                                                                                                | nonsynonymous SNV    | NM_007216:c.C2545G;p.L849V      |                                | chr11 | 18306957       | 18306957     | G               | C            |
| ESCC-F1    | exonic            | <i>FAT3</i>                                                                                                | nonsynonymous SNV    | NM_001008781:c.A6613G;p.I2205V  |                                | chr11 | 92532792       | 92532792     | A               | G            |
| ESCC-F1    | exonic            | <i>MLL2</i>                                                                                                | nonsynonymous SNV    | NM_003482:c.G8992C;p.D2998H     |                                | chr12 | 49432147       | 49432147     | C               | G            |
| ESCC-F1    | exonic            | <i>TRHDE</i>                                                                                               | nonsynonymous SNV    | NM_013381:c.C2203G;p.Q735E      |                                | chr12 | 73012687       | 73012687     | C               | G            |
| ESCC-F1    | exonic            | <i>AKAP6</i>                                                                                               | nonsynonymous SNV    | NM_004274:c.A2932T;p.M978L      |                                | chr14 | 33165248       | 33165248     | A               | T            |
| ESCC-F1    | exonic            | <i>HYDIN</i>                                                                                               | nonsynonymous SNV    | NM_032821:c.G12130T;p.V4044L    |                                | chr16 | 70891770       | 70891770     | C               | A            |
| ESCC-F1    | exonic            | <i>TP53</i>                                                                                                | nonsynonymous SNV    | NM_001126115:c.C346T;p.R116W    | 687804;724870;749715;753533;75 | chr17 | 7577539        | 7577539      | G               | A            |
| ESCC-F1    | exonic            | <i>MYH2</i>                                                                                                | nonsynonymous SNV    | NM_001100112:c.G61A;p.E21K      |                                | chr17 | 10451177       | 10451177     | C               | T            |
| ESCC-F1    | exonic            | <i>KCNJ12,KCNJ18</i>                                                                                       | nonsynonymous SNV    | NM_001194958:c.C926A;p.T309N    |                                | chr17 | 21319580       | 21319580     | C               | A            |
| ESCC-F1    | exonic            | <i>ZNF560</i>                                                                                              | nonsynonymous SNV    | NM_152476:c.C1334G;p.P445R      |                                | chr19 | 9578289        | 9578289      | G               | C            |
| ESCC-F1    | exonic            | <i>SMARCA4</i>                                                                                             | stopgain SNV         | NM_001128845:c.C2272T;p.Q758X   | 722045                         | chr19 | 11121205       | 11121205     | C               | T            |
| ESCC-F1    | exonic            | <i>ZNF836</i>                                                                                              | nonsynonymous SNV    | NM_001102657:c.G2186C;p.R729T   |                                | chr19 | 52658750       | 52658750     | C               | G            |
| ESCC-F1    | exonic            | <i>ZNF347</i>                                                                                              | nonsynonymous SNV    | NM_001172674:c.G986T;p.R329L    |                                | chr19 | 53645098       | 53645098     | C               | A            |
| ESCC-F1    | exonic            | <i>SLC8A1</i>                                                                                              | nonsynonymous SNV    | NM_001112800:c.G23A;p.S8N       |                                | chr2  | 40657398       | 40657398     | C               | T            |
| ESCC-F1    | exonic            | <i>CYP27C1</i>                                                                                             | nonsynonymous SNV    | NM_001001665:c.T767A;p.L256Q    |                                | chr2  | 127951396      | 127951396    | A               | T            |
| ESCC-F1    | exonic            | <i>DNAH7</i>                                                                                               | nonsynonymous SNV    | NM_018897:c.C7801G;p.Q260E      |                                | chr2  | 196723464      | 196723464    | G               | C            |
| ESCC-F1    | exonic            | <i>ERBB4</i>                                                                                               | nonsynonymous SNV    | NM_001042599:c.C346G;p.P1154A   |                                | chr2  | 212248759      | 212248759    | C               | A            |
| ESCC-F1    | splicing          | <i>CHEK2(NM_007194:exon4:c.320-2A&gt;T,NM_145862:exon4:c.320-2A&gt;T,NM_001005735:exon5:c.449-2A&gt;T)</i> |                      |                                 |                                | chr22 | 29121357       | 29121357     | T               | A            |
| ESCC-F1    | exonic            | <i>ATXN7</i>                                                                                               | nonsynonymous SNV    | NM_001177387:c.G430A;p.D144N    |                                | chr3  | 63938090       | 63938090     | G               | A            |
| ESCC-F1    | exonic            | <i>GK2</i>                                                                                                 | nonsynonymous SNV    | NM_033214:c.T1080G;p.F360L      |                                | chr4  | 80328275       | 80328275     | A               | C            |
| ESCC-F1    | exonic            | <i>VCAN</i>                                                                                                | nonsynonymous SNV    | NM_001164097:c.C5884T;p.P1962S  |                                | chr5  | 82837667       | 82837667     | C               | T            |
| ESCC-F1    | exonic            | <i>GPR98</i>                                                                                               | nonsynonymous SNV    | NM_032119:c.T6962C;p.V232A      |                                | chr5  | 89988432       | 89988432     | T               | C            |
| ESCC-F1    | exonic            | <i>FAT2</i>                                                                                                | nonsynonymous SNV    | NM_001447:c.G2439T;p.W813C      |                                | chr5  | 150946054      | 150946054    | C               | A            |
| ESCC-F1    | exonic            | <i>BAI3</i>                                                                                                | nonsynonymous SNV    | NM_001704:c.G967C;p.G323R       |                                | chr6  | 69646509       | 69646509     | G               | C            |
| ESCC-F1    | exonic            | <i>MUC17</i>                                                                                               | nonsynonymous SNV    | NM_001040105:c.C2978T;p.T993M   |                                | chr7  | 100677675      | 100677675    | C               | T            |
| ESCC-F1    | exonic            | <i>RP1L1</i>                                                                                               | nonsynonymous SNV    | NM_178857:c.G6323T;p.G2108V     |                                | chr8  | 10465285       | 10465285     | C               | A            |
| ESCC-F1    | exonic            | <i>PIP5K1B</i>                                                                                             | nonsynonymous SNV    | NM_003558:c.C1532A;p.T511N      |                                | chr9  | 71606085       | 71606085     | C               | A            |
| ESCC-F1    | exonic            | <i>FAM75D1</i>                                                                                             | nonsynonymous SNV    | NM_001001670:c.G2332C;p.E778Q   |                                | chr9  | 84607717       | 84607717     | G               | C            |
| ESCC-F1    | exonic            | <i>ENOX2</i>                                                                                               | nonsynonymous SNV    | NM_006375:c.G1688A;p.G563E      |                                | chrX  | 129759346      | 129759346    | C               | T            |
| ESCC-F1    | exonic            | <i>ENOX2</i>                                                                                               | nonsynonymous SNV    | NM_006375:c.G569A;p.R190H       |                                | chrX  | 129804064      | 129804064    | C               | T            |
| ESCC-F1    | exonic            | <i>MAGEC3</i>                                                                                              | nonsynonymous SNV    | NM_177456:c.G490A;p.E164K       |                                | chrX  | 140984928      | 140984928    | G               | A            |
| ESCC-F2    | splicing          | <i>CUBN(NM_001081:exon10:c.884-2A&gt;T)</i>                                                                |                      |                                 |                                | chr10 | 17153051       | 17153051     | T               | A            |
| ESCC-F2    | exonic            | <i>MK167</i>                                                                                               | nonsynonymous SNV    | NM_001145966:c.C2579G;p.A860G   |                                | chr10 | 129906445      | 129906445    | G               | C            |
| ESCC-F2    | exonic            | <i>KLHL1</i>                                                                                               | nonsynonymous SNV    | NM_020866:c.G1966C;p.D656H      |                                | chr13 | 70293550       | 70293550     | C               | G            |
| ESCC-F2    | exonic            | <i>PALB2</i>                                                                                               | nonsynonymous SNV    | NM_024675:c.C1403T;p.T468I      |                                | chr16 | 23646464       | 23646464     | G               | A            |
| ESCC-F2    | exonic            | <i>NLRP1</i>                                                                                               | nonsynonymous SNV    | NM_001033053:c.G2215A;p.E739K   |                                | chr17 | 5461801        | 5461801      | C               | T            |
| ESCC-F2    | exonic            | <i>TP53</i>                                                                                                | nonsynonymous SNV    | NM_001126115:c.G131T;p.C44F     | 722046;905938;907276;909707;90 | chr17 | 7578403        | 7578403      | C               | A            |
| ESCC-F2    | exonic            | <i>DNAH9</i>                                                                                               | stopgain SNV         | NM_001372:c.C3169T;p.Q1057X     |                                | chr17 | 11572927       | 11572927     | C               | T            |
| ESCC-F2    | exonic            | <i>ZNF207</i>                                                                                              | nonsynonymous SNV    | NM_001032293:c.C1117T;p.R373W   |                                | chr17 | 30696359       | 30696359     | C               | T            |
| ESCC-F2    | exonic            | <i>PHOX2B</i>                                                                                              | nonsynonymous SNV    | NM_003924:c.G352A;p.A118T       |                                | chr4  | 41749443       | 41749443     | C               | T            |
| ESCC-F2    | exonic            | <i>GRIA2</i>                                                                                               | nonsynonymous SNV    | NM_000826:c.C1858A;p.R620S      |                                | chr4  | 158262429      | 158262429    | C               | A            |
| ESCC-F2    | exonic            | <i>KIAA0947</i>                                                                                            | nonsynonymous SNV    | NM_015325:c.C3318G;p.D1106E     |                                | chr5  | 5462765        | 5462765      | C               | G            |
| ESCC-F2    | exonic            | <i>DNAH5</i>                                                                                               | nonsynonymous SNV    | NM_001369:c.C10760A;p.S3587Y    |                                | chr5  | 13753454       | 13753454     | G               | T            |
| ESCC-F2    | exonic            | <i>TRIO</i>                                                                                                | nonsynonymous SNV    | NM_007118:c.G5567C;p.G1856A     |                                | chr5  | 14462934       | 14462934     | G               | C            |
| ESCC-F2    | exonic            | <i>ZNF391</i>                                                                                              | nonsynonymous SNV    | NM_001076781:c.G880C;p.E294Q    |                                | chr6  | 27369029       | 27369029     | G               | C            |
| ESCC-F2    | exonic            | <i>CLIC5</i>                                                                                               | nonsynonymous SNV    | NM_001114086:c.C659A;p.A220D    |                                | chr6  | 45917110       | 45917110     | G               | T            |
| ESCC-F2    | exonic            | <i>ABCA13</i>                                                                                              | frameshift deletion  | NM_152701:c.1591delC;p.L531fs   |                                | chr7  | 48285559       | 48285559     | C               | -            |
| ESCC-F2    | exonic            | <i>PAX5</i>                                                                                                | nonsynonymous SNV    | NM_016734:c.C310T;p.R104C       |                                | chr9  | 37015094       | 37015094     | G               | A            |
| ESCC-F3    | exonic            | <i>OR2W5</i>                                                                                               | nonsynonymous SNV    | NM_001004698:c.G104C;p.C35S     |                                | chr1  | 24765433       | 24765433     | G               | C            |
| ESCC-F3    | exonic            | <i>SYNE2</i>                                                                                               | nonsynonymous SNV    | NM_015180:c.G1107A;p.E3673K     |                                | chr14 | 64542813       | 64542813     | G               | A            |
| ESCC-F3    | exonic            | <i>MUC16</i>                                                                                               | nonsynonymous SNV    | NM_024690:c.A3144T;p.T10483S    |                                | chr19 | 9050184        | 9050184      | T               | A            |
| ESCC-F3    | exonic            | <i>LTN1</i>                                                                                                | nonsynonymous SNV    | NM_015565:c.G335T;p.R112L       |                                | chr21 | 30359101       | 30359101     | C               | A            |
| ESCC-F3    | exonic            | <i>BDP1</i>                                                                                                | nonsynonymous SNV    | NM_018429:c.G6371C;p.S2124T     |                                | chr5  | 70838051       | 70838051     | G               | C            |
| ESCC-F3    | exonic            | <i>DMXL1</i>                                                                                               | nonsynonymous SNV    | NM_005509:c.A859G;p.T287A       |                                | chr5  | 118454625      | 118454625    | A               | G            |
| ESCC-F3    | exonic            | <i>DMXL1</i>                                                                                               | nonsynonymous SNV    | NM_005509:c.C860A;p.T287N       |                                | chr5  | 118454626      | 118454626    | C               | A            |
| ESCC-F3    | exonic            | <i>ABC11</i>                                                                                               | nonsynonymous SNV    | NM_000927:c.T2330G;p.F777C      |                                | chr7  | 87168651       | 87168651     | A               | C            |
| ESCC-F3    | exonic            | <i>MUC17</i>                                                                                               | nonsynonymous SNV    | NM_001040105:c.C10727G;p.S3576C |                                | chr7  | 100685424      | 100685424    | C               | G            |
| ESCC-F3    | exonic            | <i>ZFX4</i>                                                                                                | nonsynonymous SNV    | NM_024721:c.C10574T;p.S3525F    |                                | chr8  | 77776524       | 77776524     | C               | T            |
| ESCC-F4    | exonic            | <i>PGM2L1</i>                                                                                              | nonsynonymous SNV    | NM_173582:c.C526T;p.H176Y       |                                | chr11 | 74079566       | 74079566     | G               | A            |
| ESCC-F4    | exonic            | <i>RB1</i>                                                                                                 | stopgain SNV         | NM_000321:c.C1363T;p.R455X      | 687562;808442;808520;808536;80 | chr13 | 48953760       | 48953760     | C               | T            |
| ESCC-F4    | exonic            | <i>MUC16</i>                                                                                               | nonsynonymous SNV    | NM_024690:c.G2546T;p.M8487I     |                                | chr19 | 9061985        | 9061985      | C               | A            |
| ESCC-F4    | exonic            | <i>ANKIB1</i>                                                                                              | nonsynonymous SNV    | NM_019004:c.C2172G;p.F724L      |                                | chr7  | 92020599       | 92020599     | C               | G            |
| ESCC-F4    | exonic            | <i>ABCB4</i>                                                                                               | frameshift insertion | NM_000443:c.101_102insA;p.T34fs |                                | chr7  | 87101971       | 87101971     | -               | T            |
| ESCC-F4    | exonic            | <i>TFEC</i>                                                                                                | nonsynonymous SNV    | NM_001018058:c.A166G;p.N56D     |                                | chr7  | 115624330      | 115624330    | T               | C            |

|          |                 |                                                |                        |                                           |                                |       |           |           |   |     |
|----------|-----------------|------------------------------------------------|------------------------|-------------------------------------------|--------------------------------|-------|-----------|-----------|---|-----|
| ESCC-F4  | exonic          | <i>CSMD3</i>                                   | nonsynonymous SNV      | NM_052900:c.A6572C:p.Y2191S               |                                | chr8  | 113349016 | 113349016 | T | G   |
| ESCC-F4  | exonic          | <i>CSMD3</i>                                   | nonsynonymous SNV      | NM_198123:c.C1267A:p.Q423K                |                                | chr8  | 113988141 | 113988141 | G | T   |
| ESCC-F5  | splicing        | <i>AKAP6</i>                                   |                        |                                           |                                | chr14 | 33294020  | 33294020  | A | T   |
| ESCC-F5  | exonic          | <i>ZNF750</i>                                  | stopgain SNV           | NM_024702:c.C777A:p.Y259X                 |                                | chr17 | 80789554  | 80789554  | G | T   |
| ESCC-F5  | exonic          | <i>DDX1</i>                                    | nonsynonymous SNV      | NM_004939:c.T442A:p.W148R                 |                                | chr2  | 15743366  | 15743366  | G | A   |
| ESCC-F5  | exonic          | <i>EFEMP1</i>                                  | nonsynonymous SNV      | NM_001039349:c.C542T:p.T181M              |                                | chr2  | 56108845  | 56108845  | G | A   |
| ESCC-F5  | exonic          | <i>TFN</i>                                     | nonsynonymous SNV      | NM_003319:c.C22245A:p.S7415R              |                                | chr2  | 179478570 | 179478570 | G | T   |
| ESCC-F5  | exonic          | <i>SF3B1</i>                                   | nonsynonymous SNV      | NM_012433:c.A2822G:p.N941S                |                                | chr2  | 198265055 | 198265055 | T | C   |
| ESCC-F5  | exonic          | <i>TIPARP</i>                                  | nonsynonymous SNV      | NM_001184717:c.A177G:p.I59M               |                                | chr3  | 156395663 | 156395663 | A | G   |
| ESCC-F5  | exonic          | <i>FAT1</i>                                    | nonsynonymous SNV      | NM_005245:c.A1030T:p.N3434I               |                                | chr4  | 187527273 | 187527273 | T | A   |
| ESCC-F5  | exonic          | <i>FBN2</i>                                    | nonsynonymous SNV      | NM_001999:c.C764A:p.P255Q                 |                                | chr5  | 127800479 | 127800479 | G | T   |
| ESCC-F5  | exonic          | <i>KIF4B</i>                                   | nonsynonymous SNV      | NM_001099293:c.C1211A:p.P374H             |                                | chr5  | 154394540 | 154394540 | C | A   |
| ESCC-F5  | exonic          | <i>IAMA4</i>                                   | nonsynonymous SNV      | NM_001105206:c.A2825G:p.H942R             |                                | chr6  | 112462113 | 112462113 | T | C   |
| ESCC-F5  | exonic          | <i>ZNF716</i>                                  | stopgain SNV           | NM_001159279:c.T987A:p.C329X              |                                | chr7  | 57529154  | 57529154  | T | A   |
| ESCC-F6  | exonic          | <i>BRP1</i>                                    | nonsynonymous SNV      | NM_032043:c.A3515C:p.E1172A               |                                | chr17 | 59760892  | 59760892  | T | G   |
| ESCC-F6  | exonic          | <i>IFT172</i>                                  | nonsynonymous SNV      | NM_015662:c.G3124A:p.E1042K               |                                | chr2  | 27680610  | 27680610  | C | T   |
| ESCC-F6  | exonic          | <i>MARCKL1</i>                                 | frameshift deletion    | NM_020814:c.794delG:p.R265fs              |                                | chr2  | 217142466 | 217142466 | - | -   |
| ESCC-F6  | exonic          | <i>MCM3AP</i>                                  | nonsynonymous SNV      | NM_003906:c.C80G:p.S27C                   |                                | chr21 | 47705121  | 47705121  | G | C   |
| ESCC-F6  | exonic          | <i>FANCD2</i>                                  | nonsynonymous SNV      | NM_001018115:c.C1876G:p.Q626E             |                                | chr3  | 10105524  | 10105524  | C | G   |
| ESCC-F6  | exonic          | <i>GRIK2</i>                                   | nonsynonymous SNV      | NM_001166247:c.A1583C:p.D528A             |                                | chr6  | 102337573 | 102337573 | A | C   |
| ESCC-F6  | exonic          | <i>ATRX</i>                                    | nonsynonymous SNV      | NM_000489:c.C55T:p.H19Y                   |                                | chrX  | 76972686  | 76972686  | G | A   |
| ESCC-F6  | exonic          | <i>BCORL1</i>                                  | nonsynonymous SNV      | NM_021946:c.C613G:p.P205A                 |                                | chrX  | 129147361 | 129147361 | C | G   |
| ESCC-F7  | exonic          | <i>DIAPH3</i>                                  | nonsynonymous SNV      | NM_030932:c.A1902G:p.I634M                |                                | chr13 | 60435587  | 60435587  | T | C   |
| ESCC-F7  | exonic          | <i>BUB1B</i>                                   | nonsynonymous SNV      | NM_001211:c.C2713G:p.Q905E                |                                | chr15 | 40509731  | 40509731  | C | G   |
| ESCC-F7  | exonic          | <i>TP53</i>                                    | frameshift insertion   | NM_001126118:c.254_255insT:p.C85fs        | 905938:907276:909707:946371:13 | chr17 | 7579316   | 7579316   | A | A   |
| ESCC-F7  | exonic          | <i>ADD1</i>                                    | nonsynonymous SNV      | NM_001119:c.A664T:p.T222S                 |                                | chr4  | 2896381   | 2896381   | A | T   |
| ESCC-F7  | exonic          | <i>GPR98</i>                                   | nonsynonymous SNV      | NM_032119:c.C2837G:p.T946S                |                                | chr5  | 89940625  | 89940625  | C | G   |
| ESCC-F7  | exonic          | <i>ZNF107</i>                                  | nonsynonymous SNV      | NM_001013746:c.G1327A:p.E443K             |                                | chr7  | 64168009  | 64168009  | G | A   |
| ESCC-F7  | exonic          | <i>PTCH1</i>                                   | frameshift insertion   | NM_000264:c.1895_1896insG:p.D632fs        |                                | chr9  | 98231388  | 98231388  | - | C   |
| ESCC-F8  | exonic          | <i>COL11A1</i>                                 | nonsynonymous SNV      | NM_001190709:c.G439T:p.A147S              |                                | chr1  | 103544263 | 103544263 | C | A   |
| ESCC-F8  | exonic          | <i>TTN</i>                                     | nonsynonymous SNV      | NM_003319:c.A19207C:p.K6403Q              |                                | chr2  | 179484742 | 179484742 | T | G   |
| ESCC-F8  | exonic          | <i>KIAA1109</i>                                | nonsynonymous SNV      | NM_015312:c.C4723T:p.L1575F               |                                | chr4  | 123164204 | 123164204 | C | T   |
| ESCC-F8  | exonic          | <i>CMYA5</i>                                   | nonsynonymous SNV      | NM_153610:c.A3263T:p.E1088V               |                                | chr5  | 79027851  | 79027851  | A | T   |
| ESCC-F8  | exonic          | <i>FANCF</i>                                   | nonsynonymous SNV      | NM_021922:c.A1540G:p.M514V                |                                | chr6  | 35434051  | 35434051  | A | G   |
| ESCC-F9  | exonic          | <i>PRDM2</i>                                   | nonsynonymous SNV      | NM_001007257:c.A3272G:p.N1091S            |                                | chr1  | 14108165  | 14108165  | A | G   |
| ESCC-F9  | splicing        | <i>NOTCH2(NM_024408:exon29;c.5003-1G&gt;T)</i> |                        |                                           |                                | chr1  | 120465070 | 120465070 | C | A   |
| ESCC-F9  | exonic          | <i>ZNF215</i>                                  | nonsynonymous SNV      | NM_013250:c.C1259A:p.T420K                |                                | chr11 | 6977467   | 6977467   | C | A   |
| ESCC-F9  | exonic          | <i>MLL2</i>                                    | frameshift deletion    | NM_003482:c.I651delG:p.E5506fs            |                                | chr12 | 49415831  | 49415831  | - | -   |
| ESCC-F9  | exonic          | <i>TP53</i>                                    | nonsynonymous SNV      | NM_001126115:c.C59T:p.P20L                | 905938:906867:907055:907276:90 | chr17 | 7578475   | 7578475   | G | A   |
| ESCC-F9  | exonic          | <i>MUC16</i>                                   | nonsynonymous SNV      | NM_024690:c.C16325A:p.A5442D              |                                | chr19 | 9071121   | 9071121   | G | T   |
| ESCC-F9  | exonic          | <i>GRM3</i>                                    | nonsynonymous SNV      | NM_000840:c.G1563A:p.M521I                |                                | chr7  | 86468393  | 86468393  | G | A   |
| ESCC-F10 | exonic          | <i>LRR1Q3</i>                                  | nonsynonymous SNV      | NM_001105659:c.T1756A:p.F586I             |                                | chr1  | 74492616  | 74492616  | A | T   |
| ESCC-F10 | exonic          | <i>USH2A</i>                                   | nonsynonymous SNV      | NM_206933:c.G1031T:p.K3437N               |                                | chr1  | 215960088 | 215960088 | C | A   |
| ESCC-F10 | exonic          | <i>NRAP</i>                                    | nonsynonymous SNV      | NM_006175:c.G1444C:p.E482Q                |                                | chr10 | 115392926 | 115392926 | C | G   |
| ESCC-F10 | exonic          | <i>DNAH10</i>                                  | nonsynonymous SNV      | NM_207437:c.G8986A:p.V2996I               |                                | chr12 | 124382376 | 124382376 | G | A   |
| ESCC-F10 | exonic          | <i>TP53</i>                                    | stopgain SNV           | NM_001126115:c.G463T:p.E155X              | 753566:905938:907276:909707:91 | chr17 | 7577079   | 7577079   | C | A   |
| ESCC-F10 | exonic          | <i>C18orf34</i>                                | nonsynonymous SNV      | NM_001105528:c.T1827A:p.N609K             |                                | chr18 | 30803175  | 30803175  | A | T   |
| ESCC-F10 | exonic          | <i>ZNF729</i>                                  | nonsynonymous SNV      | NM_001242680:c.A2779C:p.K927Q             |                                | chr19 | 22498998  | 22498998  | A | C   |
| ESCC-F10 | exonic          | <i>TTN</i>                                     | nonsynonymous SNV      | NM_003319:c.C1115T:p.T372I                |                                | chr2  | 179659779 | 179659779 | G | A   |
| ESCC-F10 | exonic          | <i>DNAH7</i>                                   | nonsynonymous SNV      | NM_018897:c.C8396A:p.A2799E               |                                | chr2  | 196722119 | 196722119 | G | T   |
| ESCC-F10 | exonic          | <i>U2AF1</i>                                   | nonsynonymous SNV      | NM_001025203:c.G626A:p.R209H              |                                | chr21 | 44513309  | 44513309  | C | T   |
| ESCC-F10 | exonic          | <i>PIK3CA</i>                                  | nonsynonymous SNV      | NM_006218:c.A3127G:p.M1043V               | 904439:1018677:1046072:1097410 | chr3  | 178952072 | 178952072 | A | G   |
| ESCC-F10 | exonic;splicing | <i>CTSO;CTSO</i>                               | nonsynonymous SNV      | NM_001334:c.G931A:p.G311S                 |                                | chr4  | 156849488 | 156849488 | C | T   |
| ESCC-F10 | exonic          | <i>SPEF2</i>                                   | nonsynonymous SNV      | NM_024867:c.G136A:p.D46N                  |                                | chr5  | 35628639  | 35628639  | G | A   |
| ESCC-F10 | exonic          | <i>FBN2</i>                                    | nonsynonymous SNV      | NM_001999:c.A5050G:p.S1684G               |                                | chr5  | 127647016 | 127647016 | T | C   |
| ESCC-F10 | exonic          | <i>FAT2</i>                                    | nonsynonymous SNV      | NM_001447:c.C8008G:p.H2670D               |                                | chr5  | 150922680 | 150922680 | G | C   |
| ESCC-F10 | exonic          | <i>HIST1HE2AJ</i>                              | nonsynonymous SNV      | NM_021066:c.G378C:p.K126N                 |                                | chr6  | 27782141  | 27782141  | C | G   |
| ESCC-F10 | exonic          | <i>GCLC</i>                                    | nonsynonymous SNV      | NM_001197115:c.C75G:p.H25Q                |                                | chr6  | 53409369  | 53409369  | G | C   |
| ESCC-F10 | exonic          | <i>ABCA13</i>                                  | stopgain SNV           | NM_152701:c.C8771G:p.S2924X               |                                | chr7  | 48320984  | 48320984  | C | G   |
| ESCC-F10 | exonic          | <i>MUC17</i>                                   | nonsynonymous SNV      | NM_001040105:c.G12437A:p.R4146H           |                                | chr7  | 100691298 | 100691298 | G | A   |
| ESCC-F10 | exonic          | <i>HUWE1</i>                                   | nonsynonymous SNV      | NM_031407:c.G11317C:p.D3773H              |                                | chrX  | 53570864  | 53570864  | C | G   |
| ESCC-F11 | exonic          | <i>PTEN</i>                                    | nonsynonymous SNV      | NM_000314:c.C424G:p.R142G                 | 687563:713885:724838:753565:75 | chr10 | 89692940  | 89692940  | C | G   |
| ESCC-F11 | exonic          | <i>MUC2</i>                                    | nonsynonymous SNV      | NM_002457:c.C1559T:p.S520F                |                                | chr11 | 1081541   | 1081541   | C | T   |
| ESCC-F11 | exonic          | <i>MLL2</i>                                    | stopgain SNV           | NM_003482:c.C1196T:p.Q3988X               | 1636674                        | chr12 | 49426526  | 49426526  | G | A   |
| ESCC-F11 | exonic          | <i>MLL2</i>                                    | nonsynonymous SNV      | NM_003482:c.C10305G:p.I3435M              | 1636677                        | chr12 | 49428645  | 49428645  | G | C   |
| ESCC-F11 | exonic          | <i>NAV3</i>                                    | nonsynonymous SNV      | NM_014903:c.G6193T:p.A2065S               |                                | chr12 | 78583967  | 78583967  | G | T   |
| ESCC-F11 | exonic          | <i>BAZ1A</i>                                   | nonsynonymous SNV      | NM_182648:c.C2471T:p.S824F                |                                | chr14 | 35245391  | 35245391  | G | A   |
| ESCC-F11 | exonic          | <i>SYNE2</i>                                   | nonframeshift deletion | NM_015180:c.14961_14963del:p.4987_4988del |                                | chr14 | 64606776  | 64606776  | - | CAT |
| ESCC-F11 | exonic          | <i>YSK4</i>                                    | stopgain SNV           | NM_025052:c.C1069T:p.R357X                |                                | chr2  | 135745373 | 135745373 | G | A   |
| ESCC-F11 | exonic          | <i>TTN</i>                                     | nonsynonymous SNV      | NM_133378:c.C14736A:p.F4912L              |                                | chr2  | 179594512 | 179594512 | G | T   |
| ESCC-F11 | exonic          | <i>TTN</i>                                     | nonsynonymous SNV      | NM_133378:c.C11488T:p.P3830S              |                                | chr2  | 179599331 | 179599331 | G | A   |



|          |                 |                                                                                                                                               |                      |                                          |                                |       |           |           |      |    |
|----------|-----------------|-----------------------------------------------------------------------------------------------------------------------------------------------|----------------------|------------------------------------------|--------------------------------|-------|-----------|-----------|------|----|
| ESCC-F11 | exonic          | <i>SMARCB1</i>                                                                                                                                | nonsynonymous SNV    | NM_001007468:c.G685A:p.A229T             | 802126;1197636;1475169;1475190 | chr22 | 24159040  | 24159040  | G    | A  |
| ESCC-F11 | exonic          | <i>SI</i>                                                                                                                                     | nonsynonymous SNV    | NM_001041:c.C5431A:p.L181M               |                                | chr3  | 164697203 | 164697203 | G    | T  |
| ESCC-F11 | exonic          | <i>BRAF</i>                                                                                                                                   | stopgain SNV         | NM_004333:c.C1525T:p.R509X               |                                | chr7  | 140476881 | 140476881 | G    | A  |
| ESCC-F11 | exonic          | <i>ADCY8</i>                                                                                                                                  | nonsynonymous SNV    | NM_001115:c.T1148C:p.V383A               |                                | chr8  | 131964207 | 131964207 | A    | G  |
| ESCC-F11 | exonic          | <i>NOTCH1</i>                                                                                                                                 | stopgain SNV         | NM_017617:c.C1986G:p.Y62X                |                                | chr9  | 139409770 | 139409770 | G    | C  |
| ESCC-F12 | exonic          | <i>FGFR2</i>                                                                                                                                  | nonsynonymous SNV    | NM_001144914:c.C1438G:p.R480G            |                                | chr10 | 123256135 | 123256135 | G    | C  |
| ESCC-F12 | exonic          | <i>NPAS4</i>                                                                                                                                  | nonsynonymous SNV    | NM_178864:c.C1775T:p.A592V               |                                | chr11 | 66192136  | 66192136  | C    | T  |
| ESCC-F12 | exonic          | <i>LRP1</i>                                                                                                                                   | nonsynonymous SNV    | NM_002332:c.C3771A:p.D1257E              |                                | chr12 | 57569466  | 57569466  | C    | A  |
| ESCC-F12 | exonic          | <i>TP53</i>                                                                                                                                   | nonsynonymous SNV    | NM_001126115:c.A349T:p.R117W             | 905938;907276;909707;909711;91 | chr17 | 7577536   | 7577536   | T    | A  |
| ESCC-F12 | exonic          | <i>NFE2L2</i>                                                                                                                                 | nonsynonymous SNV    | NM_001145412:c.C52G:p.R18K               | 1571458;1579693;1604883        | chr2  | 178098945 | 178098945 | G    | C  |
| ESCC-F12 | exonic          | <i>TNF</i>                                                                                                                                    | nonsynonymous SNV    | NM_003319:c.G5311A:p.E1771G              |                                | chr2  | 179641142 | 179641142 | C    | T  |
| ESCC-F12 | exonic          | <i>CHEK2</i>                                                                                                                                  | nonsynonymous SNV    | NM_007194:c.G808A:p.V270I                |                                | chr22 | 29106032  | 29106032  | C    | T  |
| ESCC-F12 | exonic          | <i>TRPC3</i>                                                                                                                                  | nonsynonymous SNV    | NM_003305:c.T877A:p.S293T                |                                | chr4  | 122846253 | 122846253 | A    | T  |
| ESCC-F12 | exonic;splicing | <i>ECT2L;ECT2L</i>                                                                                                                            | nonsynonymous SNV    | NM_001195037:c.G1198A:p.E400K            |                                | chr6  | 139175291 | 139175291 | G    | A  |
| ESCC-F12 | exonic          | <i>MGAM</i>                                                                                                                                   | nonsynonymous SNV    | NM_004668:c.C2443T:p.L815F               |                                | chr7  | 141740591 | 141740591 | C    | T  |
| ESCC-F12 | exonic          | <i>FZD6</i>                                                                                                                                   | nonsynonymous SNV    | NM_001164615:c.G313C:p.D105H             |                                | chr8  | 104330953 | 104330953 | G    | C  |
| ESCC-F12 | exonic          | <i>CSMD3</i>                                                                                                                                  | stopgain SNV         | NM_052900:c.C5219A:p.S1740X              |                                | chr8  | 113420621 | 113420621 | G    | T  |
| ESCC-F12 | exonic          | <i>FAM135B</i>                                                                                                                                | nonsynonymous SNV    | NM_015912:c.A3247T:p.T1083S              |                                | chr8  | 139163471 | 139163471 | T    | A  |
| ESCC-F13 | exonic          | <i>JAK1</i>                                                                                                                                   | nonsynonymous SNV    | NM_002227:c.T1087C:p.W363R               |                                | chr1  | 65330559  | 65330559  | A    | G  |
| ESCC-F13 | exonic;splicing | <i>HMCN1;HMCN1</i>                                                                                                                            | stopgain SNV         | NM_031935:c.A11275T:p.R3759X             |                                | chr1  | 186083254 | 186083254 | A    | T  |
| ESCC-F13 | exonic          | <i>POLR3A</i>                                                                                                                                 | stopgain SNV         | NM_007055:c.C1852T:p.R618X               |                                | chr10 | 79769352  | 79769352  | G    | A  |
| ESCC-F13 | exonic          | <i>TP53</i>                                                                                                                                   | frameshift deletion  | NM_001126115:c.S09_512del;p.L170_171del  | 753566;905938;907276;909707;91 | chr17 | 7577030   | 7577030   | CTCC | -  |
| ESCC-F13 | exonic          | <i>SH3YL1</i>                                                                                                                                 | nonsynonymous SNV    | NM_001159597:c.G91A:p.G31R               |                                | chr2  | 253026    | 253026    | C    | T  |
| ESCC-F13 | exonic          | <i>LRP1B</i>                                                                                                                                  | nonsynonymous SNV    | NM_018577:c.G12431A:p.G4144D             |                                | chr2  | 141081545 | 141081545 | C    | T  |
| ESCC-F13 | exonic          | <i>SHROOM3</i>                                                                                                                                | nonsynonymous SNV    | NM_020859:c.G827T:p.G276V                |                                | chr4  | 77660153  | 77660153  | G    | T  |
| ESCC-F13 | exonic          | <i>PTPN13</i>                                                                                                                                 | stopgain SNV         | NM_080684:c.C6871T:p.Q2291X              |                                | chr4  | 87735690  | 87735690  | C    | T  |
| ESCC-F13 | exonic          | <i>ANKRD50</i>                                                                                                                                | nonsynonymous SNV    | NM_001167882:c.G2713T:p.V905F            |                                | chr4  | 125591182 | 125591182 | C    | A  |
| ESCC-F13 | exonic          | <i>ABCA13</i>                                                                                                                                 | nonsynonymous SNV    | NM_152701:c.C4544G:p.S1515C              |                                | chr7  | 48313807  | 48313807  | C    | G  |
| ESCC-F13 | exonic          | <i>SOX3</i>                                                                                                                                   | nonsynonymous SNV    | NM_005634:c.C473G:p.A158G                |                                | chrX  | 139586753 | 139586753 | G    | C  |
| ESCC-F14 | exonic          | <i>MLL2</i>                                                                                                                                   | stopgain SNV         | NM_003482:c.C11737T:p.Q3913X             |                                | chr12 | 49426751  | 49426751  | G    | A  |
| ESCC-F14 | exonic          | <i>LRP1</i>                                                                                                                                   | nonsynonymous SNV    | NM_002332:c.A2783T:p.N928I               |                                | chr12 | 57559978  | 57559978  | A    | T  |
| ESCC-F14 | exonic          | <i>LRP1</i>                                                                                                                                   | nonsynonymous SNV    | NM_002332:c.A11744G:p.Y3915C             |                                | chr12 | 57600409  | 57600409  | A    | G  |
| ESCC-F14 | exonic          | <i>DNAH10</i>                                                                                                                                 | nonsynonymous SNV    | NM_207437:c.G12256C:p.E4086G             |                                | chr12 | 124414304 | 124414304 | G    | C  |
| ESCC-F14 | exonic          | <i>DNAH10</i>                                                                                                                                 | nonsynonymous SNV    | NM_207437:c.A13234T:p.I4412F             |                                | chr12 | 124419278 | 124419278 | A    | T  |
| ESCC-F14 | exonic          | <i>CHD2</i>                                                                                                                                   | stopgain SNV         | NM_001271:c.C4313G:p.S1438X              |                                | chr15 | 93547881  | 93547881  | C    | G  |
| ESCC-F14 | exonic          | <i>CRLF3</i>                                                                                                                                  | nonsynonymous SNV    | NM_015986:c.G43A:p.E15K                  |                                | chr17 | 29151627  | 29151627  | C    | T  |
| ESCC-F14 | exonic          | <i>TP53</i>                                                                                                                                   | frameshift insertion | NM_001126118:c.101_102msCG;p.V34fs       | 905938;907276;909707;946371;13 | chr17 | 7579469   | 7579469   | -    | CG |
| ESCC-F14 | exonic          | <i>CIC</i>                                                                                                                                    | nonsynonymous SNV    | NM_015125:c.A625T:p.L209F                |                                | chr19 | 42791739  | 42791739  | A    | T  |
| ESCC-F14 | exonic          | <i>TIN</i>                                                                                                                                    | nonsynonymous SNV    | NM_133378:c.A18658C:p.N6220H             |                                | chr2  | 179587124 | 179587124 | T    | G  |
| ESCC-F14 | exonic          | <i>XIRP2</i>                                                                                                                                  | frameshift insertion | NM_001199144:c.c.6723_6724insA;p.Q2241fs |                                | chr2  | 168105291 | 168105291 | -    | A  |
| ESCC-F14 | exonic          | <i>GOLGB1</i>                                                                                                                                 | nonsynonymous SNV    | NM_001256488:c.C1538T:p.A513V            |                                | chr3  | 121417592 | 121417592 | G    | A  |
| ESCC-F14 | exonic          | <i>PLXNA1</i>                                                                                                                                 | nonsynonymous SNV    | NM_032242:c.G3451A:p.V1151I              |                                | chr3  | 126736442 | 126736442 | G    | A  |
| ESCC-F14 | exonic          | <i>MUC4</i>                                                                                                                                   | nonsynonymous SNV    | NM_018406:c.C7226G:p.A2409G              |                                | chr3  | 195511225 | 195511225 | G    | C  |
| ESCC-F14 | exonic          | <i>TRPC3</i>                                                                                                                                  | stopgain SNV         | NM_003305:c.C2234G:p.S745X               |                                | chr4  | 122824017 | 122824017 | G    | C  |
| ESCC-F14 | exonic          | <i>ADAMTS12</i>                                                                                                                               | nonsynonymous SNV    | NM_030955:c.A2612G:p.N871S               |                                | chr5  | 33596081  | 33596081  | T    | C  |
| ESCC-F14 | exonic          | <i>SPEF2</i>                                                                                                                                  | nonsynonymous SNV    | NM_024867:c.C4414G:p.L1472V              |                                | chr5  | 35779415  | 35779415  | C    | G  |
| ESCC-F14 | exonic          | <i>C5orf42</i>                                                                                                                                | nonsynonymous SNV    | NM_023073:c.C6529T:p.P2177S              |                                | chr5  | 37169597  | 37169597  | G    | A  |
| ESCC-F14 | exonic          | <i>DSP</i>                                                                                                                                    | nonsynonymous SNV    | NM_001008844:c.C6707G:p.S2236C           |                                | chr6  | 7585999   | 7585999   | C    | G  |
| ESCC-F14 | exonic          | <i>DPCR1</i>                                                                                                                                  | stopgain SNV         | NM_080870:c.G2776T:p.E926X               |                                | chr6  | 30919017  | 30919017  | G    | T  |
| ESCC-F14 | exonic          | <i>ABCB5</i>                                                                                                                                  | stopgain SNV         | NM_178559:c.C1507T:p.R503X               |                                | chr7  | 20768053  | 20768053  | C    | T  |
| ESCC-F14 | exonic          | <i>RENBP</i>                                                                                                                                  | nonsynonymous SNV    | NM_002910:c.G836C:p.R279P                |                                | chrX  | 153207040 | 153207040 | G    | G  |
| ESCC-F15 | splicing        | <i>TP53(NM_001126117;exon2:c.163+1G&gt;A;NM_001126112;exon6:c.559+1G&gt;A;NM_001126116;exon2:c.163+1G&gt;A;NM_000546;exon6:c.559+1G&gt;A)</i> |                      |                                          | 905938;907276;907319;909707;90 | chr17 | 7578370   | 7578370   | C    | T  |
| ESCC-F15 | exonic          | <i>CCDC93</i>                                                                                                                                 | nonsynonymous SNV    | NM_019044:c.G1255C:p.E419Q               |                                | chr2  | 118704428 | 118704428 | C    | G  |
| ESCC-F15 | exonic          | <i>TIN</i>                                                                                                                                    | nonsynonymous SNV    | NM_003319:c.C1390G:p.Q464E               |                                | chr2  | 179659134 | 179659134 | G    | C  |
| ESCC-F15 | exonic          | <i>HIRA</i>                                                                                                                                   | nonsynonymous SNV    | NM_003325:c.T1382C:p.I461T               |                                | chr22 | 19371176  | 19371176  | A    | G  |
| ESCC-F15 | exonic          | <i>EP300</i>                                                                                                                                  | nonsynonymous SNV    | NM_001429:c.G4195A:p.D1399N              | 1523832;1560558                | chr22 | 41565529  | 41565529  | G    | A  |
| ESCC-F15 | exonic          | <i>FAT2</i>                                                                                                                                   | stopgain SNV         | NM_001447:c.C8155T:p.Q2719X              |                                | chr5  | 150922533 | 150922533 | G    | A  |
| ESCC-F15 | exonic          | <i>THSD7A</i>                                                                                                                                 | nonsynonymous SNV    | NM_015204:c.G2222A:p.R741Q               |                                | chr7  | 11513991  | 11513991  | C    | T  |
| ESCC-F15 | exonic          | <i>MLL3</i>                                                                                                                                   | nonsynonymous SNV    | NM_170606:c.G3745C:p.E1249Q              |                                | chr7  | 151904481 | 151904481 | C    | G  |
| ESCC-F15 | exonic          | <i>TRPM6</i>                                                                                                                                  | nonsynonymous SNV    | NM_001177310:c.G5362C:p.D1788H           |                                | chr9  | 77354749  | 77354749  | C    | G  |
| ESCC-F15 | exonic          | <i>DMD</i>                                                                                                                                    | nonsynonymous SNV    | NM_004011:c.G557A:p.R186H                |                                | chrX  | 32404521  | 32404521  | C    | A  |
| ESCC-F16 | exonic          | <i>MAB21L1</i>                                                                                                                                | nonsynonymous SNV    | NM_005584:c.C238T:p.L80F                 |                                | chr13 | 36050038  | 36050038  | G    | A  |
| ESCC-F16 | exonic          | <i>MYCBP2</i>                                                                                                                                 | stopgain SNV         | NM_015057:c.C2572T:p.R858X               |                                | chr13 | 77817251  | 77817251  | G    | A  |
| ESCC-F16 | exonic          | <i>SYNE2</i>                                                                                                                                  | nonsynonymous SNV    | NM_015180:c.C5371A:p.L1791I              |                                | chr14 | 64488593  | 64488593  | C    | A  |
| ESCC-F16 | exonic          | <i>APCDD1</i>                                                                                                                                 | nonsynonymous SNV    | NM_153000:c.C1092G:p.F364L               |                                | chr18 | 10485776  | 10485776  | C    | G  |
| ESCC-F16 | exonic          | <i>SPHKAP</i>                                                                                                                                 | nonsynonymous SNV    | NM_001142644:c.C1256A:p.A419E            |                                | chr2  | 228884314 | 228884314 | G    | T  |
| ESCC-F16 | exonic          | <i>SLCSA4</i>                                                                                                                                 | nonsynonymous SNV    | NM_014227:c.C970T:p.P324S                |                                | chr22 | 32628937  | 32628937  | G    | A  |
| ESCC-F16 | splicing        | <i>PLXNA4(NM_020911;exon19:c.3253+1G&gt;A)</i>                                                                                                |                      |                                          |                                | chr7  | 131866380 | 131866380 | C    | T  |
| ESCC-F16 | exonic          | <i>KDM6A</i>                                                                                                                                  | stopgain SNV         | NM_021140:c.C360G:p.Y120X                | 724870;749715;753568;753614;90 | chrX  | 44833936  | 44833936  | C    | G  |
| ESCC-F17 | exonic          | <i>LGR6</i>                                                                                                                                   | nonsynonymous SNV    | NM_001017404:c.T389A:p.I130N             |                                | chr1  | 20226997  | 20226997  | T    | A  |
| ESCC-F17 | exonic          | <i>LRRC4C</i>                                                                                                                                 | nonsynonymous SNV    | NM_020929:c.C518T:p.S173F                |                                | chr11 | 40137325  | 40137325  | G    | A  |

|          |          |                                               |                      |                                       |                                |       |           |           |    |   |
|----------|----------|-----------------------------------------------|----------------------|---------------------------------------|--------------------------------|-------|-----------|-----------|----|---|
| ESCC-F17 | exonic   | <i>ABHD13</i>                                 | nonsynonymous SNV    | NM_032859:c.C538A:p.P180T             |                                | chr13 | 108882104 | 108882104 | C  | A |
| ESCC-F17 | exonic   | <i>SECISBP2L</i>                              | nonsynonymous SNV    | NM_014701:c.G1746A:p.M582I            |                                | chr15 | 49301559  | 49301559  | C  | T |
| ESCC-F17 | exonic   | <i>TP53</i>                                   | nonsynonymous SNV    | NM_001126115:c.T38C:p.L13P            | 905938:905954:907276:909707:94 | chr17 | 7578496   | 7578496   | A  | G |
| ESCC-F17 | exonic   | <i>C5orf42</i>                                | nonsynonymous SNV    | NM_023073:c.C8291T:p.S2764F           |                                | chr5  | 37148291  | 37148291  | G  | A |
| ESCC-F17 | exonic   | <i>APC</i>                                    | nonsynonymous SNV    | NM_001127511:c.C2054T:p.A685V         | 1109799                        | chr5  | 112173399 | 112173399 | C  | T |
| ESCC-F17 | exonic   | <i>PCLO</i>                                   | nonsynonymous SNV    | NM_014510:c.C9652T:p.R3218C           |                                | chr7  | 82580252  | 82580252  | G  | A |
| ESCC-F17 | exonic   | <i>OXRI</i>                                   | nonsynonymous SNV    | NM_181354:c.G1480C:p.E494Q            |                                | chr8  | 107719250 | 107719250 | G  | C |
| ESCC-F17 | exonic   | <i>EPPK1</i>                                  | nonsynonymous SNV    | NM_031308:c.G6775T:p.A2259S           |                                | chr8  | 144940647 | 144940647 | C  | A |
| ESCC-F18 | exonic   | <i>ARID1A</i>                                 | nonsynonymous SNV    | NM_006015:c.G3496T:p.A1166S           |                                | chr1  | 27099080  | 27099080  | G  | T |
| ESCC-F18 | exonic   | <i>ATRNL1</i>                                 | nonsynonymous SNV    | NM_207303:c.C2475A:p.D825E            |                                | chr10 | 117059603 | 117059603 | C  | A |
| ESCC-F18 | exonic   | <i>MUC5B</i>                                  | nonsynonymous SNV    | NM_002458:c.C5228T:p.T17438C          |                                | chr11 | 1263338   | 1263338   | C  | T |
| ESCC-F18 | exonic   | <i>MLL2</i>                                   | frameshift deletion  | NM_003482:c.3156delC:p.P1052fs        |                                | chr12 | 49444215  | 49444215  | G  | - |
| ESCC-F18 | exonic   | <i>FLT1</i>                                   | stopgain SNV         | NM_001159920:c.G1972T:p.E658X         |                                | chr13 | 28963930  | 28963930  | C  | A |
| ESCC-F18 | exonic   | <i>TP53</i>                                   | nonsynonymous SNV    | NM_001126115:c.A218G:p.Y73C           | 905938:907276:908446:909707:94 | chr17 | 7578235   | 7578235   | T  | C |
| ESCC-F18 | exonic   | <i>TP53</i>                                   | nonsynonymous SNV    | NM_001126115:c.T130A:p.C44S           | 905938:907276:909707:909769:90 | chr17 | 7578404   | 7578404   | A  | T |
| ESCC-F18 | exonic   | <i>MYH13</i>                                  | nonsynonymous SNV    | NM_003802:c.G4157A:p.R1386H           |                                | chr17 | 10216499  | 10216499  | C  | T |
| ESCC-F18 | exonic   | <i>SPAT</i>                                   | frameshift deletion  | NM_199436:c.1087_1088del:p.363_363del |                                | chr2  | 32353486  | 32353487  | GT | - |
| ESCC-F18 | exonic   | <i>MATN4</i>                                  | nonsynonymous SNV    | NM_000383:c.C277T:p.R93C              |                                | chr20 | 43933234  | 43933234  | G  | A |
| ESCC-F18 | exonic   | <i>FBXW7</i>                                  | nonsynonymous SNV    | NM_001013415:c.C1159T:p.R387C         | 753548:906763:907272:907391:90 | chr4  | 153247289 | 153247289 | G  | A |
| ESCC-F18 | exonic   | <i>DSP</i>                                    | nonsynonymous SNV    | NM_001008844:c.G5168T:p.G1723V        |                                | chr6  | 7584460   | 7584460   | G  | T |
| ESCC-F18 | exonic   | <i>PTPRK</i>                                  | nonsynonymous SNV    | NM_001135648:c.G2233A:p.A745T         |                                | chr6  | 128330375 | 128330375 | C  | T |
| ESCC-F18 | exonic   | <i>SYNE1</i>                                  | nonsynonymous SNV    | NM_033071:c.C17567T:p.P5856L          |                                | chr6  | 152615165 | 152615165 | G  | A |
| ESCC-F18 | exonic   | <i>SYNE1</i>                                  | nonsynonymous SNV    | NM_033071:c.G14078A:p.R4693Q          |                                | chr6  | 152651529 | 152651529 | C  | T |
| ESCC-F18 | exonic   | <i>SYNE1</i>                                  | frameshift deletion  | NM_033071:c.12431delA:p.N4144fs       |                                | chr6  | 152655293 | 152655293 | T  | - |
| ESCC-F18 | exonic   | <i>PCLO</i>                                   | nonsynonymous SNV    | NM_014510:c.C800T:p.T267I             |                                | chr7  | 82785157  | 82785157  | G  | A |
| ESCC-F18 | exonic   | <i>WWC3</i>                                   | stopgain SNV         | NM_015691:c.C2836T:p.R946X            |                                | chrX  | 10104745  | 10104745  | C  | T |
| ESCC-F19 | exonic   | <i>CUBN</i>                                   | nonsynonymous SNV    | NM_001081:c.G4315C:p.E1439Q           |                                | chr10 | 17032368  | 17032368  | C  | G |
| ESCC-F19 | exonic   | <i>DNAH10</i>                                 | nonsynonymous SNV    | NM_207437:c.T12142A:p.F4048I          |                                | chr12 | 124414011 | 124414011 | T  | A |
| ESCC-F19 | exonic   | <i>RB1</i>                                    | nonsynonymous SNV    | NM_000321:c.C784T:p.R262W             | 687562:906844:907072:908123:90 | chr13 | 48937016  | 48937016  | C  | T |
| ESCC-F19 | exonic   | <i>DNAH9</i>                                  | nonsynonymous SNV    | NM_001372:c.T8860C:p.C2954R           |                                | chr17 | 11725764  | 11725764  | T  | C |
| ESCC-F19 | exonic   | <i>SH3YL1</i>                                 | nonsynonymous SNV    | NM_001159597:c.T923A:p.L308H          |                                | chr2  | 218860    | 218860    | A  | T |
| ESCC-F19 | exonic   | <i>SLC8A1</i>                                 | nonsynonymous SNV    | NM_001112800:c.T1596G:p.F532L         |                                | chr2  | 40655825  | 40655825  | A  | C |
| ESCC-F19 | exonic   | <i>LRP2</i>                                   | stopgain SNV         | NM_004525:c.C12193T:p.R4065X          |                                | chr2  | 170011072 | 170011072 | G  | A |
| ESCC-F19 | exonic   | <i>FASTKD1</i>                                | nonsynonymous SNV    | NM_024622:c.G1037T:p.G346V            |                                | chr2  | 170413742 | 170413742 | C  | A |
| ESCC-F19 | exonic   | <i>TTN</i>                                    | nonsynonymous SNV    | NM_003319:c.T68627C:p.L22876T         |                                | chr2  | 179409134 | 179409134 | A  | G |
| ESCC-F19 | exonic   | <i>SCN11A</i>                                 | nonsynonymous SNV    | NM_014139:c.G3177T:p.E1059D           |                                | chr3  | 38924766  | 38924766  | C  | A |
| ESCC-F19 | exonic   | <i>ATP10D</i>                                 | nonsynonymous SNV    | NM_020453:c.C122G:p.S41C              |                                | chr4  | 47514679  | 47514679  | C  | G |
| ESCC-F19 | exonic   | <i>HAND2</i>                                  | nonsynonymous SNV    | NM_021973:c.G480C:p.Q160H             |                                | chr4  | 174449961 | 174449961 | C  | G |
| ESCC-F19 | exonic   | <i>LAMA4</i>                                  | nonsynonymous SNV    | NM_001105206:c.G3033C:p.L1011F        |                                | chr6  | 112461031 | 112461031 | C  | G |
| ESCC-F19 | exonic   | <i>LAMA2</i>                                  | nonsynonymous SNV    | NM_000426:c.C4973G:p.T1658R           |                                | chr6  | 129704280 | 129704280 | C  | G |
| ESCC-F19 | exonic   | <i>CACNA1B</i>                                | nonsynonymous SNV    | NM_000718:c.C5641T:p.L1881F           |                                | chr9  | 141008934 | 141008934 | C  | T |
| ESCC-F20 | exonic   | <i>DIAPH3</i>                                 | nonsynonymous SNV    | NM_030932:c.G1444C:p.D482H            |                                | chr13 | 60490321  | 60490321  | C  | G |
| ESCC-F20 | exonic   | <i>UNC79</i>                                  | nonsynonymous SNV    | NM_020818:c.A5531T:p.E1844V           |                                | chr14 | 94109944  | 94109944  | A  | T |
| ESCC-F20 | exonic   | <i>NFAT5</i>                                  | nonsynonymous SNV    | NM_006599:c.G303T:p.K101N             |                                | chr16 | 69681034  | 69681034  | G  | T |
| ESCC-F20 | exonic   | <i>KCNJ12,KCNJ18</i>                          | nonsynonymous SNV    | NM_001194958:c.C1061T:p.T354M         |                                | chr17 | 21319715  | 21319715  | C  | T |
| ESCC-F20 | exonic   | <i>ABCA8</i>                                  | nonsynonymous SNV    | NM_007168:c.A3467G:p.D1156G           |                                | chr17 | 66880500  | 66880500  | T  | C |
| ESCC-F20 | exonic   | <i>COL4A4</i>                                 | nonsynonymous SNV    | NM_000092:c.C5020G:p.Q1674E           |                                | chr2  | 227872094 | 227872094 | G  | C |
| ESCC-F20 | exonic   | <i>FBXW7</i>                                  | stopgain SNV         | NM_001013415:c.C866A:p.S289X          | 906763                         | chr4  | 153250840 | 153250840 | G  | T |
| ESCC-F20 | exonic   | <i>FAT1</i>                                   | nonsynonymous SNV    | NM_005245:c.T4130A:p.I1377N           |                                | chr4  | 187557232 | 187557232 | A  | T |
| ESCC-F20 | exonic   | <i>FBN2</i>                                   | nonsynonymous SNV    | NM_001999:c.G860A:p.C287Y             |                                | chr5  | 127782266 | 127782266 | C  | T |
| ESCC-F20 | exonic   | <i>PCDHB15</i>                                | nonsynonymous SNV    | NM_018935:c.C2267T:p.T756M            |                                | chr5  | 140627413 | 140627413 | C  | T |
| ESCC-F20 | exonic   | <i>ABCA13</i>                                 | nonsynonymous SNV    | NM_152701:c.T7475A:p.L2492Q           |                                | chr7  | 48318266  | 48318266  | T  | A |
| ESCC-F20 | exonic   | <i>MGAM</i>                                   | nonsynonymous SNV    | NM_004668:c.C3910T:p.R1304C           |                                | chr7  | 141759362 | 141759362 | C  | T |
| ESCC-F20 | exonic   | <i>RP1</i>                                    | nonsynonymous SNV    | NM_006269:c.A5278C:p.N1760H           |                                | chr8  | 55541720  | 55541720  | A  | C |
| ESCC-F20 | exonic   | <i>DCAF4L2</i>                                | nonsynonymous SNV    | NM_152418:c.G434A:p.C145Y             |                                | chr8  | 88885766  | 88885766  | C  | T |
| ESCC-F20 | exonic   | <i>TSC1</i>                                   | nonsynonymous SNV    | NM_001162427:c.C863G:p.T288S          | 906827                         | chr9  | 135786853 | 135786853 | G  | C |
| ESCC-F21 | exonic   | <i>USH2A</i>                                  | nonsynonymous SNV    | NM_206933:c.A11975G:p.N3992S          |                                | chr1  | 215901463 | 215901463 | T  | C |
| ESCC-F21 | exonic   | <i>MUC2</i>                                   | nonsynonymous SNV    | NM_002457:c.C5111T:p.T1704I           |                                | chr11 | 1093292   | 1093292   | C  | T |
| ESCC-F21 | exonic   | <i>SNX32</i>                                  | nonsynonymous SNV    | NM_152760:c.G522C:p.R174S             |                                | chr11 | 65618245  | 65618245  | G  | C |
| ESCC-F21 | exonic   | <i>ARHGEF17</i>                               | nonsynonymous SNV    | NM_014786:c.G3408C:p.Q1136H           |                                | chr11 | 73064012  | 73064012  | G  | C |
| ESCC-F21 | exonic   | <i>MLL2</i>                                   | frameshift insertion | NM_003482:c.7522_7523insT:p.A2508fs   |                                | chr12 | 49434031  | 49434031  | -  | A |
| ESCC-F21 | exonic   | <i>TP53</i>                                   | stopgain SNV         | NM_000546:c.C112T:p.Q38X              | 905938:907276:909707:946371:13 | chr17 | 7579575   | 7579575   | G  | A |
| ESCC-F21 | exonic   | <i>DNMT1</i>                                  | nonsynonymous SNV    | NM_001379:c.C652A:p.P218T             |                                | chr19 | 10283834  | 10283834  | G  | T |
| ESCC-F21 | exonic   | <i>DNAH6</i>                                  | stopgain SNV         | NM_001370:c.G8173T:p.E2725X           |                                | chr2  | 84930630  | 84930630  | G  | T |
| ESCC-F21 | exonic   | <i>XIRP2</i>                                  | nonsynonymous SNV    | NM_001199144:c.A5171C:p.K1724T        |                                | chr2  | 168103739 | 168103739 | A  | C |
| ESCC-F21 | exonic   | <i>SF3A1</i>                                  | nonsynonymous SNV    | NM_001005409:c.G796A:p.E266K          |                                | chr22 | 30737761  | 30737761  | C  | T |
| ESCC-F21 | splicing | <i>EP300(NM_001429:exon22:c.3806+1G&gt;A)</i> |                      |                                       |                                | chr22 | 41560135  | 41560135  | G  | A |
| ESCC-F21 | exonic   | <i>POLQ</i>                                   | nonsynonymous SNV    | NM_199420:c.A4964G:p.N1655S           |                                | chr3  | 121206814 | 121206814 | T  | C |
| ESCC-F21 | exonic   | <i>TRIO</i>                                   | nonsynonymous SNV    | NM_007118:c.G2779C:p.E927Q            |                                | chr5  | 14366993  | 14366993  | G  | C |
| ESCC-F21 | exonic   | <i>GRIK2</i>                                  | nonsynonymous SNV    | NM_001166247:c.A1986T:p.E662D         |                                | chr6  | 102376408 | 102376408 | A  | T |
| ESCC-F21 | exonic   | <i>SYNE1</i>                                  | nonsynonymous SNV    | NM_033071:c.A4339G:p.T1447A           |                                | chr6  | 152755073 | 152755073 | T  | C |

|          |          |                                                                                                                                               |                        |                                      |                                |       |           |           |     |    |
|----------|----------|-----------------------------------------------------------------------------------------------------------------------------------------------|------------------------|--------------------------------------|--------------------------------|-------|-----------|-----------|-----|----|
| ESCC-F21 | exonic   | <i>MET</i>                                                                                                                                    | nonsynonymous SNV      | NM_000245:c.G2728C:p.E910Q           |                                | chr7  | 116409843 | 116409843 | G   | C  |
| ESCC-F21 | exonic   | <i>PLXNA4</i>                                                                                                                                 | stopgain SNV           | NM_181775:c.C1483T:p.Q495X           |                                | chr7  | 132169661 | 132169661 | G   | A  |
| ESCC-F21 | exonic   | <i>SLCO5A1</i>                                                                                                                                | nonsynonymous SNV      | NM_001146009:c.T2107C:p.Y703H        |                                | chr8  | 70585379  | 70585379  | A   | G  |
| ESCC-F22 | exonic   | <i>FPGT-TNNI3K,TNNI3</i>                                                                                                                      | nonsynonymous SNV      | NM_015978:c.C323A:p.A108E            |                                | chr1  | 74716443  | 74716443  | C   | A  |
| ESCC-F22 | exonic   | <i>PTEN</i>                                                                                                                                   | nonsynonymous SNV      | NM_000314:c.G407A:p.C136Y            | 687563;706236;713885;724838;73 | chr10 | 89692923  | 89692923  | G   | A  |
| ESCC-F22 | exonic   | <i>FAR2</i>                                                                                                                                   | nonsynonymous SNV      | NM_018099:c.C461T:p.A154V            |                                | chr12 | 29450049  | 29450049  | C   | T  |
| ESCC-F22 | exonic   | <i>MLL2</i>                                                                                                                                   | stopgain SNV           | NM_003482:c.C793T:p.R2645X           |                                | chr12 | 49433620  | 49433620  | G   | A  |
| ESCC-F22 | exonic   | <i>EPHA7</i>                                                                                                                                  | nonsynonymous SNV      | NM_004440:c.G2179T:p.D727Y           |                                | chr6  | 93965749  | 93965749  | C   | A  |
| ESCC-F22 | exonic   | <i>FAM48B2</i>                                                                                                                                | nonsynonymous SNV      | NM_001136233:c.C1903T:p.P635S        |                                | chrX  | 24329530  | 24329530  | G   | A  |
| ESCC-F22 | exonic   | <i>WNK3</i>                                                                                                                                   | nonsynonymous SNV      | NM_001002838:c.C3764T:p.S1255L       |                                | chrX  | 54264884  | 54264884  | G   | A  |
| ESCC-F23 | exonic   | <i>NAV1</i>                                                                                                                                   | nonsynonymous SNV      | NM_020443:c.G1174A:p.D392N           |                                | chr1  | 201687831 | 201687831 | G   | A  |
| ESCC-F23 | exonic   | <i>MUC2</i>                                                                                                                                   | nonsynonymous SNV      | NM_002457:c.C5111T:p.T1704I          |                                | chr11 | 1093292   | 1093292   | C   | T  |
| ESCC-F23 | exonic   | <i>CRBBP</i>                                                                                                                                  | nonsynonymous SNV      | NM_001079846:c.G6343A:p.G2115S       |                                | chr16 | 3778591   | 3778591   | C   | T  |
| ESCC-F23 | exonic   | <i>MC2R</i>                                                                                                                                   | nonsynonymous SNV      | NM_000529:c.G514A:p.V172M            |                                | chr18 | 13885004  | 13885004  | C   | T  |
| ESCC-F23 | exonic   | <i>FAT1</i>                                                                                                                                   | stopgain SNV           | NM_005245:c.C8176T:p.R2726X          |                                | chr4  | 187539564 | 187539564 | G   | A  |
| ESCC-F23 | exonic   | <i>FAM169A</i>                                                                                                                                | nonsynonymous SNV      | NM_015566:c.C1088T:p.T363I           |                                | chr5  | 74096720  | 74096720  | G   | A  |
| ESCC-F23 | exonic   | <i>WRN</i>                                                                                                                                    | nonsynonymous SNV      | NM_000553:c.C1475T:p.S492F           |                                | chr8  | 30945335  | 30945335  | C   | T  |
| ESCC-F24 | exonic   | <i>A2M</i>                                                                                                                                    | nonsynonymous SNV      | NM_000014:c.A2875T:p.M959L           |                                | chr12 | 9232391   | 9232391   | T   | A  |
| ESCC-F24 | exonic   | <i>ARID2</i>                                                                                                                                  | nonsynonymous SNV      | NM_152641:c.G3928C:p.G1310R          |                                | chr12 | 46245834  | 46245834  | G   | C  |
| ESCC-F24 | exonic   | <i>TP53:TP53</i>                                                                                                                              | frameshift insertion   | NM_001126115:c.522-523insCG:p.R174fs | 753566;905938;907276;909707;91 | chr17 | 7577020   | 7577020   | -   | CG |
| ESCC-F24 | exonic   | <i>LRP2</i>                                                                                                                                   | nonsynonymous SNV      | NM_004525:c.G13421A:p.G4474E         |                                | chr2  | 169995184 | 169995184 | C   | T  |
| ESCC-F24 | exonic   | <i>TTN</i>                                                                                                                                    | nonsynonymous SNV      | NM_133378:c.T25792A:p.Y8598N         |                                | chr2  | 179569981 | 179569981 | A   | T  |
| ESCC-F24 | exonic   | <i>NF2</i>                                                                                                                                    | nonframeshift deletion | NM_181830:c.176-178del:p.59-60del    | 907041;924108;1035318;103519   | chr22 | 30038252  | 30038254  | CTT | -  |
| ESCC-F24 | exonic   | <i>OR2B2</i>                                                                                                                                  | stopgain SNV           | NM_033057:c.G9A:p.W3X                |                                | chr6  | 27880089  | 27880089  | C   | T  |
| ESCC-F25 | exonic   | <i>NOTCH2</i>                                                                                                                                 | nonsynonymous SNV      | NM_001200001:c.T1079G:p.F360C        |                                | chr1  | 120512163 | 120512163 | A   | C  |
| ESCC-F25 | exonic   | <i>KLHL20</i>                                                                                                                                 | nonsynonymous SNV      | NM_014458:c.G405C:p.E135D            |                                | chr1  | 173703233 | 173703233 | G   | C  |
| ESCC-F25 | exonic   | <i>MLL2</i>                                                                                                                                   | nonsynonymous SNV      | NM_003482:c.C14166A:p.F4722L         |                                | chr12 | 49422929  | 49422929  | G   | T  |
| ESCC-F25 | exonic   | <i>TRHDE</i>                                                                                                                                  | nonsynonymous SNV      | NM_013381:c.A979T:p.M327L            |                                | chr12 | 72680660  | 72680660  | A   | T  |
| ESCC-F25 | exonic   | <i>NBEA</i>                                                                                                                                   | nonsynonymous SNV      | NM_015678:c.G5869C:p.G1957R          |                                | chr13 | 35883695  | 35883695  | G   | C  |
| ESCC-F25 | exonic   | <i>RB1</i>                                                                                                                                    | stopgain SNV           | NM_000321:c.A1285T:p.K429X           | 687562;906844;907072;908123;90 | chr13 | 48951123  | 48951123  | A   | T  |
| ESCC-F25 | splicing | <i>TP53(NM_001126117:exon3:c.276+2T&gt;C;NM_001126112:exon7:c.672+2T&gt;C;NM_001126116:exon3:c.276+2T&gt;C;NM_000546:exon7:c.672+2T&gt;C)</i> |                        |                                      | 905938;906826;907276;909707;94 | chr17 | 7578175   | 7578175   | A   | G  |
| ESCC-F25 | exonic   | <i>NF1</i>                                                                                                                                    | nonsynonymous SNV      | NM_000267:c.C5425T:p.R1809C          | 688087;724879;908135;908450;11 | chr17 | 29654736  | 29654736  | C   | T  |
| ESCC-F25 | exonic   | <i>MSH6</i>                                                                                                                                   | nonsynonymous SNV      | NM_000179:c.T1744C:p.F582L           | 753548                         | chr2  | 48026866  | 48026866  | T   | C  |
| ESCC-F25 | exonic   | <i>REL</i>                                                                                                                                    | nonsynonymous SNV      | NM_002908:c.A1630G:p.M544V           |                                | chr2  | 61149440  | 61149440  | A   | G  |
| ESCC-F25 | exonic   | <i>TTN</i>                                                                                                                                    | nonsynonymous SNV      | NM_003319:c.A50938C:p.I16980L        |                                | chr2  | 179432726 | 179432726 | T   | G  |
| ESCC-F25 | exonic   | <i>TTN</i>                                                                                                                                    | nonsynonymous SNV      | NM_003319:c.C24014A:p.P8005H         |                                | chr2  | 179475044 | 179475044 | G   | T  |
| ESCC-F25 | exonic   | <i>SSFA2</i>                                                                                                                                  | nonsynonymous SNV      | NM_001130445:c.C2003T:p.S668F        |                                | chr2  | 182780370 | 182780370 | C   | T  |
| ESCC-F25 | exonic   | <i>PWIL3</i>                                                                                                                                  | nonsynonymous SNV      | NM_001008496:c.G2080A:p.V694M        |                                | chr22 | 25121439  | 25121439  | C   | T  |
| ESCC-F25 | exonic   | <i>EP300</i>                                                                                                                                  | nonsynonymous SNV      | NM_001429:c.A758G:p.Y253C            |                                | chr22 | 41521896  | 41521896  | A   | G  |
| ESCC-F25 | exonic   | <i>CDH12</i>                                                                                                                                  | stopgain SNV           | NM_004061:c.C76T:p.Q26X              |                                | chr5  | 22078710  | 22078710  | G   | A  |
| ESCC-F25 | exonic   | <i>FAM184A</i>                                                                                                                                | nonsynonymous SNV      | NM_001100411:c.G2179T:p.A727S        |                                | chr6  | 119297126 | 119297126 | C   | A  |
| ESCC-F25 | exonic   | <i>LAMA2</i>                                                                                                                                  | nonsynonymous SNV      | NM_000426:c.G5202C:p.E1734D          |                                | chr6  | 129712766 | 129712766 | G   | C  |
| ESCC-F25 | exonic   | <i>SYNE1</i>                                                                                                                                  | nonsynonymous SNV      | NM_033071:c.G24622T:p.D8208Y         |                                | chr6  | 152469321 | 152469321 | C   | A  |
| ESCC-F25 | exonic   | <i>ADCY8</i>                                                                                                                                  | nonsynonymous SNV      | NM_001115:c.A2606G:p.Y869C           |                                | chr8  | 131848592 | 131848592 | T   | C  |
| ESCC-F25 | exonic   | <i>UTY</i>                                                                                                                                    | frameshift insertion   | NM_007125:c.906-907insT.p.1302fs     |                                | chrY  | 15472369  | 15472369  | -   | A  |
| ESCC-F26 | exonic   | <i>MEITL18</i>                                                                                                                                | nonsynonymous SNV      | NM_033418:c.G124A:p.E42K             |                                | chr1  | 169762713 | 169762713 | C   | T  |
| ESCC-F26 | exonic   | <i>PCDH20</i>                                                                                                                                 | nonsynonymous SNV      | NM_022843:c.A640G:p.L214V            |                                | chr13 | 61987592  | 61987592  | T   | C  |
| ESCC-F26 | exonic   | <i>ZNF443</i>                                                                                                                                 | nonsynonymous SNV      | NM_005815:c.A516T:p.K172N            |                                | chr19 | 12542470  | 12542470  | T   | A  |
| ESCC-F26 | splicing | <i>FSIP2(NM_173651:exon19:c.20593-1G&gt;T)</i>                                                                                                |                        |                                      |                                | chr2  | 186680097 | 186680097 | G   | T  |
| ESCC-F26 | exonic   | <i>HSPBAP1</i>                                                                                                                                | nonsynonymous SNV      | NM_024610:c.T188C:p.L63P             |                                | chr3  | 122496630 | 122496630 | A   | G  |
| ESCC-F26 | exonic   | <i>SI</i>                                                                                                                                     | nonsynonymous SNV      | NM_001041:c.G1076A:p.R359H           |                                | chr3  | 164777760 | 164777760 | C   | T  |
| ESCC-F26 | exonic   | <i>CASP8AP2</i>                                                                                                                               | nonsynonymous SNV      | NM_001137667:c.G3870C:p.E1290D       |                                | chr6  | 90576879  | 90576879  | G   | C  |
| ESCC-F26 | exonic   | <i>SYNE1</i>                                                                                                                                  | stopgain SNV           | NM_033071:c.C8663A:p.S2888X          |                                | chr6  | 152706819 | 152706819 | G   | T  |
| ESCC-F26 | exonic   | <i>ABC5</i>                                                                                                                                   | nonsynonymous SNV      | NM_001163942:c.G265A:p.A89T          |                                | chr7  | 20698192  | 20698192  | G   | A  |
| ESCC-F27 | exonic   | <i>VPS13D</i>                                                                                                                                 | nonsynonymous SNV      | NM_015378:c.G15600C:p.M520I          |                                | chr1  | 12322103  | 12322103  | G   | C  |
| ESCC-F27 | exonic   | <i>PRDM2</i>                                                                                                                                  | nonsynonymous SNV      | NM_001007257:c.G2740C:p.E914Q        |                                | chr1  | 14107633  | 14107633  | G   | C  |
| ESCC-F27 | exonic   | <i>JAK1</i>                                                                                                                                   | nonsynonymous SNV      | NM_002227:c.G3367C:p.E1123Q          |                                | chr1  | 65301081  | 65301081  | C   | G  |
| ESCC-F27 | exonic   | <i>ARHGAP29</i>                                                                                                                               | nonsynonymous SNV      | NM_004815:c.G3A:p.M1I                |                                | chr1  | 94697165  | 94697165  | C   | T  |
| ESCC-F27 | exonic   | <i>CRB1</i>                                                                                                                                   | nonsynonymous SNV      | NM_201253:c.C772T:p.H258Y            |                                | chr1  | 197313530 | 197313530 | C   | T  |
| ESCC-F27 | exonic   | <i>HEPHL1</i>                                                                                                                                 | nonsynonymous SNV      | NM_001098672:c.G2285C:p.R762T        |                                | chr11 | 93822125  | 93822125  | G   | C  |
| ESCC-F27 | exonic   | <i>AMOTL1</i>                                                                                                                                 | nonsynonymous SNV      | NM_130847:c.A2146G:p.I716V           |                                | chr11 | 94597910  | 94597910  | A   | G  |
| ESCC-F27 | exonic   | <i>ANAPC5</i>                                                                                                                                 | stopgain SNV           | NM_001137559:c.C908G:p.S303X         |                                | chr12 | 121766179 | 121766179 | G   | C  |
| ESCC-F27 | exonic   | <i>OCA2</i>                                                                                                                                   | nonsynonymous SNV      | NM_000275:c.T1148A:p.L383N           |                                | chr15 | 28234781  | 28234781  | A   | T  |
| ESCC-F27 | exonic   | <i>TP53</i>                                                                                                                                   | stopgain SNV           | NM_001126115:c.G42A:p.W14X           | 687592;905938;907276;908443;90 | chr17 | 7578492   | 7578492   | C   | T  |
| ESCC-F27 | exonic   | <i>PLXDC1</i>                                                                                                                                 | nonsynonymous SNV      | NM_020405:c.G643C:p.D215H            |                                | chr17 | 37263728  | 37263728  | C   | G  |
| ESCC-F27 | exonic   | <i>MED13</i>                                                                                                                                  | nonsynonymous SNV      | NM_005121:c.G6513C:p.M2171I          |                                | chr17 | 60023841  | 60023841  | C   | G  |
| ESCC-F27 | exonic   | <i>LILRB1</i>                                                                                                                                 | nonsynonymous SNV      | NM_001081637:c.G1294A:p.G432S        |                                | chr19 | 55145121  | 55145121  | G   | A  |
| ESCC-F27 | exonic   | <i>ZC3H6</i>                                                                                                                                  | nonsynonymous SNV      | NM_198581:c.A2215T:p.T739S           |                                | chr2  | 113088710 | 113088710 | A   | T  |
| ESCC-F27 | exonic   | <i>EP300</i>                                                                                                                                  | nonsynonymous SNV      | NM_001429:c.G4527C:p.W1509C          |                                | chr22 | 41568577  | 41568577  | G   | C  |
| ESCC-F27 | exonic   | <i>PLXNA1</i>                                                                                                                                 | nonsynonymous SNV      | NM_032242:c.G3952A:p.G1318S          |                                | chr3  | 126739101 | 126739101 | G   | A  |
| ESCC-F27 | exonic   | <i>PIK3CA</i>                                                                                                                                 | nonsynonymous SNV      | NM_006218:c.G1624A:p.E542K           | 762670;762672;762683;762684;76 | chr3  | 178936082 | 178936082 | G   | A  |

|          |                 |                                                |                      |                                     |                                |       |           |           |   |   |
|----------|-----------------|------------------------------------------------|----------------------|-------------------------------------|--------------------------------|-------|-----------|-----------|---|---|
| ESCC-F27 | exonic          | <i>TRIM10</i>                                  | nonsynonymous SNV    | NM_052828:c.G1174A:p.E392K          |                                | chr6  | 30121479  | 30121479  | C | T |
| ESCC-F27 | exonic          | <i>MLLT4</i>                                   | nonsynonymous SNV    | NM_001040000:c.G358C:p.D120H        |                                | chr6  | 168271122 | 168271122 | G | C |
| ESCC-F27 | exonic          | <i>VCP1P1</i>                                  | nonsynonymous SNV    | NM_025054:c.A1436T:p.H479L          |                                | chr8  | 67577758  | 67577758  | T | A |
| ESCC-F27 | exonic          | <i>CDK5RAP2</i>                                | nonsynonymous SNV    | NM_001011649:c.C1488G:p.F496L       |                                | chr9  | 123249710 | 123249710 | G | C |
| ESCC-F28 | exonic          | <i>MUC2</i>                                    | nonsynonymous SNV    | NM_002457:c.C4739A:p.T1580N         |                                | chr11 | 1092920   | 1092920   | C | A |
| ESCC-F28 | exonic          | <i>MGAT4C</i>                                  | nonsynonymous SNV    | NM_013244:c.G446A:p.R149H           |                                | chr12 | 86374058  | 86374058  | C | T |
| ESCC-F28 | exonic          | <i>MYH4</i>                                    | nonsynonymous SNV    | NM_017533:c.G5134C:p.D1712H         |                                | chr17 | 10350365  | 10350365  | C | G |
| ESCC-F28 | exonic          | <i>TP53</i>                                    | frameshift deletion  | NM_00126115:c.384delC;p.S128fs      | 905938;907276;907321;909707;94 | chr17 | 7577501   | 7577501   | G | - |
| ESCC-F28 | exonic          | <i>SLC4A10</i>                                 | nonsynonymous SNV    | NM_022058:c.C1111A:p.H571N          |                                | chr2  | 162751195 | 162751195 | C | A |
| ESCC-F28 | exonic          | <i>MUC4</i>                                    | nonsynonymous SNV    | NM_018406:c.A3328G:p.T1110A         |                                | chr3  | 195515123 | 195515123 | T | C |
| ESCC-F28 | exonic          | <i>THSD7A</i>                                  | nonsynonymous SNV    | NM_015204:c.C2357T:p.S786L          |                                | chr7  | 11509517  | 11509517  | G | A |
| ESCC-F29 | exonic          | <i>NBPF1</i>                                   | unknown              | UNKNOWN                             |                                | chr1  | 16890599  | 16890599  | A | G |
| ESCC-F29 | exonic          | <i>MGAT4C</i>                                  | nonsynonymous SNV    | NM_013244:c.G991C:p.E331Q           |                                | chr12 | 86373513  | 86373513  | C | G |
| ESCC-F29 | exonic          | <i>CEP192</i>                                  | nonsynonymous SNV    | NM_032142:c.A4292T:p.K1431M         |                                | chr18 | 13059115  | 13059115  | A | T |
| ESCC-F29 | exonic          | <i>FAM135B</i>                                 | nonsynonymous SNV    | NM_015912:c.T395G:p.M132R           |                                | chr8  | 139263231 | 139263231 | A | C |
| ESCC-F29 | exonic          | <i>MCF2</i>                                    | nonsynonymous SNV    | NM_001171877:c.G2451T;p.M817I       |                                | chrX  | 138664617 | 138664617 | C | A |
| ESCC-F30 | exonic          | <i>PRRC2C</i>                                  | nonsynonymous SNV    | NM_015172:c.G4843A:p.G1615S         |                                | chr1  | 171514703 | 171514703 | G | A |
| ESCC-F30 | exonic          | <i>CEP350</i>                                  | nonsynonymous SNV    | NM_014810:c.G8014A:p.D2627N         |                                | chr1  | 180063254 | 180063254 | G | A |
| ESCC-F30 | exonic          | <i>CTNNA3</i>                                  | nonsynonymous SNV    | NM_001127384:c.G34A:p.D12N          |                                | chr10 | 69407238  | 69407238  | C | T |
| ESCC-F30 | exonic          | <i>NEURLA</i>                                  | nonsynonymous SNV    | NM_001005408:c.A3083G:p.E1028G      |                                | chr17 | 7224889   | 7224889   | T | C |
| ESCC-F30 | exonic          | <i>TP53</i>                                    | stopgain SNV         | NM_001126115:c.C241T;p.R81X         | 687983;905938;905971;907000;90 | chr17 | 7578212   | 7578212   | G | A |
| ESCC-F30 | exonic          | <i>EMILIN2</i>                                 | nonsynonymous SNV    | NM_032048:c.G934A:p.E312K           |                                | chr18 | 2891059   | 2891059   | G | A |
| ESCC-F30 | exonic          | <i>PDHA2</i>                                   | stopgain SNV         | NM_005390:c.C276A:p.C92X            |                                | chr4  | 96761577  | 96761577  | C | A |
| ESCC-F30 | exonic          | <i>SLC22A23</i>                                | nonsynonymous SNV    | NM_015482:c.A793G:p.L265V           |                                | chr6  | 3410542   | 3410542   | T | C |
| ESCC-F30 | splicing        | <i>THSD7A(NM_015204:exon20:c.3916+1G&gt;T)</i> |                      |                                     |                                | chr7  | 11446932  | 11446932  | C | A |
| ESCC-F31 | exonic:splicing | <i>DIAPH3:DIAPH3</i>                           | nonsynonymous SNV    | NM_030932:c.G572A:p.R191K           |                                | chr13 | 60565292  | 60565292  | C | T |
| ESCC-F31 | exonic          | <i>TIN</i>                                     | nonsynonymous SNV    | NM_133378:c.A32439T;p.E10813D       |                                | chr2  | 179514967 | 179514967 | T | A |
| ESCC-F31 | exonic          | <i>MAP2</i>                                    | nonsynonymous SNV    | NM_031847:c.A1019G:p.N340S          |                                | chr2  | 210588332 | 210588332 | A | G |
| ESCC-F31 | exonic          | <i>SPHKAP</i>                                  | nonsynonymous SNV    | NM_001142644:c.G83C:p.R28T          |                                | chr2  | 228996751 | 228996751 | C | G |
| ESCC-F31 | exonic          | <i>PCHDA12</i>                                 | nonsynonymous SNV    | NM_018903:c.G133A:p.V45M            |                                | chr5  | 140255190 | 140255190 | G | A |
| ESCC-F31 | exonic          | <i>ARHGAP26</i>                                | nonsynonymous SNV    | NM_001135608:c.G1831A:p.E611K       |                                | chr5  | 142513664 | 142513664 | G | A |
| ESCC-F31 | exonic          | <i>NOTCH1</i>                                  | nonsynonymous SNV    | NM_017617:c.G1393A:p.A465T          |                                | chr9  | 139412252 | 139412252 | C | T |
| ESCC-F31 | exonic          | <i>TLR7</i>                                    | nonsynonymous SNV    | NM_016562:c.C2971T;p.L991F          |                                | chrX  | 12906598  | 12906598  | C | T |
| ESCC-F32 | exonic          | <i>CDK11B</i>                                  | nonsynonymous SNV    | NM_033487:c.C977T;p.T326I           |                                | chr1  | 1572314   | 1572314   | G | A |
| ESCC-F32 | exonic          | <i>USP24</i>                                   | nonsynonymous SNV    | NM_015306:c.T2189A:p.R730H          |                                | chr1  | 55612663  | 55612663  | C | T |
| ESCC-F32 | exonic          | <i>ADCY10</i>                                  | nonsynonymous SNV    | NM_001167749:c.G2523C:p.K841N       |                                | chr1  | 167814826 | 167814826 | C | G |
| ESCC-F32 | exonic          | <i>ASTN1</i>                                   | nonsynonymous SNV    | NM_004319:c.G1805A:p.R602H          |                                | chr1  | 176926896 | 176926896 | C | T |
| ESCC-F32 | exonic          | <i>CACNA1E</i>                                 | nonsynonymous SNV    | NM_001205294:c.G3409C:p.E1137Q      |                                | chr1  | 181706704 | 181706704 | G | C |
| ESCC-F32 | exonic          | <i>SHANK2</i>                                  | nonsynonymous SNV    | NM_133266:c.G3778C:p.D1260H         |                                | chr11 | 70318982  | 70318982  | C | G |
| ESCC-F32 | exonic          | <i>HECTD1</i>                                  | nonsynonymous SNV    | NM_015382:c.C790T;p.P264S           |                                | chr14 | 31642826  | 31642826  | G | A |
| ESCC-F32 | exonic          | <i>DICER1</i>                                  | nonsynonymous SNV    | NM_001195573:c.A2485G:p.I829V       |                                | chr14 | 95574382  | 95574382  | T | C |
| ESCC-F32 | exonic          | <i>MYO9A</i>                                   | nonsynonymous SNV    | NM_006901:c.C6826T;p.R2276C         |                                | chr15 | 72141197  | 72141197  | G | A |
| ESCC-F32 | exonic          | <i>RAI1</i>                                    | frameshift insertion | NM_030665:c.3096_3097insC;p.G1032fs |                                | chr17 | 17699358  | 17699358  | - | C |
| ESCC-F32 | exonic          | <i>MUC16</i>                                   | nonsynonymous SNV    | NM_024690:c.G23858A:p.G7953D        |                                | chr19 | 9063588   | 9063588   | C | T |
| ESCC-F32 | exonic          | <i>ZNF560</i>                                  | nonsynonymous SNV    | NM_152476:c.G372T;p.W124C           |                                | chr19 | 9581144   | 9581144   | C | A |
| ESCC-F32 | exonic          | <i>ALK</i>                                     | nonsynonymous SNV    | NM_004304:c.C4675T;p.P1559S         |                                | chr2  | 29416278  | 29416278  | G | A |
| ESCC-F32 | exonic          | <i>C2orf55</i>                                 | nonsynonymous SNV    | NM_207362:c.A2393G:p.K798R          |                                | chr2  | 99438343  | 99438343  | T | C |
| ESCC-F32 | exonic          | <i>TIN</i>                                     | nonsynonymous SNV    | NM_003319:c.A66809G:p.D22270G       |                                | chr2  | 179412349 | 179412349 | T | C |
| ESCC-F32 | exonic          | <i>TIN</i>                                     | nonsynonymous SNV    | NM_003319:c.G14401A:p.V4801I        |                                | chr2  | 179500702 | 179500702 | C | T |
| ESCC-F32 | exonic          | <i>TIN</i>                                     | nonsynonymous SNV    | NM_003319:c.G14329C:p.A4777P        |                                | chr2  | 179500774 | 179500774 | C | G |
| ESCC-F32 | exonic          | <i>ERBB4</i>                                   | nonsynonymous SNV    | NM_001042599:c.C1708A:p.H570N       |                                | chr2  | 212537897 | 212537897 | G | T |
| ESCC-F32 | exonic          | <i>SPHKAP</i>                                  | nonsynonymous SNV    | NM_001142644:c.G4369C;p.E1457Q      |                                | chr2  | 228881201 | 228881201 | C | G |
| ESCC-F32 | exonic          | <i>WFDC10A</i>                                 | nonsynonymous SNV    | NM_080753:c.C203A:p.S68Y            |                                | chr20 | 44259620  | 44259620  | C | A |
| ESCC-F32 | exonic          | <i>MUC4</i>                                    | nonsynonymous SNV    | NM_018406:c.C8581G:p.H2861D         |                                | chr3  | 195509870 | 195509870 | G | C |
| ESCC-F32 | exonic          | <i>PRDM9</i>                                   | nonsynonymous SNV    | NM_020227:c.G2333C:p.C778S          |                                | chr5  | 23527530  | 23527530  | G | C |
| ESCC-F32 | exonic          | <i>PDZD2</i>                                   | nonsynonymous SNV    | NM_178140:c.G5920C:p.V1974L         |                                | chr5  | 32089474  | 32089474  | G | C |
| ESCC-F32 | exonic          | <i>DMXL1</i>                                   | nonsynonymous SNV    | NM_005509:c.G2042A:p.C681Y          |                                | chr5  | 118469661 | 118469661 | G | A |
| ESCC-F32 | exonic          | <i>SLC26A7</i>                                 | nonsynonymous SNV    | NM_052832:c.G313A:p.A105T           |                                | chr8  | 92307767  | 92307767  | G | A |
| ESCC-F32 | splicing        | <i>ERP44(NM_015051:exon5:c.286+1G&gt;A)</i>    |                      |                                     |                                | chr9  | 102814698 | 102814698 | C | T |
| ESCC-F32 | exonic          | <i>TSC1</i>                                    | nonsynonymous SNV    | NM_001162427:c.A2519G:p.N840S       | 906827                         | chr9  | 135772951 | 135772951 | T | C |
| ESCC-F33 | exonic          | <i>TP53</i>                                    | nonsynonymous SNV    | NM_001126115:c.G248T;p.S83I         | 687829;905938;907276;908134;90 | chr17 | 7578205   | 7578205   | C | A |
| ESCC-F34 | exonic          | <i>SPEN</i>                                    | nonsynonymous SNV    | NM_015001:c.C9561A:p.H3187Q         |                                | chr1  | 16262296  | 16262296  | C | A |
| ESCC-F34 | exonic          | <i>USH2A</i>                                   | nonsynonymous SNV    | NM_206933:c.T13436C;p.L4479P        |                                | chr1  | 215847817 | 215847817 | A | G |
| ESCC-F34 | exonic          | <i>CHST11</i>                                  | nonsynonymous SNV    | NM_001173982:c.C142T;p.R43W         |                                | chr12 | 104995722 | 104995722 | C | T |
| ESCC-F34 | exonic          | <i>TPTE2</i>                                   | nonsynonymous SNV    | NM_130785:c.C520T;p.R174W           |                                | chr13 | 20025356  | 20025356  | G | A |
| ESCC-F34 | exonic          | <i>AHNAK2</i>                                  | nonsynonymous SNV    | NM_138420:c.C6997T;p.L2333F         |                                | chr14 | 105414791 | 105414791 | G | A |
| ESCC-F34 | exonic          | <i>AHNAK2</i>                                  | nonsynonymous SNV    | NM_138420:c.G3217C;p.E1073Q         |                                | chr14 | 105418571 | 105418571 | C | G |
| ESCC-F34 | exonic          | <i>HYDIN</i>                                   | nonsynonymous SNV    | NM_032821:c.G12508A:p.V4170M        |                                | chr16 | 70884491  | 70884491  | C | T |
| ESCC-F34 | exonic          | <i>CTC1</i>                                    | nonsynonymous SNV    | NM_025099:c.C2411T;p.S804L          |                                | chr17 | 8135108   | 8135108   | G | A |
| ESCC-F34 | exonic          | <i>ANKRD12</i>                                 | stopgain SNV         | NM_001083625:c.T3762A:p.Y1254X      |                                | chr18 | 9257096   | 9257096   | T | A |
| ESCC-F34 | exonic          | <i>ZNF230</i>                                  | nonsynonymous SNV    | NM_006300:c.G87C:p.Q29H             |                                | chr19 | 44513013  | 44513013  | G | C |

|          |          |                                                                                               |                        |                                         |                                |       |           |           |     |   |
|----------|----------|-----------------------------------------------------------------------------------------------|------------------------|-----------------------------------------|--------------------------------|-------|-----------|-----------|-----|---|
| ESCC-F34 | exonic   | ZNF665                                                                                        | stopgain SNV           | NM_024733:c.C1038A:p.Y346X              |                                | chr19 | 53668705  | 53668705  | G   | T |
| ESCC-F34 | exonic   | ZNF749                                                                                        | stopgain SNV           | NM_001023561:c.C865T:p.Q289X            |                                | chr19 | 57955381  | 57955381  | C   | T |
| ESCC-F34 | exonic   | XIRP2                                                                                         | nonsynonymous SNV      | NM_001199144:c.G4549A:p.E1517K          |                                | chr2  | 168103117 | 168103117 | G   | A |
| ESCC-F34 | exonic   | MICMSAP                                                                                       | nonsynonymous SNV      | NM_003906:c.G3457A:p.E1153K             |                                | chr21 | 47681204  | 47681204  | C   | T |
| ESCC-F34 | exonic   | EP300                                                                                         | nonframeshift deletion | NM_001429:c.3778_3780del:p.L260_1260del |                                | chr22 | 41560106  | 41560108  | CTT | - |
| ESCC-F34 | exonic   | SI                                                                                            | nonsynonymous SNV      | NM_001041:c.C1042G:p.P348A              |                                | chr3  | 164777794 | 164777794 | G   | C |
| ESCC-F34 | exonic   | FBXW7                                                                                         | nonsynonymous SNV      | NM_001013415:c.G1084A:p.D362N           | 906763:1423749                 | chr4  | 153247364 | 153247364 | C   | T |
| ESCC-F34 | exonic   | AKAP9                                                                                         | nonsynonymous SNV      | NM_005751:c.G9200C:p.R3067T             |                                | chr7  | 91715717  | 91715717  | G   | C |
| ESCC-F34 | exonic   | RP1                                                                                           | nonsynonymous SNV      | NM_006269:c.G5930C:p.R1977T             |                                | chr8  | 55542372  | 55542372  | G   | C |
| ESCC-F34 | exonic   | ATRX                                                                                          | nonsynonymous SNV      | NM_138270:c.C4327T:p.R1443W             |                                | chrX  | 76907720  | 76907720  | G   | A |
| ESCC-F35 | exonic   | HMCN1                                                                                         | stopgain SNV           | NM_031935:c.C337T:p.Q113X               |                                | chr1  | 185815226 | 185815226 | C   | T |
| ESCC-F35 | exonic   | OR2W5                                                                                         | nonsynonymous SNV      | NM_001004698:c.C829T:p.L277F            |                                | chr1  | 247655258 | 247655258 | C   | T |
| ESCC-F35 | exonic   | APLNLR                                                                                        | nonsynonymous SNV      | NM_005161:c.G185A:p.R62H                |                                | chr11 | 57004294  | 57004294  | C   | T |
| ESCC-F35 | exonic   | SYNE2                                                                                         | nonsynonymous SNV      | NM_015180:c.T10190C:p.L3397S            |                                | chr14 | 64529591  | 64529591  | T   | C |
| ESCC-F35 | exonic   | TP53                                                                                          | nonsynonymous SNV      | NM_001126115:c.A92G:p.Y31C              | 688022:724855:749709:753534:90 | chr17 | 7578442   | 7578442   | T   | C |
| ESCC-F35 | exonic   | FTSJ3                                                                                         | frameshift insertion   | NM_017647:c.2530_2531insA:p.H844fs      |                                | chr17 | 61897176  | 61897176  | -   | T |
| ESCC-F35 | exonic   | ZNF816-ZNF321P                                                                                | nonsynonymous SNV      | NM_001202473:c.T293A:p.P98N             | 1474863                        | chr19 | 53432565  | 53432565  | A   | T |
| ESCC-F35 | exonic   | TIN                                                                                           | nonsynonymous SNV      | NM_003319:c.G65341A:p.V21781M           |                                | chr2  | 179413817 | 179413817 | C   | T |
| ESCC-F35 | exonic   | COLAA4                                                                                        | nonsynonymous SNV      | NM_000092:c.C1852A:p.L618M              |                                | chr2  | 227942745 | 227942745 | G   | T |
| ESCC-F35 | exonic   | MYO18B                                                                                        | nonsynonymous SNV      | NM_032608:c.C6509T:p.S2170T             |                                | chr22 | 26422449  | 26422449  | C   | T |
| ESCC-F35 | exonic   | SI                                                                                            | nonsynonymous SNV      | NM_001041:c.G357T:p.M119I               |                                | chr3  | 164786882 | 164786882 | C   | A |
| ESCC-F35 | exonic   | OR2B2                                                                                         | nonsynonymous SNV      | NM_033057:c.C808T:p.R270W               |                                | chr6  | 27879290  | 27879290  | G   | A |
| ESCC-F35 | exonic   | PCLO                                                                                          | nonsynonymous SNV      | NM_014510:c.G802A:p.D268N               |                                | chr7  | 82785155  | 82785155  | C   | T |
| ESCC-F35 | exonic   | ABCBI                                                                                         | nonsynonymous SNV      | NM_000927:c.T3728G:p.I1243R             |                                | chr7  | 87133674  | 87133674  | A   | C |
| ESCC-F35 | exonic   | PTPRZ1                                                                                        | nonsynonymous SNV      | NM_002851:c.G4244A:p.G1415D             |                                | chr7  | 121653344 | 121653344 | G   | A |
| ESCC-F35 | exonic   | VPS13B                                                                                        | nonsynonymous SNV      | NM_017890:c.G10573C:p.E3525Q            |                                | chr8  | 100866115 | 100866115 | G   | C |
| ESCC-F35 | exonic   | CSMD3                                                                                         | nonsynonymous SNV      | NM_052900:c.G465T:p.L155F               |                                | chr8  | 114290870 | 114290870 | C   | A |
| ESCC-F35 | exonic   | ASTN2                                                                                         | nonsynonymous SNV      | NM_014010:c.C1102T:p.R368C              |                                | chr9  | 119858344 | 119858344 | G   | A |
| ESCC-F36 | exonic   | LGR6                                                                                          | nonsynonymous SNV      | NM_001017404:c.C1370T:p.P457L           |                                | chr1  | 202287218 | 202287218 | C   | T |
| ESCC-F36 | exonic   | FMN2                                                                                          | stopgain SNV           | NM_020066:c.C4522T:p.R1508X             |                                | chr1  | 240493987 | 240493987 | C   | T |
| ESCC-F36 | exonic   | WDR64                                                                                         | nonsynonymous SNV      | NM_144625:c.G934C:p.E312Q               |                                | chr1  | 241850887 | 241850887 | G   | C |
| ESCC-F36 | exonic   | ZNF669                                                                                        | nonsynonymous SNV      | NM_001142572:c.G55A:p.A19T              |                                | chr1  | 247265364 | 247265364 | C   | T |
| ESCC-F36 | exonic   | MYO3A                                                                                         | nonsynonymous SNV      | NM_017433:c.G2497A:p.A833T              |                                | chr10 | 26434455  | 26434455  | G   | A |
| ESCC-F36 | exonic   | TP53                                                                                          | nonsynonymous SNV      | NM_001126115:c.G401C:p.G134A            | 753566:905938:905975:905988:90 | chr17 | 7577141   | 7577141   | C   | T |
| ESCC-F36 | exonic   | TP53                                                                                          | nonsynonymous SNV      | NM_001126115:c.G400A:p.G134R            | 753566:905938:907276:909707:91 | chr17 | 7577142   | 7577142   | C   | T |
| ESCC-F36 | exonic   | CDK12                                                                                         | nonsynonymous SNV      | NM_015083:c.G2705T:p.R902L              |                                | chr17 | 37667820  | 37667820  | G   | T |
| ESCC-F36 | exonic   | MAP2                                                                                          | nonsynonymous SNV      | NM_002374:c.G2266T:p.A756S              |                                | chr2  | 210559160 | 210559160 | G   | T |
| ESCC-F36 | exonic   | UNC80                                                                                         | nonsynonymous SNV      | NM_032504:c.C497G:p.S166C               |                                | chr2  | 210642180 | 210642180 | C   | G |
| ESCC-F36 | exonic   | SPHKAP                                                                                        | nonsynonymous SNV      | NM_001142644:c.C1496T:p.A499V           |                                | chr2  | 228884074 | 228884074 | G   | A |
| ESCC-F36 | exonic   | ZBBX                                                                                          | nonsynonymous SNV      | NM_001199201:c.C1165A:p.P389T           |                                | chr3  | 167034822 | 167034822 | G   | T |
| ESCC-F36 | exonic   | TIN1                                                                                          | nonsynonymous SNV      | NM_001161560:c.G1316A:p.R439H           |                                | chr3  | 170858204 | 170858204 | C   | T |
| ESCC-F36 | splicing | ANK2(NM_001127493:exon10:c.730-1G>-T,NM_020977:exon9:c.793-1G>-T,NM_001148:exon9:c.793-1G>-T) |                        |                                         |                                | chr4  | 114163266 | 114163266 | G   | T |
| ESCC-F36 | exonic   | GPR98                                                                                         | nonsynonymous SNV      | NM_032119:c.C1405A:p.L469I              |                                | chr5  | 89924545  | 89924545  | C   | A |
| ESCC-F36 | exonic   | GRM3                                                                                          | nonsynonymous SNV      | NM_000840:c.G2432T:p.G811V              |                                | chr7  | 86479726  | 86479726  | G   | T |
| ESCC-F36 | exonic   | CSMD3                                                                                         | nonsynonymous SNV      | NM_052900:c.C3341T:p.S1114L             |                                | chr8  | 113649108 | 113649108 | G   | A |
| ESCC-F37 | exonic   | RB1                                                                                           | nonframeshift deletion | NM_000321:c.2012_2014del:p.671_672del   | 687459:724873:753548:906812:90 | chr13 | 49033875  | 49033877  | CTG | - |
| ESCC-F37 | exonic   | TP53                                                                                          | nonsynonymous SNV      | NM_001126115:c.G250T:p.V58L             | 753586:905938:906849:907063:90 | chr17 | 7578203   | 7578203   | C   | A |
| ESCC-F37 | exonic   | MUC16                                                                                         | nonsynonymous SNV      | NM_024690:c.G2473T:p.G825W              |                                | chr19 | 9089342   | 9089342   | C   | A |
| ESCC-F37 | exonic   | SCN7A                                                                                         | nonsynonymous SNV      | NM_002976:c.G4537C:p.D1513H             |                                | chr2  | 167262602 | 167262602 | C   | G |
| ESCC-F37 | exonic   | NFE2L2                                                                                        | nonsynonymous SNV      | NM_001145412:c.G37A:p.D13N              | 1560530:1560573:1571456:15795S | chr2  | 178098960 | 178098960 | C   | T |
| ESCC-F37 | exonic   | BDP1                                                                                          | nonsynonymous SNV      | NM_018429:c.C4459G:p.P1482A             |                                | chr5  | 70809223  | 70809223  | C   | G |
| ESCC-F37 | exonic   | DMXL1                                                                                         | nonsynonymous SNV      | NM_005509:c.G4384A:p.D1462N             |                                | chr5  | 118485906 | 118485906 | G   | A |
| ESCC-F37 | exonic   | MLL3                                                                                          | stopgain SNV           | NM_170606:c.A11539T:p.K3847X            |                                | chr7  | 151856079 | 151856079 | T   | A |
| ESCC-F38 | exonic   | KIAA1804                                                                                      | nonsynonymous SNV      | NM_032435:c.T812C:p.L271P               |                                | chr1  | 233482194 | 233482194 | T   | C |
| ESCC-F38 | exonic   | WDR64                                                                                         | nonsynonymous SNV      | NM_144625:c.A41G:p.Q14R                 |                                | chr1  | 241815827 | 241815827 | A   | G |
| ESCC-F38 | exonic   | C10orf71                                                                                      | nonsynonymous SNV      | NM_001135196:c.G1486A:p.A496T           |                                | chr10 | 50532076  | 50532076  | G   | A |
| ESCC-F38 | exonic   | RNF213                                                                                        | nonsynonymous SNV      | NM_001256071:c.G3887A:p.G1296E          |                                | chr17 | 78306175  | 78306175  | G   | A |
| ESCC-F38 | exonic   | ZNF257                                                                                        | nonsynonymous SNV      | NM_033468:c.C1067G:p.S356C              |                                | chr19 | 22271619  | 22271619  | C   | G |
| ESCC-F38 | exonic   | ALK                                                                                           | nonsynonymous SNV      | NM_004304:c.G1969C:p.E657Q              |                                | chr2  | 29498037  | 29498037  | C   | G |
| ESCC-F38 | exonic   | TIN                                                                                           | nonsynonymous SNV      | NM_003319:c.A1643C:p.K548T              |                                | chr2  | 179656818 | 179656818 | T   | G |
| ESCC-F38 | exonic   | SPHKAP                                                                                        | nonsynonymous SNV      | NM_001142644:c.C2009A:p.T670N           |                                | chr2  | 228883561 | 228883561 | G   | T |
| ESCC-F38 | exonic   | IGSF10                                                                                        | nonsynonymous SNV      | NM_178822:c.C2989A:p.P997T              |                                | chr3  | 151164780 | 151164780 | G   | T |
| ESCC-F38 | exonic   | PHF3                                                                                          | nonsynonymous SNV      | NM_015153:c.A5813T:p.E1938V             |                                | chr6  | 64423297  | 64423297  | A   | T |
| ESCC-F38 | exonic   | ENPP1                                                                                         | nonsynonymous SNV      | NM_006208:c.A2333T:p.D778V              |                                | chr6  | 132206092 | 132206092 | A   | T |
| ESCC-F38 | exonic   | HDAC9                                                                                         | nonsynonymous SNV      | NM_001204147:c.C839T:p.T280M            |                                | chr7  | 18687451  | 18687451  | C   | T |
| ESCC-F38 | exonic   | IKZF1                                                                                         | nonsynonymous SNV      | NM_001220772:c.T679C:p.Y227H            |                                | chr7  | 50468254  | 50468254  | T   | C |
| ESCC-F38 | exonic   | ABCBI                                                                                         | stopgain SNV           | NM_000927:c.G421T:p.G141X               |                                | chr7  | 87196210  | 87196210  | C   | A |
| ESCC-F38 | exonic   | PLAG1                                                                                         | stopgain SNV           | NM_001114635:c.G793T:p.E265X            |                                | chr8  | 57079266  | 57079266  | C   | G |
| ESCC-F38 | exonic   | GPR112                                                                                        | nonsynonymous SNV      | NM_153834:c.C1634G:p.S545C              |                                | chrX  | 135427499 | 135427499 | C   | G |
| ESCC-F38 | exonic   | GPR112                                                                                        | nonsynonymous SNV      | NM_153834:c.C1661G:p.S554C              |                                | chrX  | 135427526 | 135427526 | C   | G |
| ESCC-F39 | exonic   | KIAA0754                                                                                      | nonsynonymous SNV      | NM_015038:c.T1527G:p.H509Q              |                                | chr1  | 39877464  | 39877464  | T   | G |



|          |          |                                                                                 |                        |                                            |                                |       |           |           |     |   |
|----------|----------|---------------------------------------------------------------------------------|------------------------|--------------------------------------------|--------------------------------|-------|-----------|-----------|-----|---|
| ESCC-F39 | exonic   | <b>PGBD2</b>                                                                    | nonsynonymous SNV      | NM_170725:c.T671A:p.L224N                  |                                | chr1  | 249211454 | 249211454 | T   | A |
| ESCC-F39 | exonic   | <b>PGBD2</b>                                                                    | nonsynonymous SNV      | NM_170725:c.C672G:p.L224M                  |                                | chr1  | 249211455 | 249211455 | C   | G |
| ESCC-F39 | exonic   | <b>FSIP2</b>                                                                    | nonsynonymous SNV      | NM_173651:c.T14951C:p.I4984T               |                                | chr2  | 186668717 | 186668717 | T   | C |
| ESCC-F39 | exonic   | <b>MMRN1</b>                                                                    | nonsynonymous SNV      | NM_007351:c.G1921A:p.D641N                 |                                | chr4  | 90856752  | 90856752  | G   | A |
| ESCC-F39 | exonic   | <b>KIAA0947</b>                                                                 | nonsynonymous SNV      | NM_015325:c.T5964G:p.N1988K                |                                | chr5  | 5466518   | 5466518   | T   | G |
| ESCC-F39 | exonic   | <b>CMYA5</b>                                                                    | nonsynonymous SNV      | NM_153610:c.T10546C:p.C3516R               |                                | chr5  | 79035134  | 79035134  | T   | C |
| ESCC-F39 | exonic   | <b>DNAH8</b>                                                                    | nonsynonymous SNV      | NM_001206927:c.G7270C:p.V2424L             |                                | chr6  | 38840714  | 38840714  | G   | C |
| ESCC-F39 | exonic   | <b>XPO5</b>                                                                     | frameshift insertion   | NM_020750:c.3057_3058insTp.M1019fs         |                                | chr6  | 43493586  | 43493586  |     | A |
| ESCC-F39 | exonic   | <b>LAMA2</b>                                                                    | nonsynonymous SNV      | NM_000426:c.A4829G:p.Y1610C                |                                | chr6  | 129687475 | 129687475 | A   | G |
| ESCC-F39 | exonic   | <b>SYNE1</b>                                                                    | nonsynonymous SNV      | NM_033071:c.C22883A:p.S7628Y               |                                | chr6  | 152523008 | 152523008 | G   | T |
| ESCC-F39 | exonic   | <b>PIK3CG</b>                                                                   | nonsynonymous SNV      | NM_002649:c.T2005C:p.F669L                 |                                | chr7  | 106512991 | 106512991 | T   | C |
| ESCC-F40 | exonic   | <b>OR2L2</b>                                                                    | nonsynonymous SNV      | NM_001004686:c.T355G:p.Y119D               |                                | chr1  | 248201924 | 248201924 | T   | G |
| ESCC-F40 | exonic   | <b>MYO3A</b>                                                                    | nonsynonymous SNV      | NM_017433:c.G1241T:p.G414V                 |                                | chr10 | 26359110  | 26359110  | G   | T |
| ESCC-F40 | exonic   | <b>FAT3</b>                                                                     | nonsynonymous SNV      | NM_001008781:c.C3626T:p.S1209L             |                                | chr11 | 92430568  | 92430568  | C   | T |
| ESCC-F40 | exonic   | <b>ATM</b>                                                                      | nonsynonymous SNV      | NM_000051:c.G6814A:p.E2272K                |                                | chr11 | 108196791 | 108196791 | G   | A |
| ESCC-F40 | exonic   | <b>SLCO1A2</b>                                                                  | nonsynonymous SNV      | NM_021094:c.G35C:p.R12T                    |                                | chr12 | 21487547  | 21487547  | C   | G |
| ESCC-F40 | exonic   | <b>IKBP1</b>                                                                    | nonsynonymous SNV      | NM_201612:c.C887A:p.P296Q                  |                                | chr12 | 99007529  | 99007529  | G   | T |
| ESCC-F40 | exonic   | <b>FANI</b>                                                                     | nonsynonymous SNV      | NM_001146094:c.C1483G:p.Q495E              |                                | chr15 | 31202924  | 31202924  | C   | G |
| ESCC-F40 | exonic   | <b>TP53</b>                                                                     | nonsynonymous SNV      | NM_001126115:c.G248T:p.S83I                | 687829;905938;907276;908134;90 | chr17 | 7578205   | 7578205   | C   | A |
| ESCC-F40 | exonic   | <b>MYH8</b>                                                                     | nonsynonymous SNV      | NM_002472:c.G5482C:p.E1828Q                |                                | chr17 | 10295945  | 10295945  | C   | G |
| ESCC-F40 | exonic   | <b>ZNF845</b>                                                                   | nonsynonymous SNV      | NM_138374:c.G632C:p.R211T                  |                                | chr19 | 53854560  | 53854560  | G   | C |
| ESCC-F40 | exonic   | <b>ZNF776</b>                                                                   | stopgain SNV           | NM_173632:c.C1015T:p.Q339R                 |                                | chr19 | 58265513  | 58265513  | C   | T |
| ESCC-F40 | exonic   | <b>XIRP2</b>                                                                    | nonsynonymous SNV      | NM_001199145:c.C708G:p.F236L               |                                | chr2  | 168114430 | 168114430 | C   | G |
| ESCC-F40 | exonic   | <b>ITN</b>                                                                      | nonsynonymous SNV      | NM_003319:c.G68086A:p.E2269GK              |                                | chr2  | 179410682 | 179410682 | C   | T |
| ESCC-F40 | exonic   | <b>TTN</b>                                                                      | nonsynonymous SNV      | NM_003319:c.T34358C:p.V11453A              |                                | chr2  | 179454899 | 179454899 | A   | G |
| ESCC-F40 | exonic   | <b>FN1</b>                                                                      | nonsynonymous SNV      | NM_002026:c.A4066C:p.T1356P                |                                | chr2  | 216252938 | 216252938 | T   | G |
| ESCC-F40 | exonic   | <b>PBRM1</b>                                                                    | stopgain SNV           | NM_018131:c.G3253T:p.E1085X                |                                | chr3  | 52620500  | 52620500  | C   | A |
| ESCC-F40 | exonic   | <b>MYH15</b>                                                                    | nonsynonymous SNV      | NM_014981:c.G172A:p.D58N                   |                                | chr3  | 108224653 | 108224653 | C   | T |
| ESCC-F40 | splicing | <b>EVC2(NM_147127:exon14:c.1887-2A&gt;G,NM_001166136:exon14:c.1647-2A&gt;G)</b> |                        |                                            |                                | chr4  | 5627637   | 5627637   | T   | C |
| ESCC-F40 | exonic   | <b>KIAA0947</b>                                                                 | nonsynonymous SNV      | NM_015325:c.C5402T:p.S1801I                |                                | chr5  | 5464849   | 5464849   | C   | T |
| ESCC-F40 | exonic   | <b>KIAA0947</b>                                                                 | nonsynonymous SNV      | NM_015325:c.G6664C:p.D2222H                |                                | chr5  | 5489306   | 5489306   | G   | C |
| ESCC-F40 | exonic   | <b>DNAH5</b>                                                                    | nonsynonymous SNV      | NM_001369:c.G5047A:p.E1683K                |                                | chr5  | 13850828  | 13850828  | C   | T |
| ESCC-F40 | exonic   | <b>PRDM9</b>                                                                    | nonsynonymous SNV      | NM_020227:c.G1372C:p.E458Q                 |                                | chr5  | 23526569  | 23526569  | G   | C |
| ESCC-F40 | exonic   | <b>MAST4</b>                                                                    | nonsynonymous SNV      | NM_015183:c.G1640T:p.R547I                 |                                | chr5  | 66429455  | 66429455  | G   | T |
| ESCC-F40 | exonic   | <b>RANBP17</b>                                                                  | stopgain SNV           | NM_022897:c.G2277A:p.W759X                 |                                | chr5  | 170640680 | 170640680 | G   | A |
| ESCC-F40 | exonic   | <b>TAX1BP1</b>                                                                  | nonsynonymous SNV      | NM_001206902:c.C1522T:p.P508S              |                                | chr7  | 27867390  | 27867390  | C   | T |
| ESCC-F40 | exonic   | <b>PLXNA4</b>                                                                   | nonsynonymous SNV      | NM_001105543:c.T2132A:p.I71M               |                                | chr7  | 132193240 | 132193240 | A   | C |
| ESCC-F40 | exonic   | <b>KIAA1549</b>                                                                 | nonsynonymous SNV      | NM_001164665:c.G857A:p.R286Q               |                                | chr7  | 138603515 | 138603515 | C   | T |
| ESCC-F40 | exonic   | <b>CSMD3</b>                                                                    | nonsynonymous SNV      | NM_052900:c.G6928C:p.E2310Q                |                                | chr8  | 113332136 | 113332136 | C   | G |
| ESCC-F40 | exonic   | <b>FAM135B</b>                                                                  | nonsynonymous SNV      | NM_015912:c.G3213T:p.L1071F                |                                | chr8  | 139163505 | 139163505 | C   | A |
| ESCC-F40 | exonic   | <b>KDM6A</b>                                                                    | nonsynonymous SNV      | NM_021140:c.C775A:p.L259M                  | 724870;749715;908148;909771;94 | chrX  | 44913100  | 44913100  | C   | A |
| ESCC-F40 | exonic   | <b>ATRX</b>                                                                     | nonsynonymous SNV      | NM_138270:c.G3361C:p.E1121Q                |                                | chrX  | 76937273  | 76937273  | C   | G |
| ESCC-F41 | exonic   | <b>CACNA1E</b>                                                                  | nonsynonymous SNV      | NM_001205294:c.C6061T:p.R2021W             |                                | chr1  | 181765842 | 181765842 | C   | T |
| ESCC-F41 | exonic   | <b>HMCN1</b>                                                                    | nonsynonymous SNV      | NM_031935:c.G8521A:p.E2841K                |                                | chr1  | 186047274 | 186047274 | G   | A |
| ESCC-F41 | exonic   | <b>RGS21</b>                                                                    | nonsynonymous SNV      | NM_001039152:c.A64G:p.M22V                 |                                | chr1  | 192316495 | 192316495 | A   | G |
| ESCC-F41 | exonic   | <b>LRRTM3</b>                                                                   | nonsynonymous SNV      | NM_178011:c.C325T:p.R109C                  |                                | chr10 | 68686999  | 68686999  | C   | T |
| ESCC-F41 | exonic   | <b>KLHL1</b>                                                                    | nonsynonymous SNV      | NM_020866:c.G2199C:p.L733F                 |                                | chr13 | 70275882  | 70275882  | C   | G |
| ESCC-F41 | exonic   | <b>WHAMM</b>                                                                    | nonsynonymous SNV      | NM_001080435:c.C1999G:p.Q667E              |                                | chr15 | 83499708  | 83499708  | C   | G |
| ESCC-F41 | exonic   | <b>TP53</b>                                                                     | nonsynonymous SNV      | NM_001126115:c.T32A:p.V11E                 | 905938;907276;908138;909707;94 | chr17 | 7578502   | 7578502   | A   | T |
| ESCC-F41 | exonic   | <b>BRIP1</b>                                                                    | nonsynonymous SNV      | NM_032043:c.A1528G:p.K510E                 |                                | chr17 | 59861731  | 59861731  | T   | C |
| ESCC-F41 | exonic   | <b>RNF213</b>                                                                   | nonsynonymous SNV      | NM_001256071:c.G8725C:p.E2909Q             |                                | chr17 | 78320860  | 78320860  | G   | C |
| ESCC-F41 | exonic   | <b>MUC16</b>                                                                    | nonsynonymous SNV      | NM_024690:c.C10003G:p.L3335V               |                                | chr19 | 9077443   | 9077443   | G   | C |
| ESCC-F41 | exonic   | <b>ZNF761</b>                                                                   | stopgain SNV           | NM_001008401:c.G591A:p.W197X               | 1604872                        | chr19 | 53958352  | 53958352  | G   | A |
| ESCC-F41 | exonic   | <b>DNAH6</b>                                                                    | nonsynonymous SNV      | NM_001370:c.G9706A:p.E3236K                |                                | chr2  | 84945422  | 84945422  | G   | A |
| ESCC-F41 | exonic   | <b>MERTK</b>                                                                    | nonsynonymous SNV      | NM_006343:c.G451A:p.D151N                  |                                | chr2  | 112687086 | 112687086 | G   | A |
| ESCC-F41 | exonic   | <b>KANSL1L</b>                                                                  | nonsynonymous SNV      | NM_152519:c.G1630C:p.D544H                 |                                | chr2  | 210940401 | 210940401 | C   | G |
| ESCC-F41 | exonic   | <b>MYH15</b>                                                                    | nonsynonymous SNV      | NM_014981:c.G5767A:p.E1923K                |                                | chr3  | 108102501 | 108102501 | C   | T |
| ESCC-F41 | exonic   | <b>SHROOM3</b>                                                                  | nonsynonymous SNV      | NM_020859:c.C656T:p.S219F                  |                                | chr4  | 77659982  | 77659982  | C   | T |
| ESCC-F41 | exonic   | <b>MMRN1</b>                                                                    | nonsynonymous SNV      | NM_007351:c.C134A:p.P45H                   |                                | chr4  | 90816256  | 90816256  | C   | A |
| ESCC-F41 | exonic   | <b>PITCHD4</b>                                                                  | nonsynonymous SNV      | NM_001013732:c.G1847T:p.R616I              |                                | chr6  | 47846733  | 47846733  | C   | A |
| ESCC-F41 | exonic   | <b>CASP8AP2</b>                                                                 | nonframeshift deletion | NM_001137667:c.5674_5676del;p.1892_1892del |                                | chr6  | 90578683  | 90578685  | TCA | - |
| ESCC-F41 | exonic   | <b>PCLO</b>                                                                     | nonsynonymous SNV      | NM_033026:c.G15337T:p.G5113C               |                                | chr7  | 82387983  | 82387983  | C   | A |
| ESCC-F41 | exonic   | <b>IQB</b>                                                                      | nonsynonymous SNV      | NM_178827:c.C625G:p.L209V                  |                                | chr7  | 123143325 | 123143325 | G   | C |
| ESCC-F41 | exonic   | <b>CDKN2A</b>                                                                   | stopgain SNV           | NM_000077:c.G329A:p.W110X                  | 684052;687455;687457;687563;68 | chr9  | 21971029  | 21971029  | C   | T |
| ESCC-F41 | exonic   | <b>DMD</b>                                                                      | nonsynonymous SNV      | NM_004007:c.A1034G:p.E345G                 |                                | chrX  | 32632499  | 32632499  | T   | C |
| ESCC-F42 | exonic   | <b>MLL2</b>                                                                     | nonsynonymous SNV      | NM_003482:c.G4421T:p.C1474F                |                                | chr12 | 49440205  | 49440205  | C   | A |
| ESCC-F42 | exonic   | <b>TP53</b>                                                                     | nonsynonymous SNV      | NM_001126115:c.A263G:p.Y88C                | 687819;905938;906693;907045;90 | chr17 | 7578190   | 7578190   | T   | C |
| ESCC-F42 | exonic   | <b>ZNF91</b>                                                                    | frameshift insertion   | NM_003430:c.1012_1013insTp.A338fs          |                                | chr19 | 23544769  | 23544769  | -   | A |
| ESCC-F42 | exonic   | <b>COL4A4</b>                                                                   | nonsynonymous SNV      | NM_000092:c.C190T:p.R64W                   |                                | chr2  | 228004879 | 228004879 | G   | A |
| ESCC-F42 | exonic   | <b>EP300</b>                                                                    | stopgain SNV           | NM_001429:c.A1465T:p.K489X                 |                                | chr22 | 41527574  | 41527574  | A   | T |
| ESCC-F42 | exonic   | <b>EP300</b>                                                                    | nonsynonymous SNV      | NM_001429:c.C2377G:p.Q793E                 |                                | chr22 | 41545177  | 41545177  | C   | G |

|          |                 |                                                                                                                            |                        |                                         |                                |       |           |           |     |   |
|----------|-----------------|----------------------------------------------------------------------------------------------------------------------------|------------------------|-----------------------------------------|--------------------------------|-------|-----------|-----------|-----|---|
| ESCC-F42 | exonic          | TET2                                                                                                                       | stopgain SNV           | NM_001127208:c.C2461T;p.Q821X           |                                | chr4  | 106157560 | 106157560 | C   | T |
| ESCC-F42 | exonic          | FAT1                                                                                                                       | nonsynonymous SNV      | NM_005245:c.G6199A;p.V2067M             |                                | chr4  | 187541541 | 187541541 | C   | T |
| ESCC-F42 | exonic          | ABCA13                                                                                                                     | nonsynonymous SNV      | NM_152701:c.G11152A;p.A3718T            |                                | chr7  | 48413962  | 48413962  | G   | A |
| ESCC-F42 | exonic          | MUC17                                                                                                                      | nonsynonymous SNV      | NM_001040105:c.A3942T;p.E1314D          |                                | chr7  | 100678639 | 100678639 | A   | T |
| ESCC-F42 | splicing        | PTPRZ1(NM_001206839:exon27:c.3928-2A>T,NM_002851:exon28:c.6529-2A>T,NM_001206838:exon28:c.3949-2A>T)                       |                        |                                         |                                | chr7  | 121698852 | 121698852 | A   | T |
| ESCC-F42 | exonic          | ASTN2                                                                                                                      | nonsynonymous SNV      | NM_014010:c.G1201T;p.G401C              |                                | chr9  | 119802167 | 119802167 | C   | A |
| ESCC-F42 | exonic          | TLR7                                                                                                                       | nonsynonymous SNV      | NM_016562:c.C282G;p.194M                |                                | chrX  | 12903909  | 12903909  | C   | G |
| ESCC-F42 | exonic          | DMD                                                                                                                        | nonsynonymous SNV      | NM_004011:c.T2573A;p.L858Q              |                                | chrX  | 31986474  | 31986474  | A   | T |
| ESCC-F42 | exonic          | KIF4A                                                                                                                      | nonsynonymous SNV      | NM_012310:c.A283T;p.T95S                |                                | chrX  | 69516895  | 69516895  | A   | T |
| ESCC-F42 | exonic          | CENPI                                                                                                                      | nonsynonymous SNV      | NM_006733:c.G1495C;p.E499Q              |                                | chrX  | 100395679 | 100395679 | G   | C |
| ESCC-F42 | exonic          | PASD1                                                                                                                      | nonsynonymous SNV      | NM_173493:c.G1554C;p.K518N              |                                | chrX  | 150840771 | 150840771 | G   | C |
| ESCC-F43 | exonic          | LRR1Q3                                                                                                                     | nonsynonymous SNV      | NM_001105659:c.C1168G;p.P390A           |                                | chr1  | 74507447  | 74507447  | G   | C |
| ESCC-F43 | exonic          | TRHDE                                                                                                                      | nonsynonymous SNV      | NM_013381:c.G2602A;p.V868I              |                                | chr12 | 73046163  | 73046163  | G   | A |
| ESCC-F43 | exonic          | DMXL2                                                                                                                      | nonsynonymous SNV      | NM_001174116:c.C2270G;p.S757C           |                                | chr15 | 51828407  | 51828407  | G   | C |
| ESCC-F43 | exonic          | TP53                                                                                                                       | nonsynonymous SNV      | NM_001126115:c.C437A;p.P146H            | 753566;753588;753611;905938;90 | chr17 | 7577105   | 7577105   | G   | T |
| ESCC-F43 | exonic          | CRLF3                                                                                                                      | nonsynonymous SNV      | NM_015986:c.A1216G;p.L406V              |                                | chr17 | 29111318  | 29111318  | T   | C |
| ESCC-F43 | exonic          | MUC16                                                                                                                      | nonsynonymous SNV      | NM_024690:c.C20285A;p.A6762E            |                                | chr19 | 9067161   | 9067161   | G   | T |
| ESCC-F43 | exonic          | ANK2                                                                                                                       | nonsynonymous SNV      | NM_001148:c.C6490G;p.L2164V             |                                | chr4  | 114276264 | 114276264 | C   | G |
| ESCC-F43 | exonic          | ANK2                                                                                                                       | nonsynonymous SNV      | NM_001148:c.C6571G;p.L2191V             |                                | chr4  | 114276345 | 114276345 | C   | G |
| ESCC-F43 | exonic          | ABCA13                                                                                                                     | nonsynonymous SNV      | NM_152701:c.G4075C;p.E1359V             |                                | chr7  | 48313338  | 48313338  | G   | C |
| ESCC-F44 | exonic          | BCO2                                                                                                                       | nonsynonymous SNV      | NM_001256400:c.G160A;p.E54K             |                                | chr11 | 112064378 | 112064378 | G   | A |
| ESCC-F44 | exonic          | FAR2                                                                                                                       | nonsynonymous SNV      | NM_018099:c.G264C;p.Q88H                |                                | chr12 | 29446307  | 29446307  | G   | C |
| ESCC-F44 | exonic          | TP53                                                                                                                       | nonsynonymous SNV      | NM_001126115:c.G428T;p.C143F            | 687596;753566;905938;906871;90 | chr17 | 7577114   | 7577114   | C   | A |
| ESCC-F44 | exonic          | ZNF750                                                                                                                     | nonsynonymous SNV      | NM_024702:c.C938G;p.S313C               |                                | chr17 | 80789393  | 80789393  | G   | C |
| ESCC-F44 | exonic          | ZNF750                                                                                                                     | stopgain SNV           | NM_024702:c.C668G;p.S223X               |                                | chr17 | 80789663  | 80789663  | G   | C |
| ESCC-F44 | exonic          | XIRP2                                                                                                                      | nonsynonymous SNV      | NM_001079810:c.G434T;p.C145F            |                                | chr2  | 167992444 | 167992444 | G   | T |
| ESCC-F44 | exonic          | PTPRK                                                                                                                      | nonsynonymous SNV      | NM_002844:c.G3314C;p.R1105T             |                                | chr6  | 128304460 | 128304460 | C   | G |
| ESCC-F44 | exonic          | GPR112                                                                                                                     | nonsynonymous SNV      | NM_153834:c.G5228C;p.R1743T             |                                | chrX  | 135431093 | 135431093 | G   | C |
| ESCC-F45 | exonic          | CACNA1E                                                                                                                    | nonsynonymous SNV      | NM_001205294:c.C6043T;p.R2015C          |                                | chr1  | 181765824 | 181765824 | C   | T |
| ESCC-F45 | exonic          | HMCN1                                                                                                                      | nonsynonymous SNV      | NM_031935:c.G13158T;p.K4386N            |                                | chr1  | 186099757 | 186099757 | G   | T |
| ESCC-F45 | exonic          | FMN2                                                                                                                       | nonsynonymous SNV      | NM_020066:c.G4702T;p.A1568S             |                                | chr1  | 240497466 | 240497466 | G   | T |
| ESCC-F45 | exonic          | PPF1A1                                                                                                                     | nonsynonymous SNV      | NM_003626:c.G1324A;p.E442K              |                                | chr11 | 70181696  | 70181696  | G   | A |
| ESCC-F45 | exonic          | ARID2                                                                                                                      | nonsynonymous SNV      | NM_152641:c.T947C;p.L316P               |                                | chr12 | 46230698  | 46230698  | T   | C |
| ESCC-F45 | splicing        | TP53(NM_001126117:exon3:c.276+1G>T,NM_001126112:exon7:c.672+1G>T,NM_001126116:exon3:c.276+1G>T,NM_000546:exon7:c.672+1G>T) |                        |                                         | 724868;753566;905938;907276;90 | chr17 | 7578176   | 7578176   | C   | A |
| ESCC-F45 | splicing        | BRP1(NM_032043:exon10:c.1141-1G>C)                                                                                         |                        |                                         |                                | chr17 | 59876661  | 59876661  | C   | G |
| ESCC-F45 | exonic          | ZNF708                                                                                                                     | nonsynonymous SNV      | NM_021269:c.G175A;p.G59R                |                                | chr19 | 21492099  | 21492099  | C   | T |
| ESCC-F45 | exonic          | NFE2L2                                                                                                                     | nonsynonymous SNV      | NM_001145412:c.A182G;p.D61G             | 1571463;1571731;1579543;15809  | chr2  | 178098815 | 178098815 | T   | C |
| ESCC-F45 | exonic          | TIN                                                                                                                        | nonsynonymous SNV      | NM_003319:c.G42063T;p.L4021F            |                                | chr2  | 179441804 | 179441804 | C   | A |
| ESCC-F45 | exonic          | FN1                                                                                                                        | nonsynonymous SNV      | NM_002026:c.G2063C;p.G688A              |                                | chr2  | 216274716 | 216274716 | C   | T |
| ESCC-F45 | exonic          | SPHKAP                                                                                                                     | nonsynonymous SNV      | NM_001142644:c.C1111A;p.H371N           |                                | chr2  | 228884459 | 228884459 | G   | T |
| ESCC-F45 | exonic          | SON                                                                                                                        | nonframeshift deletion | NM_032195:c.6397_6399del;p.2133_2133del |                                | chr21 | 34931611  | 34931613  | GAA | - |
| ESCC-F45 | exonic          | MUC4                                                                                                                       | nonsynonymous SNV      | NM_018406:c.C10357G;p.H3453D            |                                | chr3  | 195508094 | 195508094 | G   | C |
| ESCC-F45 | exonic          | ANK2                                                                                                                       | nonsynonymous SNV      | NM_001148:c.G8011A;p.A2671T             |                                | chr4  | 114277785 | 114277785 | G   | A |
| ESCC-F45 | exonic          | VCAN                                                                                                                       | nonsynonymous SNV      | NM_001164098:c.G1435A;p.E479K           |                                | chr5  | 82815560  | 82815560  | G   | A |
| ESCC-F45 | exonic          | OR2B6                                                                                                                      | nonsynonymous SNV      | NM_012367:c.C434A;p.A145E               |                                | chr6  | 27925452  | 27925452  | C   | A |
| ESCC-F45 | exonic          | NMBR                                                                                                                       | nonsynonymous SNV      | NM_002511:c.C305T;p.S102L               | 1474876                        | chr6  | 142409491 | 142409491 | G   | A |
| ESCC-F45 | exonic          | MUC17                                                                                                                      | nonsynonymous SNV      | NM_001040105:c.C6569T;p.T2190I          |                                | chr7  | 100681266 | 100681266 | C   | T |
| ESCC-F45 | exonic          | BRAF                                                                                                                       | nonsynonymous SNV      | NM_004333:c.G469A;p.V157I               |                                | chr7  | 140534444 | 140534444 | C   | T |
| ESCC-F46 | exonic          | CACNA1E                                                                                                                    | nonsynonymous SNV      | NM_001205294:c.G6671A;p.R2224Q          |                                | chr1  | 181767885 | 181767885 | G   | A |
| ESCC-F46 | exonic;splicing | FAT3;FAT3                                                                                                                  | nonsynonymous SNV      | NM_001008781:c.G3293A;p.G1098E          |                                | chr11 | 92257800  | 92257800  | G   | A |
| ESCC-F46 | exonic          | ARID2                                                                                                                      | nonsynonymous SNV      | NM_152641:c.C3340A;p.Q1114K             |                                | chr12 | 46245246  | 46245246  | C   | A |
| ESCC-F46 | exonic          | ABCC12                                                                                                                     | nonsynonymous SNV      | NM_033226:c.A3253T;p.T1085S             |                                | chr16 | 48125063  | 48125063  | T   | A |
| ESCC-F46 | exonic          | TP53                                                                                                                       | nonsynonymous SNV      | NM_001126115:c.G404C;p.R135P            | 687794;753566;905938;907276;90 | chr17 | 7577138   | 7577138   | G   | C |
| ESCC-F46 | exonic          | MUC16                                                                                                                      | nonsynonymous SNV      | NM_024690:c.G17371A;p.E5791K            |                                | chr19 | 9070075   | 9070075   | C   | T |
| ESCC-F46 | exonic          | MSH6                                                                                                                       | nonsynonymous SNV      | NM_000179:c.G1870A;p.G624S              | 753548;1482074                 | chr2  | 48026992  | 48026992  | G   | A |
| ESCC-F46 | exonic          | TRIO                                                                                                                       | nonsynonymous SNV      | NM_007118:c.G6545A;p.R2182H             |                                | chr5  | 14482770  | 14482770  | G   | A |
| ESCC-F46 | exonic          | GPR98                                                                                                                      | nonsynonymous SNV      | NM_032119:c.C9816G;p.F3272L             |                                | chr5  | 90020716  | 90020716  | C   | G |
| ESCC-F46 | exonic          | HIST1HC                                                                                                                    | frameshift deletion    | NM_005319:c.89delG;p.G30fs              |                                | chr6  | 26056568  | 26056568  | C   | - |
| ESCC-F46 | exonic          | MLL3                                                                                                                       | stopgain SNV           | NM_170606:c.C4439G;p.S1480X             |                                | chr7  | 151891593 | 151891593 | G   | C |
| ESCC-F46 | exonic          | VPS13B                                                                                                                     | nonsynonymous SNV      | NM_017890:c.G5381C;p.S1794T             |                                | chr8  | 100654124 | 100654124 | G   | C |
| ESCC-F46 | exonic          | CSMD3                                                                                                                      | nonsynonymous SNV      | NM_052900:c.C2542A;p.H848N              |                                | chr8  | 113668533 | 113668533 | G   | T |
| ESCC-F47 | exonic          | SIPA1L2                                                                                                                    | frameshift deletion    | NM_020808:c.4116_4117del;p.1372_1373del |                                | chr1  | 232568132 | 232568133 | GAA | - |
| ESCC-F47 | exonic          | CUBN                                                                                                                       | nonsynonymous SNV      | NM_001081:c.C5395A;p.R1799S             |                                | chr10 | 16982184  | 16982184  | G   | T |
| ESCC-F47 | exonic          | TP53                                                                                                                       | nonsynonymous SNV      | NM_001126118:c.T221C;p.F74S             | 724838;905938;906803;907276;90 | chr17 | 7579349   | 7579349   | A   | G |
| ESCC-F47 | exonic          | SPECC1                                                                                                                     | nonsynonymous SNV      | NM_001033555:c.C2186A;p.S729Y           |                                | chr17 | 20149316  | 20149316  | C   | A |
| ESCC-F47 | exonic          | DNAH9                                                                                                                      | frameshift deletion    | NM_001372:c.6324delC;p.D2108fs          |                                | chr17 | 11648326  | 11648326  | C   | - |
| ESCC-F47 | exonic          | ZC3H6                                                                                                                      | nonsynonymous SNV      | NM_198581:c.T637G;p.F213V               |                                | chr2  | 113069404 | 113069404 | T   | G |
| ESCC-F47 | exonic          | FN1                                                                                                                        | nonsynonymous SNV      | NM_002026:c.C4867A;p.P1623T             |                                | chr2  | 216246959 | 216246959 | G   | T |
| ESCC-F47 | exonic          | ADD1                                                                                                                       | nonsynonymous SNV      | NM_001119:c.A905G;p.H302R               |                                | chr4  | 2900179   | 2900179   | A   | G |
| ESCC-F47 | exonic          | CNOT6L                                                                                                                     | nonsynonymous SNV      | NM_144571:c.C1660T;p.R554W              |                                | chr4  | 78641593  | 78641593  | G   | A |
| ESCC-F47 | exonic          | BCOR                                                                                                                       | nonsynonymous SNV      | NM_001123383:c.C2983G;p.Q995E           |                                | chrX  | 39931616  | 39931616  | G   | C |

|          |                 |                                                                                                                                                                                            |                      |                                                |                                |       |           |           |   |   |
|----------|-----------------|--------------------------------------------------------------------------------------------------------------------------------------------------------------------------------------------|----------------------|------------------------------------------------|--------------------------------|-------|-----------|-----------|---|---|
| ESCC-F48 | exonic          | <i>FAM46C</i>                                                                                                                                                                              | nonsynonymous SNV    | NM_017709:c.G565T;p.D189Y                      |                                | chr1  | 118166055 | 118166055 | G | T |
| ESCC-F48 | exonic          | <i>TP53</i>                                                                                                                                                                                | nonsynonymous SNV    | NM_001126115:c.A182T;p.H61L                    | 753573;905938;906851;907059;90 | chr17 | 7578271   | 7578271   | T | A |
| ESCC-F48 | exonic          | <i>ZNF676</i>                                                                                                                                                                              | nonsynonymous SNV    | NM_001001411:c.C698A;p.A233D                   |                                | chr19 | 22363821  | 22363821  | G | T |
| ESCC-F48 | exonic          | <i>IFT172</i>                                                                                                                                                                              | nonsynonymous SNV    | NM_015662:c.G3936T;p.E1312D                    |                                | chr2  | 27676266  | 27676266  | C | A |
| ESCC-F48 | exonic          | <i>NFE2L2</i>                                                                                                                                                                              | nonsynonymous SNV    | NM_001145412:c.C52G;p.R18G                     | 1571458;1579693;1604883        | chr2  | 178098945 | 178098945 | G | C |
| ESCC-F48 | exonic          | <i>MATN4</i>                                                                                                                                                                               | nonsynonymous SNV    | NM_030592:c.G1088A;p.R363H                     |                                | chr20 | 43926902  | 43926902  | C | T |
| ESCC-F48 | exonic          | <i>LAMB2</i>                                                                                                                                                                               | nonsynonymous SNV    | NM_002292:c.C4846T;p.R1616W                    |                                | chr3  | 49159454  | 49159454  | G | A |
| ESCC-F48 | exonic          | <i>MYH15</i>                                                                                                                                                                               | nonsynonymous SNV    | NM_014981:c.G2144A;p.R715K                     |                                | chr3  | 108175667 | 108175667 | C | T |
| ESCC-F48 | exonic          | <i>DSPP</i>                                                                                                                                                                                | nonsynonymous SNV    | NM_014208:c.G2737A;p.D913N                     |                                | chr4  | 88536551  | 88536551  | G | A |
| ESCC-F48 | exonic          | <i>PCDH9</i>                                                                                                                                                                               | unknown              | UNKNOWN                                        |                                | chr5  | 140569145 | 140569145 | G | A |
| ESCC-F48 | exonic          | <i>CSMD3</i>                                                                                                                                                                               | nonsynonymous SNV    | NM_052900:c.G1804A;p.E602K                     |                                | chr8  | 113702136 | 113702136 | C | T |
| ESCC-F48 | exonic;splicing | <i>OXR1;OXR1</i>                                                                                                                                                                           | frameshift insertion | NM_181354:c.200_201insCp.D67fs                 |                                | chr8  | 107691438 | 107691438 | - | C |
| ESCC-F49 | exonic          | <i>TP53</i>                                                                                                                                                                                | nonsynonymous SNV    | NM_001126115:c.T141G;p.H47Q                    | 684059;905938;906869;907276;90 | chr17 | 7578393   | 7578393   | A | C |
| ESCC-F49 | exonic          | <i>TRAP</i>                                                                                                                                                                                | nonsynonymous SNV    | NM_005879:c.G1359T;p.K453N                     |                                | chr3  | 49866587  | 49866587  | C | A |
| ESCC-F49 | exonic          | <i>FK3CA</i>                                                                                                                                                                               | frameshift insertion | NM_006218:c.3201_3202insA;p.L1067fs            |                                | chr3  | 178952146 | 178952146 | - | A |
| ESCC-F50 | exonic          | <i>ZNF643</i>                                                                                                                                                                              | nonsynonymous SNV    | NM_023070:c.G838C;p.E280Q                      |                                | chr1  | 40928494  | 40928494  | G | C |
| ESCC-F50 | exonic          | <i>KIAA1804</i>                                                                                                                                                                            | nonsynonymous SNV    | NM_032435:c.C1033T;p.R345W                     |                                | chr1  | 233489599 | 233489599 | C | T |
| ESCC-F50 | exonic          | <i>MLL2</i>                                                                                                                                                                                | stopgain SNV         | NM_003482:c.C11938T;p.Q3980X                   |                                | chr12 | 49426550  | 49426550  | G | A |
| ESCC-F50 | exonic          | <i>MYO16</i>                                                                                                                                                                               | nonsynonymous SNV    | NM_001198950:c.G1885A;p.E629K                  |                                | chr13 | 109562458 | 109562458 | G | A |
| ESCC-F50 | exonic          | <i>SLFN1</i>                                                                                                                                                                               | nonsynonymous SNV    | NM_152270:c.C2397G;p.F799L                     |                                | chr17 | 33679684  | 33679684  | G | C |
| ESCC-F50 | exonic          | <i>MED13</i>                                                                                                                                                                               | nonsynonymous SNV    | NM_005121:c.G1213A;p.A405T                     |                                | chr17 | 60106972  | 60106972  | C | T |
| ESCC-F50 | exonic          | <i>TP53</i>                                                                                                                                                                                | frameshift deletion  | NM_000546:c.112delC;p.Q38fs                    | 905938;907276;909707;946371;13 | chr17 | 7579575   | 7579575   | - | C |
| ESCC-F50 | exonic          | <i>MUC16</i>                                                                                                                                                                               | nonsynonymous SNV    | NM_024690:c.C39724T;p.R13242C                  |                                | chr19 | 9005682   | 9005682   | G | A |
| ESCC-F50 | exonic          | <i>FBXO11</i>                                                                                                                                                                              | stopgain SNV         | NM_001190274:c.2740_2741insTp.D914_S915delinsX | 753548                         | chr2  | 48035301  | 48035301  | - | A |
| ESCC-F50 | exonic          | <i>PMS1</i>                                                                                                                                                                                | nonsynonymous SNV    | NM_001128143:c.G2191C;p.E731Q                  |                                | chr2  | 190728920 | 190728920 | G | C |
| ESCC-F50 | exonic          | <i>GOLGB1</i>                                                                                                                                                                              | nonsynonymous SNV    | NM_001256488:c.G4819T;p.A1607S                 |                                | chr3  | 121414311 | 121414311 | C | A |
| ESCC-F50 | exonic          | <i>IGSF10</i>                                                                                                                                                                              | stopgain SNV         | NM_178822:c.C818G;p.S273X                      |                                | chr3  | 151166951 | 151166951 | G | C |
| ESCC-F50 | exonic          | <i>GPR98</i>                                                                                                                                                                               | nonsynonymous SNV    | NM_032119:c.G12460A;p.A4154T                   |                                | chr5  | 90072326  | 90072326  | G | A |
| ESCC-F50 | exonic          | <i>FAT2</i>                                                                                                                                                                                | frameshift insertion | NM_001447:c.6750_6751insTp.L2250fs             |                                | chr5  | 150923938 | 150923938 | - | A |
| ESCC-F50 | exonic          | <i>LAMA2</i>                                                                                                                                                                               | nonsynonymous SNV    | NM_001079823:c.G8369C;p.R2790T                 |                                | chr6  | 129824259 | 129824259 | G | C |
| ESCC-F50 | exonic          | <i>RIMS2</i>                                                                                                                                                                               | nonsynonymous SNV    | NM_014677:c.G430A;p.D144N                      |                                | chr8  | 104897833 | 104897833 | G | A |
| ESCC-F50 | exonic          | <i>CSMD3</i>                                                                                                                                                                               | nonsynonymous SNV    | NM_052900:c.C4003G;p.L1335V                    |                                | chr8  | 113564869 | 113564869 | G | C |
| ESCC-F50 | exonic          | <i>ADCY8</i>                                                                                                                                                                               | nonsynonymous SNV    | NM_001115:c.T2083A;p.F695I                     |                                | chr8  | 131896836 | 131896836 | A | T |
| ESCC-F51 | exonic          | <i>NOTCH2</i>                                                                                                                                                                              | nonsynonymous SNV    | NM_001200001:c.T391C;p.C131R                   |                                | chr1  | 120547976 | 120547976 | A | G |
| ESCC-F51 | exonic          | <i>WDR64</i>                                                                                                                                                                               | nonsynonymous SNV    | NM_144625:c.G577A;p.A193T                      |                                | chr1  | 241842880 | 241842880 | G | A |
| ESCC-F51 | splicing        | <i>ITLTD1(NM_001145727:exon2:c.58+IG&gt;T)</i>                                                                                                                                             |                      |                                                |                                | chr12 | 25801427  | 25801427  | C | A |
| ESCC-F51 | exonic          | <i>TRHDE</i>                                                                                                                                                                               | nonsynonymous SNV    | NM_013381:c.C2331G;p.F777L                     |                                | chr12 | 73012815  | 73012815  | C | G |
| ESCC-F51 | exonic          | <i>KLHL1</i>                                                                                                                                                                               | nonsynonymous SNV    | NM_020866:c.G869A;p.C290Y                      |                                | chr13 | 70514317  | 70514317  | C | T |
| ESCC-F51 | exonic          | <i>SYNE2</i>                                                                                                                                                                               | nonsynonymous SNV    | NM_015180:c.T10159C;p.S3387P                   |                                | chr14 | 64529560  | 64529560  | T | C |
| ESCC-F51 | exonic          | <i>ABCA9</i>                                                                                                                                                                               | nonsynonymous SNV    | NM_080283:c.G2170C;p.E724Q                     |                                | chr17 | 67020466  | 67020466  | C | G |
| ESCC-F51 | exonic          | <i>ZNF750</i>                                                                                                                                                                              | stopgain SNV         | NM_024702:c.C668G;p.S223X                      |                                | chr17 | 80789663  | 80789663  | G | C |
| ESCC-F51 | exonic          | <i>SLC8A1</i>                                                                                                                                                                              | nonsynonymous SNV    | NM_001112801:c.G2417T;p.G806V                  |                                | chr2  | 40366630  | 40366630  | C | A |
| ESCC-F51 | exonic          | <i>SLC8A1</i>                                                                                                                                                                              | nonsynonymous SNV    | NM_001112801:c.G2347C;p.E783Q                  |                                | chr2  | 40366700  | 40366700  | G | C |
| ESCC-F51 | exonic          | <i>XIRP2</i>                                                                                                                                                                               | nonsynonymous SNV    | NM_001199144:c.G3961C;p.E1321Q                 |                                | chr2  | 168102529 | 168102529 | G | C |
| ESCC-F51 | exonic          | <i>CDH10</i>                                                                                                                                                                               | nonsynonymous SNV    | NM_006727:c.T58C;p.C20R                        |                                | chr5  | 24593542  | 24593542  | A | G |
| ESCC-F51 | exonic          | <i>C5orf42</i>                                                                                                                                                                             | nonsynonymous SNV    | NM_023073:c.C7157G;p.P2386R                    |                                | chr5  | 37168969  | 37168969  | G | C |
| ESCC-F51 | exonic          | <i>VCAN</i>                                                                                                                                                                                | stopgain SNV         | NM_001164097:c.C2542T;p.Q848X                  |                                | chr5  | 82834325  | 82834325  | C | T |
| ESCC-F51 | exonic          | <i>VCAN</i>                                                                                                                                                                                | nonsynonymous SNV    | NM_001164097:c.G5347C;p.E1783Q                 |                                | chr5  | 82837130  | 82837130  | G | C |
| ESCC-F51 | exonic          | <i>APC</i>                                                                                                                                                                                 | nonsynonymous SNV    | NM_001127511:c.G4324A;p.A1442T                 | 994673;1109799;1136382         | chr5  | 112175669 | 112175669 | G | A |
| ESCC-F51 | splicing        | <i>BAI3(NM_001704:exon25:c.3189-2A&gt;G)</i>                                                                                                                                               |                      |                                                |                                | chr6  | 70048806  | 70048806  | A | G |
| ESCC-F51 | exonic          | <i>SYNE1</i>                                                                                                                                                                               | nonsynonymous SNV    | NM_033071:c.G24778A;p.E8260K                   |                                | chr6  | 152466676 | 152466676 | C | T |
| ESCC-F51 | exonic          | <i>SYNE1</i>                                                                                                                                                                               | stopgain SNV         | NM_033071:c.C6659G;p.S2220X                    |                                | chr6  | 152728234 | 152728234 | G | C |
| ESCC-F51 | exonic          | <i>RAPGEF5</i>                                                                                                                                                                             | nonsynonymous SNV    | NM_012294:c.C743T;p.T248I                      |                                | chr7  | 22232987  | 22232987  | G | A |
| ESCC-F51 | exonic          | <i>TMEM2</i>                                                                                                                                                                               | nonsynonymous SNV    | NM_001135820:c.G1711A;p.D571N                  |                                | chr9  | 74345043  | 74345043  | C | T |
| ESCC-F51 | exonic          | <i>FANCC</i>                                                                                                                                                                               | nonsynonymous SNV    | NM_000136:c.C786G;p.I262M                      |                                | chr9  | 97897685  | 97897685  | G | C |
| ESCC-F51 | exonic          | <i>FAM47C</i>                                                                                                                                                                              | nonsynonymous SNV    | NM_001013736:c.G1402A;p.E468K                  |                                | chrX  | 37027885  | 37027885  | G | A |
| ESCC-F51 | exonic          | <i>KDM6A</i>                                                                                                                                                                               | nonsynonymous SNV    | NM_021140:c.G3724C;p.G1242R                    | 724870;749715;946354           | chrX  | 44949163  | 44949163  | G | C |
| ESCC-F51 | exonic          | <i>HUWE1</i>                                                                                                                                                                               | nonsynonymous SNV    | NM_031407:c.C4066A;p.P1356T                    |                                | chrX  | 53617989  | 53617989  | G | T |
| ESCC-F52 | splicing        | <i>VPS13D(NM_018156:exon68:c.12720-1G&gt;A;NM_015378:exon69:c.12795-1G&gt;A)</i>                                                                                                           |                      |                                                |                                | chr1  | 12566906  | 12566906  | G | A |
| ESCC-F52 | exonic          | <i>CRB1</i>                                                                                                                                                                                | nonsynonymous SNV    | NM_001193640:c.G2641C;p.E881Q                  |                                | chr1  | 197403970 | 197403970 | G | C |
| ESCC-F52 | exonic          | <i>C1orf65</i>                                                                                                                                                                             | nonsynonymous SNV    | NM_152610:c.G1831C;p.E611Q                     |                                | chr1  | 223568648 | 223568648 | C | C |
| ESCC-F52 | exonic          | <i>CDH23</i>                                                                                                                                                                               | nonsynonymous SNV    | NM_001171930:c.G3439A;p.G1147S                 |                                | chr10 | 73485137  | 73485137  | G | A |
| ESCC-F52 | exonic          | <i>LRP1</i>                                                                                                                                                                                | nonsynonymous SNV    | NM_002332:c.C4895G;p.S1632C                    |                                | chr12 | 57573268  | 57573268  | C | G |
| ESCC-F52 | splicing        | <i>PPP1A2(NM_001220473:exon28:c.3213-2A&gt;-;NM_003625:exon29:c.3213-2A&gt;-;NM_001220475:exon27:c.3150-2A&gt;-;NM_001220474:exon28:c.3168-2A&gt;-;NM_001220480:exon18:c.3168-2A&gt;-)</i> |                      |                                                |                                | chr12 | 81671195  | 81671195  | T | C |
| ESCC-F52 | exonic          | <i>AKAP6</i>                                                                                                                                                                               | nonsynonymous SNV    | NM_004274:c.A6458C;p.E2153A                    |                                | chr14 | 33293477  | 33293477  | A | C |
| ESCC-F52 | exonic          | <i>SLTM</i>                                                                                                                                                                                | nonsynonymous SNV    | NM_001013843:c.G1999A;p.E667K                  |                                | chr15 | 59182506  | 59182506  | C | T |
| ESCC-F52 | exonic          | <i>SLC43A2</i>                                                                                                                                                                             | nonsynonymous SNV    | NM_152346:c.C557T;p.S186F                      |                                | chr17 | 1496518   | 1496518   | G | A |
| ESCC-F52 | exonic          | <i>TP53</i>                                                                                                                                                                                | stopgain SNV         | NM_001126115:c.G265T;p.E89X                    | 905938;907276;909707;946371;13 | chr17 | 7578188   | 7578188   | C | T |
| ESCC-F52 | exonic          | <i>LRP1B</i>                                                                                                                                                                               | nonsynonymous SNV    | NM_018557:c.G4947C;p.Q1649H                    |                                | chr2  | 141598654 | 141598654 | C | G |
| ESCC-F52 | exonic          | <i>TIN</i>                                                                                                                                                                                 | nonsynonymous SNV    | NM_133378:c.C23693T;p.S7898L                   |                                | chr2  | 179577224 | 179577224 | G | A |
| ESCC-F52 | exonic          | <i>MAP2</i>                                                                                                                                                                                | nonsynonymous SNV    | NM_002574:c.G2779A;p.D927N                     |                                | chr2  | 210559673 | 210559673 | G | A |



|          |          |                                                                                                                                                                             |                      |                                       |                                |       |           |           |     |   |
|----------|----------|-----------------------------------------------------------------------------------------------------------------------------------------------------------------------------|----------------------|---------------------------------------|--------------------------------|-------|-----------|-----------|-----|---|
| ESCC-F52 | exonic   | <i>PBRM1</i>                                                                                                                                                                | nonsynonymous SNV    | NM_018313:c.T1738C:p.Y580H            |                                | chr3  | 52651358  | 52651358  | A   | G |
| ESCC-F52 | exonic   | <i>DNAH5</i>                                                                                                                                                                | stopgain SNV         | NM_001369:c.G7771T:p.E2591X           |                                | chr5  | 13807816  | 13807816  | C   | A |
| ESCC-F52 | exonic   | <i>MLL3</i>                                                                                                                                                                 | stopgain SNV         | NM_170606:c.C5668T:p.R1890X           |                                | chr7  | 151879277 | 151879277 | G   | A |
| ESCC-F52 | exonic   | <i>MAGEC1</i>                                                                                                                                                               | frameshift insertion | NM_005462:c.1457_1458insA:p.S486fs    |                                | chrX  | 140994647 | 140994647 | -   | A |
| ESCC-F53 | exonic   | <i>LRN2</i>                                                                                                                                                                 | nonsynonymous SNV    | NM_201630:c.G160A:p.D54N              |                                | chr1  | 204588961 | 204588961 | C   | T |
| ESCC-F53 | exonic   | <i>CUBN</i>                                                                                                                                                                 | nonsynonymous SNV    | NM_001081:c.C6182T:p.P2061L           |                                | chr10 | 16970245  | 16970245  | G   | A |
| ESCC-F53 | exonic   | <i>KLHL1</i>                                                                                                                                                                | nonsynonymous SNV    | NM_020866:c.G1820A:p.G607D            |                                | chr13 | 70293696  | 70293696  | C   | T |
| ESCC-F53 | exonic   | <i>RB1</i>                                                                                                                                                                  | frameshift insertion | NM_000321:c.282_283insA:p.K94fs       | 905951:906844:907072:908123:90 | chr13 | 48916752  | 48916752  | -   | A |
| ESCC-F53 | exonic   | <i>TRIO</i>                                                                                                                                                                 | nonsynonymous SNV    | NM_007118:c.G5215A:p.V1739I           |                                | chr5  | 14461139  | 14461139  | G   | A |
| ESCC-F53 | exonic   | <i>MCC</i>                                                                                                                                                                  | stopgain SNV         | NM_002387:c.C298T:p.Q100X             |                                | chr5  | 112478931 | 112478931 | G   | A |
| ESCC-F53 | exonic   | <i>ZNF92</i>                                                                                                                                                                | nonsynonymous SNV    | NM_007139:c.A56C:p.E19A               |                                | chr7  | 64863290  | 64863290  | A   | C |
| ESCC-F53 | exonic   | <i>NOTCH1</i>                                                                                                                                                               | nonsynonymous SNV    | NM_017617:c.G1367A:p.C456Y            |                                | chr9  | 139412278 | 139412278 | C   | T |
| ESCC-F53 | exonic   | <i>GRIA3</i>                                                                                                                                                                | nonsynonymous SNV    | NM_000828:c.G2416A:p.G806S            |                                | chrX  | 122599616 | 122599616 | G   | A |
| ESCC-F54 | exonic   | <i>MYO3A</i>                                                                                                                                                                | nonsynonymous SNV    | NM_017433:c.C2780T:p.A927V            |                                | chr10 | 26443739  | 26443739  | C   | T |
| ESCC-F54 | exonic   | <i>MUC2</i>                                                                                                                                                                 | nonsynonymous SNV    | NM_002457:c.A3965G:p.D1322G           |                                | chr11 | 1092146   | 1092146   | A   | G |
| ESCC-F54 | exonic   | <i>PPFIA2</i>                                                                                                                                                               | stopgain SNV         | NM_001220479:c.C457T:p.R153X          |                                | chr12 | 81751878  | 81751878  | G   | A |
| ESCC-F54 | exonic   | <i>NACA</i>                                                                                                                                                                 | frameshift insertion | NM_001113203:c.897_898insC:p.P299fs   |                                | chr12 | 57114417  | 57114417  | -   | G |
| ESCC-F54 | exonic   | <i>MYH6</i>                                                                                                                                                                 | nonsynonymous SNV    | NM_002471:c.C2540T:p.T847M            |                                | chr14 | 23863422  | 23863422  | G   | A |
| ESCC-F54 | exonic   | <i>LRP2</i>                                                                                                                                                                 | nonsynonymous SNV    | NM_004525:c.G5645A:p.R1882H           |                                | chr2  | 170076967 | 170076967 | C   | T |
| ESCC-F54 | exonic   | <i>ZNF831</i>                                                                                                                                                               | nonsynonymous SNV    | NM_178457:c.C2957G:p.T986S            |                                | chr20 | 57769031  | 57769031  | C   | G |
| ESCC-F54 | exonic   | <i>SORBS2</i>                                                                                                                                                               | nonsynonymous SNV    | NM_001145674:c.G749A:p.R250Q          |                                | chr4  | 186545534 | 186545534 | C   | T |
| ESCC-F54 | exonic   | <i>DGKB</i>                                                                                                                                                                 | nonsynonymous SNV    | NM_004080:c.G1866T:p.E622D            |                                | chr7  | 14384989  | 14384989  | C   | A |
| ESCC-F54 | exonic   | <i>FAM135B</i>                                                                                                                                                              | nonsynonymous SNV    | NM_015912:c.G145A:p.A49T              |                                | chr8  | 139323096 | 139323096 | C   | T |
| ESCC-F54 | exonic   | <i>COL22A1</i>                                                                                                                                                              | stopgain SNV         | NM_152888:c.A1783T:p.K595X            |                                | chr8  | 139788229 | 139788229 | T   | A |
| ESCC-F54 | exonic   | <i>PLEC</i>                                                                                                                                                                 | nonsynonymous SNV    | NM_201378:c.C13216T:p.R4406C          |                                | chr8  | 144990731 | 144990731 | G   | A |
| ESCC-F54 | exonic   | <i>PLEC</i>                                                                                                                                                                 | nonsynonymous SNV    | NM_201378:c.C12554T:p.S4185F          |                                | chr8  | 144991393 | 144991393 | G   | A |
| ESCC-F54 | splicing | <i>CDKN2A(NM_058195:exon3:c.194-1G&gt;-A,NM_058197:exon3:c.425-1G&gt;-A,NM_001195132:exon3:c.151-1G&gt;-A,NM_000077:exon3:c.151-1G&gt;-A)</i>                               |                      |                                       | 684052:687455:687457:687563:68 | chr9  | 21971208  | 21971208  | C   | T |
| ESCC-F55 | exonic   | <i>CHD1L</i>                                                                                                                                                                | nonsynonymous SNV    | NM_001256338:c.G577A:p.V193M          |                                | chr1  | 146743861 | 146743861 | G   | A |
| ESCC-F55 | exonic   | <i>KLHL20</i>                                                                                                                                                               | nonsynonymous SNV    | NM_014458:c.G1053C:p.M351I            |                                | chr1  | 173726200 | 173726200 | G   | C |
| ESCC-F55 | exonic   | <i>ATRN1</i>                                                                                                                                                                | nonsynonymous SNV    | NM_207303:c.G2341A:p.G781R            |                                | chr10 | 117045833 | 117045833 | G   | A |
| ESCC-F55 | splicing | <i>SLC1A2(NM_004171:exon9:c.1286+1G&gt;-T,NM_001252652:exon10:c.1259+1G&gt;-T,NM_001195728:exon10:c.1259+1G&gt;-T)</i>                                                      |                      |                                       |                                | chr11 | 35308303  | 35308303  | C   | A |
| ESCC-F55 | exonic   | <i>ARID2</i>                                                                                                                                                                | nonsynonymous SNV    | NM_152641:c.G2644T:p.G882C            |                                | chr12 | 46244550  | 46244550  | G   | T |
| ESCC-F55 | exonic   | <i>UBN1</i>                                                                                                                                                                 | nonsynonymous SNV    | NM_016936:c.C2263A:p.P755T            |                                | chr16 | 4924674   | 4924674   | C   | A |
| ESCC-F55 | exonic   | <i>SPECC1</i>                                                                                                                                                               | nonsynonymous SNV    | NM_001033555:c.G2956A:p.E986K         |                                | chr17 | 20217370  | 20217370  | G   | A |
| ESCC-F55 | exonic   | <i>ABCA9</i>                                                                                                                                                                | nonsynonymous SNV    | NM_080283:c.G1964C:p.R655P            |                                | chr17 | 67023203  | 67023203  | C   | G |
| ESCC-F55 | splicing | <i>TP53(NM_001126112:exon5:c.375+1G&gt;-NM_000546:exon5:c.375+1G&gt;-NM_001126113:exon5:c.375+1G&gt;-NM_001126118:exon4:c.258+1G&gt;-NM_000598:907276:909707:946371:13)</i> |                      |                                       | 905938:907276:909707:946371:13 | chr17 | 7579311   | 7579311   | C   | T |
| ESCC-F55 | exonic   | <i>MUC16</i>                                                                                                                                                                | nonsynonymous SNV    | NM_024690:c.C28121A:p.S9374Y          |                                | chr19 | 9059325   | 9059325   | G   | T |
| ESCC-F55 | exonic   | <i>DNAH6</i>                                                                                                                                                                | nonsynonymous SNV    | NM_001370:c.G58A:p.E20K               |                                | chr2  | 84745008  | 84745008  | G   | A |
| ESCC-F55 | exonic   | <i>SLC4A10</i>                                                                                                                                                              | nonsynonymous SNV    | NM_001178015:c.G574T:p.A192S          |                                | chr2  | 162711637 | 162711637 | G   | T |
| ESCC-F55 | exonic   | <i>LRP2</i>                                                                                                                                                                 | nonsynonymous SNV    | NM_004525:c.C6523T:p.R2175W           |                                | chr2  | 170063707 | 170063707 | G   | A |
| ESCC-F55 | exonic   | <i>MAP2</i>                                                                                                                                                                 | nonsynonymous SNV    | NM_031845:c.C731G:p.A244G             |                                | chr2  | 210574704 | 210574704 | C   | G |
| ESCC-F55 | splicing | <i>MCC(NM_001085377:exon15:c.2030-2A&gt;-T,NM_002387:exon13:c.1460-2A&gt;-T)</i>                                                                                            |                      |                                       |                                | chr5  | 112399866 | 112399866 | T   | A |
| ESCC-F55 | exonic   | <i>FNIP1</i>                                                                                                                                                                | nonsynonymous SNV    | NM_001008738:c.C2368T:p.P790S         |                                | chr5  | 131007685 | 131007685 | G   | A |
| ESCC-F55 | exonic   | <i>PCDHB1</i>                                                                                                                                                               | nonsynonymous SNV    | NM_013340:c.A2066C:p.K689T            |                                | chr5  | 140433121 | 140433121 | A   | C |
| ESCC-F55 | exonic   | <i>PCLO</i>                                                                                                                                                                 | nonsynonymous SNV    | NM_014510:c.G11587A:p.E3863K          |                                | chr7  | 82545715  | 82545715  | C   | T |
| ESCC-F55 | exonic   | <i>PCLO</i>                                                                                                                                                                 | nonsynonymous SNV    | NM_014510:c.G610C:p.E204Q             |                                | chr7  | 82785347  | 82785347  | C   | G |
| ESCC-F56 | exonic   | <i>RB1</i>                                                                                                                                                                  | stopgain SNV         | NM_000321:c.C526T:p.Q176X             | 905951:906844:907072:908123:90 | chr13 | 48921986  | 48921986  | C   | T |
| ESCC-F56 | exonic   | <i>MYO16</i>                                                                                                                                                                | nonsynonymous SNV    | NM_001198950:c.A3169G:p.T1057A        |                                | chr13 | 109707777 | 109707777 | A   | G |
| ESCC-F56 | exonic   | <i>TP53</i>                                                                                                                                                                 | stopgain SNV         | NM_001126115:c.C241T:p.R81X           | 687983:905938:905971:907000:90 | chr17 | 7578212   | 7578212   | G   | A |
| ESCC-F56 | exonic   | <i>TIN</i>                                                                                                                                                                  | nonsynonymous SNV    | NM_133379:c.C15847A:p.P5283T          |                                | chr2  | 179611280 | 179611280 | G   | T |
| ESCC-F56 | exonic   | <i>ADRBK2</i>                                                                                                                                                               | nonsynonymous SNV    | NM_005160:c.G1316A:p.C439Y            |                                | chr22 | 26100164  | 26100164  | G   | A |
| ESCC-F56 | exonic   | <i>KIT</i>                                                                                                                                                                  | nonsynonymous SNV    | NM_000222:c.C839T:p.A280V             |                                | chr4  | 55569972  | 55569972  | C   | T |
| ESCC-F56 | exonic   | <i>FAT1</i>                                                                                                                                                                 | frameshift deletion  | NM_005245:c.2128_2129del:p.710_710del |                                | chr4  | 187628853 | 187628854 | TT  | - |
| ESCC-F56 | exonic   | <i>GPR98</i>                                                                                                                                                                | nonsynonymous SNV    | NM_032119:c.T2146C:p.F716L            |                                | chr5  | 89933671  | 89933671  | T   | C |
| ESCC-F56 | exonic   | <i>DGKB</i>                                                                                                                                                                 | nonsynonymous SNV    | NM_004080:c.C677T:p.T226M             |                                | chr7  | 14733734  | 14733734  | G   | A |
| ESCC-F56 | exonic   | <i>NCOA2</i>                                                                                                                                                                | nonsynonymous SNV    | NM_006540:c.A280G:p.194V              |                                | chr8  | 71087074  | 71087074  | T   | C |
| ESCC-F57 | exonic   | <i>TECTA</i>                                                                                                                                                                | nonsynonymous SNV    | NM_005422:c.G2507A:p.R836Q            |                                | chr11 | 121000486 | 121000486 | G   | A |
| ESCC-F57 | exonic   | <i>ML2</i>                                                                                                                                                                  | nonsynonymous SNV    | NM_003482:c.C1075T:p.R359C            |                                | chr12 | 49446735  | 49446735  | G   | A |
| ESCC-F57 | exonic   | <i>MED13L</i>                                                                                                                                                               | nonsynonymous SNV    | NM_015335:c.C2917T:p.R973W            |                                | chr12 | 116434360 | 116434360 | G   | A |
| ESCC-F57 | exonic   | <i>UBN1</i>                                                                                                                                                                 | nonsynonymous SNV    | NM_016936:c.A503C:p.Q168P             |                                | chr16 | 4909096   | 4909096   | A   | C |
| ESCC-F57 | exonic   | <i>PHKB</i>                                                                                                                                                                 | nonsynonymous SNV    | NM_000293:c.T1814C:p.1605T            |                                | chr16 | 47684471  | 47684471  | T   | C |
| ESCC-F57 | splicing | <i>TP53(NM_001126112:exon3:c.164-1G&gt;-A,NM_001126112:exon7:c.560-1G&gt;-A,NM_001126116:exon3:c.164-1G&gt;-A,NM_000546:exon7:c.560-1G&gt;-A)</i>                           |                      |                                       | 905938:907276:909707:946371:13 | chr17 | 7578290   | 7578290   | C   | T |
| ESCC-F57 | splicing | <i>NFI</i>                                                                                                                                                                  |                      |                                       | 724879:753620:906873:908135:90 | chr17 | 29541604  | 29541607  | GTA | A |
| ESCC-F57 | exonic   | <i>NRXN1</i>                                                                                                                                                                | nonsynonymous SNV    | NM_004801:c.C2566T:p.R856W            |                                | chr2  | 50724784  | 50724784  | G   | A |
| ESCC-F57 | exonic   | <i>SEMA4C</i>                                                                                                                                                               | nonsynonymous SNV    | NM_017789:c.C1087T:p.P363S            |                                | chr2  | 97529995  | 97529995  | G   | A |
| ESCC-F57 | exonic   | <i>FSIP2</i>                                                                                                                                                                | nonsynonymous SNV    | NM_173651:c.G15054T:p.L5018F          |                                | chr2  | 186668820 | 186668820 | G   | T |
| ESCC-F57 | exonic   | <i>UNC80</i>                                                                                                                                                                | nonsynonymous SNV    | NM_032504:c.C1463T:p.T488M            |                                | chr2  | 210681760 | 210681760 | C   | T |
| ESCC-F57 | exonic   | <i>PDZRN3</i>                                                                                                                                                               | nonsynonymous SNV    | NM_015009:c.C3149T:p.S1050F           |                                | chr3  | 73432568  | 73432568  | G   | A |
| ESCC-F57 | exonic   | <i>CMYA5</i>                                                                                                                                                                | nonsynonymous SNV    | NM_153610:c.C9382A:p.P3128T           |                                | chr5  | 79033970  | 79033970  | C   | A |
| ESCC-F57 | exonic   | <i>FBN2</i>                                                                                                                                                                 | nonsynonymous SNV    | NM_001999:c.G8530A:p.V2844I           |                                | chr5  | 127595356 | 127595356 | C   | T |
| ESCC-F57 | splicing | <i>FBN2(NM_001999:exon23:c.2813-1G&gt;-A)</i>                                                                                                                               |                      |                                       |                                | chr5  | 127685698 | 127685698 | C   | T |

|          |        |                  |                      |                                       |                                |       |           |           |    |   |
|----------|--------|------------------|----------------------|---------------------------------------|--------------------------------|-------|-----------|-----------|----|---|
| ESCC-F57 | exonic | <i>FBN2</i>      | nonsynonymous SNV    | NM_001999:c.G2738T;p.G913V            |                                | chr5  | 127686634 | 127686634 | C  | A |
| ESCC-F57 | exonic | <i>PTCHD4</i>    | nonsynonymous SNV    | NM_001013732:c.G2474A;p.R825Q         |                                | chr6  | 47846106  | 47846106  | C  | T |
| ESCC-F57 | exonic | <i>SYNE1</i>     | nonsynonymous SNV    | NM_033071:c.G8082T;p.K2694N           |                                | chr6  | 152711531 | 152711531 | C  | A |
| ESCC-F57 | exonic | <i>ABCB1</i>     | nonsynonymous SNV    | NM_000927:c.C3697T;p.R1233C           |                                | chr7  | 87133705  | 87133705  | G  | A |
| ESCC-F57 | exonic | <i>ZFX4</i>      | nonsynonymous SNV    | NM_024721:c.G9060T;p.L3020F           |                                | chr8  | 77768217  | 77768217  | G  | T |
| ESCC-F57 | exonic | <i>KIF4A</i>     | nonsynonymous SNV    | NM_012310:c.G2138A;p.R713H            |                                | chrX  | 69607053  | 69607053  | G  | A |
| ESCC-F58 | exonic | <i>OBSCN</i>     | nonsynonymous SNV    | NM_001098623:c.G12838A;p.E4280K       |                                | chr1  | 228496898 | 228496898 | G  | A |
| ESCC-F58 | exonic | <i>KIF5B</i>     | nonsynonymous SNV    | NM_004521:c.G2464A;p.E816K            |                                | chr10 | 32307078  | 32307078  | C  | T |
| ESCC-F58 | exonic | <i>APLNR</i>     | nonsynonymous SNV    | NM_005161:c.G850A;p.D284N             |                                | chr11 | 57003629  | 57003629  | C  | T |
| ESCC-F58 | exonic | <i>SRCAP</i>     | nonsynonymous SNV    | NM_006662:c.A2336G;p.Q779R            |                                | chr16 | 30724875  | 30724875  | A  | G |
| ESCC-F58 | exonic | <i>ZNF676</i>    | nonsynonymous SNV    | NM_001001411:c.C1317A;p.H439Q         |                                | chr19 | 22363202  | 22363202  | G  | T |
| ESCC-F58 | exonic | <i>PNMAL1</i>    | nonsynonymous SNV    | NM_001103149:c.C511T;p.R171W          |                                | chr19 | 46973782  | 46973782  | G  | A |
| ESCC-F58 | exonic | <i>NRXN1</i>     | nonsynonymous SNV    | NM_138735:c.G248C;p.R83P              |                                | chr2  | 50573840  | 50573840  | C  | G |
| ESCC-F58 | exonic | <i>TEKT4</i>     | nonsynonymous SNV    | NM_144705:c.G1240A;p.D414N            |                                | chr2  | 95542446  | 95542446  | G  | A |
| ESCC-F58 | exonic | <i>TIN</i>       | nonsynonymous SNV    | NM_003319:c.G32275C;p.D10759H         |                                | chr2  | 179457262 | 179457262 | C  | G |
| ESCC-F58 | exonic | <i>SI</i>        | nonsynonymous SNV    | NM_001041:c.A1726G;p.K576E            |                                | chr3  | 164764790 | 164764790 | T  | C |
| ESCC-F58 | exonic | <i>ZBBX</i>      | nonsynonymous SNV    | NM_001199202:c.G2253C;p.E751D         |                                | chr3  | 166958644 | 166958644 | C  | G |
| ESCC-F58 | exonic | <i>ATP11B</i>    | nonsynonymous SNV    | NM_014616:c.G1606C;p.E536Q            |                                | chr3  | 182584218 | 182584218 | G  | C |
| ESCC-F58 | exonic | <i>KIAA109</i>   | stopgain SNV         | NM_015312:c.G5776T;p.E1926X           |                                | chr4  | 123171582 | 123171582 | G  | T |
| ESCC-F58 | exonic | <i>PCDH10</i>    | stopgain SNV         | NM_020815:c.C1624T;p.Q542X            |                                | chr4  | 134072919 | 134072919 | C  | T |
| ESCC-F58 | exonic | <i>GRIA2</i>     | nonsynonymous SNV    | NM_000826:c.G2087A;p.R696Q            |                                | chr4  | 158281091 | 158281091 | G  | A |
| ESCC-F58 | exonic | <i>FAT1</i>      | nonsynonymous SNV    | NM_005245:c.A7976G;p.E2659G           |                                | chr4  | 187539764 | 187539764 | T  | C |
| ESCC-F58 | exonic | <i>MAST4</i>     | nonsynonymous SNV    | NM_015183:c.G1852A;p.E618K            |                                | chr5  | 66432417  | 66432417  | G  | A |
| ESCC-F58 | exonic | <i>PHF3</i>      | nonsynonymous SNV    | NM_015153:c.C5453T;p.P1818L           |                                | chr6  | 64422937  | 64422937  | C  | T |
| ESCC-F58 | exonic | <i>BA13</i>      | nonsynonymous SNV    | NM_001704:c.G994C;p.E332Q             |                                | chr6  | 69646536  | 69646536  | G  | C |
| ESCC-F58 | exonic | <i>SYNE1</i>     | nonsynonymous SNV    | NM_033071:c.G22963C;p.D7655H          |                                | chr6  | 152510512 | 152510512 | C  | G |
| ESCC-F58 | exonic | <i>RAPGEF5</i>   | nonsynonymous SNV    | NM_012294:c.C898G;p.L300V             |                                | chr7  | 22202086  | 22202086  | C  | C |
| ESCC-F58 | exonic | <i>NFE2L3</i>    | nonsynonymous SNV    | NM_004289:c.C1274T;p.S425L            |                                | chr7  | 26224592  | 26224592  | C  | T |
| ESCC-F58 | exonic | <i>TAX1BP1</i>   | nonsynonymous SNV    | NM_001079864:c.G290A;p.G97E           |                                | chr7  | 27805477  | 27805477  | G  | A |
| ESCC-F58 | exonic | <i>PCL0</i>      | frameshift insertion | NM_014510:c.3699_3700insA;p.K1233fs   |                                | chr7  | 82595405  | 82595405  | T  | A |
| ESCC-F58 | exonic | <i>CSMD3</i>     | nonsynonymous SNV    | NM_052900:c.G10186A;p.A3396T          |                                | chr8  | 113246641 | 113246641 | C  | T |
| ESCC-F58 | exonic | <i>CSMD3</i>     | nonsynonymous SNV    | NM_052900:c.G4681A;p.E1561K           |                                | chr8  | 113516109 | 113516109 | C  | T |
| ESCC-F58 | exonic | <i>EIF3H</i>     | nonsynonymous SNV    | NM_003756:c.C832G;p.Q278E             |                                | chr8  | 117658839 | 117658839 | G  | C |
| ESCC-F58 | exonic | <i>FAM135B</i>   | nonsynonymous SNV    | NM_015912:c.G300A;p.M100I             |                                | chr8  | 139269000 | 139269000 | C  | T |
| ESCC-F58 | exonic | <i>PLEC</i>      | frameshift deletion  | NM_201378:c.G244delG;p.L308fs         |                                | chr8  | 145008878 | 145008878 | C  | - |
| ESCC-F58 | exonic | <i>FAM75D1</i>   | nonsynonymous SNV    | NM_001001670:c.C129G;p.F43L           |                                | chr9  | 84603862  | 84603862  | C  | G |
| ESCC-F58 | exonic | <i>DMD</i>       | nonsynonymous SNV    | NM_004011:c.G3202C;p.E1068Q           |                                | chrX  | 31838176  | 31838176  | C  | G |
| ESCC-F58 | exonic | <i>PCDH1X</i>    | nonsynonymous SNV    | NM_001168362:c.C3178T;p.R1060C        |                                | chrX  | 91642878  | 91642878  | C  | T |
| ESCC-F59 | exonic | <i>SPEN</i>      | nonsynonymous SNV    | NM_015001:c.G6128A;p.R2043H           |                                | chr1  | 16258863  | 16258863  | G  | A |
| ESCC-F59 | exonic | <i>CUBN</i>      | nonsynonymous SNV    | NM_001081:c.C8277G;p.I2759M           |                                | chr10 | 16942757  | 16942757  | G  | C |
| ESCC-F59 | exonic | <i>MUC6</i>      | nonsynonymous SNV    | NM_005961:c.C4232T;p.T1411M           |                                | chr11 | 1018569   | 1018569   | G  | A |
| ESCC-F59 | exonic | <i>MUC2</i>      | nonsynonymous SNV    | NM_002457:c.T5051G;p.V1684G           |                                | chr11 | 1093232   | 1093232   | T  | G |
| ESCC-F59 | exonic | <i>FAT3</i>      | stopgain SNV         | NM_001008781:c.C7651T;p.Q2551X        |                                | chr11 | 92533830  | 92533830  | C  | T |
| ESCC-F59 | exonic | <i>ANAPC5</i>    | nonsynonymous SNV    | NM_016237:c.A157G;p.S53G              |                                | chr12 | 121789987 | 121789987 | T  | C |
| ESCC-F59 | exonic | <i>SPTB</i>      | nonsynonymous SNV    | NM_000347:c.G2397A;p.M799I            |                                | chr14 | 65259984  | 65259984  | C  | T |
| ESCC-F59 | exonic | <i>MYO9A</i>     | nonsynonymous SNV    | NM_006901:c.T1337C;p.I446T            |                                | chr15 | 72300210  | 72300210  | A  | G |
| ESCC-F59 | exonic | <i>TP53</i>      | stopgain SNV         | NM_001126118:c.C193T;p.Q65X           | 905938:905961:907041:907276:90 | chr17 | 7579377   | 7579377   | G  | A |
| ESCC-F59 | exonic | <i>NFE2L2</i>    | nonsynonymous SNV    | NM_001145412:c.C40T;p.L14F            | 1571843;1580991;1581066        | chr2  | 178098957 | 178098957 | G  | A |
| ESCC-F59 | exonic | <i>KRTAP15-1</i> | nonsynonymous SNV    | NM_181623:c.G407C;p.C136S             |                                | chr21 | 31813052  | 31813052  | G  | C |
| ESCC-F59 | exonic | <i>ARPP21</i>    | nonsynonymous SNV    | NM_016300:c.A475T;p.N159Y             |                                | chr3  | 35730867  | 35730867  | A  | T |
| ESCC-F59 | exonic | <i>SCN5A</i>     | nonsynonymous SNV    | NM_001099405:c.T4511A;p.F1504Y        |                                | chr3  | 38596018  | 38596018  | A  | T |
| ESCC-F59 | exonic | <i>MYH15</i>     | nonsynonymous SNV    | NM_014981:c.G2789C;p.R930T            |                                | chr3  | 108160034 | 108160034 | C  | G |
| ESCC-F59 | exonic | <i>SI</i>        | nonsynonymous SNV    | NM_001041:c.G952A;p.G318S             |                                | chr3  | 164780227 | 164780227 | C  | T |
| ESCC-F59 | exonic | <i>CDH10</i>     | nonsynonymous SNV    | NM_006727:c.G1271C;p.R424P            |                                | chr5  | 24505343  | 24505343  | C  | G |
| ESCC-F59 | exonic | <i>LSMBL3</i>    | nonsynonymous SNV    | NM_001007102:c.G2195A;p.G732D         | 1474880                        | chr6  | 130460825 | 130460825 | G  | A |
| ESCC-F59 | exonic | <i>TSC1</i>      | nonsynonymous SNV    | NM_001162427:c.G2204A;p.R735Q         | 906827                         | chr9  | 135778026 | 135778026 | C  | T |
| ESCC-F60 | exonic | <i>VPS13D</i>    | nonsynonymous SNV    | NM_018156:c.G11315A;p.R3772Q          |                                | chr1  | 12445338  | 12445338  | G  | A |
| ESCC-F60 | exonic | <i>PRRC2C</i>    | nonsynonymous SNV    | NM_015172:c.A1175T;p.K392I            |                                | chr1  | 171494085 | 171494085 | A  | T |
| ESCC-F60 | exonic | <i>OR4D9</i>     | nonsynonymous SNV    | NM_001004711:c.C800T;p.T267I          |                                | chr11 | 59283185  | 59283185  | C  | T |
| ESCC-F60 | exonic | <i>FAR2</i>      | nonsynonymous SNV    | NM_018099:c.G496A;p.V166I             |                                | chr12 | 29450084  | 29450084  | G  | A |
| ESCC-F60 | exonic | <i>TMEM119</i>   | nonsynonymous SNV    | NM_181724:c.A1G;p.M1V                 |                                | chr12 | 108986159 | 108986159 | T  | C |
| ESCC-F60 | exonic | <i>TP53</i>      | nonsynonymous SNV    | NM_001126115:c.A247T;p.S83C           | 905938:906836:907276:908134:90 | chr17 | 7578206   | 7578206   | T  | A |
| ESCC-F60 | exonic | <i>TP53</i>      | frameshift deletion  | NM_001126115:c.247_248del;p.R83_83del | 905938:907276:908134:909707:94 | chr17 | 7578205   | 7578205   | CT | - |
| ESCC-F60 | exonic | <i>OR7A17</i>    | nonsynonymous SNV    | NM_030901:c.G597T;p.M199I             |                                | chr19 | 14991571  | 14991571  | C  | A |
| ESCC-F60 | exonic | <i>ZNF99</i>     | nonsynonymous SNV    | NM_001080409:c.A47G;p.E16G            |                                | chr19 | 22952083  | 22952083  | T  | C |
| ESCC-F60 | exonic | <i>GCF2C</i>     | nonsynonymous SNV    | NM_001201335:c.G371C;p.G124A          |                                | chr2  | 75933672  | 75933672  | C  | G |
| ESCC-F60 | exonic | <i>GITF</i>      | nonsynonymous SNV    | NM_000248:c.G1195A;p.G399R            |                                | chr3  | 70014334  | 70014334  | G  | A |
| ESCC-F60 | exonic | <i>MAP3K13</i>   | nonsynonymous SNV    | NM_001242317:c.G1151A;p.R384H         |                                | chr3  | 185190891 | 185190891 | G  | A |
| ESCC-F60 | exonic | <i>MUC4</i>      | nonsynonymous SNV    | NM_018406:c.G10093A;p.G3365S          |                                | chr3  | 195508358 | 195508358 | C  | T |
| ESCC-F60 | exonic | <i>MUC4</i>      | nonsynonymous SNV    | NM_018406:c.G10087C;p.V3363L          |                                | chr3  | 195508364 | 195508364 | C  | G |
| ESCC-F60 | exonic | <i>MUC4</i>      | nonsynonymous SNV    | NM_018406:c.C8734A;p.P2912T           |                                | chr3  | 195509717 | 195509717 | G  | T |

|          |                 |                                                                                                                                                 |                      |                                   |                                |       |           |           |   |   |
|----------|-----------------|-------------------------------------------------------------------------------------------------------------------------------------------------|----------------------|-----------------------------------|--------------------------------|-------|-----------|-----------|---|---|
| ESCC-F60 | exonic          | <i>PCDH10</i>                                                                                                                                   | nonsynonymous SNV    | NM_020815:c.G2650T:p.D884Y        |                                | chr4  | 134073945 | 134073945 | G | T |
| ESCC-F60 | exonic          | <i>TRIO</i>                                                                                                                                     | nonsynonymous SNV    | NM_007118:c.G5806T:p.D1936Y       |                                | chr5  | 14471469  | 14471469  | G | T |
| ESCC-F60 | exonic          | <i>GPR98</i>                                                                                                                                    | nonsynonymous SNV    | NM_032119:c.C14756T:p.S4919L      |                                | chr5  | 90101195  | 90101195  | C | T |
| ESCC-F60 | exonic          | <i>HIST1H2AG</i>                                                                                                                                | nonsynonymous SNV    | NM_021064:c.C362G:p.T121S         |                                | chr6  | 27101212  | 27101212  | C | G |
| ESCC-F60 | exonic          | <i>KIAI1549</i>                                                                                                                                 | nonsynonymous SNV    | NM_001164665:c.T412C:p.F138L      |                                | chr7  | 138603960 | 138603960 | A | G |
| ESCC-F60 | exonic          | <i>TG</i>                                                                                                                                       | nonsynonymous SNV    | NM_003235:c.G2056A:p.A686T        |                                | chr8  | 133899673 | 133899673 | G | A |
| ESCC-F60 | exonic          | <i>ZFAT</i>                                                                                                                                     | nonsynonymous SNV    | NM_001174157:c.G2099A:p.R700H     |                                | chr8  | 135612869 | 135612869 | C | T |
| ESCC-F60 | exonic          | <i>KDM6A</i>                                                                                                                                    | frameshift deletion  | NM_021140:c.T125delC:p.Q709fs     | 724870;749715;946354           | chrX  | 44929025  | 44929025  | C | - |
| ESCC-F61 | exonic          | <i>TTN</i>                                                                                                                                      | nonsynonymous SNV    | NM_133378:c.A13781G:p.D4594G      |                                | chr2  | 179595879 | 179595879 | T | C |
| ESCC-F62 | exonic          | <i>COL11A1</i>                                                                                                                                  | nonsynonymous SNV    | NM_080630:c.T3185C:p.M1062T       |                                | chr1  | 103400072 | 103400072 | A | G |
| ESCC-F62 | exonic:splicing | <i>SYNE2;SYNE2</i>                                                                                                                              | nonsynonymous SNV    | NM_015180:c.A4888G:p.L1630V       |                                | chr14 | 64484313  | 64484313  | A | G |
| ESCC-F62 | exonic          | <i>TP53</i>                                                                                                                                     | nonsynonymous SNV    | NM_001126115:c.A107G:p.H36R       | 905938;907276;909707;946371;13 | chr17 | 7578427   | 7578427   | T | C |
| ESCC-F62 | exonic          | <i>SPHKAP</i>                                                                                                                                   | nonsynonymous SNV    | NM_001142644:c.C1955T:p.S652L     |                                | chr2  | 228883615 | 228883615 | G | A |
| ESCC-F62 | exonic          | <i>FLNC</i>                                                                                                                                     | nonsynonymous SNV    | NM_001127487:c.C1088T:p.P363L     |                                | chr7  | 128478361 | 128478361 | C | T |
| ESCC-F62 | exonic          | <i>FZD3</i>                                                                                                                                     | nonsynonymous SNV    | NM_145866:c.G1060A:p.G354S        |                                | chr8  | 28385337  | 28385337  | G | A |
| ESCC-F62 | exonic          | <i>ZFX4</i>                                                                                                                                     | nonsynonymous SNV    | NM_024721:c.C6266A:p.P2089H       |                                | chr8  | 77765423  | 77765423  | C | A |
| ESCC-F62 | exonic          | <i>SLC26A7</i>                                                                                                                                  | nonsynonymous SNV    | NM_052832:c.C1201A:p.L401I        |                                | chr8  | 92364098  | 92364098  | C | A |
| ESCC-F63 | exonic          | <i>USP24</i>                                                                                                                                    | nonsynonymous SNV    | NM_015306:c.A7262G:p.Y242I        |                                | chr1  | 55544263  | 55544263  | T | C |
| ESCC-F63 | exonic          | <i>MUC2</i>                                                                                                                                     | nonsynonymous SNV    | NM_002457:c.C511T:p.T1704I        |                                | chr11 | 1093292   | 1093292   | C | T |
| ESCC-F63 | exonic          | <i>SDHAF2</i>                                                                                                                                   | nonsynonymous SNV    | NM_017841:c.G461A:p.R154H         |                                | chr11 | 61213503  | 61213503  | G | A |
| ESCC-F63 | exonic          | <i>LRKK2</i>                                                                                                                                    | nonsynonymous SNV    | NM_198578:c.A1003C:p.N335H        |                                | chr12 | 40645078  | 40645078  | A | C |
| ESCC-F63 | exonic          | <i>NAV3</i>                                                                                                                                     | nonsynonymous SNV    | NM_014903:c.A311C:p.Q104P         |                                | chr12 | 78334166  | 78334166  | A | C |
| ESCC-F63 | exonic          | <i>ZNF676</i>                                                                                                                                   | nonsynonymous SNV    | NM_001001411:c.T1216C:p.S406P     |                                | chr19 | 22363303  | 22363303  | A | G |
| ESCC-F63 | exonic          | <i>TTN</i>                                                                                                                                      | nonsynonymous SNV    | NM_133378:c.G12100A:p.A4034T      |                                | chr2  | 179598188 | 179598188 | C | T |
| ESCC-F63 | exonic          | <i>MYO18B</i>                                                                                                                                   | stopgain SNV         | NM_032608:c.G4146A:p.W1382X       |                                | chr22 | 26272221  | 26272221  | G | A |
| ESCC-F63 | exonic          | <i>FILIP1L</i>                                                                                                                                  | nonsynonymous SNV    | NM_001042459:c.T419C:p.M140T      |                                | chr3  | 99648707  | 99648707  | A | G |
| ESCC-F63 | exonic          | <i>JGSF10</i>                                                                                                                                   | nonsynonymous SNV    | NM_178822:c.C3256G:p.P1086A       |                                | chr3  | 151164513 | 151164513 | G | C |
| ESCC-F63 | exonic          | <i>JGSF10</i>                                                                                                                                   | nonsynonymous SNV    | NM_178822:c.C490G:p.Q164E         |                                | chr3  | 151171397 | 151171397 | G | C |
| ESCC-F63 | exonic          | <i>CYP7B1</i>                                                                                                                                   | nonsynonymous SNV    | NM_004820:c.G640C:p.D214H         |                                | chr8  | 65528458  | 65528458  | C | G |
| ESCC-F64 | exonic          | <i>EIF2C1</i>                                                                                                                                   | nonsynonymous SNV    | NM_012199:c.A995G:p.Q332R         |                                | chr1  | 36360845  | 36360845  | A | G |
| ESCC-F64 | exonic          | <i>NELL1</i>                                                                                                                                    | nonsynonymous SNV    | NM_006157:c.T537G:p.D179E         |                                | chr11 | 20907020  | 20907020  | T | G |
| ESCC-F64 | exonic          | <i>TP53</i>                                                                                                                                     | nonsynonymous SNV    | NM_001126115:c.G445A:p.D149N      | 753566;905938;907276;909707;90 | chr17 | 7577097   | 7577097   | C | T |
| ESCC-F64 | exonic          | <i>LRP1B</i>                                                                                                                                    | nonsynonymous SNV    | NM_018557:c.C976T:p.H326Y         |                                | chr2  | 141946027 | 141946027 | G | A |
| ESCC-F64 | exonic          | <i>NFE2L2</i>                                                                                                                                   | nonsynonymous SNV    | NM_001145412:c.T183A:p.D61E       |                                | chr2  | 178098814 | 178098814 | A | T |
| ESCC-F64 | exonic          | <i>MUC4</i>                                                                                                                                     | nonsynonymous SNV    | NM_018406:c.T7630G:p.S2544P       |                                | chr3  | 195510821 | 195510821 | A | G |
| ESCC-F64 | exonic          | <i>CMYA5</i>                                                                                                                                    | nonsynonymous SNV    | NM_153610:c.G5200A:p.E1734K       |                                | chr5  | 79029788  | 79029788  | G | A |
| ESCC-F64 | splicing        | <i>SYNE1(NM_033071:exon139:c.24975+1G&gt;A;NM_182961:exon139:c.25119+1G&gt;A)</i>                                                               |                      |                                   |                                | chr6  | 152464757 | 152464757 | C | T |
| ESCC-F66 | exonic          | <i>HIST2H2BF</i>                                                                                                                                | unknown              | UNKNOWN                           |                                | chr1  | 149398986 | 149398986 | G | C |
| ESCC-F66 | exonic          | <i>CEP350</i>                                                                                                                                   | nonsynonymous SNV    | NM_014810:c.C5960G:p.S1987C       |                                | chr1  | 180047790 | 180047790 | C | G |
| ESCC-F66 | exonic          | <i>CRB1</i>                                                                                                                                     | nonsynonymous SNV    | NM_001193640:c.G2836A:p.E946K     |                                | chr1  | 197404165 | 197404165 | G | A |
| ESCC-F66 | exonic          | <i>MUC5B</i>                                                                                                                                    | nonsynonymous SNV    | NM_002458:c.G16831T:p.D5611Y      |                                | chr11 | 1281223   | 1281223   | G | T |
| ESCC-F66 | exonic          | <i>FCHSD2</i>                                                                                                                                   | nonsynonymous SNV    | NM_014824:c.C1039T:p.R347W        |                                | chr11 | 72600876  | 72600876  | G | A |
| ESCC-F66 | exonic          | <i>TECTA</i>                                                                                                                                    | nonsynonymous SNV    | NM_005422:c.T2398C:p.F800L        |                                | chr11 | 121000377 | 121000377 | T | C |
| ESCC-F66 | exonic          | <i>MGAT4C</i>                                                                                                                                   | nonsynonymous SNV    | NM_013244:c.G714C:p.K238N         |                                | chr12 | 86373790  | 86373790  | C | G |
| ESCC-F66 | exonic          | <i>PABPC3</i>                                                                                                                                   | stopgain SNV         | NM_030979:c.G772T:p.G258X         | 1604869                        | chr13 | 25671108  | 25671108  | G | T |
| ESCC-F66 | exonic          | <i>STRN3</i>                                                                                                                                    | nonsynonymous SNV    | NM_014574:c.A1000G:p.T334A        |                                | chr14 | 31382852  | 31382852  | T | C |
| ESCC-F66 | exonic          | <i>HYDIN</i>                                                                                                                                    | nonsynonymous SNV    | NM_032821:c.G5750A:p.R1917K       |                                | chr16 | 70998666  | 70998666  | C | T |
| ESCC-F66 | exonic          | <i>HYDIN</i>                                                                                                                                    | nonsynonymous SNV    | NM_032821:c.A3716G:p.E1239G       |                                | chr16 | 71026042  | 71026042  | T | C |
| ESCC-F66 | splicing        | <i>TP53(NM_001126117:exon8:c.658-2A&gt;C;NM_001126112:exon11:c.994-2A&gt;C;NM_001126116:exon8:c.731-2A&gt;C;NM_000546:exon11:c.994-2A&gt;C)</i> |                      |                                   | 905938;907276;909707;910566;94 | chr17 | 7574035   | 7574035   | T | G |
| ESCC-F66 | exonic          | <i>MSH6</i>                                                                                                                                     | nonsynonymous SNV    | NM_000179:c.T3016C:p.Y1006H       | 753548                         | chr2  | 48028138  | 48028138  | T | C |
| ESCC-F66 | exonic          | <i>GCFC2</i>                                                                                                                                    | nonsynonymous SNV    | NM_001201334:c.A1399C:p.T467P     |                                | chr2  | 75899126  | 75899126  | T | G |
| ESCC-F66 | exonic          | <i>TTN</i>                                                                                                                                      | stopgain SNV         | NM_133378:c.T22178A:p.L7393X      |                                | chr2  | 179580231 | 179580231 | A | T |
| ESCC-F66 | exonic          | <i>PIK3CA</i>                                                                                                                                   | nonsynonymous SNV    | NM_006218:c.A3140G:p.H1047R       | 687995;749709;753541;753562;75 | chr3  | 178952085 | 178952085 | A | G |
| ESCC-F66 | exonic          | <i>FAT1</i>                                                                                                                                     | nonsynonymous SNV    | NM_005245:c.A2384G:p.Y795C        |                                | chr4  | 187628598 | 187628598 | T | C |
| ESCC-F66 | exonic          | <i>DPCCR1</i>                                                                                                                                   | nonsynonymous SNV    | NM_080870:c.G1918C:p.G640R        |                                | chr6  | 30918159  | 30918159  | G | C |
| ESCC-F66 | exonic          | <i>RP1</i>                                                                                                                                      | nonsynonymous SNV    | NM_006269:c.T4676C:p.M1559T       |                                | chr8  | 55541118  | 55541118  | T | C |
| ESCC-F66 | exonic          | <i>VCPIP1</i>                                                                                                                                   | nonsynonymous SNV    | NM_025054:c.A2002G:p.L668V        |                                | chr8  | 67577192  | 67577192  | T | C |
| ESCC-F66 | exonic          | <i>CA2</i>                                                                                                                                      | nonsynonymous SNV    | NM_000067:c.C461T:p.P154L         |                                | chr8  | 86388043  | 86388043  | C | T |
| ESCC-F66 | exonic          | <i>NBN</i>                                                                                                                                      | frameshift deletion  | NM_002485:c.1651delA:p.R551fs     |                                | chr8  | 90965666  | 90965666  | T | - |
| ESCC-F66 | exonic          | <i>DMD</i>                                                                                                                                      | nonsynonymous SNV    | NM_004007:c.G309C:p.R103N         |                                | chrX  | 32717382  | 32717382  | C | G |
| ESCC-F67 | exonic          | <i>KIAA0754</i>                                                                                                                                 | nonsynonymous SNV    | NM_015038:c.G2312C:p.R771T        |                                | chr1  | 39878249  | 39878249  | G | C |
| ESCC-F67 | exonic          | <i>MYO3A</i>                                                                                                                                    | nonsynonymous SNV    | NM_017433:c.A2772C:p.Q924H        |                                | chr10 | 26443731  | 26443731  | A | C |
| ESCC-F67 | exonic          | <i>C10orf71</i>                                                                                                                                 | nonsynonymous SNV    | NM_001135196:c.T2661G:p.S887R     |                                | chr10 | 50533251  | 50533251  | T | G |
| ESCC-F67 | exonic          | <i>LRP1</i>                                                                                                                                     | nonsynonymous SNV    | NM_002332:c.G8668A:p.E2890K       |                                | chr12 | 57589753  | 57589753  | G | A |
| ESCC-F67 | exonic          | <i>HYDIN</i>                                                                                                                                    | nonsynonymous SNV    | NM_032821:c.G12301T:p.A4101S      |                                | chr16 | 70889170  | 70889170  | C | A |
| ESCC-F67 | exonic          | <i>TP53</i>                                                                                                                                     | nonsynonymous SNV    | NM_001126115:c.T1717G:p.Y73D      | 905938;907276;909707;946371;13 | chr17 | 7578236   | 7578236   | A | C |
| ESCC-F67 | exonic          | <i>NACA2</i>                                                                                                                                    | nonsynonymous SNV    | NM_199290:c.C446T:p.A149V         |                                | chr17 | 59668096  | 59668096  | G | A |
| ESCC-F67 | exonic          | <i>DNAH7</i>                                                                                                                                    | nonsynonymous SNV    | NM_018897:c.C5735A:p.T1912K       |                                | chr2  | 196749337 | 196749337 | G | T |
| ESCC-F67 | exonic          | <i>MYO18B</i>                                                                                                                                   | nonsynonymous SNV    | NM_032608:c.G7327A:p.D2443N       |                                | chr22 | 26423267  | 26423267  | G | A |
| ESCC-F67 | exonic          | <i>ARPP21</i>                                                                                                                                   | frameshift insertion | NM_016300:c.1976_1977msG:p.P659fs |                                | chr3  | 35785401  | 35785401  | - | G |
| ESCC-F67 | exonic          | <i>PIK3CA</i>                                                                                                                                   | nonsynonymous SNV    | NM_006218:c.G1633A:p.E545K        | 687459;687514;735784;762667;76 | chr3  | 178936091 | 178936091 | G | A |

|          |                 |                                                                                                                                               |                        |                                         |                                |       |           |           |     |   |
|----------|-----------------|-----------------------------------------------------------------------------------------------------------------------------------------------|------------------------|-----------------------------------------|--------------------------------|-------|-----------|-----------|-----|---|
| ESCC-F67 | exonic          | <i>GPR98</i>                                                                                                                                  | stopgain SNV           | NM_032119:c.T10154G:p.L3385X            |                                | chr5  | 90021466  | 90021466  | T   | G |
| ESCC-F67 | exonic          | <i>PLXNA4</i>                                                                                                                                 | nonsynonymous SNV      | NM_020911:c.G2197T:p.G733W              |                                | chr7  | 131895803 | 131895803 | C   | A |
| ESCC-F68 | exonic          | <i>CREBBP</i>                                                                                                                                 | frameshift insertion   | NM_001079846:c.1074_1075insAG:p.L358fs  |                                | chr16 | 3843529   | 3843529   | CT  |   |
| ESCC-F68 | exonic          | <i>MYH4</i>                                                                                                                                   | nonsynonymous SNV      | NM_017533:c.A1999T:p.R667W              |                                | chr17 | 10359188  | 10359188  | T   | A |
| ESCC-F68 | exonic          | <i>DNAH6</i>                                                                                                                                  | nonsynonymous SNV      | NM_001370:c.G9406A:p.E3136D             |                                | chr2  | 84940246  | 84940246  | G   | A |
| ESCC-F68 | exonic          | <i>SLC4A10</i>                                                                                                                                | nonsynonymous SNV      | NM_001178015:c.A918C:p.E306K            |                                | chr2  | 162730485 | 162730485 | A   | C |
| ESCC-F68 | exonic          | <i>EP300</i>                                                                                                                                  | nonsynonymous SNV      | NM_001429:c.G4195T:p.D1399Y             | 1523832;1560558                | chr22 | 41565529  | 41565529  | G   | T |
| ESCC-F68 | exonic          | <i>GRIA2</i>                                                                                                                                  | nonsynonymous SNV      | NM_000826:c.T580C:p.S194P               |                                | chr4  | 158233941 | 158233941 | T   | C |
| ESCC-F68 | exonic:splicing | <i>ADAMTS12:ADAMTS1</i>                                                                                                                       | nonsynonymous SNV      | NM_030955:c.G1717A:p.E573K              |                                | chr5  | 33641916  | 33641916  | C   | T |
| ESCC-F68 | exonic          | <i>FAT2</i>                                                                                                                                   | nonsynonymous SNV      | NM_001447:c.G4132A:p.G1378R             |                                | chr5  | 150932762 | 150932762 | C   | T |
| ESCC-F68 | exonic          | <i>SLC5A1</i>                                                                                                                                 | nonsynonymous SNV      | NM_001146008:c.C809T:p.A270V            |                                | chr8  | 70744100  | 70744100  | G   | A |
| ESCC-F68 | exonic          | <i>FAM47B</i>                                                                                                                                 | nonsynonymous SNV      | NM_152631:c.C340T:p.R114W               |                                | chrX  | 34961288  | 34961288  | C   | T |
| ESCC-F68 | exonic          | <i>RAB40AL</i>                                                                                                                                | nonsynonymous SNV      | NM_001031834:c.G601A:p.V201M            |                                | chrX  | 102192847 | 102192847 | G   | A |
| ESCC-F69 | exonic          | <i>SEC22B</i>                                                                                                                                 | unknown                | UNKNOWN                                 |                                | chr1  | 145109618 | 145109618 | G   | C |
| ESCC-F69 | exonic          | <i>LRRTM3</i>                                                                                                                                 | nonsynonymous SNV      | NM_178011:c.A695G:p.Q232R               |                                | chr10 | 68687369  | 68687369  | A   | G |
| ESCC-F69 | exonic          | <i>PRKD1</i>                                                                                                                                  | nonsynonymous SNV      | NM_002742:c.T148G:p.S50A                |                                | chr14 | 30396571  | 30396571  | A   | C |
| ESCC-F69 | splicing        | <i>TP53(NM_001126117:exon5:c.387-1G&gt;T;NM_001126112:exon9:c.783-1G&gt;T;NM_001126116:exon5:c.387-1G&gt;T;NM_000546:exon9:c.783-1G&gt;T)</i> |                        |                                         | 688006;753566;905938;907276;90 | chr17 | 7577156   | 7577156   | C   | A |
| ESCC-F69 | exonic          | <i>TP53</i>                                                                                                                                   | nonsynonymous SNV      | NM_001126118:c.T221G:p.F74C             | 724838;905938;906803;907276;90 | chr17 | 7579349   | 7579349   | C   | A |
| ESCC-F69 | exonic          | <i>RNF213</i>                                                                                                                                 | stopgain SNV           | NM_001256071:c.C10843T:p.Q3615X         |                                | chr17 | 78328357  | 78328357  | C   | T |
| ESCC-F69 | exonic          | <i>CBLC</i>                                                                                                                                   | nonsynonymous SNV      | NM_001130852:c.G393T:p.M131I            |                                | chr19 | 45284201  | 45284201  | G   | T |
| ESCC-F69 | exonic          | <i>ERBB4</i>                                                                                                                                  | nonsynonymous SNV      | NM_001042599:c.T3146G:p.V1049G          |                                | chr2  | 212251865 | 212251865 | A   | C |
| ESCC-F69 | exonic          | <i>TRIO</i>                                                                                                                                   | stoploss SNV           | NM_007118:c.G9293C:p.X3098S             |                                | chr5  | 14508530  | 14508530  | G   | C |
| ESCC-F69 | exonic          | <i>RANBP17</i>                                                                                                                                | nonsynonymous SNV      | NM_022897:c.G2984T:p.C995F              |                                | chr5  | 170720927 | 170720927 | G   | T |
| ESCC-F69 | exonic          | <i>TFA2A</i>                                                                                                                                  | nonframeshift deletion | NM_001032280:c.903_905del:p.301_302del  |                                | chr6  | 10400783  | 10400783  | CAC | - |
| ESCC-F69 | splicing        | <i>KDM6A(NM_021140:exon28:c.4176+1G&gt;A)</i>                                                                                                 |                        |                                         | 724870;749715;946354           | chrX  | 44969495  | 44969495  | G   | A |
| ESCC-F69 | exonic          | <i>PCDH11Y</i>                                                                                                                                | nonsynonymous SNV      | NM_032973:c.C3496A:p.H1166N             |                                | chrY  | 5605456   | 5605456   | C   | A |
| ESCC-F70 | exonic          | <i>TP53</i>                                                                                                                                   | nonsynonymous SNV      | NM_001126115:c.T262A:p.Y88N             | 688011;905938;907276;909707;94 | chr17 | 7578191   | 7578191   | A   | T |
| ESCC-F70 | exonic          | <i>XIRP2</i>                                                                                                                                  | stopgain SNV           | NM_001199144:c.C9283T:p.R3095X          |                                | chr2  | 168107851 | 168107851 | C   | T |
| ESCC-F70 | exonic          | <i>TTN</i>                                                                                                                                    | nonsynonymous SNV      | NM_003319:c.C4249T:p.S14166F            |                                | chr2  | 179441279 | 179441279 | G   | A |
| ESCC-F70 | exonic          | <i>TTN</i>                                                                                                                                    | nonsynonymous SNV      | NM_133378:c.C17234A:p.T5745N            |                                | chr2  | 179589136 | 179589136 | G   | T |
| ESCC-F70 | exonic          | <i>EPHA4</i>                                                                                                                                  | nonsynonymous SNV      | NM_004438:c.G1070T:p.R357L              |                                | chr2  | 222347320 | 222347320 | C   | A |
| ESCC-F70 | exonic          | <i>MUC6</i>                                                                                                                                   | nonsynonymous SNV      | NM_018406:c.G5065T:p.A1689S             |                                | chr3  | 195513386 | 195513386 | C   | A |
| ESCC-F70 | exonic          | <i>HERC6</i>                                                                                                                                  | nonsynonymous SNV      | NM_001165136:c.G2014A:p.E672K           |                                | chr4  | 89352329  | 89352329  | G   | A |
| ESCC-F70 | exonic          | <i>CSN1S1</i>                                                                                                                                 | frameshift deletion    | NM_001025104:c.18_19del:p.6_7del        |                                | chr4  | 70798291  | 70798292  | CA  | - |
| ESCC-F70 | exonic          | <i>HIST1H2BG</i>                                                                                                                              | nonsynonymous SNV      | NM_003518:c.G28T:p.A10S                 |                                | chr6  | 26216844  | 26216844  | C   | A |
| ESCC-F71 | exonic          | <i>SPEN</i>                                                                                                                                   | nonsynonymous SNV      | NM_015001:c.C4025G:p.S1342C             |                                | chr1  | 16256760  | 16256760  | C   | G |
| ESCC-F71 | exonic          | <i>SPEN</i>                                                                                                                                   | nonsynonymous SNV      | NM_015001:c.C4918T:p.P1640S             |                                | chr1  | 16257653  | 16257653  | C   | T |
| ESCC-F71 | exonic          | <i>SPEN</i>                                                                                                                                   | nonsynonymous SNV      | NM_015001:c.G5773A:p.E1925K             |                                | chr1  | 16258508  | 16258508  | G   | A |
| ESCC-F71 | exonic          | <i>SPEN</i>                                                                                                                                   | nonsynonymous SNV      | NM_015001:c.C6421G:p.P2141A             |                                | chr1  | 16259156  | 16259156  | C   | A |
| ESCC-F71 | exonic          | <i>SPEN</i>                                                                                                                                   | nonsynonymous SNV      | NM_015001:c.G6796A:p.D2266N             |                                | chr1  | 16259531  | 16259531  | G   | A |
| ESCC-F71 | exonic          | <i>SPEN</i>                                                                                                                                   | nonsynonymous SNV      | NM_015001:c.C6809G:p.S2270C             |                                | chr1  | 16259544  | 16259544  | C   | G |
| ESCC-F71 | exonic          | <i>SPEN</i>                                                                                                                                   | nonsynonymous SNV      | NM_015001:c.C7186G:p.Q2396E             |                                | chr1  | 16259921  | 16259921  | C   | G |
| ESCC-F71 | exonic          | <i>SMG5</i>                                                                                                                                   | nonsynonymous SNV      | NM_015327:c.G1288C:p.E430Q              |                                | chr1  | 156236139 | 156236139 | C   | G |
| ESCC-F71 | exonic          | <i>C10orf71</i>                                                                                                                               | nonsynonymous SNV      | NM_001135196:c.G1195C:p.E399Q           |                                | chr10 | 50531785  | 50531785  | C   | C |
| ESCC-F71 | exonic          | <i>C10orf71</i>                                                                                                                               | nonsynonymous SNV      | NM_001135196:c.G1220A:p.R407K           |                                | chr10 | 50531810  | 50531810  | G   | A |
| ESCC-F71 | exonic          | <i>MUC5B</i>                                                                                                                                  | nonsynonymous SNV      | NM_002458:c.C15007T:p.P5003S            |                                | chr11 | 1273716   | 1273716   | C   | T |
| ESCC-F71 | exonic          | <i>FAT3</i>                                                                                                                                   | nonsynonymous SNV      | NM_001008781:c.G4127C:p.R1376T          |                                | chr11 | 92498187  | 92498187  | G   | C |
| ESCC-F71 | exonic          | <i>LRK2</i>                                                                                                                                   | stopgain SNV           | NM_198578:c.G7555T:p.E2519X             |                                | chr12 | 40761538  | 40761538  | G   | T |
| ESCC-F71 | exonic          | <i>TRHDE</i>                                                                                                                                  | stopgain SNV           | NM_013381:c.C1897T:p.Q633X              |                                | chr12 | 72956810  | 72956810  | C   | T |
| ESCC-F71 | exonic          | <i>NAV3</i>                                                                                                                                   | nonsynonymous SNV      | NM_014903:c.G6656A:p.R2219Q             |                                | chr12 | 78594259  | 78594259  | G   | A |
| ESCC-F71 | exonic          | <i>PABPC3</i>                                                                                                                                 | nonsynonymous SNV      | NM_030979:c.C121G:p.R41G                |                                | chr13 | 25670457  | 25670457  | C   | G |
| ESCC-F71 | exonic          | <i>AHNAK2</i>                                                                                                                                 | nonsynonymous SNV      | NM_138420:c.G3217A:p.E1073K             |                                | chr14 | 105418571 | 105418571 | C   | T |
| ESCC-F71 | exonic          | <i>TP53</i>                                                                                                                                   | nonsynonymous SNV      | NM_001126115:c.G457A:p.E153K            | 724866;753566;905938;905964;90 | chr17 | 7577085   | 7577085   | C   | T |
| ESCC-F71 | exonic          | <i>FBXO11</i>                                                                                                                                 | nonsynonymous SNV      | NM_001190274:c.C1204A:p.H402N           | 753548                         | chr2  | 48059767  | 48059767  | G   | T |
| ESCC-F71 | exonic          | <i>DNAH6</i>                                                                                                                                  | nonsynonymous SNV      | NM_001370:c.C12239T:p.A4080V            |                                | chr2  | 85043073  | 85043073  | C   | T |
| ESCC-F71 | exonic          | <i>CYP27C1</i>                                                                                                                                | nonsynonymous SNV      | NM_001001665:c.G40T:p.D14Y              |                                | chr2  | 127961086 | 127961086 | C   | A |
| ESCC-F71 | exonic          | <i>FSIP2</i>                                                                                                                                  | nonsynonymous SNV      | NM_173651:c.C7594G:p.L2532V             |                                | chr2  | 186659190 | 186659190 | C   | G |
| ESCC-F71 | exonic          | <i>UNC80</i>                                                                                                                                  | nonframeshift deletion | NM_182587:c.9231_9233del:p.3077_3078del |                                | chr2  | 210858143 | 210858145 | GCC | - |
| ESCC-F71 | exonic          | <i>LTN1</i>                                                                                                                                   | nonsynonymous SNV      | NM_015565:c.G2365A:p.E789K              |                                | chr21 | 30332965  | 30332965  | C   | T |
| ESCC-F71 | splicing        | <i>EP300(NM_001429:exon23:c.3807-1G&gt;C)</i>                                                                                                 |                        |                                         |                                | chr22 | 41562602  | 41562602  | G   | C |
| ESCC-F71 | exonic          | <i>EP300</i>                                                                                                                                  | nonsynonymous SNV      | NM_001429:c.C6877A:p.H2293N             |                                | chr22 | 41574592  | 41574592  | C   | A |
| ESCC-F71 | exonic          | <i>TLL12</i>                                                                                                                                  | nonsynonymous SNV      | NM_015140:c.C907G:p.H303D               |                                | chr22 | 43572336  | 43572336  | G   | C |
| ESCC-F71 | exonic          | <i>SCN5A</i>                                                                                                                                  | nonsynonymous SNV      | NM_001099405:c.G4604C:p.S1535T          |                                | chr3  | 38595925  | 38595925  | C   | G |
| ESCC-F71 | exonic          | <i>PRDM9</i>                                                                                                                                  | nonsynonymous SNV      | NM_020227:c.G1661A:p.C554Y              |                                | chr5  | 23526858  | 23526858  | G   | A |
| ESCC-F71 | exonic          | <i>PCLO</i>                                                                                                                                   | nonsynonymous SNV      | NM_014510:c.G8662A:p.V2888I             |                                | chr7  | 82581607  | 82581607  | C   | T |
| ESCC-F71 | exonic          | <i>PCLO</i>                                                                                                                                   | stopgain SNV           | NM_014510:c.C7205G:p.S2402X             |                                | chr7  | 82583064  | 82583064  | C   | C |
| ESCC-F71 | exonic          | <i>PCLO</i>                                                                                                                                   | nonsynonymous SNV      | NM_014510:c.C98T:p.S33F                 |                                | chr7  | 82791811  | 82791811  | G   | A |
| ESCC-F71 | exonic          | <i>PIK3CG</i>                                                                                                                                 | nonsynonymous SNV      | NM_002649:c.G163A:p.E55K                |                                | chr7  | 106508169 | 106508169 | G   | A |
| ESCC-F71 | exonic          | <i>VPS13B</i>                                                                                                                                 | nonsynonymous SNV      | NM_017890:c.G5048A:p.R1683K             |                                | chr8  | 100587909 | 100587909 | G   | A |
| ESCC-F71 | exonic          | <i>RECQL4</i>                                                                                                                                 | nonsynonymous SNV      | NM_004260:c.G2953A:p.V985M              |                                | chr8  | 145737877 | 145737877 | C   | T |
| ESCC-F71 | exonic          | <i>PKN3</i>                                                                                                                                   | nonsynonymous SNV      | NM_013355:c.G2654C:p.R885P              |                                | chr9  | 131482869 | 131482869 | G   | C |

|          |          |                                                                                 |                         |                                             |                                |       |           |           |   |     |
|----------|----------|---------------------------------------------------------------------------------|-------------------------|---------------------------------------------|--------------------------------|-------|-----------|-----------|---|-----|
| ESCC-F72 | exonic   | <i>BCL9</i>                                                                     | nonsynonymous SNV       | NM_004326:c.G385T;p.D129Y                   |                                | chr1  | 147086240 | 147086240 | G | T   |
| ESCC-F72 | splicing | <i>HMCN1(NM_031935:exon19:c.2935+2T&gt;G)</i>                                   |                         |                                             |                                | chr1  | 185953447 | 185953447 | T | G   |
| ESCC-F72 | exonic   | <i>FAM5C</i>                                                                    | stopgain SNV            | NM_199051:c.G1924T;p.E642X                  |                                | chr1  | 190067525 | 190067525 | C | A   |
| ESCC-F72 | exonic   | <i>USH2A</i>                                                                    | nonsynonymous SNV       | NM_206933:c.T8489C;p.I2830T                 |                                | chr1  | 216052175 | 216052175 | A | G   |
| ESCC-F72 | exonic   | <i>SIPA1L2</i>                                                                  | nonsynonymous SNV       | NM_020808:c.G3488A;p.C1163Y                 |                                | chr1  | 232577564 | 232577564 | C | T   |
| ESCC-F72 | exonic   | <i>SIPA1L2</i>                                                                  | nonsynonymous SNV       | NM_020808:c.C3311T;p.R1111W                 |                                | chr1  | 232581297 | 232581297 | G | A   |
| ESCC-F72 | exonic   | <i>MYO3A</i>                                                                    | nonsynonymous SNV       | NM_017433:c.G1386C;p.K462N                  |                                | chr10 | 26377158  | 26377158  | G | C   |
| ESCC-F72 | exonic   | <i>MLL2</i>                                                                     | nonsynonymous SNV       | NM_003482:c.G10745A;p.R3582Q                |                                | chr12 | 49427743  | 49427743  | C | T   |
| ESCC-F72 | exonic   | <i>PALB2</i>                                                                    | nonsynonymous SNV       | NM_024675:c.T2482G;p.C828G                  |                                | chr16 | 23640993  | 23640993  | A | C   |
| ESCC-F72 | exonic   | <i>SKA2</i>                                                                     | nonsynonymous SNV       | NM_001100595:c.A71T;p.E24V                  |                                | chr17 | 57232374  | 57232374  | T | A   |
| ESCC-F72 | exonic   | <i>TP53</i>                                                                     | frameshift deletion     | NM_001126118:c.178delT;p.S60fs              | 905938;907276;909707;946371;13 | chr17 | 7579392   | 7579392   | A | -   |
| ESCC-F72 | exonic   | <i>SLC4A10</i>                                                                  | nonsynonymous SNV       | NM_001178015:c.G77C;p.R26T                  |                                | chr2  | 162627511 | 162627511 | G | C   |
| ESCC-F72 | exonic   | <i>TTN</i>                                                                      | nonsynonymous SNV       | NM_003319:c.G24511A;p.A8171T                |                                | chr2  | 179474444 | 179474444 | C | T   |
| ESCC-F72 | exonic   | <i>PCL0</i>                                                                     | nonsynonymous SNV       | NM_014510:c.G12242C;p.R4081P                |                                | chr7  | 82545060  | 82545060  | C | G   |
| ESCC-F72 | exonic   | <i>MUC17</i>                                                                    | nonsynonymous SNV       | NM_001040105:c.C5722A;p.P1908T              |                                | chr7  | 100680419 | 100680419 | C | A   |
| ESCC-F72 | exonic   | <i>SLC5A1</i>                                                                   | nonsynonymous SNV       | NM_001146009:c.G2292T;p.Q764H               |                                | chr8  | 70585194  | 70585194  | C | A   |
| ESCC-F72 | exonic   | <i>PLEC</i>                                                                     | nonsynonymous SNV       | NM_201378:c.G1158C;p.K386N                  |                                | chr8  | 145008229 | 145008229 | C | G   |
| ESCC-F72 | exonic   | <i>NOTCH1</i>                                                                   | nonsynonymous SNV       | NM_017617:c.G2842A;p.E948K                  | 1542900                        | chr9  | 139404312 | 139404312 | C | T   |
| ESCC-F73 | splicing | <i>ATRNL1(NM_207303:exon25:c.3716+2T&gt;G)</i>                                  |                         |                                             |                                | chr10 | 117278836 | 117278836 | T | G   |
| ESCC-F73 | exonic   | <i>WEE1</i>                                                                     | nonsynonymous SNV       | NM_001143976:c.G570T;p.K190N                |                                | chr11 | 9603149   | 9603149   | G | T   |
| ESCC-F73 | exonic   | <i>CNTN5</i>                                                                    | stopgain SNV            | NM_175566:c.C1234T;p.Q412X                  |                                | chr11 | 99944902  | 99944902  | C | T   |
| ESCC-F73 | exonic   | <i>C14orf43</i>                                                                 | nonsynonymous SNV       | NM_001043318:c.C1639A;p.L547I               |                                | chr14 | 74203811  | 74203811  | G | T   |
| ESCC-F73 | exonic   | <i>CHD2</i>                                                                     | nonsynonymous SNV       | NM_001271:c.C3214G;p.R1072G                 |                                | chr15 | 93527707  | 93527707  | C | G   |
| ESCC-F73 | exonic   | <i>CDK12</i>                                                                    | stopgain SNV            | NM_015083:c.C2703A;p.Y901X                  |                                | chr17 | 37667818  | 37667818  | C | A   |
| ESCC-F73 | exonic   | <i>ZNF347</i>                                                                   | nonsynonymous SNV       | NM_001172674:c.G1363A;p.E455K               |                                | chr19 | 53644721  | 53644721  | C | T   |
| ESCC-F73 | exonic   | <i>ZNF547</i>                                                                   | nonsynonymous SNV       | NM_173631:c.G706A;p.G236R                   |                                | chr19 | 57889050  | 57889050  | G | A   |
| ESCC-F73 | exonic   | <i>PDE11A</i>                                                                   | nonsynonymous SNV       | NM_001077358:c.C59G;p.A20G                  |                                | chr2  | 178769853 | 178769853 | G | C   |
| ESCC-F73 | exonic   | <i>TTN</i>                                                                      | nonsynonymous SNV       | NM_003319:c.G8440A;p.D2814N                 |                                | chr2  | 179634850 | 179634850 | C | T   |
| ESCC-F73 | exonic   | <i>PIK3CA</i>                                                                   | nonsynonymous SNV       | NM_006218:c.A3127G;p.M1043V                 | 904439;1018677;1046072;109741  | chr3  | 178952072 | 178952072 | A | G   |
| ESCC-F73 | exonic   | <i>MUC4</i>                                                                     | nonsynonymous SNV       | NM_018406:c.C7373G;p.S2458C                 |                                | chr3  | 195511078 | 195511078 | G | C   |
| ESCC-F73 | exonic   | <i>DROSHA</i>                                                                   | nonsynonymous SNV       | NM_001100412:c.C1906T;p.P636S               |                                | chr5  | 31483715  | 31483715  | G | A   |
| ESCC-F73 | exonic   | <i>COL12A1</i>                                                                  | nonsynonymous SNV       | NM_080645:c.T1021G;p.L341V                  |                                | chr6  | 75855865  | 75855865  | A | C   |
| ESCC-F73 | exonic   | <i>FND1</i>                                                                     | nonsynonymous SNV       | NM_032532:c.C1475T;p.S492F                  |                                | chr6  | 159653019 | 159653019 | C | T   |
| ESCC-F74 | exonic   | <i>GSTM5</i>                                                                    | nonsynonymous SNV       | NM_000851:c.G207T;p.K69N                    |                                | chr1  | 110256135 | 110256135 | G | T   |
| ESCC-F74 | exonic   | <i>HMCN1</i>                                                                    | nonsynonymous SNV       | NM_031935:c.G8083C;p.E2695Q                 |                                | chr1  | 186039833 | 186039833 | G | C   |
| ESCC-F74 | exonic   | <i>KIF14</i>                                                                    | nonsynonymous SNV       | NM_014875:c.G3751T;p.D1251Y                 |                                | chr1  | 200534708 | 200534708 | C | A   |
| ESCC-F74 | exonic   | <i>PCDH9</i>                                                                    | nonsynonymous SNV       | NM_020403:c.A3205G;p.T1069A                 |                                | chr13 | 67205375  | 67205375  | T | C   |
| ESCC-F74 | exonic   | <i>AKAP6</i>                                                                    | nonsynonymous SNV       | NM_004274:c.C5093G;p.S1698C                 |                                | chr14 | 33292112  | 33292112  | C | G   |
| ESCC-F74 | exonic   | <i>FBN1</i>                                                                     | stopgain SNV            | NM_000138:c.C3563A;p.S1188X                 |                                | chr15 | 48779298  | 48779298  | G | T   |
| ESCC-F74 | exonic   | <i>SNTB2</i>                                                                    | nonsynonymous SNV       | NM_006750:c.G1190T;p.G397V                  |                                | chr16 | 69317992  | 69317992  | G | T   |
| ESCC-F74 | exonic   | <i>NF1</i>                                                                      | nonsynonymous SNV       | NM_000267:c.G7471C;p.G2491R                 | 688087;724879;908135;908450;11 | chr17 | 29679351  | 29679351  | G | C   |
| ESCC-F74 | exonic   | <i>TP53</i>                                                                     | nonframeshift insertion | NM_001126115:c.358_359insATC;p.L120delinsIL | 905938;907276;907321;909707;94 | chr17 | 7577527   | 7577527   | T | GAT |
| ESCC-F74 | splicing | <i>PPP4R1(NM_005134:exon11:c.868-1G&gt;C;NM_001042388:exon11:c.919-1G&gt;C)</i> |                         |                                             |                                | chr18 | 9577190   | 9577190   | C | G   |
| ESCC-F74 | exonic   | <i>MYT1L</i>                                                                    | nonsynonymous SNV       | NM_015025:c.A476T;p.E159V                   |                                | chr2  | 1946783   | 1946783   | T | A   |
| ESCC-F74 | exonic   | <i>SCN7A</i>                                                                    | nonsynonymous SNV       | NM_002976:c.C4087T;p.P1363S                 |                                | chr2  | 167263052 | 167263052 | G | A   |
| ESCC-F74 | exonic   | <i>SCN7A</i>                                                                    | nonsynonymous SNV       | NM_002976:c.C3116G;p.S1039C                 |                                | chr2  | 167277719 | 167277719 | G | C   |
| ESCC-F74 | exonic   | <i>TTN</i>                                                                      | nonsynonymous SNV       | NM_003319:c.G39355A;p.G13119S               |                                | chr2  | 179446445 | 179446445 | C | T   |
| ESCC-F74 | exonic   | <i>FSIP2</i>                                                                    | nonsynonymous SNV       | NM_173651:c.A16249G;p.I5417V                |                                | chr2  | 186670015 | 186670015 | A | G   |
| ESCC-F74 | exonic   | <i>KIAA1009</i>                                                                 | nonsynonymous SNV       | NM_014895:c.A10061T;p.N336Y                 |                                | chr6  | 84904623  | 84904623  | T | A   |
| ESCC-F74 | exonic   | <i>C5MD3</i>                                                                    | nonsynonymous SNV       | NM_052900:c.T8726C;p.V2909A                 |                                | chr8  | 113299391 | 113299391 | A | G   |
| ESCC-F74 | exonic   | <i>PLEC</i>                                                                     | nonsynonymous SNV       | NM_201378:c.G13053C;p.K4351N                |                                | chr8  | 144990894 | 144990894 | C | G   |
| ESCC-F75 | splicing | <i>GBP4(NM_052941:exon5:c.364-1G&gt;C)</i>                                      |                         |                                             |                                | chr1  | 89659096  | 89659096  | C | G   |
| ESCC-F75 | exonic   | <i>HMCN1</i>                                                                    | nonsynonymous SNV       | NM_031935:c.A13580T;p.Q4527L                |                                | chr1  | 186106067 | 186106067 | A | T   |
| ESCC-F75 | exonic   | <i>LRN2</i>                                                                     | nonsynonymous SNV       | NM_201630:c.G1280A;p.R427Q                  |                                | chr1  | 204587841 | 204587841 | C | T   |
| ESCC-F75 | exonic   | <i>FMN2</i>                                                                     | nonsynonymous SNV       | NM_020066:c.A4192C;p.T1398P                 |                                | chr1  | 240458160 | 240458160 | A | C   |
| ESCC-F75 | exonic   | <i>FMN2</i>                                                                     | nonsynonymous SNV       | NM_020066:c.C4195A;p.L1399I                 |                                | chr1  | 240458163 | 240458163 | C | A   |
| ESCC-F75 | exonic   | <i>ATM</i>                                                                      | nonsynonymous SNV       | NM_000051:c.G6248C;p.G2083A                 |                                | chr11 | 108188149 | 108188149 | G | C   |
| ESCC-F75 | exonic   | <i>FAM55A</i>                                                                   | nonsynonymous SNV       | NM_152315:c.C928T;p.R310C                   |                                | chr11 | 114392980 | 114392980 | G | A   |
| ESCC-F75 | exonic   | <i>ARID2</i>                                                                    | nonsynonymous SNV       | NM_152641:c.G580C;p.E194Q                   |                                | chr12 | 46211614  | 46211614  | G | C   |
| ESCC-F75 | exonic   | <i>MLL2</i>                                                                     | nonsynonymous SNV       | NM_003482:c.C15142T;p.R5048C                |                                | chr12 | 49420607  | 49420607  | G | A   |
| ESCC-F75 | exonic   | <i>DCAF11</i>                                                                   | nonsynonymous SNV       | NM_001163484:c.G65A;p.R22Q                  |                                | chr14 | 24584868  | 24584868  | G | A   |
| ESCC-F75 | exonic   | <i>UNC79</i>                                                                    | nonsynonymous SNV       | NM_020818:c.C4448G;p.S1483C                 |                                | chr14 | 94088558  | 94088558  | C | G   |
| ESCC-F75 | exonic   | <i>DLLA</i>                                                                     | nonsynonymous SNV       | NM_019074:c.G1259T;p.R420L                  |                                | chr15 | 41228444  | 41228444  | G | T   |
| ESCC-F75 | exonic   | <i>DLLA</i>                                                                     | nonsynonymous SNV       | NM_019074:c.G1903A;p.D635N                  |                                | chr15 | 41229088  | 41229088  | G | A   |
| ESCC-F75 | exonic   | <i>DLLA</i>                                                                     | frameshift deletion     | NM_019074:c.1866delG;p.L622fs               |                                | chr15 | 41229051  | 41229051  | G | -   |
| ESCC-F75 | exonic   | <i>C16orf62</i>                                                                 | nonsynonymous SNV       | NM_020314:c.G1702A;p.E568K                  |                                | chr16 | 19640010  | 19640010  | G | A   |
| ESCC-F75 | exonic   | <i>HYDIN</i>                                                                    | nonsynonymous SNV       | NM_032821:c.C3454G;p.Q1152E                 | 1331067                        | chr16 | 71052222  | 71052222  | G | C   |
| ESCC-F75 | exonic   | <i>TP53</i>                                                                     | stopgain SNV            | NM_001126115:c.C520T;p.R174X                | 749714;749727;753566;905938;90 | chr17 | 7577022   | 7577022   | G | A   |
| ESCC-F75 | exonic   | <i>MYH8</i>                                                                     | nonsynonymous SNV       | NM_002472:c.A1121G;p.E374G                  |                                | chr17 | 10317245  | 10317245  | T | C   |
| ESCC-F75 | exonic   | <i>ZNF429</i>                                                                   | nonsynonymous SNV       | NM_001001415:c.A742G;p.K248E                |                                | chr19 | 21719597  | 21719597  | A | G   |
| ESCC-F75 | exonic   | <i>LILRA3</i>                                                                   | nonsynonymous SNV       | NM_001172654:c.A191C;p.K64T                 |                                | chr19 | 54803633  | 54803633  | T | G   |



|          |                 |                         |                      |                                       |                       |       |           |           |    |   |
|----------|-----------------|-------------------------|----------------------|---------------------------------------|-----------------------|-------|-----------|-----------|----|---|
| ESCC-F75 | exonic          | <i>ZNF304</i>           | nonsynonymous SNV    | NM_020657:c.C1452G:p.F484L            |                       | chr19 | 57868689  | 57868689  | C  | G |
| ESCC-F75 | exonic          | <i>ZNF547</i>           | nonsynonymous SNV    | NM_173631:c.C704G:p.S235C             |                       | chr19 | 57889048  | 57889048  | C  | T |
| ESCC-F75 | exonic          | <i>NRXN1</i>            | nonsynonymous SNV    | NM_004801:c.G3241A:p.E1081K           |                       | chr2  | 50699439  | 50699439  | C  | G |
| ESCC-F75 | exonic          | <i>LRP2</i>             | nonsynonymous SNV    | NM_004525:c.G6924T:p.E2308D           |                       | chr2  | 170063306 | 170063306 | C  | A |
| ESCC-F75 | exonic          | <i>LRP2</i>             | nonsynonymous SNV    | NM_004525:c.C5887A:p.P1963T           |                       | chr2  | 170070320 | 170070320 | G  | T |
| ESCC-F75 | exonic          | <i>TTN</i>              | nonsynonymous SNV    | NM_003319:c.G39994C:p.E13332Q         |                       | chr2  | 179444825 | 179444825 | C  | G |
| ESCC-F75 | exonic          | <i>ERBB4</i>            | nonsynonymous SNV    | NM_001042599:c.C716T:p.S239L          |                       | chr2  | 212589826 | 212589826 | G  | A |
| ESCC-F75 | exonic          | <i>LTN1</i>             | nonsynonymous SNV    | NM_015565:c.A1453C:p.L485L            |                       | chr21 | 30339498  | 30339498  | T  | G |
| ESCC-F75 | exonic          | <i>ATXN7</i>            | nonsynonymous SNV    | NM_001128149:c.C329T:p.S110F          |                       | chr3  | 63967873  | 63967873  | C  | T |
| ESCC-F75 | exonic:splicing | <i>MYH15:MYH15</i>      | nonsynonymous SNV    | NM_014981:c.G1293T:p.Q431H            |                       | chr3  | 108195244 | 108195244 | C  | A |
| ESCC-F75 | exonic          | <i>HEG1</i>             | nonsynonymous SNV    | NM_020733:c.C484G:p.L162V             |                       | chr3  | 124748165 | 124748165 | G  | C |
| ESCC-F75 | exonic          | <i>CCDC50</i>           | nonsynonymous SNV    | NM_178335:c.G868T:p.V290F             |                       | chr3  | 191093270 | 191093270 | G  | T |
| ESCC-F75 | exonic          | <i>ANK2</i>             | nonsynonymous SNV    | NM_001148:c.G1442C:p.R481P            |                       | chr4  | 114186108 | 114186108 | G  | C |
| ESCC-F75 | exonic          | <i>FBXW7</i>            | nonsynonymous SNV    | NM_001013415:c.C1031T:p.S344F         | 906763                | chr4  | 153249393 | 153249393 | G  | A |
| ESCC-F75 | exonic          | <i>CDH12</i>            | stopgain SNV         | NM_004061:c.C610T:p.Q204X             |                       | chr5  | 21854816  | 21854816  | G  | A |
| ESCC-F75 | exonic          | <i>PRDM9</i>            | nonsynonymous SNV    | NM_020227:c.C860G:p.A287G             |                       | chr5  | 23522972  | 23522972  | C  | G |
| ESCC-F75 | exonic          | <i>SPEF2</i>            | nonsynonymous SNV    | NM_024867:c.A1755G:p.L585M            |                       | chr5  | 35692682  | 35692682  | A  | G |
| ESCC-F75 | exonic          | <i>VCAN</i>             | nonsynonymous SNV    | NM_001126336:c.G337A:p.A113T          |                       | chr5  | 82786183  | 82786183  | G  | A |
| ESCC-F75 | exonic          | <i>KIF13A</i>           | nonsynonymous SNV    | NM_001105566:c.A1780T:p.S594C         |                       | chr6  | 17826005  | 17826005  | T  | A |
| ESCC-F75 | exonic          | <i>HIST1H2BI</i>        | nonsynonymous SNV    | NM_003525:c.G229A:p.E77K              |                       | chr6  | 26273432  | 26273432  | G  | A |
| ESCC-F75 | exonic          | <i>GRK2</i>             | nonsynonymous SNV    | NM_001166247:c.C1396G:p.L466V         |                       | chr6  | 102307240 | 102307240 | C  | G |
| ESCC-F75 | exonic          | <i>GRM3</i>             | nonsynonymous SNV    | NM_000840:c.C1942A:p.L648M            |                       | chr7  | 86468772  | 86468772  | C  | A |
| ESCC-F75 | exonic          | <i>ORC5</i>             | nonsynonymous SNV    | NM_002553:c.C778G:p.H260I             |                       | chr7  | 103824437 | 103824437 | G  | C |
| ESCC-F75 | exonic          | <i>FLNC</i>             | nonsynonymous SNV    | NM_001127487:c.G3080A:p.R1027H        |                       | chr7  | 128484208 | 128484208 | G  | C |
| ESCC-F75 | exonic          | <i>MAGEC3</i>           | nonsynonymous SNV    | NM_138702:c.G62T:p.W21L               |                       | chrX  | 140926163 | 140926163 | G  | T |
| ESCC-F76 | exonic          | <i>ADAMTSL4</i>         | nonsynonymous SNV    | NM_019032:c.C560T:p.S187F             |                       | chr1  | 150526027 | 150526027 | C  | T |
| ESCC-F76 | exonic          | <i>CRB1</i>             | nonsynonymous SNV    | NM_001193640:c.G415A:p.G139R          |                       | chr1  | 197297896 | 197297896 | G  | A |
| ESCC-F76 | exonic          | <i>USH2A</i>            | nonsynonymous SNV    | NM_206933:c.G1151C:p.L3717F           |                       | chr1  | 215933082 | 215933082 | C  | G |
| ESCC-F76 | exonic          | <i>CUBN</i>             | nonsynonymous SNV    | NM_001081:c.C10439T:p.S3480F          |                       | chr10 | 16873340  | 16873340  | G  | A |
| ESCC-F76 | exonic          | <i>MUC6</i>             | nonsynonymous SNV    | NM_005961:c.C6403G:p.P2135A           |                       | chr11 | 1016398   | 1016398   | G  | C |
| ESCC-F76 | exonic          | <i>MUC6</i>             | nonsynonymous SNV    | NM_005961:c.C5099G:p.S1700C           |                       | chr11 | 1017702   | 1017702   | G  | C |
| ESCC-F76 | exonic          | <i>ARID2</i>            | nonsynonymous SNV    | NM_152641:c.C3806T:p.P1269L           |                       | chr12 | 46245712  | 46245712  | C  | T |
| ESCC-F76 | exonic          | <i>PCDH9</i>            | nonsynonymous SNV    | NM_020403:c.G1556A:p.R519Q            |                       | chr13 | 67801017  | 67801017  | C  | T |
| ESCC-F76 | exonic          | <i>NALCN</i>            | nonsynonymous SNV    | NM_052867:c.G1528T:p.V510F            |                       | chr13 | 101881842 | 101881842 | C  | A |
| ESCC-F76 | exonic          | <i>BUB1B</i>            | nonsynonymous SNV    | NM_001211:c.C1990T:p.L664F            |                       | chr15 | 40498640  | 40498640  | C  | T |
| ESCC-F76 | exonic          | <i>C13orf34</i>         | nonsynonymous SNV    | NM_001105528:c.G1130C:p.R377T         |                       | chr18 | 30873169  | 30873169  | C  | G |
| ESCC-F76 | exonic          | <i>UHRF1</i>            | unknown              | UNKNOWN                               |                       | chr19 | 4941570   | 4941570   | C  | T |
| ESCC-F76 | exonic          | <i>MUC16</i>            | nonsynonymous SNV    | NM_024690:c.G21704A:p.R7235K          |                       | chr19 | 9065742   | 9065742   | C  | T |
| ESCC-F76 | exonic          | <i>ZNF208</i>           | nonsynonymous SNV    | NM_007153:c.G325C:p.E109Q             |                       | chr19 | 22157511  | 22157511  | C  | G |
| ESCC-F76 | exonic          | <i>GPR39</i>            | nonsynonymous SNV    | NM_001508:c.C1133T:p.A378V            |                       | chr2  | 133402950 | 133402950 | C  | T |
| ESCC-F76 | exonic          | <i>LRP2</i>             | nonsynonymous SNV    | NM_004525:c.G5677A:p.D1893N           |                       | chr2  | 170072912 | 170072912 | C  | T |
| ESCC-F76 | exonic          | <i>TTN</i>              | nonsynonymous SNV    | NM_003319:c.G33037C:p.V11013L         |                       | chr2  | 179456220 | 179456220 | C  | G |
| ESCC-F76 | exonic          | <i>TTN</i>              | nonsynonymous SNV    | NM_003319:c.G5284A:p.E1762K           |                       | chr2  | 179641169 | 179641169 | C  | T |
| ESCC-F76 | exonic          | <i>TTN</i>              | nonsynonymous SNV    | NM_003319:c.G4216C:p.E1406Q           |                       | chr2  | 179642557 | 179642557 | C  | G |
| ESCC-F76 | exonic          | <i>ANK2</i>             | nonsynonymous SNV    | NM_001148:c.C7801G:p.L2601V           |                       | chr4  | 114277575 | 114277575 | C  | G |
| ESCC-F76 | exonic          | <i>CDH10</i>            | stopgain SNV         | NM_006727:c.C572G:p.S191X             |                       | chr5  | 24535886  | 24535886  | C  | C |
| ESCC-F76 | exonic          | <i>MAST4</i>            | frameshift deletion  | NM_015183:c.2570_2571del:p.857_857del |                       | chr5  | 66445259  | 66445260  | GC | - |
| ESCC-F76 | exonic          | <i>DMXL1</i>            | nonsynonymous SNV    | NM_005509:c.G3884T:p.G1295V           |                       | chr5  | 118485406 | 118485406 | G  | T |
| ESCC-F76 | exonic          | <i>DMXL1</i>            | stopgain SNV         | NM_005509:c.G5272T:p.E1758X           |                       | chr5  | 118503433 | 118503433 | G  | T |
| ESCC-F76 | exonic          | <i>DGKB</i>             | nonsynonymous SNV    | NM_004080:c.G1601A:p.R534Q            |                       | chr7  | 14620498  | 14620498  | C  | T |
| ESCC-F76 | exonic          | <i>TMEM2</i>            | nonsynonymous SNV    | NM_001135820:c.C405G:p.I135M          |                       | chr9  | 74361184  | 74361184  | G  | C |
| ESCC-F77 | exonic          | <i>NRG3</i>             | nonsynonymous SNV    | NM_001165973:c.G933C:p.R311S          |                       | chr10 | 84744551  | 84744551  | G  | C |
| ESCC-F77 | exonic          | <i>CDH1</i>             | nonsynonymous SNV    | NM_004360:c.G1273A:p.V425I            | 910704:997932:1001724 | chr16 | 68847351  | 68847351  | G  | A |
| ESCC-F77 | exonic          | <i>MYH2</i>             | nonsynonymous SNV    | NM_001100112:c.C5695G:p.L1899V        |                       | chr17 | 10424728  | 10424728  | G  | C |
| ESCC-F77 | exonic          | <i>ORTA10</i>           | nonsynonymous SNV    | NM_001005190:c.C415G:p.Q139E          |                       | chr19 | 14952275  | 14952275  | G  | C |
| ESCC-F77 | exonic          | <i>ZNF676</i>           | nonsynonymous SNV    | NM_001001411:c.C1301T:p.S434L         |                       | chr19 | 22363218  | 22363218  | G  | A |
| ESCC-F77 | exonic          | <i>TMEM177</i>          | nonsynonymous SNV    | NM_001105198:c.G335A:p.G112E          |                       | chr2  | 120438764 | 120438764 | G  | A |
| ESCC-F77 | exonic          | <i>TTC21B</i>           | nonsynonymous SNV    | NM_024753:c.G1648C:p.E550Q            |                       | chr2  | 166775812 | 166775812 | C  | G |
| ESCC-F77 | exonic          | <i>FSIP2</i>            | nonsynonymous SNV    | NM_173651:c.G20340C:p.K6780N          |                       | chr2  | 186678517 | 186678517 | G  | C |
| ESCC-F77 | exonic          | <i>PDHA2</i>            | nonsynonymous SNV    | NM_005390:c.C232G:p.Q78E              |                       | chr4  | 96761533  | 96761533  | C  | G |
| ESCC-F77 | exonic          | <i>ANKHD1:ANKHD1-EL</i> | nonsynonymous SNV    | NM_001197030:c.G1594A:p.E532K         |                       | chr5  | 139838862 | 139838862 | G  | A |
| ESCC-F77 | exonic          | <i>FAT2</i>             | nonsynonymous SNV    | NM_001447:c.C10800G:p.F3600L          |                       | chr5  | 150901354 | 150901354 | G  | C |
| ESCC-F77 | exonic          | <i>FAT2</i>             | nonsynonymous SNV    | NM_001447:c.G3814C:p.D1272H           |                       | chr5  | 150934054 | 150934054 | C  | G |
| ESCC-F78 | exonic          | <i>VPS13D</i>           | nonsynonymous SNV    | NM_018156:c.T12818C:p.I4237T          |                       | chr1  | 12567005  | 12567005  | T  | C |
| ESCC-F78 | exonic          | <i>CEP350</i>           | nonsynonymous SNV    | NM_014810:c.G6922A:p.E2308K           |                       | chr1  | 180062162 | 180062162 | G  | A |
| ESCC-F78 | exonic          | <i>PDE3B</i>            | nonsynonymous SNV    | NM_000922:c.C1543A:p.P515T            |                       | chr11 | 14839749  | 14839749  | C  | A |
| ESCC-F78 | exonic          | <i>AHNAK2</i>           | nonsynonymous SNV    | NM_138420:c.G14155A:p.D4719N          |                       | chr14 | 105407633 | 105407633 | C  | T |
| ESCC-F78 | exonic          | <i>AHNAK2</i>           | nonsynonymous SNV    | NM_138420:c.C5469A:p.F1823L           |                       | chr14 | 105416319 | 105416319 | G  | T |
| ESCC-F78 | exonic          | <i>ZNF85</i>            | nonsynonymous SNV    | NM_001256173:c.A979T:p.I327F          |                       | chr19 | 21132491  | 21132491  | A  | T |
| ESCC-F78 | exonic          | <i>MUC16</i>            | frameshift insertion | NM_024690:c.4468_4469insT:p.P1490fs   |                       | chr19 | 9087347   | 9087347   | -  | A |
| ESCC-F78 | exonic          | <i>SLC8A1</i>           | nonsynonymous SNV    | NM_001112800:c.G1714A:p.V572I         |                       | chr2  | 40655707  | 40655707  | C  | T |

|          |                 |                         |                      |                                        |                                |       |           |           |    |      |
|----------|-----------------|-------------------------|----------------------|----------------------------------------|--------------------------------|-------|-----------|-----------|----|------|
| ESCC-F78 | exonic          | <i>LRP1B</i>            | stopgain SNV         | NM_018557:c.G10710A:p.W3570X           |                                | chr2  | 141130635 | 141130635 | C  | T    |
| ESCC-F78 | exonic          | <i>PRDM9</i>            | nonsynonymous SNV    | NM_020227:c.G63T:p.K21N                |                                | chr5  | 23509205  | 23509205  | G  | T    |
| ESCC-F78 | exonic          | <i>BAI3</i>             | nonsynonymous SNV    | NM_001704:c.G1334C:p.R445T             |                                | chr6  | 69666054  | 69666054  | G  | C    |
| ESCC-F78 | exonic          | <i>PCLO</i>             | nonsynonymous SNV    | NM_014510:c.G6160C:p.E2054Q            |                                | chr7  | 82584109  | 82584109  | C  | G    |
| ESCC-F78 | exonic          | <i>ZFX4</i>             | stopgain SNV         | NM_024721:c.G439T:p.E147X              |                                | chr8  | 77616762  | 77616762  | G  | T    |
| ESCC-F78 | exonic          | <i>CSMD3</i>            | nonsynonymous SNV    | NM_052900:c.A9635C:p.K3212T            |                                | chr8  | 113259329 | 113259329 | T  | G    |
| ESCC-F78 | exonic          | <i>FAM135B</i>          | nonsynonymous SNV    | NM_015912:c.T3830C:p.L1277P            |                                | chr8  | 139151300 | 139151300 | A  | G    |
| ESCC-F79 | exonic          | <i>TPT2</i>             | nonsynonymous SNV    | NM_130785:c.C203A:p.P68H               |                                | chr13 | 20048132  | 20048132  | G  | T    |
| ESCC-F79 | exonic          | <i>HYDIN</i>            | nonsynonymous SNV    | NM_032821:c.G11828A:p.R3943Q           |                                | chr16 | 70894751  | 70894751  | C  | T    |
| ESCC-F79 | exonic          | <i>ZNF729</i>           | nonsynonymous SNV    | NM_001242680:c.A421G:p.K141E           |                                | chr19 | 22496640  | 22496640  | A  | G    |
| ESCC-F79 | exonic          | <i>TIN</i>              | stopgain SNV         | NM_003319:c.G44689T:p.E14897X          |                                | chr2  | 179438975 | 179438975 | C  | A    |
| ESCC-F79 | exonic          | <i>UNC80</i>            | nonsynonymous SNV    | NM_182587:c.A9443G:p.E3148G            |                                | chr2  | 210860057 | 210860057 | A  | G    |
| ESCC-F79 | exonic          | <i>ZNF717</i>           | nonsynonymous SNV    | NM_001128223:c.G232A:p.A78T            |                                | chr3  | 75790472  | 75790472  | C  | T    |
| ESCC-F79 | exonic          | <i>TRIO</i>             | nonsynonymous SNV    | NM_007118:c.G7979A:p.R2660Q            |                                | chr5  | 14497086  | 14497086  | G  | A    |
| ESCC-F79 | exonic          | <i>PCDHA1</i>           | nonsynonymous SNV    | NM_018900:c.G1375A:p.E459K             |                                | chr5  | 140167250 | 140167250 | G  | A    |
| ESCC-F79 | exonic          | <i>LAMB4</i>            | nonsynonymous SNV    | NM_007356:c.G529A:p.G177R              |                                | chr7  | 107748138 | 107748138 | C  | T    |
| ESCC-F79 | exonic          | <i>CDKN2A</i>           | frameshift deletion  | NM_000077:c.178delG:p.A60fs            | 684052;687455;687457;687563;68 | chr9  | 21971180  | 21971180  | C  | -    |
| ESCC-F79 | exonic          | <i>NOTCH1</i>           | frameshift insertion | NM_017617:c.4542_4543insGCTG:p.C1514fs |                                | chr9  | 139399806 | 139399806 | -  | CAGC |
| ESCC-F80 | exonic          | <i>RGS21</i>            | nonsynonymous SNV    | NM_001039152:c.G241A:p.D81N            |                                | chr1  | 192321329 | 192321329 | G  | A    |
| ESCC-F80 | exonic          | <i>USH2A</i>            | nonsynonymous SNV    | NM_007123:c.T3659C:p.V1220A            |                                | chr1  | 216373121 | 216373121 | A  | G    |
| ESCC-F80 | exonic          | <i>USH2A</i>            | nonsynonymous SNV    | NM_007123:c.G2942A:p.R981H             |                                | chr1  | 216405346 | 216405346 | C  | T    |
| ESCC-F80 | exonic          | <i>FAT3</i>             | nonsynonymous SNV    | NM_001008781:c.C2731T:p.H2411Y         |                                | chr11 | 92533410  | 92533410  | C  | T    |
| ESCC-F80 | exonic          | <i>MLL2</i>             | frameshift deletion  | NM_003482:c.15268delA:p.T5090fs        |                                | chr12 | 49420481  | 49420481  | T  | -    |
| ESCC-F80 | exonic          | <i>SYNE2</i>            | nonsynonymous SNV    | NM_015180:c.G6746A:p.R2249Q            |                                | chr14 | 64496644  | 64496644  | G  | A    |
| ESCC-F80 | exonic          | <i>SYNE2</i>            | nonsynonymous SNV    | NM_015180:c.C14952G:p.I4984M           |                                | chr14 | 64606767  | 64606767  | C  | G    |
| ESCC-F80 | exonic          | <i>TSC2</i>             | nonsynonymous SNV    | NM_001077183:c.G4816A:p.V1606I         |                                | chr16 | 2137891   | 2137891   | G  | A    |
| ESCC-F80 | exonic          | <i>ABCA3</i>            | nonsynonymous SNV    | NM_001089:c.G1327A:p.V433M             |                                | chr16 | 2354110   | 2354110   | C  | T    |
| ESCC-F80 | exonic          | <i>TP53</i>             | nonsynonymous SNV    | NM_001126115:c.G400C:p.G134R           | 753566;905938;907276;909707;91 | chr17 | 7577142   | 7577142   | C  | G    |
| ESCC-F80 | exonic          | <i>MYH8</i>             | nonsynonymous SNV    | NM_002472:c.G5361C:p.K1787N            |                                | chr17 | 10296250  | 10296250  | C  | G    |
| ESCC-F80 | exonic          | <i>HELZ</i>             | nonsynonymous SNV    | NM_014877:c.C4463T:p.S1488L            |                                | chr17 | 65105258  | 65105258  | G  | A    |
| ESCC-F80 | exonic          | <i>TTC21B</i>           | nonsynonymous SNV    | NM_024753:c.G520A:p.D174N              |                                | chr2  | 166799761 | 166799761 | C  | T    |
| ESCC-F80 | exonic          | <i>UNC80</i>            | nonsynonymous SNV    | NM_032504:c.G4306A:p.E1436K            |                                | chr2  | 210761060 | 210761060 | G  | A    |
| ESCC-F80 | exonic          | <i>CHEK2</i>            | nonsynonymous SNV    | NM_145862:c.G1135C:p.V379L             |                                | chr22 | 29091735  | 29091735  | C  | G    |
| ESCC-F80 | exonic          | <i>SCN11A</i>           | nonsynonymous SNV    | NM_014139:c.G1816C:p.E606Q             |                                | chr3  | 38945382  | 38945382  | C  | G    |
| ESCC-F80 | exonic          | <i>MYH15</i>            | nonsynonymous SNV    | NM_014981:c.G1819C:p.E607Q             |                                | chr3  | 108182063 | 108182063 | C  | G    |
| ESCC-F80 | exonic          | <i>PCDHGB1</i>          | nonsynonymous SNV    | NM_018922:c.G6C:p.Q2H                  |                                | chr5  | 140729833 | 140729833 | G  | C    |
| ESCC-F80 | exonic          | <i>DNAH8</i>            | nonsynonymous SNV    | NM_001206927:c.A976G:p.T326A           |                                | chr6  | 38705608  | 38705608  | A  | G    |
| ESCC-F80 | exonic          | <i>CDKN2A</i>           | frameshift deletion  | NM_000077:c.233_234del:p.78del         | 684052;687455;687457;687563;68 | chr9  | 21971124  | 21971125  | GA | -    |
| ESCC-F80 | exonic          | <i>ASPEN</i>            | stopgain SNV         | NM_001193335:c.C266G:p.S89X            | 1331067                        | chr9  | 95236914  | 95236914  | G  | C    |
| ESCC-F81 | exonic          | <i>SPEN</i>             | nonsynonymous SNV    | NM_015001:c.C9910G:p.Q3304E            |                                | chr1  | 16262645  | 16262645  | C  | G    |
| ESCC-F81 | exonic          | <i>CYP2J2</i>           | nonsynonymous SNV    | NM_000775:c.G184C:p.E62Q               |                                | chr1  | 60392235  | 60392235  | C  | G    |
| ESCC-F81 | exonic          | <i>LRRIQ3</i>           | nonsynonymous SNV    | NM_001105659:c.A1294C:p.K432Q          |                                | chr1  | 74507321  | 74507321  | T  | G    |
| ESCC-F81 | exonic          | <i>RCOR3</i>            | nonsynonymous SNV    | NM_018254:c.G118C:p.D40H               |                                | chr1  | 211444642 | 211444642 | G  | C    |
| ESCC-F81 | exonic          | <i>FAM208B</i>          | nonsynonymous SNV    | NM_017782:c.C1618G:p.L540V             |                                | chr10 | 5781751   | 5781751   | C  | G    |
| ESCC-F81 | exonic:splicing | <i>CUBN;CUBN</i>        | nonsynonymous SNV    | NM_001081:c.G2302A:p.V768I             |                                | chr10 | 17113970  | 17113970  | C  | T    |
| ESCC-F81 | exonic          | <i>MYO3A</i>            | nonsynonymous SNV    | NM_017433:c.G1315A:p.E439K             |                                | chr10 | 26359286  | 26359286  | G  | A    |
| ESCC-F81 | exonic          | <i>NRAP</i>             | nonsynonymous SNV    | NM_006175:c.C1780T:p.H594Y             |                                | chr10 | 115389502 | 115389502 | G  | A    |
| ESCC-F81 | exonic          | <i>RB1</i>              | nonsynonymous SNV    | NM_000321:c.G764A:p.R255Q              | 687562;906844;907072;908123;90 | chr13 | 48936996  | 48936996  | G  | A    |
| ESCC-F81 | exonic          | <i>RB1</i>              | stopgain SNV         | NM_000321:c.C1190G:p.S397X             | 687562;906844;907072;908123;90 | chr13 | 48947603  | 48947603  | C  | G    |
| ESCC-F81 | exonic          | <i>DIAPH3</i>           | nonsynonymous SNV    | NM_030932:c.G1537C:p.E513Q             |                                | chr13 | 60485910  | 60485910  | C  | G    |
| ESCC-F81 | exonic          | <i>SYNE2</i>            | nonsynonymous SNV    | NM_015180:c.C8911G:p.Q2971E            |                                | chr14 | 64519542  | 64519542  | C  | G    |
| ESCC-F81 | exonic          | <i>SYNE2</i>            | nonsynonymous SNV    | NM_015180:c.G13451T:p.S4484I           |                                | chr14 | 64591825  | 64591825  | G  | T    |
| ESCC-F81 | exonic          | <i>SPTLC2</i>           | nonsynonymous SNV    | NM_004863:c.G661C:p.E221Q              |                                | chr14 | 78036822  | 78036822  | C  | G    |
| ESCC-F81 | exonic          | <i>PML</i>              | nonsynonymous SNV    | NM_033247:c.C1303T:p.H435Y             |                                | chr15 | 74328396  | 74328396  | C  | T    |
| ESCC-F81 | exonic          | <i>C16orf62</i>         | nonsynonymous SNV    | NM_020314:c.C2525T:p.P842L             |                                | chr16 | 19680518  | 19680518  | C  | T    |
| ESCC-F81 | exonic          | <i>TP53</i>             | stopgain SNV         | NM_001126115:c.C520T:p.R174X           | 749714;749727;753566;905938;90 | chr17 | 7577022   | 7577022   | G  | A    |
| ESCC-F81 | exonic          | <i>TP53</i>             | nonsynonymous SNV    | NM_001126115:c.G73T:p.V25F             | 713878;724834;749721;753589;90 | chr17 | 7578461   | 7578461   | C  | A    |
| ESCC-F81 | exonic          | <i>MUC16</i>            | nonsynonymous SNV    | NM_024690:c.C2339T:p.T7780I            |                                | chr19 | 9064107   | 9064107   | G  | A    |
| ESCC-F81 | exonic          | <i>MUC16</i>            | nonsynonymous SNV    | NM_024690:c.G3325C:p.D1109H            |                                | chr19 | 9088490   | 9088490   | C  | G    |
| ESCC-F81 | exonic          | <i>TPT2</i>             | nonsynonymous SNV    | NM_199260:c.G685T:p.V229F              |                                | chr21 | 10934994  | 10934994  | C  | A    |
| ESCC-F81 | exonic          | <i>PBRM1</i>            | nonsynonymous SNV    | NM_018313:c.G1619C:p.R540T             |                                | chr3  | 52651477  | 52651477  | C  | G    |
| ESCC-F81 | exonic          | <i>MUC4</i>             | nonsynonymous SNV    | NM_018406:c.G1404C:p.R468S             |                                | chr3  | 195517047 | 195517047 | C  | G    |
| ESCC-F81 | exonic          | <i>MUC4</i>             | stopgain SNV         | NM_018406:c.G247T:p.E83X               |                                | chr3  | 195518204 | 195518204 | C  | A    |
| ESCC-F81 | exonic          | <i>NABP2</i>            | nonsynonymous SNV    | NM_018177:c.A1813T:p.S605C             |                                | chr4  | 40119637  | 40119637  | A  | T    |
| ESCC-F81 | exonic          | <i>C6</i>               | nonsynonymous SNV    | NM_000065:c.T1298G:p.F433C             |                                | chr5  | 41161955  | 41161955  | A  | C    |
| ESCC-F81 | exonic          | <i>TMEM232</i>          | nonsynonymous SNV    | NM_001039763:c.A1691C:p.H564P          |                                | chr5  | 109864301 | 109864301 | T  | G    |
| ESCC-F81 | exonic          | <i>ANKHD1;ANKHD1-EL</i> | nonsynonymous SNV    | NM_017747:c.G3398C:p.G1133A            |                                | chr5  | 139885444 | 139885444 | G  | C    |
| ESCC-F81 | exonic          | <i>SYNE1</i>            | nonsynonymous SNV    | NM_033071:c.G7002C:p.L2334F            |                                | chr6  | 152722321 | 152722321 | C  | G    |
| ESCC-F81 | exonic          | <i>ABC1</i>             | nonsynonymous SNV    | NM_000927:c.G1254C:p.Q418H             |                                | chr7  | 87179583  | 87179583  | C  | G    |
| ESCC-F81 | exonic          | <i>MUC17</i>            | nonsynonymous SNV    | NM_001040105:c.G10538C:p.G3513A        | 1475041                        | chr7  | 100685235 | 100685235 | G  | C    |
| ESCC-F81 | exonic          | <i>MGAM</i>             | nonsynonymous SNV    | NM_004668:c.G3374A:p.R1125H            |                                | chr7  | 141755417 | 141755417 | G  | A    |





|          |          |                                             |                        |                                       |                                |       |           |           |     |   |
|----------|----------|---------------------------------------------|------------------------|---------------------------------------|--------------------------------|-------|-----------|-----------|-----|---|
| ESCC-F85 | exonic   | <i>WNK3</i>                                 | nonsynonymous SNV      | NM_001002838:c.G2057C;p.G686A         |                                | chrX  | 54285752  | 54285752  | C   | G |
| ESCC-F86 | exonic   | <i>GSTM5</i>                                | nonsynonymous SNV      | NM_000851:c.G511C;p.E171Q             |                                | chr1  | 110257806 | 110257806 | G   | C |
| ESCC-F86 | exonic   | <i>HMCN1</i>                                | nonsynonymous SNV      | NM_031935:c.G13114A;p.E4372K          |                                | chr1  | 186099713 | 186099713 | G   | A |
| ESCC-F86 | exonic   | <i>PROX1</i>                                | nonsynonymous SNV      | NM_002763:c.T1775C;p.F592S            |                                | chr1  | 214178557 | 214178557 | T   | C |
| ESCC-F86 | exonic   | <i>MK67</i>                                 | nonsynonymous SNV      | NM_001145966:c.G8067C;p.K2689N        |                                | chr10 | 129900957 | 129900957 | C   | G |
| ESCC-F86 | exonic   | <i>MUC5B</i>                                | nonsynonymous SNV      | NM_002458:c.C5610G;p.F1870L           |                                | chr11 | 1263720   | 1263720   | C   | G |
| ESCC-F86 | splicing | <i>A2M(NM_000014:exon19:c.2126-1G&gt;A)</i> |                        |                                       |                                | chr12 | 9246176   | 9246176   | C   | T |
| ESCC-F86 | exonic   | <i>ML2</i>                                  | stopgain SNV           | NM_003482:c.G6031T;p.E2011X           |                                | chr12 | 49435950  | 49435950  | C   | A |
| ESCC-F86 | exonic   | <i>PXN</i>                                  | nonsynonymous SNV      | NM_001080855:c.C476T;p.P159L          |                                | chr12 | 120660683 | 120660683 | G   | A |
| ESCC-F86 | exonic   | <i>BRCA2</i>                                | nonsynonymous SNV      | NM_000059:c.C9168G;p.H3056Q           |                                | chr13 | 32954194  | 32954194  | C   | G |
| ESCC-F86 | exonic   | <i>KLHL1</i>                                | nonsynonymous SNV      | NM_020866:c.T582A;p.H194Q             |                                | chr13 | 70549850  | 70549850  | A   | T |
| ESCC-F86 | exonic   | <i>HECTD1</i>                               | nonsynonymous SNV      | NM_015382:c.C5326T;p.P1776S           |                                | chr14 | 31588985  | 31588985  | G   | A |
| ESCC-F86 | exonic   | <i>CHD2</i>                                 | stopgain SNV           | NM_001271:c.G2767T;p.E923X            |                                | chr15 | 93522404  | 93522404  | G   | T |
| ESCC-F86 | exonic   | <i>ZNF629</i>                               | nonsynonymous SNV      | NM_001080417:c.G40C;p.G14R            |                                | chr16 | 30795764  | 30795764  | C   | G |
| ESCC-F86 | exonic   | <i>TP53</i>                                 | nonsynonymous SNV      | NM_001126115:c.G317T;p.C106F          | 905938:907276:907799:909707:90 | chr17 | 7577568   | 7577568   | C   | A |
| ESCC-F86 | exonic   | <i>TP53</i>                                 | stopgain SNV           | NM_001126118:c.G41A;p.W14X            | 905938:907276:909707:946371:13 | chr17 | 7579529   | 7579529   | C   | T |
| ESCC-F86 | exonic   | <i>CLTC</i>                                 | nonsynonymous SNV      | NM_004859:c.C101T;p.S34F              |                                | chr17 | 57721695  | 57721695  | C   | T |
| ESCC-F86 | exonic   | <i>CEP95</i>                                | nonsynonymous SNV      | NM_138363:c.G1582C;p.E528Q            |                                | chr17 | 62528050  | 62528050  | G   | C |
| ESCC-F86 | exonic   | <i>MUC16</i>                                | nonsynonymous SNV      | NM_024690:c.C16082T;p.S5361F          |                                | chr19 | 9071364   | 9071364   | G   | A |
| ESCC-F86 | exonic   | <i>TTN</i>                                  | nonsynonymous SNV      | NM_003319:c.T20410A;p.S6804T          |                                | chr2  | 179482207 | 179482207 | A   | T |
| ESCC-F86 | exonic   | <i>TTN</i>                                  | nonsynonymous SNV      | NM_133378:c.G23287A;p.D7763N          |                                | chr2  | 179577842 | 179577842 | C   | T |
| ESCC-F86 | exonic   | <i>TTN</i>                                  | nonsynonymous SNV      | NM_003319:c.G9361C;p.E3121Q           |                                | chr2  | 179631312 | 179631312 | C   | G |
| ESCC-F86 | exonic   | <i>TTN</i>                                  | nonsynonymous SNV      | NM_003319:c.G7519A;p.E2507K           |                                | chr2  | 179638034 | 179638034 | C   | T |
| ESCC-F86 | exonic   | <i>SEC14L3</i>                              | nonsynonymous SNV      | NM_174975:c.C169T;p.R57C              |                                | chr22 | 30866204  | 30866204  | G   | A |
| ESCC-F86 | exonic   | <i>PBRM1</i>                                | nonsynonymous SNV      | NM_018313:c.G1747A;p.E583K            |                                | chr3  | 52651349  | 52651349  | C   | T |
| ESCC-F86 | exonic   | <i>ARHGAP31</i>                             | nonsynonymous SNV      | NM_020754:c.C542G;p.S181C             |                                | chr3  | 119101933 | 119101933 | C   | G |
| ESCC-F86 | exonic   | <i>HIST1H2AC</i>                            | nonsynonymous SNV      | NM_003512:c.C244T;p.R82C              |                                | chr6  | 26124704  | 26124704  | C   | T |
| ESCC-F86 | exonic   | <i>CASP8AP2</i>                             | nonsynonymous SNV      | NM_001137667:c.C5536T;p.H1846Y        |                                | chr6  | 90578545  | 90578545  | C   | T |
| ESCC-F86 | exonic   | <i>LAMA4</i>                                | nonsynonymous SNV      | NM_001105206:c.G3490A;p.E1164K        |                                | chr6  | 112455736 | 112455736 | C   | T |
| ESCC-F86 | exonic   | <i>LAMA2</i>                                | nonsynonymous SNV      | NM_000426:c.C143G;p.S48C              |                                | chr6  | 129371093 | 129371093 | C   | G |
| ESCC-F86 | exonic   | <i>PCLO</i>                                 | nonsynonymous SNV      | NM_014510:c.G5758A;p.E1920K           |                                | chr7  | 82584511  | 82584511  | C   | T |
| ESCC-F86 | exonic   | <i>MLL3</i>                                 | nonsynonymous SNV      | NM_170606:c.G3587T;p.R1196I           |                                | chr7  | 151917733 | 151917733 | C   | A |
| ESCC-F86 | exonic   | <i>MLL3</i>                                 | nonsynonymous SNV      | NM_170606:c.G3345C;p.Q1115H           |                                | chr7  | 151919746 | 151919746 | C   | G |
| ESCC-F86 | exonic   | <i>ASPH</i>                                 | nonsynonymous SNV      | NM_001164750:c.G298A;p.E100K          |                                | chr8  | 62566157  | 62566157  | C   | T |
| ESCC-F86 | exonic   | <i>KIAA1429</i>                             | nonsynonymous SNV      | NM_015496:c.C4060T;p.L1354F           |                                | chr8  | 95518765  | 95518765  | G   | A |
| ESCC-F86 | exonic   | <i>FAM135B</i>                              | nonsynonymous SNV      | NM_015912:c.C662A;p.S221Y             |                                | chr8  | 139255192 | 139255192 | G   | T |
| ESCC-F86 | exonic   | <i>RLN1</i>                                 | nonsynonymous SNV      | NM_006911:c.C434T;p.P145L             |                                | chr9  | 5335375   | 5335375   | G   | A |
| ESCC-F86 | exonic   | <i>PTCH1</i>                                | nonsynonymous SNV      | NM_000264:c.C154T;p.R52W              |                                | chr9  | 98270490  | 98270490  | G   | A |
| ESCC-F86 | exonic   | <i>MAP3K15</i>                              | nonsynonymous SNV      | NM_001001671:c.G1792A;p.D598N         |                                | chrX  | 19425358  | 19425358  | C   | T |
| ESCC-F86 | exonic   | <i>GPC3</i>                                 | nonsynonymous SNV      | NM_001164619:c.G928C;p.E310Q          |                                | chrX  | 132833999 | 132833999 | C   | G |
| ESCC-F86 | exonic   | <i>MAGEC1</i>                               | nonsynonymous SNV      | NM_005462:c.G1263C;p.L421F            |                                | chrX  | 140994453 | 140994453 | G   | C |
| ESCC-F87 | exonic   | <i>C1orf65</i>                              | nonsynonymous SNV      | NM_152610:c.C1798T;p.P600S            |                                | chr1  | 223568615 | 223568615 | C   | T |
| ESCC-F87 | exonic   | <i>OBSN</i>                                 | nonsynonymous SNV      | NM_001098623:c.G12952T;p.A4318S       |                                | chr1  | 228497200 | 228497200 | G   | T |
| ESCC-F87 | exonic   | <i>HTRA1</i>                                | nonframeshift deletion | NM_002775:c.1135_1137del;p.379_379del |                                | chr10 | 124269626 | 124269628 | AAG | - |
| ESCC-F87 | exonic   | <i>MK67</i>                                 | nonsynonymous SNV      | NM_001145966:c.G7837C;p.D2613H        |                                | chr10 | 129901187 | 129901187 | C   | G |
| ESCC-F87 | exonic   | <i>MUC6</i>                                 | nonsynonymous SNV      | NM_005961:c.C6022A;p.H2008N           |                                | chr11 | 1016779   | 1016779   | G   | T |
| ESCC-F87 | exonic   | <i>NPAS4</i>                                | nonsynonymous SNV      | NM_178864:c.G1162A;p.E388K            |                                | chr11 | 66191523  | 66191523  | G   | A |
| ESCC-F87 | exonic   | <i>NPAS4</i>                                | nonsynonymous SNV      | NM_178864:c.G2209A;p.G737R            |                                | chr11 | 66192570  | 66192570  | G   | A |
| ESCC-F87 | exonic   | <i>GDPD4</i>                                | nonsynonymous SNV      | NM_182833:c.C1135G;p.P379A            |                                | chr11 | 76954845  | 76954845  | G   | C |
| ESCC-F87 | exonic   | <i>IFLTD1</i>                               | nonsynonymous SNV      | NM_152590:c.G7A;p.E3K                 |                                | chr12 | 25706022  | 25706022  | C   | T |
| ESCC-F87 | exonic   | <i>BRCA2</i>                                | nonsynonymous SNV      | NM_000059:c.C7060G;p.Q2354E           |                                | chr13 | 32929050  | 32929050  | C   | G |
| ESCC-F87 | exonic   | <i>KLHL1</i>                                | stopgain SNV           | NM_020866:c.C877T;p.Q293X             |                                | chr13 | 70514309  | 70514309  | G   | A |
| ESCC-F87 | exonic   | <i>FAN1</i>                                 | nonsynonymous SNV      | NM_001146094:c.G1027A;p.D343N         |                                | chr15 | 31197893  | 31197893  | G   | A |
| ESCC-F87 | exonic   | <i>ZFPX3</i>                                | stopgain SNV           | NM_001164766:c.C1390T;p.Q464X         |                                | chr16 | 72832449  | 72832449  | G   | A |
| ESCC-F87 | exonic   | <i>NF1</i>                                  | nonsynonymous SNV      | NM_000267:c.C825G;p.L275M             | 753620:906833:908135:908450:94 | chr17 | 29509620  | 29509620  | C   | G |
| ESCC-F87 | exonic   | <i>ZNF750</i>                               | stopgain SNV           | NM_024702:c.C768G;p.Y256X             |                                | chr17 | 80789563  | 80789563  | G   | C |
| ESCC-F87 | exonic   | <i>TP53</i>                                 | frameshift deletion    | NM_000546:c.93delT;p.V31fs            | 905938:907276:909707:946371:13 | chr17 | 7579703   | 7579703   | A   | - |
| ESCC-F87 | exonic   | <i>ZNF813</i>                               | nonsynonymous SNV      | NM_001004301:c.C433T;p.H145Y          |                                | chr19 | 53993919  | 53993919  | C   | T |
| ESCC-F87 | exonic   | <i>CYP27C1</i>                              | nonsynonymous SNV      | NM_001001665:c.G695C;p.R232T          |                                | chr2  | 127952935 | 127952935 | C   | G |
| ESCC-F87 | exonic   | <i>PMS1</i>                                 | nonsynonymous SNV      | NM_000534:c.G247C;p.D83H              |                                | chr2  | 190660609 | 190660609 | G   | C |
| ESCC-F87 | exonic   | <i>MAP2</i>                                 | nonsynonymous SNV      | NM_002374:c.G1198C;p.E400Q            |                                | chr2  | 210558092 | 210558092 | G   | C |
| ESCC-F87 | exonic   | <i>PBRM1</i>                                | stopgain SNV           | NM_018313:c.C1148G;p.S383X            |                                | chr3  | 52668771  | 52668771  | G   | C |
| ESCC-F87 | exonic   | <i>ANKRD50</i>                              | nonsynonymous SNV      | NM_001167882:c.C3401T;p.S1134F        |                                | chr4  | 125590494 | 125590494 | G   | A |
| ESCC-F87 | exonic   | <i>FBN2</i>                                 | nonsynonymous SNV      | NM_001999:c.C2977G;p.R993G            |                                | chr5  | 127685051 | 127685051 | G   | C |
| ESCC-F87 | exonic   | <i>PCDHA2</i>                               | nonsynonymous SNV      | NM_018905:c.C1203G;p.F401L            |                                | chr5  | 140175752 | 140175752 | C   | G |
| ESCC-F87 | exonic   | <i>TFAP2B</i>                               | nonsynonymous SNV      | NM_003221:c.C766T;p.R256W             |                                | chr6  | 50803938  | 50803938  | C   | T |
| ESCC-F87 | exonic   | <i>SYNE1</i>                                | nonsynonymous SNV      | NM_033071:c.C22288G;p.Q7430E          |                                | chr6  | 152532717 | 152532717 | G   | C |
| ESCC-F87 | exonic   | <i>THSD7A</i>                               | nonsynonymous SNV      | NM_015204:c.C1424T;p.S475L            |                                | chr7  | 11630116  | 11630116  | G   | A |
| ESCC-F87 | exonic   | <i>SAMD9L</i>                               | nonsynonymous SNV      | NM_152703:c.G2743C;p.D915H            |                                | chr7  | 92762542  | 92762542  | C   | G |
| ESCC-F87 | exonic   | <i>MUC17</i>                                | nonsynonymous SNV      | NM_001040105:c.G4734C;p.L1578F        |                                | chr7  | 100679431 | 100679431 | G   | C |
| ESCC-F87 | exonic   | <i>KIAA1549</i>                             | nonsynonymous SNV      | NM_001164665:c.C4163T;p.S1388L        |                                | chr7  | 138566200 | 138566200 | G   | A |

|          |                 |                                             |                        |                                           |                                |       |           |           |     |   |
|----------|-----------------|---------------------------------------------|------------------------|-------------------------------------------|--------------------------------|-------|-----------|-----------|-----|---|
| ESCC-F87 | exonic          | <i>MLL3</i>                                 | nonsynonymous SNV      | NM_170606:c.G13945C:p.E4649Q              |                                | chr7  | 151843770 | 151843770 | C   | G |
| ESCC-F87 | exonic          | <i>CSMD3</i>                                | nonsynonymous SNV      | NM_052900:c.C3314T:p.S1105F               |                                | chr8  | 113649135 | 113649135 | G   | A |
| ESCC-F87 | exonic          | <i>COL22A1</i>                              | nonsynonymous SNV      | NM_152888:c.C2875A:p.E959K                |                                | chr8  | 139697543 | 139697543 | C   | T |
| ESCC-F87 | exonic          | <i>PTPRD</i>                                | nonsynonymous SNV      | NM_001171025:c.G3472A:p.V1158I            |                                | chr9  | 8341947   | 8341947   | C   | T |
| ESCC-F87 | exonic          | <i>TESK1</i>                                | stopgain SNV           | NM_006285:c.C757T:p.R253X                 |                                | chr9  | 35607970  | 35607970  | C   | T |
| ESCC-F87 | exonic          | <i>HUWE1</i>                                | nonsynonymous SNV      | NM_031407:c.C12321G:p.F14107L             |                                | chrX  | 53563445  | 53563445  | G   | C |
| ESCC-F87 | exonic          | <i>GPR112</i>                               | nonsynonymous SNV      | NM_153834:c.G2336C:p.R779T                |                                | chrX  | 135428201 | 135428201 | G   | C |
| ESCC-F87 | exonic          | <i>MAGEC1</i>                               | nonsynonymous SNV      | NM_005462:c.G445A:p.E149K                 |                                | chrX  | 140993635 | 140993635 | G   | A |
| ESCC-F89 | exonic          | <i>RSP1</i>                                 | nonsynonymous SNV      | NM_016578:c.T1172A:p.L391Q                |                                | chr11 | 77413102  | 77413102  | A   | T |
| ESCC-F89 | exonic          | <i>HYDIN</i>                                | nonsynonymous SNV      | NM_032821:c.C8624T:p.T2875M               |                                | chr16 | 70937857  | 70937857  | G   | A |
| ESCC-F89 | exonic          | <i>ZNF816</i>                               | stopgain SNV           | NM_001202456:c.C421T:p.R141X              |                                | chr19 | 53454607  | 53454607  | G   | A |
| ESCC-F89 | exonic          | <i>MAP2</i>                                 | nonsynonymous SNV      | NM_001039538:c.G602T:p.R201M              |                                | chr2  | 210569259 | 210569259 | G   | T |
| ESCC-F89 | exonic          | <i>ADD1</i>                                 | nonframeshift deletion | NM_001119:c.2152_2154del:p.718_718del     |                                | chr4  | 2930188   | 2930190   | AAG | - |
| ESCC-F89 | exonic          | <i>C7</i>                                   | nonsynonymous SNV      | NM_000587:c.G1504T:p.G502C                |                                | chr5  | 40959565  | 40959565  | G   | T |
| ESCC-F90 | exonic          | <i>MYO3A</i>                                | nonsynonymous SNV      | NM_017433:c.C1924T:p.R642W                |                                | chr10 | 26414347  | 26414347  | C   | T |
| ESCC-F90 | exonic          | <i>MLXIP</i>                                | stopgain SNV           | NM_014938:c.C2056T:p.Q686X                |                                | chr12 | 122622039 | 122622039 | C   | T |
| ESCC-F90 | exonic          | <i>NUFIP2</i>                               | nonsynonymous SNV      | NM_020772:c.G1860C:p.E620D                |                                | chr17 | 27613152  | 27613152  | C   | G |
| ESCC-F90 | exonic          | <i>TRIM37</i>                               | nonsynonymous SNV      | NM_001005207:c.G2483A:p.R828Q             |                                | chr17 | 57093064  | 57093064  | C   | T |
| ESCC-F90 | exonic          | <i>ZNF418</i>                               | stopgain SNV           | NM_133460:c.C1804T:p.R602X                |                                | chr19 | 58437745  | 58437745  | G   | A |
| ESCC-F90 | exonic          | <i>NRXN1</i>                                | nonsynonymous SNV      | NM_004801:c.C1396A:p.H466N                |                                | chr2  | 50780088  | 50780088  | G   | T |
| ESCC-F90 | exonic          | <i>LRP1B</i>                                | nonsynonymous SNV      | NM_018557:c.G8377C:p.E2793Q               |                                | chr2  | 141267518 | 141267518 | C   | G |
| ESCC-F90 | exonic          | <i>TTN</i>                                  | nonsynonymous SNV      | NM_003319:c.C43408T:p.P14470S             |                                | chr2  | 179440256 | 179440256 | G   | A |
| ESCC-F90 | exonic          | <i>PBRM1</i>                                | nonsynonymous SNV      | NM_018313:c.A2114G:p.D705G                |                                | chr3  | 52643782  | 52643782  | T   | C |
| ESCC-F90 | exonic          | <i>COL12A1</i>                              | nonsynonymous SNV      | NM_080645:c.C5497G:p.R1833G               |                                | chr6  | 75798843  | 75798843  | G   | C |
| ESCC-F90 | exonic          | <i>SYNE1</i>                                | frameshift deletion    | NM_033071:c.26162_26163del:p.8721_8721del |                                | chr6  | 152443658 | 152443659 | CT  | - |
| ESCC-F90 | exonic          | <i>FAM75D1</i>                              | nonsynonymous SNV      | NM_001001670:c.T650A:p.L217Q              |                                | chr9  | 84606035  | 84606035  | T   | A |
| ESCC-F90 | exonic          | <i>F8</i>                                   | nonsynonymous SNV      | NM_019863:c.G604T:p.A202S                 |                                | chrX  | 154065919 | 154065919 | C   | A |
| ESCC-F91 | exonic          | <i>BCL9</i>                                 | nonsynonymous SNV      | NM_004326:c.C2989T:p.P997S                |                                | chr1  | 147094158 | 147094158 | C   | T |
| ESCC-F91 | exonic          | <i>NPR1</i>                                 | nonsynonymous SNV      | NM_000906:c.C1348G:p.P450A                |                                | chr1  | 153655936 | 153655936 | C   | G |
| ESCC-F91 | exonic          | <i>CEP350</i>                               | nonsynonymous SNV      | NM_014810:c.G4744T:p.D1582Y               |                                | chr1  | 180017792 | 180017792 | G   | T |
| ESCC-F91 | exonic          | <i>FAM5C</i>                                | nonsynonymous SNV      | NM_199051:c.G2186A:p.R729H                |                                | chr1  | 190067263 | 190067263 | C   | T |
| ESCC-F91 | exonic          | <i>CBUN</i>                                 | nonsynonymous SNV      | NM_001081:c.C2741T:p.S914F                |                                | chr10 | 17110654  | 17110654  | G   | A |
| ESCC-F91 | exonic          | <i>SDHD</i>                                 | nonsynonymous SNV      | NM_003002:c.G436C:p.D146H                 |                                | chr11 | 111965650 | 111965650 | G   | C |
| ESCC-F91 | exonic          | <i>AP0A4</i>                                | nonsynonymous SNV      | NM_000482:c.G136T:p.V46L                  |                                | chr11 | 116693415 | 116693415 | C   | A |
| ESCC-F91 | exonic          | <i>PRPF40B</i>                              | nonsynonymous SNV      | NM_001031698:c.G1765C:p.D589H             |                                | chr12 | 50035754  | 50035754  | G   | C |
| ESCC-F91 | exonic          | <i>KL</i>                                   | nonsynonymous SNV      | NM_004795:c.C1478T:p.S493L                |                                | chr13 | 33629331  | 33629331  | C   | T |
| ESCC-F91 | exonic          | <i>AHNAK2</i>                               | nonsynonymous SNV      | NM_138420:c.T9428G:p.F3143C               |                                | chr14 | 105412360 | 105412360 | A   | C |
| ESCC-F91 | exonic          | <i>AHNAK2</i>                               | nonsynonymous SNV      | NM_138420:c.G136A:p.E46K                  |                                | chr14 | 105423824 | 105423824 | C   | T |
| ESCC-F91 | exonic          | <i>MTMR4</i>                                | nonsynonymous SNV      | NM_004687:c.G739A:p.D247N                 |                                | chr17 | 56584607  | 56584607  | C   | T |
| ESCC-F91 | splicing        | <i>MTMR4(NM_004687:exon9:c.552-1G&gt;A)</i> |                        |                                           |                                | chr17 | 56585636  | 56585636  | C   | T |
| ESCC-F91 | exonic          | <i>PPP2R1A</i>                              | nonsynonymous SNV      | NM_014225:c.G1309A:p.E437K                |                                | chr19 | 52723448  | 52723448  | G   | A |
| ESCC-F91 | exonic          | <i>TTN</i>                                  | nonsynonymous SNV      | NM_003319:c.G70069A:p.E23357K             |                                | chr2  | 179407219 | 179407219 | C   | T |
| ESCC-F91 | exonic          | <i>TTN</i>                                  | nonsynonymous SNV      | NM_003319:c.G6110C:p.R2037T               |                                | chr2  | 179640343 | 179640343 | C   | G |
| ESCC-F91 | exonic          | <i>IMP2</i>                                 | nonsynonymous SNV      | NM_016247:c.G355A:p.E119K                 |                                | chr3  | 101023136 | 101023136 | C   | T |
| ESCC-F91 | exonic          | <i>ZBBX</i>                                 | nonsynonymous SNV      | NM_001199201:c.C643G:p.Q215E              |                                | chr3  | 167051659 | 167051659 | G   | C |
| ESCC-F91 | exonic          | <i>ANK2</i>                                 | nonsynonymous SNV      | NM_020977:c.G5284A:p.V1762I               |                                | chr4  | 114290890 | 114290890 | G   | A |
| ESCC-F91 | exonic          | <i>DNAH5</i>                                | nonsynonymous SNV      | NM_001369:c.C10711G:p.P3571A              |                                | chr5  | 13753503  | 13753503  | G   | C |
| ESCC-F91 | exonic          | <i>PDZD2</i>                                | nonsynonymous SNV      | NM_178140:c.G1018C:p.E340Q                |                                | chr5  | 31995721  | 31995721  | G   | C |
| ESCC-F91 | exonic          | <i>CMYA5</i>                                | nonsynonymous SNV      | NM_153610:c.C7989A:p.S2663R               |                                | chr5  | 79032577  | 79032577  | C   | A |
| ESCC-F91 | exonic          | <i>FAM184A</i>                              | nonsynonymous SNV      | NM_001100411:c.G1264A:p.E422K             |                                | chr6  | 119332503 | 119332503 | C   | T |
| ESCC-F91 | exonic          | <i>PCLO</i>                                 | nonsynonymous SNV      | NM_014510:c.A885T:p.K295N                 |                                | chr7  | 82785072  | 82785072  | T   | A |
| ESCC-F91 | exonic          | <i>TNKS</i>                                 | nonsynonymous SNV      | NM_003747:c.G3595A:p.E1199K               |                                | chr8  | 9623790   | 9623790   | G   | A |
| ESCC-F91 | exonic          | <i>F8</i>                                   | nonsynonymous SNV      | NM_019863:c.G585C:p.Q195H                 |                                | chrX  | 154065938 | 154065938 | C   | G |
| ESCC-F92 | exonic          | <i>FLI1</i>                                 | nonsynonymous SNV      | NM_002019:c.C3374T:p.S1125F               |                                | chr13 | 28891647  | 28891647  | G   | A |
| ESCC-F92 | exonic          | <i>SYNE2</i>                                | nonsynonymous SNV      | NM_015180:c.G12314A:p.R4105K              |                                | chr14 | 64565472  | 64565472  | G   | A |
| ESCC-F92 | exonic          | <i>CREBBP</i>                               | nonsynonymous SNV      | NM_001079846:c.C3300G:p.I1100M            |                                | chr16 | 3808005   | 3808005   | G   | C |
| ESCC-F92 | exonic          | <i>TP53</i>                                 | nonsynonymous SNV      | NM_001126115:c.A92G:p.Y31C                | 688022:724855:749709:753534:90 | chr17 | 7578442   | 7578442   | T   | C |
| ESCC-F92 | exonic          | <i>SKA2</i>                                 | nonsynonymous SNV      | NM_182620:c.G118A:p.E40K                  |                                | chr17 | 57208644  | 57208644  | C   | T |
| ESCC-F92 | exonic          | <i>ZNF831</i>                               | nonsynonymous SNV      | NM_178457:c.C3864G:p.I1288M               |                                | chr20 | 57771049  | 57771049  | C   | G |
| ESCC-F92 | exonic:splicing | <i>INTS9:INTS9</i>                          | nonsynonymous SNV      | NM_001145159:c.C200T:p.T67M               |                                | chr8  | 28695292  | 28695292  | G   | A |
| ESCC-F92 | exonic          | <i>NOTCH1</i>                               | nonsynonymous SNV      | NM_017617:c.G3793A:p.E1265K               |                                | chr9  | 139401276 | 139401276 | C   | T |
| ESCC-F93 | exonic          | <i>LPPR4</i>                                | nonsynonymous SNV      | NM_001166252:c.G1102C:p.E368Q             |                                | chr1  | 99771550  | 99771550  | G   | C |
| ESCC-F93 | exonic          | <i>CACNA1E</i>                              | nonsynonymous SNV      | NM_001205294:c.G3303T:p.K1101N            |                                | chr1  | 181705508 | 181705508 | G   | T |
| ESCC-F93 | exonic          | <i>ZC3H11A</i>                              | nonsynonymous SNV      | NM_014827:c.C800T:p.S267F                 |                                | chr1  | 203800888 | 203800888 | C   | T |
| ESCC-F93 | exonic          | <i>USH2A</i>                                | nonsynonymous SNV      | NM_206933:c.C6344A:p.P2115H               |                                | chr1  | 216173886 | 216173886 | G   | T |
| ESCC-F93 | exonic          | <i>OBSCN</i>                                | nonsynonymous SNV      | NM_001098623:c.C9791T:p.S3264F            |                                | chr1  | 228475641 | 228475641 | C   | T |
| ESCC-F93 | exonic          | <i>MLLT10</i>                               | stopgain SNV           | NM_001195626:c.C86A:p.S29X                |                                | chr10 | 21823659  | 21823659  | C   | A |
| ESCC-F93 | exonic          | <i>PDE3B</i>                                | nonsynonymous SNV      | NM_000922:c.G2122T:p.G708C                |                                | chr11 | 14854295  | 14854295  | G   | T |
| ESCC-F93 | splicing        | <i>DIP2B(NM_173602:exon4:c.302-1G&gt;A)</i> |                        |                                           |                                | chr12 | 51053976  | 51053976  | G   | A |
| ESCC-F93 | exonic          | <i>LRP1</i>                                 | nonsynonymous SNV      | NM_002332:c.G10213A:p.E3405K              |                                | chr12 | 57594586  | 57594586  | G   | A |
| ESCC-F93 | exonic          | <i>NCOR2</i>                                | nonsynonymous SNV      | NM_001077261:c.A4016T:p.H1339L            |                                | chr12 | 124832397 | 124832397 | T   | A |

|          |          |                                                                                |                        |                                      |                                |       |           |           |     |    |
|----------|----------|--------------------------------------------------------------------------------|------------------------|--------------------------------------|--------------------------------|-------|-----------|-----------|-----|----|
| ESCC-F93 | exonic   | <i>PCDH9</i>                                                                   | nonsynonymous SNV      | NM_020403:c.C1396G:p.P466A           |                                | chr13 | 67801177  | 67801177  | G   | C  |
| ESCC-F93 | exonic   | <i>NBEA</i>                                                                    | frameshift insertion   | NM_015678:c.3354_3355insA:p.L1118fs  |                                | chr13 | 35733662  | 35733662  |     | A  |
| ESCC-F93 | exonic   | <i>BRCA2</i>                                                                   | frameshift deletion    | NM_000059:c.3194delT:p.L1065fs       |                                | chr13 | 32911686  | 32911686  | T   | -  |
| ESCC-F93 | exonic   | <i>C14orf43</i>                                                                | nonsynonymous SNV      | NM_001043318:c.G2336T:p.S779I        |                                | chr14 | 74193380  | 74193380  | C   | A  |
| ESCC-F93 | exonic   | <i>DMXL2</i>                                                                   | nonsynonymous SNV      | NM_001174117:c.G4186A:p.D1396N       |                                | chr15 | 51773209  | 51773209  | C   | T  |
| ESCC-F93 | exonic   | <i>MYO9A</i>                                                                   | nonsynonymous SNV      | NM_006901:c.C3982G:p.Q1338E          |                                | chr15 | 72190862  | 72190862  | G   | C  |
| ESCC-F93 | exonic   | <i>GPCRLTM7</i>                                                                | nonsynonymous SNV      | NM_001195021:c.T190C:p.F64L          |                                | chr15 | 102389155 | 102389155 | T   | C  |
| ESCC-F93 | exonic   | <i>PHKB</i>                                                                    | nonsynonymous SNV      | NM_000293:c.A1997C:p.E666A           |                                | chr16 | 47694442  | 47694442  | A   | C  |
| ESCC-F93 | exonic   | <i>NFAT5</i>                                                                   | nonsynonymous SNV      | NM_006599:c.A1102G:p.I368V           |                                | chr16 | 69689662  | 69689662  | A   | G  |
| ESCC-F93 | exonic   | <i>ZFXH3</i>                                                                   | nonsynonymous SNV      | NM_001164766:c.G1886T:p.R629L        |                                | chr16 | 72831953  | 72831953  | C   | A  |
| ESCC-F93 | exonic   | <i>DNAH9</i>                                                                   | nonsynonymous SNV      | NM_004662:c.C2189T:p.A730E           |                                | chr17 | 11872636  | 11872636  | C   | T  |
| ESCC-F93 | exonic   | <i>MUC16</i>                                                                   | nonsynonymous SNV      | NM_024690:c.C3300A:p.L11003I         |                                | chr19 | 9048624   | 9048624   | G   | T  |
| ESCC-F93 | exonic   | <i>MUC16</i>                                                                   | nonsynonymous SNV      | NM_024690:c.C29250G:p.S9750R         |                                | chr19 | 9058196   | 9058196   | G   | C  |
| ESCC-F93 | exonic   | <i>MUC16</i>                                                                   | stopgain SNV           | NM_024690:c.C11669G:p.S3890X         |                                | chr19 | 9075777   | 9075777   | G   | C  |
| ESCC-F93 | exonic   | <i>HNRNPUL1</i>                                                                | nonsynonymous SNV      | NM_007040:c.G1907A:p.G636E           |                                | chr19 | 41808789  | 41808789  | G   | A  |
| ESCC-F93 | exonic   | <i>LRP1B</i>                                                                   | stopgain SNV           | NM_018557:c.C8681G:p.S2894X          |                                | chr2  | 141259425 | 141259425 | G   | C  |
| ESCC-F93 | exonic   | <i>LRP2</i>                                                                    | stopgain SNV           | NM_004525:c.C709T:p.Q237X            |                                | chr2  | 170148823 | 170148823 | G   | A  |
| ESCC-F93 | exonic   | <i>PDE11A</i>                                                                  | nonsynonymous SNV      | NM_016953:c.G50C:p.R17T              |                                | chr2  | 178937115 | 178937115 | C   | G  |
| ESCC-F93 | exonic   | <i>TTN</i>                                                                     | nonsynonymous SNV      | NM_003319:c.G6396T:p.Q2132H          |                                | chr2  | 179639904 | 179639904 | C   | A  |
| ESCC-F93 | exonic   | <i>TTN</i>                                                                     | stopgain SNV           | NM_003319:c.C1909T:p.Q637X           |                                | chr2  | 179654116 | 179654116 | G   | A  |
| ESCC-F93 | exonic   | <i>BP1FC</i>                                                                   | nonsynonymous SNV      | NM_174932:c.C1480G:p.L494V           |                                | chr22 | 32810334  | 32810334  | G   | C  |
| ESCC-F93 | exonic   | <i>PBRM1</i>                                                                   | nonsynonymous SNV      | NM_018313:c.G2129C:p.R710P           |                                | chr3  | 52643767  | 52643767  | C   | G  |
| ESCC-F93 | exonic   | <i>PBRM1</i>                                                                   | nonsynonymous SNV      | NM_018313:c.T1672C:p.Y558H           |                                | chr3  | 52651424  | 52651424  | A   | G  |
| ESCC-F93 | exonic   | <i>ZBBX</i>                                                                    | nonsynonymous SNV      | NM_001199201:c.A480C:p.K160N         |                                | chr3  | 167068256 | 167068256 | T   | G  |
| ESCC-F93 | exonic   | <i>PIK3CA</i>                                                                  | nonsynonymous SNV      | NM_006218:c.G1633A:p.E345K           | 687459;687514;735784;762667;76 | chr3  | 178936091 | 178936091 | G   | A  |
| ESCC-F93 | exonic   | <i>PRDM9</i>                                                                   | nonsynonymous SNV      | NM_020227:c.C32A:p.P11Q              |                                | chr5  | 23509174  | 23509174  | C   | A  |
| ESCC-F93 | exonic   | <i>C5orf42</i>                                                                 | nonsynonymous SNV      | NM_023073:c.G5473A:p.E1825K          |                                | chr5  | 37181056  | 37181056  | C   | T  |
| ESCC-F93 | exonic   | <i>GPR98</i>                                                                   | nonsynonymous SNV      | NM_032119:c.G5132C:p.G171A           |                                | chr5  | 89971081  | 89971081  | G   | C  |
| ESCC-F93 | exonic   | <i>APC</i>                                                                     | nonsynonymous SNV      | NM_001127511:c.T4952C:p.L1651S       | 1109799;1136382                | chr5  | 112176297 | 112176297 | T   | C  |
| ESCC-F93 | exonic   | <i>HIST1H2BH</i>                                                               | nonframeshift deletion | NM_003524:c.68_70del:p.23_24del      |                                | chr6  | 26251946  | 26251948  | AGA | -  |
| ESCC-F93 | exonic   | <i>RAPGEF5</i>                                                                 | nonsynonymous SNV      | NM_012294:c.C1533G:p.F511L           |                                | chr7  | 22186530  | 22186530  | G   | C  |
| ESCC-F93 | exonic   | <i>ABCA13</i>                                                                  | nonsynonymous SNV      | NM_152701:c.G5198C:p.R1733P          |                                | chr7  | 48314461  | 48314461  | G   | C  |
| ESCC-F93 | exonic   | <i>COBL</i>                                                                    | nonsynonymous SNV      | NM_015198:c.C1575G:p.C525W           |                                | chr7  | 51097218  | 51097218  | G   | C  |
| ESCC-F93 | exonic   | <i>PIK3CG</i>                                                                  | nonsynonymous SNV      | NM_002649:c.G2859C:p.M953I           |                                | chr7  | 106524698 | 106524698 | G   | C  |
| ESCC-F93 | exonic   | <i>RP1</i>                                                                     | nonsynonymous SNV      | NM_006269:c.C2294T:p.T765I           |                                | chr8  | 55538736  | 55538736  | C   | T  |
| ESCC-F93 | exonic   | <i>ZFX4</i>                                                                    | nonsynonymous SNV      | NM_024721:c.G6845A:p.R282Q           |                                | chr8  | 77766002  | 77766002  | G   | A  |
| ESCC-F93 | exonic   | <i>SPAG1</i>                                                                   | nonsynonymous SNV      | NM_003114:c.G355C:p.E119Q            |                                | chr8  | 101190098 | 101190098 | G   | C  |
| ESCC-F93 | exonic   | <i>FAM135B</i>                                                                 | nonsynonymous SNV      | NM_015912:c.A1738T:p.S580C           |                                | chr8  | 139164980 | 139164980 | T   | A  |
| ESCC-F93 | exonic   | <i>PTPRD</i>                                                                   | nonsynonymous SNV      | NM_001171025:c.G2317A:p.A773T        |                                | chr9  | 8465600   | 8465600   | C   | T  |
| ESCC-F93 | exonic   | <i>TMEM2</i>                                                                   | nonsynonymous SNV      | NM_001135820:c.C1724T:p.S575F        |                                | chr9  | 74345030  | 74345030  | G   | A  |
| ESCC-F93 | exonic   | <i>ZNF189</i>                                                                  | nonsynonymous SNV      | NM_003452:c.G1042A:p.E348K           |                                | chr9  | 104171092 | 104171092 | G   | A  |
| ESCC-F93 | exonic   | <i>ZNF189</i>                                                                  | nonsynonymous SNV      | NM_003452:c.C1846G:p.Q616E           |                                | chr9  | 104171896 | 104171896 | C   | G  |
| ESCC-F93 | exonic   | <i>GRIN3A</i>                                                                  | nonsynonymous SNV      | NM_133445:c.C1376T:p.S459L           |                                | chr9  | 104433318 | 104433318 | G   | A  |
| ESCC-F94 | splicing | <i>VPS13D(NM_018156:exon36:c.8197+1G&gt;A,NM_015378:exon36:c.8197+1G&gt;A)</i> |                        |                                      |                                | chr1  | 12387912  | 12387912  | G   | C  |
| ESCC-F94 | exonic   | <i>FAM5C</i>                                                                   | nonsynonymous SNV      | NM_199051:c.A1678G:p.T560A           |                                | chr1  | 190067771 | 190067771 | T   | C  |
| ESCC-F94 | exonic   | <i>BIVM-ERCC5,ERCC5</i>                                                        | nonsynonymous SNV      | NM_000123:c.A1612G:p.T538A           |                                | chr13 | 103515111 | 103515111 | A   | G  |
| ESCC-F94 | exonic   | <i>DCAF11</i>                                                                  | nonsynonymous SNV      | NM_001163484:c.G419A:p.R140Q         |                                | chr14 | 24586884  | 24586884  | G   | A  |
| ESCC-F94 | exonic   | <i>STRN3</i>                                                                   | nonsynonymous SNV      | NM_014574:c.C1756G:p.L586V           |                                | chr14 | 31374645  | 31374645  | G   | C  |
| ESCC-F94 | exonic   | <i>DICER1</i>                                                                  | nonsynonymous SNV      | NM_001195573:c.T998A:p.I333N         |                                | chr14 | 95590911  | 95590911  | A   | T  |
| ESCC-F94 | exonic   | <i>TP53</i>                                                                    | frameshift insertion   | NM_001126115:c.493_494insAC:p.H165fs | 753566;905938;907276;909707;91 | chr17 | 7577049   | 7577049   | -   | GT |
| ESCC-F94 | exonic   | <i>LRP1B</i>                                                                   | nonsynonymous SNV      | NM_018557:c.A3673G:p.S1225G          |                                | chr2  | 141660582 | 141660582 | T   | C  |
| ESCC-F94 | exonic   | <i>XIRP2</i>                                                                   | nonsynonymous SNV      | NM_001199144:c.A8618G:p.H2873R       |                                | chr2  | 168107186 | 168107186 | A   | G  |
| ESCC-F94 | exonic   | <i>TTN</i>                                                                     | nonsynonymous SNV      | NM_003319:c.G3271A:p.G1091S          |                                | chr2  | 179645962 | 179645962 | C   | T  |
| ESCC-F94 | exonic   | <i>MAP3K13</i>                                                                 | nonsynonymous SNV      | NM_001242317:c.A221G:p.K74R          |                                | chr3  | 185161415 | 185161415 | A   | G  |
| ESCC-F94 | exonic   | <i>PDZD2</i>                                                                   | frameshift deletion    | NM_178140:c.2025delC:p.S675fs        |                                | chr5  | 32058034  | 32058034  | C   | -  |
| ESCC-F94 | exonic   | <i>CYLC2</i>                                                                   | nonsynonymous SNV      | NM_001340:c.C173G:p.T58R             |                                | chr9  | 105765538 | 105765538 | C   | G  |
| ESCC-F94 | exonic   | <i>TAI1</i>                                                                    | nonsynonymous SNV      | NM_004606:c.G5330T:p.G1777V          |                                | chrX  | 70680524  | 70680524  | G   | T  |
| ESCC-F95 | exonic   | <i>MUTYH</i>                                                                   | nonsynonymous SNV      | NM_001048171:c.G232A:p.E78K          |                                | chr1  | 45799159  | 45799159  | C   | T  |
| ESCC-F95 | exonic   | <i>NRAP</i>                                                                    | nonsynonymous SNV      | NM_006175:c.G54T:p.K18N              |                                | chr10 | 115423588 | 115423588 | C   | A  |
| ESCC-F95 | exonic   | <i>CTNND1</i>                                                                  | nonsynonymous SNV      | NM_001085462:c.C121G:p.L41V          |                                | chr11 | 57559071  | 57559071  | C   | G  |
| ESCC-F95 | exonic   | <i>OTOGL</i>                                                                   | nonsynonymous SNV      | NM_173591:c.C3998A:p.A1333E          |                                | chr12 | 80714424  | 80714424  | C   | A  |
| ESCC-F95 | exonic   | <i>FAM179B</i>                                                                 | nonsynonymous SNV      | NM_015091:c.A2516G:p.K839R           |                                | chr14 | 45473441  | 45473441  | A   | G  |
| ESCC-F95 | splicing | <i>FBN1(NM_000138:exon4:c.165-1G&gt;C)</i>                                     |                        |                                      |                                | chr15 | 48905290  | 48905290  | C   | G  |
| ESCC-F95 | exonic   | <i>XIRP2</i>                                                                   | nonsynonymous SNV      | NM_001199144:c.T9311G:p.V3104G       |                                | chr2  | 168107879 | 168107879 | T   | G  |
| ESCC-F95 | exonic   | <i>C6</i>                                                                      | nonsynonymous SNV      | NM_000065:c.G2766C:p.R922S           |                                | chr5  | 41142966  | 41142966  | C   | G  |
| ESCC-F95 | exonic   | <i>THSD7A</i>                                                                  | nonsynonymous SNV      | NM_015204:c.C1355T:p.T452M           |                                | chr7  | 11630185  | 11630185  | G   | A  |
| ESCC-F95 | exonic   | <i>KDM6A</i>                                                                   | stopgain SNV           | NM_021140:c.C1555T:p.R519X           | 724870;749715;909771;946354    | chrX  | 44922694  | 44922694  | C   | T  |
| ESCC-F96 | exonic   | <i>SHANK2</i>                                                                  | nonsynonymous SNV      | NM_133266:c.G988A:p.G330R            |                                | chr11 | 70333646  | 70333646  | C   | T  |
| ESCC-F96 | exonic   | <i>ML2</i>                                                                     | stopgain SNV           | NM_003482:c.C10841G:p.S3614X         |                                | chr12 | 49427647  | 49427647  | G   | C  |
| ESCC-F96 | exonic   | <i>PCDH9</i>                                                                   | nonsynonymous SNV      | NM_020403:c.C3060A:p.D1020E          |                                | chr13 | 67477714  | 67477714  | G   | T  |
| ESCC-F96 | exonic   | <i>CREBBP</i>                                                                  | nonsynonymous SNV      | NM_001079846:c.T573A:p.S191R         |                                | chr16 | 3900523   | 3900523   | A   | T  |

|           |                 |                                                                                                                 |                      |                                    |                                |       |           |           |   |   |
|-----------|-----------------|-----------------------------------------------------------------------------------------------------------------|----------------------|------------------------------------|--------------------------------|-------|-----------|-----------|---|---|
| ESCC-F96  | exonic          | <i>NLRP1</i>                                                                                                    | nonsynonymous SNV    | NM_001033053:c.C1648T;p.L550F      |                                | chr17 | 5462368   | 5462368   | G | A |
| ESCC-F96  | exonic          | <i>LRP1B</i>                                                                                                    | stopgain SNV         | NM_018557:c.G9765A;p.W3255X        |                                | chr2  | 141215081 | 141215081 | C | T |
| ESCC-F96  | exonic          | <i>TTN</i>                                                                                                      | nonsynonymous SNV    | NM_003319:c.G17176C;p.D5726H       |                                | chr2  | 179494081 | 179494081 | C | G |
| ESCC-F96  | exonic          | <i>DNAH7</i>                                                                                                    | nonsynonymous SNV    | NM_018897:c.G2814A;p.M938I         |                                | chr2  | 196825061 | 196825061 | C | T |
| ESCC-F96  | exonic          | <i>MAB21L2</i>                                                                                                  | nonsynonymous SNV    | NM_006439:c.G494A;p.R165H          |                                | chr4  | 151504675 | 151504675 | G | A |
| ESCC-F96  | exonic          | <i>PHF3</i>                                                                                                     | nonsynonymous SNV    | NM_015153:c.A3358G;p.I1120V        |                                | chr6  | 64413552  | 64413552  | A | G |
| ESCC-F96  | exonic          | <i>ABCA13</i>                                                                                                   | nonsynonymous SNV    | NM_152701:c.A4736T;p.N1579I        |                                | chr7  | 48313999  | 48313999  | A | T |
| ESCC-F97  | exonic          | <i>GBP7</i>                                                                                                     | nonsynonymous SNV    | NM_207398:c.C712T;p.R238W          |                                | chr1  | 89616172  | 89616172  | G | A |
| ESCC-F97  | exonic          | <i>COL11A1</i>                                                                                                  | nonsynonymous SNV    | NM_080630:c.G2533A;p.G845S         |                                | chr1  | 103431078 | 103431078 | C | T |
| ESCC-F97  | exonic          | <i>PROX1</i>                                                                                                    | nonsynonymous SNV    | NM_002763:c.G1243A;p.V415I         |                                | chr1  | 214171121 | 214171121 | G | A |
| ESCC-F97  | exonic          | <i>USH2A</i>                                                                                                    | nonsynonymous SNV    | NM_206933:c.C12357A;p.F4119L       |                                | chr1  | 215848896 | 215848896 | G | T |
| ESCC-F97  | exonic          | <i>HPS5</i>                                                                                                     | nonsynonymous SNV    | NM_007216:c.C2667A;p.F889L         |                                | chr11 | 18305391  | 18305391  | G | T |
| ESCC-F97  | splicing        | <i>STRN3(NM_014574:exon15:c.1885+1G&gt;A,NM_001083893:exon17:c.2137+1G&gt;A)</i>                                |                      |                                    |                                | chr14 | 31371741  | 31371741  | C | T |
| ESCC-F97  | exonic          | <i>ABCA9</i>                                                                                                    | nonsynonymous SNV    | NM_080283:c.C1518G;p.D506E         |                                | chr17 | 67024773  | 67024773  | G | C |
| ESCC-F97  | exonic;splicing | <i>TP53:TP53</i>                                                                                                | frameshift deletion  | NM_000546:c.97delT;p.S33fs         | 905938;907276;909707;946371;13 | chr17 | 7579590   | 7579590   | A | - |
| ESCC-F97  | exonic          | <i>TRAPPC8</i>                                                                                                  | nonsynonymous SNV    | NM_014939:c.G2130T;p.W710C         |                                | chr18 | 29451016  | 29451016  | C | A |
| ESCC-F97  | exonic          | <i>TRIP10</i>                                                                                                   | nonsynonymous SNV    | NM_004240:c.G1498A;p.E500K         |                                | chr19 | 6751082   | 6751082   | G | A |
| ESCC-F97  | exonic          | <i>MUC16</i>                                                                                                    | nonsynonymous SNV    | NM_024690:c.G18363C;p.M6121I       |                                | chr19 | 9069083   | 9069083   | C | G |
| ESCC-F97  | exonic          | <i>EPAS1</i>                                                                                                    | nonsynonymous SNV    | NM_001430:c.A482G;p.D161G          |                                | chr2  | 46587804  | 46587804  | A | G |
| ESCC-F97  | exonic          | <i>FSIP2</i>                                                                                                    | stopgain SNV         | NM_173651:c.C13220G;p.S4407X       |                                | chr2  | 18666696  | 18666696  | C | G |
| ESCC-F97  | exonic          | <i>URB1</i>                                                                                                     | nonsynonymous SNV    | NM_014825:c.T3289G;p.S1097A        |                                | chr21 | 33719844  | 33719844  | A | C |
| ESCC-F97  | exonic          | <i>BPHFC</i>                                                                                                    | nonsynonymous SNV    | NM_174932:c.G1384C;p.D462H         |                                | chr22 | 32811919  | 32811919  | C | G |
| ESCC-F97  | exonic          | <i>DMD</i>                                                                                                      | nonsynonymous SNV    | NM_004017:c.C1033A;p.P345T         |                                | chrX  | 31191708  | 31191708  | G | T |
| ESCC-F98  | exonic          | <i>SZT2</i>                                                                                                     | frameshift insertion | NM_015284:c.2169_2170insC;p.S723fs |                                | chr1  | 43888901  | 43888901  | - | C |
| ESCC-F98  | exonic          | <i>OR4D11</i>                                                                                                   | nonsynonymous SNV    | NM_001004706:c.C671T;p.T224M       |                                | chr11 | 59271719  | 59271719  | C | T |
| ESCC-F98  | exonic          | <i>FAT3</i>                                                                                                     | nonsynonymous SNV    | NM_001008781:c.G4981A;p.V1661I     |                                | chr11 | 92531160  | 92531160  | G | A |
| ESCC-F98  | exonic          | <i>TRHDE</i>                                                                                                    | nonsynonymous SNV    | NM_013381:c.G948T;p.W316C          |                                | chr12 | 72680629  | 72680629  | G | T |
| ESCC-F98  | exonic          | <i>LPIN2</i>                                                                                                    | nonsynonymous SNV    | NM_014646:c.C1616T;p.P539L         |                                | chr18 | 2928593   | 2928593   | G | A |
| ESCC-F98  | exonic          | <i>CEP192</i>                                                                                                   | nonsynonymous SNV    | NM_032142:c.C6718T;p.R2240C        |                                | chr18 | 13100358  | 13100358  | C | T |
| ESCC-F98  | exonic          | <i>ASXL1</i>                                                                                                    | frameshift deletion  | NM_015338:c.1927delG;p.G643fs      | 1470020;1522428;1522440;15224  | chr20 | 31022442  | 31022442  | G | - |
| ESCC-F98  | exonic          | <i>PIWIL3</i>                                                                                                   | nonsynonymous SNV    | NM_001008496:c.G1985C;p.R662P      |                                | chr22 | 25123968  | 25123968  | C | G |
| ESCC-F98  | exonic          | <i>FAT2</i>                                                                                                     | nonsynonymous SNV    | NM_001447:c.G10816A;p.D3606N       |                                | chr5  | 150901338 | 150901338 | C | T |
| ESCC-F98  | exonic          | <i>ABCA13</i>                                                                                                   | nonsynonymous SNV    | NM_152701:c.G13948C;p.E4650Q       |                                | chr7  | 48559787  | 48559787  | G | C |
| ESCC-F99  | exonic          | <i>KLHL1</i>                                                                                                    | nonsynonymous SNV    | NM_020866:c.A836T;p.E279V          |                                | chr13 | 70514350  | 70514350  | T | A |
| ESCC-F99  | exonic          | <i>GPHN</i>                                                                                                     | nonsynonymous SNV    | NM_001024218:c.C1063T;p.L355F      |                                | chr14 | 67555717  | 67555717  | C | T |
| ESCC-F99  | exonic          | <i>TP53</i>                                                                                                     | frameshift deletion  | NM_001126118:c.178delT;p.S60fs     | 905938;907276;909707;946371;13 | chr17 | 7579392   | 7579392   | A | - |
| ESCC-F99  | exonic          | <i>ZNF253</i>                                                                                                   | nonsynonymous SNV    | NM_021047:c.C707T;p.A236V          |                                | chr19 | 20002763  | 20002763  | C | T |
| ESCC-F99  | exonic          | <i>TPTE</i>                                                                                                     | stopgain SNV         | NM_199260:c.C868T;p.Q290X          |                                | chr21 | 10933897  | 10933897  | G | A |
| ESCC-F99  | exonic          | <i>ABCA13</i>                                                                                                   | nonsynonymous SNV    | NM_152701:c.G12375T;p.L4125F       |                                | chr7  | 48452096  | 48452096  | G | T |
| ESCC-F99  | exonic          | <i>VPS13B</i>                                                                                                   | nonsynonymous SNV    | NM_015243:c.C766A;p.H256N          |                                | chr8  | 100127931 | 100127931 | C | A |
| ESCC-F100 | exonic          | <i>USH2A</i>                                                                                                    | stopgain SNV         | NM_206933:c.G4933T;p.G1645X        |                                | chr1  | 216260115 | 216260115 | C | A |
| ESCC-F100 | exonic          | <i>A2M</i>                                                                                                      | nonsynonymous SNV    | NM_000014:c.G3959C;p.G1320A        |                                | chr12 | 9225265   | 9225265   | C | G |
| ESCC-F100 | exonic          | <i>TP53BP1</i>                                                                                                  | nonsynonymous SNV    | NM_001141979:c.G4547A;p.G1516E     |                                | chr15 | 43712637  | 43712637  | C | T |
| ESCC-F100 | exonic          | <i>TP53</i>                                                                                                     | stopgain SNV         | NM_001126115:c.C312A;p.Y104X       | 905938;907276;909707;946371;13 | chr17 | 7577573   | 7577573   | G | T |
| ESCC-F100 | exonic;splicing | <i>ABCA8:ABCA8</i>                                                                                              | nonsynonymous SNV    | NM_007168:c.C4252A;p.Q1418K        |                                | chr17 | 66871873  | 66871873  | G | T |
| ESCC-F100 | exonic          | <i>ZNF708</i>                                                                                                   | nonsynonymous SNV    | NM_021269:c.A580C;p.K194Q          |                                | chr19 | 21477188  | 21477188  | T | G |
| ESCC-F100 | exonic          | <i>NRXN1</i>                                                                                                    | nonsynonymous SNV    | NM_004801:c.G1867A;p.A623T         | 1474963                        | chr2  | 50765667  | 50765667  | C | T |
| ESCC-F100 | exonic          | <i>DNAH6</i>                                                                                                    | nonsynonymous SNV    | NM_001370:c.G7915A;p.V2639M        |                                | chr2  | 84928317  | 84928317  | G | A |
| ESCC-F100 | exonic          | <i>PCLO</i>                                                                                                     | nonsynonymous SNV    | NM_014510:c.C8888A;p.P2963N        |                                | chr7  | 82581381  | 82581381  | G | T |
| ESCC-F100 | splicing        | <i>LAMB4(NM_007356:exon12:c.1360+1G&gt;A)</i>                                                                   |                      |                                    |                                | chr7  | 107738847 | 107738847 | C | T |
| ESCC-F100 | exonic          | <i>PLAG1</i>                                                                                                    | nonsynonymous SNV    | NM_001114634:c.T53C;p.V18A         |                                | chr8  | 57080776  | 57080776  | A | G |
| ESCC-F100 | exonic          | <i>CSMD3</i>                                                                                                    | nonsynonymous SNV    | NM_052900:c.A9728T;p.K3243I        |                                | chr8  | 113256790 | 113256790 | T | A |
| ESCC-F100 | splicing        | <i>CSMD3(NM_198123:exon65:c.10222+1G&gt;A,NM_198124:exon66:c.10102+1G&gt;A,NM_052900:exon63:c.9715+1G&gt;A)</i> |                      |                                    |                                | chr8  | 113259248 | 113259248 | C | T |
| ESCC-F101 | exonic          | <i>CDK11A,CDK11B</i>                                                                                            | nonsynonymous SNV    | NM_024011:c.G304A;p.D102N          |                                | chr1  | 1650818   | 1650818   | C | T |
| ESCC-F101 | exonic          | <i>PTEN</i>                                                                                                     | stopgain SNV         | NM_000314:c.C655T;p.Q219X          | 687563;713885;724838;749712;75 | chr10 | 89717630  | 89717630  | C | T |
| ESCC-F101 | exonic          | <i>PRPF40B</i>                                                                                                  | nonsynonymous SNV    | NM_001031698:c.T2600C;p.L867P      |                                | chr12 | 50037959  | 50037959  | T | C |
| ESCC-F101 | exonic          | <i>SYNM</i>                                                                                                     | unknown              | UNKNOWN                            |                                | chr15 | 99670212  | 99670212  | G | A |
| ESCC-F101 | exonic          | <i>ABCA9</i>                                                                                                    | nonsynonymous SNV    | NM_080283:c.G458C;p.R153T          |                                | chr17 | 67041324  | 67041324  | C | G |
| ESCC-F101 | exonic          | <i>LAMA3</i>                                                                                                    | nonsynonymous SNV    | NM_001127718:c.G2446A;p.E816K      |                                | chr18 | 21494485  | 21494485  | G | A |
| ESCC-F101 | exonic          | <i>SLC9A4</i>                                                                                                   | stopgain SNV         | NM_001011552:c.G1474T;p.E492X      |                                | chr2  | 103125378 | 103125378 | G | T |
| ESCC-F101 | exonic          | <i>LRP1B</i>                                                                                                    | nonsynonymous SNV    | NM_018557:c.A815T;p.D272V          |                                | chr2  | 141986787 | 141986787 | T | A |
| ESCC-F101 | exonic          | <i>XIRP2</i>                                                                                                    | nonsynonymous SNV    | NM_001079810:c.C632T;p.S211L       |                                | chr2  | 168067314 | 168067314 | C | T |
| ESCC-F101 | exonic          | <i>XIRP2</i>                                                                                                    | nonsynonymous SNV    | NM_001199144:c.G3106A;p.D1036N     |                                | chr2  | 168101674 | 168101674 | G | A |
| ESCC-F101 | exonic          | <i>DSPP</i>                                                                                                     | nonsynonymous SNV    | NM_014208:c.C1475A;p.S492Y         |                                | chr4  | 88535289  | 88535289  | C | A |
| ESCC-F101 | exonic          | <i>GPR98</i>                                                                                                    | stopgain SNV         | NM_032119:c.G7948T;p.E2650X        |                                | chr5  | 89992756  | 89992756  | G | T |
| ESCC-F101 | exonic          | <i>MLL3</i>                                                                                                     | nonsynonymous SNV    | NM_170606:c.C2410G;p.L804V         |                                | chr7  | 151945109 | 151945109 | C | A |
| ESCC-F101 | exonic          | <i>ADCY8</i>                                                                                                    | nonsynonymous SNV    | NM_001115:c.G3049A;p.D1017N        |                                | chr8  | 131812683 | 131812683 | C | T |
| ESCC-F101 | exonic          | <i>PTPRD</i>                                                                                                    | nonsynonymous SNV    | NM_001171025:c.A1082T;p.D361V      |                                | chr9  | 8518279   | 8518279   | T | A |
| ESCC-F101 | exonic          | <i>HMCN1</i>                                                                                                    | nonsynonymous SNV    | NM_031935:c.G13454A;p.R4485Q       |                                | chr1  | 186105941 | 186105941 | G | A |
| ESCC-F102 | exonic          | <i>PTEN</i>                                                                                                     | frameshift insertion | NM_000314:c.962_963insA;p.T321fs   | 687563;713885;724838;749712;75 | chr10 | 89720811  | 89720811  | - | A |
| ESCC-F102 | exonic          | <i>ZNF215</i>                                                                                                   | nonsynonymous SNV    | NM_013250:c.G211A;p.E71K           |                                | chr11 | 6953714   | 6953714   | G | A |

|           |        |                  |                      |                                        |                                |       |           |           |    |    |
|-----------|--------|------------------|----------------------|----------------------------------------|--------------------------------|-------|-----------|-----------|----|----|
| ESCC-F102 | exonic | <i>APLNLR</i>    | nonsynonymous SNV    | NM_005161:c.G779A:p.C260Y              |                                | chr11 | 57003700  | 57003700  | C  | T  |
| ESCC-F102 | exonic | <i>APLNLR</i>    | nonsynonymous SNV    | NM_005161:c.G40C:p.D14H                |                                | chr11 | 57004439  | 57004439  | C  | G  |
| ESCC-F102 | exonic | <i>NALCN</i>     | nonsynonymous SNV    | NM_052867:c.T2450C:p.M817T             |                                | chr13 | 101760055 | 101760055 | A  | G  |
| ESCC-F102 | exonic | <i>FLCN</i>      | nonsynonymous SNV    | NM_144997:c.C905G:p.S302C              |                                | chr17 | 17122490  | 17122490  | G  | C  |
| ESCC-F102 | exonic | <i>CYP27C1</i>   | nonsynonymous SNV    | NM_001001665:c.A248G:p.E83G            |                                | chr2  | 127958838 | 127958838 | T  | C  |
| ESCC-F102 | exonic | <i>XIRP2</i>     | nonsynonymous SNV    | NM_001199144:c.G5695T:p.V1899F         |                                | chr2  | 168104263 | 168104263 | G  | T  |
| ESCC-F102 | exonic | <i>CC78L2</i>    | frameshift deletion  | NM_014406:c.731_732del:p.244_244del    |                                | chr22 | 17072709  | 17072710  | AA | -  |
| ESCC-F102 | exonic | <i>MMRN1</i>     | nonsynonymous SNV    | NM_007351:c.G2126A:p.R709H             |                                | chr4  | 90856957  | 90856957  | G  | A  |
| ESCC-F102 | exonic | <i>FAM123B</i>   | nonsynonymous SNV    | NM_152424:c.C407A:p.A136D              | 906825;910689;1105443;1105444; | chrX  | 63412760  | 63412760  | G  | T  |
| ESCC-F103 | exonic | <i>CHD1L</i>     | nonsynonymous SNV    | NM_001256338:c.A1472T:p.E491V          |                                | chr1  | 146758040 | 146758040 | A  | T  |
| ESCC-F103 | exonic | <i>CTNNA3</i>    | nonsynonymous SNV    | NM_001127384:c.C411G:p.I137M           |                                | chr10 | 69299309  | 69299309  | G  | C  |
| ESCC-F103 | exonic | <i>EIF3A</i>     | nonsynonymous SNV    | NM_003750:c.A766G:p.I256V              |                                | chr10 | 120829142 | 120829142 | T  | C  |
| ESCC-F103 | exonic | <i>MGAT4C</i>    | nonsynonymous SNV    | NM_013244:c.G854C:p.C285S              |                                | chr12 | 86373650  | 86373650  | C  | G  |
| ESCC-F103 | exonic | <i>NALCN</i>     | nonsynonymous SNV    | NM_052867:c.A1558G:p.M520V             |                                | chr13 | 101881812 | 101881812 | T  | C  |
| ESCC-F103 | exonic | <i>PRKD1</i>     | nonsynonymous SNV    | NM_002742:c.G1075A:p.D359N             |                                | chr14 | 30105611  | 30105611  | C  | T  |
| ESCC-F103 | exonic | <i>MYH4</i>      | nonsynonymous SNV    | NM_017533:c.G1536C:p.E512D             |                                | chr17 | 10362619  | 10362619  | C  | G  |
| ESCC-F103 | exonic | <i>MYH1</i>      | nonsynonymous SNV    | NM_005963:c.G2628T:p.E876D             |                                | chr17 | 10408190  | 10408190  | C  | A  |
| ESCC-F103 | exonic | <i>ZNF750</i>    | nonsynonymous SNV    | NM_024702:c.G80C:p.C27S                |                                | chr17 | 80790251  | 80790251  | C  | G  |
| ESCC-F103 | exonic | <i>TP53</i>      | frameshift insertion | NM_001126115:c.G34_635insAG;p.L212fs   | 905938;907276;909707;910566;94 | chr17 | 7573997   | 7573997   |    | CT |
| ESCC-F103 | exonic | <i>ZNF100</i>    | nonsynonymous SNV    | NM_173531:c.C1355T:p.T452I             |                                | chr19 | 21909759  | 21909759  | G  | A  |
| ESCC-F103 | exonic | <i>ZNF836</i>    | nonsynonymous SNV    | NM_001102657:c.T1472G:p.I491S          |                                | chr19 | 52659464  | 52659464  | A  | C  |
| ESCC-F103 | exonic | <i>ZNF548</i>    | nonsynonymous SNV    | NM_152909:c.A980C:p.H327P              |                                | chr19 | 57910635  | 57910635  | A  | C  |
| ESCC-F103 | exonic | <i>EP300</i>     | nonsynonymous SNV    | NM_001429:c.G3604C:p.E1202Q            | 1523956                        | chr22 | 41556659  | 41556659  | G  | C  |
| ESCC-F103 | exonic | <i>ORS5K3</i>    | nonsynonymous SNV    | NM_001005516:c.T905A:p.I302N           |                                | chr3  | 98110414  | 98110414  | T  | A  |
| ESCC-F103 | exonic | <i>PIK3CA</i>    | nonsynonymous SNV    | NM_006218:c.G1633A:p.E345K             | 687459;687514;735784;762667;76 | chr3  | 178936091 | 178936091 | G  | A  |
| ESCC-F103 | exonic | <i>CCDC50</i>    | nonsynonymous SNV    | NM_178335:c.C787G:p.R263G              |                                | chr3  | 191093189 | 191093189 | C  | G  |
| ESCC-F103 | exonic | <i>GRIA2</i>     | nonsynonymous SNV    | NM_000826:c.C2557A:p.Q853K             |                                | chr4  | 158284101 | 158284101 | C  | A  |
| ESCC-F103 | exonic | <i>DNAH5</i>     | nonsynonymous SNV    | NM_001369:c.C1271A:p.D4257E            |                                | chr5  | 13716734  | 13716734  | G  | T  |
| ESCC-F103 | exonic | <i>GPR98</i>     | nonsynonymous SNV    | NM_032119:c.C4110G:p.F1370L            |                                | chr5  | 89949501  | 89949501  | C  | G  |
| ESCC-F103 | exonic | <i>HIST1H2AG</i> | nonsynonymous SNV    | NM_021064:c.G360C:p.K120N              |                                | chr6  | 27101210  | 27101210  | G  | C  |
| ESCC-F103 | exonic | <i>MUC17</i>     | nonsynonymous SNV    | NM_001040105:c.G8182A:p.E2728K         |                                | chr7  | 100682879 | 100682879 | G  | A  |
| ESCC-F103 | exonic | <i>MUC17</i>     | nonsynonymous SNV    | NM_001040105:c.A8416G:p.S2806G         |                                | chr7  | 100683113 | 100683113 | A  | G  |
| ESCC-F103 | exonic | <i>MUC17</i>     | nonsynonymous SNV    | NM_001040105:c.A8775T:p.E2925D         |                                | chr7  | 100683472 | 100683472 | A  | T  |
| ESCC-F103 | exonic | <i>MUC17</i>     | nonsynonymous SNV    | NM_001040105:c.T8777G:p.V2926D         |                                | chr7  | 100683474 | 100683474 | T  | G  |
| ESCC-F103 | exonic | <i>MUC17</i>     | nonsynonymous SNV    | NM_001040105:c.G9488T:p.S3163I         |                                | chr7  | 100684185 | 100684185 | G  | T  |
| ESCC-F103 | exonic | <i>MUC17</i>     | nonsynonymous SNV    | NM_001040105:c.T9489G:p.S3163R         |                                | chr7  | 100684186 | 100684186 | T  | G  |
| ESCC-F103 | exonic | <i>LAMB4</i>     | nonsynonymous SNV    | NM_007356:c.C1697T:p.P566L             |                                | chr7  | 107732075 | 107732075 | G  | A  |
| ESCC-F103 | exonic | <i>LAMB4</i>     | nonsynonymous SNV    | NM_007356:c.A1478C:p.Y493S             |                                | chr7  | 107732854 | 107732854 | T  | G  |
| ESCC-F103 | exonic | <i>ZNF189</i>    | nonsynonymous SNV    | NM_003452:c.C775T:p.P259S              |                                | chr9  | 104170825 | 104170825 | C  | T  |
| ESCC-F104 | exonic | <i>PLCH2</i>     | nonsynonymous SNV    | NM_014638:c.G3419A:p.R1140Q            |                                | chr1  | 2435820   | 2435820   | G  | A  |
| ESCC-F104 | exonic | <i>PTPN22</i>    | nonsynonymous SNV    | NM_001193431:c.G148C:p.E50Q            |                                | chr1  | 114402022 | 114402022 | C  | G  |
| ESCC-F104 | exonic | <i>PLXNA2</i>    | nonsynonymous SNV    | NM_025179:c.G4438A:p.E1480K            |                                | chr1  | 208213028 | 208213028 | C  | T  |
| ESCC-F104 | exonic | <i>MLL2</i>      | frameshift insertion | NM_003482:c.10395_10396insGG;p.G3465fs |                                | chr12 | 49428410  | 49428410  |    | C  |
| ESCC-F104 | exonic | <i>RPLP0</i>     | nonsynonymous SNV    | NM_001002:c.C124G:p.Q42E               |                                | chr12 | 120637219 | 120637219 | G  | C  |
| ESCC-F104 | exonic | <i>BRCA2</i>     | nonsynonymous SNV    | NM_000059:c.C1207G:p.L403V             |                                | chr13 | 32906822  | 32906822  | C  | G  |
| ESCC-F104 | exonic | <i>SYNM</i>      | unknown              | UNKNOWN                                |                                | chr15 | 99672489  | 99672489  | C  | G  |
| ESCC-F104 | exonic | <i>HYDIN</i>     | nonsynonymous SNV    | NM_032821:c.C10616T:p.A3539V           |                                | chr16 | 70908761  | 70908761  | G  | A  |
| ESCC-F104 | exonic | <i>MYH4</i>      | nonsynonymous SNV    | NM_017533:c.G4228A:p.A1410T            |                                | chr17 | 10352318  | 10352318  | C  | T  |
| ESCC-F104 | exonic | <i>NUFIP2</i>    | nonsynonymous SNV    | NM_020772:c.C1427T:p.S476L             |                                | chr17 | 27613585  | 27613585  | G  | A  |
| ESCC-F104 | exonic | <i>HELZ</i>      | stopgain SNV         | NM_014877:c.C2338T:p.Q780X             |                                | chr17 | 65147180  | 65147180  | G  | A  |
| ESCC-F104 | exonic | <i>ZNF431</i>    | nonsynonymous SNV    | NM_133473:c.G1231A:p.E411K             |                                | chr19 | 21366337  | 21366337  | G  | A  |
| ESCC-F104 | exonic | <i>ZNF160</i>    | stopgain SNV         | NM_033288:c.G571T:p.E191X              |                                | chr19 | 53573216  | 53573216  | C  | A  |
| ESCC-F104 | exonic | <i>TTN</i>       | nonsynonymous SNV    | NM_003319:c.G76693C:p.E25565Q          |                                | chr2  | 179397454 | 179397454 | C  | G  |
| ESCC-F104 | exonic | <i>TPTE</i>      | nonsynonymous SNV    | NM_199260:c.C697G:p.L233V              |                                | chr21 | 10934982  | 10934982  | G  | C  |
| ESCC-F104 | exonic | <i>FAM194A</i>   | nonsynonymous SNV    | NM_152394:c.G1281T:p.E427D             |                                | chr3  | 150391805 | 150391805 | C  | A  |
| ESCC-F104 | exonic | <i>TRIO</i>      | nonsynonymous SNV    | NM_007118:c.G4132C:p.D1378H            |                                | chr5  | 14391013  | 14391013  | G  | C  |
| ESCC-F104 | exonic | <i>TRIO</i>      | nonsynonymous SNV    | NM_007118:c.G4174C:p.D1392H            |                                | chr5  | 14391055  | 14391055  | G  | C  |
| ESCC-F104 | exonic | <i>PCDHA3</i>    | nonsynonymous SNV    | NM_018906:c.G1244A:p.R415H             |                                | chr5  | 140182026 | 140182026 | G  | A  |
| ESCC-F104 | exonic | <i>FAT2</i>      | nonsynonymous SNV    | NM_001447:c.G3700T:p.D1234Y            |                                | chr5  | 150934168 | 150934168 | C  | A  |
| ESCC-F104 | exonic | <i>RANBP17</i>   | nonsynonymous SNV    | NM_022897:c.G3154A:p.V1052I            |                                | chr5  | 170723002 | 170723002 | G  | A  |
| ESCC-F104 | exonic | <i>XPO5</i>      | nonsynonymous SNV    | NM_020750:c.T2092C:p.Y698H             |                                | chr6  | 43515413  | 43515413  | A  | G  |
| ESCC-F104 | exonic | <i>PHF3</i>      | stopgain SNV         | NM_015153:c.C5416T:p.Q1806X            |                                | chr6  | 64422900  | 64422900  | C  | T  |
| ESCC-F104 | exonic | <i>FAM184A</i>   | nonsynonymous SNV    | NM_001100411:c.C931G:p.L311V           |                                | chr6  | 119341184 | 119341184 | G  | C  |
| ESCC-F104 | exonic | <i>RUNDC3B</i>   | nonsynonymous SNV    | NM_001134405:c.C314T:p.S105L           |                                | chr7  | 87329812  | 87329812  | C  | T  |
| ESCC-F104 | exonic | <i>WRN</i>       | nonsynonymous SNV    | NM_000553:c.C3715G:p.Q1239E            |                                | chr8  | 31012167  | 31012167  | C  | G  |
| ESCC-F104 | exonic | <i>TG</i>        | nonsynonymous SNV    | NM_003235:c.C6599G:p.S2200C            |                                | chr8  | 134030059 | 134030059 | C  | G  |
| ESCC-F104 | exonic | <i>EPFK1</i>     | nonsynonymous SNV    | NM_031308:c.G3078A:p.M1026I            |                                | chr8  | 144944344 | 144944344 | C  | T  |
| ESCC-F104 | exonic | <i>PLEC</i>      | nonsynonymous SNV    | NM_201378:c.C9635T:p.S3212L            |                                | chr8  | 144994312 | 144994312 | G  | A  |
| ESCC-F104 | exonic | <i>DDM</i>       | nonsynonymous SNV    | NM_004011:c.G316A:p.A106T              |                                | chrX  | 32408193  | 32408193  | C  | T  |
| ESCC-F104 | exonic | <i>RPS6KA6</i>   | nonsynonymous SNV    | NM_014496:c.C1220A:p.A407E             |                                | chrX  | 83361940  | 83361940  | G  | T  |
| ESCC-F104 | exonic | <i>F8</i>        | nonsynonymous SNV    | NM_000132:c.C1834T:p.R612C             |                                | chrX  | 154182236 | 154182236 | G  | A  |



|           |          |                                                                                                                                                 |                      |                                     |                                |       |           |           |   |   |
|-----------|----------|-------------------------------------------------------------------------------------------------------------------------------------------------|----------------------|-------------------------------------|--------------------------------|-------|-----------|-----------|---|---|
| ESCC-F105 | exonic   | <i>C10orf71</i>                                                                                                                                 | nonsynonymous SNV    | NM_001135196:c.G2290C;p.D764H       |                                | chr10 | 50532880  | 50532880  | G | C |
| ESCC-F105 | exonic   | <i>MGAT4C</i>                                                                                                                                   | frameshift insertion | NM_013244:c.1175_1176insA;p.L392fs  |                                | chr12 | 86373329  | 86373329  |   | T |
| ESCC-F105 | splicing | <i>TP53(NM_001126117:exon6:c.597+1G&gt;A;NM_001126112:exon10:c.993+1G&gt;A;NM_001126116:exon6:c.597+1G&gt;A;NM_000546:exon10:c.993+1G&gt;A)</i> |                      |                                     | 687802;905938;907276;909707;91 | chr17 | 7576852   | 7576852   | C | T |
| ESCC-F105 | exonic   | <i>ZNF750</i>                                                                                                                                   | nonsynonymous SNV    | NM_024702:c.C37A;p.H13N             |                                | chr17 | 80790294  | 80790294  | G | T |
| ESCC-F105 | exonic   | <i>ZNF17</i>                                                                                                                                    | nonsynonymous SNV    | NM_006959:c.C944G;p.A315G           |                                | chr19 | 57931804  | 57931804  | C | G |
| ESCC-F105 | exonic   | <i>CASP8AP2</i>                                                                                                                                 | nonsynonymous SNV    | NM_001137667:c.C5656T;p.P1886S      |                                | chr6  | 90578665  | 90578665  | C | T |
| ESCC-F106 | exonic   | <i>FUBP1</i>                                                                                                                                    | nonsynonymous SNV    | NM_003902:c.C272T;p.P91L            |                                | chr1  | 78433329  | 78433329  | G | A |
| ESCC-F106 | exonic   | <i>FAM55B</i>                                                                                                                                   | nonsynonymous SNV    | NM_182495:c.A497C;p.K166T           |                                | chr11 | 114569131 | 114569131 | A | C |
| ESCC-F106 | exonic   | <i>SRCAP</i>                                                                                                                                    | frameshift insertion | NM_006662:c.7847_7848insC;p.L2616fs |                                | chr16 | 30749208  | 30749208  |   | C |
| ESCC-F106 | exonic   | <i>ABCA8</i>                                                                                                                                    | nonsynonymous SNV    | NM_007168:c.C4459A;p.P1487T         |                                | chr17 | 66871453  | 66871453  | G | T |
| ESCC-F106 | exonic   | <i>LRP1B</i>                                                                                                                                    | nonsynonymous SNV    | NM_018557:c.G7436A;p.C2479Y         |                                | chr2  | 141298619 | 141298619 | C | T |
| ESCC-F106 | exonic   | <i>SLCA10</i>                                                                                                                                   | nonsynonymous SNV    | NM_001178015:c.G380A;p.R127H        | 1473060                        | chr2  | 162696401 | 162696401 | G | A |
| ESCC-F106 | exonic   | <i>UNC80</i>                                                                                                                                    | nonsynonymous SNV    | NM_032504:c.G4787T;p.W1596L         |                                | chr2  | 210778620 | 210778620 | G | T |
| ESCC-F106 | exonic   | <i>PRDM9</i>                                                                                                                                    | nonsynonymous SNV    | NM_020227:c.G1469T;p.G490V          |                                | chr5  | 23526666  | 23526666  | G | T |
| ESCC-F106 | exonic   | <i>FAT2</i>                                                                                                                                     | frameshift deletion  | NM_001447:c.3096delT;p.F1032fs      |                                | chr5  | 150945397 | 150945397 | A | - |
| ESCC-F106 | exonic   | <i>SYNE1</i>                                                                                                                                    | nonsynonymous SNV    | NM_033071:c.G8542A;p.D2848N         |                                | chr6  | 152706940 | 152706940 | C | T |
| ESCC-F106 | exonic   | <i>FLNC</i>                                                                                                                                     | nonsynonymous SNV    | NM_001127487:c.G7393A;p.E2465K      |                                | chr7  | 128496906 | 128496906 | G | A |
| ESCC-F106 | exonic   | <i>MLL3</i>                                                                                                                                     | nonsynonymous SNV    | NM_170606:c.T1901C;p.V634A          |                                | chr7  | 151945618 | 151945618 | A | G |
| ESCC-F107 | exonic   | <i>KCNT2</i>                                                                                                                                    | nonsynonymous SNV    | NM_198503:c.G786A;p.M262I           |                                | chr1  | 196398740 | 196398740 | C | T |
| ESCC-F107 | exonic   | <i>NAV3</i>                                                                                                                                     | nonsynonymous SNV    | NM_014903:c.C5735A;p.S1912Y         |                                | chr12 | 78582038  | 78582038  | C | A |
| ESCC-F107 | exonic   | <i>PABPC3</i>                                                                                                                                   | nonsynonymous SNV    | NM_030979:c.G835A;p.R278H           |                                | chr13 | 25671169  | 25671169  | G | A |
| ESCC-F107 | exonic   | <i>ERCC4</i>                                                                                                                                    | nonsynonymous SNV    | NM_005236:c.G1774A;p.E592K          |                                | chr16 | 14029563  | 14029563  | G | A |
| ESCC-F107 | exonic   | <i>SI</i>                                                                                                                                       | nonsynonymous SNV    | NM_001041:c.C4450A;p.R1484S         |                                | chr3  | 164716418 | 164716418 | G | T |
| ESCC-F107 | exonic   | <i>FAT1</i>                                                                                                                                     | frameshift insertion | NM_005245:c.8845_8846insA;p.E2949fs |                                | chr4  | 187538895 | 187538895 |   | T |
| ESCC-F108 | exonic   | <i>ARHGAP29</i>                                                                                                                                 | nonsynonymous SNV    | NM_004815:c.C3386T;p.A1129V         |                                | chr1  | 94639825  | 94639825  | G | A |
| ESCC-F108 | exonic   | <i>MICAL2</i>                                                                                                                                   | nonsynonymous SNV    | NM_014632:c.C2843T;p.P948L          |                                | chr11 | 12270789  | 12270789  | C | T |
| ESCC-F108 | splicing | <i>TP53(NM_001126117:exon3:c.276+1G&gt;A;NM_001126112:exon7:c.672+1G&gt;A;NM_001126116:exon3:c.276+1G&gt;A;NM_000546:exon7:c.672+1G&gt;A)</i>   |                      |                                     | 724868;753562;905938;907276;90 | chr17 | 7578176   | 7578176   | C | T |
| ESCC-F108 | exonic   | <i>ZNF85</i>                                                                                                                                    | nonsynonymous SNV    | NM_001256173:c.G1277A;p.G426D       |                                | chr19 | 21132789  | 21132789  | G | A |
| ESCC-F108 | splicing | <i>LRP2(NM_004525:exon48:c.8830+1G&gt;A)</i>                                                                                                    |                      |                                     |                                | chr2  | 170050270 | 170050270 | C | T |
| ESCC-F108 | exonic   | <i>HOXA2</i>                                                                                                                                    | nonsynonymous SNV    | NM_006735:c.C50T;p.S17L             |                                | chr7  | 27142070  | 27142070  | G | A |
| ESCC-F108 | exonic   | <i>ADCY8</i>                                                                                                                                    | nonsynonymous SNV    | NM_001115:c.T3344C;p.V1115A         |                                | chr8  | 131793048 | 131793048 | A | G |
| ESCC-F108 | exonic   | <i>TLR7</i>                                                                                                                                     | nonsynonymous SNV    | NM_016562:c.C975A;p.F325L           | 1456090                        | chrX  | 12904602  | 12904602  | C | A |
| ESCC-F108 | exonic   | <i>DMD</i>                                                                                                                                      | nonsynonymous SNV    | NM_004007:c.G1934A;p.R645Q          |                                | chrX  | 32519949  | 32519949  | C | T |
| ESCC-F109 | exonic   | <i>COL11A1</i>                                                                                                                                  | nonsynonymous SNV    | NM_001190709:c.C342A;p.F114L        |                                | chr1  | 103544360 | 103544360 | G | T |
| ESCC-F109 | exonic   | <i>FMN2</i>                                                                                                                                     | nonsynonymous SNV    | NM_020066:c.G5020C;p.D1674H         |                                | chr1  | 240601470 | 240601470 | G | C |
| ESCC-F109 | exonic   | <i>TTC18</i>                                                                                                                                    | nonsynonymous SNV    | NM_145170:c.C167A;p.A56E            |                                | chr10 | 75113397  | 75113397  | G | T |
| ESCC-F109 | exonic   | <i>TP53</i>                                                                                                                                     | stopgain SNV         | NM_001126115:c.C628T;p.R210X        | 753614;905938;905984;907276;90 | chr17 | 7574003   | 7574003   | G | A |
| ESCC-F109 | exonic   | <i>MYH4</i>                                                                                                                                     | stopgain SNV         | NM_017533:c.A3667T;p.K1223X         |                                | chr17 | 10355329  | 10355329  | T | A |
| ESCC-F109 | exonic   | <i>MYH2</i>                                                                                                                                     | nonsynonymous SNV    | NM_001100112:c.G431A;p.R144Q        |                                | chr17 | 10448737  | 10448737  | C | T |
| ESCC-F109 | exonic   | <i>DNAH9</i>                                                                                                                                    | nonsynonymous SNV    | NM_001372:c.C9671T;p.S3224L         |                                | chr17 | 11757483  | 11757483  | C | T |
| ESCC-F109 | exonic   | <i>MYT1L</i>                                                                                                                                    | nonsynonymous SNV    | NM_015025:c.C3104T;p.A1035V         |                                | chr2  | 1812910   | 1812910   | G | A |
| ESCC-F109 | exonic   | <i>TTN</i>                                                                                                                                      | nonsynonymous SNV    | NM_003319:c.C13625G;p.P4542R        |                                | chr2  | 179504482 | 179504482 | G | C |
| ESCC-F109 | exonic   | <i>TTN</i>                                                                                                                                      | nonsynonymous SNV    | NM_133378:c.C24014T;p.T8005M        |                                | chr2  | 179576811 | 179576811 | G | A |
| ESCC-F109 | exonic   | <i>ANKMY1</i>                                                                                                                                   | nonsynonymous SNV    | NM_016552:c.C739T;p.R247C           |                                | chr2  | 241465810 | 241465810 | G | A |
| ESCC-F109 | exonic   | <i>MUC4</i>                                                                                                                                     | nonsynonymous SNV    | NM_138297:c.G1417A;p.D473N          |                                | chr3  | 195489792 | 195489792 | C | T |
| ESCC-F109 | exonic   | <i>FAT1</i>                                                                                                                                     | stopgain SNV         | NM_005245:c.C6098G;p.S2033X         |                                | chr4  | 187541642 | 187541642 |   | C |
| ESCC-F109 | exonic   | <i>C5orf42</i>                                                                                                                                  | nonsynonymous SNV    | NM_023073:c.C4939A;p.L1647I         |                                | chr5  | 37183344  | 37183344  | G | T |
| ESCC-F109 | exonic   | <i>PCDHA6</i>                                                                                                                                   | nonsynonymous SNV    | NM_018909:c.C389T;p.P130L           |                                | chr5  | 140208065 | 140208065 | C | T |
| ESCC-F109 | exonic   | <i>DSP</i>                                                                                                                                      | nonsynonymous SNV    | NM_001008844:c.G3998A;p.R1333H      |                                | chr6  | 7583290   | 7583290   | G | A |
| ESCC-F109 | exonic   | <i>CASP8AP2</i>                                                                                                                                 | nonsynonymous SNV    | NM_001137667:c.C4480T;p.H1494Y      |                                | chr6  | 90577489  | 90577489  | C | T |
| ESCC-F109 | exonic   | <i>SLC5A1</i>                                                                                                                                   | nonsynonymous SNV    | NM_001146009:c.G2207A;p.R736Q       |                                | chr8  | 70585279  | 70585279  | C | T |
| ESCC-F110 | exonic   | <i>PTEN</i>                                                                                                                                     | stopgain SNV         | NM_000314:c.C1003T;p.R335X          | 687563;713885;724838;749712;75 | chr10 | 89720852  | 89720852  | C | T |
| ESCC-F110 | exonic   | <i>MLL2</i>                                                                                                                                     | stopgain SNV         | NM_003482:c.G5248T;p.E1750X         |                                | chr12 | 49437722  | 49437722  | C | A |
| ESCC-F110 | exonic   | <i>PPFIA2</i>                                                                                                                                   | nonsynonymous SNV    | NM_001220477:c.A301C;p.K101Q        |                                | chr12 | 81839382  | 81839382  | T | G |
| ESCC-F110 | exonic   | <i>TP53</i>                                                                                                                                     | nonsynonymous SNV    | NM_001126115:c.A182G;p.H61R         | 753573;905938;906851;907059;90 | chr17 | 7578271   | 7578271   | T | C |
| ESCC-F110 | exonic   | <i>MUC16</i>                                                                                                                                    | nonsynonymous SNV    | NM_024690:c.G15072T;p.Q5024H        |                                | chr19 | 9072374   | 9072374   | C | A |
| ESCC-F110 | exonic   | <i>LRP1B</i>                                                                                                                                    | stopgain SNV         | NM_018557:c.C5003G;p.S1668X         |                                | chr2  | 141598598 | 141598598 | G | C |
| ESCC-F110 | exonic   | <i>TTN</i>                                                                                                                                      | nonsynonymous SNV    | NM_003319:c.T61778C;p.L20593T       |                                | chr2  | 179418865 | 179418865 | A | G |
| ESCC-F111 | exonic   | <i>PPFIA2</i>                                                                                                                                   | nonsynonymous SNV    | NM_001220479:c.T611A;p.L204H        |                                | chr12 | 81746982  | 81746982  | A | T |
| ESCC-F111 | exonic   | <i>TP53</i>                                                                                                                                     | nonsynonymous SNV    | NM_001126115:c.C353T;p.P118L        | 905938;907066;907276;909707;94 | chr17 | 7577532   | 7577532   | G | A |
| ESCC-F111 | exonic   | <i>MYH13</i>                                                                                                                                    | nonsynonymous SNV    | NM_003802:c.G2575A;p.D859N          |                                | chr17 | 10231299  | 10231299  | C | T |
| ESCC-F111 | exonic   | <i>MYT1L</i>                                                                                                                                    | stopgain SNV         | NM_015025:c.G1159T;p.E387X          |                                | chr2  | 1926382   | 1926382   | C | A |
| ESCC-F111 | exonic   | <i>RASGRP3</i>                                                                                                                                  | nonsynonymous SNV    | NM_015376:c.C1178T;p.T393M          |                                | chr2  | 33764180  | 33764180  | C | T |
| ESCC-F111 | exonic   | <i>TTN</i>                                                                                                                                      | nonsynonymous SNV    | NM_003319:c.C71716T;p.R23906C       |                                | chr2  | 179403751 | 179403751 | G | A |
| ESCC-F111 | exonic   | <i>TTN</i>                                                                                                                                      | nonsynonymous SNV    | NM_003319:c.G37046A;p.R12349H       |                                | chr2  | 179451387 | 179451387 | C | T |
| ESCC-F111 | exonic   | <i>PKR3CA</i>                                                                                                                                   | nonsynonymous SNV    | NM_006218:c.A3140T;p.H1047L         | 687995;749709;753541;753562;75 | chr3  | 178952085 | 178952085 | A | T |
| ESCC-F111 | exonic   | <i>DIRK</i>                                                                                                                                     | nonsynonymous SNV    | NM_002253:c.C2621A;p.A874E          |                                | chr4  | 55962503  | 55962503  | G | T |
| ESCC-F111 | exonic   | <i>DNAH5</i>                                                                                                                                    | nonsynonymous SNV    | NM_001369:c.T13217A;p.L4406H        |                                | chr5  | 13708353  | 13708353  | A | T |
| ESCC-F111 | exonic   | <i>RHAG</i>                                                                                                                                     | nonsynonymous SNV    | NM_000324:c.G760A;p.A254T           |                                | chr6  | 49582447  | 49582447  | C | T |
| ESCC-F111 | exonic   | <i>SYNE1</i>                                                                                                                                    | nonsynonymous SNV    | NM_033071:c.G8097C;p.L2699F         |                                | chr6  | 152711516 | 152711516 | C | G |
| ESCC-F111 | exonic   | <i>MLL3</i>                                                                                                                                     | nonsynonymous SNV    | NM_170606:c.G13652C;p.G4551A        |                                | chr7  | 151845360 | 151845360 | C | G |

|           |                 |                                                                                  |                        |                                         |                                |              |           |           |     |    |
|-----------|-----------------|----------------------------------------------------------------------------------|------------------------|-----------------------------------------|--------------------------------|--------------|-----------|-----------|-----|----|
| ESCC-F111 | exonic          | <i>RP1</i>                                                                       | nonsynonymous SNV      | NM_006269:c.G1252A:p.E418K              |                                | chr8         | 55537694  | 55537694  | G   | A  |
| ESCC-F111 | exonic          | <i>SLC05A1</i>                                                                   | nonsynonymous SNV      | NM_001146009:c.A1755T:p.K585N           |                                | chr8         | 70591717  | 70591717  | T   | A  |
| ESCC-F111 | exonic          | <i>RIMS2</i>                                                                     | stopgain SNV           | NM_014677:c.G1243T:p.G415X              |                                | chr8         | 104927729 | 104927729 | G   | T  |
| ESCC-F111 | exonic          | <i>CSMD3</i>                                                                     | nonsynonymous SNV      | NM_198123:c.G1142T:p.S381I              |                                | chr8         | 113988266 | 113988266 | C   | A  |
| ESCC-F113 | exonic          | <i>OSCP1</i>                                                                     | nonsynonymous SNV      | NM_206837:c.G520A:p.E174K               |                                | chr1         | 36894073  | 36894073  | C   | T  |
| ESCC-F113 | exonic          | <i>CEP350</i>                                                                    | nonsynonymous SNV      | NM_014810:c.G4699A:p.E1567K             |                                | chr1         | 180017747 | 180017747 | G   | A  |
| ESCC-F113 | exonic          | <i>CEP350</i>                                                                    | nonsynonymous SNV      | NM_014810:c.G4744T:p.D1582Y             |                                | chr1         | 180017792 | 180017792 | G   | T  |
| ESCC-F113 | exonic          | <i>SUV39H2</i>                                                                   | nonsynonymous SNV      | NM_024670:c.G638C:p.R213T               |                                | chr10        | 14939485  | 14939485  | G   | C  |
| ESCC-F113 | exonic          | <i>C10orf71</i>                                                                  | nonsynonymous SNV      | NM_001135196:c.C2323T:p.R775W           |                                | chr10        | 50532913  | 50532913  | C   | T  |
| ESCC-F113 | exonic          | <i>PTEN</i>                                                                      | nonsynonymous SNV      | NM_000314:c.G394A:p.G132S               | 687563;713885;724838;753565;75 | chr10        | 89692910  | 89692910  | G   | A  |
| ESCC-F113 | exonic          | <i>NRAP</i>                                                                      | nonsynonymous SNV      | NM_006175:c.C3245G:p.P1082R             |                                | chr10        | 115372141 | 115372141 | G   | C  |
| ESCC-F113 | exonic          | <i>MUC2</i>                                                                      | nonsynonymous SNV      | NM_002457:c.C4787G:p.P1596R             |                                | chr11        | 1092968   | 1092968   | G   | G  |
| ESCC-F113 | exonic          | <i>MLL2</i>                                                                      | nonsynonymous SNV      | NM_003482:c.G16384C:p.D5462H            |                                | chr12        | 49416091  | 49416091  | C   | G  |
| ESCC-F113 | exonic          | <i>PTPN11</i>                                                                    | nonsynonymous SNV      | NM_002834:c.C1471T:p.P491S              |                                | 909291 chr12 | 112926851 | 112926851 | C   | T  |
| ESCC-F113 | exonic          | <i>FLT3</i>                                                                      | nonsynonymous SNV      | NM_004119:c.G286C:p.D96H                |                                | chr13        | 28636086  | 28636086  | C   | G  |
| ESCC-F113 | exonic          | <i>RB1</i>                                                                       | stopgain SNV           | NM_000321:c.C1190G:p.S397X              | 687562;906844;907072;908123;90 | chr13        | 48947603  | 48947603  | C   | G  |
| ESCC-F113 | exonic          | <i>FAM179B</i>                                                                   | nonsynonymous SNV      | NM_015091:c.A410C:p.Y137S               |                                | chr14        | 45432034  | 45432034  | A   | C  |
| ESCC-F113 | exonic          | <i>PTB</i>                                                                       | nonsynonymous SNV      | NM_000347:c.G1543A:p.E515K              |                                | chr14        | 65262156  | 65262156  | C   | T  |
| ESCC-F113 | exonic          | <i>ITGAL</i>                                                                     | nonsynonymous SNV      | NM_001114380:c.A1394T:p.Q465L           |                                | chr16        | 30507557  | 30507557  | A   | T  |
| ESCC-F113 | exonic          | <i>TP53</i>                                                                      | stopgain SNV           | NM_001126115:c.C190T:p.R64X             | 724859;905938;907043;907276;90 | chr17        | 7578263   | 7578263   | G   | A  |
| ESCC-F113 | exonic          | <i>ZNF792</i>                                                                    | nonsynonymous SNV      | NM_175872:c.C805G:p.L269V               |                                | chr19        | 35449954  | 35449954  | G   | C  |
| ESCC-F113 | exonic          | <i>ZNF221</i>                                                                    | nonsynonymous SNV      | NM_013359:c.C709G:p.Q237E               |                                | chr19        | 44470363  | 44470363  | C   | G  |
| ESCC-F113 | exonic          | <i>DNAH6</i>                                                                     | nonsynonymous SNV      | NM_001370:c.G8962C:p.E2988Q             |                                | chr2         | 84934754  | 84934754  | G   | C  |
| ESCC-F113 | exonic          | <i>ITN</i>                                                                       | nonsynonymous SNV      | NM_133378:c.C14529G:p.S4843R            |                                | chr2         | 179594866 | 179594866 | G   | C  |
| ESCC-F113 | exonic          | <i>TTN</i>                                                                       | nonsynonymous SNV      | NM_003319:c.A1626C:p.E542D              |                                | chr2         | 179656835 | 179656835 | T   | G  |
| ESCC-F113 | exonic          | <i>PDZRN3</i>                                                                    | nonsynonymous SNV      | NM_015009:c.G3154A:p.D1052N             |                                | chr3         | 73432563  | 73432563  | C   | T  |
| ESCC-F113 | exonic          | <i>C6</i>                                                                        | nonsynonymous SNV      | NM_000065:c.C1774A:p.P592T              |                                | chr5         | 41159266  | 41159266  | G   | T  |
| ESCC-F113 | exonic          | <i>MLL3</i>                                                                      | nonsynonymous SNV      | NM_170606:c.G14053C:p.E4685Q            |                                | chr7         | 151842359 | 151842359 | C   | G  |
| ESCC-F114 | exonic          | <i>TPR</i>                                                                       | nonsynonymous SNV      | NM_003292:c.G7048A:p.A2350T             |                                | chr1         | 186283147 | 186283147 | C   | T  |
| ESCC-F114 | splicing        | <i>FAM111B</i>                                                                   |                        |                                         |                                | chr11        | 58877012  | 58877012  | G   | C  |
| ESCC-F114 | exonic          | <i>FLT1</i>                                                                      | nonsynonymous SNV      | NM_001159920:c.C1166T:p.S389L           |                                | chr13        | 29001999  | 29001999  | G   | A  |
| ESCC-F114 | exonic          | <i>RB1</i>                                                                       | frameshift insertion   | NM_000321:c.210_211insAG:p.V70fs        | 808521;906844;906849;907043;90 | chr13        | 48881488  | 48881488  | -   | AG |
| ESCC-F114 | exonic          | <i>C16orf70</i>                                                                  | nonsynonymous SNV      | NM_025187:c.C1118T:p.S373F              |                                | chr16        | 67180189  | 67180189  | C   | T  |
| ESCC-F114 | exonic          | <i>CYLD</i>                                                                      | frameshift insertion   | NM_001042355:c.2289_2290insA:p.F763fs   |                                | chr16        | 50826564  | 50826564  | -   | A  |
| ESCC-F114 | exonic          | <i>TP53</i>                                                                      | nonframeshift deletion | NM_001126115:c.450_452del:p.150_151del  | 753566;905938;907276;909707;90 | chr17        | 7577090   | 7577090   | CGC | -  |
| ESCC-F114 | exonic          | <i>ZNF823</i>                                                                    | nonsynonymous SNV      | NM_001080493:c.C896A:p.T299K            |                                | chr19        | 11833453  | 11833453  | G   | T  |
| ESCC-F114 | exonic          | <i>LRP1B</i>                                                                     | nonsynonymous SNV      | NM_018557:c.C11120T:p.P3707L            |                                | chr2         | 141122241 | 141122241 | G   | A  |
| ESCC-F114 | splicing        | <i>TTN(NM_001256850:exon90:c.25250-IG&gt;T;NM_133378:exon89:c.22469-IG&gt;T)</i> |                        |                                         |                                | chr2         | 179579301 | 179579301 | C   | A  |
| ESCC-F114 | exonic          | <i>SLC4A3</i>                                                                    | nonsynonymous SNV      | NM_005070:c.C3310T:p.R1104W             |                                | chr2         | 220505184 | 220505184 | C   | T  |
| ESCC-F114 | exonic          | <i>MLH1</i>                                                                      | nonsynonymous SNV      | NM_000249:c.T464C:p.L155P               | 905959                         | chr3         | 37050315  | 37050315  | T   | C  |
| ESCC-F114 | exonic          | <i>FILIP1L</i>                                                                   | nonsynonymous SNV      | NM_014890:c.C212A:p.A71E                |                                | chr3         | 99569588  | 99569588  | G   | T  |
| ESCC-F114 | exonic          | <i>FBXW7</i>                                                                     | nonsynonymous SNV      | NM_001013415:c.C1039T:p.R347C           | 905952;906763;907000;908138;91 | chr4         | 153249385 | 153249385 | G   | A  |
| ESCC-F114 | exonic          | <i>FAT1</i>                                                                      | frameshift deletion    | NM_005245:c.1080delC:p.F360fs           |                                | chr4         | 187629902 | 187629902 | G   | -  |
| ESCC-F114 | exonic          | <i>NOTCH1</i>                                                                    | frameshift deletion    | NM_017617:c.451_452del:p.151_151del     |                                | chr9         | 139417592 | 139417593 | TT  | -  |
| ESCC-F115 | exonic          | <i>FANCA</i>                                                                     | nonframeshift deletion | NM_000135:c.3788_3790del:p.L263_1264del |                                | chr16        | 89807250  | 89807252  | AG  | -  |
| ESCC-F115 | exonic          | <i>TP53</i>                                                                      | nonsynonymous SNV      | NM_001126115:c.G329T:p.C110F            | 753622;905938;906833;907276;90 | chr17        | 7577556   | 7577556   | C   | A  |
| ESCC-F115 | exonic          | <i>AP2B1</i>                                                                     | nonsynonymous SNV      | NM_001282:c.G2711A:p.R904H              | 1475133                        | chr17        | 34044340  | 34044340  | G   | A  |
| ESCC-F115 | exonic          | <i>RGNEF</i>                                                                     | nonsynonymous SNV      | NM_001080479:c.A323G:p.N108S            |                                | chr5         | 73048875  | 73048875  | A   | G  |
| ESCC-F115 | exonic          | <i>ZFX4</i>                                                                      | nonsynonymous SNV      | NM_024721:c.G4099A:p.D1367N             |                                | chr8         | 77763256  | 77763256  | G   | A  |
| ESCC-F116 | exonic          | <i>BRCA2</i>                                                                     | nonsynonymous SNV      | NM_000059:c.A4787T:p.N1596I             |                                | chr13        | 32913279  | 32913279  | A   | T  |
| ESCC-F116 | exonic          | <i>TTN</i>                                                                       | nonsynonymous SNV      | NM_003319:c.G56703T:p.E1890I            |                                | chr2         | 179426961 | 179426961 | C   | A  |
| ESCC-F116 | exonic          | <i>PIK3CA</i>                                                                    | nonsynonymous SNV      | NM_006218:c.A3140G:p.H1047R             | 687995;749709;753541;753562;75 | chr3         | 178952085 | 178952085 | A   | G  |
| ESCC-F116 | exonic          | <i>FAT1</i>                                                                      | nonsynonymous SNV      | NM_005245:c.C11284A:p.H3762N            |                                | chr4         | 187524396 | 187524396 | G   | T  |
| ESCC-F117 | splicing        | <i>ARID1A(NM_006015:exon8:c.2732+2T&gt;C;NM_139135:exon8:c.2732+2T&gt;C)</i>     |                        |                                         |                                | chr1         | 27089778  | 27089778  | T   | C  |
| ESCC-F117 | splicing        | <i>E1F2C1(NM_012199:exon18:c.2266-IG&gt;A)</i>                                   |                        |                                         |                                | chr1         | 36384655  | 36384655  | G   | A  |
| ESCC-F117 | exonic          | <i>TP53</i>                                                                      | nonsynonymous SNV      | NM_001126115:c.C373G:p.L125V            | 905938;907276;907321;909707;94 | chr17        | 7577512   | 7577512   | C   | C  |
| ESCC-F117 | splicing        | <i>ZNF207(NM_003457:exon1:c.41+IG&gt;C;NM_001098507:exon1:c.41+IG&gt;C)</i>      |                        |                                         |                                | chr17        | 30677346  | 30677346  | G   | C  |
| ESCC-F117 | exonic          | <i>ANKRD12</i>                                                                   | nonsynonymous SNV      | NM_001083625:c.C2862G:p.H954Q           |                                | chr18        | 9256196   | 9256196   | G   | G  |
| ESCC-F117 | exonic          | <i>MUC16</i>                                                                     | nonsynonymous SNV      | NM_024690:c.C4344T:p.R1448I             |                                | chr19        | 8959691   | 8959691   | G   | A  |
| ESCC-F117 | exonic;splicing | <i>LRP1B;LRP1B</i>                                                               | nonsynonymous SNV      | NM_018557:c.A10415T:p.D3472V            |                                | chr2         | 141143578 | 141143578 | T   | A  |
| ESCC-F117 | exonic          | <i>LRP2</i>                                                                      | nonsynonymous SNV      | NM_004525:c.A7223G:p.H2408R             |                                | chr2         | 170063007 | 170063007 | T   | C  |
| ESCC-F117 | exonic          | <i>TAAR8</i>                                                                     | nonsynonymous SNV      | NM_053278:c.C944T:p.P315L               |                                | chr6         | 132874775 | 132874775 | C   | T  |
| ESCC-F117 | exonic          | <i>ZNF716</i>                                                                    | nonsynonymous SNV      | NM_001159279:c.A242T:p.E81V             |                                | chr7         | 57522854  | 57522854  | A   | T  |
| ESCC-F118 | exonic          | <i>CTNNA3</i>                                                                    | nonsynonymous SNV      | NM_001127384:c.G1220A:p.R407Q           |                                | chr10        | 68526083  | 68526083  | C   | T  |
| ESCC-F118 | exonic          | <i>LRKK2</i>                                                                     | nonsynonymous SNV      | NM_198578:c.G1517A:p.R506Q              |                                | chr12        | 40653380  | 40653380  | G   | A  |
| ESCC-F118 | exonic          | <i>NBEA</i>                                                                      | nonsynonymous SNV      | NM_015678:c.G1688C:p.R563T              |                                | chr13        | 35683434  | 35683434  | G   | C  |
| ESCC-F118 | exonic          | <i>TP53</i>                                                                      | stopgain SNV           | NM_001126115:c.C306A:p.Y102X            | 905938;907050;907276;909707;94 | chr17        | 7577579   | 7577579   | G   | T  |
| ESCC-F118 | exonic          | <i>MUC16</i>                                                                     | nonsynonymous SNV      | NM_024690:c.G40261T:p.G13421C           |                                | chr19        | 9002555   | 9002555   | C   | A  |
| ESCC-F118 | exonic          | <i>MUC16</i>                                                                     | nonsynonymous SNV      | NM_024690:c.G28416A:p.M9472I            |                                | chr19        | 9059030   | 9059030   | C   | T  |
| ESCC-F118 | exonic          | <i>ZNF442</i>                                                                    | nonsynonymous SNV      | NM_030824:c.C1099T:p.H367Y              |                                | chr19        | 12461300  | 12461300  | G   | A  |
| ESCC-F118 | exonic          | <i>ALK</i>                                                                       | nonsynonymous SNV      | NM_004304:c.G1645C:p.E549Q              |                                | chr2         | 29541172  | 29541172  | C   | G  |

|           |                 |                                                                                                                                             |                        |                                          |                                |       |           |           |     |    |
|-----------|-----------------|---------------------------------------------------------------------------------------------------------------------------------------------|------------------------|------------------------------------------|--------------------------------|-------|-----------|-----------|-----|----|
| ESCC-F118 | exonic          | <i>PDE11A</i>                                                                                                                               | nonsynonymous SNV      | NM_001077196:c.G892A:p.V298M             |                                | chr2  | 178565869 | 178565869 | C   | T  |
| ESCC-F118 | exonic          | <i>PRRC2A</i>                                                                                                                               | nonsynonymous SNV      | NM_004638:c.G6209C:p.G2070A              |                                | chr6  | 31604880  | 31604880  | G   | C  |
| ESCC-F118 | exonic          | <i>SLC26A8</i>                                                                                                                              | nonsynonymous SNV      | NM_138718:c.G1565A:p.R522Q               |                                | chr6  | 35923281  | 35923281  | C   | T  |
| ESCC-F118 | exonic          | <i>LAMA4</i>                                                                                                                                | nonsynonymous SNV      | NM_001105206:c.G4169A:p.R1390Q           |                                | chr6  | 112450242 | 112450242 | C   | T  |
| ESCC-F118 | exonic          | <i>ABCB5</i>                                                                                                                                | nonsynonymous SNV      | NM_001163941:c.C689T:p.S230L             |                                | chr7  | 20685389  | 20685389  | C   | T  |
| ESCC-F118 | exonic          | <i>BCOR</i>                                                                                                                                 | nonsynonymous SNV      | NM_001123384:c.G4450T:p.D1484Y           |                                | chrX  | 39914756  | 39914756  | C   | A  |
| ESCC-F119 | exonic          | <i>AHNAK2</i>                                                                                                                               | nonsynonymous SNV      | NM_138420:c.A6179C:p.H2060P              |                                | chr14 | 105415609 | 105415609 | T   | G  |
| ESCC-F119 | exonic          | <i>MYH4</i>                                                                                                                                 | nonsynonymous SNV      | NM_017533:c.G4762A:p.D1588N              |                                | chr17 | 10351338  | 10351338  | C   | T  |
| ESCC-F119 | exonic          | <i>GNAS</i>                                                                                                                                 | nonsynonymous SNV      | NM_001077490:c.C1559T:p.T520M            |                                | chr20 | 57430066  | 57430066  | C   | T  |
| ESCC-F119 | exonic          | <i>SCN5A</i>                                                                                                                                | nonsynonymous SNV      | NM_001099405:c.G5185A:p.V1729M           |                                | chr3  | 38592624  | 38592624  | C   | T  |
| ESCC-F119 | exonic          | <i>BAP1</i>                                                                                                                                 | nonsynonymous SNV      | NM_004656:c.A304G:p.N102D                |                                | chr3  | 52442045  | 52442045  | T   | C  |
| ESCC-F119 | exonic          | <i>NOTCH1</i>                                                                                                                               | stopgain SNV           | NM_017617:c.G3442T:p.E1148X              |                                | chr9  | 139402475 | 139402475 | C   | A  |
| ESCC-F120 | splicing        | <i>USP24(NM_015306:exon56:c.6555-1G&gt;A)</i>                                                                                               |                        |                                          |                                | chr1  | 55555414  | 55555414  | C   | T  |
| ESCC-F120 | exonic          | <i>COL11A1</i>                                                                                                                              | frameshift deletion    | NM_080630:c.1287delG:p.G429fs            |                                | chr1  | 103474067 | 103474067 | C   | T  |
| ESCC-F120 | exonic          | <i>PPM1J</i>                                                                                                                                | nonsynonymous SNV      | NM_005167:c.C517A:p.L173M                |                                | chr1  | 113255578 | 113255578 | G   | T  |
| ESCC-F120 | exonic          | <i>CACNA1E</i>                                                                                                                              | nonsynonymous SNV      | NM_001205294:c.G2489A:p.R830H            |                                | chr1  | 181701768 | 181701768 | G   | A  |
| ESCC-F120 | exonic          | <i>PHF11</i>                                                                                                                                | frameshift deletion    | NM_006608:c.2074_2075del:p.692_692del    |                                | chr1  | 114242393 | 114242394 | TT  | -  |
| ESCC-F120 | exonic          | <i>CEP350</i>                                                                                                                               | frameshift deletion    | NM_014810:c.3362delA:p.E1121fs           |                                | chr1  | 179991959 | 179991959 | A   | -  |
| ESCC-F120 | exonic          | <i>PPP1R12B</i>                                                                                                                             | frameshift deletion    | NM_001167857:c.1496delT:p.V499fs         |                                | chr1  | 202407190 | 202407190 | T   | -  |
| ESCC-F120 | exonic          | <i>ADRA2A</i>                                                                                                                               | nonsynonymous SNV      | NM_000681:c.C233T:p.A78V                 |                                | chr10 | 112837987 | 112837987 | C   | T  |
| ESCC-F120 | exonic;splicing | <i>TTC18;TTC18</i>                                                                                                                          | frameshift deletion    | NM_145170:c.348delA:p.E116fs             |                                | chr10 | 75108182  | 75108182  | T   | -  |
| ESCC-F120 | exonic          | <i>ZNF518A</i>                                                                                                                              | unknown                | UNKNOWN                                  |                                | chr10 | 97918856  | 97918856  | A   | -  |
| ESCC-F120 | exonic          | <i>PDE3B</i>                                                                                                                                | nonsynonymous SNV      | NM_000922:c.A2681T:p.D894V               |                                | chr11 | 14880749  | 14880749  | A   | T  |
| ESCC-F120 | exonic          | <i>HEPH1</i>                                                                                                                                | nonsynonymous SNV      | NM_001098672:c.A2044G:p.M682V            |                                | chr11 | 93819319  | 93819319  | A   | G  |
| ESCC-F120 | exonic          | <i>TBRG1</i>                                                                                                                                | nonsynonymous SNV      | NM_032811:c.A571G:p.T191A                |                                | chr11 | 124496485 | 124496485 | A   | G  |
| ESCC-F120 | exonic          | <i>MLL2</i>                                                                                                                                 | stopgain SNV           | NM_003482:c.C10841G:p.S3614X             |                                | chr12 | 49427647  | 49427647  | G   | C  |
| ESCC-F120 | exonic          | <i>NAV3</i>                                                                                                                                 | nonsynonymous SNV      | NM_014903:c.A5612G:p.E1871G              |                                | chr12 | 78574811  | 78574811  | A   | G  |
| ESCC-F120 | exonic          | <i>PPF1A2</i>                                                                                                                               | nonsynonymous SNV      | NM_001220478:c.G394A:p.A132T             |                                | chr12 | 81799637  | 81799637  | C   | T  |
| ESCC-F120 | exonic          | <i>MLL2</i>                                                                                                                                 | stopgain SNV           | NM_003482:c.6991delC:p.L2331X            |                                | chr12 | 49434562  | 49434562  | G   | -  |
| ESCC-F120 | exonic          | <i>MYO16</i>                                                                                                                                | frameshift deletion    | NM_001198950:c.2584delT:p.F862fs         |                                | chr13 | 109661386 | 109661386 | T   | -  |
| ESCC-F120 | exonic          | <i>ITGAL</i>                                                                                                                                | nonsynonymous SNV      | NM_001114380:c.G1402A:p.V468M            |                                | chr16 | 30507565  | 30507565  | G   | A  |
| ESCC-F120 | exonic          | <i>CDH1</i>                                                                                                                                 | nonsynonymous SNV      | NM_004360:c.G1759C:p.D587H               |                                | chr16 | 68855951  | 68855951  | G   | C  |
| ESCC-F120 | exonic          | <i>HYDIN</i>                                                                                                                                | frameshift deletion    | NM_001198542:c.2622delA:p.K874fs         |                                | chr16 | 71065809  | 71065809  | T   | -  |
| ESCC-F120 | exonic          | <i>ZFH3</i>                                                                                                                                 | nonframeshift deletion | NM_001164766:c.2479_2481del:p.827_827del |                                | chr16 | 72831358  | 72831360  | TTG | -  |
| ESCC-F120 | exonic          | <i>ANKRD11</i>                                                                                                                              | nonsynonymous SNV      | NM_001256183:c.C4196T:p.A1399V           |                                | chr16 | 89348754  | 89348754  | G   | A  |
| ESCC-F120 | exonic          | <i>TP53</i>                                                                                                                                 | nonsynonymous SNV      | NM_001126115:c.T14A:p.L5Q                | 905938;907276;909707;946371;13 | chr17 | 7578520   | 7578520   | A   | T  |
| ESCC-F120 | exonic          | <i>MYH1</i>                                                                                                                                 | nonsynonymous SNV      | NM_005963:c.G946A:p.V316I                |                                | chr17 | 10416060  | 10416060  | C   | T  |
| ESCC-F120 | exonic          | <i>MYH2</i>                                                                                                                                 | nonsynonymous SNV      | NM_001100112:c.C1067T:p.T356M            |                                | chr17 | 10443325  | 10443325  | G   | A  |
| ESCC-F120 | exonic          | <i>SLC9A3R1</i>                                                                                                                             | frameshift deletion    | NM_004252:c.906delC:p.S302fs             |                                | chr17 | 72764624  | 72764624  | C   | -  |
| ESCC-F120 | exonic          | <i>THOC1</i>                                                                                                                                | frameshift insertion   | NM_005131:c.1108_1109insC:p.D370fs       |                                | chr18 | 225118    | 225118    | -   | G  |
| ESCC-F120 | exonic          | <i>STK11</i>                                                                                                                                | frameshift deletion    | NM_000455:c.837delC:p.G279fs             | 687814;753585;906825;907319;91 | chr19 | 1221314   | 1221314   | C   | -  |
| ESCC-F120 | exonic          | <i>MYT1L</i>                                                                                                                                | nonsynonymous SNV      | NM_015025:c.G2683A:p.A895T               |                                | chr2  | 1890333   | 1890333   | C   | T  |
| ESCC-F120 | exonic          | <i>DNMT3A</i>                                                                                                                               | nonsynonymous SNV      | NM_153759:c.G386A:p.R129Q                |                                | chr2  | 25470521  | 25470521  | C   | T  |
| ESCC-F120 | exonic          | <i>MYT1L</i>                                                                                                                                | frameshift insertion   | NM_015025:c.102_103insC:p.P34fs          |                                | chr2  | 1982987   | 1982987   | -   | G  |
| ESCC-F120 | exonic          | <i>SPAST</i>                                                                                                                                | nonframeshift deletion | NM_014946:c.635_637del:p.212_213del      |                                | chr2  | 32323913  | 32323915  | ATA | -  |
| ESCC-F120 | exonic          | <i>TTN</i>                                                                                                                                  | nonsynonymous SNV      | NM_003319:c.G39764A:p.R13255H            |                                | chr2  | 179445147 | 179445147 | C   | T  |
| ESCC-F120 | exonic          | <i>TTN</i>                                                                                                                                  | nonsynonymous SNV      | NM_133378:c.C24236T:p.A8079V             |                                | chr2  | 179575995 | 179575995 | G   | A  |
| ESCC-F120 | exonic          | <i>MAP2</i>                                                                                                                                 | nonsynonymous SNV      | NM_031845:c.C1243T:p.R415C               |                                | chr2  | 210594948 | 210594948 | C   | T  |
| ESCC-F120 | exonic          | <i>FSIP2</i>                                                                                                                                | frameshift deletion    | NM_173651:c.10507delA:p.K3503fs          |                                | chr2  | 186662103 | 186662103 | A   | -  |
| ESCC-F120 | splicing        | <i>SEPT2(NM_006155:exon7:c.477-1G&gt;C;NM_001008491:exon8:c.477-1G&gt;C;NM_004404:exon7:c.477-1G&gt;C;NM_001008492:exon8:c.477-1G&gt;C)</i> |                        |                                          |                                | chr2  | 242277087 | 242277087 | G   | C  |
| ESCC-F120 | exonic          | <i>ZC3H7B</i>                                                                                                                               | nonsynonymous SNV      | NM_017590:c.T476A:p.L159Q                |                                | chr22 | 41726058  | 41726058  | T   | A  |
| ESCC-F120 | exonic          | <i>EP300</i>                                                                                                                                | frameshift deletion    | NM_001429:c.3702delA:p.R1234fs           | 1523956                        | chr22 | 41558757  | 41558757  | A   | -  |
| ESCC-F120 | exonic          | <i>ARPP21</i>                                                                                                                               | nonsynonymous SNV      | NM_016300:c.C2011T:p.P671S               |                                | chr3  | 35785436  | 35785436  | C   | T  |
| ESCC-F120 | exonic          | <i>GOLGB1</i>                                                                                                                               | nonsynonymous SNV      | NM_001256488:c.C3334T:p.R1112C           |                                | chr3  | 121415796 | 121415796 | G   | A  |
| ESCC-F120 | exonic          | <i>JGSF10</i>                                                                                                                               | nonsynonymous SNV      | NM_178822:c.T1141C:p.Y381H               |                                | chr3  | 151166628 | 151166628 | A   | G  |
| ESCC-F120 | exonic          | <i>BCL6</i>                                                                                                                                 | nonsynonymous SNV      | NM_001134738:c.G1301A:p.S434N            |                                | chr3  | 187446892 | 187446892 | C   | T  |
| ESCC-F120 | exonic          | <i>MUC4</i>                                                                                                                                 | nonsynonymous SNV      | NM_018406:c.C1037T:p.P346L               |                                | chr3  | 195517414 | 195517414 | G   | A  |
| ESCC-F120 | exonic          | <i>CNOT6L</i>                                                                                                                               | nonsynonymous SNV      | NM_144571:c.G1559A:p.C520Y               |                                | chr4  | 78641694  | 78641694  | C   | T  |
| ESCC-F120 | exonic          | <i>TRPC3</i>                                                                                                                                | nonsynonymous SNV      | NM_003305:c.C500T:p.A167V                |                                | chr4  | 122853694 | 122853694 | G   | A  |
| ESCC-F120 | exonic          | <i>FAT2</i>                                                                                                                                 | nonsynonymous SNV      | NM_005245:c.G12304A:p.G4102R             |                                | chr4  | 187518900 | 187518900 | C   | T  |
| ESCC-F120 | exonic          | <i>DNAH5</i>                                                                                                                                | nonsynonymous SNV      | NM_001369:c.T7000C:p.W2334R              |                                | chr5  | 13814944  | 13814944  | A   | G  |
| ESCC-F120 | exonic          | <i>DROSHA</i>                                                                                                                               | nonsynonymous SNV      | NM_001100412:c.G3926A:p.R1309Q           |                                | chr5  | 31401627  | 31401627  | C   | T  |
| ESCC-F120 | exonic          | <i>FAM169A</i>                                                                                                                              | nonsynonymous SNV      | NM_015566:c.G1888A:p.E630K               |                                | chr5  | 74077410  | 74077410  | C   | T  |
| ESCC-F120 | exonic          | <i>GPR98</i>                                                                                                                                | nonsynonymous SNV      | NM_032119:c.A11955G:p.L3985M             |                                | chr5  | 90055240  | 90055240  | A   | G  |
| ESCC-F120 | exonic          | <i>C6</i>                                                                                                                                   | frameshift insertion   | NM_000065:c.1630_1631insGT:p.Q544fs      |                                | chr5  | 41160298  | 41160298  | -   | AC |
| ESCC-F120 | exonic          | <i>CWC27</i>                                                                                                                                | frameshift deletion    | NM_005869:c.995delA:p.Q332fs             |                                | chr5  | 64181326  | 64181326  | A   | -  |
| ESCC-F120 | exonic          | <i>FAT2</i>                                                                                                                                 | nonsynonymous SNV      | NM_001447:c.C1611A:p.D537A               |                                | chr5  | 150946882 | 150946882 | G   | T  |
| ESCC-F120 | exonic          | <i>NPML</i>                                                                                                                                 | nonsynonymous SNV      | NM_001037738:c.C557T:p.A186V             |                                | chr5  | 170827189 | 170827189 | C   | T  |
| ESCC-F120 | exonic          | <i>GRK2</i>                                                                                                                                 | nonsynonymous SNV      | NM_001166247:c.G1988A:p.R665H            |                                | chr6  | 102376410 | 102376410 | G   | A  |
| ESCC-F120 | exonic          | <i>PCLO</i>                                                                                                                                 | nonsynonymous SNV      | NM_014510:c.T3539C:p.L1180P              |                                | chr7  | 82595565  | 82595565  | A   | G  |
| ESCC-F120 | exonic          | <i>PCLO</i>                                                                                                                                 | frameshift deletion    | NM_014510:c.3635delA:p.R1212fs           |                                | chr7  | 82595469  | 82595469  | T   | -  |



|           |        |                 |                      |                                         |         |      |           |           |    |   |
|-----------|--------|-----------------|----------------------|-----------------------------------------|---------|------|-----------|-----------|----|---|
| ESCC-F120 | exonic | <i>MLL3</i>     | frameshift deletion  | NM_170606:c.13488delT:p.F4496fs         | 1433829 | chr7 | 151845524 | 151845524 | A  | - |
| ESCC-F120 | exonic | <i>ATAD2</i>    | nonsynonymous SNV    | NM_014109:c.C463T:p.R155C               |         | chr8 | 124383983 | 124383983 | G  | A |
| ESCC-F120 | exonic | <i>ATAD2</i>    | frameshift insertion | NM_014109:c.355_356insA:p.E119fs        |         | chr8 | 124384892 | 124384892 | -  | T |
| ESCC-F120 | exonic | <i>KIAA1429</i> | stopgain SNV         | NM_015496:c.1562delT:p.L521X            |         | chr8 | 95538910  | 95538910  | A  | - |
| ESCC-F120 | exonic | <i>HUWE1</i>    | frameshift deletion  | NM_031407:c.8105_8106del:p.2702_2702del |         | chrX | 53585670  | 53585671  | TG | - |

| Color types                                                                                       | Number       |
|---------------------------------------------------------------------------------------------------|--------------|
| Validated as a true call by Sanger sequencing                                                     | 100          |
| Germline SNP                                                                                      | 2            |
| Validated as a false call by Sanger sequencing                                                    | 2            |
| <b>Total events</b>                                                                               | <b>104</b>   |
| <b>True positive rate</b>                                                                         | <b>96.2%</b> |
| PCR failure: high GC content; difficulty in designing primers; poor signal from Sanger sequencing | 15           |

**Supplementary Table 7. Focal recurrent SCNVs summarized from different studies of ESCC genome**

| Genomic Alterations             | Cytoband     | Studies of ESCC genomic changes (Number of Cases) |                             |                                          |                                                  |                                                    | Overall Frequency (n = 184) | Driver Genes in peak                 |
|---------------------------------|--------------|---------------------------------------------------|-----------------------------|------------------------------------------|--------------------------------------------------|----------------------------------------------------|-----------------------------|--------------------------------------|
|                                 |              | In-house SNP-array (n = 22)                       | In-house array-CGH (n = 59) | TumorScape <sup>7</sup> SNP-array (n=44) | Hu <i>et al.</i> <sup>8</sup> SNP-array (n = 30) | Bass <i>et al.</i> <sup>9</sup> SNP-array (n = 29) |                             |                                      |
|                                 | 8p11.23      | 3                                                 | 3                           | 5                                        | 2                                                | 2                                                  | 11.0%                       | <i>FGFR1</i> *                       |
|                                 | 8q24.21      | 1                                                 | 4                           | 7                                        | 4                                                | 0                                                  | 8.7%                        | <i>MYC</i>                           |
|                                 | 7p11.2       | 2                                                 | 3                           | 10                                       | 1                                                | 4                                                  | 10.9%                       | <i>EGFR</i>                          |
| <b>High Level Amplification</b> | 11q13.2-13.3 | 10                                                | 27                          | 20                                       | 14                                               | 14                                                 | 46.2%                       | <i>CCND1, FGF3/4/19, CTTN, CPT1A</i> |
|                                 | 12p12.1      | 2                                                 | 1                           | 4                                        | 2                                                | 1                                                  | 5.4%                        | <i>KRAS</i>                          |
|                                 | 12q15        | 1                                                 | 5                           | 1                                        | 0                                                | 0                                                  | 3.8%                        | <i>MDM2</i>                          |
|                                 | 3q26         | 1                                                 | 1                           | 10                                       | 0                                                | 0                                                  | 6.5%                        | <i>P63</i>                           |
|                                 | 3q26.32-33   | 0                                                 | 2                           | 13                                       | 1                                                | 2                                                  | 9.8%                        | <i>SOX2,PIK3CA</i>                   |
|                                 | 14q13.3      | 0                                                 | 3                           | 8                                        | 1                                                | 1                                                  | 7.1%                        | <i>NKX2-1</i>                        |
| <b>Homozygous Deletion</b>      | 2q22.1-22.2  | 0                                                 | 0                           | 8                                        | 0                                                | 3                                                  | 6.0%                        | <i>LRP1B</i>                         |
|                                 | 9p21.3       | 2                                                 | 11                          | 24                                       | 9                                                | 15                                                 | 33.2%                       | <i>CDKN2A/B</i>                      |
|                                 | 5q12.1       | 0                                                 | 1                           | 4                                        | 0                                                | 1                                                  | 3.3%                        | <i>PDE4D</i>                         |
|                                 | 9p24.1       | 0                                                 | 1                           | 3                                        | 0                                                | 2                                                  | 3.3%                        | <i>PTPRD</i>                         |
|                                 | 3p14.2       | 0                                                 | 0                           | 7                                        | 1                                                | 0                                                  | 4.3%                        | <i>FHIT</i>                          |

\*, We also validated *FGFR1* amplification by FISH in 53 additional ESCC tumors, and found that *FGFR1* was amplified in 11 samples.

Supplementary Table 8a. Correlation of FGFR1 protein expression and ESCC clinic-pathological parameters (68 analyzable cases, Additional Cohort)

| Variables            | FGFR1     |                | Total |
|----------------------|-----------|----------------|-------|
|                      | Unchanged | Over-expressed |       |
| Age                  |           |                |       |
| ≤60 years            | 26        | 6              | 32    |
| >60 years            | 30        | 6              | 36    |
| <i>P</i> = 0.822     |           |                |       |
| Gender               |           |                |       |
| Male                 | 38        | 8              | 46    |
| Female               | 18        | 4              | 22    |
| <i>P</i> = 0.936     |           |                |       |
| Primary tumor        |           |                |       |
| T1                   | 3         | 1              | 4     |
| T2                   | 53        | 11             | 64    |
| <i>P</i> = 0.691     |           |                |       |
| Regional lymph nodes |           |                |       |
| N0                   | 35        | 8              | 43    |
| N1                   | 21        | 4              | 25    |
| <i>P</i> = 0.786     |           |                |       |
| Grade                |           |                |       |
| G1                   | 20        | 3              | 23    |
| G2                   | 32        | 8              | 40    |
| G3                   | 4         | 1              | 5     |
| <i>P</i> = 0.776     |           |                |       |

Supplementary Table 8b. Correlation of FBWX7 protein expression and ESCC clinic-pathological parameters (39 analyzable cases, Additional Cohort)

| Variables            | FBWX7          |           | Total |
|----------------------|----------------|-----------|-------|
|                      | Down-regulated | Unchanged |       |
| Age                  |                |           |       |
| ≤60 years            | 2              | 11        | 13    |
| >60 years            | 10             | 16        | 26    |
| <i>P</i> = 0.141     |                |           |       |
| Gender               |                |           |       |
| Male                 | 7              | 10        | 17    |
| Female               | 5              | 17        | 22    |
| <i>P</i> = 0.216     |                |           |       |
| Primary tumor        |                |           |       |
| T2                   | 6              | 13        | 19    |
| T3                   | 6              | 14        | 20    |
| <i>P</i> = 0.915     |                |           |       |
| Regional lymph nodes |                |           |       |
| N0                   | 5              | 15        | 20    |
| N1                   | 5              | 11        | 16    |
| <i>P</i> = 0.677     |                |           |       |
| Grade                |                |           |       |
| G1                   | 6              | 8         | 14    |
| G2                   | 4              | 14        | 18    |
| G3                   | 2              | 5         | 7     |
| <i>P</i> = 0.451     |                |           |       |

Supplementary Table 8c. Correlation of ZNF750 protein expression and ESCC clinic-pathological parameters (48 analyzable cases, Additional Cohort)

| Variables            | ZNF750           |           | Total |
|----------------------|------------------|-----------|-------|
|                      | Down-regulated   | Unchanged |       |
| Age                  |                  |           |       |
| ≤60 years            | 12               | 2         | 14    |
| >60 years            | 24               | 10        | 34    |
|                      | <i>P</i> = 0.271 |           |       |
| Gender               |                  |           |       |
| Male                 | 16               | 4         | 20    |
| Female               | 20               | 8         | 28    |
|                      | <i>P</i> = 0.499 |           |       |
| Primary tumor        |                  |           |       |
| T2                   | 16               | 8         | 24    |
| T3                   | 20               | 4         | 24    |
|                      | <i>P</i> = 0.302 |           |       |
| Regional lymph nodes |                  |           |       |
| N0                   | 19               | 6         | 25    |
| N1                   | 15               | 5         | 20    |
|                      | <i>P</i> = 0.938 |           |       |
| Grade                |                  |           |       |
| G1                   | 10               | 5         | 15    |
| G2                   | 19               | 7         | 26    |
| G3                   | 7                | 0         | 7     |
|                      | <i>P</i> = 0.230 |           |       |

Supplementary Table 8d. Correlation of XPO1 protein expression and ESCC clinic-pathological parameters (92 analyzable cases, Additional Cohort)

| Variables            | XPO1             |                |    | Total |
|----------------------|------------------|----------------|----|-------|
|                      | Unchanged        | Over-expressed |    |       |
|                      | -                | +              | ++ |       |
| Age                  |                  |                |    |       |
| ≤60 years            | 20               | 6              | 5  | 31    |
| >60 years            | 28               | 26             | 7  | 61    |
|                      | <i>P</i> = 0.081 |                |    |       |
| Gender               |                  |                |    |       |
| Male                 | 32               | 14             | 7  | 53    |
| Female               | 16               | 18             | 5  | 39    |
|                      | <i>P</i> = 0.127 |                |    |       |
| Primary tumor        |                  |                |    |       |
| T1                   | 3                | 0              | 1  | 4     |
| T2                   | 40               | 24             | 5  | 69    |
| T3                   | 5                | 8              | 6  | 19    |
|                      | <i>P</i> = 0.016 |                |    |       |
| Regional lymph nodes |                  |                |    |       |
| N0                   | 31               | 18             | 8  | 57    |
| N1                   | 17               | 13             | 3  | 33    |
|                      | <i>P</i> = 0.663 |                |    |       |
| Grade                |                  |                |    |       |
| G1                   | 19               | 11             | 4  | 34    |
| G2                   | 21               | 19             | 7  | 47    |
| G3                   | 8                | 2              | 1  | 11    |
|                      | <i>P</i> = 0.534 |                |    |       |

*P* value is calculated with Pearson Chi-Square analysis

Supplementary Table 8e. Down-regulation of FAT1 protein expression in ESCC tumors

| FAT1 protein | Down-regulated | Total paired | Frequency |
|--------------|----------------|--------------|-----------|
| cases        | 6              | 18           | 33%       |

**Supplementary Table 9a. KEGG Pathway Enrichment Analysis**

| Pathway                                                | Number of genes observed | Entrez ID (Seperated by space)                                                              | Genome Hits | Observed Hits | Expected Hits | Enrichment Fold | P-value | Genome Background | Enrichment in GeneSet |
|--------------------------------------------------------|--------------------------|---------------------------------------------------------------------------------------------|-------------|---------------|---------------|-----------------|---------|-------------------|-----------------------|
| Gap junction                                           | 6                        | 2778 2911 3358 2767 114 1956                                                                | 90          | 6             | 2.27          | 2.64            | 0.0266  | 0.21%             | 0.55%                 |
| Hematopoietic cell lineage                             | 6                        | 7124 3575 3815 2322 7066 945                                                                | 88          | 6             | 2.22          | 2.7             | 0.0241  | 0.20%             | 0.55%                 |
| Apoptosis                                              | 6                        | 7124 472 330 5294 7157 5290                                                                 | 87          | 6             | 2.2           | 2.73            | 0.023   | 0.20%             | 0.55%                 |
| Chemokine signaling pathway                            | 10                       | 5829 1445 114 729230 5908 5290 3717 3577 5294 157                                           | 189         | 10            | 4.77          | 2.1             | 0.0224  | 0.44%             | 0.92%                 |
| Vitamin digestion and absorption                       | 3                        | 8029 337 9227                                                                               | 24          | 3             | 0.61          | 4.95            | 0.0219  | 0.06%             | 0.28%                 |
| Nicotinate and nicotinamide metabolism                 | 3                        | 5167 4837 5169                                                                              | 24          | 3             | 0.61          | 4.95            | 0.0219  | 0.06%             | 0.28%                 |
| Olfactory transduction                                 | 17                       | 219986 390892 81697 391192 391194 119694 346525 157 127385 4992 390649 122742 119678 3902   | 388         | 17            | 9.8           | 1.74            | 0.0209  | 0.90%             | 1.56%                 |
| Hepatitis C                                            | 8                        | 7124 5600 3716 1432 5294 1956 7157 5290                                                     | 134         | 8             | 3.38          | 2.36            | 0.0208  | 0.31%             | 0.73%                 |
| Pyruvate metabolism                                    | 4                        | 5161 5315 134526 10873                                                                      | 40          | 4             | 1.01          | 3.96            | 0.018   | 0.09%             | 0.37%                 |
| Cytokine-cytokine receptor interaction                 | 13                       | 7124 3575 91 3791 2321 729230 51330 29949 4233 2322 3815 3577 1956                          | 265         | 13            | 6.69          | 1.94            | 0.018   | 0.61%             | 1.19%                 |
| Ribosome biogenesis in eukaryotes                      | 6                        | 22803 7514 29102 55272 51068 84135                                                          | 80          | 6             | 2.02          | 2.97            | 0.0158  | 0.19%             | 0.55%                 |
| Fc epsilon RI signaling pathway                        | 6                        | 7124 5600 1432 6416 5294 5290                                                               | 79          | 6             | 1.99          | 3.01            | 0.0149  | 0.18%             | 0.55%                 |
| GnRH signaling pathway                                 | 7                        | 2778 5600 1432 6416 2767 114 1956                                                           | 101         | 7             | 2.55          | 2.74            | 0.0142  | 0.23%             | 0.64%                 |
| Starch and sucrose metabolism                          | 5                        | 283209 8972 5167 5169 6476                                                                  | 54          | 5             | 1.36          | 3.67            | 0.0116  | 0.12%             | 0.46%                 |
| Gastric acid secretion                                 | 6                        | 2778 115111 760 114 3274 389015                                                             | 74          | 6             | 1.87          | 3.21            | 0.0111  | 0.17%             | 0.55%                 |
| Bile secretion                                         | 6                        | 2778 6579 5244 760 114 5243                                                                 | 71          | 6             | 1.79          | 3.35            | 0.0091  | 0.16%             | 0.55%                 |
| Metabolic pathways                                     | 42                       | 33 127 4837 1788 10873 1573 6476 586 2131 8867 84920 1607 4249 1786 64087 5169 85465 7941 1 | 1130        | 42            | 28.53         | 1.47            | 0.009   | 2.62%             | 3.86%                 |
| Insulin signaling pathway                              | 9                        | 23624 7248 2475 9322 868 5257 5290 5140 5294                                                | 138         | 9             | 3.48          | 2.58            | 0.0086  | 0.32%             | 0.83%                 |
| Complement and coagulation cascades                    | 6                        | 718 728 2157 729 730 2                                                                      | 69          | 6             | 1.74          | 3.44            | 0.0079  | 0.16%             | 0.55%                 |
| Pantothenate and CoA biosynthesis                      | 3                        | 586 5167 5169                                                                               | 16          | 3             | 0.4           | 7.43            | 0.007   | 0.04%             | 0.28%                 |
| Citrate cycle (TCA cycle)                              | 4                        | 5161 3417 6392 2271                                                                         | 30          | 4             | 0.76          | 5.28            | 0.0066  | 0.07%             | 0.37%                 |
| Osteoclast differentiation                             | 9                        | 7124 3716 4286 5290 10859 5600 1513 1432 5294                                               | 128         | 9             | 3.23          | 2.78            | 0.0053  | 0.30%             | 0.83%                 |
| Neurotrophin signaling pathway                         | 9                        | 1445 7157 5781 5908 5290 5600 1432 5294 27330                                               | 127         | 9             | 3.21          | 2.81            | 0.0051  | 0.29%             | 0.83%                 |
| Carbohydrate digestion and absorption                  | 5                        | 8972 3938 5294 6476 5290                                                                    | 44          | 5             | 1.11          | 4.5             | 0.0049  | 0.10%             | 0.46%                 |
| Colorectal cancer                                      | 6                        | 5900 324 5294 2956 7157 5290                                                                | 62          | 6             | 1.57          | 3.83            | 0.0047  | 0.14%             | 0.55%                 |
| Shigellosis                                            | 6                        | 5600 3059 1432 1445 7307 8945                                                               | 61          | 6             | 1.54          | 3.9             | 0.0044  | 0.14%             | 0.55%                 |
| Bladder cancer                                         | 5                        | 5925 999 1019 1956 7157                                                                     | 42          | 5             | 1.06          | 4.71            | 0.004   | 0.10%             | 0.46%                 |
| Phosphatidylinositol signaling system                  | 7                        | 1607 5728 8867 5294 5286 8395 5290                                                          | 78          | 7             | 1.97          | 3.55            | 0.0036  | 0.18%             | 0.64%                 |
| NOD-like receptor signaling pathway                    | 6                        | 7124 5600 330 22861 1432 58484                                                              | 58          | 6             | 1.46          | 4.1             | 0.0034  | 0.13%             | 0.55%                 |
| Acute myeloid leukemia                                 | 6                        | 2475 3815 2322 5294 5371 5290                                                               | 57          | 6             | 1.44          | 4.17            | 0.0031  | 0.13%             | 0.55%                 |
| Inositol phosphate metabolism                          | 6                        | 5728 8867 5294 5286 8395 5290                                                               | 57          | 6             | 1.44          | 4.17            | 0.0031  | 0.13%             | 0.55%                 |
| Arrhythmogenic right ventricular cardiomyopathy (ARVC) | 7                        | 3908 29119 1756 1832 3679 781 6546                                                          | 74          | 7             | 1.87          | 3.75            | 0.0027  | 0.17%             | 0.64%                 |
| Non-small cell lung cancer                             | 6                        | 5925 1019 5294 1956 7157 5290                                                               | 54          | 6             | 1.36          | 4.4             | 0.0024  | 0.12%             | 0.55%                 |
| Leishmaniasis                                          | 7                        | 7124 718 3717 5600 3716 3111 1432                                                           | 72          | 7             | 1.82          | 3.85            | 0.0023  | 0.17%             | 0.64%                 |
| mTOR signaling pathway                                 | 6                        | 7248 253260 2475 5294 27330 5290                                                            | 52          | 6             | 1.31          | 4.57            | 0.0019  | 0.12%             | 0.55%                 |
| Long-term potentiation                                 | 7                        | 2911 2033 1387 2891 114 27330 5908                                                          | 70          | 7             | 1.77          | 3.96            | 0.0019  | 0.16%             | 0.64%                 |
| p53 signaling pathway                                  | 7                        | 6241 472 575 11200 5728 1019 7157                                                           | 68          | 7             | 1.72          | 4.08            | 0.0016  | 0.16%             | 0.64%                 |
| RNA transport                                          | 11                       | 7175 5042 23225 7514 9984 57510 60528 51068 3837 8667 8661                                  | 151         | 11            | 3.81          | 2.88            | 0.0016  | 0.35%             | 1.01%                 |
| Spliceosome                                            | 10                       | 25766 58517 9879 9984 7307 23451 51340 1655 11325 10291                                     | 127         | 10            | 3.21          | 3.12            | 0.0015  | 0.29%             | 0.92%                 |
| Progesterone-mediated oocyte maturation                | 8                        | 51433 114 5290 5600 5140 1432 5294 27330                                                    | 86          | 8             | 2.17          | 3.68            | 0.0015  | 0.20%             | 0.73%                 |
| Hypertrophic cardiomyopathy (HCM)                      | 8                        | 7124 7273 1756 3679 4624 3908 6546 781                                                      | 83          | 8             | 2.1           | 3.82            | 0.0012  | 0.19%             | 0.73%                 |
| Notch signaling pathway                                | 6                        | 2033 1387 4851 9612 54567 4853                                                              | 47          | 6             | 1.19          | 5.06            | 0.0011  | 0.11%             | 0.55%                 |
| Regulation of actin cytoskeleton                       | 14                       | 3683 5829 2335 2263 1445 3679 8826 5290 324 10787 81624 5294 1956 8395                      | 213         | 14            | 5.38          | 2.6             | 0.0011  | 0.49%             | 1.29%                 |
| Toll-like receptor signaling pathway                   | 9                        | 7124 51284 5290 5600 1513 1432 54472 5294 6416                                              | 102         | 9             | 2.58          | 3.49            | 0.0011  | 0.24%             | 0.83%                 |
| Systemic lupus erythematosus                           | 11                       | 7124 718 8339 729 8359 3020 8338 3111 8969 730 440689                                       | 136         | 11            | 3.43          | 3.2             | 0.0007  | 0.31%             | 1.01%                 |
| VEGF signaling pathway                                 | 8                        | 4775 5829 3791 5290 5600 1432 5294 10725                                                    | 76          | 8             | 1.92          | 4.17            | 0.0007  | 0.18%             | 0.73%                 |
| Jak-STAT signaling pathway                             | 12                       | 2033 23624 1387 3716 3575 868 5781 5290 3717 29949 5294 8027                                | 155         | 12            | 3.91          | 3.07            | 0.0006  | 0.36%             | 1.10%                 |

|                                                            |           |                                                                                             |            |           |             |             |                 |              |              |
|------------------------------------------------------------|-----------|---------------------------------------------------------------------------------------------|------------|-----------|-------------|-------------|-----------------|--------------|--------------|
| Basal cell carcinoma                                       | 7         | 5727 324 8323 11211 7976 6608 7157                                                          | 55         | 7         | 1.39        | 5.04        | 0.0005          | 0.13%        | 0.64%        |
| <b>MAPK signaling pathway</b>                              | <b>17</b> | <b>7124 2318 9175 4763 777 7157 5908 25780 1432 1956 2263 5600 774 6416 781 4208 27330</b>  | <b>268</b> | <b>17</b> | <b>6.77</b> | <b>2.51</b> | <b>0.0005</b>   | <b>0.62%</b> | <b>1.56%</b> |
| Chronic myeloid leukemia                                   | 8         | 23624 5925 1019 7157 868 5781 5290 5294                                                     | 73         | 8         | 1.84        | 4.34        | 0.0005          | 0.17%        | 0.73%        |
| Tight junction                                             | 11        | 4301 4622 57530 154810 3059 29119 5728 1019 4626 22989 4624                                 | 132        | 11        | 3.33        | 3.3         | 0.0005          | 0.31%        | 1.01%        |
| Amyotrophic lateral sclerosis (ALS)                        | 7         | 7124 4741 5600 2891 1432 7157 6506                                                          | 53         | 7         | 1.34        | 5.23        | 0.0004          | 0.12%        | 0.64%        |
| Viral myocarditis                                          | 8         | 4622 3683 1756 4626 22989 4624 3908 3111                                                    | 70         | 8         | 1.77        | 4.53        | 0.0004          | 0.16%        | 0.73%        |
| <b>ErbB signaling pathway</b>                              | <b>9</b>  | <b>23624 10718 2475 2066 6416 5294 1956 868 5290</b>                                        | <b>87</b>  | <b>9</b>  | <b>2.2</b>  | <b>4.1</b>  | <b>0.0004</b>   | <b>0.20%</b> | <b>0.83%</b> |
| Chagas disease (American trypanosomiasis)                  | 10        | 7124 2778 718 2775 5290 5600 1432 2767 5294 6416                                            | 104        | 10        | 2.63        | 3.81        | 0.0003          | 0.24%        | 0.92%        |
| Dorso-ventral axis formation                               | 5         | 4851 440822 4853 1956 56776                                                                 | 24         | 5         | 0.61        | 8.25        | 0.0003          | 0.06%        | 0.46%        |
| Glioma                                                     | 8         | 5925 2475 5728 1019 7157 5290 5294 1956                                                     | 65         | 8         | 1.64        | 4.87        | 0.0002          | 0.15%        | 0.73%        |
| Type II diabetes mellitus                                  | 7         | 7124 774 5315 2475 777 5294 5290                                                            | 48         | 7         | 1.21        | 5.78        | 0.0002          | 0.11%        | 0.64%        |
| Leukocyte transendothelial migration                       | 11        | 4301 3683 5829 29119 5781 5908 5290 1500 5600 1432 5294                                     | 116        | 11        | 2.93        | 3.76        | 0.0002          | 0.27%        | 1.01%        |
| Ubiquitin mediated proteolysis                             | 12        | 23624 51433 330 10075 868 5371 55585 55294 4591 63893 4734 8945                             | 135        | 12        | 3.41        | 3.52        | 0.0002          | 0.31%        | 1.10%        |
| Epithelial cell signaling in Helicobacter pylori infection | 9         | 1445 5803 5781 5600 4233 1432 3577 6416 1956                                                | 68         | 9         | 1.72        | 5.24        | 5.23E-05        | 0.16%        | 0.83%        |
| Dilated cardiomyopathy                                     | 10        | 7124 2778 7273 1756 3679 114 4624 3908 781 6546                                             | 90         | 10        | 2.27        | 4.4         | 9.32E-05        | 0.21%        | 0.92%        |
| Neuroactive ligand-receptor interaction                    | 19        | 3351 3358 2898 4829 2566 728 116443 2913 2891 3274 2911 6865 4157 4158 83551 886 187 5731 1 | 272        | 19        | 6.87        | 2.77        | 7.31E-05        | 0.63%        | 1.74%        |
| Purine metabolism                                          | 14        | 5146 5167 9583 114 6241 4881 5315 318 5140 55811 11128 5425 5169 50940                      | 162        | 14        | 4.09        | 3.42        | 6.85E-05        | 0.38%        | 1.29%        |
| Wnt signaling pathway                                      | 13        | 2033 27123 1387 4775 11211 7976 90665 7157 324 57216 10725 8323 8945                        | 150        | 13        | 3.79        | 3.43        | 0.0001          | 0.35%        | 1.19%        |
| Calcium signaling pathway                                  | 15        | 2778 2911 6865 3358 777 114 5257 774 886 2767 2066 1956 3274 6546 5731                      | 177        | 15        | 4.47        | 3.36        | 4.79E-05        | 0.41%        | 1.38%        |
| Axon guidance                                              | 12        | 4775 57689 54910 6092 2043 5361 2051 4233 2047 10371 2045 10725                             | 129        | 12        | 3.26        | 3.68        | 0.0001          | 0.30%        | 1.10%        |
| Renal cell carcinoma                                       | 9         | 2033 1387 2034 5781 5908 2271 5290 4233 5294                                                | 70         | 9         | 1.77        | 5.09        | 6.60E-05        | 0.16%        | 0.83%        |
| Adherens junction                                          | 9         | 4301 2033 1387 29119 999 8826 1500 4233 1956                                                | 73         | 9         | 1.84        | 4.88        | 9.22E-05        | 0.17%        | 0.83%        |
| Endometrial cancer                                         | 8         | 29119 999 5728 7157 5290 324 5294 1956                                                      | 52         | 8         | 1.31        | 6.09        | 4.53E-05        | 0.12%        | 0.73%        |
| Melanogenesis                                              | 11        | 2778 2033 1387 4157 2775 114 11211 4286 7976 3815 8323                                      | 101        | 11        | 2.55        | 4.31        | 5.07E-05        | 0.23%        | 1.01%        |
| ECM-receptor interaction                                   | 10        | 3910 3909 2335 3679 1286 3913 63923 3908 1301 22798                                         | 85         | 10        | 2.15        | 4.66        | 5.71E-05        | 0.20%        | 0.92%        |
| T cell receptor signaling pathway                          | 11        | 7124 23624 1493 4775 1019 868 5290 5600 1432 5294 10725                                     | 108        | 11        | 2.73        | 4.03        | 9.38E-05        | 0.25%        | 1.01%        |
| Pancreatic cancer                                          | 9         | 5925 675 3716 1019 7157 5290 5900 5294 1956                                                 | 70         | 9         | 1.77        | 5.09        | 6.60E-05        | 0.16%        | 0.83%        |
| Endocytosis                                                | 17        | 3791 868 157 2066 8027 1956 4734 23624 2263 1213 2321 5371 163 4233 3815 3577 8395          | 201        | 17        | 5.08        | 3.35        | 1.58E-05        | 0.47%        | 1.56%        |
| <b>Cell cycle</b>                                          | <b>13</b> | <b>2033 1387 5925 51433 7465 4175 1019 5001 7157 472 701 11200 5934</b>                     | <b>124</b> | <b>13</b> | <b>3.13</b> | <b>4.15</b> | <b>1.63E-05</b> | <b>0.29%</b> | <b>1.19%</b> |
| Prostate cancer                                            | 11        | 2033 1387 5925 2475 2263 5728 7157 5290 6716 5294 1956                                      | 89         | 11        | 2.25        | 4.89        | 1.53E-05        | 0.21%        | 1.01%        |
| Melanoma                                                   | 10        | 5925 999 5728 1019 4286 7157 5290 4233 5294 1956                                            | 71         | 10        | 1.79        | 5.58        | 1.16E-05        | 0.16%        | 0.92%        |
| Bacterial invasion of epithelial cells                     | 11        | 23624 5829 2335 3059 29119 999 1213 868 5290 4233 5294                                      | 70         | 11        | 1.77        | 6.22        | 1.40E-06        | 0.16%        | 1.01%        |
| Toxoplasmosis                                              | 15        | 7124 3910 3909 330 3716 2775 5290 3913 3717 5600 3908 3111 1432 5294 22798                  | 132        | 15        | 3.33        | 4.5         | 1.35E-06        | 0.31%        | 1.38%        |
| ABC transporters                                           | 10        | 94160 21 340273 5243 215 5244 154664 10347 10350 10351                                      | 44         | 10        | 1.11        | 9           | 1.15E-07        | 0.10%        | 0.92%        |
| Amoebiasis                                                 | 15        | 7124 2778 3910 3909 2335 1286 5290 3913 4583 1301 3908 6318 2767 5294 22798                 | 106        | 15        | 2.68        | 5.6         | 7.49E-08        | 0.25%        | 1.38%        |
| Focal adhesion                                             | 21        | 2318 3910 5829 330 2335 1286 3791 5908 1301 3908 1956 22798 3909 5728 3679 2321 5290 3913 6 | 200        | 21        | 5.05        | 4.16        | 4.48E-08        | 0.46%        | 1.93%        |
| Small cell lung cancer                                     | 14        | 3910 5925 3909 330 2335 5728 1019 1286 7157 5290 3913 3908 5294 22798                       | 85         | 14        | 2.15        | 6.52        | 2.83E-08        | 0.20%        | 1.29%        |
| Pathways in cancer                                         | 41        | 2033 2335 2034 29119 2475 11211 7157 5900 324 2322 8323 1387 5925 3909 999 5728 4286 6608 5 | 326        | 41        | 8.23        | 4.98        | 3.71E-17        | 0.76%        | 3.76%        |

**Supplementary Table 9b. GO Pathway Enrichment Analysis**

| Biological process----chromatin modification----GO:0016568 |           |                        |                                                                                                   |
|------------------------------------------------------------|-----------|------------------------|---------------------------------------------------------------------------------------------------|
| C=428;O=49;E=25.51;R=1.92;rawP=8.22e-06;adjP=0.0013        |           |                        |                                                                                                   |
| Gene symbol                                                | Entrez ID | Ensembl Gene Stable ID | Gene description                                                                                  |
| <i>EP300</i>                                               | 2033      | ENSG00000100393        | E1A binding protein p300                                                                          |
| <i>DNMT3A</i>                                              | 1788      | ENSG00000119772        | DNA (cytosine-5-)-methyltransferase 3 alpha                                                       |
| <i>KDM6A</i>                                               | 7403      | ENSG00000147050        | lysine (K)-specific demethylase 6A                                                                |
| <i>UBN1</i>                                                | 29855     | ENSG00000118900        | ubiquitin 1                                                                                       |
| <i>ARID2</i>                                               | 196528    | ENSG00000189079        | AT rich interactive domain 2 (ARID, RFX-like)                                                     |
| <i>CENPI</i>                                               | 2491      | ENSG00000102384        | centromere protein 1                                                                              |
| <i>CHD1L</i>                                               | 9557      | ENSG00000131778        | chromodomain helicase DNA binding protein 1-like                                                  |
| <i>TP53</i>                                                | 7157      | ENSG00000141510        | tumor protein p53                                                                                 |
| <i>NPM1</i>                                                | 4869      | ENSG00000181163        | nucleophosmin (nucleolar phosphoprotein B23, numatrin)                                            |
| <i>RSF1</i>                                                | 51773     | ENSG00000048649        | remodeling and spacing factor 1                                                                   |
| <i>KDM2B</i>                                               | 84678     | ENSG00000089094        | lysine (K)-specific demethylase 2B                                                                |
| <i>RBL2</i>                                                | 5934      | ENSG00000103479        | retinoblastoma-like 2 (p130)                                                                      |
| <i>HIRA</i>                                                | 7290      | ENSG00000100084        | HIR histone cell cycle regulation defective homolog A (S. cerevisiae)                             |
| <i>HDAC9</i>                                               | 9734      | ENSG00000048052        | histone deacetylase 9                                                                             |
| <i>SMARCB1</i>                                             | 6598      | ENSG00000099956        | SWI/SNF related, matrix associated, actin dependent regulator of chromatin, subfamily b, member 1 |
| <i>CREBBP</i>                                              | 1387      | ENSG00000005339        | CREB binding protein                                                                              |
| <i>RB1</i>                                                 | 5925      | ENSG00000139687        | retinoblastoma 1                                                                                  |
| <i>SUV39H2</i>                                             | 79723     | ENSG00000152455        | suppressor of variegation 3-9 homolog 2 (Drosophila)                                              |
| <i>BCORL1</i>                                              | 63035     | ENSG00000085185        | BCL6 corepressor-like 1                                                                           |
| <i>HUWE1</i>                                               | 10075     | ENSG00000086758        | HECT, UBA and WWE domain containing 1, E3 ubiquitin protein ligase                                |
| <i>JAK2</i>                                                | 3717      | ENSG00000096968        | Janus kinase 2                                                                                    |
| <i>MLL</i>                                                 | 4297      | ENSG00000118058        | myeloid/lymphoid or mixed-lineage leukemia (trithorax homolog, Drosophila)                        |
| <i>AICDA</i>                                               | 57379     | ENSG00000111732        | activation-induced cytidine deaminase                                                             |
| <i>UHRF1</i>                                               | 29128     | ENSG00000034063        | ubiquitin-like with PHD and ring finger domains 1                                                 |
| <i>DNMT1</i>                                               | 1786      | ENSG00000130816        | DNA (cytosine-5-)-methyltransferase 1                                                             |
| <i>PAX5</i>                                                | 5079      | ENSG00000196092        | paired box 5                                                                                      |
| <i>TAF1L</i>                                               | 138474    | ENSG00000122728        | TAF1 RNA polymerase II, TATA box binding protein (TBP)-associated factor, 210kDa-like             |
| <i>MLL2</i>                                                | 8085      | ENSG00000167548        | myeloid/lymphoid or mixed-lineage leukemia 2                                                      |
| <i>WDR92</i>                                               | 116143    | ENSG00000243667        | WD repeat domain 92                                                                               |
| <i>TDIRD3</i>                                              | 81550     | ENSG00000083544        | tudor domain containing 3                                                                         |
| <i>SMARCA1</i>                                             | 6594      | ENSG00000102038        | SWI/SNF related, matrix associated, actin dependent regulator of chromatin, subfamily a, member 1 |
| <i>PBRM1</i>                                               | 55193     | ENSG00000163939        | polybromo 1                                                                                       |
| <i>ARID1A</i>                                              | 8289      | ENSG00000117713        | AT rich interactive domain 1A (SWI-like)                                                          |
| <i>MLL3</i>                                                | 58508     | ENSG00000055609        | myeloid/lymphoid or mixed-lineage leukemia 3                                                      |
| <i>BAP1</i>                                                | 8314      | ENSG00000163930        | BRCA1 associated protein-1 (ubiquitin carboxy-terminal hydrolase)                                 |
| <i>RERE</i>                                                | 473       | ENSG00000142599        | arginine-glutamic acid dipeptide (RE) repeats                                                     |
| <i>PHF17</i>                                               | 79960     | ENSG00000077684        | PHD finger protein 17                                                                             |
| <i>HSF4</i>                                                | 3299      | ENSG00000102878        | heat shock transcription factor 4                                                                 |
| <i>BAZ1A</i>                                               | 11177     | ENSG00000198604        | bromodomain adjacent to zinc finger domain, 1A                                                    |

|                |       |                 |                                                         |
|----------------|-------|-----------------|---------------------------------------------------------|
| <i>SRCAP</i>   | 10847 | ENSG00000080603 | Snf2-related CREBBP activator protein                   |
| <i>TET1</i>    | 80312 | ENSG00000138336 | tet methylcytosine dioxygenase 1                        |
| <i>ATXN7</i>   | 6314  | ENSG00000163635 | ataxin 7                                                |
| <i>BRCA2</i>   | 675   | ENSG00000139618 | breast cancer 2, early onset                            |
| <i>L3MBTL3</i> | 84456 | ENSG00000198945 | l(3)mbt-like 3 (Drosophila)                             |
| <i>PML</i>     | 5371  | ENSG00000140464 | promyelocytic leukemia                                  |
| <i>GTF3C4</i>  | 9329  | ENSG00000125484 | general transcription factor IIIC, polypeptide 4, 90kDa |
| <i>IKZF1</i>   | 10320 | ENSG00000185811 | IKAROS family zinc finger 1 (Ikaros)                    |
| <i>CBX4</i>    | 8535  | ENSG00000141582 | chromobox homolog 4                                     |
| <i>JARID2</i>  | 3720  | ENSG00000080883 | jumonji, AT rich interactive domain 2                   |

Due to the limitation of space, only GO:0016568 category was shown here. The first row lists its sub-root (biological process, molecular function, or cellular component), category name, and corresponding GO ID. The second row lists number of reference genes in the category (C), number of genes in the gene set and also in the category (O), expected number in the category (E), Ratio of enrichment (R), p value from hypergeometric test (rawP), and p value adjusted by the multiple test adjustment (adjP). Finally, genes in the category are listed. For each gene, the table lists the user uploaded ID and value (optional), Entrez ID, Ensembl Gene Stable ID, Gene symbol, and description. Ensembl Gene Stable ID and Entrez Gene ID are linked to the Ensembl and Entrez Gene databases, respectively.



**Supplementary Table 10. Potentially Actionable Targets in ESCC**

| Biology Class            | Actionable Gene | SCNV                   | Somatic Mutation       |                          | mRNA                  | Protein                  | Targeting molecules                         |
|--------------------------|-----------------|------------------------|------------------------|--------------------------|-----------------------|--------------------------|---------------------------------------------|
|                          |                 | Primary<br>n = 184 (%) | Primary<br>n = 139 (%) | Cell lines<br>n = 24 (%) | Primary<br>n = 70 (%) | Primary<br>Altered/Total |                                             |
| ERBB family              | EGFR            | 10.9                   | 0.7                    | 8.3                      | 10                    | 27/40 <sup>10</sup>      | Cetuximab, Erlotinib, Gefitinib [22]        |
|                          | HER-2           | 1.1                    |                        |                          |                       | 68/185 <sup>11</sup>     | Trastuzumab, Lapatinib, Neratinib, [12]     |
|                          | ERBB4           |                        | 4.3                    | 8.3                      |                       |                          | Pelitinib, BMS-599626                       |
| Other RTKs               | ALK             | 0.5                    | 2.1                    | 12.5                     |                       |                          | Crizotinib, LDK378, ASP3026                 |
|                          | KIT             |                        | 0.7                    | 8.3                      |                       |                          | Sorafenib, Sunitinib, Pazopanib [14]        |
|                          | FGFR1           | 11.0                   |                        |                          |                       | 14/81                    | Dovitinib, BGJ398, AZD4547 [6]              |
|                          | MET             | 1.1                    | 0.7                    | 12.5                     | 11.4                  |                          | ARQ197, MetMab [15]                         |
|                          | HGF             | 1.6                    |                        | 12.5                     |                       |                          | Rilotumumab, Ficlatazumab                   |
|                          | IL7R            | 6.0                    |                        |                          |                       |                          | CP-690550, INCB018424, CYT387               |
| JAK-Stat3 pathway        | JAK1            |                        | 1.3                    |                          |                       |                          | Ruxolitinib, AZD1480                        |
|                          | p-Stat3         |                        |                        |                          |                       | 48/130 <sup>12</sup>     |                                             |
| PI3K pathway             | PIK3CA          | 9.8                    | 7.2                    | 12.5                     | 21.4                  | 33/66 <sup>13</sup>      | BEZ235, BKM120, XL147 [8]                   |
|                          | PIK3C2A         |                        | 0.7                    |                          |                       |                          |                                             |
|                          | PIK3CG          | 1.6                    | 2.9                    | 4.2                      |                       |                          |                                             |
|                          | PIK3C2G         |                        |                        | 37.5                     |                       |                          |                                             |
| MTOR pathway             | RPS6KA1         | 0.5                    |                        |                          | 18.6                  |                          | Oncothyreon, Px-866                         |
|                          | MTOR            | 1.6                    |                        | 8.3                      |                       | 26/105 <sup>14</sup>     | Temsirolimus, Everolimus, Ridaforolimus [5] |
| HDAC family              | HDAC3           |                        |                        | 4.2                      |                       |                          | Vorinostat, Entinostat, Romidepsin [13]     |
|                          | HDAC6           | 0.5                    |                        | 8.3                      |                       |                          |                                             |
|                          | HDAC9           | 3.3                    | 1.4                    |                          |                       |                          |                                             |
| Nuclear Exportin         | XPO1            |                        | 0.7                    |                          | 32.9                  | 45/93                    | Leptomycin B, KPT-SINE, KOS-2464 [9]        |
| Homologous Recombination | BRCA1*          |                        |                        | 4.2                      |                       |                          | Iniparib, BSI-201, Olaparib [6]             |
|                          | BRCA2*          |                        | 3.9                    | 0.7                      | 16.7                  |                          |                                             |
| Apoptosis                | BIRC3           | 5.5                    |                        |                          |                       |                          | LCL-161, GDC-0917, AT-406 [5]               |
| Others                   | MAGEC1          |                        | 2.9                    | 0.7                      |                       |                          | MAGE Vaccines                               |
|                          | MAGEC3          |                        | 2.2                    |                          |                       |                          |                                             |
|                          | TP53            |                        | 33.8                   | 25.9                     | 50                    | 33.3                     | Ad-p53, Ad-p53-dendritic cells, CDB3, [17]  |
|                          | CTSK            | 0.5                    | 0.7                    |                          |                       | 48.6                     | Balicatib, Odanacatib                       |
|                          | FN1             |                        | 2.9                    |                          | 12.5                  | 52.9                     | 1311-L19SIP                                 |

**Amplification**   **Missense/In-Frame**   **Truncating**   **Overexpression**

Due to the limitation of space, the total number of targeting molecules currently available for each gene was shown in brackets. Somatic mutations in cancer cell lines were summarized using both in-house data (Supplementary Table 11) and CCLE data (see URL). mRNA changes were calculated from both GSE23400 (n = 53) and GSE20347 (n = 17) datasets, and only identical changes in both studies are shown (p < 0.01, fold change > 2, see also Supplementary Table 12). See <http://clinicaltrials.gov/> and these studies<sup>15,16</sup> for detailed information regarding targeting molecules. \*, synthetic lethal with PARP inhibitors.

**Supplementary Table 11. Summary of probable somatic mutations in ESCC cell lines**

| Cell line | Mutation location | Gene Name | Mutation type           | Amino Acid Change                                 | Cosmic V58 Match Position | Chr   | Start position | End position | Refrence base | Observed base | Variant allele frequency (VAF) | strand ratio | Total depth | Variant depth |
|-----------|-------------------|-----------|-------------------------|---------------------------------------------------|---------------------------|-------|----------------|--------------|---------------|---------------|--------------------------------|--------------|-------------|---------------|
| YES2      | exonic            | MUC4      | nonsynonymous SNV       | NM_018406:c.C8282T;p.A2761V                       |                           | chr3  | 195510169      | 195510169    | G             | A             | 0.080808081                    | 0.95         | 495         | 40            |
| YES2      | exonic            | MUC4      | nonsynonymous SNV       | NM_018406:c.C8800T;p.L2934F                       |                           | chr3  | 195509651      | 195509651    | G             | A             | 0.081174439                    | 0.72         | 579         | 47            |
| YES2      | exonic            | MUC4      | nonsynonymous SNV       | NM_018406:c.C3317A;p.P1106H                       |                           | chr3  | 195515134      | 195515134    | G             | T             | 0.083950617                    | 0.53         | 405         | 34            |
| YES2      | exonic            | MUC4      | nonsynonymous SNV       | NM_018406:c.C8734A;p.P2912T                       |                           | chr3  | 195509717      | 195509717    | G             | T             | 0.085427136                    | 0.43         | 597         | 51            |
| YES2      | exonic            | MUC4      | nonsynonymous SNV       | NM_018406:c.G4936A;p.A1646T                       | 1645683                   | chr3  | 195513515      | 195513515    | C             | T             | 0.088315217                    | 0.86         | 736         | 65            |
| YES2      | exonic            | MUC2      | nonsynonymous SNV       | NM_002457:c.T4747A;p.S1583T                       |                           | chr11 | 1092928        | 1092928      | T             | A             | 0.088888889                    | 0.64         | 315         | 28            |
| YES2      | exonic            | DSPP      | nonsynonymous SNV       | NM_014208:c.C2657G;p.N886S                        |                           | chr4  | 88536471       | 88536471     | A             | G             | 0.090909091                    | 0.86         | 77          | 7             |
| YES2      | exonic            | MUC4      | nonsynonymous SNV       | NM_018406:c.C3399G;p.H1133Q                       |                           | chr3  | 195515052      | 195515052    | G             | C             | 0.094117647                    | 0.13         | 170         | 16            |
| YES2      | exonic            | EPPK1     | nonsynonymous SNV       | NM_031308:c.G7105A;p.D2369N                       |                           | chr8  | 144940317      | 144940317    | C             | T             | 0.097484277                    | 0.68         | 318         | 31            |
| YES2      | exonic            | MUC2      | nonsynonymous SNV       | NM_002457:c.C4679T;p.T1560M                       |                           | chr11 | 1092860        | 1092860      | C             | T             | 0.102040816                    | 0.94         | 343         | 35            |
| YES2      | exonic            | GPR112    | nonsynonymous SNV       | NM_153834:c.G3529A;p.V1177I                       |                           | chrX  | 135429394      | 135429394    | G             | A             | 0.106382979                    | 0.20         | 94          | 10            |
| YES2      | exonic            | EPPK1     | nonsynonymous SNV       | NM_031308:c.G7144A;p.D2382N                       |                           | chr8  | 144940278      | 144940278    | C             | T             | 0.109803922                    | 0.86         | 255         | 28            |
| YES2      | exonic            | MUC6      | nonsynonymous SNV       | NM_005961:c.C4889T;p.T1630I                       |                           | chr11 | 1017912        | 1017912      | G             | A             | 0.118705036                    | 0.42         | 278         | 33            |
| YES2      | exonic            | MUC4      | nonsynonymous SNV       | NM_018406:c.C11258T;p.A3753V                      |                           | chr3  | 195507193      | 195507193    | G             | A             | 0.11965812                     | 0.33         | 351         | 42            |
| YES2      | exonic            | MUC4      | nonsynonymous SNV       | NM_018406:c.G8775C;p.Q2925H                       | 1645684                   | chr3  | 195509676      | 195509676    | C             | G             | 0.120147874                    | 0.65         | 541         | 65            |
| YES2      | exonic            | PASD1     | nonsynonymous SNV       | NM_173493:c.C449T;p.S150F                         |                           | chrX  | 150791439      | 150791439    | C             | T             | 0.120481928                    | 0.90         | 83          | 10            |
| YES2      | exonic            | ZNF717    | nonsynonymous SNV       | NM_001128223:c.A1952T;p.E651V                     | 1558609                   | chr3  | 75786822       | 75786822     | T             | A             | 0.12195122                     | 0.70         | 82          | 10            |
| YES2      | exonic            | OTOA      | stopgain SNV            | NM_170664:c.G1387T;p.E463X                        |                           | chr16 | 21747639       | 21747639     | G             | T             | 0.129032258                    | 0.95         | 155         | 20            |
| YES2      | exonic            | ZNF717    | nonsynonymous SNV       | NM_001128223:c.T2530A;p.C844S                     |                           | chr3  | 75786244       | 75786244     | A             | T             | 0.13015873                     | 0.46         | 315         | 41            |
| YES2      | exonic            | TNIK      | nonsynonymous SNV       | NM_001161561:c.A1595C;p.D532A                     |                           | chr3  | 170846594      | 170846594    | T             | G             | 0.132947977                    | 0.30         | 173         | 23            |
| YES2      | exonic            | CUBN      | nonsynonymous SNV       | NM_001081:c.A2870G;p.N957S                        |                           | chr10 | 17112021       | 17112021     | T             | C             | 0.138728324                    | 0.67         | 173         | 24            |
| YES2      | exonic            | MUC4      | nonsynonymous SNV       | NM_018406:c.A11464G;p.T3822A                      |                           | chr3  | 195506987      | 195506987    | T             | C             | 0.150684932                    | 0.91         | 73          | 11            |
| YES2      | exonic            | CMYA5     | nonframeshift deletion  | NM_153610:c.1662_1694del;p.554_565del             |                           | chr5  | 79026250       | 79026282     | AGAAGAAC      | -             | 0.170454545                    | 0.37         | 176         | 30            |
| YES2      | exonic            | MUC2      | nonsynonymous SNV       | NM_002457:c.A4678C;p.T1560P                       |                           | chr11 | 1092859        | 1092859      | A             | C             | 0.180379747                    | 0.79         | 316         | 57            |
| YES2      | exonic            | FILIPIL   | nonsynonymous SNV       | NM_014890:c.T1256C;p.L419P                        |                           | chr3  | 99568544       | 99568544     | A             | G             | 0.18597561                     | 0.61         | 328         | 61            |
| YES2      | exonic            | DSPP      | nonframeshift insertion | NM_014208:c.2643_2644insAGTAGTGAC;p.D881delinsDSS | 1474924                   | chr4  | 88536457       | 88536457     | -             | GTAGTGA       | 0.203703704                    | 0.50         | 108         | 22            |
| YES2      | exonic            | EXT1      | nonsynonymous SNV       | NM_000127:c.C1003A;p.L335M                        |                           | chr8  | 118849400      | 118849400    | G             | T             | 0.204633205                    | 0.43         | 259         | 53            |
| YES2      | exonic            | MUC4      | nonsynonymous SNV       | NM_018406:c.G11461C;p.D3821H                      |                           | chr3  | 195506990      | 195506990    | C             | G             | 0.208333333                    | 0.95         | 96          | 20            |
| YES2      | splicing          | SLC5A4    |                         |                                                   |                           | chr22 | 32651317       | 32651317     | G             | A             | 0.216666667                    | 0.23         | 60          | 13            |
| YES2      | exonic            | DSPP      | nonsynonymous SNV       | NM_014208:c.C3429A;p.D1143E                       | 1645685                   | chr4  | 88537243       | 88537243     | C             | A             | 0.219512195                    | 0.78         | 41          | 9             |
| YES2      | exonic            | FAM208B   | nonsynonymous SNV       | NM_017782:c.C5819T;p.T1940I                       |                           | chr10 | 5791203        | 5791203      | C             | T             | 0.224137931                    | 0.62         | 58          | 13            |
| YES2      | exonic            | MUC4      | nonsynonymous SNV       | NM_018406:c.A3037G;p.S1013G                       | 581;1645683;16            | chr3  | 195515414      | 195515414    | T             | C             | 0.241758242                    | 0.39         | 273         | 66            |
| YES2      | exonic            | COL12A1   | nonsynonymous SNV       | NM_080645:c.A3470G;p.K1157R                       |                           | chr6  | 75831142       | 75831142     | T             | C             | 0.267759563                    | 0.57         | 183         | 49            |
| YES2      | exonic            | LRRTM4    | nonsynonymous SNV       | NM_001134745:c.G1254T;p.E418D                     |                           | chr2  | 77745741       | 77745741     | C             | A             | 0.270114943                    | 0.47         | 174         | 47            |
| YES2      | exonic            | LRRTM4    | nonsynonymous SNV       | NM_001134745:c.C1255T;p.H419Y                     |                           | chr2  | 77745740       | 77745740     | G             | A             | 0.274853801                    | 0.47         | 171         | 47            |
| YES2      | exonic            | PCLO      | nonsynonymous SNV       | NM_014510:c.C13801A;p.H4601N                      |                           | chr7  | 82475913       | 82475913     | G             | T             | 0.295081967                    | 0.53         | 122         | 36            |
| YES2      | exonic            | TNRC6C    | nonsynonymous SNV       | NM_001142640:c.G3526A;p.G1176R                    |                           | chr17 | 76082641       | 76082641     | G             | A             | 0.316205534                    | 0.51         | 253         | 80            |
| YES2      | exonic            | IGSF10    | nonsynonymous SNV       | NM_178822:c.T2194G;p.S732A                        |                           | chr3  | 151165575      | 151165575    | A             | C             | 0.317073171                    | 0.58         | 164         | 52            |
| YES2      | exonic            | ZNF134    | nonsynonymous SNV       | NM_003435:c.T974A;p.F325Y                         |                           | chr19 | 58132461       | 58132461     | T             | A             | 0.330357143                    | 0.47         | 224         | 74            |
| YES2      | exonic            | SDHD      | nonsynonymous SNV       | NM_003002:c.C269A;p.A90E                          |                           | chr11 | 111959690      | 111959690    | C             | A             | 0.367088608                    | 0.48         | 158         | 58            |
| YES2      | exonic            | HNRNPUL1  | frameshift deletion     | NM_007040:c.1216_1219del;p.406_407del             |                           | chr19 | 41798366       | 41798369     | AGTG          | -             | 0.371428571                    | 0.42         | 70          | 26            |
| YES2      | exonic            | SYNE1     | nonsynonymous SNV       | NM_033071:c.T7532A;p.L2511H                       |                           | chr6  | 152717955      | 152717955    | A             | T             | 0.401408451                    | 0.54         | 142         | 57            |
| YES2      | exonic            | ZNF34     | nonsynonymous SNV       | NM_030580:c.A717T;p.K239N                         |                           | chr8  | 145999617      | 145999617    | T             | A             | 0.411764706                    | 0.86         | 17          | 7             |
| YES2      | exonic            | HEPHL1    | stopgain SNV            | NM_001098672:c.C364T;p.R122X                      |                           | chr11 | 93779032       | 93779032     | C             | T             | 0.41509434                     | 0.44         | 159         | 66            |
| YES2      | exonic            | JAK1      | frameshift deletion     | NM_002227:c.2745delA;p.G915fs                     |                           | chr1  | 65305383       | 65305383     | T             | -             | 0.43220339                     | 0.51         | 118         | 51            |
| YES2      | exonic            | EP300     | nonsynonymous SNV       | NM_001429:c.G4154T;p.C1385F                       | 542874;156055             | chr22 | 41564853       | 41564853     | G             | T             | 0.449152542                    | 0.49         | 118         | 53            |
| YES2      | exonic            | GPR112    | frameshift deletion     | NM_153834:c.3529_3530del;p.1177_1177del           |                           | chrX  | 135429394      | 135429395    | GT            | -             | 0.476744186                    | 0.48         | 172         | 82            |
| YES2      | exonic            | CRB1      | stopgain SNV            | NM_001193640:c.G2137T;p.E713X                     |                           | chr1  | 197396928      | 197396928    | G             | T             | 0.552795031                    | 0.55         | 161         | 89            |
| YES2      | exonic            | MUC2      | nonsynonymous SNV       | NM_002457:c.G4534A;p.A1512T                       |                           | chr11 | 1092715        | 1092715      | G             | A             | 0.581818182                    | 0.56         | 55          | 32            |
| YES2      | exonic            | SEC14L3   | nonsynonymous SNV       | NM_174975:c.C352G;p.Q118E                         |                           | chr22 | 30864566       | 30864566     | G             | C             | 0.606060606                    | 0.60         | 33          | 20            |
| YES2      | exonic            | MUC2      | nonsynonymous SNV       | NM_002457:c.C358T;p.P120S                         |                           | chr11 | 1077608        | 1077608      | C             | T             | 0.612903226                    | 0.79         | 31          | 19            |
| YES2      | exonic            | MUC4      | nonsynonymous SNV       | NM_018406:c.C11468T;p.T3823I                      |                           | chr3  | 195506983      | 195506983    | G             | A             | 0.78125                        | 0.44         | 64          | 50            |
| YES2      | exonic            | MUC4      | nonsynonymous SNV       | NM_018406:c.C11511G;p.H3837Q                      |                           | chr3  | 195506940      | 195506940    | G             | C             | 0.961538462                    | 0.72         | 26          | 25            |

|       |          |          |                      |                                         |               |       |           |           |          |   |             |      |     |     |
|-------|----------|----------|----------------------|-----------------------------------------|---------------|-------|-----------|-----------|----------|---|-------------|------|-----|-----|
| YES2  | exonic   | ADAM2    | nonsynonymous SNV    | NM_001464:c.G119T;p.G40V                |               | chr8  | 39694668  | 39694668  | C        | A | 1           | 0.63 | 104 | 104 |
| YES2  | exonic   | LAMB2    | nonsynonymous SNV    | NM_002292:c.C444T;p.R1482W              |               | chr3  | 49160266  | 49160266  | G        | A | 1           | 0.30 | 27  | 27  |
| YES2  | exonic   | MAF3K15  | stopgain SNV         | NM_001001671:c.A2365T;p.K789X           |               | chrX  | 19410186  | 19410186  | T        | A | 1           | 0.48 | 63  | 63  |
| YES2  | exonic   | NEFM     | nonsynonymous SNV    | NM_005382:c.C895A;p.L2991               |               | chr8  | 24772201  | 24772201  | C        | A | 1           | 0.26 | 34  | 34  |
| YES2  | exonic   | PCSK5    | nonsynonymous SNV    | NM_001190482:c.G5273T;p.G1758V          |               | chr9  | 78973528  | 78973528  | G        | T | 1           | 0.29 | 92  | 92  |
| YES2  | exonic   | SUFU     | stopgain SNV         | NM_001178133:c.C436T;p.R146X            |               | chr10 | 104309845 | 104309845 | C        | T | 1           | 0.13 | 16  | 16  |
| YES2  | exonic   | TP53     | stopgain SNV         | NM_001126115:c.G265T;p.E89X             | 9672;1363365; | chr17 | 7578188   | 7578188   | C        | A | 1           | 0.71 | 34  | 34  |
| YES2  | exonic   | TTN      | nonsynonymous SNV    | NM_133378:c.A13193G;p.E4398G            |               | chr2  | 179596677 | 179596677 | T        | C | 1           | 0.46 | 89  | 89  |
| YES2  | exonic   | UNC79    | nonsynonymous SNV    | NM_020818:c.G2260A;p.V754M              |               | chr14 | 94048678  | 94048678  | G        | A | 1           | 0.32 | 28  | 28  |
| EC109 | exonic   | SI       | stopgain SNV         | NM_001041:c.G2885A;p.W962X              |               | chr3  | 164748507 | 164748507 | C        | T | 0.080291971 | 0.36 | 137 | 11  |
| EC109 | exonic   | ATAD2    | nonsynonymous SNV    | NM_014109:c.T837A;p.D279E               |               | chr8  | 124382155 | 124382155 | A        | T | 0.081632653 | 0.88 | 98  | 8   |
| EC109 | exonic   | ZNF717   | nonsynonymous SNV    | NM_001128223:c.C1853T;p.P618L           |               | chr3  | 75786921  | 75786921  | G        | A | 0.081841432 | 0.34 | 391 | 32  |
| EC109 | exonic   | ADAM18   | nonsynonymous SNV    | NM_014237:c.G1086A;p.M362I              |               | chr8  | 39505902  | 39505902  | G        | A | 0.08411215  | 0.33 | 107 | 9   |
| EC109 | exonic   | MUC6     | nonsynonymous SNV    | NM_005961:c.C4889T;p.T1630I             |               | chr11 | 1017912   | 1017912   | G        | A | 0.089285714 | 0.50 | 224 | 20  |
| EC109 | exonic   | MUC6     | nonsynonymous SNV    | NM_005961:c.C5912T;p.P1971L             |               | chr11 | 1016889   | 1016889   | G        | A | 0.091269841 | 0.30 | 252 | 23  |
| EC109 | exonic   | GTF3C4   | nonsynonymous SNV    | NM_012204:c.G1498T;p.G500C              |               | chr9  | 135554504 | 135554504 | G        | T | 0.091428571 | 0.50 | 175 | 16  |
| EC109 | exonic   | GRM3     | frameshift insertion | NM_000840:c.2367_2368insA;p.F789fs      |               | chr7  | 86469197  | 86469197  | -        | A | 0.100840336 | 0.42 | 119 | 12  |
| EC109 | exonic   | MUC2     | nonsynonymous SNV    | NM_002457:c.C4703T;p.T1568M             |               | chr11 | 1092884   | 1092884   | C        | T | 0.101754386 | 0.59 | 285 | 29  |
| EC109 | exonic   | ATAD2    | nonsynonymous SNV    | NM_014109:c.A834T;p.E278D               |               | chr8  | 124382158 | 124382158 | T        | A | 0.104166667 | 0.80 | 96  | 10  |
| EC109 | exonic   | MUC2     | nonsynonymous SNV    | NM_002457:c.C5114T;p.T1705I             |               | chr11 | 1093295   | 1093295   | C        | T | 0.104477612 | 0.50 | 134 | 14  |
| EC109 | exonic   | MUC2     | nonsynonymous SNV    | NM_002457:c.C4634T;p.T1545M             |               | chr11 | 1092815   | 1092815   | C        | T | 0.109375    | 0.86 | 64  | 7   |
| EC109 | exonic   | ZNF717   | nonsynonymous SNV    | NM_001128223:c.G544A;p.V182I            |               | chr3  | 75788230  | 75788230  | C        | T | 0.110701107 | 0.33 | 271 | 30  |
| EC109 | exonic   | ZNF717   | nonsynonymous SNV    | NM_001128223:c.A629T;p.Q210L            |               | chr3  | 75788145  | 75788145  | T        | A | 0.119856887 | 0.37 | 559 | 67  |
| EC109 | exonic   | SEC22B   | unknown              | UNKNOWN                                 |               | chr1  | 145115815 | 145115815 | A        | C | 0.123966942 | 0.55 | 605 | 75  |
| EC109 | exonic   | MUC2     | nonsynonymous SNV    | NM_002457:c.C4679T;p.T1560M             |               | chr11 | 1092860   | 1092860   | C        | T | 0.125       | 0.87 | 240 | 30  |
| EC109 | exonic   | MED1     | frameshift deletion  | NM_004774:c.596_605del;p.199_202del     |               | chr17 | 37587412  | 37587421  | TATCCAAG | - | 0.136363636 | 0.38 | 154 | 21  |
| EC109 | exonic   | MUC2     | nonsynonymous SNV    | NM_002457:c.T474A;p.S1583T              |               | chr11 | 1092928   | 1092928   | T        | A | 0.137362637 | 0.56 | 182 | 25  |
| EC109 | exonic   | HYDIN    | nonsynonymous SNV    | NM_032821:c.G10831A;p.D3611N            |               | chr16 | 70908322  | 70908322  | C        | T | 0.138513514 | 0.56 | 296 | 41  |
| EC109 | exonic   | OR6Q1    | nonsynonymous SNV    | NM_001005186:c.C685A;p.L229M            |               | chr11 | 57799109  | 57799109  | C        | A | 0.146341463 | 0.83 | 41  | 6   |
| EC109 | exonic   | IPO9     | nonsynonymous SNV    | NM_018085:c.G2581C;p.V861L              |               | chr1  | 201841960 | 201841960 | G        | C | 0.149122807 | 0.59 | 114 | 17  |
| EC109 | exonic   | HYDIN    | nonsynonymous SNV    | NM_032821:c.C9943T;p.L3315F             |               | chr16 | 70917856  | 70917856  | G        | A | 0.155339806 | 0.63 | 206 | 32  |
| EC109 | splicing | CDH23    |                      |                                         |               | chr10 | 73537660  | 73537660  | T        | C | 0.155555556 | 0.43 | 90  | 14  |
| EC109 | exonic   | SYNE1    | nonsynonymous SNV    | NM_033071:c.G10579T;p.V3527F            |               | chr6  | 152679558 | 152679558 | C        | A | 0.164556962 | 0.54 | 158 | 26  |
| EC109 | exonic   | ABCA13   | frameshift deletion  | NM_152701:c.3743_3744del;p.1248_1248del |               | chr7  | 48313006  | 48313007  | TT       | - | 0.176100629 | 0.50 | 159 | 28  |
| EC109 | exonic   | MED1     | nonsynonymous SNV    | NM_004774:c.C595G;p.P199A               |               | chr17 | 37587422  | 37587422  | G        | C | 0.185185185 | 0.32 | 135 | 25  |
| EC109 | splicing | KIAA1804 |                      |                                         |               | chr1  | 233490759 | 233490759 | T        | C | 0.18852459  | 0.35 | 122 | 23  |
| EC109 | exonic   | ZNF717   | frameshift insertion | NM_001128223:c.2739_2740insT;p.F913fs   |               | chr3  | 75786035  | 75786035  | -        | A | 0.203007519 | 0.81 | 133 | 27  |
| EC109 | exonic   | ANKRD11  | nonsynonymous SNV    | NM_001256183:c.A1312G;p.K438E           |               | chr16 | 89351638  | 89351638  | T        | C | 0.203883495 | 0.67 | 103 | 21  |
| EC109 | exonic   | HHAT     | nonsynonymous SNV    | NM_001170564:c.A734G;p.Y245C            |               | chr1  | 210761343 | 210761343 | A        | G | 0.220588235 | 0.07 | 68  | 15  |
| EC109 | exonic   | SI       | nonsynonymous SNV    | NM_001041:c.C169T;p.P57S                |               | chr3  | 164792405 | 164792405 | G        | A | 0.221428571 | 0.52 | 140 | 31  |
| EC109 | exonic   | C16orf62 | stopgain SNV         | NM_020314:c.G2698T;p.E900X              |               | chr16 | 19693616  | 19693616  | G        | T | 0.224637681 | 0.48 | 138 | 31  |
| EC109 | exonic   | EPHB6    | nonsynonymous SNV    | NM_004445:c.C155T;p.P52L                |               | chr7  | 142561443 | 142561443 | C        | T | 0.224806202 | 0.55 | 129 | 29  |
| EC109 | exonic   | USP26    | nonsynonymous SNV    | NM_031907:c.A946G;p.I316V               |               | chrX  | 132161303 | 132161303 | T        | C | 0.225352113 | 0.38 | 71  | 16  |
| EC109 | exonic   | RSF1     | nonsynonymous SNV    | NM_016578:c.G751A;p.E251K               |               | chr11 | 77413523  | 77413523  | C        | T | 0.238410596 | 0.25 | 151 | 36  |
| EC109 | exonic   | PCLO     | nonsynonymous SNV    | NM_014510:c.C10559T;p.T3520M            |               | chr7  | 82579345  | 82579345  | G        | A | 0.245614035 | 0.55 | 171 | 42  |
| EC109 | exonic   | RIMS2    | nonsynonymous SNV    | NM_014677:c.G25T;p.V9F                  |               | chr8  | 104831760 | 104831760 | G        | T | 0.245901639 | 0.63 | 122 | 30  |
| EC109 | exonic   | C16orf62 | nonsynonymous SNV    | NM_020314:c.A2699G;p.E900G              |               | chr16 | 19693617  | 19693617  | A        | G | 0.25        | 0.51 | 140 | 35  |
| EC109 | exonic   | IMP2     | nonsynonymous SNV    | NM_016247:c.A91T;p.T31S                 |               | chr3  | 101038671 | 101038671 | T        | A | 0.262773723 | 0.42 | 137 | 36  |
| EC109 | exonic   | TTBK2    | nonsynonymous SNV    | NM_173500:c.G2155T;p.G719C              |               | chr15 | 43045289  | 43045289  | C        | A | 0.265060241 | 0.52 | 166 | 44  |
| EC109 | exonic   | CLCN4    | nonsynonymous SNV    | NM_001830:c.G117T;p.K39N                |               | chrX  | 10153189  | 10153189  | G        | T | 0.269565217 | 0.42 | 115 | 31  |
| EC109 | exonic   | PPM1J    | nonsynonymous SNV    | NM_005167:c.G986A;p.R329K               |               | chr1  | 113253948 | 113253948 | C        | T | 0.274509804 | 0.57 | 153 | 42  |
| EC109 | exonic   | OTOGL    | nonsynonymous SNV    | NM_173591:c.G6646C;p.G2216R             |               | chr12 | 80764407  | 80764407  | G        | C | 0.278106509 | 0.45 | 169 | 47  |
| EC109 | exonic   | KCNT2    | nonsynonymous SNV    | NM_198503:c.G849T;p.E283D               |               | chr1  | 196397370 | 196397370 | C        | A | 0.278846154 | 0.40 | 208 | 58  |
| EC109 | exonic   | SIPA1L2  | nonsynonymous SNV    | NM_020808:c.G4267A;p.E1423K             |               | chr1  | 232564300 | 232564300 | C        | T | 0.281481481 | 0.45 | 135 | 38  |
| EC109 | exonic   | MYCBP2   | nonsynonymous SNV    | NM_015057:c.G2242C;p.D748H              |               | chr13 | 77825425  | 77825425  | G        | G | 0.282258065 | 0.57 | 124 | 35  |
| EC109 | exonic   | FMN1     | nonsynonymous SNV    | NM_001103184:c.G769C;p.E257Q            |               | chr15 | 33359317  | 33359317  | C        | G | 0.290909091 | 0.44 | 110 | 32  |
| EC109 | exonic   | PAN2     | nonsynonymous SNV    | NM_001127460:c.C752T;p.A251V            |               | chr12 | 56721315  | 56721315  | G        | A | 0.301369863 | 0.32 | 73  | 22  |
| EC109 | exonic   | ZNF554   | nonsynonymous SNV    | NM_001102651:c.G1073C;p.G358A           |               | chr19 | 2834306   | 2834306   | G        | C | 0.307692308 | 0.42 | 39  | 12  |

|        |                 |        |                         |                                                   |         |       |           |           |   |         |             |      |     |     |
|--------|-----------------|--------|-------------------------|---------------------------------------------------|---------|-------|-----------|-----------|---|---------|-------------|------|-----|-----|
| EC109  | exonic          | SUFU   | nonsynonymous SNV       | NM_001178133:c.G941A:p.R314K                      |         | chr10 | 104359220 | 104359220 | G | A       | 0.314285714 | 0.68 | 70  | 22  |
| EC109  | exonic          | HYDIN  | nonsynonymous SNV       | NM_032821:c.G4757A:p.R1586H                       |         | chr16 | 71009051  | 71009051  | C | T       | 0.316       | 0.66 | 250 | 79  |
| EC109  | exonic          | TACR2  | nonsynonymous SNV       | NM_001057:c.C37A:p.P113T                          |         | chr10 | 71175743  | 71175743  | G | T       | 0.317647059 | 0.33 | 85  | 27  |
| EC109  | exonic          | URB1   | nonsynonymous SNV       | NM_014825:c.C737A:p.T246K                         |         | chr21 | 33747720  | 33747720  | G | T       | 0.319727891 | 0.66 | 147 | 47  |
| EC109  | exonic          | MYO3A  | nonsynonymous SNV       | NM_017433:c.C3463A:p.P1155T                       |         | chr10 | 26462656  | 26462656  | C | A       | 0.323529412 | 0.70 | 136 | 44  |
| EC109  | exonic          | NOTCH2 | nonsynonymous SNV       | NM_024408:c.C4660T:p.P1554S                       |         | chr1  | 120466459 | 120466459 | G | A       | 0.342105263 | 0.65 | 76  | 26  |
| EC109  | exonic          | PLXNA4 | nonsynonymous SNV       | NM_020911:c.G2050T:p.D684Y                        |         | chr7  | 131908333 | 131908333 | C | A       | 0.353846154 | 0.54 | 130 | 46  |
| EC109  | exonic          | MUC2   | nonsynonymous SNV       | NM_002457:c.C5270T:p.P1757L                       |         | chr11 | 1093451   | 1093451   | C | T       | 0.355704698 | 0.51 | 149 | 53  |
| EC109  | exonic          | DSPP   | nonframeshift insertion | NM_014208:c.2643_2644insAGTAGTGAC;p.D881delinsDSS | 1474924 | chr4  | 88536457  | 88536457  | - | GTAGTGA | 0.37037037  | 0.45 | 54  | 20  |
| EC109  | exonic          | RIMS2  | nonsynonymous SNV       | NM_014677:c.C3467A:p.T1156N                       |         | chr8  | 105264023 | 105264023 | C | A       | 0.370786517 | 0.24 | 89  | 33  |
| EC109  | exonic          | OBSCN  | nonsynonymous SNV       | NM_001098623:c.G21838A:p.V7280M                   |         | chr1  | 228560317 | 228560317 | G | A       | 0.377777778 | 0.94 | 45  | 17  |
| EC109  | exonic          | IFT172 | nonsynonymous SNV       | NM_015662:c.G3676T:p.A1226S                       |         | chr2  | 27676884  | 27676884  | C | A       | 0.380952381 | 0.38 | 21  | 8   |
| EC109  | exonic          | PRRC2C | nonsynonymous SNV       | NM_015172:c.A5677T:p.I1893F                       |         | chr1  | 171526934 | 171526934 | A | T       | 0.388888889 | 0.36 | 72  | 28  |
| EC109  | exonic          | ANK2   | nonsynonymous SNV       | NM_001148:c.G880T:p.A294S                         |         | chr4  | 114163354 | 114163354 | G | T       | 0.395348837 | 0.26 | 86  | 34  |
| EC109  | exonic          | DIP2B  | nonsynonymous SNV       | NM_173602:c.T2800G:p.C934G                        |         | chr12 | 51108328  | 51108328  | T | G       | 0.421052632 | 0.49 | 209 | 88  |
| EC109  | exonic          | TTN    | nonsynonymous SNV       | NM_003319:c.A45332T:p.E15111V                     |         | chr2  | 179438332 | 179438332 | T | A       | 0.421052632 | 0.63 | 133 | 56  |
| EC109  | exonic;splicing | CCDC93 | nonsynonymous SNV       | NM_019044:c.A1004G:p.E335G                        |         | chr2  | 118715942 | 118715942 | T | C       | 0.427272727 | 0.74 | 110 | 47  |
| EC109  | exonic          | TTN    | nonsynonymous SNV       | NM_003319:c.A7218C:p.K2406N                       |         | chr2  | 179638427 | 179638427 | T | G       | 0.428571429 | 0.53 | 84  | 36  |
| EC109  | exonic          | CSMD3  | nonsynonymous SNV       | NM_198123:c.G1310T:p.R437I                        |         | chr8  | 113988098 | 113988098 | C | A       | 0.433333333 | 0.92 | 30  | 13  |
| EC109  | exonic          | LAMA3  | nonsynonymous SNV       | NM_001127718:c.G3904A:p.V1302M                    |         | chr18 | 21519223  | 21519223  | G | A       | 0.441558442 | 0.50 | 77  | 34  |
| EC109  | exonic          | MGAT5  | nonsynonymous SNV       | NM_002410:c.G1102A:p.V368I                        |         | chr2  | 135102625 | 135102625 | G | A       | 0.445544554 | 0.42 | 101 | 45  |
| EC109  | exonic          | DMD    | nonsynonymous SNV       | NM_004014:c.A382T:p.T128S                         |         | chrX  | 31497199  | 31497199  | T | A       | 0.448051948 | 0.49 | 154 | 69  |
| EC109  | splicing        | CARD11 |                         |                                                   |         | chr7  | 2977667   | 2977667   | C | T       | 0.4921875   | 0.44 | 128 | 63  |
| EC109  | exonic          | USH2A  | nonsynonymous SNV       | NM_007123:c.C416T:p.P139L                         |         | chr1  | 216595263 | 216595263 | G | A       | 0.550724638 | 0.42 | 207 | 114 |
| EC109  | exonic;splicing | LAMA3  | nonsynonymous SNV       | NM_001127717:c.C565T:p.H189Y                      |         | chr18 | 21328024  | 21328024  | C | T       | 0.552380952 | 0.28 | 105 | 58  |
| EC109  | exonic          | ZNF836 | nonsynonymous SNV       | NM_001102657:c.G965T:p.R322I                      |         | chr19 | 52659971  | 52659971  | C | A       | 0.563380282 | 0.55 | 71  | 40  |
| EC109  | exonic          | MUC4   | nonsynonymous SNV       | NM_138297:c.C311T:p.P104L                         |         | chr3  | 195498593 | 195498593 | G | A       | 0.593406593 | 0.70 | 91  | 54  |
| EC109  | exonic          | ZNF167 | nonsynonymous SNV       | NM_018651:c.C1065A:p.D355E                        |         | chr3  | 44611667  | 44611667  | C | A       | 0.594202899 | 0.68 | 138 | 82  |
| EC109  | exonic          | MUC4   | nonsynonymous SNV       | NM_138297:c.C310T:p.P104S                         |         | chr3  | 195498594 | 195498594 | G | A       | 0.597826087 | 0.69 | 92  | 55  |
| EC109  | exonic          | MUC2   | nonsynonymous SNV       | NM_002457:c.G4534A:p.A1512T                       |         | chr11 | 1092715   | 1092715   | G | A       | 0.604166667 | 0.62 | 48  | 29  |
| EC109  | exonic          | OBSCN  | nonsynonymous SNV       | NM_001098623:c.C21050T:p.A7017V                   |         | chr1  | 228559529 | 228559529 | C | T       | 0.606557377 | 0.41 | 61  | 37  |
| EC109  | exonic          | TARSL2 | nonsynonymous SNV       | NM_152334:c.A1639G:p.T547A                        |         | chr15 | 102224289 | 102224289 | T | C       | 0.611940299 | 0.76 | 67  | 41  |
| EC109  | exonic          | ARPP21 | nonsynonymous SNV       | NM_016300:c.C1282T:p.P428S                        |         | chr3  | 35770851  | 35770851  | C | T       | 0.625       | 0.65 | 32  | 20  |
| EC109  | exonic          | NOTCH1 | nonsynonymous SNV       | NM_017617:c.G383A:p.R128H                         |         | chr9  | 139418189 | 139418189 | C | T       | 0.636363636 | 0.71 | 22  | 14  |
| EC109  | exonic          | PLEC   | nonsynonymous SNV       | NM_201378:c.G11759C:p.C3920S                      |         | chr8  | 144992188 | 144992188 | C | G       | 0.681818182 | 0.33 | 22  | 15  |
| EC109  | exonic          | PRDM9  | frameshift deletion     | NM_020227:c.219delC:p.F73fs                       |         | chr5  | 23510054  | 23510054  | C | -       | 0.76171875  | 0.68 | 256 | 195 |
| EC109  | exonic          | ZNF185 | nonsynonymous SNV       | NM_001178113:c.A86T:p.E29V                        |         | chrX  | 152087586 | 152087586 | A | T       | 0.818181818 | 0.33 | 11  | 9   |
| EC109  | exonic          | FSIP2  | nonsynonymous SNV       | NM_173651:c.A1484C:p.N495T                        |         | chr2  | 186626721 | 186626721 | A | C       | 0.987179487 | 0.38 | 78  | 77  |
| EC109  | exonic          | GRIK2  | nonsynonymous SNV       | NM_001166247:c.C1469T:p.A490V                     |         | chr6  | 102307313 | 102307313 | C | T       | 1           | 0.45 | 135 | 135 |
| EC109  | exonic          | MCOLN1 | nonsynonymous SNV       | NM_020533:c.G1150A:p.D384N                        |         | chr19 | 7594002   | 7594002   | G | A       | 1           | 0.69 | 58  | 58  |
| EC109  | exonic          | MMRN1  | stopgain SNV            | NM_007351:c.C1490G:p.S497Y                        |         | chr4  | 90856321  | 90856321  | C | G       | 1           | 0.50 | 117 | 117 |
| EC109  | exonic          | MUC2   | nonsynonymous SNV       | NM_002457:c.G2365A:p.A789T                        |         | chr11 | 1083833   | 1083833   | G | A       | 1           | 0.29 | 14  | 14  |
| EC109  | exonic          | MUC5B  | nonsynonymous SNV       | NM_002458:c.G7883A:p.R2628H                       |         | chr11 | 1265993   | 1265993   | G | A       | 1           | 0.47 | 92  | 92  |
| EC109  | exonic          | MUC5B  | nonsynonymous SNV       | NM_002458:c.A11038G:p.T3680A                      |         | chr11 | 1269148   | 1269148   | A | G       | 1           | 0.59 | 74  | 74  |
| EC109  | exonic          | SELO   | unknown                 | UNKNOWN                                           |         | chr22 | 50649274  | 50649274  | G | A       | 1           | 0.35 | 20  | 20  |
| EC109  | exonic          | TTN    | nonsynonymous SNV       | NM_003319:c.A26731G:p.I8911V                      |         | chr2  | 179469978 | 179469978 | T | C       | 1           | 0.16 | 25  | 25  |
| EC109  | exonic          | TTN    | nonsynonymous SNV       | NM_133378:c.C28025A:p.P9342Q                      |         | chr2  | 179556748 | 179556748 | G | T       | 1           | 0.70 | 103 | 103 |
| EC109  | exonic          | YSK4   | nonsynonymous SNV       | NM_001018046:c.A29C:p.H10P                        |         | chr2  | 135779394 | 135779394 | T | C       | 1           | 0.29 | 75  | 75  |
| KYSE30 | exonic          | MLL3   | nonsynonymous SNV       | NM_170606:c.T3340C:p.C1114R                       |         | chr7  | 151919751 | 151919751 | A | G       | 0.08        | 0.40 | 125 | 10  |
| KYSE30 | exonic          | MUC16  | nonsynonymous SNV       | NM_024690:c.A40729G:p.S13577G                     |         | chr19 | 8999446   | 8999446   | T | C       | 0.083333333 | 0.27 | 132 | 11  |
| KYSE30 | exonic          | MUC4   | nonsynonymous SNV       | NM_018406:c.C8800T:p.L2934F                       |         | chr3  | 195509651 | 195509651 | G | A       | 0.084432718 | 0.75 | 379 | 32  |
| KYSE30 | exonic          | MUC4   | nonsynonymous SNV       | NM_018406:c.G4936A:p.A1646T                       | 1645683 | chr3  | 195513515 | 195513515 | C | T       | 0.088172043 | 0.78 | 465 | 41  |
| KYSE30 | exonic          | MYH8   | nonsynonymous SNV       | NM_002472:c.A3634T:p.N1212Y                       |         | chr17 | 10303808  | 10303808  | T | A       | 0.088235294 | 0.19 | 238 | 21  |
| KYSE30 | exonic          | MUC2   | nonsynonymous SNV       | NM_002457:c.C4679T:p.T1560M                       |         | chr11 | 1092860   | 1092860   | C | T       | 0.090909091 | 0.95 | 220 | 20  |
| KYSE30 | exonic          | MUC4   | nonsynonymous SNV       | NM_018406:c.A11128G:p.T3710A                      |         | chr3  | 195507323 | 195507323 | T | C       | 0.090909091 | 0.51 | 451 | 41  |
| KYSE30 | exonic          | MUC6   | nonsynonymous SNV       | NM_005961:c.C5912T:p.P1971L                       |         | chr11 | 1016889   | 1016889   | G | A       | 0.092936803 | 0.44 | 269 | 25  |
| KYSE30 | exonic          | ZNF717 | nonsynonymous SNV       | NM_001128223:c.C2510A:p.T837K                     |         | chr3  | 75786264  | 75786264  | G | T       | 0.096320275 | 0.52 | 218 | 21  |
| KYSE30 | exonic          | MUC6   | nonsynonymous SNV       | NM_005961:c.C4889T:p.T1630I                       |         | chr11 | 1017912   | 1017912   | G | A       | 0.096774194 | 0.28 | 186 | 18  |

|        |                 |                  |                         |                                                       |                |       |           |           |         |         |             |      |     |    |
|--------|-----------------|------------------|-------------------------|-------------------------------------------------------|----------------|-------|-----------|-----------|---------|---------|-------------|------|-----|----|
| KYSE30 | exonic          | <i>MUC4</i>      | nonsynonymous SNV       | NM_018406:c.T8572C:p.S2858P                           |                | chr3  | 195509879 | 195509879 | A       | G       | 0.098039216 | 0.72 | 255 | 25 |
| KYSE30 | exonic          | <i>ZNF717</i>    | stopgain SNV            | NM_001128223:c.1730_1731insAAGTCAT:p.F577_L578delinsX |                | chr3  | 75787044  | 75787044  | -       | ATGACTT | 0.098181818 | 0.15 | 275 | 27 |
| KYSE30 | exonic          | <i>MUC6</i>      | nonsynonymous SNV       | NM_005961:c.C5494T:p.P1832S                           |                | chr11 | 1017307   | 1017307   | G       | A       | 0.100628931 | 0.44 | 159 | 16 |
| KYSE30 | exonic          | <i>MUC4</i>      | nonsynonymous SNV       | NM_018406:c.C11258T:p.A3753V                          |                | chr3  | 195507193 | 195507193 | G       | A       | 0.100746269 | 0.33 | 268 | 27 |
| KYSE30 | exonic          | <i>MUC4</i>      | nonsynonymous SNV       | NM_018406:c.C8734A:p.P2912T                           |                | chr3  | 195509717 | 195509717 | G       | T       | 0.104519774 | 0.41 | 354 | 37 |
| KYSE30 | exonic          | <i>MUC4</i>      | nonsynonymous SNV       | NM_018406:c.C11231T:p.P3744L                          |                | chr3  | 195507220 | 195507220 | G       | A       | 0.107033639 | 0.60 | 327 | 35 |
| KYSE30 | exonic          | <i>ZNF717</i>    | nonsynonymous SNV       | NM_001128223:c.A973G:p.S325G                          |                | chr3  | 75787801  | 75787801  | T       | C       | 0.110091743 | 0.81 | 327 | 36 |
| KYSE30 | exonic          | <i>GPR98</i>     | frameshift deletion     | NM_032119:c.16119_16129del:p.5373_5377del             |                | chr5  | 90111476  | 90111486  | CCCAGAG | -       | 0.112426036 | 0.68 | 169 | 19 |
| KYSE30 | exonic          | <i>MYH8</i>      | nonsynonymous SNV       | NM_002472:c.G793A:p.D265N                             |                | chr17 | 10318445  | 10318445  | C       | T       | 0.123893805 | 0.62 | 339 | 42 |
| KYSE30 | exonic          | <i>MUC16</i>     | nonsynonymous SNV       | NM_024690:c.G40687A:p.D13563N                         |                | chr19 | 8999488   | 8999488   | C       | T       | 0.125       | 0.18 | 88  | 11 |
| KYSE30 | exonic          | <i>ZNF717</i>    | nonsynonymous SNV       | NM_001128223:c.C503T:p.P168L                          |                | chr3  | 75788271  | 75788271  | G       | A       | 0.125       | 0.48 | 264 | 33 |
| KYSE30 | exonic          | <i>MUC4</i>      | nonsynonymous SNV       | NM_018406:c.G8775C:p.Q2925H                           | 1645684        | chr3  | 195509676 | 195509676 | C       | G       | 0.131964809 | 0.62 | 341 | 45 |
| KYSE30 | exonic          | <i>MUC2</i>      | nonsynonymous SNV       | NM_002457:c.C5114T:p.T1705I                           |                | chr11 | 1093295   | 1093295   | C       | T       | 0.138461538 | 0.61 | 130 | 18 |
| KYSE30 | exonic          | <i>SHANK2</i>    | nonsynonymous SNV       | NM_133266:c.G2305A:p.G769S                            |                | chr11 | 70332329  | 70332329  | C       | T       | 0.142276423 | 0.51 | 246 | 35 |
| KYSE30 | exonic          | <i>MUC4</i>      | nonsynonymous SNV       | NM_018406:c.C3076T:p.P1026S                           | 645681;164568  | chr3  | 195515375 | 195515375 | G       | A       | 0.146520147 | 0.33 | 273 | 40 |
| KYSE30 | exonic          | <i>EPPK1</i>     | nonsynonymous SNV       | NM_031308:c.G7132C:p.D2378H                           |                | chr8  | 144940290 | 144940290 | C       | G       | 0.148275862 | 0.74 | 290 | 43 |
| KYSE30 | exonic          | <i>GPR98</i>     | nonsynonymous SNV       | NM_032119:c.G16130T:p.G5377V                          |                | chr5  | 90111487  | 90111487  | G       | T       | 0.15        | 0.54 | 160 | 24 |
| KYSE30 | splicing        | <i>KIAA1429</i>  |                         |                                                       |                | chr8  | 95508121  | 95508121  | T       | C       | 0.155251142 | 0.29 | 219 | 34 |
| KYSE30 | exonic          | <i>TTN</i>       | nonsynonymous SNV       | NM_003319:c.G66634A:p.D22212N                         |                | chr2  | 179412524 | 179412524 | C       | T       | 0.157232704 | 0.48 | 318 | 50 |
| KYSE30 | exonic          | <i>MUC2</i>      | nonsynonymous SNV       | NM_002457:c.A4678C:p.T1560P                           |                | chr11 | 1092859   | 1092859   | A       | C       | 0.160550459 | 0.77 | 218 | 35 |
| KYSE30 | exonic          | <i>MUC4</i>      | nonsynonymous SNV       | NM_018406:c.A3037G:p.S1013G                           | 581;1645683;16 | chr3  | 195515414 | 195515414 | T       | C       | 0.1625      | 0.15 | 160 | 26 |
| KYSE30 | exonic          | <i>MUC4</i>      | nonsynonymous SNV       | NM_018406:c.C4997A:p.P1666H                           |                | chr3  | 195513454 | 195513454 | G       | T       | 0.164759725 | 0.57 | 437 | 72 |
| KYSE30 | exonic          | <i>KLHL1</i>     | nonsynonymous SNV       | NM_020866:c.G1676A:p.G559E                            |                | chr13 | 70314652  | 70314652  | C       | T       | 0.172248804 | 0.44 | 209 | 36 |
| KYSE30 | exonic          | <i>TTN</i>       | nonsynonymous SNV       | NM_003319:c.A49162G:p.T16388A                         |                | chr2  | 179434502 | 179434502 | T       | C       | 0.173469388 | 0.68 | 196 | 34 |
| KYSE30 | exonic          | <i>TG</i>        | nonsynonymous SNV       | NM_003235:c.G5560A:p.E1854K                           |                | chr8  | 133978816 | 133978816 | G       | A       | 0.18503937  | 0.55 | 254 | 47 |
| KYSE30 | exonic          | <i>ASXL1</i>     | nonsynonymous SNV       | NM_015338:c.C2126T:p.A709V                            |                | chr20 | 31022641  | 31022641  | C       | T       | 0.189873418 | 0.57 | 158 | 30 |
| KYSE30 | exonic          | <i>TTN</i>       | nonsynonymous SNV       | NM_133378:c.G31385A:p.R10462Q                         |                | chr2  | 179535837 | 179535837 | C       | T       | 0.205020921 | 0.63 | 239 | 49 |
| KYSE30 | exonic          | <i>COL24A1</i>   | nonsynonymous SNV       | NM_152890:c.G4150T:p.G1384C                           |                | chr1  | 86249959  | 86249959  | C       | A       | 0.2125      | 0.68 | 160 | 34 |
| KYSE30 | exonic          | <i>TTN</i>       | nonsynonymous SNV       | NM_003319:c.C23534A:p.T10845N                         |                | chr2  | 179456902 | 179456902 | G       | T       | 0.21319797  | 0.43 | 197 | 42 |
| KYSE30 | exonic          | <i>ADAMTS12</i>  | nonsynonymous SNV       | NM_030955:c.G613A:p.E205K                             |                | chr5  | 33751530  | 33751530  | C       | T       | 0.218579235 | 0.68 | 183 | 40 |
| KYSE30 | exonic          | <i>TTN</i>       | nonsynonymous SNV       | NM_133378:c.C17924T:p.S5975F                          |                | chr2  | 179588171 | 179588171 | G       | A       | 0.224334601 | 0.54 | 263 | 59 |
| KYSE30 | exonic          | <i>CACNA1B</i>   | nonsynonymous SNV       | NM_000718:c.C6687A:p.S2229R                           |                | chr9  | 141016118 | 141016118 | C       | A       | 0.227272727 | 0.60 | 44  | 10 |
| KYSE30 | exonic          | <i>APC</i>       | nonsynonymous SNV       | NM_00112751:c.G6540T:p.L2180F                         | 1109799        | chr5  | 112177885 | 112177885 | G       | T       | 0.230215827 | 0.56 | 139 | 32 |
| KYSE30 | exonic          | <i>PRDM2</i>     | nonsynonymous SNV       | NM_001007257:c.C847T:p.P283S                          |                | chr1  | 14105740  | 14105740  | C       | T       | 0.231343284 | 0.45 | 134 | 31 |
| KYSE30 | exonic          | <i>RP1</i>       | nonsynonymous SNV       | NM_006269:c.G242A:p.R81K                              |                | chr8  | 55533768  | 55533768  | G       | A       | 0.23255814  | 0.40 | 43  | 10 |
| KYSE30 | exonic          | <i>AHNAK2</i>    | nonsynonymous SNV       | NM_138420:c.G14072A:p.G4691E                          |                | chr14 | 105407716 | 105407716 | C       | T       | 0.233009709 | 0.33 | 103 | 24 |
| KYSE30 | exonic          | <i>TP53</i>      | nonsynonymous SNV       | NM_001126115:c.G580A:p.E194K                          | 0946;946371;1  | chr17 | 7576870   | 7576870   | C       | T       | 0.242424242 | 0.67 | 99  | 24 |
| KYSE30 | exonic          | <i>SYNE1</i>     | nonsynonymous SNV       | NM_033071:c.A18046G:p.R6016G                          |                | chr6  | 152603064 | 152603064 | T       | C       | 0.25        | 0.41 | 88  | 22 |
| KYSE30 | exonic          | <i>ZNF836</i>    | nonsynonymous SNV       | NM_001102657:c.T2054C:p.L685P                         |                | chr19 | 52658882  | 52658882  | A       | G       | 0.25095057  | 0.38 | 263 | 66 |
| KYSE30 | exonic          | <i>PCDH20</i>    | nonsynonymous SNV       | NM_022843:c.G718T:p.G240C                             |                | chr13 | 61987514  | 61987514  | C       | A       | 0.252525253 | 0.44 | 99  | 25 |
| KYSE30 | exonic          | <i>SECISBP2L</i> | nonsynonymous SNV       | NM_014701:c.C2786T:p.S929F                            |                | chr15 | 49284826  | 49284826  | G       | A       | 0.263157895 | 0.24 | 95  | 25 |
| KYSE30 | exonic          | <i>FBN2</i>      | nonsynonymous SNV       | NM_001999:c.G4919T:p.R1640I                           |                | chr5  | 127647606 | 127647606 | C       | A       | 0.271604938 | 0.43 | 162 | 44 |
| KYSE30 | exonic          | <i>C9orf170</i>  | nonsynonymous SNV       | NM_001001709:c.G279C:p.L93F                           |                | chr9  | 89771598  | 89771598  | G       | C       | 0.273809524 | 0.48 | 168 | 46 |
| KYSE30 | splicing        | <i>CWF19L2</i>   |                         |                                                       |                | chr11 | 107207441 | 107207441 | -       | A       | 0.274509804 | 0.50 | 51  | 14 |
| KYSE30 | exonic          | <i>CTC1</i>      | nonsynonymous SNV       | NM_025099:c.A194C:p.Y65S                              |                | chr17 | 8146306   | 8146306   | T       | G       | 0.275       | 0.91 | 40  | 11 |
| KYSE30 | exonic          | <i>NBEA</i>      | nonsynonymous SNV       | NM_015678:c.C5186A:p.A1729E                           |                | chr13 | 35770259  | 35770259  | C       | A       | 0.28        | 0.64 | 150 | 42 |
| KYSE30 | exonic          | <i>DSPP</i>      | nonframeshift insertion | NM_014208:c.2643_2644insAGTAGTGAC:p.D881delinsDSS     | 1474924        | chr4  | 88536457  | 88536457  | -       | GTAGTGA | 0.28125     | 0.61 | 64  | 18 |
| KYSE30 | exonic          | <i>ABCA13</i>    | frameshift deletion     | NM_152701:c.14616delG:p.V4872fs                       |                | chr7  | 48626860  | 48626860  | G       | -       | 0.284313725 | 0.31 | 102 | 29 |
| KYSE30 | exonic          | <i>HSPBAP1</i>   | nonsynonymous SNV       | NM_024610:c.C500T:p.S167F                             |                | chr3  | 122478140 | 122478140 | G       | A       | 0.29        | 0.79 | 100 | 29 |
| KYSE30 | exonic          | <i>PPPIA2</i>    | nonsynonymous SNV       | NM_001220478:c.G2647C:p.V983L                         |                | chr12 | 81678064  | 81678064  | C       | G       | 0.290322581 | 0.37 | 93  | 27 |
| KYSE30 | exonic          | <i>IMPG2</i>     | nonsynonymous SNV       | NM_016247:c.A3188T:p.N1063I                           |                | chr3  | 100951670 | 100951670 | T       | A       | 0.293413174 | 0.61 | 167 | 49 |
| KYSE30 | exonic          | <i>PRKD1</i>     | nonsynonymous SNV       | NM_002742:c.C436T:p.P146S                             |                | chr14 | 30135382  | 30135382  | G       | A       | 0.298013245 | 0.42 | 151 | 45 |
| KYSE30 | exonic          | <i>SEC14L5</i>   | nonsynonymous SNV       | NM_014692:c.C1171T:p.R391W                            |                | chr16 | 5053443   | 5053443   | C       | T       | 0.303030303 | 0.50 | 33  | 10 |
| KYSE30 | exonic          | <i>COL12A1</i>   | nonsynonymous SNV       | NM_080645:c.C5075T:p.P1692L                           |                | chr6  | 75806979  | 75806979  | G       | A       | 0.305084746 | 0.31 | 118 | 36 |
| KYSE30 | exonic;splicing | <i>GRM1</i>      | nonsynonymous SNV       | NM_000838:c.G701A:p.G234E                             |                | chr6  | 146480484 | 146480484 | G       | A       | 0.305555556 | 0.52 | 108 | 33 |
| KYSE30 | exonic          | <i>AHNAK2</i>    | nonsynonymous SNV       | NM_138420:c.C3726G:p.F1242L                           |                | chr14 | 105418062 | 105418062 | G       | C       | 0.307692308 | 0.39 | 91  | 28 |
| KYSE30 | exonic          | <i>CYLD</i>      | nonsynonymous SNV       | NM_001042355:c.C1318A:p.Q440K                         |                | chr16 | 50813764  | 50813764  | C       | A       | 0.317307692 | 0.61 | 104 | 33 |
| KYSE30 | exonic          | <i>MYO18B</i>    | nonsynonymous SNV       | NM_032608:c.G2833A:p.D945N                            |                | chr22 | 26224789  | 26224789  | G       | A       | 0.31884058  | 0.36 | 69  | 22 |

|        |          |                  |                        |                                           |  |       |           |           |     |   |             |      |     |     |
|--------|----------|------------------|------------------------|-------------------------------------------|--|-------|-----------|-----------|-----|---|-------------|------|-----|-----|
| KYSE30 | exonic   | <i>SYNE1</i>     | nonsynonymous SNV      | NM_033071:c.G24978A:p.M8326I              |  | chr6  | 152462462 | 152462462 | C   | T | 0.326315789 | 0.39 | 95  | 31  |
| KYSE30 | exonic   | <i>VCAN</i>      | nonsynonymous SNV      | NM_001164097:c.C4692A:p.D1564E            |  | chr5  | 82836475  | 82836475  | C   | A | 0.329411765 | 0.50 | 170 | 56  |
| KYSE30 | exonic   | <i>DNAH7</i>     | nonsynonymous SNV      | NM_018897:c.C6964A:p.H2322N               |  | chr2  | 196729415 | 196729415 | G   | T | 0.333333333 | 0.47 | 330 | 110 |
| KYSE30 | exonic   | <i>LINS</i>      | nonsynonymous SNV      | NM_001040616:c.A144T:p.E48D               |  | chr15 | 101120904 | 101120904 | T   | A | 0.333333333 | 0.46 | 78  | 26  |
| KYSE30 | exonic   | <i>PRRC2C</i>    | nonsynonymous SNV      | NM_015172:c.C5168G:p.S1723C               |  | chr1  | 171526425 | 171526425 | C   | G | 0.333333333 | 0.60 | 105 | 35  |
| KYSE30 | exonic   | <i>GOLGB1</i>    | nonsynonymous SNV      | NM_001256488:c.C2195G:p.S732C             |  | chr3  | 121416935 | 121416935 | G   | C | 0.33557047  | 0.36 | 149 | 50  |
| KYSE30 | exonic   | <i>GPR98</i>     | nonsynonymous SNV      | NM_032119:c.G5351T:p.R1784I               |  | chr5  | 89971934  | 89971934  | G   | T | 0.339181287 | 0.57 | 171 | 58  |
| KYSE30 | exonic   | <i>SLC4A10</i>   | nonsynonymous SNV      | NM_022058:c.C2096G:p.S699C                |  | chr2  | 162804158 | 162804158 | C   | G | 0.356725146 | 0.61 | 171 | 61  |
| KYSE30 | exonic   | <i>ZNF107</i>    | nonsynonymous SNV      | NM_001013746:c.G412A:p.G138R              |  | chr7  | 64167094  | 64167094  | G   | A | 0.359223301 | 0.35 | 103 | 37  |
| KYSE30 | exonic   | <i>UBN1</i>      | nonsynonymous SNV      | NM_016936:c.G2256C:p.E752D                |  | chr16 | 4924667   | 4924667   | G   | C | 0.365217391 | 0.31 | 115 | 42  |
| KYSE30 | exonic   | <i>CCT8L2</i>    | nonsynonymous SNV      | NM_014406:c.G1623C:p.K541N                |  | chr22 | 17071818  | 17071818  | C   | G | 0.37398374  | 0.54 | 123 | 46  |
| KYSE30 | exonic   | <i>FAM208B</i>   | nonframeshift deletion | NM_017782:c.3698_3700del:p.L233_1234del   |  | chr10 | 5789082   | 5789084   | ACT | - | 0.374301676 | 0.39 | 179 | 67  |
| KYSE30 | exonic   | <i>CCDC93</i>    | nonsynonymous SNV      | NM_019044:c.C352T:p.P118S                 |  | chr2  | 118758408 | 118758408 | G   | A | 0.37804878  | 0.77 | 82  | 31  |
| KYSE30 | exonic   | <i>C1orf34</i>   | nonsynonymous SNV      | NM_001105528:c.A2105G:p.K702R             |  | chr18 | 30791993  | 30791993  | T   | C | 0.380434783 | 0.43 | 92  | 35  |
| KYSE30 | exonic   | <i>PRRC2A</i>    | nonsynonymous SNV      | NM_004638:c.G1953C:p.Q651H                |  | chr6  | 31597108  | 31597108  | G   | C | 0.383561644 | 0.36 | 73  | 28  |
| KYSE30 | exonic   | <i>MATN4</i>     | nonsynonymous SNV      | NM_030592:c.C1295T:p.T432M                |  | chr20 | 43926596  | 43926596  | G   | A | 0.388888889 | 0.29 | 18  | 7   |
| KYSE30 | splicing | <i>CSN1S1</i>    |                        |                                           |  | chr4  | 70802173  | 70802173  | G   | A | 0.407079646 | 0.54 | 113 | 46  |
| KYSE30 | exonic   | <i>TTN</i>       | nonsynonymous SNV      | NM_003319:c.C48835T:p.R16279W             |  | chr2  | 179434829 | 179434829 | G   | A | 0.440233236 | 0.48 | 343 | 151 |
| KYSE30 | exonic   | <i>WDR66</i>     | nonsynonymous SNV      | NM_001178003:c.A1475T:p.K492M             |  | chr12 | 122392180 | 122392180 | A   | T | 0.447058824 | 0.24 | 85  | 38  |
| KYSE30 | exonic   | <i>MYT1L</i>     | nonsynonymous SNV      | NM_015025:c.T2486C:p.I829T                |  | chr2  | 1893041   | 1893041   | A   | G | 0.447916667 | 0.47 | 96  | 43  |
| KYSE30 | exonic   | <i>FAM75D4</i>   | stopgain SNV           | NM_001145197:c.C2611T:p.R871X             |  | chr9  | 84547687  | 84547687  | C   | T | 0.571428571 | 0.75 | 14  | 8   |
| KYSE30 | exonic   | <i>MUC4</i>      | nonsynonymous SNV      | NM_018406:c.C9783G:p.D3261E               |  | chr3  | 195508668 | 195508668 | G   | C | 0.571428571 | 0.08 | 21  | 12  |
| KYSE30 | exonic   | <i>MUC4</i>      | nonsynonymous SNV      | NM_018406:c.G9781C:p.D3261H               |  | chr3  | 195508670 | 195508670 | C   | G | 0.571428571 | 0.08 | 21  | 12  |
| KYSE30 | exonic   | <i>SON</i>       | nonsynonymous SNV      | NM_032195:c.T2338A:p.S780T                |  | chr21 | 34923875  | 34923875  | T   | A | 0.586956522 | 0.15 | 46  | 27  |
| KYSE30 | splicing | <i>PXN</i>       |                        |                                           |  | chr12 | 120653362 | 120653362 | C   | G | 0.6         | 0.93 | 25  | 15  |
| KYSE30 | exonic   | <i>MUC4</i>      | nonsynonymous SNV      | NM_138297:c.G2315A:p.G772D                |  | chr3  | 195481236 | 195481236 | C   | T | 0.607142857 | 0.35 | 56  | 34  |
| KYSE30 | exonic   | <i>BCORL1</i>    | nonsynonymous SNV      | NM_021946:c.C1088T:p.S363F                |  | chrX  | 129147836 | 129147836 | C   | T | 0.608695652 | 0.29 | 23  | 14  |
| KYSE30 | splicing | <i>TP53</i>      |                        | 687800:687997;688013;749713:905938;905972 |  | chr17 | 7577610   | 7577610   | T   | C | 0.666666667 | 0.09 | 33  | 22  |
| KYSE30 | exonic   | <i>MUC4</i>      | nonsynonymous SNV      | NM_018406:c.C11468T:p.T3823I              |  | chr3  | 195506983 | 195506983 | G   | A | 0.706896552 | 0.41 | 58  | 41  |
| KYSE30 | exonic   | <i>NAA35</i>     | nonsynonymous SNV      | NM_024635:c.A1022T:p.E341V                |  | chr9  | 88611458  | 88611458  | A   | T | 0.715151515 | 0.49 | 165 | 118 |
| KYSE30 | exonic   | <i>HMCN1</i>     | nonsynonymous SNV      | NM_031935:c.C10849A:p.H3617N              |  | chr1  | 186076094 | 186076094 | C   | A | 0.719178082 | 0.26 | 146 | 105 |
| KYSE30 | exonic   | <i>MUC2</i>      | nonsynonymous SNV      | NM_002457:c.G4534A:p.A1512T               |  | chr11 | 1092715   | 1092715   | G   | A | 0.733333333 | 0.64 | 30  | 22  |
| KYSE30 | exonic   | <i>HIST2H2AC</i> | nonsynonymous SNV      | NM_003517:c.G274A:p.E92K                  |  | chr1  | 149858798 | 149858798 | G   | A | 0.743589744 | 0.69 | 39  | 29  |
| KYSE30 | exonic   | <i>MUC4</i>      | nonsynonymous SNV      | NM_018406:c.C11511G:p.H3837Q              |  | chr3  | 195506940 | 195506940 | G   | C | 0.857142857 | 0.58 | 14  | 12  |
| KYSE30 | exonic   | <i>SON</i>       | nonsynonymous SNV      | NM_032195:c.T2308A:p.S770T                |  | chr21 | 34923845  | 34923845  | T   | A | 0.985714286 | 0.72 | 70  | 69  |
| KYSE30 | exonic   | <i>LG11</i>      | nonsynonymous SNV      | NM_005097:c.G626A:p.R209H                 |  | chr10 | 95552622  | 95552622  | G   | A | 0.989690722 | 0.38 | 97  | 96  |
| KYSE30 | exonic   | <i>MAP3K15</i>   | nonsynonymous SNV      | NM_001001671:c.G1833C:p.E611D             |  | chrX  | 19425317  | 19425317  | C   | G | 1           | 0.61 | 28  | 28  |
| KYSE30 | exonic   | <i>RASGRP3</i>   | nonsynonymous SNV      | NM_015376:c.T44C:p.L15P                   |  | chr2  | 33740247  | 33740247  | T   | C | 1           | 0.43 | 212 | 212 |
| KYSE50 | exonic   | <i>ITGAL</i>     | nonsynonymous SNV      | NM_002209:c.G437A:p.G146D                 |  | chr16 | 30490521  | 30490521  | G   | A | 0.082802548 | 0.54 | 157 | 13  |
| KYSE50 | exonic   | <i>MUC4</i>      | nonsynonymous SNV      | NM_018406:c.G10045A:p.D3349N              |  | chr3  | 195508406 | 195508406 | C   | T | 0.083116883 | 0.09 | 385 | 32  |
| KYSE50 | exonic   | <i>ZNF34</i>     | nonsynonymous SNV      | NM_030580:c.A717T:p.K239N                 |  | chr8  | 14599617  | 14599617  | T   | A | 0.083333333 | 0.89 | 108 | 9   |
| KYSE50 | exonic   | <i>SYNE1</i>     | nonsynonymous SNV      | NM_033071:c.C12305T:p.S4102L              |  | chr6  | 152657986 | 152657986 | G   | A | 0.084507042 | 0.67 | 71  | 6   |
| KYSE50 | exonic   | <i>MUC6</i>      | nonsynonymous SNV      | NM_005961:c.G4918A:p.A1640T               |  | chr11 | 1017883   | 1017883   | C   | T | 0.085526316 | 0.38 | 152 | 13  |
| KYSE50 | exonic   | <i>ZNF717</i>    | nonsynonymous SNV      | NM_001128223:c.G392A:p.G131E              |  | chr3  | 75788382  | 75788382  | C   | T | 0.087912088 | 0.88 | 91  | 8   |
| KYSE50 | exonic   | <i>MUC4</i>      | nonsynonymous SNV      | NM_018406:c.C8282T:p.A2761V               |  | chr3  | 195510169 | 195510169 | G   | A | 0.089285714 | 0.96 | 280 | 25  |
| KYSE50 | exonic   | <i>CMYA5</i>     | nonsynonymous SNV      | NM_153610:c.G4243A:p.E1415K               |  | chr5  | 79028831  | 79028831  | G   | A | 0.08974359  | 0.43 | 78  | 7   |
| KYSE50 | exonic   | <i>BRAF</i>      | nonsynonymous SNV      | NM_004333:c.G1045T:p.A349S                |  | chr7  | 140494203 | 140494203 | C   | A | 0.090163934 | 0.64 | 122 | 11  |
| KYSE50 | exonic   | <i>MUC2</i>      | nonsynonymous SNV      | NM_002457:c.C4703T:p.T1568M               |  | chr11 | 1092884   | 1092884   | C   | T | 0.091397849 | 0.65 | 372 | 34  |
| KYSE50 | exonic   | <i>SI</i>        | nonsynonymous SNV      | NM_001041:c.G1836A:p.M612I                |  | chr3  | 164764680 | 164764680 | C   | T | 0.093103448 | 0.41 | 290 | 27  |
| KYSE50 | exonic   | <i>MUC6</i>      | nonsynonymous SNV      | NM_005961:c.C4889T:p.T1630I               |  | chr11 | 1017912   | 1017912   | G   | A | 0.094674556 | 0.44 | 169 | 16  |
| KYSE50 | exonic   | <i>MUC4</i>      | nonsynonymous SNV      | NM_018406:c.G2992A:p.A998T                |  | chr3  | 195515459 | 195515459 | C   | T | 0.097345133 | 0.45 | 113 | 11  |
| KYSE50 | exonic   | <i>RNF216</i>    | nonsynonymous SNV      | NM_207111:c.C1565T:p.S522F                |  | chr7  | 5760743   | 5760743   | G   | A | 0.102719033 | 0.35 | 331 | 34  |
| KYSE50 | exonic   | <i>MUC2</i>      | nonsynonymous SNV      | NM_002457:c.C5114T:p.T1705I               |  | chr11 | 1093295   | 1093295   | C   | T | 0.102857143 | 0.67 | 175 | 18  |
| KYSE50 | exonic   | <i>SEC22B</i>    | unknown                | UNKNOWN                                   |  | chr1  | 145115815 | 145115815 | A   | C | 0.107305936 | 0.45 | 438 | 47  |
| KYSE50 | exonic   | <i>EPAS1</i>     | nonsynonymous SNV      | NM_001430:c.G1610A:p.G537E                |  | chr2  | 46607421  | 46607421  | G   | A | 0.107526882 | 0.30 | 93  | 10  |
| KYSE50 | exonic   | <i>THSD7A</i>    | nonsynonymous SNV      | NM_015204:c.C3001A:p.Q1001K               |  | chr7  | 11485751  | 11485751  | G   | T | 0.107569721 | 0.48 | 251 | 27  |
| KYSE50 | exonic   | <i>PIK3CA</i>    | nonsynonymous SNV      | NM_006218:c.G485A:p.R162K                 |  | chr3  | 178917610 | 178917610 | G   | A | 0.108870968 | 0.44 | 248 | 27  |
| KYSE50 | exonic   | <i>MUC4</i>      | nonsynonymous SNV      | NM_018406:c.C7181A:p.S2394Y               |  | chr3  | 195511270 | 195511270 | G   | T | 0.109819121 | 0.42 | 774 | 85  |

|        |                 |                 |                        |                                       |                |       |           |           |          |    |             |      |     |     |
|--------|-----------------|-----------------|------------------------|---------------------------------------|----------------|-------|-----------|-----------|----------|----|-------------|------|-----|-----|
| KYSE50 | exonic          | <i>MLL3</i>     | nonsynonymous SNV      | NM_170606:c.G943T;p.G315C             |                | chr7  | 151970859 | 151970859 | C        | A  | 0.111940299 | 0.49 | 402 | 45  |
| KYSE50 | exonic          | <i>MUC4</i>     | nonsynonymous SNV      | NM_018406:c.C3317A;p.P1106H           |                | chr3  | 195515134 | 195515134 | G        | T  | 0.112820513 | 0.50 | 195 | 22  |
| KYSE50 | exonic          | <i>C17orf57</i> | nonsynonymous SNV      | NM_001195192:c.G157A;p.E53K           |                | chr17 | 45412688  | 45412688  | G        | A  | 0.120967742 | 0.27 | 124 | 15  |
| KYSE50 | exonic          | <i>FNDC1</i>    | nonsynonymous SNV      | NM_032532:c.G4058A;p.G1353E           |                | chr6  | 159657337 | 159657337 | G        | A  | 0.13        | 0.38 | 100 | 13  |
| KYSE50 | exonic          | <i>MUC4</i>     | nonsynonymous SNV      | NM_018406:c.C3399G;p.H1133Q           |                | chr3  | 195515052 | 195515052 | G        | C  | 0.131313131 | 0.23 | 99  | 13  |
| KYSE50 | exonic:splicing | <i>LRP2</i>     | nonsynonymous SNV      | NM_004525:c.G6470A;p.G2157E           |                | chr2  | 170063760 | 170063760 | C        | T  | 0.133333333 | 0.13 | 60  | 8   |
| KYSE50 | exonic          | <i>SHANK2</i>   | nonsynonymous SNV      | NM_133266:c.G2302A;p.E768K            |                | chr11 | 70323332  | 70323332  | C        | T  | 0.1375      | 0.27 | 80  | 11  |
| KYSE50 | exonic          | <i>MITF</i>     | nonsynonymous SNV      | NM_006722:c.C149T;p.S50F              |                | chr3  | 69928332  | 69928332  | C        | T  | 0.145833333 | 0.43 | 48  | 7   |
| KYSE50 | exonic          | <i>TTN</i>      | nonsynonymous SNV      | NM_003319:c.C70787A;p.T23596N         |                | chr2  | 179404911 | 179404911 | G        | T  | 0.152866242 | 0.38 | 157 | 24  |
| KYSE50 | exonic          | <i>MUC4</i>     | nonsynonymous SNV      | NM_018406:c.C8734A;p.P2912T           |                | chr3  | 195509717 | 195509717 | G        | T  | 0.159375    | 0.33 | 320 | 51  |
| KYSE50 | exonic          | <i>WDR87</i>    | nonsynonymous SNV      | NM_031951:c.G6101A;p.G2034E           |                | chr19 | 38378093  | 38378093  | C        | T  | 0.160714286 | 0.56 | 168 | 27  |
| KYSE50 | exonic          | <i>MUC2</i>     | nonsynonymous SNV      | NM_002457:c.A4678C;p.T1560P           |                | chr11 | 1092859   | 1092859   | A        | C  | 0.162068966 | 0.81 | 290 | 47  |
| KYSE50 | exonic          | <i>ERCC3</i>    | nonsynonymous SNV      | NM_000122:c.G440C;p.G147A             |                | chr2  | 128050217 | 128050217 | C        | G  | 0.162790698 | 0.86 | 86  | 14  |
| KYSE50 | exonic          | <i>MUC4</i>     | nonsynonymous SNV      | NM_018406:c.C8800T;p.L2934F           |                | chr3  | 195509651 | 195509651 | G        | A  | 0.162857143 | 0.72 | 350 | 57  |
| KYSE50 | exonic          | <i>TTN</i>      | nonsynonymous SNV      | NM_003319:c.G26138A;p.R8713K          |                | chr2  | 179471996 | 179471996 | C        | T  | 0.163090129 | 0.53 | 233 | 38  |
| KYSE50 | exonic          | <i>MUC4</i>     | nonsynonymous SNV      | NM_018406:c.A3037G;p.S1013G           | 581:1645683;16 | chr3  | 195515414 | 195515414 | T        | C  | 0.172661871 | 0.29 | 139 | 24  |
| KYSE50 | exonic          | <i>MUC4</i>     | nonsynonymous SNV      | NM_018406:c.C11258T;p.A3753V          |                | chr3  | 195507193 | 195507193 | G        | A  | 0.173267327 | 0.37 | 202 | 35  |
| KYSE50 | exonic          | <i>GPR112</i>   | frameshift insertion   | NM_153834:c.7477_7478insTT;p.L2493fs  |                | chrX  | 135453567 | 135453567 | -        | TT | 0.185185185 | 0.60 | 81  | 15  |
| KYSE50 | exonic          | <i>SIPAIL2</i>  | nonsynonymous SNV      | NM_020808:c.C991T;p.H331Y             |                | chr1  | 232650095 | 232650095 | G        | A  | 0.187878788 | 0.71 | 165 | 31  |
| KYSE50 | exonic          | <i>ABHD13</i>   | nonsynonymous SNV      | NM_032859:c.C590A;p.A197E             |                | chr13 | 108882156 | 108882156 | C        | A  | 0.190140845 | 0.52 | 142 | 27  |
| KYSE50 | exonic          | <i>NALCN</i>    | nonsynonymous SNV      | NM_052867:c.G165T;p.M55I              |                | chr13 | 102047660 | 102047660 | C        | A  | 0.190789474 | 0.55 | 152 | 29  |
| KYSE50 | exonic          | <i>MED12</i>    | nonsynonymous SNV      | NM_005120:c.G908A;p.R303Q             |                | chrX  | 70341473  | 70341473  | G        | A  | 0.2         | 0.50 | 50  | 10  |
| KYSE50 | exonic          | <i>AKAP6</i>    | nonsynonymous SNV      | NM_004274:c.C593T;p.P1979S            |                | chr14 | 33292954  | 33292954  | C        | T  | 0.204379562 | 0.43 | 137 | 28  |
| KYSE50 | exonic          | <i>RECQL4</i>   | nonsynonymous SNV      | NM_004260:c.C1321T;p.P441S            |                | chr8  | 145740779 | 145740779 | G        | A  | 0.204545455 | 0.50 | 88  | 18  |
| KYSE50 | exonic          | <i>MUC4</i>     | nonsynonymous SNV      | NM_018406:c.G10201A;p.V3401I          |                | chr3  | 195508250 | 195508250 | C        | T  | 0.208955224 | 0.49 | 536 | 112 |
| KYSE50 | exonic          | <i>TTN</i>      | nonsynonymous SNV      | NM_003319:c.G20318A;p.R6773Q          |                | chr2  | 179482565 | 179482565 | C        | T  | 0.211055276 | 0.52 | 199 | 42  |
| KYSE50 | exonic          | <i>MUC4</i>     | nonsynonymous SNV      | NM_018406:c.G8775C;p.Q2925H           | 1645684        | chr3  | 195509676 | 195509676 | C        | G  | 0.222560976 | 0.60 | 328 | 73  |
| KYSE50 | exonic          | <i>TTN</i>      | stopgain SNV           | NM_003319:c.G71256A;p.W23752X         |                | chr2  | 179404341 | 179404341 | C        | T  | 0.223776224 | 0.38 | 143 | 32  |
| KYSE50 | exonic          | <i>DNAH6</i>    | nonsynonymous SNV      | NM_001370:c.C4474A;p.Q1492K           |                | chr2  | 84852146  | 84852146  | C        | A  | 0.235294118 | 0.42 | 102 | 24  |
| KYSE50 | exonic          | <i>MUC2</i>     | nonsynonymous SNV      | NM_002457:c.C4850T;p.P1617L           |                | chr11 | 1093031   | 1093031   | C        | T  | 0.24260355  | 0.61 | 169 | 41  |
| KYSE50 | splicing        | <i>PDE3B</i>    |                        |                                       |                | chr11 | 14852393  | 14852393  | G        | A  | 0.242718447 | 0.40 | 103 | 25  |
| KYSE50 | exonic          | <i>MUC4</i>     | nonsynonymous SNV      | NM_018406:c.C12622T;p.P4208S          |                | chr3  | 195505829 | 195505829 | G        | A  | 0.24742268  | 0.96 | 97  | 24  |
| KYSE50 | exonic          | <i>KCNT2</i>    | nonsynonymous SNV      | NM_198503:c.T2620A;p.L874M            |                | chr1  | 196254864 | 196254864 | A        | T  | 0.261437908 | 0.43 | 153 | 40  |
| KYSE50 | exonic          | <i>PCDH20</i>   | frameshift deletion    | NM_022843:c.1065_1066del;p.355_356del |                | chr13 | 61987166  | 61987166  | TA       | -  | 0.265306122 | 0.62 | 49  | 13  |
| KYSE50 | exonic          | <i>BRC1A</i>    | nonsynonymous SNV      | NM_007297:c.A1669G;p.K557E            |                | chr17 | 41245738  | 41245738  | T        | C  | 0.269767442 | 0.55 | 215 | 58  |
| KYSE50 | exonic          | <i>ZC3H14</i>   | stopgain SNV           | NM_207662:c.T506A;p.L169X             |                | chr14 | 89073632  | 89073632  | T        | A  | 0.29787234  | 0.50 | 94  | 28  |
| KYSE50 | exonic          | <i>C6</i>       | nonsynonymous SNV      | NM_000065:c.C1219G;p.R407G            |                | chr5  | 41172399  | 41172399  | G        | C  | 0.300518135 | 0.48 | 193 | 58  |
| KYSE50 | exonic          | <i>ZFAT</i>     | stopgain SNV           | NM_001167583:c.C143G;p.S48X           | 1560536        | chr8  | 135669821 | 135669821 | G        | C  | 0.308943089 | 0.63 | 123 | 38  |
| KYSE50 | exonic          | <i>LRRTM4</i>   | nonsynonymous SNV      | NM_001134745:c.G1668C;p.E556D         |                | chr2  | 76975926  | 76975926  | C        | G  | 0.352941176 | 0.50 | 51  | 18  |
| KYSE50 | exonic          | <i>TTC18</i>    | nonsynonymous SNV      | NM_145170:c.C1511G;p.T504R            |                | chr10 | 75059379  | 75059379  | G        | C  | 0.380597015 | 0.51 | 134 | 51  |
| KYSE50 | exonic          | <i>USP24</i>    | nonsynonymous SNV      | NM_015306:c.A4855G;p.I1619V           |                | chr1  | 55571844  | 55571844  | T        | C  | 0.407407407 | 0.64 | 162 | 66  |
| KYSE50 | exonic          | <i>CTNNA3</i>   | nonsynonymous SNV      | NM_001127384:c.A1462G;p.N488D         |                | chr10 | 68280444  | 68280444  | T        | C  | 0.408602151 | 0.50 | 93  | 38  |
| KYSE50 | exonic:splicing | <i>ABC4</i>     | nonsynonymous SNV      | NM_000443:c.T835C;p.Y279H             |                | chr7  | 87076520  | 87076520  | A        | G  | 0.413793103 | 0.36 | 203 | 84  |
| KYSE50 | exonic          | <i>KIF14</i>    | nonsynonymous SNV      | NM_014875:c.A1672G;p.T558A            |                | chr1  | 200574485 | 200574485 | T        | C  | 0.413953488 | 0.38 | 215 | 89  |
| KYSE50 | exonic          | <i>TTN</i>      | nonsynonymous SNV      | NM_003319:c.C26512T;p.R8838C          |                | chr2  | 179470315 | 179470315 | G        | A  | 0.416216216 | 0.61 | 185 | 77  |
| KYSE50 | exonic          | <i>TTC18</i>    | nonsynonymous SNV      | NM_145170:c.C595T;p.P199S             |                | chr10 | 75104837  | 75104837  | G        | A  | 0.44047619  | 0.69 | 168 | 74  |
| KYSE50 | exonic          | <i>PASD1</i>    | nonframeshift deletion | NM_173493:c.1470_1490del;p.490_497del |                | chrX  | 150840687 | 150840707 | 3CAGCGGC | -  | 0.5         | 0.83 | 12  | 6   |
| KYSE50 | exonic          | <i>MTERFD1</i>  | stoploss SNV           | NM_015942:c.T1252C;p.X418Q            |                | chr8  | 97251721  | 97251721  | A        | G  | 0.553030303 | 0.66 | 132 | 73  |
| KYSE50 | exonic          | <i>C10orf71</i> | nonsynonymous SNV      | NM_001135196:c.A1334G;p.K445R         |                | chr10 | 50531924  | 50531924  | A        | G  | 0.587837838 | 0.44 | 148 | 87  |
| KYSE50 | exonic          | <i>LRRC15</i>   | nonsynonymous SNV      | NM_130830:c.C305T;p.S102L             |                | chr3  | 194081468 | 194081468 | G        | A  | 0.591836735 | 0.36 | 98  | 58  |
| KYSE50 | exonic          | <i>MUC2</i>     | nonsynonymous SNV      | NM_002457:c.G4534A;p.A1512T           |                | chr11 | 1092715   | 1092715   | G        | A  | 0.6         | 0.57 | 50  | 30  |
| KYSE50 | exonic          | <i>OXR1</i>     | nonsynonymous SNV      | NM_181354:c.G104A;p.R35H              |                | chr8  | 107670318 | 107670318 | G        | A  | 0.666666667 | 0.64 | 21  | 14  |
| KYSE50 | exonic          | <i>BAP1</i>     | frameshift deletion    | NM_004656:c.1120_1126del;p.374_376del |                | chr3  | 52438593  | 52438599  | CTTCTC   | -  | 0.692307692 | 0.66 | 26  | 18  |
| KYSE50 | exonic          | <i>ZFH3</i>     | nonsynonymous SNV      | NM_006885:c.G359A;p.G120E             |                | chr16 | 72993686  | 72993686  | C        | T  | 0.695652174 | 0.44 | 23  | 16  |
| KYSE50 | exonic          | <i>MUC4</i>     | nonsynonymous SNV      | NM_018406:c.C11511G;p.H3837Q          |                | chr3  | 195506940 | 195506940 | G        | C  | 0.722222222 | 0.62 | 18  | 13  |
| KYSE50 | exonic          | <i>MUC4</i>     | nonsynonymous SNV      | NM_018406:c.C11468T;p.T3823I          |                | chr3  | 195506983 | 195506983 | G        | A  | 0.732142857 | 0.39 | 56  | 41  |
| KYSE50 | exonic          | <i>MED12</i>    | nonsynonymous SNV      | NM_005120:c.C4574A;p.P1525Q           |                | chrX  | 70353019  | 70353019  | C        | A  | 1           | 0.50 | 102 | 102 |
| KYSE50 | exonic          | <i>RP1</i>      | nonsynonymous SNV      | NM_006269:c.C6036A;p.F2012L           |                | chr8  | 55542478  | 55542478  | C        | A  | 1           | 0.63 | 119 | 119 |

|        |                 |                |                         |                                                   |               |       |           |           |   |         |             |      |     |    |
|--------|-----------------|----------------|-------------------------|---------------------------------------------------|---------------|-------|-----------|-----------|---|---------|-------------|------|-----|----|
| KYSE50 | exonic          | <i>SEN3</i>    | nonsynonymous SNV       | NM_015670:c.A1277G:p.N426S                        |               | chr17 | 7470257   | 7470257   | A | G       | 1           | 0.59 | 88  | 88 |
| KYSE50 | exonic          | <i>TP53</i>    | stopgain SNV            | NM_001126118:c.A184T:p.K62X                       | 9672;1365415; | chr17 | 7579386   | 7579386   | T | A       | 1           | 0.33 | 49  | 49 |
| KYSE50 | exonic          | <i>USP26</i>   | nonsynonymous SNV       | NM_031907:c.A269C:p.D90A                          |               | chrX  | 132161980 | 132161980 | T | G       | 1           | 0.62 | 65  | 65 |
| KYSE70 | exonic          | <i>MUC6</i>    | nonsynonymous SNV       | NM_005961:c.C5912T:p.P1971L                       |               | chr11 | 1016889   | 1016889   | G | A       | 0.088757396 | 0.33 | 338 | 30 |
| KYSE70 | exonic          | <i>FAT2</i>    | nonsynonymous SNV       | NM_001447:c.T5291G:p.V1764G                       |               | chr5  | 150925397 | 150925397 | A | C       | 0.094017094 | 0.45 | 117 | 11 |
| KYSE70 | exonic          | <i>MUC2</i>    | nonsynonymous SNV       | NM_002457:c.C4703T:p.T1568M                       |               | chr11 | 1092884   | 1092884   | C | T       | 0.099706745 | 0.65 | 341 | 34 |
| KYSE70 | exonic          | <i>MUC4</i>    | nonsynonymous SNV       | NM_018406:c.G8775C:p.Q2925H                       | 1645684       | chr3  | 195509676 | 195509676 | C | G       | 0.107954545 | 0.63 | 176 | 19 |
| KYSE70 | exonic          | <i>PDE6C</i>   | nonsynonymous SNV       | NM_006204:c.G1522A:p.E508K                        |               | chr10 | 95399866  | 95399866  | G | A       | 0.111111111 | 0.56 | 162 | 18 |
| KYSE70 | exonic          | <i>YME1L1</i>  | nonsynonymous SNV       | NM_001253866:c.C43T:p.P15S                        |               | chr10 | 27437960  | 27437960  | G | A       | 0.111607143 | 0.16 | 224 | 25 |
| KYSE70 | exonic          | <i>ZNF717</i>  | nonsynonymous SNV       | NM_001128223:c.G2703C:p.E901D                     |               | chr3  | 75786071  | 75786071  | C | G       | 0.113636364 | 0.90 | 88  | 10 |
| KYSE70 | exonic          | <i>YSK4</i>    | nonsynonymous SNV       | NM_025052:c.G697C:p.E233Q                         |               | chr2  | 135745745 | 135745745 | C | G       | 0.120300752 | 0.75 | 133 | 16 |
| KYSE70 | exonic          | <i>ATM</i>     | nonsynonymous SNV       | NM_000051:c.C6166T:p.P2056S                       |               | chr11 | 108186808 | 108186808 | C | T       | 0.126436782 | 0.36 | 174 | 22 |
| KYSE70 | exonic          | <i>ZNF717</i>  | nonsynonymous SNV       | NM_001128223:c.T2614G:p.C872G                     |               | chr3  | 75786160  | 75786160  | A | C       | 0.129213483 | 0.57 | 178 | 23 |
| KYSE70 | exonic          | <i>MUC2</i>    | nonsynonymous SNV       | NM_002457:c.A4678C:p.T1560P                       |               | chr11 | 1092859   | 1092859   | A | C       | 0.129277567 | 0.76 | 263 | 34 |
| KYSE70 | exonic          | <i>MUC4</i>    | nonsynonymous SNV       | NM_018406:c.C4846T:p.P1616S                       |               | chr3  | 195513605 | 195513605 | G | A       | 0.135338346 | 0.50 | 266 | 36 |
| KYSE70 | exonic          | <i>ZNF717</i>  | nonsynonymous SNV       | NM_001128223:c.A1952T:p.E651V                     | 1558609       | chr3  | 75786822  | 75786822  | T | A       | 0.136363636 | 0.50 | 44  | 6  |
| KYSE70 | exonic          | <i>MUC4</i>    | nonsynonymous SNV       | NM_018406:c.C8282T:p.A2761V                       |               | chr3  | 195510169 | 195510169 | G | A       | 0.138888889 | 0.80 | 108 | 15 |
| KYSE70 | exonic          | <i>SLCO1C1</i> | nonsynonymous SNV       | NM_001149544:c.C569G:p.S190C                      |               | chr12 | 20874885  | 20874885  | C | G       | 0.141732283 | 0.39 | 127 | 18 |
| KYSE70 | exonic          | <i>MUC6</i>    | nonsynonymous SNV       | NM_005961:c.C4889T:p.T1630I                       |               | chr11 | 1017912   | 1017912   | G | A       | 0.151020408 | 0.46 | 245 | 37 |
| KYSE70 | exonic          | <i>PRDM9</i>   | nonsynonymous SNV       | NM_020227:c.T2379A:p.S793R                        |               | chr5  | 23527576  | 23527576  | T | A       | 0.151515152 | 0.70 | 132 | 20 |
| KYSE70 | exonic          | <i>FSIP2</i>   | nonsynonymous SNV       | NM_173651:c.A5475C:p.K1825N                       |               | chr2  | 186657071 | 186657071 | A | C       | 0.166666667 | 0.33 | 72  | 12 |
| KYSE70 | exonic          | <i>MUC4</i>    | nonsynonymous SNV       | NM_018406:c.C11468T:p.T3823I                      |               | chr3  | 195506983 | 195506983 | G | A       | 0.185185185 | 0.40 | 54  | 10 |
| KYSE70 | splicing        | <i>RICTOR</i>  |                         |                                                   |               | chr5  | 38981968  | 38981968  | C | T       | 0.197916667 | 0.74 | 96  | 19 |
| KYSE70 | exonic          | <i>MUC16</i>   | nonsynonymous SNV       | NM_024690:c.C14816T:p.S4939F                      |               | chr19 | 9072630   | 9072630   | G | A       | 0.202898551 | 0.43 | 138 | 28 |
| KYSE70 | exonic          | <i>PDZRN3</i>  | nonsynonymous SNV       | NM_015009:c.A3147T:p.K1049N                       |               | chr3  | 73432570  | 73432570  | T | A       | 0.217948718 | 0.35 | 156 | 34 |
| KYSE70 | exonic          | <i>PCLO</i>    | nonsynonymous SNV       | NM_014510:c.G5963A:p.P1988E                       |               | chr7  | 82584306  | 82584306  | C | T       | 0.223529412 | 0.50 | 170 | 38 |
| KYSE70 | exonic          | <i>MUC16</i>   | nonsynonymous SNV       | NM_024690:c.C37758A:p.N12586K                     |               | chr19 | 9018180   | 9018180   | G | T       | 0.229007634 | 0.40 | 131 | 30 |
| KYSE70 | exonic          | <i>BP1FC</i>   | nonsynonymous SNV       | NM_174932:c.T284G:p.L95W                          |               | chr22 | 32843289  | 32843289  | A | C       | 0.233766234 | 0.36 | 154 | 36 |
| KYSE70 | exonic          | <i>OTOGL</i>   | nonsynonymous SNV       | NM_173591:c.A6245G:p.E2082G                       |               | chr12 | 80760358  | 80760358  | A | G       | 0.244444444 | 0.77 | 90  | 22 |
| KYSE70 | exonic          | <i>UNC79</i>   | nonsynonymous SNV       | NM_020818:c.G3175A:p.E1059K                       |               | chr14 | 94069716  | 94069716  | G | A       | 0.248       | 0.55 | 125 | 31 |
| KYSE70 | exonic          | <i>SYNE1</i>   | nonsynonymous SNV       | NM_033071:c.T8057G:p.V2686G                       |               | chr6  | 152711556 | 152711556 | A | C       | 0.25        | 0.57 | 56  | 14 |
| KYSE70 | exonic;splicing | <i>TP53BP1</i> | nonsynonymous SNV       | NM_001141979:c.G4681A:p.G1561R                    |               | chr15 | 43712503  | 43712503  | C | T       | 0.253333333 | 0.68 | 75  | 19 |
| KYSE70 | exonic          | <i>EGFR</i>    | nonsynonymous SNV       | NM_201284:c.C2015G:p.P672R                        |               | chr7  | 55238134  | 55238134  | C | G       | 0.25974026  | 0.40 | 77  | 20 |
| KYSE70 | exonic          | <i>PCLO</i>    | nonsynonymous SNV       | NM_014510:c.C7174T:p.P2392S                       |               | chr7  | 82583095  | 82583095  | G | A       | 0.263157895 | 0.90 | 38  | 10 |
| KYSE70 | exonic          | <i>PHF17</i>   | nonsynonymous SNV       | NM_199320:c.A2192G:p.N731S                        |               | chr4  | 129793080 | 129793080 | A | G       | 0.274509804 | 0.64 | 51  | 14 |
| KYSE70 | exonic          | <i>LRRK2</i>   | nonsynonymous SNV       | NM_198578:c.C3848T:p.S1283F                       |               | chr12 | 40699657  | 40699657  | C | T       | 0.278688525 | 0.50 | 122 | 34 |
| KYSE70 | exonic          | <i>AHNAK2</i>  | nonsynonymous SNV       | NM_138420:c.G10408A:p.D3470N                      |               | chr14 | 105411380 | 105411380 | C | T       | 0.284552846 | 0.57 | 123 | 35 |
| KYSE70 | exonic          | <i>MED13</i>   | stopgain SNV            | NM_005121:c.G2829A:p.W943X                        |               | chr17 | 60061591  | 60061591  | C | T       | 0.286956522 | 0.61 | 115 | 33 |
| KYSE70 | exonic          | <i>UNC79</i>   | nonsynonymous SNV       | NM_020818:c.G3704A:p.R1235Q                       |               | chr14 | 94084548  | 94084548  | G | A       | 0.307017544 | 0.60 | 114 | 35 |
| KYSE70 | exonic;splicing | <i>TRHDE</i>   | nonsynonymous SNV       | NM_013381:c.A2333G:p.N778S                        |               | chr12 | 73012817  | 73012817  | A | G       | 0.307692308 | 0.50 | 26  | 8  |
| KYSE70 | exonic          | <i>PLSCR2</i>  | nonsynonymous SNV       | NM_001199979:c.C220G:p.P74A                       |               | chr3  | 146177679 | 146177679 | G | C       | 0.321428571 | 0.61 | 56  | 18 |
| KYSE70 | exonic          | <i>TTN</i>     | nonsynonymous SNV       | NM_003319:c.C38147G:p.P12716R                     |               | chr2  | 179448567 | 179448567 | G | C       | 0.328125    | 0.57 | 64  | 21 |
| KYSE70 | exonic          | <i>CACNA1B</i> | nonsynonymous SNV       | NM_000718:c.G5147:p.V172L                         |               | chr9  | 140777319 | 140777319 | G | T       | 0.329411765 | 0.43 | 85  | 28 |
| KYSE70 | splicing        | <i>LAMA2</i>   |                         |                                                   |               | chr6  | 129641682 | 129641682 | G | A       | 0.342105263 | 0.85 | 76  | 26 |
| KYSE70 | exonic          | <i>TTN</i>     | nonsynonymous SNV       | NM_003319:c.G1934A:p.G645E                        |               | chr2  | 179654091 | 179654091 | C | T       | 0.349056604 | 0.51 | 106 | 37 |
| KYSE70 | exonic          | <i>TP53</i>    | nonsynonymous SNV       | NM_001126118:c.G243T:p.K81N                       | 9707;946371;1 | chr17 | 7579327   | 7579327   | C | A       | 0.355555556 | 0.59 | 90  | 32 |
| KYSE70 | exonic          | <i>CWF19L2</i> | nonsynonymous SNV       | NM_152434:c.G1654A:p.D552N                        |               | chr11 | 107263585 | 107263585 | C | T       | 0.355932203 | 0.38 | 236 | 84 |
| KYSE70 | exonic          | <i>FH</i>      | nonsynonymous SNV       | NM_000143:c.C574T:p.P192S                         |               | chr1  | 241672067 | 241672067 | G | A       | 0.358208955 | 0.42 | 67  | 24 |
| KYSE70 | exonic          | <i>USH2A</i>   | nonsynonymous SNV       | NM_206933:c.A6584G:p.N2195S                       |               | chr1  | 216172302 | 216172302 | T | C       | 0.358974359 | 0.71 | 117 | 42 |
| KYSE70 | exonic          | <i>DSPP</i>    | nonframeshift insertion | NM_014208:c.2643_2644insAGTAGTGAC;p.D881delinsDSS | 1474924       | chr4  | 88536457  | 88536457  | - | GTAGTGA | 0.363636364 | 0.50 | 66  | 24 |
| KYSE70 | exonic          | <i>EGFR</i>    | frameshift deletion     | NM_005228:c.203delC;p.T68fs                       |               | chr7  | 55210093  | 55210093  | C | -       | 0.36809816  | 0.43 | 163 | 60 |
| KYSE70 | exonic          | <i>IQUB</i>    | stopgain SNV            | NM_178827:c.T1082G:p.L361X                        |               | chr7  | 123136902 | 123136902 | A | C       | 0.369863014 | 0.52 | 146 | 54 |
| KYSE70 | exonic          | <i>RICTOR</i>  | nonsynonymous SNV       | NM_152756:c.T4562C:p.L1521P                       |               | chr5  | 38945664  | 38945664  | A | G       | 0.371584699 | 0.54 | 183 | 68 |
| KYSE70 | exonic          | <i>NALCN</i>   | stopgain SNV            | NM_052867:c.C3541T:p.R1181X                       |               | chr13 | 101736104 | 101736104 | G | A       | 0.379746835 | 0.47 | 79  | 30 |
| KYSE70 | exonic          | <i>MGAT5</i>   | nonsynonymous SNV       | NM_002410:c.G1828A:p.E610K                        |               | chr2  | 135185969 | 135185969 | G | A       | 0.386554622 | 0.57 | 119 | 46 |
| KYSE70 | exonic          | <i>EPHA4</i>   | nonsynonymous SNV       | NM_004438:c.C872A:p.A291D                         |               | chr2  | 222365844 | 222365844 | G | T       | 0.419354839 | 0.46 | 31  | 13 |
| KYSE70 | exonic          | <i>EPHA7</i>   | nonsynonymous SNV       | NM_004440:c.G350A:p.G117E                         |               | chr6  | 94120701  | 94120701  | C | T       | 0.420560748 | 0.67 | 107 | 45 |
| KYSE70 | exonic          | <i>KIT</i>     | nonsynonymous SNV       | NM_000222:c.G2335T:p.G779C                        |               | chr4  | 55598138  | 55598138  | G | T       | 0.421875    | 0.41 | 64  | 27 |



|         |          |                |                      |                                                       |                |       |           |           |   |         |             |      |     |     |
|---------|----------|----------------|----------------------|-------------------------------------------------------|----------------|-------|-----------|-----------|---|---------|-------------|------|-----|-----|
| KYSE70  | exonic   | <i>LRP1</i>    | nonsynonymous SNV    | NM_002332:c.C11701T;p.R3901C                          |                | chr12 | 57600366  | 57600366  | C | T       | 0.43055556  | 0.35 | 72  | 31  |
| KYSE70  | exonic   | <i>DNAH5</i>   | nonsynonymous SNV    | NM_001369:c.G4139A;p.R1380Q                           |                | chr5  | 13865993  | 13865993  | C | T       | 0.430769231 | 0.32 | 65  | 28  |
| KYSE70  | exonic   | <i>ZNF98</i>   | nonsynonymous SNV    | NM_001098626:c.A1331G;p.N444S                         |                | chr19 | 22574706  | 22574706  | T | C       | 0.434782609 | 0.40 | 23  | 10  |
| KYSE70  | exonic   | <i>VPS13B</i>  | nonsynonymous SNV    | NM_015243:c.C2336A;p.T779N                            |                | chr8  | 100205106 | 100205106 | C | A       | 0.440860215 | 0.73 | 93  | 41  |
| KYSE70  | exonic   | <i>TP53</i>    | frameshift insertion | NM_001126115:c.356_357insA;p.I119fs                   | 9756;946371;1  | chr17 | 7577529   | 7577529   | - | T       | 0.46875     | 0.67 | 32  | 15  |
| KYSE70  | exonic   | <i>RP1</i>     | frameshift deletion  | NM_006269:c.403delG;p.A135fs                          |                | chr8  | 55533929  | 55533929  | G | -       | 0.538461538 | 0.43 | 13  | 7   |
| KYSE70  | exonic   | <i>PCDH11X</i> | nonsynonymous SNV    | NM_001168360:c.A2108C;p.N703T                         |                | chrX  | 91133347  | 91133347  | A | C       | 0.586206897 | 0.12 | 29  | 17  |
| KYSE70  | exonic   | <i>MYH8</i>    | nonsynonymous SNV    | NM_002472:c.A3145G;p.M1049V                           |                | chr17 | 10304472  | 10304472  | T | C       | 0.590163934 | 0.36 | 122 | 72  |
| KYSE70  | exonic   | <i>MUC4</i>    | nonsynonymous SNV    | NM_018406:c.T11882C;p.V3961A                          |                | chr3  | 195506569 | 195506569 | A | G       | 0.59375     | 0.42 | 32  | 19  |
| KYSE70  | exonic   | <i>CC2D2B</i>  | nonsynonymous SNV    | NM_001001732:c.G194A;p.R65Q                           |                | chr10 | 97772362  | 97772362  | G | A       | 0.621621622 | 0.52 | 148 | 92  |
| KYSE70  | exonic   | <i>AHNAK2</i>  | nonsynonymous SNV    | NM_138420:c.C6121G;p.P2041A                           |                | chr14 | 105415667 | 105415667 | G | C       | 0.629213483 | 0.63 | 89  | 56  |
| KYSE70  | exonic   | <i>RP1</i>     | nonsynonymous SNV    | NM_006269:c.C404T;p.A135V                             | 1473090        | chr8  | 55533930  | 55533930  | C | T       | 0.636363636 | 0.43 | 11  | 7   |
| KYSE70  | exonic   | <i>AHNAK2</i>  | nonsynonymous SNV    | NM_138420:c.A3044G;p.K1015R                           |                | chr14 | 105418744 | 105418744 | T | C       | 0.648648649 | 0.50 | 111 | 72  |
| KYSE70  | exonic   | <i>MGAM</i>    | nonsynonymous SNV    | NM_004668:c.A1040T;p.D347V                            |                | chr7  | 141726972 | 141726972 | A | T       | 0.681818182 | 0.50 | 198 | 135 |
| KYSE70  | exonic   | <i>MYO3A</i>   | nonsynonymous SNV    | NM_017433:c.C541A;p.R181S                             |                | chr10 | 26305781  | 26305781  | C | A       | 0.733333333 | 0.55 | 420 | 308 |
| KYSE70  | exonic   | <i>MUC2</i>    | nonsynonymous SNV    | NM_002457:c.G4534A;p.A1512T                           |                | chr11 | 1092715   | 1092715   | G | A       | 0.75        | 0.64 | 44  | 33  |
| KYSE70  | exonic   | <i>MAP1S</i>   | nonsynonymous SNV    | NM_018174:c.G1618A;p.E540K                            |                | chr19 | 17837811  | 17837811  | G | A       | 0.76        | 0.37 | 25  | 19  |
| KYSE70  | exonic   | <i>CGN</i>     | nonsynonymous SNV    | NM_020770:c.C2488T;p.R830W                            |                | chr1  | 151503139 | 151503139 | C | T       | 0.785714286 | 0.36 | 14  | 11  |
| KYSE70  | exonic   | <i>ZSCAN18</i> | nonsynonymous SNV    | NM_001145542:c.G56C;p.W19S                            |                | chr19 | 58601747  | 58601747  | C | G       | 0.785714286 | 0.45 | 14  | 11  |
| KYSE70  | exonic   | <i>OBSCN</i>   | nonsynonymous SNV    | NM_001098623:c.C2270T;p.S757L                         |                | chr1  | 228404296 | 228404296 | C | T       | 0.8         | 0.67 | 15  | 12  |
| KYSE70  | exonic   | <i>OBSCN</i>   | stopgain SNV         | NM_001098623:c.C1791T;p.Q5973X                        |                | chr1  | 228529198 | 228529198 | C | T       | 0.826086957 | 0.32 | 23  | 19  |
| KYSE70  | exonic   | <i>PIK3CA</i>  | stoploss SNV         | NM_006218:c.A3207G;p.X1069W                           | 73758;1493699  | chr3  | 178952152 | 178952152 | A | G       | 0.832518337 | 0.41 | 818 | 681 |
| KYSE70  | exonic   | <i>LAMA2</i>   | stopgain SNV         | NM_000426:c.T389G;p.L130X                             |                | chr6  | 129381034 | 129381034 | T | G       | 0.986486486 | 0.18 | 74  | 73  |
| KYSE70  | exonic   | <i>DPCR1</i>   | nonsynonymous SNV    | NM_080870:c.G3025A;p.A1009T                           |                | chr6  | 30919266  | 30919266  | G | A       | 0.988235294 | 0.50 | 85  | 84  |
| KYSE70  | exonic   | <i>TIN</i>     | nonsynonymous SNV    | NM_133378:c.C15731G;p.T5244S                          |                | chr2  | 179593088 | 179593088 | G | C       | 0.990740741 | 0.50 | 108 | 107 |
| KYSE70  | exonic   | <i>ARID1A</i>  | stopgain SNV         | NM_006015:c.C5965T;p.R1989X                           | 450048;158208  | chr1  | 27106354  | 27106354  | C | T       | 1           | 0.44 | 39  | 39  |
| KYSE70  | exonic   | <i>DMD</i>     | nonsynonymous SNV    | NM_004007:c.A3203G;p.D1068G                           |                | chrX  | 32472810  | 32472810  | T | C       | 1           | 0.69 | 61  | 61  |
| KYSE70  | exonic   | <i>NFE2L2</i>  | nonsynonymous SNV    | NM_001145412:c.G24T;p.W8C                             | 571905;158098  | chr2  | 178098973 | 178098973 | C | A       | 1           | 0.55 | 80  | 80  |
| KYSE70  | exonic   | <i>PLEC</i>    | nonsynonymous SNV    | NM_201378:c.A12571G;p.I4191V                          |                | chr8  | 144991376 | 144991376 | T | C       | 1           | 0.58 | 19  | 19  |
| KYSE70  | exonic   | <i>UNC80</i>   | nonsynonymous SNV    | NM_032504:c.A3434G;p.E1145G                           |                | chr2  | 210707144 | 210707144 | A | G       | 1           | 0.34 | 74  | 74  |
| KYSE110 | exonic   | <i>MUC2</i>    | nonsynonymous SNV    | NM_002457:c.C4679T;p.T1560M                           |                | chr11 | 1092860   | 1092860   | C | T       | 0.082901554 | 0.81 | 193 | 16  |
| KYSE110 | exonic   | <i>MUC2</i>    | nonsynonymous SNV    | NM_002457:c.T4747A;p.S1583T                           |                | chr11 | 1092928   | 1092928   | T | A       | 0.084337349 | 0.71 | 166 | 14  |
| KYSE110 | exonic   | <i>MUC2</i>    | nonsynonymous SNV    | NM_002457:c.C5114T;p.T1705I                           |                | chr11 | 1093295   | 1093295   | C | T       | 0.099009901 | 0.80 | 101 | 10  |
| KYSE110 | exonic   | <i>MUC4</i>    | nonsynonymous SNV    | NM_018406:c.T8572C;p.S2858P                           |                | chr3  | 195509879 | 195509879 | A | G       | 0.103448276 | 0.83 | 174 | 18  |
| KYSE110 | exonic   | <i>MUC4</i>    | nonsynonymous SNV    | NM_018406:c.G8775C;p.Q2925H                           | 1645684        | chr3  | 195509676 | 195509676 | C | G       | 0.104294479 | 0.71 | 163 | 17  |
| KYSE110 | exonic   | <i>MUC2</i>    | nonsynonymous SNV    | NM_002457:c.C4703T;p.T1568M                           |                | chr11 | 1092884   | 1092884   | C | T       | 0.10483871  | 0.62 | 248 | 26  |
| KYSE110 | exonic   | <i>MUC4</i>    | nonsynonymous SNV    | NM_018406:c.G4936A;p.A1646T                           | 1645683        | chr3  | 195513515 | 195513515 | C | T       | 0.105263158 | 0.91 | 209 | 22  |
| KYSE110 | exonic   | <i>MUC4</i>    | nonsynonymous SNV    | NM_018406:c.T332A;p.M111K                             |                | chr3  | 195518119 | 195518119 | A | T       | 0.105263158 | 0.64 | 133 | 14  |
| KYSE110 | exonic   | <i>FAM184A</i> | nonsynonymous SNV    | NM_024581:c.A269G;p.K90R                              |                | chr6  | 119345869 | 119345869 | T | C       | 0.106382979 | 0.40 | 94  | 10  |
| KYSE110 | exonic   | <i>ZNF717</i>  | nonsynonymous SNV    | NM_001128223:c.A1948G;p.N650D                         | 1558609        | chr3  | 75786826  | 75786826  | T | C       | 0.107142857 | 0.33 | 56  | 6   |
| KYSE110 | exonic   | <i>ZNF717</i>  | nonsynonymous SNV    | NM_001128223:c.A1952T;p.E651V                         | 1558609        | chr3  | 75786822  | 75786822  | T | A       | 0.109090909 | 0.67 | 55  | 6   |
| KYSE110 | exonic   | <i>MUC4</i>    | nonsynonymous SNV    | NM_018406:c.C11258T;p.A3753V                          |                | chr3  | 195507193 | 195507193 | G | A       | 0.109589041 | 0.50 | 146 | 16  |
| KYSE110 | exonic   | <i>MUC4</i>    | nonsynonymous SNV    | NM_018406:c.G2992A;p.A998T                            |                | chr3  | 195515459 | 195515459 | C | T       | 0.112359551 | 0.50 | 89  | 10  |
| KYSE110 | splicing | <i>ZSCAN18</i> |                      |                                                       |                | chr19 | 58597539  | 58597539  | A | T       | 0.112676056 | 0.88 | 71  | 8   |
| KYSE110 | exonic   | <i>RALGAPB</i> | nonsynonymous SNV    | NM_020336:c.C1702T;p.P568S                            |                | chr20 | 37153503  | 37153503  | C | T       | 0.114942529 | 0.40 | 87  | 10  |
| KYSE110 | exonic   | <i>ZNF717</i>  | nonsynonymous SNV    | NM_001128223:c.A973G;p.S325G                          |                | chr3  | 75787801  | 75787801  | T | C       | 0.132420091 | 0.90 | 219 | 29  |
| KYSE110 | exonic   | <i>USH2A</i>   | nonsynonymous SNV    | NM_007123:c.G399T;p.K133N                             |                | chr1  | 216595280 | 216595280 | C | A       | 0.13253012  | 0.27 | 83  | 11  |
| KYSE110 | exonic   | <i>WDR64</i>   | nonsynonymous SNV    | NM_144625:c.G1786T;p.D596Y                            |                | chr1  | 241920630 | 241920630 | G | T       | 0.142857143 | 0.36 | 98  | 14  |
| KYSE110 | exonic   | <i>TACC2</i>   | nonsynonymous SNV    | NM_006997:c.C1190T;p.P397L                            |                | chr10 | 123970896 | 123970896 | C | T       | 0.146341463 | 0.58 | 82  | 12  |
| KYSE110 | exonic   | <i>MUC4</i>    | nonsynonymous SNV    | NM_018406:c.A3037G;p.S1013G                           | 581;1645683;16 | chr3  | 195515414 | 195515414 | T | C       | 0.150442478 | 0.47 | 113 | 17  |
| KYSE110 | exonic   | <i>ZNF717</i>  | nonsynonymous SNV    | NM_001128223:c.G2703C;p.E901D                         |                | chr3  | 75786071  | 75786071  | C | G       | 0.152542373 | 0.83 | 118 | 18  |
| KYSE110 | exonic   | <i>DNAH6</i>   | nonsynonymous SNV    | NM_001370:c.A1916G;p.Q639R                            |                | chr2  | 84800703  | 84800703  | A | G       | 0.152777778 | 0.61 | 216 | 33  |
| KYSE110 | exonic   | <i>ZNF717</i>  | stopgain SNV         | NM_001128223:c.1730_1731insAAGTCAT;p.F577_L578delinsX |                | chr3  | 75787044  | 75787044  | - | ATGACTT | 0.153409091 | 0.30 | 176 | 27  |
| KYSE110 | exonic   | <i>DNAH8</i>   | nonsynonymous SNV    | NM_001206927:c.G9473A;p.R3158K                        |                | chr6  | 38875856  | 38875856  | G | A       | 0.155172414 | 0.11 | 116 | 18  |
| KYSE110 | exonic   | <i>MUC6</i>    | nonsynonymous SNV    | NM_005961:c.C5494T;p.P1832S                           |                | chr11 | 1017307   | 1017307   | G | A       | 0.156626506 | 0.69 | 83  | 13  |
| KYSE110 | exonic   | <i>EP300</i>   | nonsynonymous SNV    | NM_001429:c.C4858T;p.P1620S                           |                | chr22 | 41572329  | 41572329  | C | T       | 0.161538462 | 0.29 | 130 | 21  |
| KYSE110 | exonic   | <i>EPPK1</i>   | nonsynonymous SNV    | NM_031308:c.G7132C;p.D2378H                           |                | chr8  | 144940290 | 144940290 | C | G       | 0.180124224 | 0.59 | 161 | 29  |
| KYSE110 | exonic   | <i>LRRK2</i>   | nonsynonymous SNV    | NM_198578:c.T6555A;p.N2185K                           |                | chr12 | 40745514  | 40745514  | T | A       | 0.189189189 | 0.14 | 111 | 21  |

|         |          |                |                     |                                |       |           |           |   |   |             |      |     |    |
|---------|----------|----------------|---------------------|--------------------------------|-------|-----------|-----------|---|---|-------------|------|-----|----|
| KYSE110 | exonic   | <i>ANAPC5</i>  | nonsynonymous SNV   | NM_001137559:c.A1202C:p.K401T  | chr12 | 121757599 | 121757599 | T | G | 0.190140845 | 0.48 | 142 | 27 |
| KYSE110 | exonic   | <i>MUC6</i>    | nonsynonymous SNV   | NM_005961:c.C5132A:p.T1711N    | chr11 | 1017669   | 1017669   | G | T | 0.192       | 0.25 | 125 | 24 |
| KYSE110 | exonic   | <i>MLLT10</i>  | nonsynonymous SNV   | NM_001195626:c.A584C:p.K195T   | chr10 | 21903834  | 21903834  | A | C | 0.198630137 | 0.34 | 146 | 29 |
| KYSE110 | exonic   | <i>ORSK3</i>   | nonsynonymous SNV   | NM_001005516:c.A269T:p.K901    | chr3  | 98109778  | 98109778  | A | T | 0.202970297 | 0.49 | 202 | 41 |
| KYSE110 | exonic   | <i>DNAH8</i>   | nonsynonymous SNV   | NM_001206927:c.G6242A:p.G2081E | chr6  | 38830166  | 38830166  | G | A | 0.205673759 | 0.55 | 141 | 29 |
| KYSE110 | exonic   | <i>ANK2</i>    | nonsynonymous SNV   | NM_001148:c.C9821T:p.P3274L    | chr4  | 114279595 | 114279595 | C | T | 0.212962963 | 0.35 | 108 | 23 |
| KYSE110 | exonic   | <i>MC2R</i>    | nonsynonymous SNV   | NM_000529:c.T886C:p.Y296H      | chr18 | 13884632  | 13884632  | A | G | 0.218181818 | 0.58 | 55  | 12 |
| KYSE110 | exonic   | <i>TTN</i>     | nonsynonymous SNV   | NM_003319:c.G73787A:p.R24596K  | chr2  | 179400360 | 179400360 | C | T | 0.223684211 | 0.59 | 76  | 17 |
| KYSE110 | exonic   | <i>FN1</i>     | nonsynonymous SNV   | NM_054034:c.C1955T:p.P652L     | chr2  | 216279546 | 216279546 | G | A | 0.228915663 | 0.68 | 83  | 19 |
| KYSE110 | exonic   | <i>HPS5</i>    | frameshift deletion | NM_007216:c.280delT:p.W94fs    | chr11 | 18327884  | 18327884  | A | - | 0.235294118 | 0.08 | 51  | 12 |
| KYSE110 | exonic   | <i>SAMD9L</i>  | nonsynonymous SNV   | NM_152703:c.G4309C:p.E1437Q    | chr7  | 92760976  | 92760976  | C | G | 0.237373737 | 0.47 | 198 | 47 |
| KYSE110 | exonic   | <i>TTN</i>     | nonsynonymous SNV   | NM_003319:c.A38591G:p.K12864R  | chr2  | 179447744 | 179447744 | T | C | 0.240740741 | 0.46 | 108 | 26 |
| KYSE110 | exonic   | <i>TG</i>      | nonsynonymous SNV   | NM_003235:c.G904A:p.E302K      | chr8  | 133895073 | 133895073 | G | A | 0.244897959 | 0.50 | 49  | 12 |
| KYSE110 | exonic   | <i>MKRN3</i>   | nonsynonymous SNV   | NM_005664:c.C899G:p.S300W      | chr15 | 23811828  | 23811828  | C | G | 0.25        | 0.56 | 64  | 16 |
| KYSE110 | exonic   | <i>TTN</i>     | nonsynonymous SNV   | NM_003319:c.G46204A:p.G15402R  | chr2  | 179437460 | 179437460 | C | T | 0.252873563 | 0.59 | 87  | 22 |
| KYSE110 | splicing | <i>RNF213</i>  |                     |                                | chr17 | 78286810  | 78286810  | A | G | 0.260869565 | 0.72 | 69  | 18 |
| KYSE110 | exonic   | <i>ERBB2</i>   | nonsynonymous SNV   | NM_004448:c.G2260A:p.V754M     | chr17 | 37880216  | 37880216  | G | A | 0.262626263 | 0.46 | 99  | 26 |
| KYSE110 | exonic   | <i>ZFP42</i>   | nonsynonymous SNV   | NM_174900:c.C419T:p.S140L      | chr4  | 188924380 | 188924380 | C | T | 0.265486726 | 0.50 | 113 | 30 |
| KYSE110 | exonic   | <i>VSIG8</i>   | nonsynonymous SNV   | NM_001013661:c.A331G:p.I111V   | chr1  | 159827979 | 159827979 | T | C | 0.266666667 | 0.38 | 60  | 16 |
| KYSE110 | exonic   | <i>UNC79</i>   | nonsynonymous SNV   | NM_020818:c.G4709A:p.R1570Q    | chr14 | 94088819  | 94088819  | G | A | 0.269230769 | 0.57 | 52  | 14 |
| KYSE110 | exonic   | <i>VCP11</i>   | nonsynonymous SNV   | NM_025054:c.G2506A:p.E836K     | chr8  | 67576688  | 67576688  | C | T | 0.274336283 | 0.55 | 113 | 31 |
| KYSE110 | exonic   | <i>THPO</i>    | nonsynonymous SNV   | NM_000460:c.G844A:p.G282S      | chr3  | 184090519 | 184090519 | C | T | 0.274509804 | 0.57 | 51  | 14 |
| KYSE110 | exonic   | <i>OSCP1</i>   | nonsynonymous SNV   | NM_145047:c.C386T:p.S129F      | chr1  | 36898072  | 36898072  | G | A | 0.279569892 | 0.62 | 93  | 26 |
| KYSE110 | exonic   | <i>TTN</i>     | nonsynonymous SNV   | NM_003319:c.G10590T:p.M3530I   | chr2  | 179606281 | 179606281 | C | A | 0.281879195 | 0.60 | 149 | 42 |
| KYSE110 | exonic   | <i>CSMD3</i>   | nonsynonymous SNV   | NM_052900:c.T9239G:p.F3080C    | chr8  | 113275984 | 113275984 | A | C | 0.284313725 | 0.48 | 102 | 29 |
| KYSE110 | splicing | <i>OTOGL</i>   |                     |                                | chr12 | 80735727  | 80735727  | G | A | 0.287234043 | 0.78 | 94  | 27 |
| KYSE110 | exonic   | <i>ZNF761</i>  | nonsynonymous SNV   | NM_001008401:c.C446T:p.P149L   | chr19 | 53958207  | 53958207  | C | T | 0.293103448 | 0.47 | 116 | 34 |
| KYSE110 | exonic   | <i>TTN</i>     | nonsynonymous SNV   | NM_133378:c.A17919T:p.Q5973H   | chr2  | 179588176 | 179588176 | T | A | 0.297297297 | 0.45 | 111 | 33 |
| KYSE110 | exonic   | <i>BCL9</i>    | nonsynonymous SNV   | NM_004326:c.A2467C:p.N823H     | chr1  | 147092428 | 147092428 | A | C | 0.29787234  | 0.79 | 47  | 14 |
| KYSE110 | exonic   | <i>PALB2</i>   | nonsynonymous SNV   | NM_024675:c.G265C:p.D89H       | chr16 | 23647602  | 23647602  | C | G | 0.315789474 | 0.17 | 38  | 12 |
| KYSE110 | exonic   | <i>SPEN</i>    | nonsynonymous SNV   | NM_015001:c.C4980A:p.D1660E    | chr1  | 16257715  | 16257715  | C | A | 0.320754717 | 0.47 | 53  | 17 |
| KYSE110 | exonic   | <i>CRB1</i>    | nonsynonymous SNV   | NM_001193640:c.A563G:p.D188G   | chr1  | 197298044 | 197298044 | A | G | 0.333333333 | 0.48 | 87  | 29 |
| KYSE110 | exonic   | <i>DMXL2</i>   | nonsynonymous SNV   | NM_001174116:c.C3011T:p.S1004L | chr15 | 51792410  | 51792410  | G | A | 0.339805825 | 0.26 | 103 | 35 |
| KYSE110 | exonic   | <i>KBTBD12</i> | nonsynonymous SNV   | NM_207335:c.T1232C:p.V411A     | chr3  | 127646768 | 127646768 | T | C | 0.342281879 | 0.45 | 149 | 51 |
| KYSE110 | exonic   | <i>GPR98</i>   | nonsynonymous SNV   | NM_032119:c.C3649A:p.P1217T    | chr5  | 89949040  | 89949040  | C | A | 0.343137255 | 0.74 | 102 | 35 |
| KYSE110 | exonic   | <i>GTF3C4</i>  | nonsynonymous SNV   | NM_012204:c.G1155C:p.K385N     | chr9  | 135554161 | 135554161 | G | C | 0.348214286 | 0.38 | 112 | 39 |
| KYSE110 | exonic   | <i>TTN</i>     | nonsynonymous SNV   | NM_003319:c.C49771T:p.H16591Y  | chr2  | 179433893 | 179433893 | G | A | 0.35        | 0.49 | 140 | 49 |
| KYSE110 | exonic   | <i>TTN</i>     | nonsynonymous SNV   | NM_003319:c.G24794C:p.G8265A   | chr2  | 179474048 | 179474048 | C | G | 0.352272727 | 0.48 | 88  | 31 |
| KYSE110 | exonic   | <i>CYP7B1</i>  | nonsynonymous SNV   | NM_004820:c.T1220C:p.F407S     | chr8  | 65517252  | 65517252  | A | G | 0.354166667 | 0.76 | 96  | 34 |
| KYSE110 | exonic   | <i>TTN</i>     | nonsynonymous SNV   | NM_003319:c.G15315C:p.M5105I   | chr2  | 179498716 | 179498716 | C | G | 0.358974359 | 0.54 | 156 | 56 |
| KYSE110 | exonic   | <i>MUC16</i>   | nonsynonymous SNV   | NM_024690:c.G8890C:p.G2964R    | chr19 | 9082925   | 9082925   | C | G | 0.361111111 | 0.50 | 72  | 26 |
| KYSE110 | exonic   | <i>RP1</i>     | nonsynonymous SNV   | NM_006269:c.A2612C:p.K871T     | chr8  | 55539054  | 55539054  | A | C | 0.362204724 | 0.50 | 127 | 46 |
| KYSE110 | exonic   | <i>ARID1A</i>  | frameshift deletion | NM_006015:c.5689delC:p.P1897fs | chr1  | 27106078  | 27106078  | C | - | 0.372093023 | 0.56 | 43  | 16 |
| KYSE110 | exonic   | <i>AHNAK2</i>  | nonsynonymous SNV   | NM_138420:c.G7402C:p.D2468H    | chr14 | 105414386 | 105414386 | C | G | 0.375       | 0.44 | 48  | 18 |
| KYSE110 | exonic   | <i>BRAF</i>    | nonsynonymous SNV   | NM_004333:c.A2096C:p.K699T     | chr7  | 140439643 | 140439643 | T | G | 0.375       | 0.60 | 192 | 72 |
| KYSE110 | exonic   | <i>PRDM2</i>   | nonsynonymous SNV   | NM_001007257:c.C53T:p.S18L     | chr1  | 14104946  | 14104946  | C | T | 0.377777778 | 0.35 | 45  | 17 |
| KYSE110 | exonic   | <i>FAT1</i>    | nonsynonymous SNV   | NM_005245:c.A7465C:p.S2489R    | chr4  | 187540275 | 187540275 | T | G | 0.382978723 | 0.56 | 94  | 36 |
| KYSE110 | exonic   | <i>MYCBP2</i>  | nonsynonymous SNV   | NM_015057:c.G2860C:p.V954L     | chr13 | 77798665  | 77798665  | C | G | 0.385964912 | 0.32 | 57  | 22 |
| KYSE110 | exonic   | <i>TEX2</i>    | nonsynonymous SNV   | NM_018469:c.C614A:p.P205Q      | chr17 | 62290964  | 62290964  | G | T | 0.387096774 | 0.50 | 93  | 36 |
| KYSE110 | exonic   | <i>PHF3</i>    | nonsynonymous SNV   | NM_015153:c.C2776A:p.Q926K     | chr6  | 64408208  | 64408208  | C | A | 0.392156863 | 0.35 | 102 | 40 |
| KYSE110 | exonic   | <i>TTN</i>     | nonsynonymous SNV   | NM_003319:c.G3829T:p.A1277S    | chr2  | 179643842 | 179643842 | C | A | 0.397058824 | 0.52 | 68  | 27 |
| KYSE110 | exonic   | <i>USP31</i>   | nonsynonymous SNV   | NM_020718:c.T2755C:p.S919P     | chr16 | 23080671  | 23080671  | A | G | 0.397435897 | 0.45 | 78  | 31 |
| KYSE110 | exonic   | <i>TBC1D4</i>  | nonsynonymous SNV   | NM_014832:c.T2653C:p.C885R     | chr13 | 75880548  | 75880548  | A | G | 0.397590361 | 0.42 | 83  | 33 |
| KYSE110 | exonic   | <i>MYH6</i>    | nonsynonymous SNV   | NM_002471:c.G2044A:p.A682T     | chr14 | 23866385  | 23866385  | C | T | 0.406779661 | 0.71 | 59  | 24 |
| KYSE110 | exonic   | <i>RP1</i>     | nonsynonymous SNV   | NM_006269:c.C1175T:p.S392L     | chr8  | 55537617  | 55537617  | C | T | 0.40776699  | 0.57 | 103 | 42 |
| KYSE110 | exonic   | <i>MUC4</i>    | nonsynonymous SNV   | NM_018406:c.G1576C:p.A526P     | chr3  | 195516875 | 195516875 | C | G | 0.419354839 | 0.67 | 124 | 52 |
| KYSE110 | exonic   | <i>FAM135B</i> | nonsynonymous SNV   | NM_015912:c.A1684G:p.N562D     | chr8  | 139165034 | 139165034 | T | C | 0.421052632 | 0.38 | 95  | 40 |
| KYSE110 | exonic   | <i>ATRNL1</i>  | nonsynonymous SNV   | NM_207303:c.G2000T:p.C667F     | chr10 | 117027821 | 117027821 | G | T | 0.428571429 | 0.70 | 63  | 27 |

|         |          |                |                   |                                |                |       |           |           |   |   |             |      |     |     |
|---------|----------|----------------|-------------------|--------------------------------|----------------|-------|-----------|-----------|---|---|-------------|------|-----|-----|
| KYSE110 | exonic   | <i>PCDH9</i>   | nonsynonymous SNV | NM_020403:c.G3257A:p.R1086Q    |                | chr13 | 66879142  | 66879142  | C | T | 0.428571429 | 0.33 | 49  | 21  |
| KYSE110 | splicing | <i>NRAP</i>    |                   |                                |                | chr10 | 115413885 | 115413885 | C | T | 0.524752475 | 0.25 | 101 | 53  |
| KYSE110 | exonic   | <i>MUC2</i>    | nonsynonymous SNV | NM_002457:c.G4534A:p.A1512T    |                | chr11 | 1092715   | 1092715   | G | A | 0.578947368 | 0.91 | 19  | 11  |
| KYSE110 | exonic   | <i>FAM46C</i>  | nonsynonymous SNV | NM_017709:c.T355G:p.F119V      |                | chr1  | 118165845 | 118165845 | T | G | 0.583333333 | 0.48 | 72  | 42  |
| KYSE110 | exonic   | <i>IL16</i>    | nonsynonymous SNV | NM_004513:c.C1496T:p.P499L     |                | chr15 | 81598427  | 81598427  | C | T | 0.604651163 | 0.50 | 43  | 26  |
| KYSE110 | exonic   | <i>SALL3</i>   | nonsynonymous SNV | NM_171999:c.C3605T:p.A1202V    |                | chr18 | 76757024  | 76757024  | C | T | 0.625       | 0.67 | 24  | 15  |
| KYSE110 | exonic   | <i>GPRIN3</i>  | nonsynonymous SNV | NM_198281:c.G201T:p.Q67H       |                | chr4  | 90171061  | 90171061  | C | A | 0.62962963  | 0.53 | 27  | 17  |
| KYSE110 | exonic   | <i>TAF1L</i>   | nonsynonymous SNV | NM_153809:c.G4768A:p.D1590N    |                | chr9  | 32630810  | 32630810  | C | T | 0.638095238 | 0.48 | 105 | 67  |
| KYSE110 | exonic   | <i>LCT</i>     | nonsynonymous SNV | NM_002299:c.G97A:p.G33S        |                | chr2  | 136594643 | 136594643 | C | T | 0.648648649 | 0.71 | 37  | 24  |
| KYSE110 | exonic   | <i>NFE2L2</i>  | nonsynonymous SNV | NM_001145412:c.A198T:p.E66D    | 571800:158107  | chr2  | 178098799 | 178098799 | T | A | 0.65060241  | 0.43 | 83  | 54  |
| KYSE110 | exonic   | <i>RGS20</i>   | nonsynonymous SNV | NM_003702:c.G554A:p.R185Q      |                | chr8  | 54870846  | 54870846  | G | A | 0.659574468 | 0.71 | 47  | 31  |
| KYSE110 | exonic   | <i>DMD</i>     | nonsynonymous SNV | NM_004007:c.G3559A:p.E1187K    |                | chrX  | 32456501  | 32456501  | C | T | 0.75        | 0.21 | 44  | 33  |
| KYSE110 | exonic   | <i>TG</i>      | nonsynonymous SNV | NM_003235:c.G4112A:p.R1371Q    |                | chr8  | 133923731 | 133923731 | G | A | 0.777777778 | 0.38 | 72  | 56  |
| KYSE110 | exonic   | <i>NOTCH2</i>  | nonsynonymous SNV | NM_024408:c.C6889T:p.P2297S    |                | chr1  | 120458456 | 120458456 | G | A | 0.8         | 0.58 | 15  | 12  |
| KYSE110 | exonic   | <i>EP300</i>   | nonsynonymous SNV | NM_001429:c.G4199A:p.S1400N    |                | chr22 | 41565533  | 41565533  | G | A | 0.80952381  | 0.76 | 63  | 51  |
| KYSE110 | exonic   | <i>FAM196B</i> | nonsynonymous SNV | NM_001129891:c.A1442T:p.Q481L  |                | chr5  | 169291443 | 169291443 | T | A | 0.896551724 | 0.42 | 29  | 26  |
| KYSE110 | exonic   | <i>CUBN</i>    | nonsynonymous SNV | NM_001081:c.G10576A:p.G3526S   |                | chr10 | 16870992  | 16870992  | C | T | 0.957446809 | 0.44 | 47  | 45  |
| KYSE110 | exonic   | <i>DMD</i>     | nonsynonymous SNV | NM_004014:c.G349A:p.D117N      |                | chrX  | 31514916  | 31514916  | C | T | 1           | 0.76 | 25  | 25  |
| KYSE110 | exonic   | <i>DNAH5</i>   | nonsynonymous SNV | NM_001369:c.A3524G:p.Y1175C    | 1645677        | chr5  | 13871747  | 13871747  | T | C | 1           | 0.39 | 119 | 119 |
| KYSE110 | exonic   | <i>KDM6A</i>   | nonsynonymous SNV | NM_021140:c.C2450T:p.S817F     | 870:749715:94  | chrX  | 44929350  | 44929350  | C | T | 1           | 0.49 | 41  | 41  |
| KYSE110 | exonic   | <i>MUC4</i>    | nonsynonymous SNV | NM_018406:c.C11468T:p.T3823I   |                | chr3  | 195506983 | 195506983 | G | A | 1           | 0.38 | 16  | 16  |
| KYSE110 | exonic   | <i>SHANK2</i>  | unknown           | UNKNOWN                        |                | chr11 | 70858246  | 70858246  | T | A | 1           | 0.50 | 12  | 12  |
| KYSE110 | exonic   | <i>TP53</i>    | stopgain SNV      | NM_001126115:c.C628T:p.R210X   | 907282:908482  | chr17 | 7574003   | 7574003   | G | A | 1           | 0.47 | 57  | 57  |
| KYSE150 | exonic   | <i>MUC2</i>    | nonsynonymous SNV | NM_002457:c.A4678C:p.T1560P    |                | chr11 | 1092859   | 1092859   | A | C | 0.080168776 | 0.89 | 237 | 19  |
| KYSE150 | exonic   | <i>MUC16</i>   | nonsynonymous SNV | NM_024690:c.A40729G:p.S13577G  |                | chr19 | 8999446   | 8999446   | T | C | 0.085714286 | 0.33 | 105 | 9   |
| KYSE150 | exonic   | <i>MUC4</i>    | nonsynonymous SNV | NM_018406:c.C8800T:p.L2934F    |                | chr3  | 195509651 | 195509651 | G | A | 0.086092715 | 0.62 | 151 | 13  |
| KYSE150 | exonic   | <i>MUC4</i>    | nonsynonymous SNV | NM_018406:c.A11128G:p.T3710A   |                | chr3  | 195507323 | 195507323 | T | C | 0.087248322 | 0.54 | 149 | 13  |
| KYSE150 | exonic   | <i>THSD7A</i>  | nonsynonymous SNV | NM_015204:c.A4900G:p.K1634E    |                | chr7  | 11415495  | 11415495  | T | C | 0.089473684 | 0.59 | 190 | 17  |
| KYSE150 | exonic   | <i>MUC4</i>    | nonsynonymous SNV | NM_018406:c.G4936A:p.A1646T    | 1645683        | chr3  | 195513515 | 195513515 | C | T | 0.089820359 | 0.73 | 167 | 15  |
| KYSE150 | exonic   | <i>MUC4</i>    | nonsynonymous SNV | NM_018406:c.C11258T:p.A3753V   |                | chr3  | 195507193 | 195507193 | G | A | 0.09009009  | 0.50 | 111 | 10  |
| KYSE150 | exonic   | <i>MUC4</i>    | nonsynonymous SNV | NM_018406:c.A331C:p.M111L      |                | chr3  | 195518120 | 195518120 | T | G | 0.090225564 | 0.67 | 133 | 12  |
| KYSE150 | exonic   | <i>IKZF1</i>   | nonsynonymous SNV | NM_001220765:c.G132T:p.Q44H    |                | chr7  | 50367325  | 50367325  | G | T | 0.090909091 | 0.33 | 66  | 6   |
| KYSE150 | exonic   | <i>USH2A</i>   | nonsynonymous SNV | NM_206933:c.G14138T:p.W4713L   |                | chr1  | 215824139 | 215824139 | C | A | 0.09375     | 0.33 | 64  | 6   |
| KYSE150 | exonic   | <i>MUC2</i>    | nonsynonymous SNV | NM_002457:c.C4679T:p.T1560M    |                | chr11 | 1092860   | 1092860   | C | T | 0.105882353 | 0.78 | 255 | 27  |
| KYSE150 | exonic   | <i>MUC4</i>    | nonsynonymous SNV | NM_018406:c.C8282T:p.A2761V    |                | chr3  | 195510169 | 195510169 | G | A | 0.107843137 | 0.91 | 102 | 11  |
| KYSE150 | exonic   | <i>ZFH4</i>    | nonsynonymous SNV | NM_024721:c.C9517T:p.P3173S    |                | chr8  | 77775467  | 77775467  | C | T | 0.109375    | 0.86 | 64  | 7   |
| KYSE150 | exonic   | <i>EPHK1</i>   | nonsynonymous SNV | NM_031308:c.G7132C:p.D2378H    |                | chr8  | 144940290 | 144940290 | C | G | 0.111111111 | 0.67 | 108 | 12  |
| KYSE150 | exonic   | <i>PHF3</i>    | nonsynonymous SNV | NM_015153:c.C4163A:p.T1388K    |                | chr6  | 64421647  | 64421647  | C | A | 0.114503817 | 0.47 | 131 | 15  |
| KYSE150 | exonic   | <i>MUC4</i>    | nonsynonymous SNV | NM_018406:c.G8775C:p.Q2925H    | 1645684        | chr3  | 195509676 | 195509676 | C | G | 0.115384615 | 0.60 | 130 | 15  |
| KYSE150 | exonic   | <i>FAT3</i>    | nonsynonymous SNV | NM_001008781:c.G9713A:p.R3238K |                | chr11 | 92565019  | 92565019  | G | A | 0.11627907  | 0.60 | 86  | 10  |
| KYSE150 | exonic   | <i>ZNF717</i>  | nonsynonymous SNV | NM_001128223:c.G392A:p.G131E   |                | chr3  | 75788382  | 75788382  | C | T | 0.118811881 | 0.83 | 303 | 36  |
| KYSE150 | exonic   | <i>MUC4</i>    | nonsynonymous SNV | NM_018406:c.T332A:p.M111K      |                | chr3  | 195518119 | 195518119 | A | T | 0.124087591 | 0.47 | 137 | 17  |
| KYSE150 | exonic   | <i>ABC1</i>    | nonsynonymous SNV | NM_000927:c.G805C:p.G269R      |                | chr7  | 87190601  | 87190601  | C | G | 0.124260355 | 0.67 | 169 | 21  |
| KYSE150 | exonic   | <i>HYDIN</i>   | nonsynonymous SNV | NM_032821:c.T6293A:p.V2098E    |                | chr16 | 70989298  | 70989298  | A | T | 0.125984252 | 0.69 | 127 | 16  |
| KYSE150 | exonic   | <i>RP1L1</i>   | nonsynonymous SNV | NM_178857:c.G3935A:p.G1312E    |                | chr8  | 10467673  | 10467673  | C | T | 0.12962963  | 0.21 | 108 | 14  |
| KYSE150 | exonic   | <i>MLL3</i>    | nonsynonymous SNV | NM_170606:c.C2656T:p.R886C     |                | chr7  | 151933015 | 151933015 | G | A | 0.131313131 | 0.08 | 99  | 13  |
| KYSE150 | exonic   | <i>MUC2</i>    | nonsynonymous SNV | NM_002457:c.C4709T:p.T1570I    |                | chr11 | 1092890   | 1092890   | C | T | 0.132867133 | 0.63 | 286 | 38  |
| KYSE150 | exonic   | <i>MUC6</i>    | nonsynonymous SNV | NM_005961:c.C4889T:p.T1630I    |                | chr11 | 1017912   | 1017912   | G | A | 0.133858268 | 0.35 | 127 | 17  |
| KYSE150 | exonic   | <i>ZNF717</i>  | nonsynonymous SNV | NM_001128223:c.T2530A:p.C844S  |                | chr3  | 75786244  | 75786244  | A | T | 0.139917695 | 0.44 | 243 | 34  |
| KYSE150 | exonic   | <i>SLC9A4</i>  | stopgain SNV      | NM_001011552:c.G1021T:p.E341X  |                | chr2  | 103121753 | 103121753 | G | T | 0.141176471 | 0.67 | 85  | 12  |
| KYSE150 | exonic   | <i>MUC4</i>    | nonsynonymous SNV | NM_018406:c.A3037G:p.S1013G    | 881:1645683:16 | chr3  | 195515414 | 195515414 | T | C | 0.141509434 | 0.27 | 106 | 15  |
| KYSE150 | exonic   | <i>NDOR1</i>   | nonsynonymous SNV | NM_001144026:c.T166C:p.F56L    |                | chr9  | 140100714 | 140100714 | T | C | 0.142857143 | 0.44 | 112 | 16  |
| KYSE150 | exonic   | <i>USH2A</i>   | nonsynonymous SNV | NM_206933:c.C5222T:p.S1741F    |                | chr1  | 216256874 | 216256874 | G | A | 0.169082126 | 0.47 | 414 | 70  |
| KYSE150 | exonic   | <i>KCNG1</i>   | nonsynonymous SNV | NM_002237:c.G405T:p.K135N      |                | chr20 | 49626471  | 49626471  | C | A | 0.173913043 | 0.25 | 46  | 8   |
| KYSE150 | exonic   | <i>MUC2</i>    | nonsynonymous SNV | NM_002457:c.C5114T:p.T1705I    |                | chr11 | 1093295   | 1093295   | C | T | 0.179104478 | 0.83 | 134 | 24  |
| KYSE150 | exonic   | <i>THSD7A</i>  | nonsynonymous SNV | NM_015204:c.C954A:p.D318E      |                | chr7  | 11675825  | 11675825  | G | T | 0.194594595 | 0.31 | 185 | 36  |
| KYSE150 | exonic   | <i>USH2A</i>   | nonsynonymous SNV | NM_206933:c.T5626A:p.L1876M    |                | chr1  | 216246589 | 216246589 | A | T | 0.196774194 | 0.51 | 310 | 61  |
| KYSE150 | exonic   | <i>FBN2</i>    | nonsynonymous SNV | NM_001999:c.C3704A:p.P1235Q    |                | chr5  | 127671700 | 127671700 | G | T | 0.196969697 | 0.62 | 132 | 26  |

|         |                 |                 |                   |                                |               |  |       |           |           |   |   |             |      |     |    |
|---------|-----------------|-----------------|-------------------|--------------------------------|---------------|--|-------|-----------|-----------|---|---|-------------|------|-----|----|
| KYSE150 | exonic          | <i>MKRN3</i>    | nonsynonymous SNV | NM_005664:c.C428T;p.P143L      |               |  | chr15 | 23811357  | 23811357  | C | T | 0.2         | 0.44 | 80  | 16 |
| KYSE150 | exonic          | <i>COBL</i>     | stopgain SNV      | NM_015198:c.C2938T;p.Q980X     |               |  | chr7  | 51095855  | 51095855  | G | A | 0.21212121  | 0.57 | 66  | 14 |
| KYSE150 | exonic          | <i>OR6Q1</i>    | nonsynonymous SNV | NM_001005186:c.G946A;p.G316R   |               |  | chr11 | 57799370  | 57799370  | G | A | 0.22222222  | 0.20 | 90  | 20 |
| KYSE150 | exonic          | <i>MERTK</i>    | nonsynonymous SNV | NM_006343:c.A1282G;p.S428G     | 1482079       |  | chr2  | 112740556 | 112740556 | A | G | 0.223684211 | 0.35 | 76  | 17 |
| KYSE150 | exonic          | <i>GPR98</i>    | stopgain SNV      | NM_032119:c.C8356T;p.Q2786X    |               |  | chr5  | 90000275  | 90000275  | C | T | 0.224489796 | 0.21 | 147 | 33 |
| KYSE150 | exonic          | <i>NF1</i>      | nonsynonymous SNV | NM_000267:c.G4346A;p.S1449N    | 8450:949171:1 |  | chr17 | 29586126  | 29586126  | G | A | 0.224489796 | 0.18 | 49  | 11 |
| KYSE150 | exonic          | <i>SMARCA4</i>  | nonsynonymous SNV | NM_001128845:c.C2832G;p.N944K  | 722045        |  | chr19 | 11132616  | 11132616  | C | G | 0.230769231 | 0.33 | 26  | 6  |
| KYSE150 | exonic          | <i>INTS9</i>    | nonsynonymous SNV | NM_001145159:c.A632C;p.E211A   |               |  | chr8  | 28669893  | 28669893  | T | G | 0.231707317 | 0.47 | 82  | 19 |
| KYSE150 | exonic          | <i>PCLO</i>     | nonsynonymous SNV | NM_014510:c.A8770T;p.I2924L    |               |  | chr7  | 82581499  | 82581499  | T | A | 0.234285714 | 0.78 | 175 | 41 |
| KYSE150 | exonic          | <i>TMEM2</i>    | nonsynonymous SNV | NM_001135820:c.G259C;p.A87P    |               |  | chr9  | 74365031  | 74365031  | C | G | 0.238636364 | 0.52 | 88  | 21 |
| KYSE150 | exonic          | <i>TG</i>       | nonsynonymous SNV | NM_003235:c.C7724T;p.S2575F    |               |  | chr8  | 134125817 | 134125817 | C | T | 0.243243243 | 0.33 | 37  | 9  |
| KYSE150 | exonic          | <i>CSMD3</i>    | nonsynonymous SNV | NM_052900:c.C7591T;p.P2531S    |               |  | chr8  | 113318404 | 113318404 | G | A | 0.245901639 | 0.43 | 122 | 30 |
| KYSE150 | exonic:splicing | <i>ARHGAP31</i> | nonsynonymous SNV | NM_020754:c.A538T;p.R180W      |               |  | chr3  | 119101245 | 119101245 | A | T | 0.256097561 | 0.24 | 82  | 21 |
| KYSE150 | exonic          | <i>ARPP21</i>   | nonsynonymous SNV | NM_016300:c.G1997A;p.R666K     |               |  | chr3  | 35785422  | 35785422  | G | A | 0.257425743 | 0.42 | 101 | 26 |
| KYSE150 | exonic          | <i>OR8B8</i>    | nonsynonymous SNV | NM_012378:c.C410A;p.S137Y      |               |  | chr11 | 124310572 | 124310572 | G | T | 0.263157895 | 0.50 | 76  | 20 |
| KYSE150 | exonic          | <i>TTN</i>      | nonsynonymous SNV | NM_133378:c.C13699G;p.Q4567E   |               |  | chr2  | 179596062 | 179596062 | G | C | 0.267175573 | 0.60 | 131 | 35 |
| KYSE150 | exonic          | <i>MYH4</i>     | nonsynonymous SNV | NM_017533:c.C4156T;p.R1386C    |               |  | chr17 | 10353795  | 10353795  | G | A | 0.268817204 | 0.60 | 93  | 25 |
| KYSE150 | exonic          | <i>CNTN5</i>    | stopgain SNV      | NM_175566:c.G15A;p.W5X         |               |  | chr11 | 99426960  | 99426960  | G | A | 0.272727273 | 0.50 | 66  | 18 |
| KYSE150 | exonic          | <i>XIRP2</i>    | nonsynonymous SNV | NM_001199144:c.G7354A;p.E2452K |               |  | chr2  | 168105922 | 168105922 | G | A | 0.276595745 | 0.62 | 94  | 26 |
| KYSE150 | exonic          | <i>MCOLN1</i>   | nonsynonymous SNV | NM_020533:c.C935A;p.S312Y      |               |  | chr19 | 7593540   | 7593540   | C | A | 0.282051282 | 0.73 | 39  | 11 |
| KYSE150 | exonic          | <i>TTN</i>      | nonsynonymous SNV | NM_003319:c.G29253T;p.K9751N   |               |  | chr2  | 179464072 | 179464072 | C | A | 0.283333333 | 0.50 | 120 | 34 |
| KYSE150 | exonic          | <i>NBEA</i>     | nonsynonymous SNV | NM_015678:c.G2211T;p.M7371     |               |  | chr13 | 35692579  | 35692579  | G | T | 0.283464567 | 0.36 | 127 | 36 |
| KYSE150 | exonic          | <i>LRP1B</i>    | nonsynonymous SNV | NM_018557:c.C2412T;p.A3141S    |               |  | chr2  | 141242916 | 141242916 | C | A | 0.287878788 | 0.79 | 66  | 19 |
| KYSE150 | exonic          | <i>RIMS2</i>    | stopgain SNV      | NM_001100117:c.C578G;p.S193X   |               |  | chr8  | 104778645 | 104778645 | C | G | 0.292035398 | 0.67 | 113 | 33 |
| KYSE150 | exonic          | <i>CLCN4</i>    | nonsynonymous SNV | NM_001830:c.T494A;p.F165Y      |               |  | chrX  | 10166040  | 10166040  | T | A | 0.3         | 0.50 | 20  | 6  |
| KYSE150 | exonic          | <i>NEK10</i>    | nonsynonymous SNV | NM_199347:c.C836A;p.A279E      |               |  | chr3  | 27346430  | 27346430  | G | T | 0.302325581 | 0.46 | 43  | 13 |
| KYSE150 | exonic          | <i>MYBPC1</i>   | nonsynonymous SNV | NM_001254722:c.C2662G;p.P888A  |               |  | chr12 | 102069075 | 102069075 | C | G | 0.307692308 | 0.75 | 91  | 28 |
| KYSE150 | exonic          | <i>TPR</i>      | nonsynonymous SNV | NM_003292:c.G7079T;p.G2360V    |               |  | chr1  | 186283116 | 186283116 | C | A | 0.315315315 | 0.63 | 111 | 35 |
| KYSE150 | exonic          | <i>COL24A1</i>  | nonsynonymous SNV | NM_152890:c.C635A;p.S212Y      |               |  | chr1  | 86591384  | 86591384  | G | T | 0.321428571 | 0.56 | 112 | 36 |
| KYSE150 | exonic          | <i>TIPARP</i>   | nonsynonymous SNV | NM_001184717:c.G19A;p.E7K      |               |  | chr3  | 156395505 | 156395505 | G | A | 0.32173913  | 0.65 | 115 | 37 |
| KYSE150 | exonic          | <i>FUBP1</i>    | nonsynonymous SNV | NM_003902:c.A1579G;p.K527E     |               |  | chr1  | 78422383  | 78422383  | T | C | 0.333333333 | 0.42 | 93  | 31 |
| KYSE150 | exonic          | <i>SYNE1</i>    | nonsynonymous SNV | NM_033071:c.A1868T;p.D623V     |               |  | chr6  | 152786478 | 152786478 | T | A | 0.337662338 | 0.69 | 77  | 26 |
| KYSE150 | exonic          | <i>PLAG1</i>    | nonsynonymous SNV | NM_001114635:c.G1096A;p.E366K  |               |  | chr8  | 57078963  | 57078963  | C | T | 0.338983051 | 0.55 | 59  | 20 |
| KYSE150 | exonic          | <i>OTOA</i>     | nonsynonymous SNV | NM_001161683:c.T686A;p.F229Y   |               |  | chr16 | 21712291  | 21712291  | T | A | 0.340206186 | 0.48 | 97  | 33 |
| KYSE150 | exonic          | <i>ZNF365</i>   | nonsynonymous SNV | NM_014951:c.G712A;p.E238K      |               |  | chr10 | 64136664  | 64136664  | G | A | 0.340909091 | 0.27 | 44  | 15 |
| KYSE150 | exonic          | <i>DQX1</i>     | nonsynonymous SNV | NM_133637:c.G1571A;p.G524D     |               |  | chr2  | 74747086  | 74747086  | C | T | 0.347826087 | 0.53 | 92  | 32 |
| KYSE150 | exonic          | <i>SIPAL2</i>   | nonsynonymous SNV | NM_020808:c.C4907A;p.P1636Q    |               |  | chr1  | 232539227 | 232539227 | G | T | 0.347826087 | 0.75 | 23  | 8  |
| KYSE150 | exonic          | <i>PTPRK</i>    | nonsynonymous SNV | NM_002844:c.G4141A;p.G1381S    |               |  | chr6  | 128294295 | 128294295 | C | T | 0.349056604 | 0.43 | 106 | 37 |
| KYSE150 | exonic          | <i>GPR37</i>    | stopgain SNV      | NM_005302:c.G630A;p.W210X      |               |  | chr7  | 124404401 | 124404401 | C | T | 0.35        | 0.57 | 20  | 7  |
| KYSE150 | exonic          | <i>FBXO11</i>   | nonsynonymous SNV | NM_001190274:c.G548A;p.C183Y   | 753548        |  | chr2  | 48066037  | 48066037  | C | T | 0.350574713 | 0.59 | 174 | 61 |
| KYSE150 | exonic          | <i>ZFP82</i>    | nonsynonymous SNV | NM_133466:c.G725C;p.R242T      |               |  | chr19 | 36884517  | 36884517  | C | G | 0.350649351 | 0.48 | 154 | 54 |
| KYSE150 | exonic          | <i>EMILIN2</i>  | nonsynonymous SNV | NM_032048:c.G1381A;p.E461K     |               |  | chr18 | 2891506   | 2891506   | G | A | 0.351351351 | 0.48 | 148 | 52 |
| KYSE150 | exonic          | <i>HELZ</i>     | nonsynonymous SNV | NM_014877:c.G3288C;p.K1096N    |               |  | chr17 | 65124866  | 65124866  | C | G | 0.351351351 | 0.50 | 74  | 26 |
| KYSE150 | exonic          | <i>DNAH10</i>   | nonsynonymous SNV | NM_207437:c.G2170A;p.D724N     |               |  | chr12 | 124285889 | 124285889 | G | A | 0.352112676 | 0.48 | 142 | 50 |
| KYSE150 | exonic          | <i>FSIP2</i>    | nonsynonymous SNV | NM_173651:c.C15163A;p.H5055N   |               |  | chr2  | 186668929 | 186668929 | C | A | 0.353383459 | 0.49 | 133 | 47 |
| KYSE150 | exonic          | <i>DDX42</i>    | nonsynonymous SNV | NM_203499:c.A428T;p.N143I      |               |  | chr17 | 61875453  | 61875453  | A | T | 0.35483871  | 0.27 | 124 | 44 |
| KYSE150 | exonic          | <i>DNAH10</i>   | nonsynonymous SNV | NM_207437:c.C518T;p.S173F      |               |  | chr12 | 124265706 | 124265706 | C | T | 0.35483871  | 0.47 | 155 | 55 |
| KYSE150 | exonic          | <i>ATM</i>      | nonsynonymous SNV | NM_000051:c.C7904G;p.A2635G    |               |  | chr11 | 108203604 | 108203604 | C | G | 0.36        | 0.33 | 125 | 45 |
| KYSE150 | exonic:splicing | <i>IGSF10</i>   | stopgain SNV      | NM_178822:c.G5062T;p.G1688X    |               |  | chr3  | 151162707 | 151162707 | C | A | 0.361111111 | 0.62 | 108 | 39 |
| KYSE150 | exonic          | <i>MUC16</i>    | nonsynonymous SNV | NM_024690:c.C21167A;p.A7056E   |               |  | chr19 | 9066279   | 9066279   | G | T | 0.364485981 | 0.56 | 107 | 39 |
| KYSE150 | exonic          | <i>TTN</i>      | nonsynonymous SNV | NM_133378:c.A19822C;p.T6608P   |               |  | chr2  | 179584815 | 179584815 | T | G | 0.365591398 | 0.56 | 93  | 34 |
| KYSE150 | exonic          | <i>ZNF540</i>   | nonsynonymous SNV | NM_001172226:c.G606T;p.Q202H   |               |  | chr19 | 38102883  | 38102883  | G | T | 0.366666667 | 0.52 | 90  | 33 |
| KYSE150 | exonic          | <i>PMS1</i>     | stopgain SNV      | NM_001128143:c.T1572G;p.Y524X  |               |  | chr2  | 190719687 | 190719687 | T | G | 0.379310345 | 0.62 | 174 | 66 |
| KYSE150 | exonic          | <i>ADH4</i>     | stopgain SNV      | NM_000670:c.G875A;p.W292X      |               |  | chr4  | 100048464 | 100048464 | C | T | 0.391304348 | 0.44 | 46  | 18 |
| KYSE150 | exonic          | <i>SIPAL2</i>   | nonsynonymous SNV | NM_020808:c.G2359T;p.A787S     |               |  | chr1  | 232601047 | 232601047 | C | A | 0.40625     | 0.50 | 64  | 26 |
| KYSE150 | exonic          | <i>AHNAK2</i>   | nonsynonymous SNV | NM_138420:c.G9097T;p.A3033S    |               |  | chr14 | 105412691 | 105412691 | C | A | 0.421052632 | 0.63 | 38  | 16 |
| KYSE150 | exonic          | <i>ZNF189</i>   | nonsynonymous SNV | NM_003452:c.G1544C;p.R515T     |               |  | chr9  | 104171594 | 104171594 | G | C | 0.430107527 | 0.50 | 93  | 40 |
| KYSE150 | exonic          | <i>MCM3AP</i>   | nonsynonymous SNV | NM_003906:c.C4691T;p.S1564F    |               |  | chr21 | 47665068  | 47665068  | G | A | 0.430379747 | 0.44 | 79  | 34 |

|         |                 |                 |                         |                                                   |                |       |           |           |   |         |             |      |     |     |
|---------|-----------------|-----------------|-------------------------|---------------------------------------------------|----------------|-------|-----------|-----------|---|---------|-------------|------|-----|-----|
| KYSE150 | exonic          | <i>AHNAK2</i>   | nonsynonymous SNV       | NM_138420:c.G7725T;p.K2575N                       |                | chr14 | 105414063 | 105414063 | C | A       | 0.55555556  | 0.40 | 63  | 35  |
| KYSE150 | exonic          | <i>DNAH5</i>    | nonsynonymous SNV       | NM_001369:c.C8423T;p.T2808I                       |                | chr5  | 13792128  | 13792128  | G | A       | 0.649350649 | 0.70 | 77  | 50  |
| KYSE150 | exonic          | <i>ARID2</i>    | stopgain SNV            | NM_152641:c.C3817T;p.R1273X                       |                | chr12 | 46245723  | 46245723  | C | T       | 0.661016949 | 0.51 | 118 | 78  |
| KYSE150 | exonic          | <i>FLT1</i>     | nonsynonymous SNV       | NM_002019:c.C2306T;p.A769V                        |                | chr13 | 28919631  | 28919631  | G | A       | 0.666666667 | 0.57 | 81  | 54  |
| KYSE150 | exonic          | <i>ZFXH4</i>    | nonsynonymous SNV       | NM_024721:c.C8374A;p.G2792R                       |                | chr8  | 77767531  | 77767531  | G | A       | 0.666666667 | 0.53 | 96  | 64  |
| KYSE150 | exonic          | <i>PRF1</i>     | nonsynonymous SNV       | NM_001083116:c.G530A;p.R177H                      |                | chr10 | 72360129  | 72360129  | C | T       | 0.727272727 | 0.50 | 11  | 8   |
| KYSE150 | exonic          | <i>TTN</i>      | nonsynonymous SNV       | NM_003319:c.C54830T;p.T18277I                     |                | chr2  | 179428834 | 179428834 | G | A       | 0.728813559 | 0.58 | 118 | 86  |
| KYSE150 | exonic          | <i>MUC5B</i>    | nonsynonymous SNV       | NM_002458:c.C4889T;p.T1630M                       |                | chr11 | 1262999   | 1262999   | C | T       | 0.791666667 | 0.68 | 24  | 19  |
| KYSE150 | exonic          | <i>MUC4</i>     | nonsynonymous SNV       | NM_018406:c.C11468T;p.T3823I                      |                | chr3  | 195506983 | 195506983 | G | A       | 0.823529412 | 0.50 | 17  | 14  |
| KYSE150 | exonic          | <i>C18orf34</i> | nonsynonymous SNV       | NM_001105528:c.C125A;p.A42D                       |                | chr18 | 30969587  | 30969587  | G | T       | 1           | 0.20 | 50  | 50  |
| KYSE150 | exonic          | <i>GPR112</i>   | nonsynonymous SNV       | NM_153834:c.T4507G;p.S1503A                       |                | chrX  | 135430372 | 135430372 | T | G       | 1           | 0.53 | 104 | 104 |
| KYSE150 | exonic          | <i>PIWIL3</i>   | nonsynonymous SNV       | NM_001008496:c.C2203T;p.L735F                     |                | chr22 | 25120909  | 25120909  | G | A       | 1           | 0.55 | 86  | 86  |
| KYSE180 | exonic          | <i>MUC4</i>     | nonsynonymous SNV       | NM_018406:c.A11128G;p.T3710A                      |                | chr3  | 195507323 | 195507323 | T | C       | 0.083333333 | 0.50 | 192 | 16  |
| KYSE180 | exonic          | <i>MUC2</i>     | nonsynonymous SNV       | NM_002457:c.T4747A;p.S1583T                       |                | chr11 | 1092928   | 1092928   | T | A       | 0.083798883 | 0.67 | 179 | 15  |
| KYSE180 | exonic          | <i>MUC2</i>     | nonsynonymous SNV       | NM_002457:c.C4679T;p.T1560M                       |                | chr11 | 1092860   | 1092860   | C | T       | 0.086294416 | 0.76 | 197 | 17  |
| KYSE180 | exonic          | <i>RP1L1</i>    | nonsynonymous SNV       | NM_178857:c.G3935A;p.G1312E                       |                | chr8  | 10467673  | 10467673  | C | T       | 0.087179487 | 0.29 | 195 | 17  |
| KYSE180 | exonic          | <i>PCLO</i>     | nonsynonymous SNV       | NM_014510:c.A8781T;p.E2927D                       |                | chr7  | 82581488  | 82581488  | T | A       | 0.088495575 | 0.50 | 113 | 10  |
| KYSE180 | exonic          | <i>MUC6</i>     | nonsynonymous SNV       | NM_005961:c.C5912T;p.P1971L                       |                | chr11 | 1016889   | 1016889   | G | A       | 0.089108911 | 0.39 | 202 | 18  |
| KYSE180 | exonic          | <i>MUC16</i>    | nonsynonymous SNV       | NM_024690:c.A40729G;p.S1357G                      |                | chr19 | 8999446   | 8999446   | T | C       | 0.08952239  | 0.50 | 67  | 6   |
| KYSE180 | exonic          | <i>MUC6</i>     | nonsynonymous SNV       | NM_005961:c.C5857T;p.H1953Y                       |                | chr11 | 1016944   | 1016944   | G | A       | 0.095238095 | 0.90 | 105 | 10  |
| KYSE180 | exonic          | <i>MUC4</i>     | nonsynonymous SNV       | NM_018406:c.C8981T;p.T2994L                       |                | chr3  | 195509470 | 195509470 | G | A       | 0.095541401 | 0.87 | 157 | 15  |
| KYSE180 | exonic          | <i>MUC6</i>     | nonsynonymous SNV       | NM_005961:c.C4889T;p.T1630I                       |                | chr11 | 1017912   | 1017912   | G | A       | 0.100591716 | 0.47 | 169 | 17  |
| KYSE180 | exonic          | <i>MUC4</i>     | nonsynonymous SNV       | NM_018406:c.C8972T;p.T2991I                       |                | chr3  | 195509479 | 195509479 | G | A       | 0.102040816 | 0.87 | 147 | 15  |
| KYSE180 | exonic          | <i>MUC2</i>     | nonsynonymous SNV       | NM_002457:c.C4709T;p.T1570I                       |                | chr11 | 1092890   | 1092890   | C | T       | 0.109756098 | 0.59 | 246 | 27  |
| KYSE180 | exonic          | <i>MUC4</i>     | nonsynonymous SNV       | NM_018406:c.G4936A;p.A1646T                       | 1645683        | chr3  | 195513515 | 195513515 | C | T       | 0.11682243  | 0.88 | 214 | 25  |
| KYSE180 | exonic          | <i>MUC4</i>     | nonsynonymous SNV       | NM_138297:c.G358T;p.G120C                         |                | chr3  | 195498546 | 195498546 | C | A       | 0.119402985 | 0.75 | 67  | 8   |
| KYSE180 | exonic          | <i>MUC4</i>     | nonsynonymous SNV       | NM_018406:c.C8282T;p.A2761V                       |                | chr3  | 195510169 | 195510169 | G | A       | 0.121019108 | 0.89 | 157 | 19  |
| KYSE180 | exonic          | <i>NLGN1</i>    | nonsynonymous SNV       | NM_014932:c.G1174A;p.G392R                        |                | chr3  | 173996965 | 173996965 | G | A       | 0.121052632 | 0.35 | 380 | 46  |
| KYSE180 | exonic          | <i>MUC2</i>     | nonsynonymous SNV       | NM_002457:c.C5114T;p.T1705I                       |                | chr11 | 1093295   | 1093295   | C | T       | 0.124031008 | 0.81 | 129 | 16  |
| KYSE180 | exonic          | <i>RP1L1</i>    | nonsynonymous SNV       | NM_178857:c.G4027A;p.E1343K                       |                | chr8  | 10467581  | 10467581  | C | T       | 0.125       | 0.43 | 184 | 23  |
| KYSE180 | exonic          | <i>MUC17</i>    | nonsynonymous SNV       | NM_001040105:c.C7964A;p.T2655K                    |                | chr7  | 100682661 | 100682661 | C | A       | 0.128378378 | 0.47 | 296 | 38  |
| KYSE180 | exonic          | <i>ZNF717</i>   | nonsynonymous SNV       | NM_001128223:c.T2530A;p.C844S                     |                | chr3  | 75786244  | 75786244  | A | T       | 0.12987013  | 0.40 | 231 | 30  |
| KYSE180 | exonic          | <i>GOT1L1</i>   | nonsynonymous SNV       | NM_152413:c.A1088T;p.Y363F                        |                | chr8  | 37791989  | 37791989  | T | A       | 0.136363636 | 0.50 | 44  | 6   |
| KYSE180 | exonic          | <i>MUC4</i>     | nonsynonymous SNV       | NM_018406:c.C8800T;p.L2934F                       |                | chr3  | 195509651 | 195509651 | G | A       | 0.136585366 | 0.79 | 205 | 28  |
| KYSE180 | exonic          | <i>MUC4</i>     | nonsynonymous SNV       | NM_018406:c.C10175T;p.P3392L                      |                | chr3  | 195508276 | 195508276 | G | A       | 0.138888889 | 0.49 | 324 | 45  |
| KYSE180 | exonic          | <i>MUC4</i>     | nonsynonymous SNV       | NM_018406:c.C10174T;p.P3392S                      |                | chr3  | 195508277 | 195508277 | G | A       | 0.141955836 | 0.51 | 317 | 45  |
| KYSE180 | exonic          | <i>EPPK1</i>    | nonsynonymous SNV       | NM_031308:c.G7132C;p.D2378H                       |                | chr8  | 144940290 | 144940290 | C | G       | 0.144       | 0.67 | 125 | 18  |
| KYSE180 | exonic          | <i>MUC4</i>     | nonsynonymous SNV       | NM_018406:c.C8734A;p.P2912T                       |                | chr3  | 195509717 | 195509717 | G | T       | 0.144628099 | 0.34 | 242 | 35  |
| KYSE180 | exonic          | <i>ZNF717</i>   | nonsynonymous SNV       | NM_001128223:c.C746T;p.S249L                      |                | chr3  | 75788028  | 75788028  | G | A       | 0.147727273 | 0.73 | 176 | 26  |
| KYSE180 | exonic          | <i>PHF3</i>     | nonsynonymous SNV       | NM_015153:c.G4043A;p.R1348H                       |                | chr6  | 64421527  | 64421527  | G | A       | 0.149484536 | 0.62 | 194 | 29  |
| KYSE180 | exonic          | <i>SI</i>       | nonsynonymous SNV       | NM_001041:c.T526C;p.Y176H                         |                | chr3  | 164785237 | 164785237 | A | G       | 0.156       | 0.54 | 250 | 39  |
| KYSE180 | exonic          | <i>MUC2</i>     | nonsynonymous SNV       | NM_002457:c.A4678C;p.T1560P                       |                | chr11 | 1092859   | 1092859   | A | C       | 0.164893617 | 0.81 | 188 | 31  |
| KYSE180 | exonic          | <i>EDARADD</i>  | nonsynonymous SNV       | NM_080738:c.G142C;p.D48H                          |                | chr1  | 236590703 | 236590703 | G | C       | 0.174311927 | 0.53 | 109 | 19  |
| KYSE180 | exonic          | <i>ADAMTS12</i> | stopgain SNV            | NM_030955:c.C1429T;p.Q477X                        |                | chr5  | 33648977  | 33648977  | G | A       | 0.185714286 | 0.54 | 70  | 13  |
| KYSE180 | exonic          | <i>ABCA13</i>   | nonsynonymous SNV       | NM_152701:c.G13420T;p.G4474C                      |                | chr7  | 48547541  | 48547541  | G | T       | 0.194444444 | 0.64 | 72  | 14  |
| KYSE180 | exonic          | <i>MUC4</i>     | nonsynonymous SNV       | NM_018406:c.A3037G;p.S1013G                       | 581;1645683;16 | chr3  | 195515414 | 195515414 | T | C       | 0.2         | 0.33 | 75  | 15  |
| KYSE180 | splicing        | <i>NALCN</i>    |                         |                                                   |                | chr13 | 101828650 | 101828650 | C | T       | 0.208092486 | 0.64 | 173 | 36  |
| KYSE180 | exonic          | <i>CBL</i>      | nonsynonymous SNV       | NM_005188:c.C641T;p.P214L                         |                | chr11 | 119144628 | 119144628 | C | T       | 0.214876033 | 0.62 | 121 | 26  |
| KYSE180 | exonic          | <i>C5orf42</i>  | nonsynonymous SNV       | NM_023073:c.C3494T;p.A1165V                       |                | chr5  | 37201706  | 37201706  | G | A       | 0.219047619 | 0.87 | 105 | 23  |
| KYSE180 | exonic          | <i>MUC4</i>     | nonsynonymous SNV       | NM_018406:c.G8775C;p.Q2925H                       | 1645684        | chr3  | 195509676 | 195509676 | C | G       | 0.223958333 | 0.63 | 192 | 43  |
| KYSE180 | exonic          | <i>C7</i>       | nonsynonymous SNV       | NM_000587:c.C1414T;p.H472Y                        |                | chr5  | 40958288  | 40958288  | C | T       | 0.228346457 | 0.21 | 127 | 29  |
| KYSE180 | exonic;splicing | <i>C6</i>       | nonsynonymous SNV       | NM_000065:c.C2101T;p.R701W                        |                | chr5  | 41155074  | 41155074  | G | A       | 0.254901961 | 0.71 | 204 | 52  |
| KYSE180 | exonic          | <i>SLC8A1</i>   | nonsynonymous SNV       | NM_001112801:c.G1893T;p.W631C                     |                | chr2  | 40404911  | 40404911  | C | A       | 0.262032086 | 0.65 | 187 | 49  |
| KYSE180 | exonic          | <i>NRG3</i>     | nonsynonymous SNV       | NM_001010848:c.C827A;p.T276K                      | 1520616        | chr10 | 84118498  | 84118498  | C | A       | 0.263157895 | 0.60 | 76  | 20  |
| KYSE180 | exonic          | <i>PPP2R1A</i>  | nonsynonymous SNV       | NM_014225:c.C560T;p.S187F                         |                | chr19 | 52715995  | 52715995  | C | T       | 0.268292683 | 0.36 | 41  | 11  |
| KYSE180 | exonic          | <i>DSPP</i>     | nonframeshift insertion | NM_014208:c.2643_2644insAGTAGTGAC;p.D881delinsDSS | 1474924        | chr4  | 88536457  | 88536457  | - | GTAGTGA | 0.26984127  | 0.41 | 63  | 17  |
| KYSE180 | exonic          | <i>OR7A10</i>   | nonsynonymous SNV       | NM_001005190:c.C98G;p.S33C                        |                | chr19 | 14952592  | 14952592  | G | C       | 0.270588235 | 0.52 | 85  | 23  |
| KYSE180 | exonic          | <i>RASL10B</i>  | nonsynonymous SNV       | NM_033315:c.C64T;p.R22C                           |                | chr17 | 34062267  | 34062267  | C | T       | 0.272727273 | 0.67 | 22  | 6   |

|         |                 |                |                     |                                |                |       |           |           |   |   |             |      |     |    |
|---------|-----------------|----------------|---------------------|--------------------------------|----------------|-------|-----------|-----------|---|---|-------------|------|-----|----|
| KYSE180 | exonic          | <i>OR2W5</i>   | nonsynonymous SNV   | NM_001004698:c.G919A;p.V307M   |                | chr1  | 247655348 | 247655348 | G | A | 0.277777778 | 0.67 | 54  | 15 |
| KYSE180 | exonic          | <i>ZNF799</i>  | nonsynonymous SNV   | NM_001080821:c.C1475G;p.S492C  |                | chr19 | 12501737  | 12501737  | G | C | 0.292207792 | 0.47 | 154 | 45 |
| KYSE180 | exonic          | <i>ERCC4</i>   | nonsynonymous SNV   | NM_005236:c.G239A;p.G80E       |                | chr16 | 14015919  | 14015919  | G | A | 0.300613497 | 0.57 | 163 | 49 |
| KYSE180 | exonic          | <i>LPPR4</i>   | nonsynonymous SNV   | NM_001166252:c.G1161T;p.K387N  |                | chr1  | 99771609  | 99771609  | G | T | 0.301369863 | 0.36 | 73  | 22 |
| KYSE180 | exonic          | <i>FAM196B</i> | nonsynonymous SNV   | NM_001129891:c.C1541T;p.A514V  |                | chr5  | 169291344 | 169291344 | G | A | 0.310344828 | 0.50 | 58  | 18 |
| KYSE180 | exonic          | <i>ABCB5</i>   | nonsynonymous SNV   | NM_178559:c.G1990C;p.E664Q     |                | chr7  | 20784957  | 20784957  | G | C | 0.311320755 | 0.39 | 106 | 33 |
| KYSE180 | exonic          | <i>RANBP17</i> | nonsynonymous SNV   | NM_022897:c.G769A;p.E257K      |                | chr5  | 170341179 | 170341179 | G | A | 0.317647059 | 0.61 | 170 | 54 |
| KYSE180 | exonic          | <i>RUNDC3B</i> | nonsynonymous SNV   | NM_001134405:c.A857G;p.Q286R   |                | chr7  | 87407172  | 87407172  | A | G | 0.322580645 | 0.45 | 124 | 40 |
| KYSE180 | exonic          | <i>GARNL3</i>  | nonsynonymous SNV   | NM_032293:c.C1168T;p.P390S     |                | chr9  | 130104530 | 130104530 | C | T | 0.323529412 | 0.71 | 170 | 55 |
| KYSE180 | exonic          | <i>HMCN1</i>   | nonsynonymous SNV   | NM_031935:c.C1061T;p.S354F     |                | chr1  | 185892561 | 185892561 | C | T | 0.333333333 | 0.52 | 174 | 58 |
| KYSE180 | exonic          | <i>GATAD2B</i> | nonsynonymous SNV   | NM_020699:c.G992A;p.R331K      |                | chr1  | 153788973 | 153788973 | C | T | 0.344827586 | 0.65 | 58  | 20 |
| KYSE180 | exonic          | <i>ARID2</i>   | nonsynonymous SNV   | NM_152641:c.C994T;p.L332F      |                | chr12 | 46230745  | 46230745  | C | T | 0.353535354 | 0.69 | 99  | 35 |
| KYSE180 | splicing        | <i>TBC1D4</i>  |                     |                                |                | chr13 | 75884077  | 75884077  | C | G | 0.35483871  | 0.55 | 93  | 33 |
| KYSE180 | exonic          | <i>ANKIB1</i>  | stopgain SNV        | NM_019004:c.3109delA;p.I1037X  |                | chr7  | 92028102  | 92028102  | A | - | 0.361111111 | 0.38 | 72  | 26 |
| KYSE180 | exonic          | <i>MUC16</i>   | nonsynonymous SNV   | NM_024690:c.C20482T;p.P6828S   |                | chr19 | 9066964   | 9066964   | G | A | 0.363636364 | 0.35 | 110 | 40 |
| KYSE180 | exonic          | <i>MKI67</i>   | nonsynonymous SNV   | NM_001145966:c.T4867C;p.S1623P |                | chr10 | 129904157 | 129904157 | A | G | 0.364341085 | 0.47 | 129 | 47 |
| KYSE180 | exonic          | <i>IL16</i>    | nonsynonymous SNV   | NM_172217:c.C393G;p.C131W      |                | chr15 | 81552193  | 81552193  | C | G | 0.379746835 | 0.47 | 79  | 30 |
| KYSE180 | exonic          | <i>PTEN</i>    | nonsynonymous SNV   | NM_000314:c.G58A;p.G20R        | 753569;847650  | chr10 | 89624284  | 89624284  | G | A | 0.385416667 | 0.57 | 96  | 37 |
| KYSE180 | exonic          | <i>LRPIB</i>   | stopgain SNV        | NM_018557:c.C3443A;p.S1148X    |                | chr2  | 141665523 | 141665523 | G | T | 0.391891892 | 0.66 | 74  | 29 |
| KYSE180 | exonic          | <i>HYDIN</i>   | nonsynonymous SNV   | NM_032821:c.G7666A;p.E2556K    |                | chr16 | 70954610  | 70954610  | C | T | 0.413333333 | 0.23 | 75  | 31 |
| KYSE180 | exonic          | <i>MTERFD1</i> | nonsynonymous SNV   | NM_015942:c.A933T;p.E311D      |                | chr8  | 97256273  | 97256273  | T | A | 0.428571429 | 0.41 | 161 | 69 |
| KYSE180 | exonic          | <i>DNAH10</i>  | nonsynonymous SNV   | NM_207437:c.C4679T;p.S1560L    |                | chr12 | 124323133 | 124323133 | C | T | 0.431372549 | 0.55 | 51  | 22 |
| KYSE180 | exonic          | <i>BDP1</i>    | nonsynonymous SNV   | NM_018429:c.G2533A;p.A845T     |                | chr5  | 70805452  | 70805452  | G | A | 0.434782609 | 0.48 | 92  | 40 |
| KYSE180 | exonic          | <i>ZNF717</i>  | nonsynonymous SNV   | NM_001128223:c.C1549T;p.R517C  |                | chr3  | 75787225  | 75787225  | G | A | 0.439716312 | 0.55 | 141 | 62 |
| KYSE180 | exonic          | <i>GPR98</i>   | stopgain SNV        | NM_032119:c.A5065T;p.K1689X    |                | chr5  | 89970006  | 89970006  | A | T | 0.443298969 | 0.40 | 97  | 43 |
| KYSE180 | exonic          | <i>DNMT1</i>   | frameshift deletion | NM_001379:c.906delA;p.K302fs   |                | chr19 | 10273397  | 10273397  | T | - | 0.513761468 | 0.63 | 109 | 56 |
| KYSE180 | exonic          | <i>SSFA2</i>   | nonsynonymous SNV   | NM_001130445:c.C272A;p.A91D    |                | chr2  | 182760771 | 182760771 | C | A | 0.617391304 | 0.61 | 115 | 71 |
| KYSE180 | exonic;splicing | <i>ABCA9</i>   | nonsynonymous SNV   | NM_080283:c.G469T;p.A157S      |                | chr17 | 67041313  | 67041313  | C | A | 0.622641509 | 0.83 | 106 | 66 |
| KYSE180 | exonic          | <i>HIRA</i>    | nonsynonymous SNV   | NM_003325:c.T2642C;p.L881P     |                | chr22 | 19341561  | 19341561  | A | G | 0.631578947 | 0.50 | 19  | 12 |
| KYSE180 | exonic          | <i>BRIP1</i>   | nonsynonymous SNV   | NM_032043:c.G1442A;p.G481D     |                | chr17 | 59870989  | 59870989  | C | T | 0.637362637 | 0.67 | 91  | 58 |
| KYSE180 | exonic          | <i>MUC2</i>    | nonsynonymous SNV   | NM_002457:c.G4534A;p.A1512T    |                | chr11 | 1092715   | 1092715   | G | A | 0.64516129  | 0.60 | 31  | 20 |
| KYSE180 | exonic          | <i>SCN5A</i>   | nonsynonymous SNV   | NM_000335:c.G1186C;p.V396L     |                | chr3  | 38647594  | 38647594  | C | G | 0.65625     | 0.10 | 32  | 21 |
| KYSE180 | exonic          | <i>A2M</i>     | nonsynonymous SNV   | NM_000014:c.A3494G;p.E1165G    |                | chr12 | 9229390   | 9229390   | T | C | 0.659090909 | 0.50 | 88  | 58 |
| KYSE180 | exonic          | <i>MYCBP2</i>  | nonsynonymous SNV   | NM_015057:c.A5887T;p.I1963F    |                | chr13 | 77743757  | 77743757  | T | A | 0.666666667 | 0.82 | 99  | 66 |
| KYSE180 | exonic          | <i>IFLTD1</i>  | nonsynonymous SNV   | NM_001145727:c.T658A;p.F220I   |                | chr12 | 25672898  | 25672898  | A | T | 0.691056911 | 0.41 | 123 | 85 |
| KYSE180 | exonic          | <i>MUC4</i>    | nonsynonymous SNV   | NM_018406:c.C11468T;p.T3823L   |                | chr3  | 195506983 | 195506983 | G | A | 0.75        | 0.50 | 24  | 18 |
| KYSE180 | exonic          | <i>DNAH5</i>   | nonsynonymous SNV   | NM_001369:c.G4309T;p.V1437L    |                | chr5  | 13865823  | 13865823  | C | A | 0.819148936 | 0.68 | 94  | 77 |
| KYSE180 | exonic          | <i>PDZD2</i>   | nonsynonymous SNV   | NM_178140:c.C629T;p.A210V      | 1430358        | chr5  | 31983413  | 31983413  | C | T | 0.820224719 | 0.44 | 89  | 73 |
| KYSE180 | exonic          | <i>KDM6A</i>   | stopgain SNV        | NM_021140:c.C997T;p.Q333X      | 715;907318;908 | chrX  | 44918514  | 44918514  | C | T | 0.977777778 | 0.73 | 45  | 44 |
| KYSE180 | exonic          | <i>HUWE1</i>   | nonsynonymous SNV   | NM_031407:c.G9169T;p.D3057Y    |                | chrX  | 53578078  | 53578078  | C | A | 1           | 0.40 | 20  | 20 |
| KYSE180 | exonic          | <i>NFE2L2</i>  | nonsynonymous SNV   | NM_001145412:c.A182T;p.D61V    | 543;1580994;15 | chr2  | 178098815 | 178098815 | T | A | 1           | 0.44 | 64  | 64 |
| KYSE180 | exonic          | <i>PTPRK</i>   | nonsynonymous SNV   | NM_002844:c.G3560A;p.R1187Q    |                | chr6  | 128302412 | 128302412 | C | T | 1           | 0.35 | 54  | 54 |
| KYSE180 | exonic          | <i>TP53</i>    | nonsynonymous SNV   | NM_001126115:c.T188C;p.I63T    | 5371;1287294;1 | chr17 | 7578265   | 7578265   | A | G | 1           | 0.40 | 62  | 62 |
| KYSE180 | exonic          | <i>ZNF831</i>  | nonsynonymous SNV   | NM_178457:c.T605C;p.L202P      |                | chr20 | 57766679  | 57766679  | T | C | 1           | 0.29 | 17  | 17 |
| KYSE450 | exonic          | <i>MUC6</i>    | nonsynonymous SNV   | NM_005961:c.C5666T;p.T1889I    |                | chr11 | 1017135   | 1017135   | G | A | 0.080536913 | 0.08 | 149 | 12 |
| KYSE450 | exonic          | <i>MUC4</i>    | nonsynonymous SNV   | NM_018406:c.A10382G;p.D3461G   |                | chr3  | 195508069 | 195508069 | T | C | 0.081081081 | 0.67 | 74  | 6  |
| KYSE450 | exonic          | <i>MLL3</i>    | nonsynonymous SNV   | NM_170606:c.G943T;p.G315C      |                | chr7  | 151970859 | 151970859 | C | A | 0.082987552 | 0.45 | 241 | 20 |
| KYSE450 | exonic          | <i>MUC6</i>    | nonsynonymous SNV   | NM_005961:c.C5912T;p.P1971L    |                | chr11 | 1016889   | 1016889   | G | A | 0.085106383 | 0.55 | 235 | 20 |
| KYSE450 | exonic          | <i>MUC4</i>    | nonsynonymous SNV   | NM_018406:c.T332A;p.M111K      |                | chr3  | 195518119 | 195518119 | A | T | 0.086021505 | 0.50 | 93  | 8  |
| KYSE450 | exonic          | <i>MUC2</i>    | nonsynonymous SNV   | NM_002457:c.C4679T;p.T1560M    |                | chr11 | 1092860   | 1092860   | C | T | 0.088983051 | 0.86 | 236 | 21 |
| KYSE450 | exonic          | <i>TEX2</i>    | nonsynonymous SNV   | NM_018469:c.C965G;p.S322C      |                | chr17 | 62290613  | 62290613  | G | C | 0.089108911 | 0.56 | 101 | 9  |
| KYSE450 | exonic          | <i>MUC4</i>    | nonsynonymous SNV   | NM_018406:c.C8734A;p.P2912T    |                | chr3  | 195509717 | 195509717 | G | T | 0.090361446 | 0.47 | 166 | 15 |
| KYSE450 | exonic          | <i>MUC6</i>    | nonsynonymous SNV   | NM_005961:c.C4889T;p.T1630I    |                | chr11 | 1017912   | 1017912   | G | A | 0.094444444 | 0.35 | 180 | 17 |
| KYSE450 | exonic          | <i>MUC2</i>    | nonsynonymous SNV   | NM_002457:c.C5114T;p.T1705I    |                | chr11 | 1093295   | 1093295   | C | T | 0.096296296 | 0.54 | 135 | 13 |
| KYSE450 | exonic          | <i>MUC2</i>    | nonsynonymous SNV   | NM_002457:c.C4703T;p.T1568M    |                | chr11 | 1092884   | 1092884   | C | T | 0.097472924 | 0.63 | 277 | 27 |
| KYSE450 | exonic          | <i>MLL3</i>    | nonsynonymous SNV   | NM_170606:c.C2656T;p.R886C     |                | chr7  | 151933015 | 151933015 | G | A | 0.097560976 | 0.25 | 82  | 8  |
| KYSE450 | exonic          | <i>DNAH5</i>   | nonsynonymous SNV   | NM_001369:c.A11844C;p.E3948D   |                | chr5  | 13729587  | 13729587  | T | G | 0.098039216 | 0.27 | 153 | 15 |
| KYSE450 | exonic          | <i>FAT3</i>    | nonsynonymous SNV   | NM_001008781:c.G391C;p.G131R   |                | chr11 | 92085669  | 92085669  | G | C | 0.101754386 | 0.59 | 285 | 29 |

|         |                 |        |                      |                                                       |               |       |           |           |          |         |             |      |     |     |
|---------|-----------------|--------|----------------------|-------------------------------------------------------|---------------|-------|-----------|-----------|----------|---------|-------------|------|-----|-----|
| KYSE450 | exonic          | MUC4   | nonsynonymous SNV    | NM_018406:c.C11127G;p.H3709Q                          |               | chr3  | 195507324 | 195507324 | G        | C       | 0.102564103 | 0.33 | 117 | 12  |
| KYSE450 | exonic          | MUC4   | nonsynonymous SNV    | NM_018406:c.A5464C;p.T1822P                           |               | chr3  | 195512987 | 195512987 | T        | G       | 0.103139013 | 0.43 | 223 | 23  |
| KYSE450 | exonic          | MUC6   | nonsynonymous SNV    | NM_005961:c.C5494T;p.P18325I                          |               | chr11 | 1017307   | 1017307   | G        | A       | 0.109589041 | 0.50 | 146 | 16  |
| KYSE450 | exonic          | MUC4   | nonsynonymous SNV    | NM_018406:c.A11128G;p.T3710A                          |               | chr3  | 195507323 | 195507323 | T        | C       | 0.110091743 | 0.33 | 109 | 12  |
| KYSE450 | exonic          | MUC4   | nonsynonymous SNV    | NM_018406:c.C4801G;p.L1601V                           |               | chr3  | 195513650 | 195513650 | G        | C       | 0.111842105 | 0.65 | 152 | 17  |
| KYSE450 | exonic          | OR6Q1  | nonsynonymous SNV    | NM_001005186:c.T322C;p.F108L                          |               | chr11 | 57798746  | 57798746  | T        | C       | 0.113924051 | 0.44 | 79  | 9   |
| KYSE450 | exonic          | MUC4   | nonsynonymous SNV    | NM_018406:c.G4936A;p.A1646T                           | 1645683       | chr3  | 195513515 | 195513515 | C        | T       | 0.12        | 0.93 | 125 | 15  |
| KYSE450 | exonic          | MUC4   | nonsynonymous SNV    | NM_018406:c.G8775C;p.Q2925H                           | 1645684       | chr3  | 195509676 | 195509676 | C        | G       | 0.120805369 | 0.56 | 149 | 18  |
| KYSE450 | exonic          | OR6Q1  | nonsynonymous SNV    | NM_001005186:c.T320A;p.I107N                          |               | chr11 | 57798744  | 57798744  | T        | A       | 0.12195122  | 0.50 | 82  | 10  |
| KYSE450 | exonic          | PCLO   | nonsynonymous SNV    | NM_014510:c.A8782G;p.K2928E                           |               | chr7  | 82581487  | 82581487  | T        | C       | 0.12195122  | 0.80 | 82  | 10  |
| KYSE450 | exonic          | LGR6   | nonsynonymous SNV    | NM_001017404:c.G473A;p.G158E                          |               | chr1  | 202270324 | 202270324 | G        | A       | 0.125       | 0.67 | 72  | 9   |
| KYSE450 | exonic          | TPTE   | nonsynonymous SNV    | NM_199260:c.C1535G;p.S512C                            |               | chr21 | 10906912  | 10906912  | G        | C       | 0.12804878  | 0.71 | 164 | 21  |
| KYSE450 | exonic          | MUC4   | nonsynonymous SNV    | NM_018406:c.C8282T;p.A2761V                           |               | chr3  | 195510169 | 195510169 | G        | A       | 0.134920635 | 0.71 | 126 | 17  |
| KYSE450 | exonic          | ZN7F17 | frameshift insertion | NM_001128223:c.2739_2740insT;p.F913fs                 |               | chr3  | 75786035  | 75786035  | -        | A       | 0.13559322  | 0.88 | 59  | 8   |
| KYSE450 | exonic          | PCLO   | nonsynonymous SNV    | NM_014510:c.A8781T;p.E2927D                           |               | chr7  | 82581488  | 82581488  | T        | A       | 0.135802469 | 0.73 | 81  | 11  |
| KYSE450 | exonic          | EPPK1  | nonsynonymous SNV    | NM_031308:c.G7132C;p.D2378H                           |               | chr8  | 144940290 | 144940290 | C        | G       | 0.137254902 | 0.67 | 153 | 21  |
| KYSE450 | exonic          | MUC2   | nonsynonymous SNV    | NM_002457:c.A4678C;p.T1560P                           |               | chr11 | 1092859   | 1092859   | A        | C       | 0.140090901 | 0.87 | 220 | 31  |
| KYSE450 | exonic          | TIN    | nonsynonymous SNV    | NM_003319:c.T69630A;p.F23210L                         |               | chr2  | 179407875 | 179407875 | A        | T       | 0.152777778 | 0.64 | 72  | 11  |
| KYSE450 | exonic          | FSIP2  | nonsynonymous SNV    | NM_173651:c.C11763A;p.D3921E                          |               | chr2  | 186665529 | 186665529 | C        | A       | 0.156862745 | 0.50 | 102 | 16  |
| KYSE450 | exonic          | LRR1Q3 | stopgain SNV         | NM_001105659:c.C1195T;p.R399X                         |               | chr1  | 74507420  | 74507420  | G        | A       | 0.158536585 | 0.54 | 82  | 13  |
| KYSE450 | exonic          | ZN7F17 | stopgain SNV         | NM_001128223:c.1730_1731insAAGTCAT;p.F577_L578delinsX |               | chr3  | 75787044  | 75787044  | -        | ATGACTT | 0.162037037 | 0.14 | 216 | 35  |
| KYSE450 | exonic          | MUC4   | nonsynonymous SNV    | NM_018406:c.A3037G;p.S1013G                           | 81;1645683;16 | chr3  | 195515414 | 195515414 | T        | C       | 0.170212766 | 0.25 | 47  | 8   |
| KYSE450 | exonic          | TRIO   | nonsynonymous SNV    | NM_007118:c.A3214G;p.K1072E                           |               | chr5  | 14369630  | 14369630  | A        | G       | 0.173913043 | 0.13 | 46  | 8   |
| KYSE450 | exonic          | PDZRN3 | nonsynonymous SNV    | NM_015009:c.C827T;p.S276L                             |               | chr3  | 73651596  | 73651596  | G        | A       | 0.181818182 | 0.38 | 44  | 8   |
| KYSE450 | exonic          | FAT3   | nonsynonymous SNV    | NM_001008781:c.C5220G;p.I1740M                        |               | chr11 | 92531399  | 92531399  | C        | G       | 0.194736842 | 0.27 | 190 | 37  |
| KYSE450 | exonic          | FMN2   | nonsynonymous SNV    | NM_020066:c.C2343A;p.F781L                            |               | chr1  | 240370455 | 240370455 | C        | A       | 0.207317073 | 0.35 | 82  | 17  |
| KYSE450 | exonic          | ATAD2  | nonsynonymous SNV    | NM_014109:c.T4019C;p.V1340A                           |               | chr8  | 124335290 | 124335290 | A        | G       | 0.208633094 | 0.31 | 139 | 29  |
| KYSE450 | exonic          | PLEC   | nonsynonymous SNV    | NM_201378:c.G10480A;p.D3494N                          |               | chr8  | 144993467 | 144993467 | C        | T       | 0.226415094 | 0.42 | 53  | 12  |
| KYSE450 | exonic          | DNAH5  | nonsynonymous SNV    | NM_001369:c.G8530A;p.D2844N                           |               | chr5  | 13788942  | 13788942  | C        | T       | 0.228136882 | 0.57 | 263 | 60  |
| KYSE450 | exonic          | MTMR4  | nonsynonymous SNV    | NM_004687:c.G2777A;p.R926Q                            |               | chr17 | 56572726  | 56572726  | C        | T       | 0.230769231 | 0.61 | 78  | 18  |
| KYSE450 | exonic          | PLXNA1 | nonsynonymous SNV    | NM_032242:c.G3337C;p.V1113L                           |               | chr3  | 126736328 | 126736328 | G        | C       | 0.230769231 | 0.83 | 26  | 6   |
| KYSE450 | exonic          | KIT    | nonsynonymous SNV    | NM_000222:c.C695T;p.T232M                             |               | chr4  | 55565871  | 55565871  | C        | T       | 0.238636364 | 0.67 | 88  | 21  |
| KYSE450 | exonic          | TP53   | stopgain SNV         | NM_001126115:c.G619T;p.E207X                          | 0566;946371;1 | chr17 | 7574012   | 7574012   | C        | A       | 0.242424242 | 0.38 | 33  | 8   |
| KYSE450 | exonic          | FAT3   | nonsynonymous SNV    | NM_001008781:c.A359G;p.E120G                          |               | chr11 | 92085637  | 92085637  | A        | G       | 0.253333333 | 0.46 | 225 | 57  |
| KYSE450 | exonic          | ZN7F17 | nonsynonymous SNV    | NM_001128223:c.A973G;p.S325G                          |               | chr3  | 75787801  | 75787801  | T        | C       | 0.260869565 | 0.90 | 161 | 42  |
| KYSE450 | exonic          | APCDD1 | nonsynonymous SNV    | NM_153000:c.C1019A;p.S340Y                            |               | chr18 | 10485703  | 10485703  | C        | A       | 0.263157895 | 0.20 | 38  | 10  |
| KYSE450 | exonic          | DIP2B  | nonsynonymous SNV    | NM_173602:c.A4256T;p.N1419I                           |               | chr12 | 51133271  | 51133271  | A        | T       | 0.276315789 | 0.33 | 76  | 21  |
| KYSE450 | exonic          | NLRP1  | nonsynonymous SNV    | NM_033006:c.G2911A;p.G971R                            |               | chr17 | 5437268   | 5437268   | C        | T       | 0.276595745 | 0.46 | 94  | 26  |
| KYSE450 | exonic          | ARID1A | frameshift deletion  | NM_006015:c.S013_5034del;p.1671_1678del               |               | chr1  | 27102087  | 27102108  | ATGTCCCT | -       | 0.28        | 0.57 | 25  | 7   |
| KYSE450 | exonic          | NF1    | nonsynonymous SNV    | NM_000267:c.G4134T;p.Q1378H                           | 8450;949171;1 | chr17 | 29585385  | 29585385  | G        | T       | 0.285714286 | 0.63 | 112 | 32  |
| KYSE450 | exonic          | DNAH6  | nonsynonymous SNV    | NM_001370:c.A6407C;p.Q2136P                           |               | chr2  | 84897552  | 84897552  | A        | C       | 0.292857143 | 0.46 | 140 | 41  |
| KYSE450 | exonic          | ZN7F17 | nonsynonymous SNV    | NM_001128223:c.T400A;p.F134I                          |               | chr3  | 75788374  | 75788374  | A        | T       | 0.293868922 | 0.48 | 473 | 139 |
| KYSE450 | exonic          | IGSF10 | nonsynonymous SNV    | NM_001178145:c.C1858G;p.Q620E                         |               | chr3  | 151154572 | 151154572 | G        | C       | 0.296610169 | 0.37 | 118 | 35  |
| KYSE450 | exonic          | ABCA13 | nonsynonymous SNV    | NM_152701:c.A4129T;p.T1375S                           |               | chr7  | 48313392  | 48313392  | A        | T       | 0.299465241 | 0.48 | 187 | 56  |
| KYSE450 | exonic          | MLL3   | stopgain SNV         | NM_170606:c.C7615T;p.Q2539X                           |               | chr7  | 151874923 | 151874923 | G        | A       | 0.303921569 | 0.35 | 102 | 31  |
| KYSE450 | exonic          | SAMD9L | nonsynonymous SNV    | NM_152703:c.C1892T;p.S631L                            |               | chr7  | 92763393  | 92763393  | G        | A       | 0.310679612 | 0.55 | 206 | 64  |
| KYSE450 | exonic          | TAF1L  | nonsynonymous SNV    | NM_153809:c.C4266G;p.H1422Q                           |               | chr9  | 32631312  | 32631312  | G        | C       | 0.32        | 0.40 | 125 | 40  |
| KYSE450 | exonic          | MRPL20 | nonsynonymous SNV    | NM_017971:c.A266C;p.N89T                              |               | chr1  | 1341199   | 1341199   | T        | G       | 0.33        | 0.58 | 100 | 33  |
| KYSE450 | exonic          | BCL6   | frameshift deletion  | NM_001130845:c.1623_1624del;p.541_542del              |               | chr3  | 187444603 | 187444604 | TG       | -       | 0.346153846 | 0.56 | 26  | 9   |
| KYSE450 | exonic          | EPHB1  | nonsynonymous SNV    | NM_004441:c.G88A;p.A30T                               |               | chr3  | 134644687 | 134644687 | G        | A       | 0.346456693 | 0.75 | 127 | 44  |
| KYSE450 | exonic          | DNAH9  | nonsynonymous SNV    | NM_001372:c.T2591C;p.V864A                            |               | chr17 | 11556315  | 11556315  | T        | C       | 0.363636364 | 0.56 | 143 | 52  |
| KYSE450 | exonic          | PRDM9  | stopgain SNV         | NM_020227:c.C835T;p.R279X                             |               | chr5  | 23522947  | 23522947  | C        | T       | 0.368421053 | 0.62 | 57  | 21  |
| KYSE450 | exonic          | ZN7F17 | nonsynonymous SNV    | NM_030580:c.A717T;p.K239N                             |               | chr8  | 145999617 | 145999617 | T        | A       | 0.368421053 | 0.86 | 19  | 7   |
| KYSE450 | exonic splicing | ABCA8  | nonsynonymous SNV    | NM_007168:c.G4155T;p.K1385N                           |               | chr17 | 66872769  | 66872769  | C        | A       | 0.369747899 | 0.61 | 119 | 44  |
| KYSE450 | exonic          | ALK    | nonsynonymous SNV    | NM_004304:c.G2773A;p.G925R                            |               | chr2  | 29451792  | 29451792  | C        | T       | 0.375       | 0.50 | 16  | 6   |
| KYSE450 | exonic          | ABCA13 | nonsynonymous SNV    | NM_152701:c.C13468G;p.H4490D                          |               | chr7  | 48547589  | 48547589  | C        | G       | 0.380952381 | 0.63 | 84  | 32  |
| KYSE450 | exonic          | SIN3A  | nonsynonymous SNV    | NM_001145357:c.G3076T;p.A1026S                        |               | chr15 | 75676724  | 75676724  | C        | A       | 0.380952381 | 0.38 | 42  | 16  |
| KYSE450 | exonic          | DNAH6  | nonsynonymous SNV    | NM_001370:c.G5571T;p.K1857N                           |               | chr2  | 84880935  | 84880935  | G        | T       | 0.387387387 | 0.40 | 111 | 43  |

|         |                 |                |                     |                                                       |               |       |           |           |      |         |             |      |     |     |
|---------|-----------------|----------------|---------------------|-------------------------------------------------------|---------------|-------|-----------|-----------|------|---------|-------------|------|-----|-----|
| KYSE450 | exonic          | <i>ABCB1</i>   | nonsynonymous SNV   | NM_000927:c.T2651G:p.L884R                            |               | chr7  | 87160644  | 87160644  | A    | C       | 0.405797101 | 0.57 | 138 | 56  |
| KYSE450 | exonic          | <i>ANK2</i>    | nonsynonymous SNV   | NM_001148:c.C1567T:p.P523S                            |               | chr4  | 114195689 | 114195689 | C    | T       | 0.416666667 | 0.50 | 24  | 10  |
| KYSE450 | exonic          | <i>DQXI</i>    | nonsynonymous SNV   | NM_133637:c.G514A:p.A172T                             |               | chr2  | 74751352  | 74751352  | C    | T       | 0.426229508 | 0.42 | 61  | 26  |
| KYSE450 | exonic          | <i>TTN</i>     | nonsynonymous SNV   | NM_003319:c.C37751T:p.P12584L                         |               | chr2  | 179449422 | 179449422 | G    | A       | 0.447619048 | 0.60 | 105 | 47  |
| KYSE450 | exonic          | <i>AHNAK2</i>  | nonsynonymous SNV   | NM_138420:c.A4594C:p.M1532L                           |               | chr14 | 105417194 | 105417194 | T    | G       | 0.448717949 | 0.51 | 78  | 35  |
| KYSE450 | splicing        | <i>OTOGL</i>   |                     |                                                       |               | chr12 | 80730691  | 80730691  | G    | A       | 0.459459459 | 0.67 | 111 | 51  |
| KYSE450 | exonic          | <i>OTOGL</i>   | stopgain SNV        | NM_173591:c.G3763T:p.E1255X                           |               | chr12 | 80712481  | 80712481  | G    | T       | 0.5         | 0.34 | 58  | 29  |
| KYSE450 | exonic          | <i>TMEM232</i> | stopgain SNV        | NM_001039763:c.T510G:p.Y170X                          |               | chr5  | 109963573 | 109963573 | A    | C       | 0.55952381  | 0.30 | 84  | 47  |
| KYSE450 | exonic          | <i>TTN</i>     | nonsynonymous SNV   | NM_003319:c.T47009C:p.V15670A                         |               | chr2  | 179436655 | 179436655 | A    | G       | 0.564102564 | 0.45 | 39  | 22  |
| KYSE450 | exonic          | <i>SPEN</i>    | nonsynonymous SNV   | NM_015001:c.T3926G:p.F1309C                           |               | chr1  | 16256661  | 16256661  | T    | G       | 0.592592593 | 0.53 | 108 | 64  |
| KYSE450 | exonic          | <i>MUC2</i>    | nonsynonymous SNV   | NM_002457:c.G4534A:p.A1512T                           |               | chr11 | 1092715   | 1092715   | G    | A       | 0.6         | 0.61 | 30  | 18  |
| KYSE450 | exonic          | <i>HYDIN</i>   | nonsynonymous SNV   | NM_032821:c.A10801G:p.I3601V                          |               | chr16 | 70908352  | 70908352  | T    | C       | 0.605150215 | 0.50 | 233 | 141 |
| KYSE450 | exonic          | <i>TP53</i>    | nonsynonymous SNV   | NM_001126115:c.A140G:p.H47R                           | 09707:909771; | chr17 | 7578394   | 7578394   | T    | C       | 0.681818182 | 0.40 | 44  | 30  |
| KYSE450 | exonic          | <i>FBXO11</i>  | nonsynonymous SNV   | NM_001190274:c.G451T:p.A151S                          | 753548        | chr2  | 48066134  | 48066134  | C    | A       | 0.712       | 0.39 | 125 | 89  |
| KYSE450 | exonic          | <i>OBSCN</i>   | nonsynonymous SNV   | NM_001098623:c.G11813A:p.R3938Q                       |               | chr1  | 228494226 | 228494226 | G    | A       | 0.818181818 | 0.78 | 11  | 9   |
| KYSE450 | exonic          | <i>NOTCH1</i>  | frameshift deletion | NM_017617:c.G6166_6167del:p.2056_2056del              | 907320        | chr9  | 139393364 | 139393365 | AT   | -       | 0.946428571 | 0.74 | 56  | 53  |
| KYSE450 | exonic          | <i>MLL2</i>    | frameshift deletion | NM_003482:c.L5463_15466del:p.5155_5156del             |               | chr12 | 49420283  | 49420286  | AGAC | -       | 0.947368421 | 0.72 | 76  | 72  |
| KYSE450 | exonic          | <i>FANCC</i>   | nonsynonymous SNV   | NM_000136:c.C733T:p.R245W                             |               | chr9  | 97897738  | 97897738  | G    | A       | 1           | 0.39 | 109 | 109 |
| KYSE450 | exonic          | <i>NOTCH1</i>  | nonsynonymous SNV   | NM_017617:c.G344A:p.G115D                             |               | chr9  | 139418228 | 139418228 | C    | T       | 1           | 0.71 | 17  | 17  |
| KYSE450 | exonic          | <i>NUP210</i>  | nonsynonymous SNV   | NM_024923:c.C3909G:p.N1303K                           |               | chr3  | 13373819  | 13373819  | G    | C       | 1           | 0.59 | 56  | 56  |
| KYSE450 | splicing        | <i>RPS6KA6</i> |                     |                                                       |               | chrX  | 83351201  | 83351201  | C    | T       | 1           | 0.82 | 45  | 45  |
| KYSE450 | exonic          | <i>VPS13B</i>  | nonsynonymous SNV   | NM_017890:c.G8903A:p.R2968Q                           |               | chr8  | 100832184 | 100832184 | G    | A       | 1           | 0.54 | 92  | 92  |
| KYSE510 | exonic          | <i>SYNE1</i>   | nonsynonymous SNV   | NM_033071:c.G21040A:p.G7014R                          |               | chr6  | 152546954 | 152546954 | C    | T       | 0.080357143 | 0.56 | 112 | 9   |
| KYSE510 | exonic          | <i>MUC4</i>    | nonsynonymous SNV   | NM_018406:c.C7541A:p.P2514H                           |               | chr3  | 195510910 | 195510910 | G    | T       | 0.081504702 | 0.77 | 319 | 26  |
| KYSE510 | exonic          | <i>MUC4</i>    | nonsynonymous SNV   | NM_018406:c.A11128G:p.T3710A                          |               | chr3  | 195507323 | 195507323 | T    | C       | 0.086206897 | 0.50 | 232 | 20  |
| KYSE510 | exonic          | <i>PCLO</i>    | nonsynonymous SNV   | NM_014510:c.A8782G:p.K2928E                           |               | chr7  | 82581487  | 82581487  | T    | C       | 0.086956522 | 0.60 | 115 | 10  |
| KYSE510 | exonic          | <i>MUC4</i>    | nonsynonymous SNV   | NM_018406:c.C11127G:p.H3709Q                          |               | chr3  | 195507324 | 195507324 | G    | C       | 0.088353414 | 0.55 | 249 | 22  |
| KYSE510 | exonic          | <i>MLL3</i>    | nonsynonymous SNV   | NM_170606:c.G1181A:p.C394Y                            |               | chr7  | 151962126 | 151962126 | C    | T       | 0.089108911 | 0.89 | 101 | 9   |
| KYSE510 | exonic          | <i>OTOA</i>    | stopgain SNV        | NM_170664:c.G1387T:p.E463X                            |               | chr16 | 21747639  | 21747639  | G    | T       | 0.090909091 | 0.92 | 143 | 13  |
| KYSE510 | exonic          | <i>PCLO</i>    | nonsynonymous SNV   | NM_014510:c.A8781T:p.E2927D                           |               | chr7  | 82581488  | 82581488  | T    | A       | 0.094017094 | 0.64 | 117 | 11  |
| KYSE510 | exonic          | <i>MUC16</i>   | nonsynonymous SNV   | NM_024690:c.C26641T:p.L8881F                          |               | chr19 | 9060805   | 9060805   | G    | A       | 0.1         | 0.40 | 100 | 10  |
| KYSE510 | exonic          | <i>UNC79</i>   | nonsynonymous SNV   | NM_020818:c.G3433A:p.E1145K                           |               | chr14 | 94079352  | 94079352  | G    | A       | 0.101010101 | 0.60 | 99  | 10  |
| KYSE510 | exonic          | <i>MUC4</i>    | nonsynonymous SNV   | NM_018406:c.C8734A:p.P2912T                           |               | chr3  | 195509717 | 195509717 | G    | T       | 0.107142857 | 0.46 | 224 | 24  |
| KYSE510 | exonic          | <i>ZNF717</i>  | stopgain SNV        | NM_001128223:c.1730_1731insAAGTCAT:p.F577_L578delinsX |               | chr3  | 75787044  | 75787044  | -    | ATGACTT | 0.107142857 | 0.19 | 196 | 21  |
| KYSE510 | exonic          | <i>MUC4</i>    | nonsynonymous SNV   | NM_018406:c.T8572C:p.S2858P                           |               | chr3  | 195509879 | 195509879 | A    | G       | 0.107692308 | 0.67 | 195 | 21  |
| KYSE510 | exonic          | <i>FBN2</i>    | nonsynonymous SNV   | NM_001999:c.C8536G:p.R2846G                           |               | chr5  | 127595350 | 127595350 | G    | C       | 0.109090909 | 0.33 | 55  | 6   |
| KYSE510 | exonic          | <i>UNC93A</i>  | nonsynonymous SNV   | NM_001143947:c.C661G:p.L221V                          |               | chr6  | 167117568 | 167117568 | C    | G       | 0.109243697 | 0.38 | 119 | 13  |
| KYSE510 | exonic          | <i>MUC4</i>    | nonsynonymous SNV   | NM_018406:c.C11258T:p.A3753V                          |               | chr3  | 195507193 | 195507193 | G    | A       | 0.112426036 | 0.21 | 169 | 19  |
| KYSE510 | exonic          | <i>AHNAK2</i>  | nonsynonymous SNV   | NM_138420:c.G6357C:p.M2119I                           |               | chr14 | 105415431 | 105415431 | C    | G       | 0.112676056 | 0.94 | 142 | 16  |
| KYSE510 | exonic          | <i>ZNF717</i>  | nonsynonymous SNV   | NM_001128223:c.A1436G:p.Y479C                         |               | chr3  | 75787338  | 75787338  | T    | C       | 0.113636364 | 0.60 | 88  | 10  |
| KYSE510 | exonic          | <i>HYDIN</i>   | nonsynonymous SNV   | NM_032821:c.C8830T:p.R2944W                           |               | chr16 | 70937544  | 70937544  | G    | A       | 0.113821138 | 0.57 | 123 | 14  |
| KYSE510 | exonic          | <i>TTN</i>     | nonsynonymous SNV   | NM_003319:c.G15448C:p.V5150L                          |               | chr2  | 179498583 | 179498583 | C    | G       | 0.118343195 | 0.50 | 169 | 20  |
| KYSE510 | exonic          | <i>LRP1B</i>   | nonsynonymous SNV   | NM_018557:c.G11435A:p.C3812Y                          |               | chr2  | 141114006 | 141114006 | C    | T       | 0.12        | 0.50 | 150 | 18  |
| KYSE510 | exonic          | <i>UNC79</i>   | stopgain SNV        | NM_020818:c.C2074T:p.Q692X                            |               | chr14 | 94046666  | 94046666  | C    | T       | 0.122807018 | 0.43 | 114 | 14  |
| KYSE510 | exonic          | <i>DROSHA</i>  | nonsynonymous SNV   | NM_001100412:c.C11166T:p.P389L                        |               | chr5  | 31515108  | 31515108  | G    | A       | 0.125925926 | 0.71 | 135 | 17  |
| KYSE510 | exonic          | <i>MUC2</i>    | nonsynonymous SNV   | NM_002457:c.C5168T:p.P1723L                           |               | chr11 | 1093349   | 1093349   | C    | T       | 0.12749004  | 0.63 | 251 | 32  |
| KYSE510 | exonic          | <i>MUC2</i>    | nonsynonymous SNV   | NM_002457:c.A4678C:p.T1560P                           |               | chr11 | 1092859   | 1092859   | A    | C       | 0.130081301 | 0.91 | 246 | 32  |
| KYSE510 | exonic          | <i>MUC4</i>    | nonsynonymous SNV   | NM_018406:c.C8800T:p.L2934F                           |               | chr3  | 195509651 | 195509651 | G    | A       | 0.130630631 | 0.72 | 222 | 29  |
| KYSE510 | exonic          | <i>DNAH10</i>  | nonsynonymous SNV   | NM_207437:c.G4186A:p.E1396K                           |               | chr12 | 124315241 | 124315241 | G    | A       | 0.130952381 | 0.14 | 168 | 22  |
| KYSE510 | exonic          | <i>RICTOR</i>  | nonsynonymous SNV   | NM_152756:c.C1582T:p.L528F                            |               | chr5  | 38962673  | 38962673  | G    | A       | 0.131221719 | 0.24 | 221 | 29  |
| KYSE510 | exonic          | <i>MUC6</i>    | nonsynonymous SNV   | NM_005961:c.C4889T:p.T1630I                           |               | chr11 | 1017912   | 1017912   | G    | A       | 0.132978723 | 0.28 | 188 | 25  |
| KYSE510 | exonic          | <i>MYBPC1</i>  | nonsynonymous SNV   | NM_001254722:c.G1062C:p.E354D                         |               | chr12 | 102043056 | 102043056 | G    | C       | 0.133333333 | 0.72 | 135 | 18  |
| KYSE510 | exonic          | <i>GPR98</i>   | nonsynonymous SNV   | NM_032119:c.A9581C:p.Q3194P                           |               | chr5  | 90015998  | 90015998  | A    | C       | 0.136986301 | 0.50 | 73  | 10  |
| KYSE510 | exonic          | <i>MUC2</i>    | nonsynonymous SNV   | NM_002457:c.C4679T:p.T1560M                           |               | chr11 | 1092860   | 1092860   | C    | T       | 0.139622642 | 0.73 | 265 | 37  |
| KYSE510 | exonic;splicing | <i>FAM5C</i>   | nonsynonymous SNV   | NM_199051:c.G428C:p.G143A                             |               | chr1  | 190234185 | 190234185 | C    | G       | 0.140186916 | 0.33 | 107 | 15  |
| KYSE510 | exonic          | <i>RP1L1</i>   | nonsynonymous SNV   | NM_178857:c.G3935A:p.G1312E                           |               | chr8  | 10467673  | 10467673  | C    | T       | 0.140540541 | 0.27 | 185 | 26  |
| KYSE510 | exonic          | <i>SYNE2</i>   | nonsynonymous SNV   | NM_015180:c.T9023G:p.L3008S                           |               | chr14 | 64519654  | 64519654  | T    | G       | 0.142857143 | 0.48 | 280 | 40  |
| KYSE510 | exonic          | <i>C5orf42</i> | nonsynonymous SNV   | NM_023073:c.C3706T:p.P1236S                           |               | chr5  | 37196065  | 37196065  | G    | A       | 0.147982063 | 0.33 | 223 | 33  |



|         |                 |                 |                     |                                         |                |       |           |           |       |   |             |      |     |    |
|---------|-----------------|-----------------|---------------------|-----------------------------------------|----------------|-------|-----------|-----------|-------|---|-------------|------|-----|----|
| KYSE510 | exonic          | <i>SPEN</i>     | nonsynonymous SNV   | NM_015001:c.C1892T:p.T63II              |                | chr1  | 16254627  | 16254627  | C     | T | 0.152671756 | 0.70 | 131 | 20 |
| KYSE510 | exonic          | <i>CDK5RAP2</i> | nonsynonymous SNV   | NM_001011649:c.C2767T:p.L923F           |                | chr9  | 123215760 | 123215760 | G     | A | 0.159090909 | 0.50 | 88  | 14 |
| KYSE510 | splicing        | <i>YME1L1</i>   |                     |                                         |                | chr10 | 27423053  | 27423053  | T     | C | 0.160493827 | 0.46 | 81  | 13 |
| KYSE510 | exonic          | <i>NF1</i>      | nonsynonymous SNV   | NM_000267:c.A3532G:p.T1178A             | 0:949171;1282  | chr17 | 29560055  | 29560055  | A     | G | 0.163398693 | 0.48 | 153 | 25 |
| KYSE510 | exonic          | <i>MUC4</i>     | nonsynonymous SNV   | NM_018406:c.A3037G:p.S1013G             | 581;1645683;16 | chr3  | 195515414 | 195515414 | T     | C | 0.164948454 | 0.44 | 97  | 16 |
| KYSE510 | exonic:splicing | <i>USP24</i>    | nonsynonymous SNV   | NM_015306:c.G5936A:p.R1979Q             |                | chr1  | 55562625  | 55562625  | C     | T | 0.169014085 | 0.83 | 71  | 12 |
| KYSE510 | exonic          | <i>MUC4</i>     | nonsynonymous SNV   | NM_018406:c.T10946C:p.L3649P            |                | chr3  | 195507505 | 195507505 | A     | G | 0.171428571 | 0.25 | 70  | 12 |
| KYSE510 | exonic          | <i>OR4D11</i>   | nonsynonymous SNV   | NM_001004706:c.C333A:p.D111E            |                | chr11 | 59271381  | 59271381  | C     | A | 0.179104478 | 0.54 | 134 | 24 |
| KYSE510 | exonic          | <i>GPR98</i>    | nonsynonymous SNV   | NM_032119:c.G11845A:p.G3949R            |                | chr5  | 90052883  | 90052883  | G     | A | 0.189189189 | 0.57 | 111 | 21 |
| KYSE510 | exonic          | <i>ZNF554</i>   | nonsynonymous SNV   | NM_001102651:c.C512A:p.A171D            |                | chr19 | 2833745   | 2833745   | C     | A | 0.189873418 | 0.33 | 79  | 15 |
| KYSE510 | exonic          | <i>HYDIN</i>    | nonsynonymous SNV   | NM_032821:c.G6688T:p.V2230L             |                | chr16 | 70975701  | 70975701  | C     | A | 0.19266055  | 0.33 | 109 | 21 |
| KYSE510 | exonic          | <i>ZFH3</i>     | nonsynonymous SNV   | NM_001164766:c.C755T:p.P252L            |                | chr16 | 72863710  | 72863710  | G     | A | 0.194805195 | 0.60 | 154 | 30 |
| KYSE510 | exonic          | <i>MUC4</i>     | nonsynonymous SNV   | NM_018406:c.G8775C:p.Q2925H             | 1645684        | chr3  | 195509676 | 195509676 | C     | G | 0.199052133 | 0.60 | 211 | 42 |
| KYSE510 | exonic          | <i>SPHKAP</i>   | nonsynonymous SNV   | NM_001142644:c.G1727C:p.R576T           |                | chr2  | 228883843 | 228883843 | C     | G | 0.2         | 0.53 | 95  | 19 |
| KYSE510 | exonic          | <i>GDPD4</i>    | nonsynonymous SNV   | NM_182833:c.G3T:p.M1I                   |                | chr11 | 76996180  | 76996180  | C     | A | 0.201219512 | 0.36 | 164 | 33 |
| KYSE510 | exonic          | <i>ZFH3</i>     | nonsynonymous SNV   | NM_001164766:c.C754T:p.P252S            |                | chr16 | 72863711  | 72863711  | G     | A | 0.201298701 | 0.58 | 154 | 31 |
| KYSE510 | exonic          | <i>TTN</i>      | stopgain SNV        | NM_003319:c.G58299A:p.W19433X           |                | chr2  | 179425365 | 179425365 | C     | T | 0.201492537 | 0.37 | 134 | 27 |
| KYSE510 | exonic          | <i>TTN</i>      | nonsynonymous SNV   | NM_133432:c.G10345A:p.E3449K            |                | chr2  | 179622464 | 179622464 | C     | T | 0.206185567 | 0.60 | 97  | 20 |
| KYSE510 | splicing        | <i>BMPRIA</i>   |                     |                                         |                | chr10 | 88679227  | 88679227  | G     | A | 0.206896552 | 0.39 | 87  | 18 |
| KYSE510 | exonic          | <i>CDH10</i>    | nonsynonymous SNV   | NM_006727:c.C2177A:p.T726N              |                | chr5  | 24487962  | 24487962  | G     | T | 0.210227273 | 0.38 | 176 | 37 |
| KYSE510 | exonic          | <i>AKAP6</i>    | nonsynonymous SNV   | NM_004274:c.C2365A:p.D789N              |                | chr14 | 33046344  | 33046344  | G     | A | 0.212121212 | 0.69 | 165 | 35 |
| KYSE510 | exonic          | <i>DSP</i>      | nonsynonymous SNV   | NM_001008844:c.T1171A:p.Y391N           |                | chr6  | 7568044   | 7568044   | T     | A | 0.215189873 | 0.41 | 79  | 17 |
| KYSE510 | exonic          | <i>LRKK2</i>    | nonsynonymous SNV   | NM_198578:c.G472A:p.D158N               |                | chr12 | 40631806  | 40631806  | G     | A | 0.218487395 | 0.38 | 119 | 26 |
| KYSE510 | exonic          | <i>LRP1B</i>    | nonsynonymous SNV   | NM_018557:c.C3563T:p.S1188F             |                | chr2  | 141660692 | 141660692 | G     | A | 0.220588235 | 0.63 | 136 | 30 |
| KYSE510 | exonic          | <i>LCT</i>      | nonsynonymous SNV   | NM_002299:c.T3356C:p.V1119A             |                | chr2  | 136566561 | 136566561 | A     | G | 0.223684211 | 0.65 | 76  | 17 |
| KYSE510 | exonic          | <i>MGAT4C</i>   | nonsynonymous SNV   | NM_013244:c.G400A:p.E134K               |                | chr12 | 86374104  | 86374104  | C     | T | 0.2265625   | 0.45 | 128 | 29 |
| KYSE510 | exonic          | <i>CDH23</i>    | nonsynonymous SNV   | NM_022124:c.G5722A:p.V1908I             |                | chr10 | 73545397  | 73545397  | G     | A | 0.228571429 | 0.63 | 35  | 8  |
| KYSE510 | exonic          | <i>PDE6C</i>    | nonsynonymous SNV   | NM_006204:c.A647T:p.Y216F               |                | chr10 | 95380661  | 95380661  | A     | T | 0.229357798 | 0.64 | 109 | 25 |
| KYSE510 | exonic          | <i>TNN</i>      | nonsynonymous SNV   | NM_022093:c.G3152A:p.R1051K             |                | chr1  | 175097274 | 175097274 | G     | A | 0.232142857 | 0.46 | 56  | 13 |
| KYSE510 | exonic          | <i>COL22A1</i>  | nonsynonymous SNV   | NM_152888:c.T3323A:p.L1108H             |                | chr8  | 139668150 | 139668150 | A     | T | 0.234848485 | 0.48 | 132 | 31 |
| KYSE510 | exonic          | <i>EP300</i>    | nonsynonymous SNV   | NM_001429:c.C3241T:p.P1081S             |                | chr22 | 41551097  | 41551097  | C     | T | 0.235294118 | 0.20 | 187 | 44 |
| KYSE510 | exonic          | <i>SLCO1C1</i>  | nonsynonymous SNV   | NM_017435:c.G211C:p.E71Q                |                | chr12 | 20854333  | 20854333  | G     | C | 0.237704918 | 0.59 | 122 | 29 |
| KYSE510 | exonic          | <i>DNAH7</i>    | frameshift deletion | NM_018897:c.7731_7735del:p.2577_2579del |                | chr2  | 196726442 | 196726442 | TTCTT | - | 0.245901639 | 0.87 | 61  | 15 |
| KYSE510 | exonic          | <i>FMOD</i>     | nonsynonymous SNV   | NM_002023:c.C2147T:p.T716I              |                | chr1  | 203317281 | 203317281 | C     | T | 0.25        | 0.56 | 64  | 16 |
| KYSE510 | exonic          | <i>NELL1</i>    | stopgain SNV        | NM_006157:c.C1638A:p.C546X              |                | chr11 | 21392487  | 21392487  | C     | A | 0.25        | 0.27 | 88  | 22 |
| KYSE510 | exonic          | <i>KCNT2</i>    | nonsynonymous SNV   | NM_198503:c.G1715A:p.S572N              |                | chr1  | 196309539 | 196309539 | C     | T | 0.253012048 | 0.40 | 166 | 42 |
| KYSE510 | exonic          | <i>FANCA</i>    | nonsynonymous SNV   | NM_000135:c.G2712C:p.Q904H              |                | chr16 | 89831364  | 89831364  | C     | G | 0.253333333 | 0.58 | 75  | 19 |
| KYSE510 | exonic          | <i>ZNF717</i>   | nonsynonymous SNV   | NM_001128223:c.C2510A:p.T837K           |                | chr3  | 75786264  | 75786264  | G     | T | 0.256578947 | 0.38 | 152 | 39 |
| KYSE510 | exonic          | <i>MYH4</i>     | nonsynonymous SNV   | NM_017533:c.G1910A:p.G637E              |                | chr17 | 10359860  | 10359860  | C     | T | 0.257142857 | 0.33 | 140 | 36 |
| KYSE510 | exonic          | <i>CHD2</i>     | nonsynonymous SNV   | NM_001271:c.G3602C:p.G1201A             |                | chr15 | 93540193  | 93540193  | G     | C | 0.258241758 | 0.66 | 182 | 47 |
| KYSE510 | exonic          | <i>TPR</i>      | nonsynonymous SNV   | NM_003292:c.C2147T:p.T716I              |                | chr1  | 186324566 | 186324566 | G     | A | 0.258992806 | 0.61 | 139 | 36 |
| KYSE510 | exonic          | <i>HECTD1</i>   | nonsynonymous SNV   | NM_015382:c.C4532T:p.S1511L             |                | chr14 | 31598045  | 31598045  | G     | A | 0.265625    | 0.35 | 128 | 34 |
| KYSE510 | exonic          | <i>AKAP9</i>    | nonsynonymous SNV   | NM_005751:c.C9409G:p.Q3137E             |                | chr7  | 91722461  | 91722461  | C     | G | 0.266666667 | 0.44 | 60  | 16 |
| KYSE510 | exonic          | <i>GPR98</i>    | nonsynonymous SNV   | NM_032119:c.G434A:p.G145E               |                | chr5  | 89914979  | 89914979  | G     | A | 0.27        | 0.33 | 100 | 27 |
| KYSE510 | exonic          | <i>CDH1</i>     | nonsynonymous SNV   | NM_004360:c.C1280A:p.T427K              | 704:997932;100 | chr16 | 68847358  | 68847358  | C     | A | 0.27480916  | 0.36 | 131 | 36 |
| KYSE510 | exonic          | <i>DISP2</i>    | nonsynonymous SNV   | NM_033510:c.G1381A:p.G461R              |                | chr15 | 40659694  | 40659694  | G     | A | 0.277777778 | 0.30 | 36  | 10 |
| KYSE510 | exonic          | <i>EGFR</i>     | nonsynonymous SNV   | NM_005228:c.C2105A:p.A702D              |                | chr7  | 55241657  | 55241657  | C     | A | 0.28        | 0.21 | 50  | 14 |
| KYSE510 | exonic          | <i>BRCA2</i>    | nonsynonymous SNV   | NM_000059:c.G4127A:p.G1376E             |                | chr13 | 32912619  | 32912619  | G     | A | 0.281553398 | 0.59 | 103 | 29 |
| KYSE510 | exonic          | <i>IKZF2</i>    | nonsynonymous SNV   | NM_016260:c.G10A:p.E4K                  |                | chr2  | 214013344 | 214013344 | C     | T | 0.285714286 | 0.48 | 175 | 50 |
| KYSE510 | exonic          | <i>CIC</i>      | nonsynonymous SNV   | NM_015125:c.G1537A:p.E513K              |                | chr19 | 42794457  | 42794457  | G     | A | 0.290697674 | 0.40 | 86  | 25 |
| KYSE510 | exonic          | <i>GPR98</i>    | nonsynonymous SNV   | NM_032119:c.G9022C:p.D3008H             |                | chr5  | 90007119  | 90007119  | G     | C | 0.3         | 0.30 | 110 | 33 |
| KYSE510 | exonic          | <i>ARPP21</i>   | nonsynonymous SNV   | NM_016300:c.G2207A:p.G736E              |                | chr3  | 35835218  | 35835218  | G     | A | 0.305882353 | 0.69 | 85  | 26 |
| KYSE510 | exonic          | <i>MAP3K13</i>  | nonsynonymous SNV   | NM_001242317:c.C1336T:p.H446Y           |                | chr3  | 185191076 | 185191076 | C     | T | 0.30952381  | 0.35 | 84  | 26 |
| KYSE510 | splicing        | <i>KIT</i>      |                     |                                         |                | chr4  | 55598165  | 55598165  | G     | T | 0.318181818 | 0.14 | 66  | 21 |
| KYSE510 | exonic          | <i>BRCA2</i>    | nonsynonymous SNV   | NM_000059:c.G4552C:p.E1518Q             | 749713         | chr13 | 32913044  | 32913044  | G     | C | 0.322222222 | 0.45 | 90  | 29 |
| KYSE510 | exonic          | <i>GPR98</i>    | nonsynonymous SNV   | NM_032119:c.A2309G:p.D770G              |                | chr5  | 89938521  | 89938521  | A     | G | 0.325203252 | 0.43 | 123 | 40 |
| KYSE510 | exonic          | <i>PRKD1</i>    | nonsynonymous SNV   | NM_002742:c.G1796A:p.G599E              |                | chr14 | 30095692  | 30095692  | C     | T | 0.326530612 | 0.69 | 98  | 32 |
| KYSE510 | exonic          | <i>MLL2</i>     | nonsynonymous SNV   | NM_003482:c.C9389T:p.S3130F             |                | chr12 | 49431750  | 49431750  | G     | A | 0.333333333 | 0.50 | 18  | 6  |

|         |          |                 |                     |                                          |               |       |           |           |          |   |             |      |     |     |
|---------|----------|-----------------|---------------------|------------------------------------------|---------------|-------|-----------|-----------|----------|---|-------------|------|-----|-----|
| KYSE510 | exonic   | <i>DNAH8</i>    | stopgain SNV        | NM_001206927:c.G3763T:p.E1255X           |               | chr6  | 38791380  | 38791380  | G        | T | 0.34375     | 0.58 | 160 | 55  |
| KYSE510 | exonic   | <i>PTPN22</i>   | nonsynonymous SNV   | NM_012411:c.T1242A:p.F414L               |               | chr1  | 114380615 | 114380615 | A        | T | 0.348484848 | 0.54 | 132 | 46  |
| KYSE510 | exonic   | <i>MUC16</i>    | nonsynonymous SNV   | NM_024690:c.C9935T:p.S3312F              |               | chr19 | 90775111  | 90775111  | G        | A | 0.37804878  | 0.35 | 82  | 31  |
| KYSE510 | exonic   | <i>PTPRZ1</i>   | stopgain SNV        | NM_001206838:c.G147A:p.W49X              |               | chr7  | 121608027 | 121608027 | G        | A | 0.388888889 | 0.77 | 90  | 35  |
| KYSE510 | exonic   | <i>PTPRZ1</i>   | stopgain SNV        | NM_001206838:c.G146A:p.W49X              |               | chr7  | 121608026 | 121608026 | G        | A | 0.393258427 | 0.77 | 89  | 35  |
| KYSE510 | exonic   | <i>NRG3</i>     | nonsynonymous SNV   | NM_001010848:c.C1352T:p.P451L            |               | chr10 | 84733611  | 84733611  | C        | T | 0.40625     | 0.54 | 64  | 26  |
| KYSE510 | exonic   | <i>TTN</i>      | nonsynonymous SNV   | NM_003319:c.G64936C:p.V21646L            |               | chr2  | 179414318 | 179414318 | C        | G | 0.406504065 | 0.54 | 123 | 50  |
| KYSE510 | exonic   | <i>CUBN</i>     | frameshift deletion | NM_001081:c.6775_6781del:p.2259_2261del  |               | chr10 | 16962002  | 16962008  | GCTGTAT  | - | 0.409090909 | 0.67 | 22  | 9   |
| KYSE510 | exonic   | <i>LCT</i>      | nonsynonymous SNV   | NM_002299:c.G1961A:p.R654K               |               | chr2  | 136570273 | 136570273 | C        | T | 0.409090909 | 0.61 | 44  | 18  |
| KYSE510 | exonic   | <i>FLT3</i>     | nonsynonymous SNV   | NM_004119:c.G877A:p.E293K                |               | chr13 | 28623777  | 28623777  | C        | T | 0.412621359 | 0.58 | 206 | 85  |
| KYSE510 | exonic   | <i>ELAC2</i>    | nonsynonymous SNV   | NM_001165962:c.C1162T:p.R388C            |               | chr17 | 12905613  | 12905613  | G        | A | 0.414634146 | 0.65 | 41  | 17  |
| KYSE510 | splicing | <i>ENPP3</i>    |                     |                                          |               | chr6  | 132007049 | 132007049 | T        | G | 0.416666667 | 0.40 | 36  | 15  |
| KYSE510 | exonic   | <i>TTN</i>      | nonsynonymous SNV   | NM_003319:c.G35878A:p.V11960I            |               | chr2  | 179453379 | 179453379 | C        | T | 0.422619048 | 0.44 | 168 | 71  |
| KYSE510 | exonic   | <i>ALG10</i>    | nonsynonymous SNV   | NM_032834:c.T505C:p.Y169H                |               | chr12 | 34178933  | 34178933  | T        | C | 0.424778761 | 0.63 | 113 | 48  |
| KYSE510 | exonic   | <i>MUC2</i>     | nonsynonymous SNV   | NM_002457:c.G4534A:p.A1512T              |               | chr11 | 1092715   | 1092715   | G        | A | 0.43902439  | 0.56 | 41  | 18  |
| KYSE510 | exonic   | <i>TRHDE</i>    | nonsynonymous SNV   | NM_013381:c.G2984A:p.R995Q               |               | chr12 | 73056884  | 73056884  | G        | A | 0.553846154 | 0.44 | 65  | 36  |
| KYSE510 | exonic   | <i>UNC93A</i>   | nonsynonymous SNV   | NM_001143947:c.T26C:p.L9P                |               | chr6  | 167705003 | 167705003 | T        | C | 0.587209302 | 0.54 | 172 | 101 |
| KYSE510 | exonic   | <i>HEPPL1</i>   | frameshift deletion | NM_001098672:c.2259_2274del:p.753_758del |               | chr11 | 93822099  | 93822114  | GAAAAGCA | - | 0.588235294 | 0.10 | 17  | 10  |
| KYSE510 | exonic   | <i>MED13L</i>   | nonsynonymous SNV   | NM_015335:c.G3634T:p.V1212L              |               | chr12 | 116429125 | 116429125 | C        | A | 0.595238095 | 0.56 | 84  | 50  |
| KYSE510 | exonic   | <i>TP53</i>     | stopgain SNV        | NM_001126115:c.G631T:p.E211X             | 0566:946371:1 | chr17 | 7574000   | 7574000   | C        | A | 0.612244898 | 0.43 | 49  | 30  |
| KYSE510 | exonic   | <i>OR7A10</i>   | nonsynonymous SNV   | NM_001005190:c.T568C:p.S190P             |               | chr19 | 14952122  | 14952122  | A        | G | 0.620689655 | 0.52 | 87  | 54  |
| KYSE510 | exonic   | <i>ABCA8</i>    | nonsynonymous SNV   | NM_007168:c.A2069T:p.K690I               |               | chr17 | 66903970  | 66903970  | T        | A | 0.62195122  | 0.55 | 82  | 51  |
| KYSE510 | exonic   | <i>CSK</i>      | nonsynonymous SNV   | NM_004383:c.C181T:p.P61S                 |               | chr15 | 75091218  | 75091218  | C        | T | 0.625       | 0.40 | 24  | 15  |
| KYSE510 | exonic   | <i>SYNE2</i>    | nonsynonymous SNV   | NM_015180:c.C13457G:p.T4486S             |               | chr14 | 64591831  | 64591831  | C        | G | 0.626315789 | 0.55 | 190 | 119 |
| KYSE510 | exonic   | <i>ARHGAP29</i> | nonsynonymous SNV   | NM_004815:c.A1561C:p.S521R               |               | chr1  | 94654787  | 94654787  | T        | G | 0.630769231 | 0.63 | 130 | 82  |
| KYSE510 | exonic   | <i>SYNE2</i>    | nonsynonymous SNV   | NM_015180:c.A13256G:p.D4419G             |               | chr14 | 64588827  | 64588827  | A        | G | 0.631578947 | 0.45 | 190 | 120 |
| KYSE510 | exonic   | <i>C7</i>       | nonsynonymous SNV   | NM_000587:c.G1036A:p.V346I               |               | chr5  | 40950059  | 40950059  | G        | A | 0.633440514 | 0.55 | 311 | 197 |
| KYSE510 | exonic   | <i>THSD7A</i>   | nonsynonymous SNV   | NM_015204:c.G403A:p.V135M                |               | chr7  | 11676376  | 11676376  | C        | T | 0.634146341 | 0.49 | 123 | 78  |
| KYSE510 | exonic   | <i>SYNE2</i>    | nonsynonymous SNV   | NM_015180:c.C13510G:p.Q4504E             |               | chr14 | 64591884  | 64591884  | C        | G | 0.646017699 | 0.52 | 226 | 146 |
| KYSE510 | exonic   | <i>SYNE2</i>    | nonsynonymous SNV   | NM_015180:c.G9790A:p.A3264T              |               | chr14 | 64522707  | 64522707  | G        | A | 0.659217877 | 0.64 | 179 | 118 |
| KYSE510 | exonic   | <i>MYO9A</i>    | nonsynonymous SNV   | NM_006901:c.C1687T:p.H563Y               |               | chr15 | 72283479  | 72283479  | G        | A | 0.688888889 | 0.52 | 45  | 31  |
| KYSE510 | exonic   | <i>MTOR</i>     | nonsynonymous SNV   | NM_004958:c.C3622T:p.R1208C              |               | chr1  | 11270903  | 11270903  | G        | A | 0.701863354 | 0.65 | 161 | 113 |
| KYSE510 | exonic   | <i>SYNE2</i>    | nonsynonymous SNV   | NM_182910:c.C989T:p.S330L                |               | chr14 | 64691219  | 64691219  | C        | T | 0.71        | 0.56 | 100 | 71  |
| KYSE510 | exonic   | <i>MUC16</i>    | nonsynonymous SNV   | NM_024690:c.C4196T:p.T1399I              |               | chr19 | 9087619   | 9087619   | G        | A | 0.734513274 | 0.52 | 113 | 83  |
| KYSE510 | exonic   | <i>FAM205A</i>  | nonsynonymous SNV   | NM_001141917:c.G355A:p.V119M             |               | chr9  | 34726882  | 34726882  | C        | T | 0.788461538 | 0.46 | 52  | 41  |
| KYSE510 | exonic   | <i>COL11A1</i>  | nonsynonymous SNV   | NM_080629:c.G786T:p.K262N                |               | chr1  | 103491503 | 103491503 | C        | A | 0.794520548 | 0.34 | 73  | 58  |
| KYSE510 | exonic   | <i>HECTD1</i>   | nonsynonymous SNV   | NM_015382:c.C1342T:p.R448W               |               | chr14 | 31638665  | 31638665  | G        | A | 0.818584071 | 0.28 | 226 | 185 |
| KYSE510 | exonic   | <i>MUC4</i>     | nonsynonymous SNV   | NM_018406:c.C11468T:p.T3823I             |               | chr3  | 195506983 | 195506983 | G        | A | 0.9375      | 0.40 | 16  | 15  |
| KYSE510 | exonic   | <i>CLN8</i>     | nonsynonymous SNV   | NM_018941:c.G433A:p.G145R                |               | chr8  | 1719653   | 1719653   | G        | A | 0.990566038 | 0.38 | 106 | 105 |
| KYSE510 | exonic   | <i>ANK1</i>     | nonsynonymous SNV   | NM_000037:c.C1435A:p.R479S               |               | chr8  | 41573337  | 41573337  | G        | T | 1           | 0.23 | 30  | 30  |
| KYSE510 | exonic   | <i>CEP192</i>   | nonsynonymous SNV   | NM_032142:c.A6437G:p.D2146G              |               | chr18 | 13096186  | 13096186  | A        | G | 1           | 0.53 | 49  | 49  |
| KYSE510 | exonic   | <i>CEP350</i>   | nonsynonymous SNV   | NM_014810:c.A763G:p.T255A                |               | chr1  | 179966055 | 179966055 | A        | G | 1           | 0.46 | 188 | 188 |
| KYSE510 | exonic   | <i>DNAH6</i>    | nonsynonymous SNV   | NM_001370:c.C1820G:p.A607G               |               | chr2  | 84800607  | 84800607  | C        | G | 1           | 0.63 | 88  | 88  |
| KYSE510 | exonic   | <i>DNAI1</i>    | nonsynonymous SNV   | NM_012144:c.A676C:p.N226H                |               | chr9  | 34491547  | 34491547  | A        | C | 1           | 0.26 | 68  | 68  |
| KYSE510 | exonic   | <i>EPPK1</i>    | nonsynonymous SNV   | NM_031308:c.G1889A:p.R630Q               |               | chr8  | 144945533 | 144945533 | C        | T | 1           | 0.57 | 21  | 21  |
| KYSE510 | exonic   | <i>FAM55A</i>   | nonsynonymous SNV   | NM_152315:c.A662G:p.Y221C                |               | chr11 | 114393621 | 114393621 | T        | C | 1           | 0.75 | 52  | 52  |
| KYSE510 | exonic   | <i>FMN2</i>     | nonsynonymous SNV   | NM_020066:c.C1742T:p.P581L               |               | chr1  | 240286605 | 240286605 | C        | T | 1           | 0.57 | 125 | 125 |
| KYSE510 | exonic   | <i>MYT1L</i>    | nonsynonymous SNV   | NM_015025:c.C229A:p.P77T                 |               | chr2  | 1947030   | 1947030   | G        | T | 1           | 0.38 | 112 | 112 |

**Supplementary Table 12. Detailed mRNA changes in GSE23400 and GSE20347 datasets**

|         | GSE23400 (N=53) |             | GSE20347 (N=17) |             | GSE23400 cases | GSE20347 cases | Total cases | total% |
|---------|-----------------|-------------|-----------------|-------------|----------------|----------------|-------------|--------|
|         | UP/DOWN (%)     | P VALUE     | UP/DOWN (%)     | P VALUE     |                |                |             |        |
| EGFR    | 11.32075472     | 2.37E-05    | 5.882352941     | 0.007895971 | 6              | 1              | 7           | 10     |
| ERBB4   | No change       |             | 29.41176471     | 0.230702647 |                |                |             |        |
| FGFR1   | 1.886792453     | 0.001323702 | 11.76470588     | 0.042628458 |                |                |             |        |
| FGFR2   | 1.886792453     | 0.150144376 | No change       |             |                |                |             |        |
| FGFR4   | No change       |             | No change       |             |                |                |             |        |
| MET     | 3.773584906     | 2.26E-14    | 35.29411765     | 2.56E-06    | 2              | 6              | 8           | 11.4   |
| HGF     | No change       |             | No change       |             |                |                |             |        |
| EPHA4   | No change       |             | 11.76470588     | 0.647604276 |                |                |             |        |
| EPHA7   | 9.433962264     | 0.021790414 | 5.882352941     | 0.141581499 |                |                |             |        |
| EPHB1   | No change       |             | No change       |             |                |                |             |        |
| JAK1    | 3.773584906     | 0.114802599 | 5.882352941     | 0.134851341 |                |                |             |        |
| JAK2    | No change       |             | 52.94117647     | 4.01E-07    |                |                |             |        |
| HSPBAP1 | 26.41509434     | 7.90E-15    | 64.70588235     | 3.26E-07    | 14             | 11             | 25          | 35.7   |
| CTSK    | 39.62264151     | 1.36E-11    | 76.47058824     | 4.83E-06    | 21             | 13             | 34          | 48.6   |
| FN1     | 47.16981132     | 1.39E-07    | 70.58823529     | 0.000315771 | 25             | 12             | 37          | 52.9   |
| IL7R    | 7.547169811     | 0.008930564 | 17.64705882     | 0.921657529 |                |                |             |        |
| PIK3CA  | 22.64150943     | 1.96E-09    | 17.64705882     | 0.000206892 | 12             | 3              | 15          | 21.4   |
| PIK3C2A | 3.773584906     | 0.015090773 | 11.76470588     | 0.001161327 |                |                |             |        |
| PIK3CG  | No change       |             | No change       |             |                |                |             |        |
| PIK3C2G | 3.773584906     | 0.001470327 | 35.29411765     | 1.30E-05    | 2              | 6              | 8           | 11.4   |
| PIK3C3  | No change       |             | No change       |             |                |                |             |        |
| RPS6KA6 | No change       |             | No change       |             |                |                |             |        |
| RPS6KA1 | 16.98113208     | 4.93E-09    | 23.52941176     | 0.001874493 | 9              | 4              | 13          | 18.6   |
| MTOR    | No change       |             | No change       |             |                |                |             |        |
| XPO1    | 32.0754717      | 1.23E-13    | 35.29411765     | 2.12E-06    | 17             | 6              | 23          | 32.9   |
| ALK     | 1.886792453     | 0.002898885 | No change       |             |                |                |             |        |
| BRCA1   | No change       |             | 11.76470588     | 3.91E-07    |                |                |             |        |
| BRCA2   | 1.886792453     | 5.78E-05    | 11.76470588     | 0.013021544 |                |                |             |        |
| KIT     | 32.0754717      | 4.98E-08    | 47.05882353     | 0.028009105 |                |                |             |        |
| MAGEC1  | 1.886792453     | 0.727750416 | 11.76470588     | 0.135146209 |                |                |             |        |
| MAGEC3  | No change       |             | No change       |             |                |                |             |        |
| HER-2   | N.D.            |             | N.D.            |             |                |                |             |        |
| APC     | No change       |             | No change       |             |                |                |             |        |
| PTEN    | No change       |             | No change       |             |                |                |             |        |
| PDGFR   | N.D.            |             | N.D.            |             |                |                |             |        |
| PTPN11  | No change       |             | No change       |             |                |                |             |        |
| NF1     | No change       |             | No change       |             |                |                |             |        |
| TP53    | 15.09433962     | 0.00112175  | 17.64705882     | 0.557665795 |                |                |             |        |

**Over-expression** **Down-regulation**

N.D., No data available.

**Supplementary Table 13a. Primers for qRT-PCR**

| qRT-PCR primer | Sequence (5'to3')    |
|----------------|----------------------|
| ZNF750-F       | TAAGCCTCAATGTTGTGAAC |
| ZNF750-R       | CTGATTTCTTGGAGAGTTG  |
| SPRR1A-F       | AATCATAATCGCTCCTTTGC |
| SPRR1A-R       | TTGAAGGAAGACTAGGGATG |
| FLG-F          | CAAGGTTACATTTATTGCC  |
| FLG-R          | TCAACCATATCTGGGTCATC |
| LOR-F          | GTTTGCAAATCCTTCATGTC |
| LOR-R          | AAACCAAAGAGGCTAAACAG |
| LCE3D-F        | GAGGAAACAAGAATCCCAAG |
| LCE3D-R        | AAAGCCAGAAGAGGGTATC  |
| LCE3A-F        | GAACCAGCAGCAGTGCCA   |
| LCE3A-R        | CGCCTTGCTGACCACTTC   |
| GAPDH-F        | GTCAGTGGTGGACCTGACCT |
| GAPDH-R        | AGGGGTCTACATGGCAACTG |

**Supplementary Table 13b. shRNA targeting sequences**

| Gene Symbol | GENE ID | shRNA Sequence (5'to3') |
|-------------|---------|-------------------------|
| <i>XPO1</i> | 7514    | GCTCAAGAAGTACTGACACAT   |
| <i>FAT2</i> | 2196    | GCTCTGAACCTTCTTTGTAA    |

**Supplementary Table 13c. Cloning primers**

| Cloning primers | Restriction enzymes | Sequence (5'to3')                                                          |
|-----------------|---------------------|----------------------------------------------------------------------------|
| FAT1-SHC003-F   | <i>Nhe I</i>        | CTAGCTAGCGCTACCGGTCGCCACCATGGGGAGACATTTGGCTTT                              |
| FAT1-SHC003-R   | <i>Fse I</i>        | CTACGAGGCCGGCCCTATTACTTATCGTCGTCATCCTTG                                    |
| ZNF750-SHC003-F | <i>Nhe I</i>        | CTAGCTAGCGCTACCGGTCGCCACCATGAGTCTCCTCAAAGAGCG<br>GAAGCCAAAAA               |
| ZNF750-SHC003-R | <i>Fse I</i>        | CTACGAGGCCGGCCCTTACTTATCGTCGTCATCCTTGTAATCGGACA<br>CCCGGGCCCTCCTTCGTAGTGTG |

**Supplementary Table 13d. siRNA targeting sequences**

| Gene Symbol   | GENE ID | siRNA Sequence (5'to3') |
|---------------|---------|-------------------------|
| <i>FAT1</i>   | 2195    | GAAAUACCUACUCAAUAA      |
| <i>FAT1</i>   | 2195    | GAACUAACAUGGCUGGUUU     |
| <i>FAT1</i>   | 2195    | GGAAGGAAUUGGAAUCGUU     |
| <i>FAT1</i>   | 2195    | GAACUGAUGCCUCGGGUUU     |
| <i>ZNF750</i> | 79755   | GGAAAGCCCUUCAAGUAUA     |
| <i>ZNF750</i> | 79755   | CCACCAGAGUUUCCACAUA     |
| <i>ZNF750</i> | 79755   | UCAAGAGCGGAAGCCAAA      |
| <i>ZNF750</i> | 79755   | GCCGAUUCUUACGGAUUU      |

## Supplementary References

1. Lawrence MS, Stojanov P, Polak P, et al. Mutational heterogeneity in cancer and the search for new cancer-associated genes. *Nature*. 2013. Prepublished on 2013/06/19 as DOI 10.1038/nature12213.
2. Govindan R, Ding L, Griffith M, et al. Genomic landscape of non-small cell lung cancer in smokers and never-smokers. *Cell*. 2012;150(6):1121-1134.
3. Kandoth C, McLellan MD, Vandin F, et al. Mutational landscape and significance across 12 major cancer types. *Nature*. 2013;502(7471):333-339.
4. Sato Y, Yoshizato T, Shiraishi Y, et al. Integrated molecular analysis of clear-cell renal cell carcinoma. *Nat Genet*. 2013;45(8):860-867. Prepublished on 2013/06/26 as DOI 10.1038/ng.2699.
5. Yoshida K, Sanada M, Shiraishi Y, et al. Frequent pathway mutations of splicing machinery in myelodysplasia. *Nature*. 2011;478(7367):64-69. Prepublished on 2011/09/13 as DOI 10.1038/nature10496.
6. Agrawal N, Jiao Y, Bettgowda C, et al. Comparative genomic analysis of esophageal adenocarcinoma and squamous cell carcinoma. *Cancer Discov*. 2012;2(10):899-905. Prepublished on 2012/08/11 as DOI 10.1158/2159-8290.CD-12-0189.
7. Beroukhi R, Mermel CH, Porter D, et al. The landscape of somatic copy-number alteration across human cancers. *Nature*. 2010;463(7283):899-905. Prepublished on 2010/02/19 as DOI 10.1038/nature08822.
8. Hu N, Wang C, Ng D, et al. Genomic characterization of esophageal squamous cell carcinoma from a high-risk population in China. *Cancer Res*. 2009;69(14):5908-5917. Prepublished on 2009/07/09 as DOI 10.1158/0008-5472.CAN-08-4622.
9. Bass AJ, Watanabe H, Mermel CH, et al. SOX2 is an amplified lineage-survival oncogene in lung and esophageal squamous cell carcinomas. *Nat Genet*. 2009;41(11):1238-1242. Prepublished on 2009/10/06 as DOI 10.1038/ng.465.
10. Wei Q, Chen L, Sheng L, Nordgren H, Wester K, Carlsson J. EGFR, HER2 and HER3 expression in esophageal primary tumours and corresponding metastases. *Int J Oncol*. 2007;31(3):493-499. Prepublished on 2007/08/03 as DOI.
11. Sato-Kuwabara Y, Neves JI, Fregnani JH, Sallum RA, Soares FA. Evaluation of gene amplification and protein expression of HER-2/neu in esophageal squamous cell carcinoma using Fluorescence in situ Hybridization (FISH) and immunohistochemistry. *BMC Cancer*. 2009;9:6. Prepublished on 2009/01/09 as DOI 10.1186/1471-2407-9-6.
12. Zhang Y, Du XL, Wang CJ, et al. Reciprocal activation between PLK1 and Stat3 contributes to survival and proliferation of esophageal cancer cells. *Gastroenterology*. 2012;142(3):521-530 e523. Prepublished on 2011/11/24 as DOI 10.1053/j.gastro.2011.11.023.
13. Akagi I, Miyashita M, Makino H, et al. Overexpression of PIK3CA is associated with lymph node metastasis in esophageal squamous cell carcinoma. *Int J Oncol*. 2009;34(3):767-775. Prepublished on 2009/02/13 as DOI.
14. Boone J, Ten Kate FJ, Offerhaus GJ, van Diest PJ, Rinkes IH, van Hillegersberg R. mTOR in squamous cell carcinoma of the oesophagus: a potential target for molecular therapy? *J Clin Pathol*. 2008;61(8):909-913. Prepublished on 2008/05/14 as DOI 10.1136/jcp.2008.055772.
15. Somaiah N, Simon GR. Molecular targeted agents and biologic therapies for lung cancer. *J Thorac Oncol*. 2011;6(11 Suppl 4):S1758-1785. Prepublished on 2011/10/26 as DOI

10.1097/01.JTO.0000407557.30793.a6.

16. Garnett MJ, Edelman EJ, Heidorn SJ, et al. Systematic identification of genomic markers of drug sensitivity in cancer cells. *Nature*. 2012;483(7391):570-575. Prepublished on 2012/03/31 as DOI 10.1038/nature11005.
